# Supplementary material
Source: PubMed Central journal article supplement (PMC8897263)

# Figure 1

Biopsy size nephrectomy samples - ~ 7.5 mg, CRYO, 8 patients

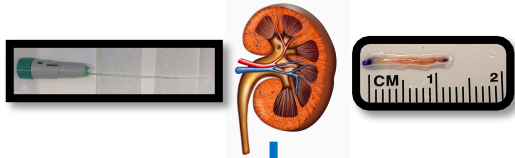

Tissue dissociation using Liberase TL (500U/ml) with DNASE 1

~32,000 cells/pt.  
Cell Viability: 50 – 85%

**Singleplexed scRNA Seq**

- 20,000 cells/pt.

**SNP Array**

- 30 ng DNA/ 5000 cells
- 22.2 ng minimum

**Multiplexed scRNA Seq**

- 5000 cells/pt.
- 4 pts./pool

Individual SNPs identified

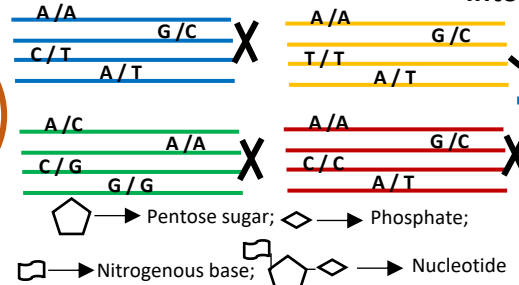

Demultiplexing pooled data into individual samples using **Demuxlet**

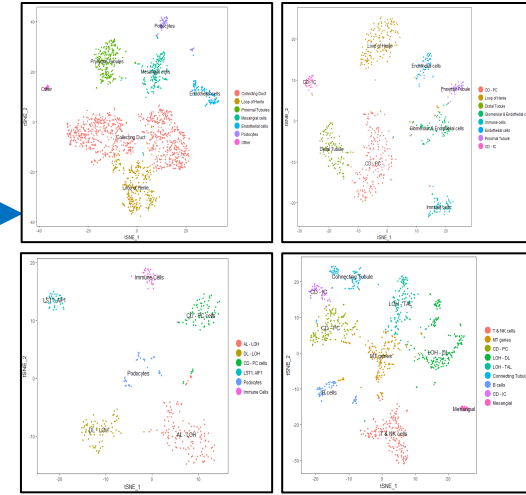

Deconvolute individual patient samples

Downstream Analysis

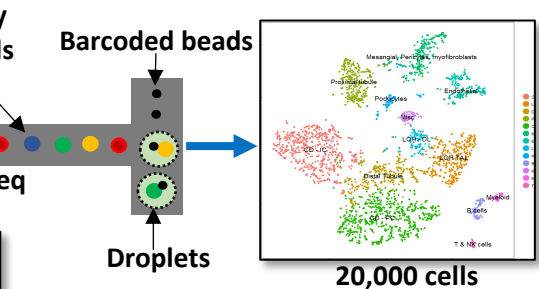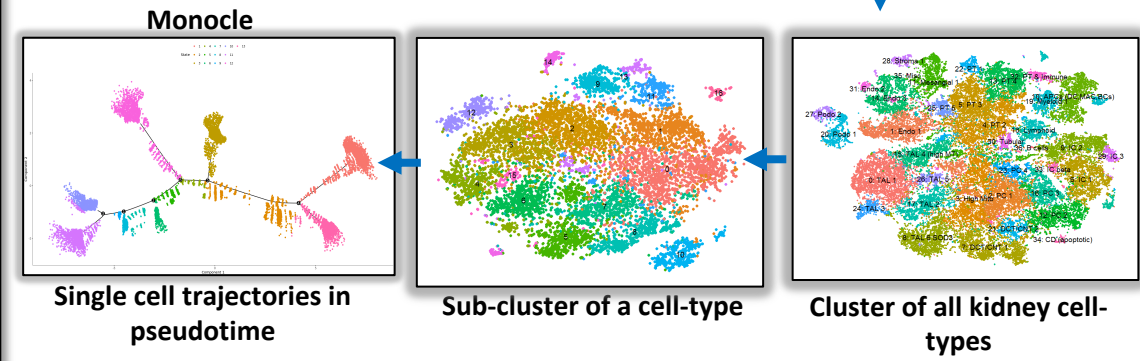

- QC Metrics**
- Mitochondrial gene  $\leq 50\%$
  - Cell quality  $\geq 500$  genes/cell
  - Maximum genes per cell 6000
  - Demultiplexed SNP/cell/pt.  $\geq 25$
- Advantages**
- Low doublet rate  $< 5\%$
  - Less batch effect
  - Cost-effective
  - Major cell types identified
  - Repeatability
  - Reproducibility
- Disadvantages**
- Lower number of cells output

- QC Metrics**
- Mitochondrial gene  $\leq 50\%$
  - Cell quality  $\geq 500$  genes/cell
  - Maximum genes per cell 6000
- Advantages**
- Higher number of output cells
- Disadvantages**
- Additional tools maybe required to predict doublets more accurately
  - Expensive
  - Significant batch effect

Sequencing & Analysis

**Figure 2**

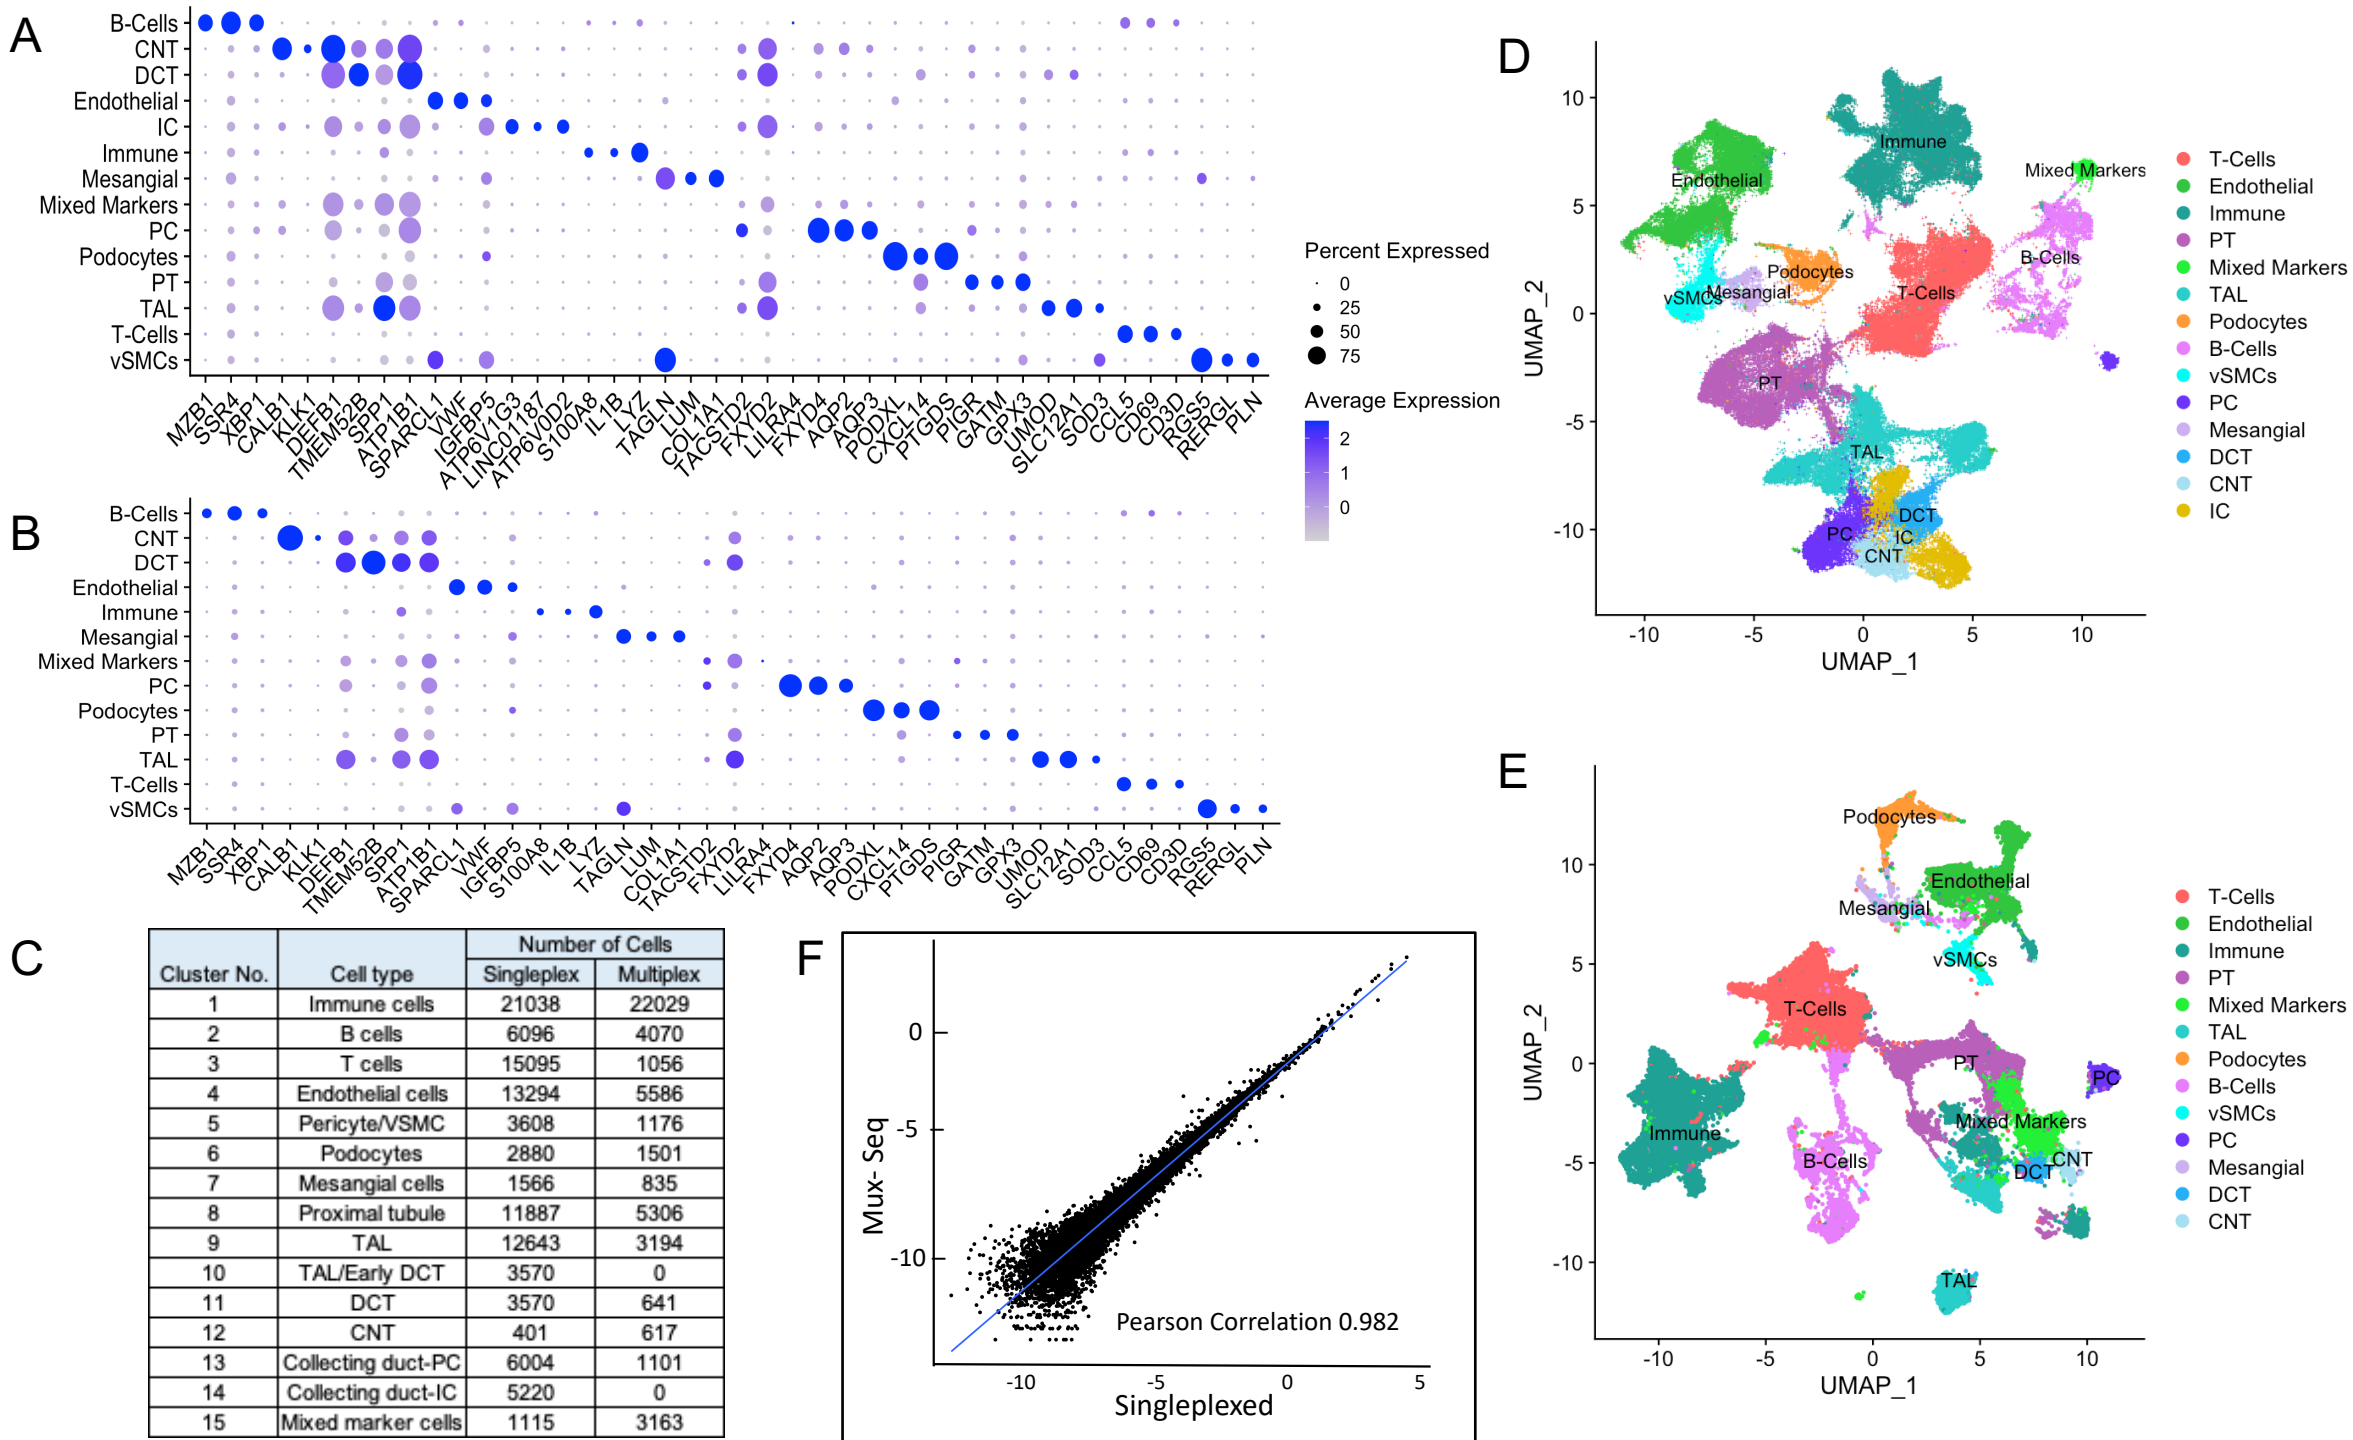



**Figure 3**

**A**

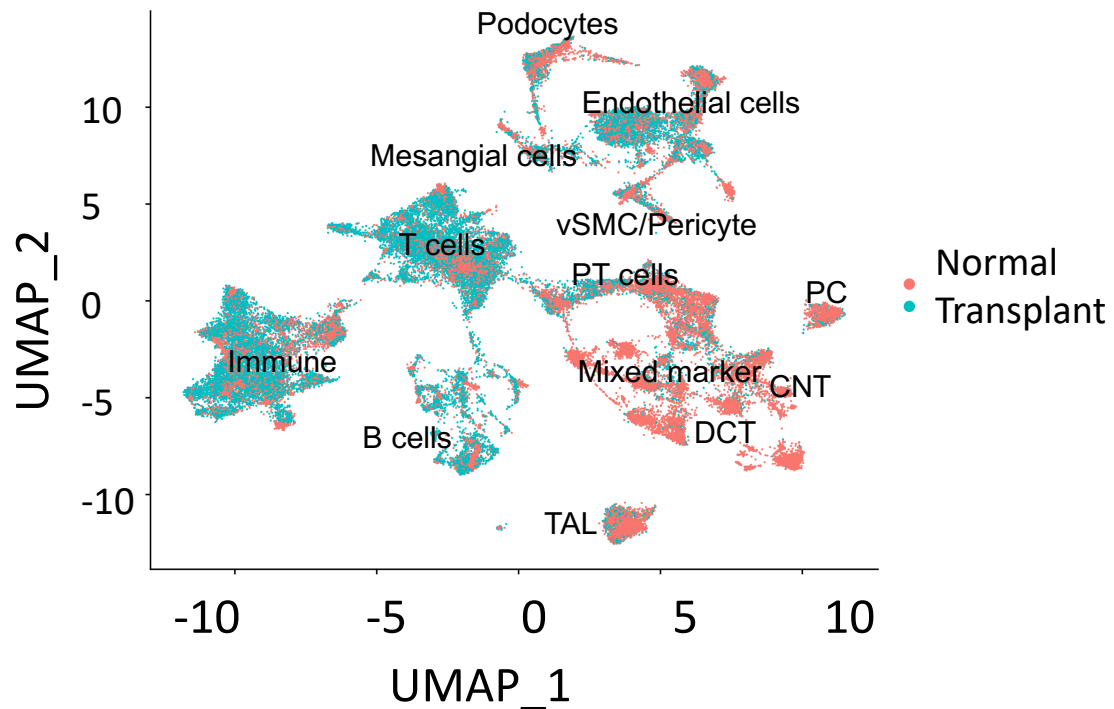

**B**

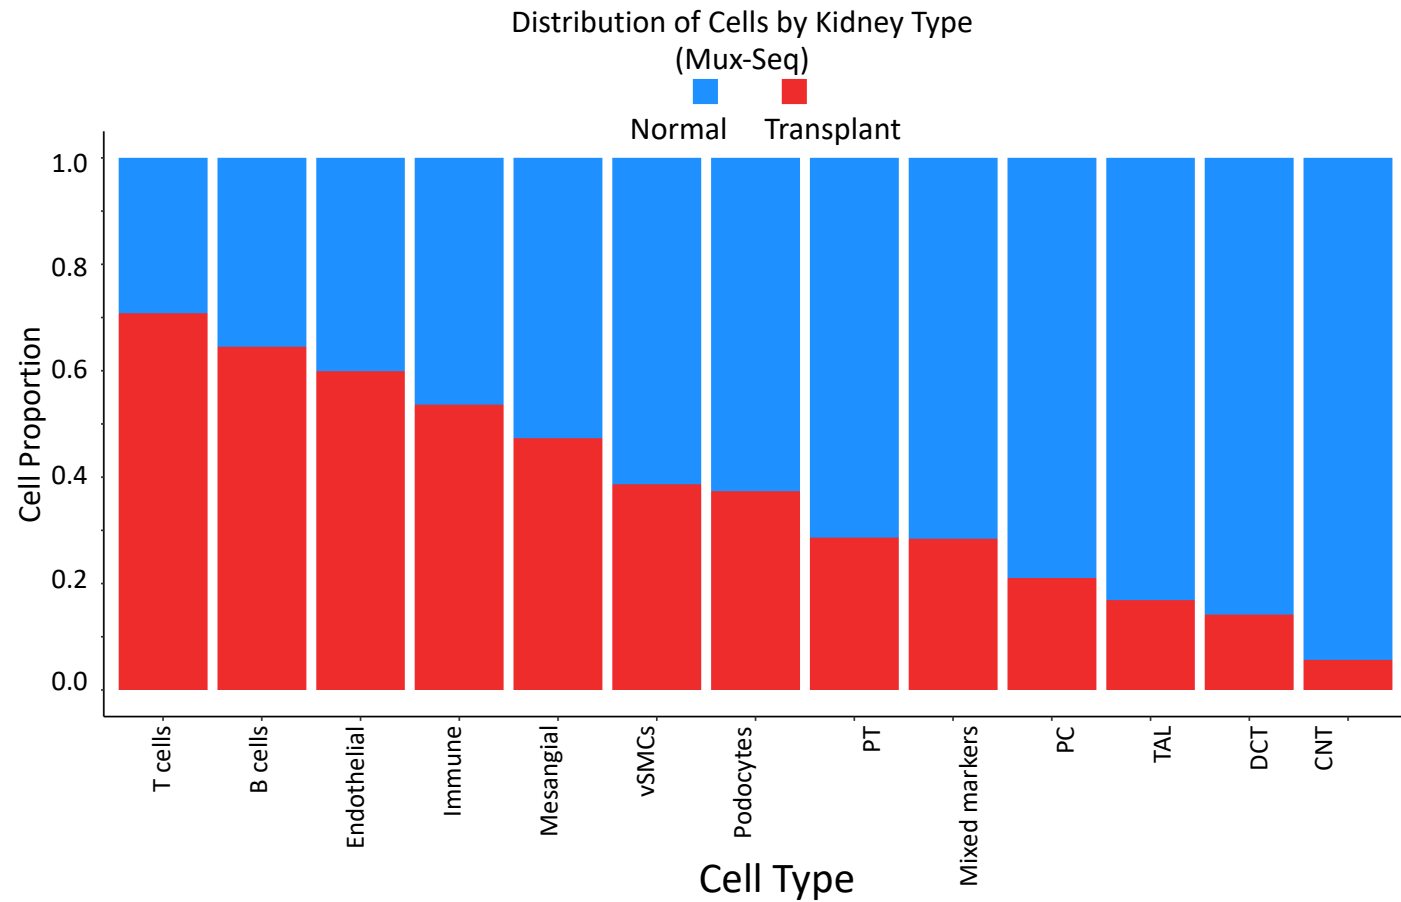

**Figure 4**

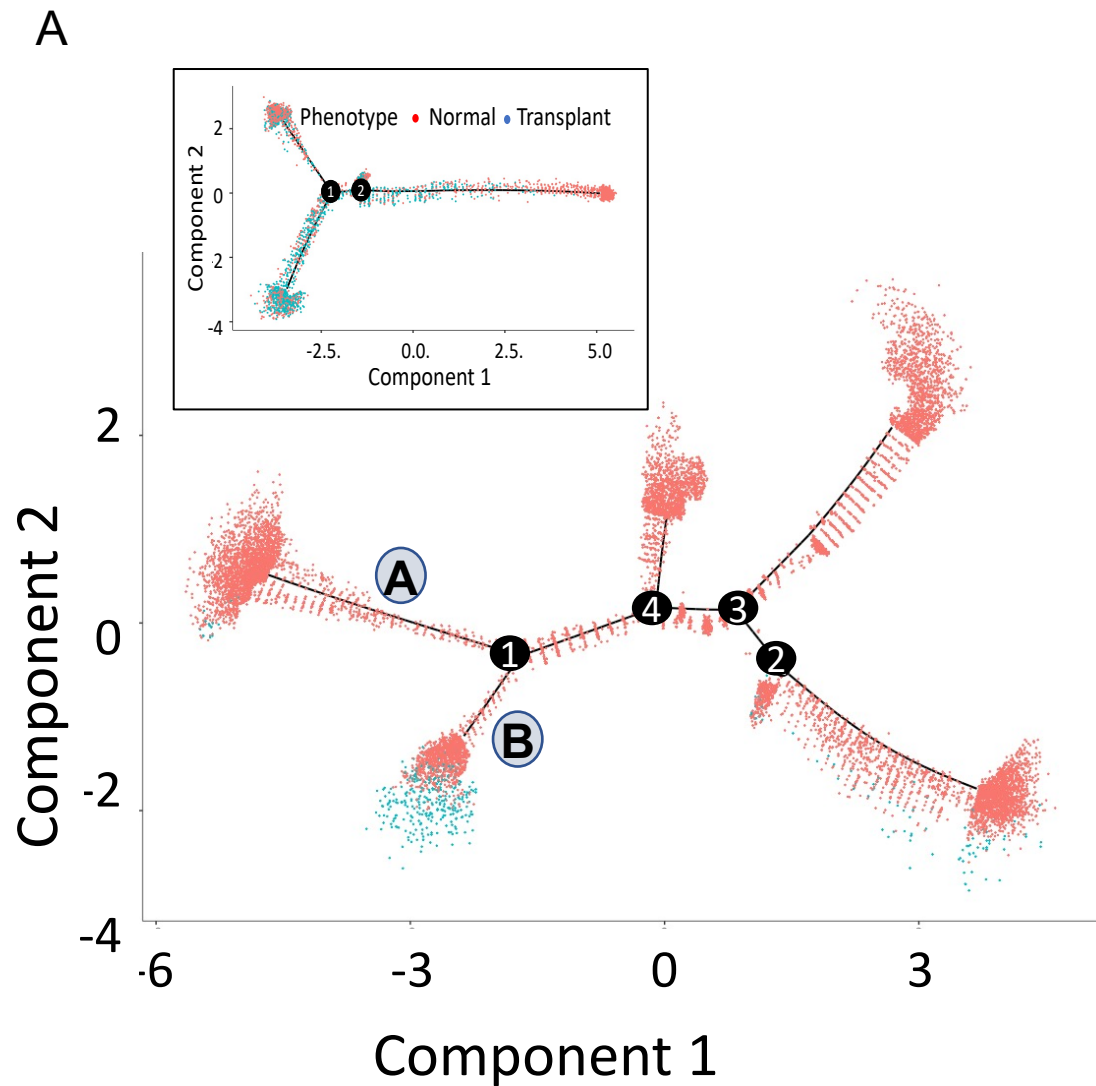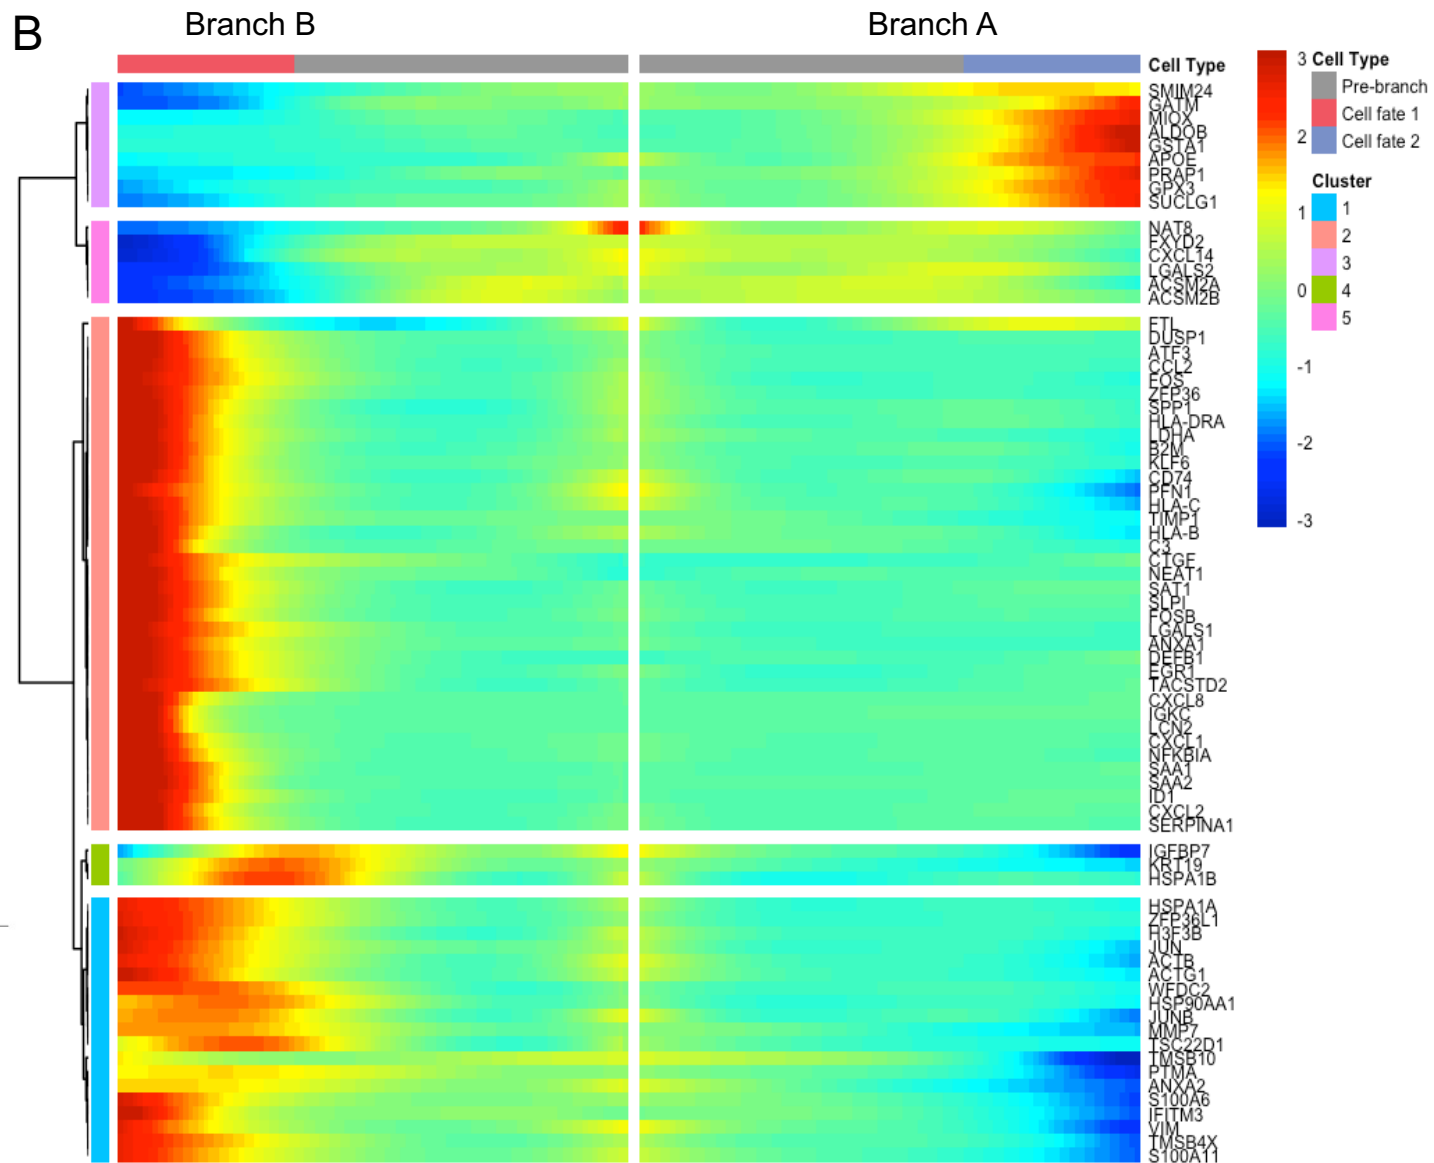

**Figure 5**

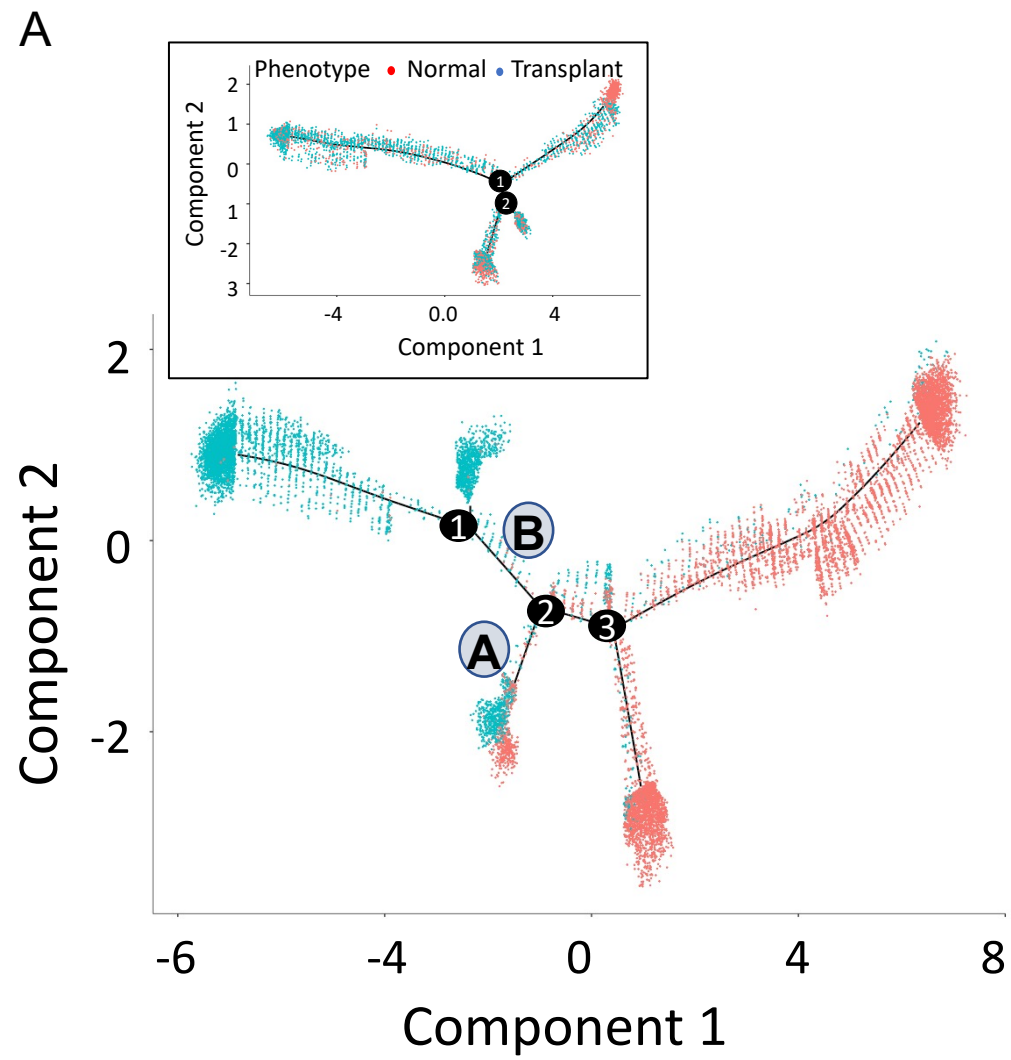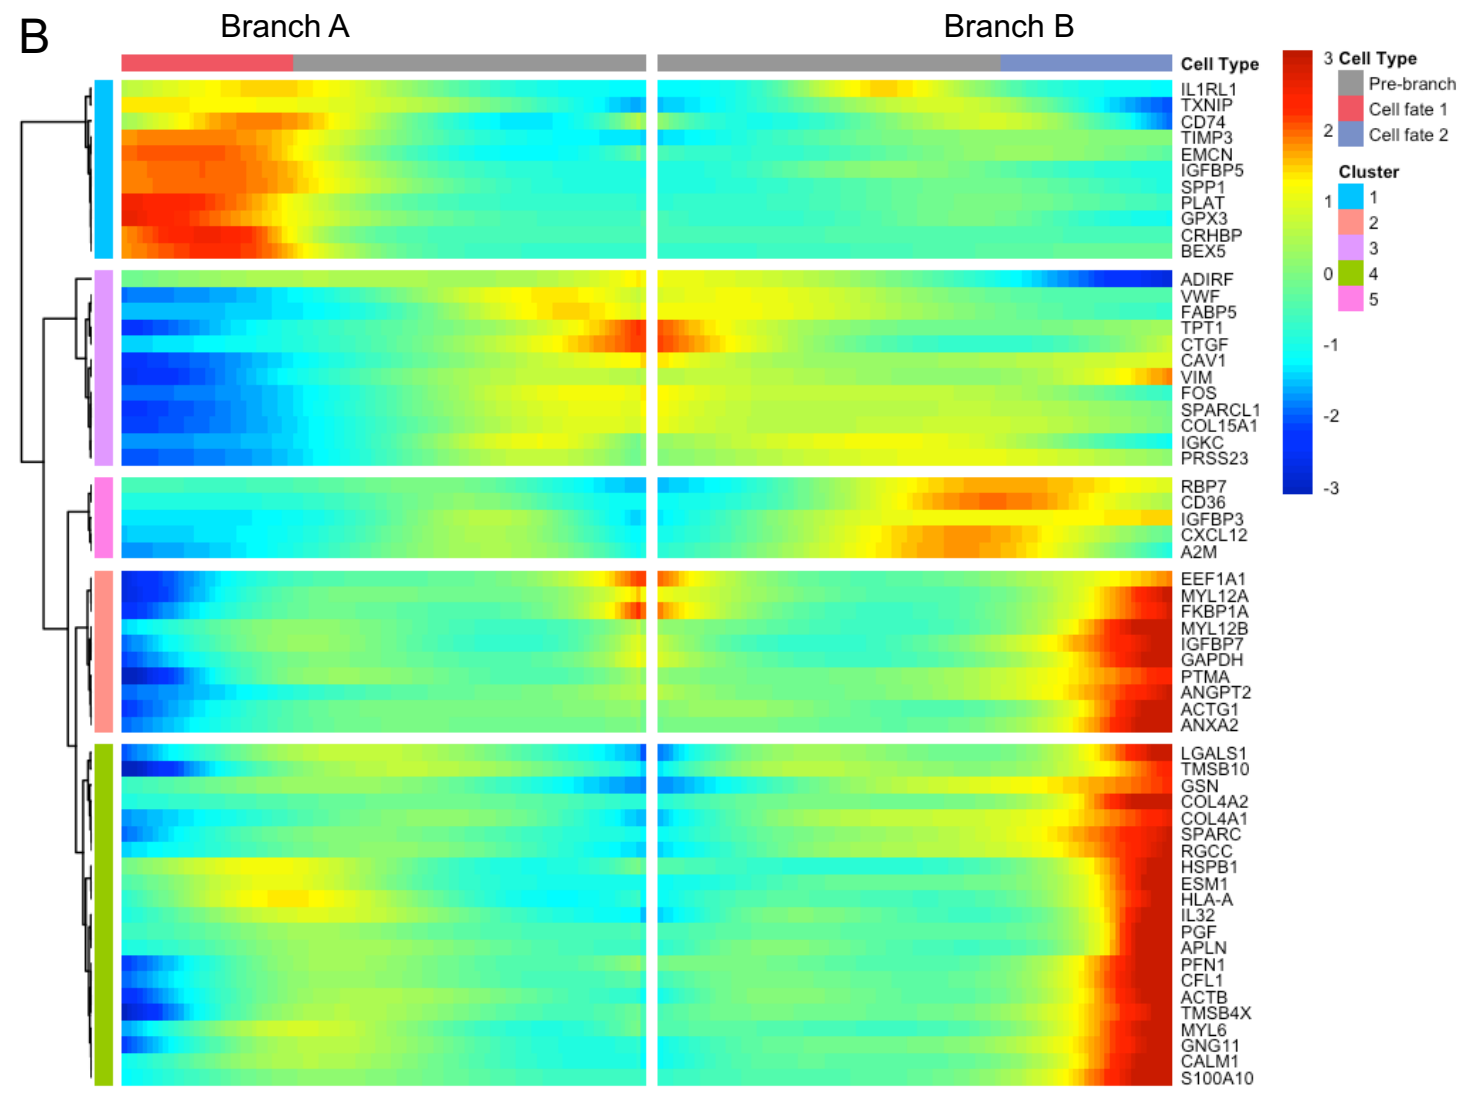

# Supplemental Figures



**Supplementary Figure S1**

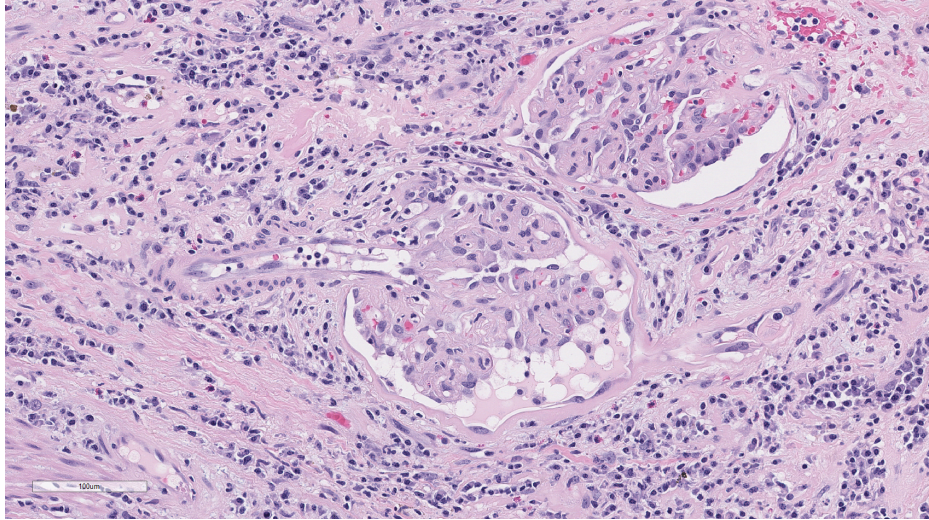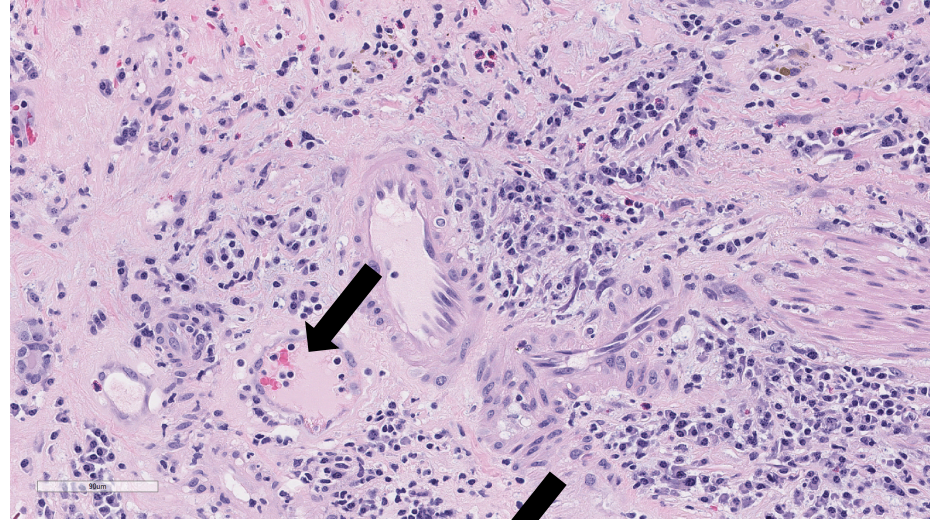

**A. Explant  
kidney sample  
2582**

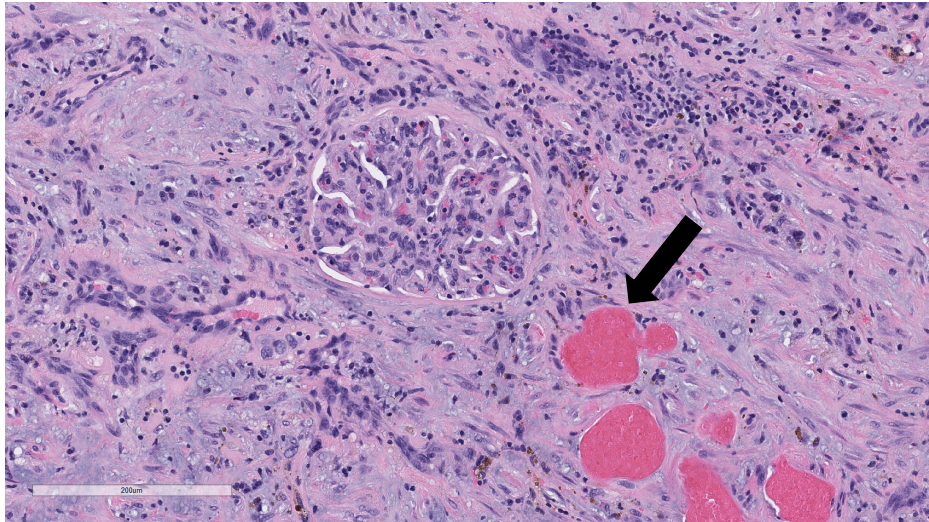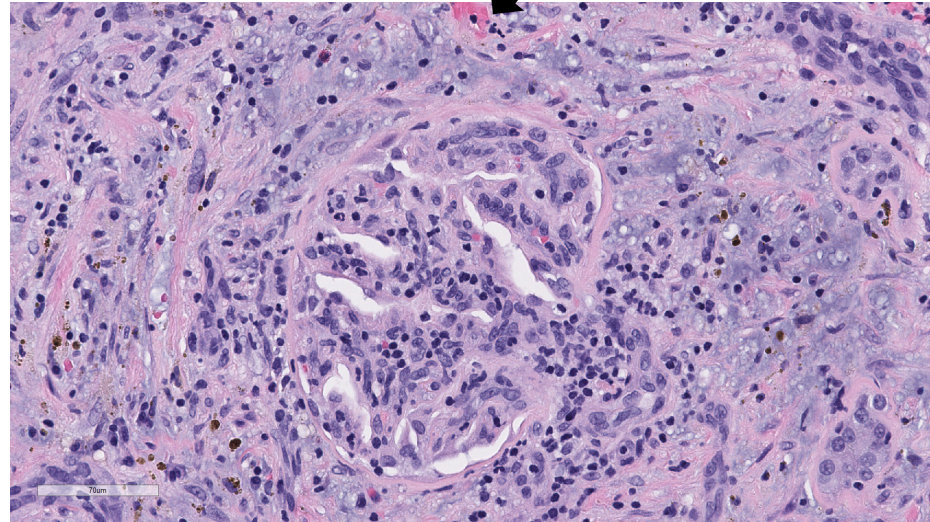

**B. Explant  
kidney sample  
2584**



## Supplementary Figure S2

A

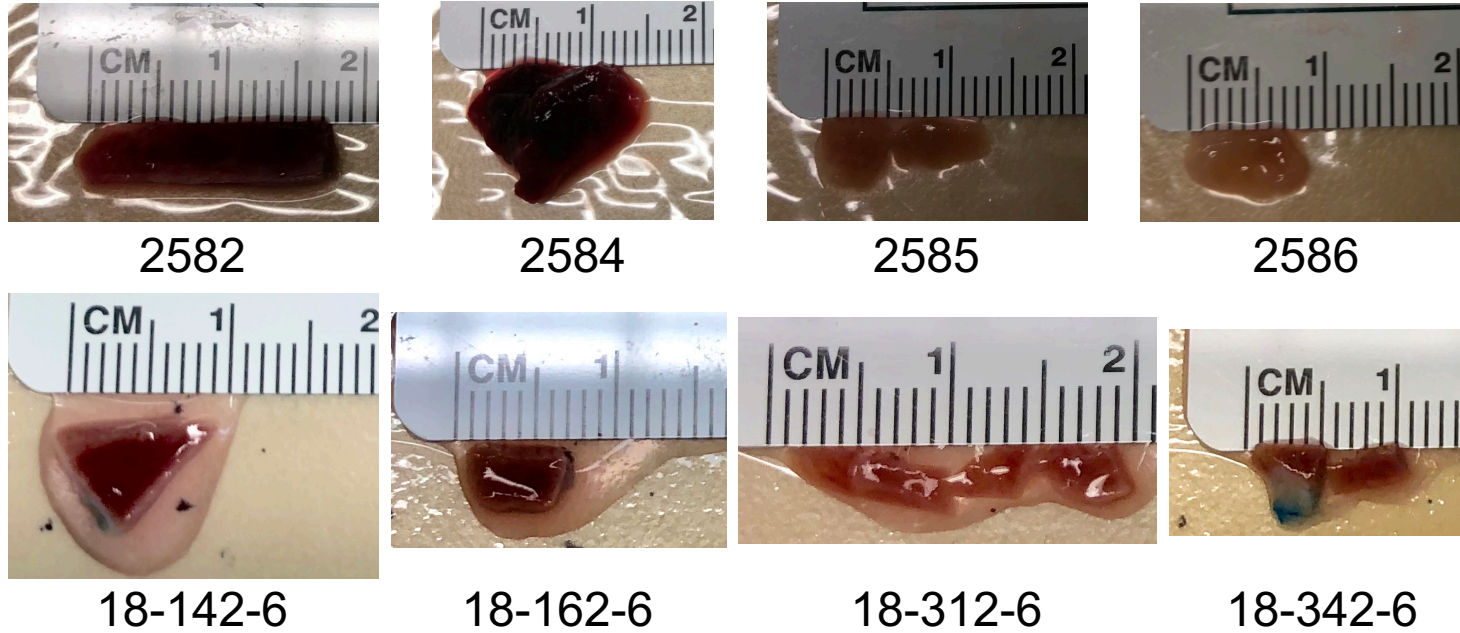

B

| Patient ID | Singleplex |                | Multiplex          |                    |                    |                 |
|------------|------------|----------------|--------------------|--------------------|--------------------|-----------------|
|            | 10X Input  | Output afte QC | Pool 1 (10X Input) | Pool 2 (10X Input) | Pool 3 (10X Input) | Output after QC |
| 2582       | 20,000     | 25,806         | 5,000              | 5,000              |                    | 13,805          |
| 2584       | 20,000     | 10,926         | 5,000              | 5,000              |                    | 11,000          |
| 2585       | 10,000     | 9,986          | 5,000              | 5,000              |                    | 6,276           |
| 2586       | 20,000     | 20,120         | 5,000              | 5,000              |                    | 9,380           |
| 18-142-6   | 10,000     | 16,566         |                    |                    | 5,000              | 5,368           |
| 18-162-6   | 5,000      | 0              |                    |                    | 5,000              | 1,215           |
| 18-312-6   | 6000       | 12,801         |                    |                    | 5,000              | 2,529           |
| 18-342-6   | 20000      | 10,555         |                    |                    | 5,000              | 702             |

# Supplementary Figure S3

A

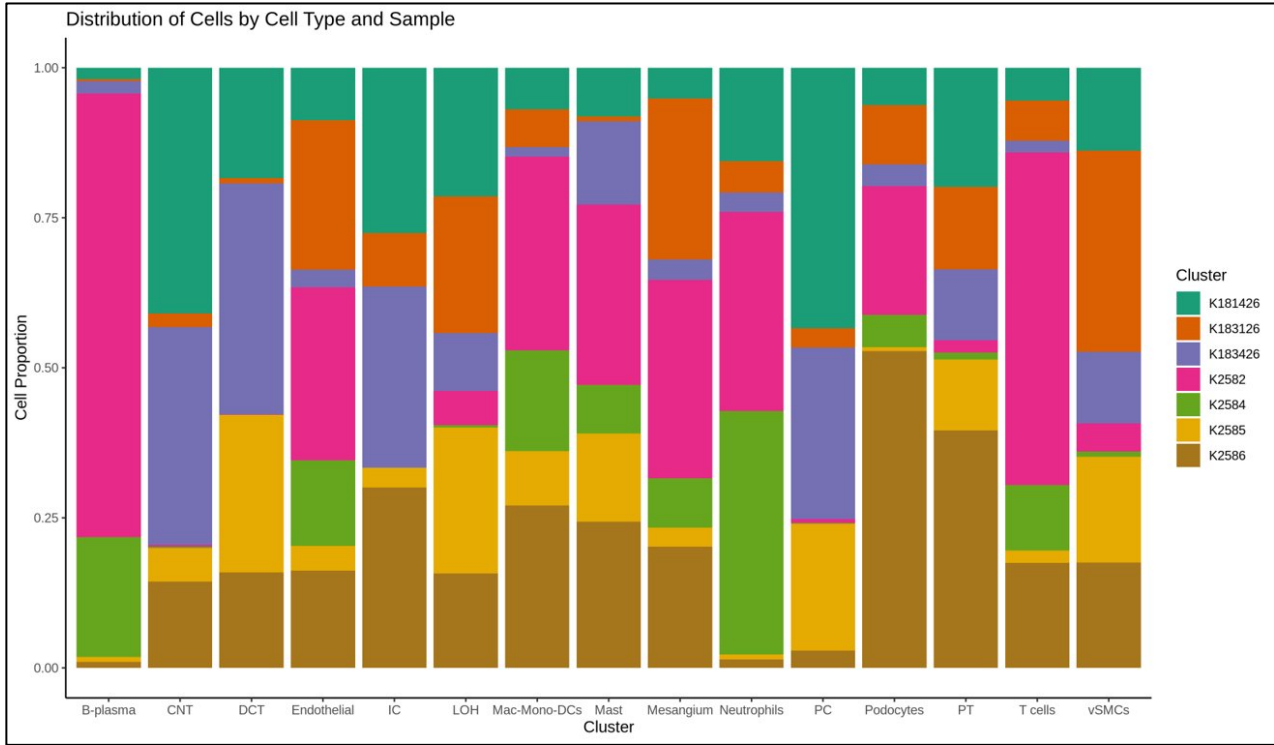

B

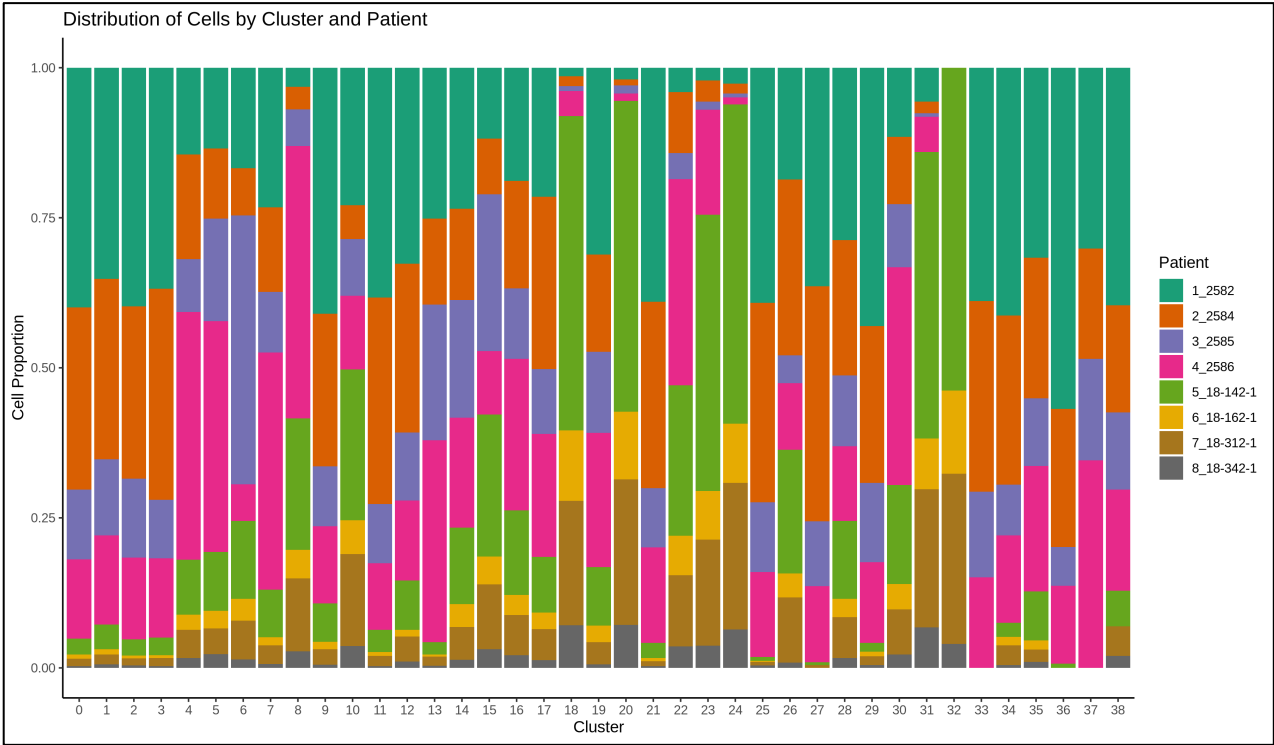

# Supplementary Figure S4

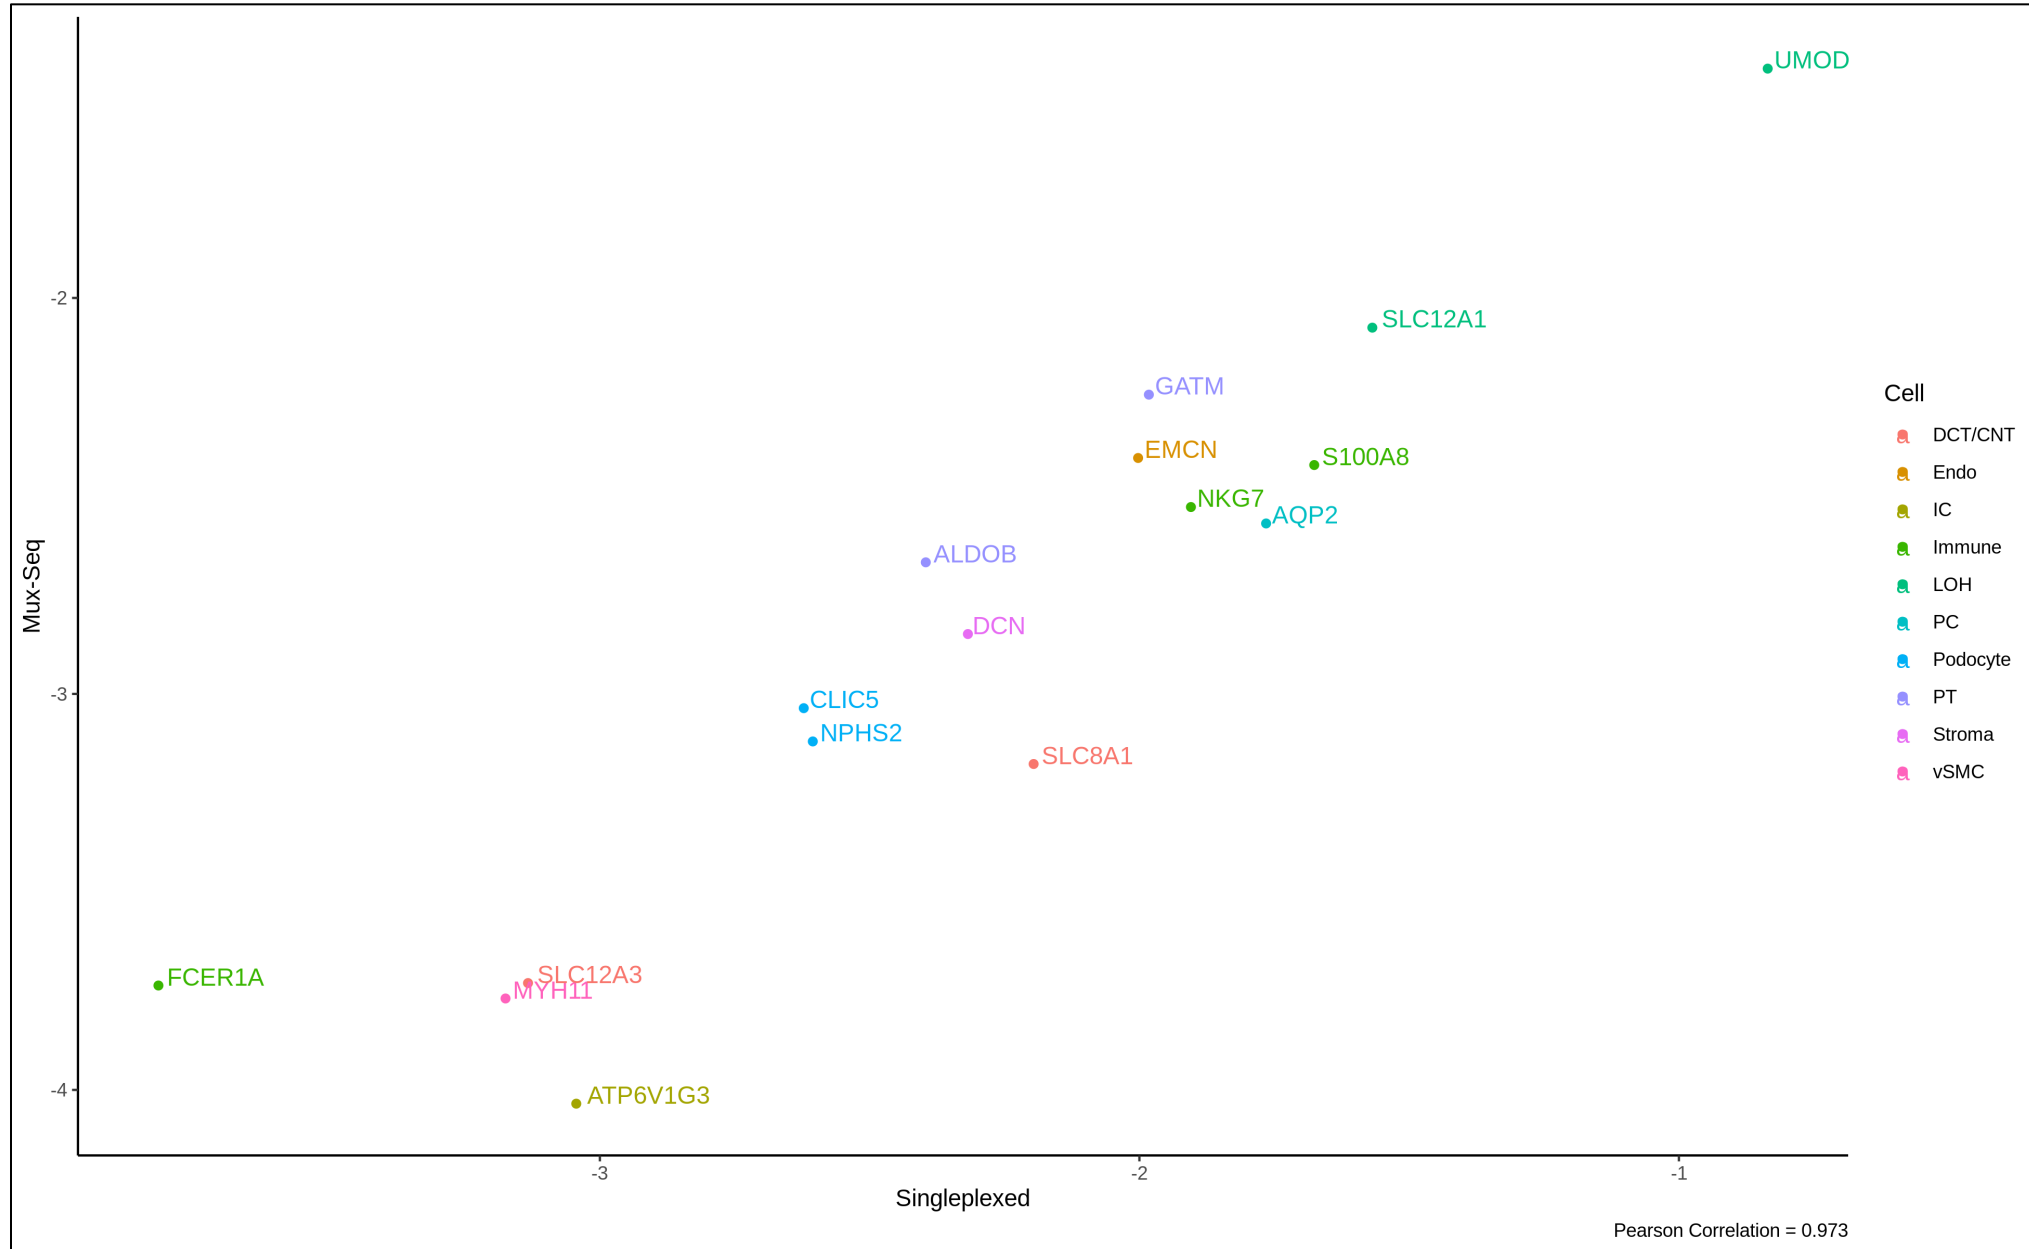



# Supplementary Figure S5

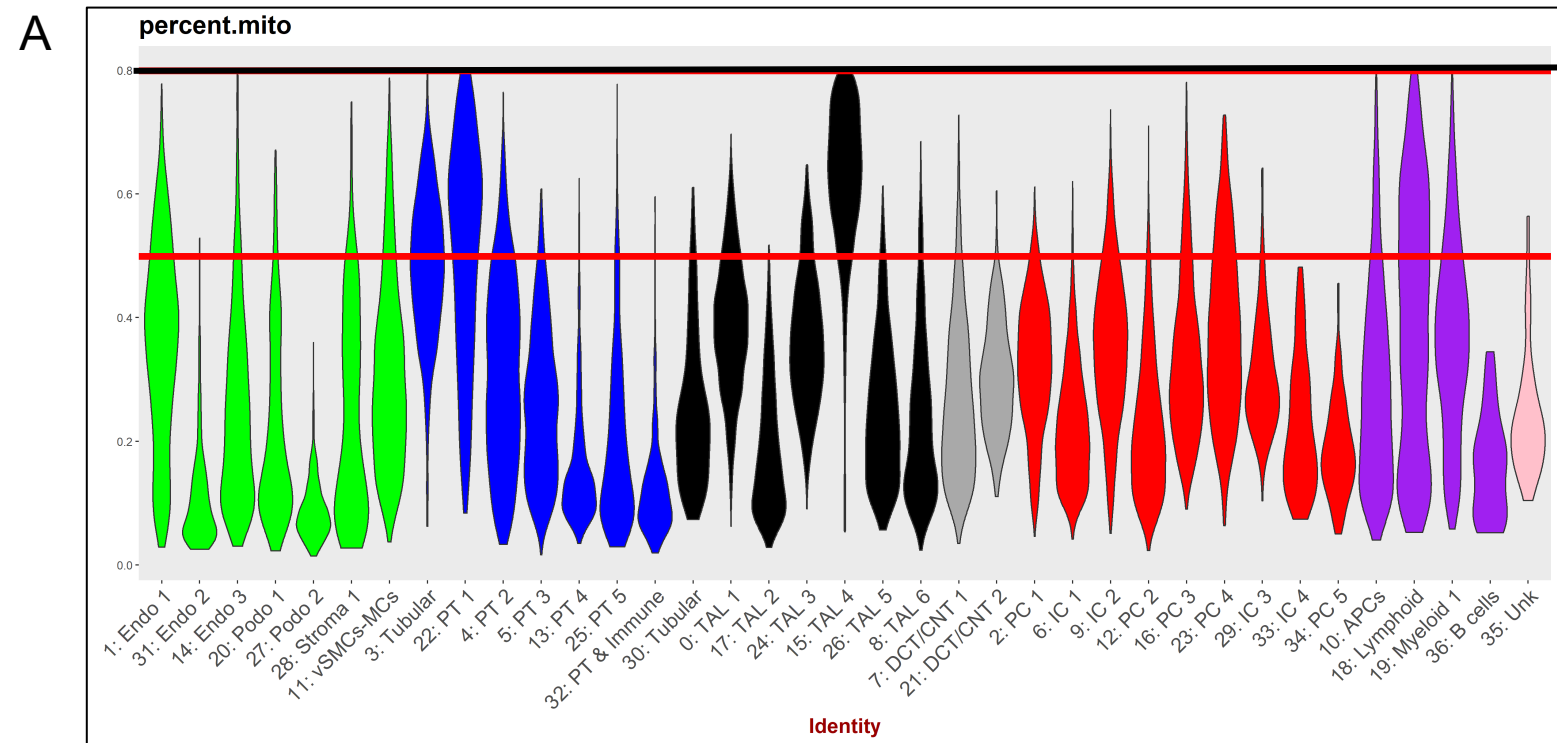

**B**

| #term ID   | Enriched Biological Process                            | # genes in set | # total genes in process | %     | false discovery rate |
|------------|--------------------------------------------------------|----------------|--------------------------|-------|----------------------|
| GO:0055114 | oxidation-reduction process                            | 23             | 923                      | 2.5%  | 1.32E-08             |
| GO:0006091 | generation of precursor metabolites and energy         | 16             | 388                      | 4.1%  | 1.56E-08             |
| GO:0022904 | respiratory electron transport chain                   | 10             | 96                       | 10.4% | 1.77E-08             |
| GO:0044281 | small molecule metabolic process                       | 30             | 1779                     | 1.7%  | 3.63E-08             |
| GO:0046034 | ATP metabolic process                                  | 12             | 190                      | 6.3%  | 3.63E-08             |
| GO:0042775 | mitochondrial ATP synthesis coupled electron transport | 9              | 78                       | 11.5% | 4.66E-08             |
| GO:0044242 | cellular lipid catabolic process                       | 7              | 167                      | 4.2%  | 0.00065              |
| GO:0009062 | fatty acid catabolic process                           | 5              | 84                       | 6.0%  | 0.0019               |
| GO:0006631 | fatty acid metabolic process                           | 8              | 294                      | 2.7%  | 0.0024               |
| GO:0006811 | ion transport                                          | 17             | 1292                     | 1.3%  | 0.0024               |
| GO:0044248 | cellular catabolic process                             | 19             | 1646                     | 1.2%  | 0.004                |
| GO:0003091 | renal water homeostasis                                | 3              | 35                       | 8.6%  | 0.0142               |
| GO:0042592 | homeostatic process                                    | 16             | 1491                     | 1.1%  | 0.0215               |
| GO:0006094 | gluconeogenesis                                        | 3              | 46                       | 6.5%  | 0.0262               |
| GO:0034220 | ion transmembrane transport                            | 14             | 995                      | 1.4%  | 0.0045               |

# Supplementary Figure S6A

A

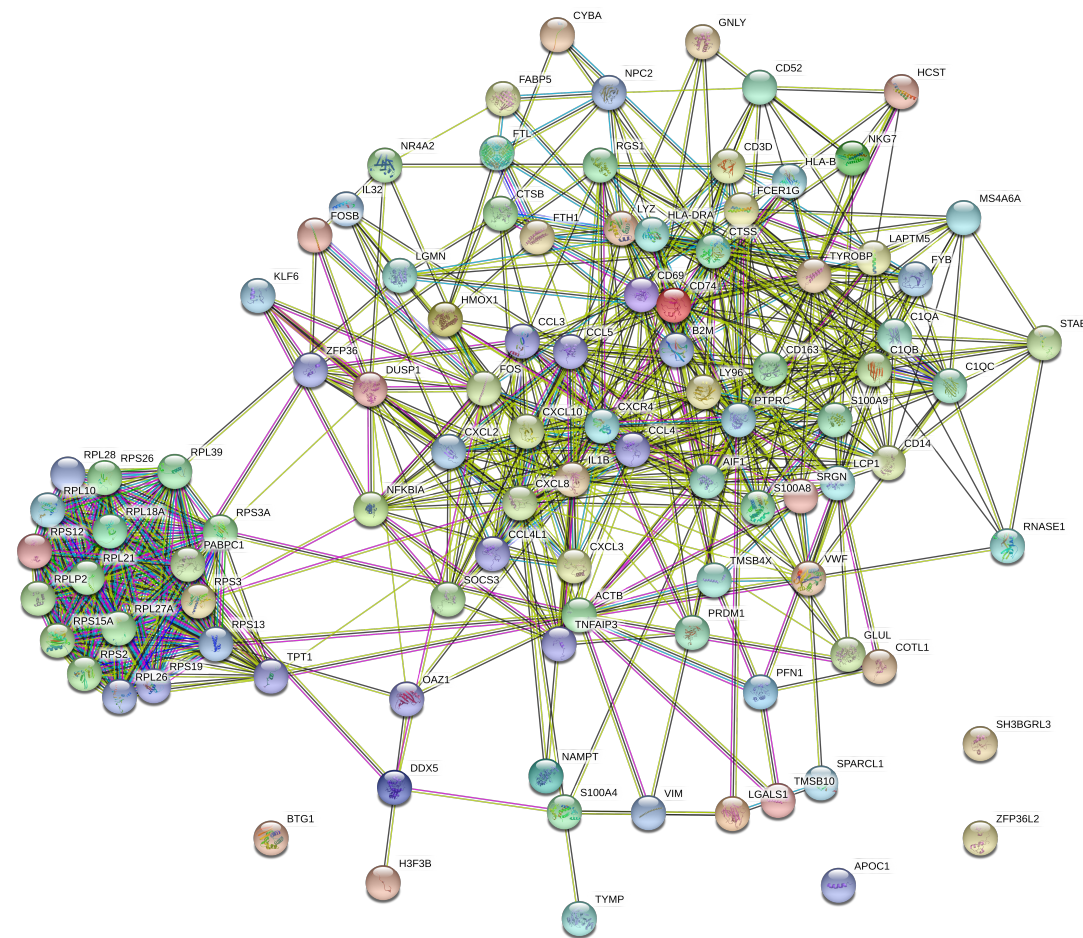

| #term ID   | term description                                                    | observed gene count | background gene count | false discovery rate |
|------------|---------------------------------------------------------------------|---------------------|-----------------------|----------------------|
| GO:0002682 | regulation of immune system process                                 | 42                  | 1391                  | 1.34E-19             |
| GO:0002684 | positive regulation of immune system process                        | 36                  | 882                   | 1.34E-19             |
| GO:0006955 | immune response                                                     | 44                  | 1560                  | 1.34E-19             |
| GO:0051707 | response to other organism                                          | 40                  | 1173                  | 1.34E-19             |
| GO:0002376 | immune system process                                               | 52                  | 2370                  | 1.49E-19             |
| GO:0006952 | defense response                                                    | 39                  | 1234                  | 1.07E-18             |
| GO:0000956 | nuclear-transcribed mRNA catabolic process                          | 20                  | 191                   | 1.04E-17             |
| GO:0006614 | SRP-dependent cotranslational protein targeting to membrane         | 16                  | 92                    | 4.28E-17             |
| GO:0000184 | nuclear-transcribed mRNA catabolic process, nonsense-mediated decay | 17                  | 118                   | 4.75E-17             |
| GO:0006413 | translational initiation                                            | 17                  | 142                   | 5.81E-16             |

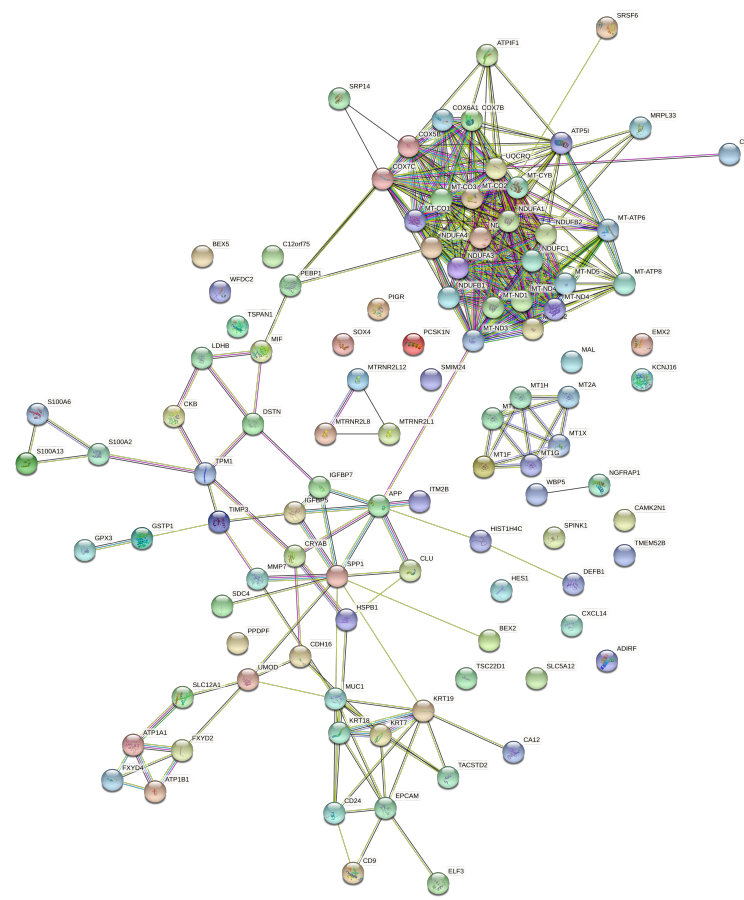

| #term ID   | term description                                       | observed gene count | background gene count | false discovery rate |
|------------|--------------------------------------------------------|---------------------|-----------------------|----------------------|
| GO:0006119 | oxidative phosphorylation                              | 23                  | 100                   | 2.11E-26             |
| GO:0022904 | respiratory electron transport chain                   | 21                  | 96                    | 9.62E-24             |
| GO:0042775 | mitochondrial ATP synthesis coupled electron transport | 20                  | 78                    | 9.62E-24             |
| GO:0046034 | ATP metabolic process                                  | 24                  | 190                   | 8.68E-23             |
| GO:0009205 | purine ribonucleoside triphosphate metabolic process   | 24                  | 221                   | 1.96E-21             |
| GO:0009167 | purine ribonucleoside monophosphate metabolic process  | 24                  | 230                   | 3.13E-21             |
| GO:0022900 | electron transport chain                               | 22                  | 169                   | 3.13E-21             |
| GO:0006091 | generation of precursor metabolites and energy         | 26                  | 400                   | 1.44E-18             |
| GO:0006120 | mitochondrial electron transport, NADH to ubiquinone   | 13                  | 44                    | 2.89E-16             |
| GO:0009150 | purine ribonucleotide metabolic process                | 24                  | 425                   | 9.84E-16             |

# Supplementary Figure S7

A

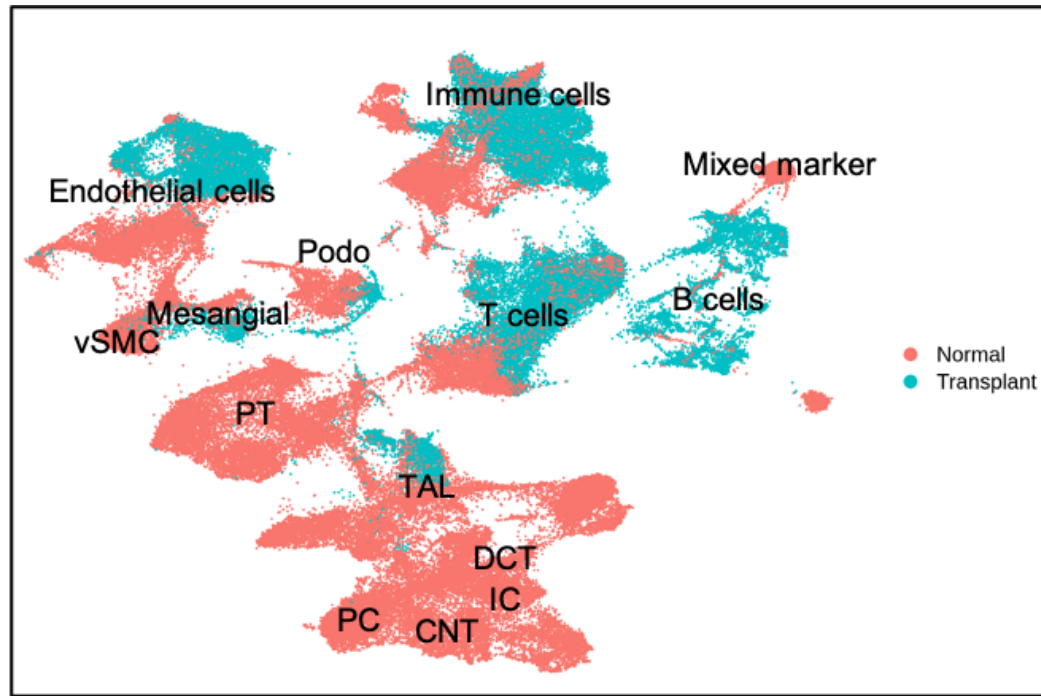

B

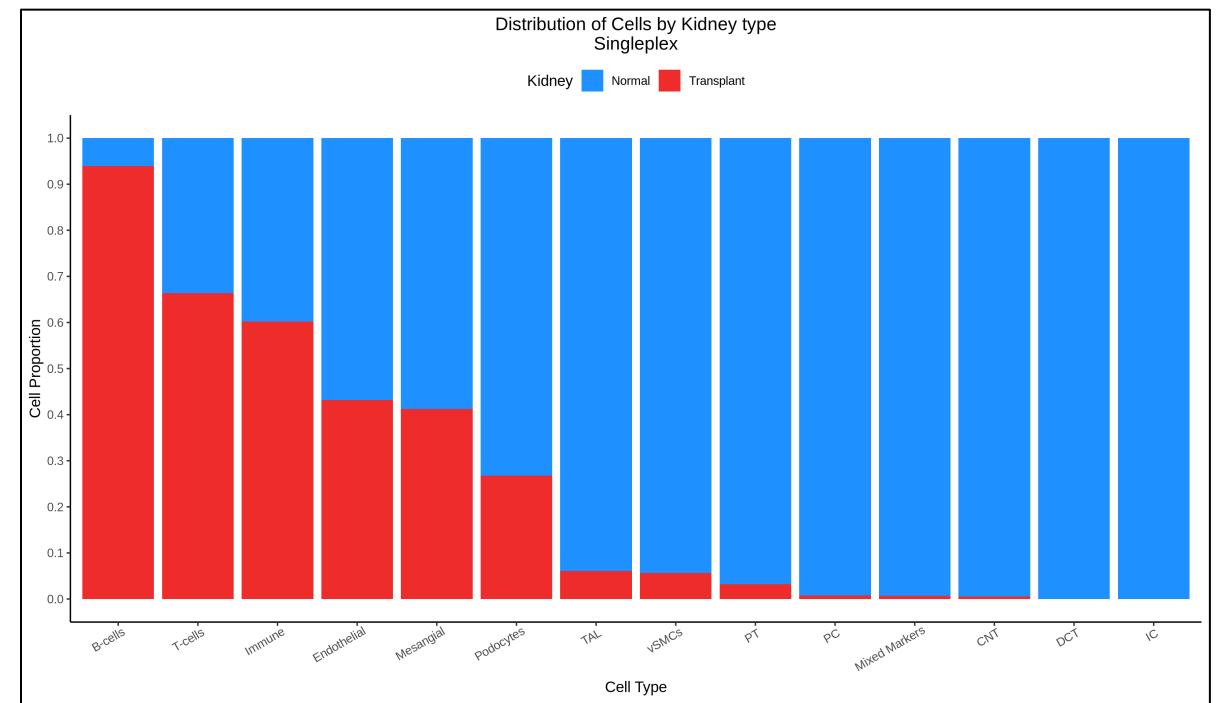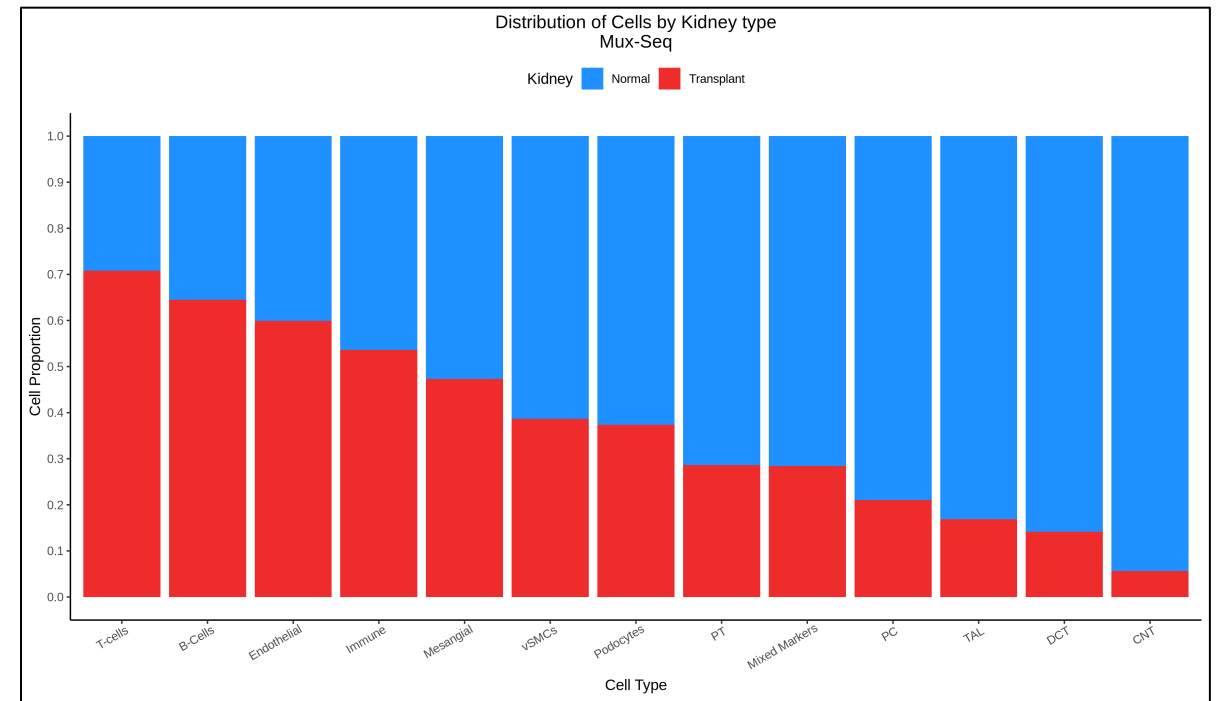



# Supplementary Figure S8

## A

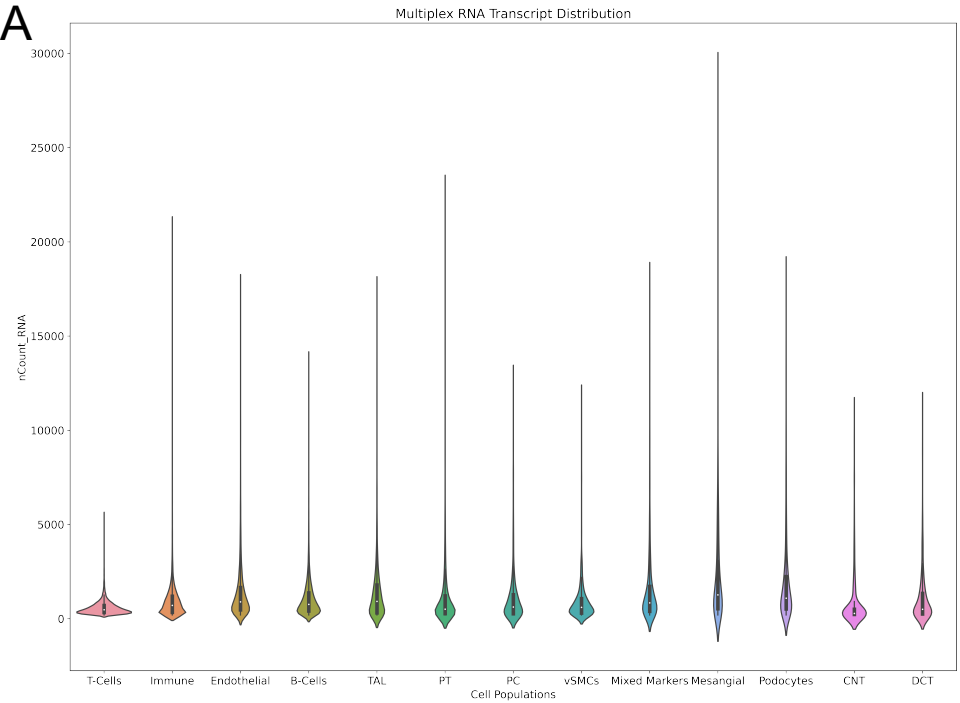

## B

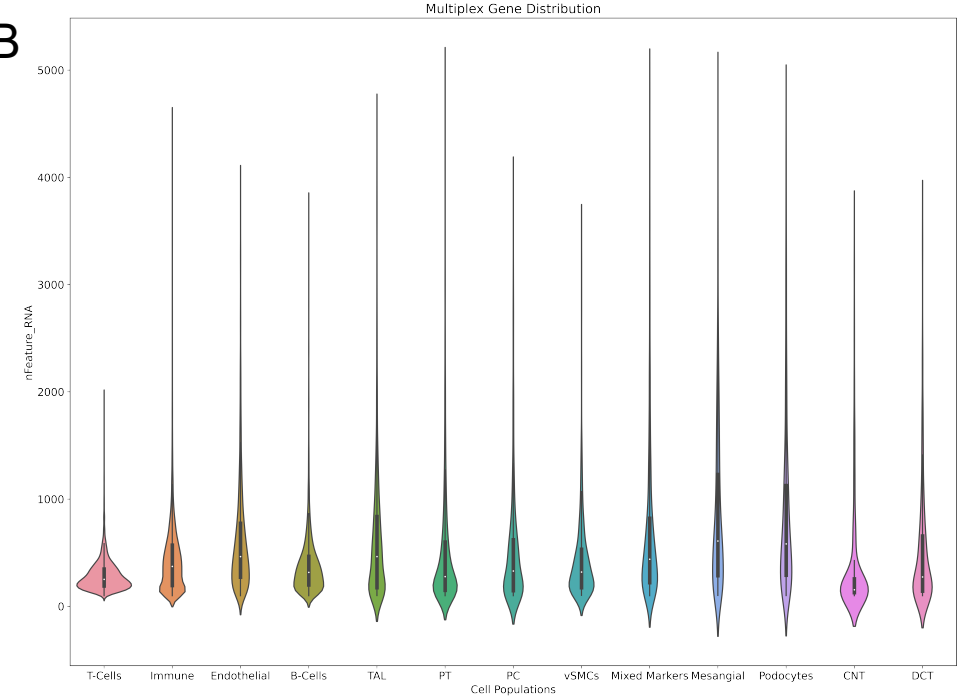

## C

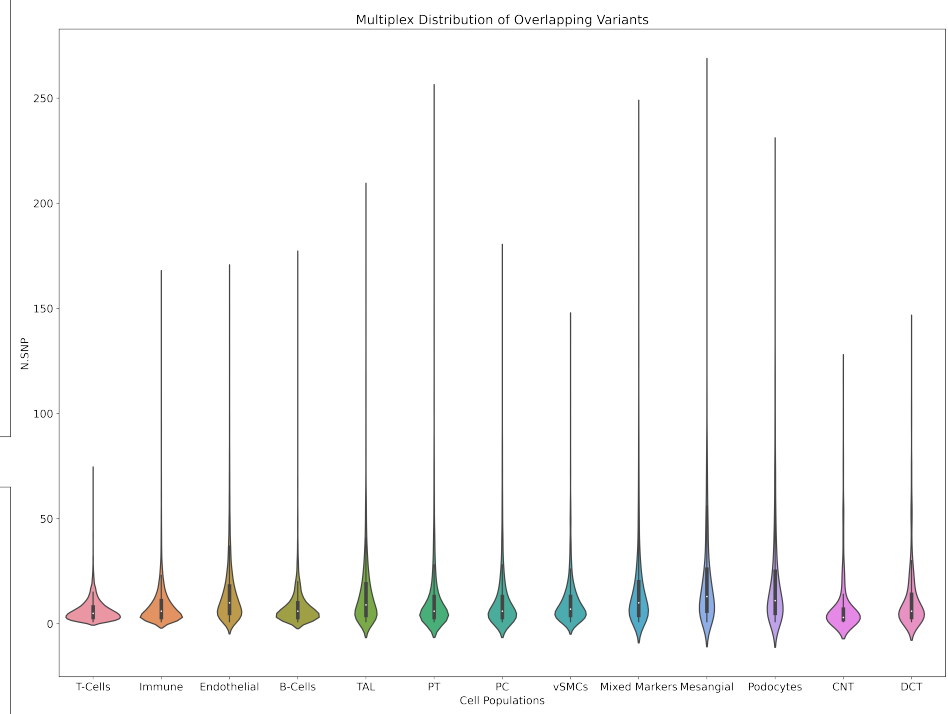

# Supplementary Figure S9

## A

Singleplex RNA Transcript Distribution

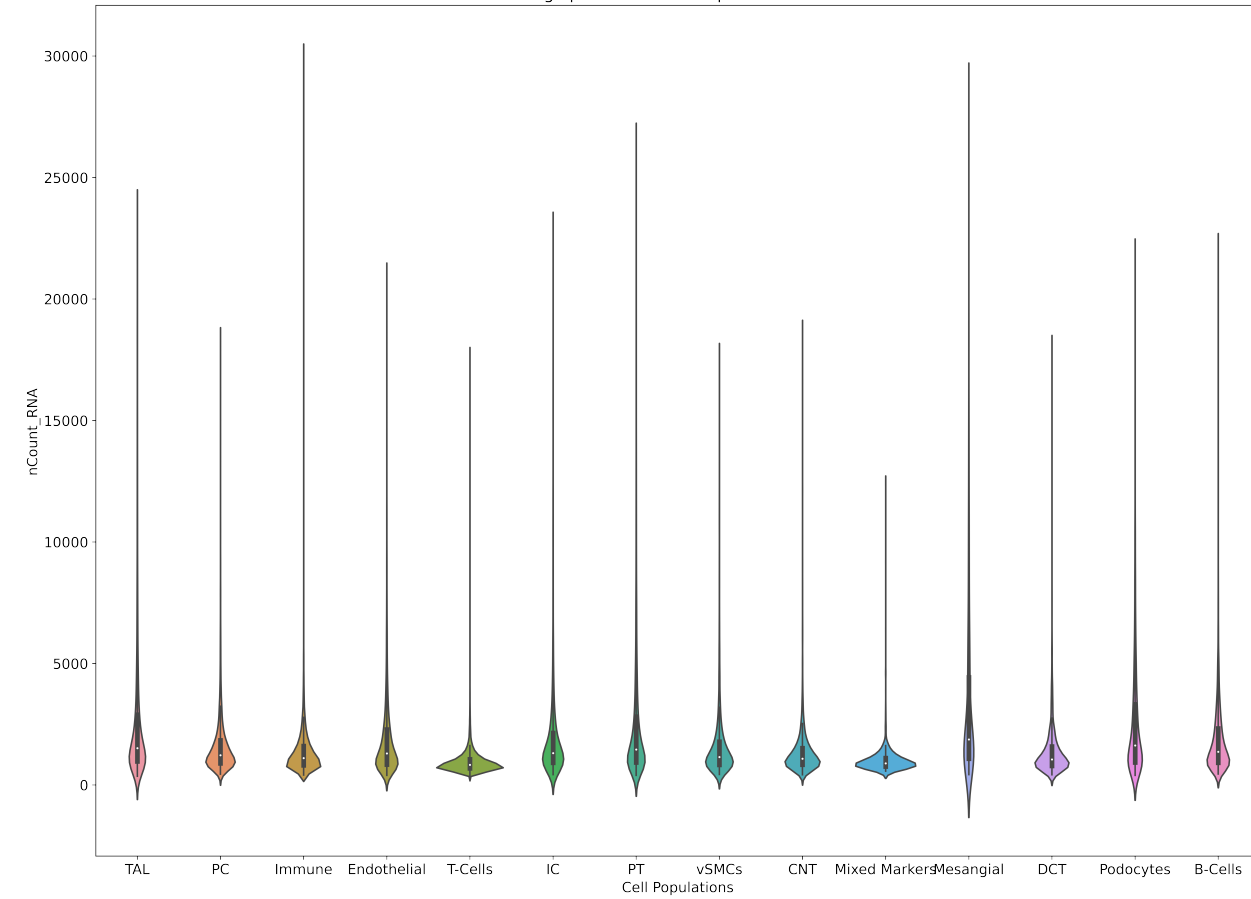

## B

Singleplex Gene Distribution

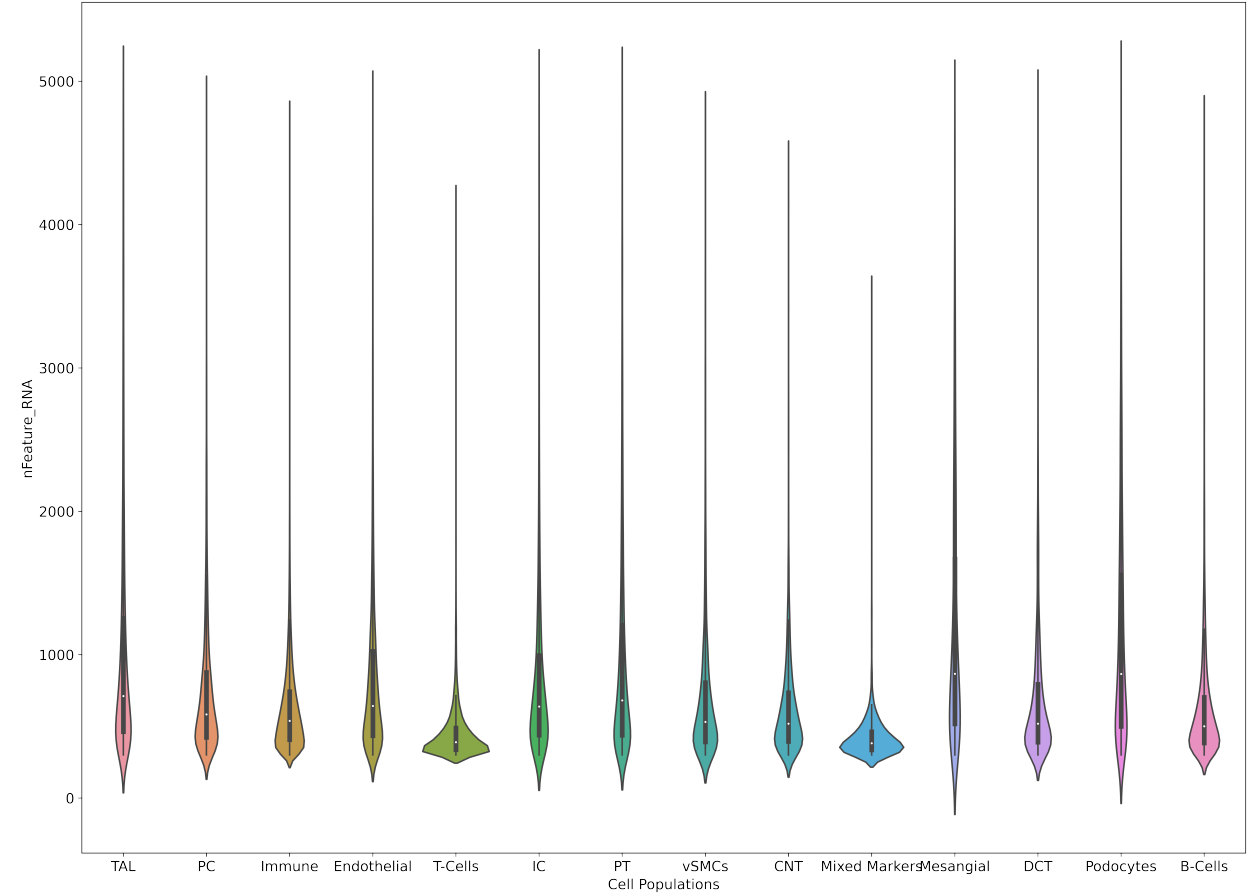

Supplement: NIHMS1750417-supplement-Sf1-9.pdf [file NIHMS1750417-supplement-Sf1-9.pdf]
