# Supplementary material
Source: PubMed Central journal article supplement (PMC8897263)
Supplement: NIHMS1750417-supplement-St1.pdf [file NIHMS1750417-supplement-St1.pdf]

Table S1: Sample metadata.

| Sample ID                           | Tissue Merbidity       | AGE | GENDER | Viability (%) | Input (No of cells) | Mean Reads per Cell | Median Genes per Cell | Number of Reads | Valid Barcodes | Sequencing Saturation | Q30 Bases in Barcode | Q30 Bases in RNA Read | Q30 Bases in Sample Index | Q30 Bases in UMI | Reads Mapped to Genome | Reads Mapped Confidently to Genome | Reads Mapped Confidently to Intergenic Regions | Reads Mapped Confidently to Intronic Regions | Reads Mapped Confidently to Exonic Regions | Reads Mapped Confidently to Transcripts | Reads Mapped Antisense to Gene | Fraction Reads in Cells | Total Genes Detected | Median UMI Counts per Cell |  |
|-------------------------------------|------------------------|-----|--------|---------------|---------------------|---------------------|-----------------------|-----------------|----------------|-----------------------|----------------------|-----------------------|---------------------------|------------------|------------------------|------------------------------------|------------------------------------------------|----------------------------------------------|--------------------------------------------|-----------------------------------------|--------------------------------|-------------------------|----------------------|----------------------------|--|
| <b>Singleplex samples</b>           |                        |     |        |               |                     |                     |                       |                 |                |                       |                      |                       |                           |                  |                        |                                    |                                                |                                              |                                            |                                         |                                |                         |                      |                            |  |
| 2582                                | Transplant Nephrectomy | 28  | F      | 80            | 20,000              | 69,381              | 1,279                 | 434,053,263     | 96.40%         | 65.10%                | 95.70%               | 88.00%                | 94.80%                    | 95.70%           | 84.00%                 | 78.00%                             | 4.80%                                          | 25.70%                                       | 47.50%                                     | 44.60%                                  | 1.20%                          | 46.20%                  | 22,546               | 3,420                      |  |
| 2584                                | Transplant Nephrectomy | 31  | M      | 79            | 20,000              | 61,260              | 696                   | 391,638,256     | 96.30%         | 83.80%                | 95.80%               | 88.20%                | 94.80%                    | 95.70%           | 84.70%                 | 79.90%                             | 4.40%                                          | 25.00%                                       | 50.50%                                     | 47.70%                                  | 1.30%                          | 44.70%                  | 20,700               | 1,474                      |  |
| 2585                                | Native Nephrectomy     | 57  | M      | 73            | 10,000              | 44,344              | 529                   | 440,207,021     | 97.00%         | 76.30%                | 95.80%               | 87.80%                | 93.00%                    | 95.80%           | 84.90%                 | 80.90%                             | 5.20%                                          | 22.00%                                       | 53.70%                                     | 50.80%                                  | 1.60%                          | 35.90%                  | 22,113               | 1,427                      |  |
| 2586                                | Native Nephrectomy     | 59  | F      | 65            | 20,000              | 73,231              | 1,378                 | 383,734,189     | 96.60%         | 69.50%                | 95.70%               | 87.80%                | 93.10%                    | 95.70%           | 83.60%                 | 79.20%                             | 4.90%                                          | 22.60%                                       | 51.80%                                     | 48.60%                                  | 1.30%                          | 40.50%                  | 23,175               | 3,023                      |  |
| 18-142-6                            | Native Nephrectomy     | 68  | F      | 45            | 10,000              | 29,537              | 352                   | 409,886,274     | 96.90%         | 84.30%                | 95.70%               | 88.40%                | 90.60%                    | 95.60%           | 83.10%                 | 77.60%                             | 4.60%                                          | 20.60%                                       | 52.40%                                     | 50.10%                                  | 0.90%                          | 47.90%                  | 21,719               | 825                        |  |
| 18-162-6                            | Native Nephrectomy     | 64  | F      | 45            | 5,000               | 9,076               | 31                    | 351,605,116     | 97.10%         | 92.10%                | 96.00%               | 88.60%                | 90.70%                    | 95.90%           | 85.90%                 | 83.00%                             | 7.20%                                          | 8.10%                                        | 67.80%                                     | 65.80%                                  | 0.70%                          | 70.20%                  | 19,526               | 250                        |  |
| 18-312-6                            | Native Nephrectomy     | 71  | M      | 50            | 6,000               | 109,163             | 2,360                 | 402,268,141     | 96.80%         | 68.20%                | 95.90%               | 88.00%                | 93.50%                    | 95.80%           | 86.30%                 | 83.20%                             | 5.10%                                          | 24.10%                                       | 54.00%                                     | 51.00%                                  | 1.10%                          | 55.90%                  | 23,425               | 6,873                      |  |
| 18-342-6                            | Native Nephrectomy     | 69  | M      | 50            | 20,000              | 50,277              | 595                   | 437,310,416     | 96.80%         | 81.80%                | 95.80%               | 88.50%                | 92.10%                    | 95.70%           | 83.80%                 | 79.40%                             | 5.40%                                          | 21.60%                                       | 52.40%                                     | 49.10%                                  | 1.60%                          | 40.70%                  | 22,042               | 1,170                      |  |
| <b>Mux-Seq Samples</b>              |                        |     |        |               |                     |                     |                       |                 |                |                       |                      |                       |                           |                  |                        |                                    |                                                |                                              |                                            |                                         |                                |                         |                      |                            |  |
| <b>Pool 1</b>                       |                        |     |        |               |                     |                     |                       |                 |                |                       |                      |                       |                           |                  |                        |                                    |                                                |                                              |                                            |                                         |                                |                         |                      |                            |  |
| 2582                                | Transplant Nephrectomy | 28  | F      | 80            | 5,000               |                     |                       |                 |                |                       |                      |                       |                           |                  |                        |                                    |                                                |                                              |                                            |                                         |                                |                         |                      |                            |  |
| 2584                                | Transplant Nephrectomy | 31  | M      | 79            | 5,000               |                     |                       |                 |                |                       |                      |                       |                           |                  |                        |                                    |                                                |                                              |                                            |                                         |                                |                         |                      |                            |  |
| 2585                                | Native Nephrectomy     | 57  | M      | 73            | 5,000               |                     |                       |                 |                |                       |                      |                       |                           |                  |                        |                                    |                                                |                                              |                                            |                                         |                                |                         |                      |                            |  |
| 2586                                | Native Nephrectomy     | 59  | F      | 65            | 5,000               |                     |                       |                 |                |                       |                      |                       |                           |                  |                        |                                    |                                                |                                              |                                            |                                         |                                |                         |                      |                            |  |
|                                     |                        |     |        |               |                     | 118,671             | 1,208                 | 403,600,677     | 96.70%         | 76.90%                | 95.60%               | 87.90%                | 93.40%                    | 95.50%           | 84.40%                 | 79.80%                             | 4.80%                                          | 24.60%                                       | 50.30%                                     | 47.30%                                  | 1.40%                          | 33.20%                  | 22,280               | 2,732                      |  |
| <b>Pool 2 (replicate of Pool 1)</b> |                        |     |        |               |                     |                     |                       |                 |                |                       |                      |                       |                           |                  |                        |                                    |                                                |                                              |                                            |                                         |                                |                         |                      |                            |  |
| 2582                                | Transplant Nephrectomy | 28  | F      | 80            | 5,000               |                     |                       |                 |                |                       |                      |                       |                           |                  |                        |                                    |                                                |                                              |                                            |                                         |                                |                         |                      |                            |  |
| 2584                                | Transplant Nephrectomy | 31  | M      | 79            | 5,000               |                     |                       |                 |                |                       |                      |                       |                           |                  |                        |                                    |                                                |                                              |                                            |                                         |                                |                         |                      |                            |  |
| 2585                                | Native Nephrectomy     | 57  | M      | 73            | 5,000               |                     |                       |                 |                |                       |                      |                       |                           |                  |                        |                                    |                                                |                                              |                                            |                                         |                                |                         |                      |                            |  |
| 2586                                | Native Nephrectomy     | 59  | F      | 65            | 5,000               |                     |                       |                 |                |                       |                      |                       |                           |                  |                        |                                    |                                                |                                              |                                            |                                         |                                |                         |                      |                            |  |
|                                     |                        |     |        |               |                     | 97,055              | 1,235                 | 407,048,749     | 96.70%         | 73.40%                | 95.80%               | 88.50%                | 90.60%                    | 95.70%           | 85.30%                 | 80.80%                             | 4.80%                                          | 23.80%                                       | 52.30%                                     | 49.30%                                  | 1.30%                          | 34.90%                  | 22,938               | 2,964                      |  |
| <b>Pool 3</b>                       |                        |     |        |               |                     |                     |                       |                 |                |                       |                      |                       |                           |                  |                        |                                    |                                                |                                              |                                            |                                         |                                |                         |                      |                            |  |
| 18-142-6                            | Native Nephrectomy     | 68  | F      | 45            | 5,000               |                     |                       |                 |                |                       |                      |                       |                           |                  |                        |                                    |                                                |                                              |                                            |                                         |                                |                         |                      |                            |  |
| 18-162-6                            | Native Nephrectomy     | 64  | F      | 45            | 5,000               |                     |                       |                 |                |                       |                      |                       |                           |                  |                        |                                    |                                                |                                              |                                            |                                         |                                |                         |                      |                            |  |
| 18-312-6                            | Native Nephrectomy     | 71  | M      | 50            | 5,000               |                     |                       |                 |                |                       |                      |                       |                           |                  |                        |                                    |                                                |                                              |                                            |                                         |                                |                         |                      |                            |  |
| 18-342-6                            | Native Nephrectomy     | 69  | M      | 50            | 5,000               |                     |                       |                 |                |                       |                      |                       |                           |                  |                        |                                    |                                                |                                              |                                            |                                         |                                |                         |                      |                            |  |
|                                     |                        |     |        |               |                     | 7,104               | 90                    | 390,919,835     | 94.30%         | 92.70%                | 95.90%               | 91.80%                | 94.60%                    | 95.80%           | 90.10%                 | 84.30%                             | 8.40%                                          | 18.00%                                       | 57.80%                                     | 54.00%                                  | 1.70%                          | 75.00%                  | 20,851               | 155                        |  |
