# Supplementary material
Source: PubMed Central journal article supplement (PMC8897263)
Supplement: NIHMS1750417-supplement-St2.pdf [file NIHMS1750417-supplement-St2.pdf]

Table S2. Cluster markers for Singleplex and Mux-Seq. A list of established markers used for cell type annotation is provided.

## Singleplex scRNAseq markers

| p_val | avg_logFC  | pct.1 | pct.2 | p_val_adj | cluster | Gene     | Cell type          |
|-------|------------|-------|-------|-----------|---------|----------|--------------------|
| 0     | 1.04412713 | 0.283 | 0.019 | 0         | 0       | CXCL10   | Immune/Neutrophils |
| 0     | 1.37443214 | 0.74  | 0.07  | 0         | 0       | C1QA     | Immune/Neutrophils |
| 0     | 1.16295402 | 0.676 | 0.056 | 0         | 0       | C1QB     | Immune/Neutrophils |
| 0     | 0.61068849 | 0.265 | 0.013 | 0         | 0       | CXCL9    | Immune/Neutrophils |
| 0     | 1.16566608 | 0.513 | 0.055 | 0         | 0       | APOC1    | Immune/Neutrophils |
| 0     | 0.62025894 | 0.496 | 0.032 | 0         | 0       | C1QC     | Immune/Neutrophils |
| 0     | 0.63966909 | 0.529 | 0.039 | 0         | 0       | CD163    | Immune/Neutrophils |
| 0     | 0.74647874 | 0.413 | 0.038 | 0         | 0       | HMOX1    | Immune/Neutrophils |
| 0     | 0.41623587 | 0.159 | 0.009 | 0         | 0       | CCL8     | Immune/Neutrophils |
| 0     | 0.39412872 | 0.356 | 0.024 | 0         | 0       | MS4A4A   | Immune/Neutrophils |
| 0     | 0.6794586  | 0.582 | 0.069 | 0         | 0       | MS4A6A   | Immune/Neutrophils |
| 0     | 0.92931626 | 0.722 | 0.118 | 0         | 0       | FCER1G   | Immune/Neutrophils |
| 0     | 0.67868756 | 0.485 | 0.059 | 0         | 0       | LGMMN    | Immune/Neutrophils |
| 0     | 0.94142551 | 0.687 | 0.123 | 0         | 0       | CTSB     | Immune/Neutrophils |
| 0     | 0.97021397 | 0.643 | 0.119 | 0         | 0       | LYZ      | Immune/Neutrophils |
| 0     | 0.48740378 | 0.457 | 0.043 | 0         | 0       | FCGR3A   | Immune/Neutrophils |
| 0     | 0.33202474 | 0.315 | 0.021 | 0         | 0       | FPR3     | Immune/Neutrophils |
| 0     | 0.95269071 | 0.775 | 0.152 | 0         | 0       | TYROBP   | Immune/Neutrophils |
| 0     | 0.44947544 | 0.409 | 0.039 | 0         | 0       | CD14     | Immune/Neutrophils |
| 0     | 0.77723988 | 0.675 | 0.114 | 0         | 0       | CTSS     | Immune/Neutrophils |
| 0     | 0.65067296 | 0.349 | 0.051 | 0         | 0       | CXCL8    | Immune/Neutrophils |
| 0     | 0.64398685 | 0.544 | 0.084 | 0         | 0       | CTSZ     | Immune/Neutrophils |
| 0     | 0.39803615 | 0.358 | 0.035 | 0         | 0       | MSR1     | Immune/Neutrophils |
| 0     | 0.30550002 | 0.236 | 0.018 | 0         | 0       | F13A1    | Immune/Neutrophils |
| 0     | 1.1400662  | 0.554 | 0.162 | 0         | 0       | APOE     | Immune/Neutrophils |
| 0     | 1.4308107  | 0.915 | 0.336 | 0         | 0       | HLA-DRA  | Immune/Neutrophils |
| 0     | 0.31627795 | 0.27  | 0.022 | 0         | 0       | PLTP     | Immune/Neutrophils |
| 0     | 0.8039128  | 0.553 | 0.116 | 0         | 0       | RNASE1   | Immune/Neutrophils |
| 0     | 0.56154332 | 0.337 | 0.05  | 0         | 0       | CXCL3    | Immune/Neutrophils |
| 0     | 0.7886614  | 0.729 | 0.156 | 0         | 0       | AIF1     | Immune/Neutrophils |
| 0     | 0.41835017 | 0.388 | 0.045 | 0         | 0       | STAB1    | Immune/Neutrophils |
| 0     | 0.39550208 | 0.386 | 0.044 | 0         | 0       | CYBB     | Immune/Neutrophils |
| 0     | 0.36527576 | 0.331 | 0.035 | 0         | 0       | CFD      | Immune/Neutrophils |
| 0     | 0.32175646 | 0.283 | 0.027 | 0         | 0       | SDC3     | Immune/Neutrophils |
| 0     | 0.36870537 | 0.334 | 0.039 | 0         | 0       | FAM26F   | Immune/Neutrophils |
| 0     | 0.55881796 | 0.458 | 0.083 | 0         | 0       | CTSL     | Immune/Neutrophils |
| 0     | 0.53525562 | 0.529 | 0.092 | 0         | 0       | LY96     | Immune/Neutrophils |
| 0     | 0.31174998 | 0.3   | 0.032 | 0         | 0       | TNFSF13B | Immune/Neutrophils |
| 0     | 0.71769083 | 0.49  | 0.121 | 0         | 0       | CXCL2    | Immune/Neutrophils |
| 0     | 0.47372671 | 0.28  | 0.046 | 0         | 0       | C15orf48 | Immune/Neutrophils |
| 0     | 0.73186092 | 0.654 | 0.167 | 0         | 0       | GLUL     | Immune/Neutrophils |
| 0     | 0.36453547 | 0.36  | 0.046 | 0         | 0       | MS4A7    | Immune/Neutrophils |

|   |            |       |       |   |   |          |                    |
|---|------------|-------|-------|---|---|----------|--------------------|
| 0 | 0.58414886 | 0.439 | 0.097 | 0 | 0 | CCL3     | Immune/Neutrophils |
| 0 | 0.47817175 | 0.468 | 0.085 | 0 | 0 | MAFB     | Immune/Neutrophils |
| 0 | 0.4179343  | 0.39  | 0.063 | 0 | 0 | LIPA     | Immune/Neutrophils |
| 0 | 0.48980492 | 0.393 | 0.076 | 0 | 0 | RP11-114 | Immune/Neutrophils |
| 0 | 0.47559452 | 0.487 | 0.092 | 0 | 0 | LAPTM5   | Immune/Neutrophils |
| 0 | 0.41739062 | 0.411 | 0.069 | 0 | 0 | S100A9   | Immune/Neutrophils |
| 0 | 0.861195   | 0.793 | 0.279 | 0 | 0 | NPC2     | Immune/Neutrophils |
| 0 | 0.26508328 | 0.277 | 0.03  | 0 | 0 | CD68     | Immune/Neutrophils |
| 0 | 0.6912718  | 0.703 | 0.2   | 0 | 0 | HLA-DPB1 | Immune/Neutrophils |
| 0 | 0.89506756 | 0.774 | 0.305 | 0 | 0 | PSAP     | Immune/Neutrophils |
| 0 | 0.34212426 | 0.323 | 0.049 | 0 | 0 | PLEK     | Immune/Neutrophils |
| 0 | 0.52409447 | 0.374 | 0.088 | 0 | 0 | FABP5    | Immune/Neutrophils |
| 0 | 1.73942828 | 0.979 | 0.773 | 0 | 0 | FTL      | Immune/Neutrophils |
| 0 | 0.53967553 | 0.558 | 0.138 | 0 | 0 | MARCKS   | Immune/Neutrophils |
| 0 | 0.61648917 | 0.617 | 0.179 | 0 | 0 | HLA-DPA1 | Immune/Neutrophils |
| 0 | 0.66944332 | 0.286 | 0.091 | 0 | 0 | CCL2     | Immune/Neutrophils |
| 0 | 0.48614616 | 0.47  | 0.115 | 0 | 0 | CTSC     | Immune/Neutrophils |
| 0 | 0.96114328 | 0.883 | 0.43  | 0 | 0 | CD74     | Immune/Neutrophils |
| 0 | 0.46997772 | 0.487 | 0.116 | 0 | 0 | GRN      | Immune/Neutrophils |
| 0 | 0.32199901 | 0.275 | 0.045 | 0 | 0 | GPNMB    | Immune/Neutrophils |
| 0 | 0.34138312 | 0.281 | 0.049 | 0 | 0 | GBP1     | Immune/Neutrophils |
| 0 | 0.72252863 | 0.785 | 0.296 | 0 | 0 | SRGN     | Immune/Neutrophils |
| 0 | 0.43224339 | 0.466 | 0.107 | 0 | 0 | TYMP     | Immune/Neutrophils |
| 0 | 0.28284791 | 0.304 | 0.046 | 0 | 0 | CREG1    | Immune/Neutrophils |
| 0 | 0.47687841 | 0.472 | 0.134 | 0 | 0 | NR4A2    | Immune/Neutrophils |
| 0 | 0.29716427 | 0.339 | 0.06  | 0 | 0 | MFSD1    | Immune/Neutrophils |
| 0 | 0.29837898 | 0.328 | 0.059 | 0 | 0 | MNDA     | Immune/Neutrophils |
| 0 | 0.32610061 | 0.35  | 0.069 | 0 | 0 | CD83     | Immune/Neutrophils |
| 0 | 0.31011203 | 0.233 | 0.044 | 0 | 0 | CCL3L3   | Immune/Neutrophils |
| 0 | 0.73243985 | 0.683 | 0.305 | 0 | 0 | CTSD     | Immune/Neutrophils |
| 0 | 0.46664243 | 0.512 | 0.149 | 0 | 0 | NAMPT    | Immune/Neutrophils |
| 0 | 0.34435646 | 0.242 | 0.056 | 0 | 0 | SLC40A1  | Immune/Neutrophils |
| 0 | 0.26888236 | 0.309 | 0.056 | 0 | 0 | C1orf162 | Immune/Neutrophils |
| 0 | 0.31178435 | 0.394 | 0.083 | 0 | 0 | LST1     | Immune/Neutrophils |
| 0 | 0.33618377 | 0.377 | 0.087 | 0 | 0 | HLA-DQA1 | Immune/Neutrophils |
| 0 | 0.84027277 | 0.918 | 0.549 | 0 | 0 | SAT1     | Immune/Neutrophils |
| 0 | 0.6509176  | 0.755 | 0.353 | 0 | 0 | CYBA     | Immune/Neutrophils |
| 0 | 0.40818219 | 0.436 | 0.131 | 0 | 0 | STAT1    | Immune/Neutrophils |
| 0 | 0.58567214 | 0.677 | 0.292 | 0 | 0 | GPX1     | Immune/Neutrophils |
| 0 | 0.45459357 | 0.551 | 0.193 | 0 | 0 | SDCBP    | Immune/Neutrophils |
| 0 | 0.27654377 | 0.336 | 0.072 | 0 | 0 | CD53     | Immune/Neutrophils |
| 0 | 0.29868709 | 0.348 | 0.081 | 0 | 0 | LAP3     | Immune/Neutrophils |
| 0 | 0.30453357 | 0.214 | 0.051 | 0 | 0 | CCL4L2   | Immune/Neutrophils |
| 0 | 0.47235565 | 0.476 | 0.181 | 0 | 0 | IER3     | Immune/Neutrophils |
| 0 | 0.6234388  | 0.78  | 0.402 | 0 | 0 | CST3     | Immune/Neutrophils |
| 0 | 0.4566755  | 0.531 | 0.21  | 0 | 0 | SOD2     | Immune/Neutrophils |
| 0 | 0.4566755  | 0.531 | 0.21  | 0 | 0 | SOD2     | Immune/Neutrophils |
| 0 | 0.50674521 | 0.38  | 0.167 | 0 | 0 | SEPP1    | Immune/Neutrophils |

|           |            |       |       |        |   |          |                    |
|-----------|------------|-------|-------|--------|---|----------|--------------------|
| 0         | 0.33622036 | 0.382 | 0.114 | 0      | 0 | RGS2     | Immune/Neutrophils |
| 0         | 0.52417518 | 0.592 | 0.277 | 0      | 0 | NFKBIA   | Immune/Neutrophils |
| 0         | 0.40739377 | 0.453 | 0.171 | 0      | 0 | SGK1     | Immune/Neutrophils |
| 0         | 0.65831631 | 0.809 | 0.497 | 0      | 0 | DUSP1    | Immune/Neutrophils |
| 0         | 0.36667142 | 0.45  | 0.155 | 0      | 0 | HLA-DRB5 | Immune/Neutrophils |
| 0         | 0.31054333 | 0.399 | 0.117 | 0      | 0 | FYB      | Immune/Neutrophils |
| 0         | 0.25396046 | 0.268 | 0.067 | 0      | 0 | SNX10    | Immune/Neutrophils |
| 0         | 0.32026923 | 0.368 | 0.117 | 0      | 0 | KLF4     | Immune/Neutrophils |
| 0         | 0.25917722 | 0.329 | 0.085 | 0      | 0 | LCP1     | Immune/Neutrophils |
| 0         | 0.27466698 | 0.359 | 0.1   | 0      | 0 | HLA-DMA  | Immune/Neutrophils |
| 0         | 0.70428863 | 0.923 | 0.665 | 0      | 0 | FOS      | Immune/Neutrophils |
| 0         | 0.79884583 | 0.96  | 0.789 | 0      | 0 | FTH1     | Immune/Neutrophils |
| 0         | 0.48931575 | 0.682 | 0.358 | 0      | 0 | ZFP36    | Immune/Neutrophils |
| 0         | 0.47134139 | 0.666 | 0.346 | 0      | 0 | LGALS1   | Immune/Neutrophils |
| 0         | 0.34467861 | 0.508 | 0.201 | 0      | 0 | HLA-DRB1 | Immune/Neutrophils |
| 0         | 0.30261308 | 0.404 | 0.141 | 0      | 0 | ASAH1    | Immune/Neutrophils |
| 0         | 0.69540967 | 0.963 | 0.822 | 0      | 0 | ACTB     | Immune/Neutrophils |
| 0         | 0.4831467  | 0.689 | 0.412 | 0      | 0 | KLF6     | Immune/Neutrophils |
| 0         | 0.42353731 | 0.66  | 0.355 | 0      | 0 | OAZ1     | Immune/Neutrophils |
| 0         | 0.681228   | 0.988 | 0.879 | 0      | 0 | TMSB4X   | Immune/Neutrophils |
| 0         | 0.39518521 | 0.605 | 0.316 | 0      | 0 | SH3BGR1  | Immune/Neutrophils |
| 0         | 0.27068808 | 0.394 | 0.141 | 0      | 0 | COTL1    | Immune/Neutrophils |
| 0         | 0.28727043 | 0.43  | 0.164 | 0      | 0 | ARPC5    | Immune/Neutrophils |
| 0         | 0.39096991 | 0.651 | 0.345 | 0      | 0 | VIM      | Immune/Neutrophils |
| 0         | 0.70463855 | 0.989 | 0.947 | 0      | 0 | B2M      | Immune/Neutrophils |
| 0         | 0.26402036 | 0.373 | 0.135 | 0      | 0 | CMTM6    | Immune/Neutrophils |
| 0         | 0.32997947 | 0.482 | 0.219 | 0      | 0 | VAMP8    | Immune/Neutrophils |
| 0         | 0.26153285 | 0.352 | 0.127 | 0      | 0 | CEBPB    | Immune/Neutrophils |
| 0         | 0.25073427 | 0.367 | 0.13  | 0      | 0 | HCST     | Immune/Neutrophils |
| 0         | 0.60399695 | 0.979 | 0.85  | 0      | 0 | TMSB10   | Immune/Neutrophils |
| 0         | 0.38787277 | 0.617 | 0.352 | 0      | 0 | POMP     | Immune/Neutrophils |
| 0         | 0.45286414 | 0.673 | 0.451 | 0      | 0 | HSPA1A   | Immune/Neutrophils |
| 0         | 0.37752916 | 0.602 | 0.353 | 0      | 0 | FOSB     | Immune/Neutrophils |
| 0         | 0.39211679 | 0.624 | 0.385 | 0      | 0 | ZFP36L1  | Immune/Neutrophils |
| 0         | 0.25199698 | 0.264 | 0.106 | 0      | 0 | ISG15    | Immune/Neutrophils |
| 0         | 0.26541209 | 0.369 | 0.162 | 0      | 0 | VAMP5    | Immune/Neutrophils |
| 0         | 0.38678793 | 0.759 | 0.506 | 0      | 0 | HLA-B    | Immune/Neutrophils |
| 0         | 0.33982017 | 0.489 | 0.292 | 0      | 0 | PRDX1    | Immune/Neutrophils |
| 0         | 0.36999656 | 0.583 | 0.385 | 0      | 0 | EGR1     | Immune/Neutrophils |
| 0         | 0.28620886 | 0.519 | 0.275 | 0      | 0 | HLA-E    | Immune/Neutrophils |
| 0         | 0.27123221 | 0.521 | 0.284 | 0      | 0 | S100A4   | Immune/Neutrophils |
| 0         | 0.25459425 | 0.463 | 0.252 | 0      | 0 | MCL1     | Immune/Neutrophils |
| 0         | 0.26004292 | 0.492 | 0.277 | 0      | 0 | RHOA     | Immune/Neutrophils |
| 0         | 0.29706885 | 0.672 | 0.461 | 0      | 0 | PFN1     | Immune/Neutrophils |
| 0         | 0.36522903 | 0.95  | 0.854 | 0      | 0 | NEAT1    | Immune/Neutrophils |
| 0         | 0.27506749 | 0.644 | 0.443 | 0      | 0 | HLA-A    | Immune/Neutrophils |
| 4.86E-260 | 0.26284919 | 0.581 | 0.412 | 1E-255 | 0 | CD63     | Immune/Neutrophils |
| 0         | 0.29997667 | 0.881 | 0.771 | 0      | 0 | ATP5E    | Immune/Neutrophils |

|           |            |       |       |         |   |         |                    |
|-----------|------------|-------|-------|---------|---|---------|--------------------|
| 0         | 0.28305038 | 0.902 | 0.795 | 0       | 0 | TPT1    | Immune/Neutrophils |
| 4.01E-264 | -0.339104  | 0.019 | 0.174 | 9E-260  | 0 | CXCL14  | Immune/Neutrophils |
| 8.12E-241 | -0.2624086 | 0.033 | 0.184 | 2E-236  | 0 | TIMP3   | Immune/Neutrophils |
| 4.21E-145 | -0.4621179 | 0.011 | 0.101 | 9E-141  | 0 | UMOD    | Immune/Neutrophils |
| 8.82E-228 | -0.2536958 | 0.043 | 0.192 | 2E-223  | 0 | CALD1   | Immune/Neutrophils |
| 3.64E-209 | -0.322472  | 0.032 | 0.168 | 8E-205  | 0 | MMP7    | Immune/Neutrophils |
| 0         | -0.2668044 | 0.07  | 0.301 | 0       | 0 | NGFRAP1 | Immune/Neutrophils |
| 0         | -0.5663536 | 0.043 | 0.343 | 0       | 0 | FXD2    | Immune/Neutrophils |
| 6.23E-308 | -0.3889745 | 0.042 | 0.229 | 1E-303  | 0 | CRYAB   | Immune/Neutrophils |
| 0         | -0.4813472 | 0.058 | 0.365 | 0       | 0 | CD24    | Immune/Neutrophils |
| 2.03E-234 | -0.492081  | 0.027 | 0.173 | 4E-230  | 0 | IGFBP5  | Immune/Neutrophils |
| 4.39E-242 | -0.5116381 | 0.033 | 0.186 | 1E-237  | 0 | S100A2  | Immune/Neutrophils |
| 1.5E-303  | -0.3896418 | 0.059 | 0.25  | 3E-299  | 0 | MT1E    | Immune/Neutrophils |
| 1.3E-166  | -0.2678194 | 0.078 | 0.208 | 3E-162  | 0 | GPX3    | Immune/Neutrophils |
| 2.19E-156 | -0.3495625 | 0.054 | 0.171 | 5E-152  | 0 | MGP     | Immune/Neutrophils |
| 1.25E-188 | -0.2842205 | 0.105 | 0.256 | 3E-184  | 0 | HES1    | Immune/Neutrophils |
| 0         | -0.5595568 | 0.067 | 0.308 | 0       | 0 | CLU     | Immune/Neutrophils |
| 0         | -0.728569  | 0.056 | 0.322 | 0       | 0 | DEFB1   | Immune/Neutrophils |
| 0         | -0.6961125 | 0.062 | 0.32  | 0       | 0 | ADIRF   | Immune/Neutrophils |
| 0         | -0.7291879 | 0.061 | 0.31  | 0       | 0 | WFDC2   | Immune/Neutrophils |
| 0         | -0.4075814 | 0.158 | 0.443 | 0       | 0 | DSTN    | Immune/Neutrophils |
| 7.3E-260  | -0.2510658 | 0.31  | 0.506 | 2E-255  | 0 | RPL5    | Immune/Neutrophils |
| 0         | -0.7597288 | 0.116 | 0.507 | 0       | 0 | IGFBP7  | Immune/Neutrophils |
| 3.32E-247 | -0.2628265 | 0.412 | 0.588 | 7E-243  | 0 | RPL10A  | Immune/Neutrophils |
| 1.02E-289 | -0.2797283 | 0.486 | 0.671 | 2E-285  | 0 | RPL6    | Immune/Neutrophils |
| 2.78E-267 | -0.3584966 | 0.257 | 0.45  | 6E-263  | 0 | HSPB1   | Immune/Neutrophils |
| 0         | -0.3028078 | 0.491 | 0.686 | 0       | 0 | RPL31   | Immune/Neutrophils |
| 4.66E-248 | -0.271266  | 0.644 | 0.765 | 1E-243  | 0 | RPL35A  | Immune/Neutrophils |
| 6.04E-261 | -0.2707237 | 0.706 | 0.807 | 1E-256  | 0 | RPL11   | Immune/Neutrophils |
| 6.87E-207 | -0.2658972 | 0.808 | 0.863 | 2E-202  | 0 | RPS8    | Immune/Neutrophils |
| 0         | -0.3290834 | 0.55  | 0.727 | 0       | 0 | RPS4X   | Immune/Neutrophils |
| 0         | -0.7996093 | 0.127 | 0.4   | 0       | 0 | ATP1B1  | Immune/Neutrophils |
| 9.25E-184 | -0.2632273 | 0.901 | 0.915 | 2E-179  | 0 | RPL10   | Immune/Neutrophils |
| 0         | -0.3892412 | 0.549 | 0.748 | 0       | 0 | RPL3    | Immune/Neutrophils |
| 3.72E-281 | -0.3043865 | 0.896 | 0.926 | 8E-277  | 0 | RPS18   | Immune/Neutrophils |
| 2.04E-212 | -0.8306261 | 0.093 | 0.252 | 4E-208  | 0 | MT1G    | Immune/Neutrophils |
| 2.83E-141 | -0.344868  | 0.638 | 0.711 | 6E-137  | 0 | S100A6  | Immune/Neutrophils |
| 2.54E-295 | -0.3571927 | 0.728 | 0.811 | 6E-291  | 0 | MT-ND4L | Immune/Neutrophils |
| 0         | -0.3254967 | 0.995 | 0.994 | 0       | 0 | MT-ATP6 | Immune/Neutrophils |
| 0         | -0.3650167 | 0.868 | 0.929 | 0       | 0 | MT-ND5  | Immune/Neutrophils |
| 0         | -0.3432615 | 1     | 1     | 0       | 0 | MT-CO2  | Immune/Neutrophils |
| 0         | -0.4291538 | 0.711 | 0.86  | 0       | 0 | RPS6    | Immune/Neutrophils |
| 0         | -0.359137  | 1     | 1     | 0       | 0 | MT-CO3  | Immune/Neutrophils |
| 0         | -0.3858335 | 1     | 1     | 0       | 0 | MT-CO1  | Immune/Neutrophils |
| 5.214E-64 | -0.5277565 | 0.293 | 0.387 | 1.2E-59 | 0 | SPP1    | Immune/Neutrophils |
| 0         | -0.4154705 | 0.954 | 0.965 | 0       | 0 | MT-ND1  | Immune/Neutrophils |
| 0         | -0.41112   | 1     | 0.999 | 0       | 0 | MT-ND4  | Immune/Neutrophils |
| 0         | -0.449927  | 1     | 0.999 | 0       | 0 | MALAT1  | Immune/Neutrophils |

|           |            |       |       |         |   |        |                    |
|-----------|------------|-------|-------|---------|---|--------|--------------------|
| 0         | -0.4540197 | 0.986 | 0.992 | 0       | 0 | MT-CYB | Immune/Neutrophils |
| 0         | -0.4902533 | 0.989 | 0.996 | 0       | 0 | MT-ND2 | Immune/Neutrophils |
| 0         | -0.5913098 | 0.998 | 0.999 | 0       | 0 | MT-ND3 | Immune/Neutrophils |
| 7.978E-22 | -0.5562598 | 0.117 | 0.081 | 1.8E-17 | 0 | IGHG3  | Immune/Neutrophils |
| 1.231E-20 | -0.5515221 | 0.102 | 0.069 | 2.7E-16 | 0 | IGHG1  | Immune/Neutrophils |
| 9.406E-23 | -1.2312195 | 0.113 | 0.078 | 2.1E-18 | 0 | IGLC3  | Immune/Neutrophils |
| 2.481E-56 | -1.2858112 | 0.144 | 0.086 | 5.5E-52 | 0 | IGLC2  | Immune/Neutrophils |
| 6.97E-136 | -1.613738  | 0.3   | 0.172 | 2E-131  | 0 | IGKC   | Immune/Neutrophils |
| 0         | 0.34390778 | 0.297 | 0.05  | 0       | 1 | LTB    | T Cells            |
| 0         | 0.51566079 | 0.527 | 0.157 | 0       | 1 | CD52   | T Cells            |
| 0         | 0.33733351 | 0.306 | 0.062 | 0       | 1 | IL7R   | T Cells            |
| 0         | 0.47033698 | 0.444 | 0.129 | 0       | 1 | CD69   | T Cells            |
| 0         | 0.31017274 | 0.215 | 0.054 | 0       | 1 | KLRB1  | T Cells            |
| 0         | 0.42931339 | 0.534 | 0.225 | 0       | 1 | CXCR4  | T Cells            |
| 0         | 0.47095828 | 0.642 | 0.378 | 0       | 1 | BTG1   | T Cells            |
| 0         | 0.7311788  | 0.987 | 0.969 | 0       | 1 | RPS27  | T Cells            |
| 0         | 0.6094904  | 0.965 | 0.925 | 0       | 1 | RPS29  | T Cells            |
| 0         | 0.55584521 | 0.93  | 0.816 | 0       | 1 | RPS15A | T Cells            |
| 0         | 0.40872451 | 0.676 | 0.45  | 0       | 1 | PABPC1 | T Cells            |
| 0         | 0.52257875 | 0.92  | 0.825 | 0       | 1 | RPLP2  | T Cells            |
| 0         | 0.54779588 | 0.972 | 0.946 | 0       | 1 | RPL21  | T Cells            |
| 0         | 0.29414282 | 0.452 | 0.242 | 0       | 1 | IL32   | T Cells            |
| 0         | 0.45786002 | 0.878 | 0.743 | 0       | 1 | RPL18A | T Cells            |
| 0         | 0.50535554 | 0.969 | 0.909 | 0       | 1 | RPL13A | T Cells            |
| 0         | 0.424497   | 0.804 | 0.643 | 0       | 1 | RPS3   | T Cells            |
| 0         | 0.50962066 | 0.975 | 0.939 | 0       | 1 | RPL39  | T Cells            |
| 0         | 0.48653376 | 0.962 | 0.898 | 0       | 1 | RPL32  | T Cells            |
| 0         | 0.47372125 | 0.933 | 0.854 | 0       | 1 | RPS8   | T Cells            |
| 0         | 0.44710547 | 0.878 | 0.765 | 0       | 1 | RPL23A | T Cells            |
| 0         | 0.47845484 | 0.971 | 0.916 | 0       | 1 | RPL13  | T Cells            |
| 0         | 0.45665675 | 0.934 | 0.852 | 0       | 1 | RPS12  | T Cells            |
| 0         | 0.46826811 | 0.967 | 0.91  | 0       | 1 | RPL10  | T Cells            |
| 0         | 0.44167715 | 0.888 | 0.789 | 0       | 1 | RPS25  | T Cells            |
| 0         | 0.46070673 | 0.965 | 0.921 | 0       | 1 | RPS18  | T Cells            |
| 0         | 0.42037344 | 0.904 | 0.794 | 0       | 1 | RPL28  | T Cells            |
| 0         | 0.41463225 | 0.888 | 0.794 | 0       | 1 | RPL11  | T Cells            |
| 0         | 0.45841256 | 0.988 | 0.978 | 0       | 1 | RPL34  | T Cells            |
| 0         | 0.35106349 | 0.681 | 0.525 | 0       | 1 | RPL30  | T Cells            |
| 0         | 0.39213839 | 0.841 | 0.728 | 0       | 1 | RPL27A | T Cells            |
| 0         | 0.43298335 | 0.957 | 0.915 | 0       | 1 | RPS27A | T Cells            |
| 0         | 0.37943936 | 0.814 | 0.684 | 0       | 1 | RPS26  | T Cells            |
| 0         | 0.41676909 | 0.961 | 0.889 | 0       | 1 | RPS19  | T Cells            |
| 0         | 0.38817166 | 0.855 | 0.749 | 0       | 1 | RPL35A | T Cells            |
| 0         | 0.38858028 | 0.853 | 0.749 | 0       | 1 | RPS3A  | T Cells            |
| 0         | 0.34764349 | 0.831 | 0.692 | 0       | 1 | RPS2   | T Cells            |
| 0         | 0.35280888 | 0.818 | 0.707 | 0       | 1 | RPS4X  | T Cells            |
| 0         | 0.36681689 | 0.92  | 0.845 | 0       | 1 | RPS6   | T Cells            |
| 0         | 0.35517732 | 0.897 | 0.804 | 0       | 1 | RPL12  | T Cells            |

|           |            |       |       |         |   |         |         |
|-----------|------------|-------|-------|---------|---|---------|---------|
| 0         | 0.37135743 | 0.947 | 0.891 | 0       | 1 | RPS15   | T Cells |
| 2.33E-300 | 0.29857927 | 0.672 | 0.525 | 5E-296  | 1 | RPL14   | T Cells |
| 0         | 0.35383168 | 0.933 | 0.876 | 0       | 1 | RPS14   | T Cells |
| 0         | 0.34814372 | 0.961 | 0.919 | 0       | 1 | RPLP1   | T Cells |
| 0         | 0.31675424 | 0.788 | 0.696 | 0       | 1 | RPL19   | T Cells |
| 1.03E-307 | 0.30445368 | 0.738 | 0.633 | 2E-303  | 1 | RPS20   | T Cells |
| 0         | 0.32963658 | 0.913 | 0.853 | 0       | 1 | RPL36   | T Cells |
| 1E-266    | 0.29483781 | 0.692 | 0.583 | 2E-262  | 1 | RPS5    | T Cells |
| 0         | 0.32601831 | 0.938 | 0.885 | 0       | 1 | RPS28   | T Cells |
| 3.7E-287  | 0.3027305  | 0.76  | 0.666 | 8E-283  | 1 | RPL31   | T Cells |
| 1.45E-268 | 0.28343296 | 0.726 | 0.624 | 3E-264  | 1 | RPL37   | T Cells |
| 0         | 0.30492478 | 0.892 | 0.835 | 0       | 1 | RPL35   | T Cells |
| 0         | 0.28795946 | 0.822 | 0.727 | 0       | 1 | RPL3    | T Cells |
| 7.66E-277 | 0.28484667 | 0.788 | 0.705 | 2E-272  | 1 | RPS13   | T Cells |
| 1.95E-237 | 0.26900936 | 0.706 | 0.609 | 4E-233  | 1 | RPS16   | T Cells |
| 2.48E-234 | 0.2630184  | 0.685 | 0.581 | 5E-230  | 1 | RPL18   | T Cells |
| 0         | 0.28355126 | 0.896 | 0.832 | 0       | 1 | RPL26   | T Cells |
| 5.71E-210 | 0.25214245 | 0.653 | 0.541 | 1E-205  | 1 | RPL27   | T Cells |
| 3.67E-275 | 0.2664662  | 0.783 | 0.692 | 8E-271  | 1 | RPS17   | T Cells |
| 4E-200    | 0.25523994 | 0.67  | 0.569 | 9E-196  | 1 | RPL10A  | T Cells |
| 2.93E-218 | 0.25918377 | 0.755 | 0.688 | 6E-214  | 1 | RPL9    | T Cells |
| 0         | 0.27092839 | 0.981 | 0.965 | 0       | 1 | RPL41   | T Cells |
| 1.03E-277 | 0.25338074 | 0.878 | 0.826 | 2E-273  | 1 | RPS23   | T Cells |
| 4.1E-130  | -0.2549872 | 0.015 | 0.101 | 9E-126  | 1 | FXD4    | T Cells |
| 3.17E-147 | -0.4691059 | 0.009 | 0.101 | 7E-143  | 1 | UMOD    | T Cells |
| 2.49E-190 | -0.3287239 | 0.029 | 0.155 | 6E-186  | 1 | CXCL2   | T Cells |
| 0         | -0.2619098 | 0.068 | 0.282 | 0       | 1 | CD59    | T Cells |
| 0         | -0.2548446 | 0.08  | 0.305 | 0       | 1 | APP     | T Cells |
| 0         | -0.3267322 | 0.068 | 0.322 | 0       | 1 | CD9     | T Cells |
| 2.46E-178 | -0.2824858 | 0.043 | 0.168 | 5E-174  | 1 | FCER1G  | T Cells |
| 3.56E-200 | -0.2729315 | 0.051 | 0.19  | 8E-196  | 1 | SPARC   | T Cells |
| 3.58E-191 | -0.2722077 | 0.051 | 0.186 | 8E-187  | 1 | IFI27   | T Cells |
| 8.8E-158  | -0.3180801 | 0.034 | 0.144 | 2E-153  | 1 | SPARCL1 | T Cells |
| 0         | -0.2965515 | 0.103 | 0.337 | 0       | 1 | RHOB    | T Cells |
| 0         | -0.2532281 | 0.141 | 0.377 | 0       | 1 | LAPTM4A | T Cells |
| 4.11E-276 | -0.345373  | 0.072 | 0.258 | 9E-272  | 1 | HES1    | T Cells |
| 1.96E-186 | -0.3975408 | 0.042 | 0.172 | 4E-182  | 1 | MGP     | T Cells |
| 2.93E-129 | -0.3168404 | 0.045 | 0.145 | 6E-125  | 1 | CTGF    | T Cells |
| 3.041E-97 | -0.2951077 | 0.042 | 0.121 | 6.7E-93 | 1 | C1QA    | T Cells |
| 0         | -0.3614528 | 0.096 | 0.33  | 0       | 1 | NPC2    | T Cells |
| 1.27E-205 | -0.3478387 | 0.062 | 0.205 | 3E-201  | 1 | TYROBP  | T Cells |
| 4.952E-94 | -0.2937275 | 0.046 | 0.126 | 1.1E-89 | 1 | CCL3    | T Cells |
| 2.73E-196 | -0.3421814 | 0.065 | 0.205 | 6E-192  | 1 | AIF1    | T Cells |
| 9.42E-178 | -0.4436378 | 0.04  | 0.163 | 2E-173  | 1 | LYZ     | T Cells |
| 6.67E-303 | -0.2619258 | 0.171 | 0.395 | 1E-298  | 1 | GSTP1   | T Cells |
| 0         | -0.3585282 | 0.112 | 0.354 | 0       | 1 | PSAP    | T Cells |
| 0         | -0.3548935 | 0.144 | 0.444 | 0       | 1 | CD63    | T Cells |
| 1.56E-210 | -0.2535032 | 0.158 | 0.331 | 3E-206  | 1 | GPX1    | T Cells |

|           |            |       |       |         |   |         |                       |
|-----------|------------|-------|-------|---------|---|---------|-----------------------|
| 1.282E-84 | -0.2536332 | 0.079 | 0.164 | 2.8E-80 | 1 | MMP7    | T Cells               |
| 5.43E-291 | -0.3319538 | 0.138 | 0.345 | 1E-286  | 1 | CTSD    | T Cells               |
| 1.31E-140 | -0.2994629 | 0.101 | 0.224 | 3E-136  | 1 | CRYAB   | T Cells               |
| 0         | -0.4490753 | 0.125 | 0.412 | 0       | 1 | IFITM3  | T Cells               |
| 6.33E-166 | -0.3195782 | 0.107 | 0.246 | 1E-161  | 1 | MT1E    | T Cells               |
| 2.19E-164 | -0.47555   | 0.051 | 0.171 | 5E-160  | 1 | IGFBP5  | T Cells               |
| 3.61E-190 | -0.5140366 | 0.051 | 0.184 | 8E-186  | 1 | S100A2  | T Cells               |
| 0         | -0.5034212 | 0.128 | 0.449 | 0       | 1 | CST3    | T Cells               |
| 2.67E-176 | -0.369837  | 0.093 | 0.235 | 6E-172  | 1 | TIMP1   | T Cells               |
| 0         | -0.340167  | 0.19  | 0.44  | 0       | 1 | DSTN    | T Cells               |
| 5.36E-299 | -0.3519635 | 0.15  | 0.358 | 1E-294  | 1 | CD24    | T Cells               |
| 0         | -0.3140897 | 0.224 | 0.468 | 0       | 1 | S100A11 | T Cells               |
| 1.17E-290 | -0.2707547 | 0.321 | 0.549 | 3E-286  | 1 | NDUFA4  | T Cells               |
| 1.8E-249  | -0.2558533 | 0.351 | 0.558 | 4E-245  | 1 | MYL6    | T Cells               |
| 0         | -0.7261685 | 0.078 | 0.32  | 0       | 1 | DEFB1   | T Cells               |
| 8.45E-271 | -0.4143064 | 0.145 | 0.335 | 2E-266  | 1 | FXD2    | T Cells               |
| 2.87E-200 | -0.3123464 | 0.24  | 0.41  | 6E-196  | 1 | EGR1    | T Cells               |
| 5.7E-143  | -0.2853705 | 0.243 | 0.376 | 1E-138  | 1 | VIM     | T Cells               |
| 6.79E-246 | -0.4672143 | 0.121 | 0.304 | 1E-241  | 1 | CLU     | T Cells               |
| 0         | -0.4203277 | 0.203 | 0.454 | 0       | 1 | HSPB1   | T Cells               |
| 3.152E-59 | -0.2995851 | 0.122 | 0.194 | 7E-55   | 1 | APOE    | T Cells               |
| 1.44E-266 | -0.3563346 | 0.275 | 0.48  | 3E-262  | 1 | HSPA1A  | T Cells               |
| 0         | -0.6239738 | 0.106 | 0.316 | 0       | 1 | ADIRF   | T Cells               |
| 0         | -0.6378741 | 0.181 | 0.502 | 0       | 1 | IGFBP7  | T Cells               |
| 3.66E-205 | -0.4362465 | 0.21  | 0.379 | 8E-201  | 1 | LGALS1  | T Cells               |
| 4.069E-42 | -0.2516475 | 0.666 | 0.684 | 9E-38   | 1 | FOS     | T Cells               |
| 0         | -0.851925  | 0.116 | 0.401 | 0       | 1 | ATP1B1  | T Cells               |
| 4.71E-269 | -0.6478195 | 0.118 | 0.306 | 1E-264  | 1 | WFDC2   | T Cells               |
| 0         | -0.4673977 | 0.378 | 0.684 | 0       | 1 | ITM2B   | T Cells               |
| 8.987E-81 | -0.3337104 | 0.373 | 0.467 | 2E-76   | 1 | CD74    | T Cells               |
| 1.56E-257 | -0.4108381 | 0.4   | 0.587 | 3E-253  | 1 | SAT1    | T Cells               |
| 0         | -0.368801  | 0.699 | 0.872 | 0       | 1 | NEAT1   | T Cells               |
| 4.672E-47 | -0.3963636 | 0.212 | 0.281 | 1E-42   | 1 | MT1X    | T Cells               |
| 5.5E-155  | -0.3565668 | 0.728 | 0.806 | 1E-150  | 1 | FTH1    | T Cells               |
| 7.237E-75 | -0.4989149 | 0.298 | 0.382 | 1.6E-70 | 1 | HLA-DRA | T Cells               |
| 0         | -0.618363  | 0.457 | 0.724 | 0       | 1 | S100A6  | T Cells               |
| 3.75E-183 | -0.5614089 | 0.368 | 0.523 | 8E-179  | 1 | MT2A    | T Cells               |
| 6.063E-12 | -0.5934749 | 0.213 | 0.243 | 1.3E-07 | 1 | MT1G    | T Cells               |
| 0         | -1.1590605 | 0.18  | 0.395 | 0       | 1 | SPP1    | T Cells               |
| 1.709E-54 | -0.6167272 | 0.748 | 0.79  | 3.8E-50 | 1 | FTL     | T Cells               |
| 1.161E-48 | -1.2544893 | 0.128 | 0.077 | 2.6E-44 | 1 | IGLC3   | T Cells               |
| 1.041E-28 | -1.4660827 | 0.129 | 0.087 | 2.3E-24 | 1 | IGLC2   | T Cells               |
| 9.5E-157  | -1.664717  | 0.304 | 0.172 | 2E-152  | 1 | IGKC    | T Cells               |
| 0         | 0.3749395  | 0.207 | 0.01  | 0       | 2 | RBP4    | Proximal tubule cells |
| 0         | 1.07080113 | 0.631 | 0.126 | 0       | 2 | MMP7    | Proximal tubule cells |
| 0         | 1.07334504 | 0.779 | 0.177 | 0       | 2 | CRYAB   | Proximal tubule cells |
| 0         | 0.40229691 | 0.398 | 0.039 | 0       | 2 | ACSM2A  | Proximal tubule cells |
| 0         | 1.33737005 | 0.705 | 0.263 | 0       | 2 | CLU     | Proximal tubule cells |

|           |            |       |       |        |   |          |                       |
|-----------|------------|-------|-------|--------|---|----------|-----------------------|
| 0         | 0.46340431 | 0.433 | 0.059 | 0      | 2 | VCAM1    | Proximal tubule cells |
| 0         | 0.57574388 | 0.519 | 0.093 | 0      | 2 | PDZK1IP1 | Proximal tubule cells |
| 0         | 0.26236407 | 0.257 | 0.021 | 0      | 2 | CDH6     | Proximal tubule cells |
| 0         | 0.42680513 | 0.443 | 0.062 | 0      | 2 | UGT2B7   | Proximal tubule cells |
| 0         | 0.61150912 | 0.494 | 0.101 | 0      | 2 | PIGR     | Proximal tubule cells |
| 0         | 0.5721103  | 0.592 | 0.16  | 0      | 2 | TPM1     | Proximal tubule cells |
| 0         | 0.55007462 | 0.531 | 0.138 | 0      | 2 | CXCL14   | Proximal tubule cells |
| 0         | 0.28689529 | 0.311 | 0.051 | 0      | 2 | AKAP12   | Proximal tubule cells |
| 0         | 0.70431463 | 0.542 | 0.22  | 0      | 2 | MT1G     | Proximal tubule cells |
| 0         | 0.25707759 | 0.222 | 0.033 | 0      | 2 | FHL1     | Proximal tubule cells |
| 0         | 0.3761757  | 0.413 | 0.093 | 0      | 2 | TNFSF10  | Proximal tubule cells |
| 0         | 0.30163993 | 0.342 | 0.064 | 0      | 2 | LINC0132 | Proximal tubule cells |
| 0         | 0.4078095  | 0.474 | 0.123 | 0      | 2 | KRT18    | Proximal tubule cells |
| 0         | 0.33926576 | 0.363 | 0.081 | 0      | 2 | MGST1    | Proximal tubule cells |
| 0         | 0.38518778 | 0.408 | 0.112 | 0      | 2 | MT1F     | Proximal tubule cells |
| 0         | 0.56395823 | 0.533 | 0.216 | 0      | 2 | MT1E     | Proximal tubule cells |
| 0         | 0.70357636 | 0.554 | 0.285 | 0      | 2 | ADIRF    | Proximal tubule cells |
| 0         | 0.63658895 | 0.523 | 0.259 | 0      | 2 | MT1X     | Proximal tubule cells |
| 0         | 0.49064501 | 0.734 | 0.317 | 0      | 2 | CD24     | Proximal tubule cells |
| 0         | 0.26565239 | 0.351 | 0.084 | 0      | 2 | GATM     | Proximal tubule cells |
| 0         | 0.38925136 | 0.485 | 0.174 | 0      | 2 | SOX4     | Proximal tubule cells |
| 0         | 0.31218666 | 0.413 | 0.124 | 0      | 2 | OCIAD2   | Proximal tubule cells |
| 0         | 0.26961888 | 0.344 | 0.091 | 0      | 2 | KRT8     | Proximal tubule cells |
| 0         | 0.29086921 | 0.355 | 0.102 | 0      | 2 | TSPAN1   | Proximal tubule cells |
| 0         | 0.28077052 | 0.382 | 0.109 | 0      | 2 | SPATS2L  | Proximal tubule cells |
| 0         | 0.37225973 | 0.554 | 0.236 | 0      | 2 | IL32     | Proximal tubule cells |
| 0         | 0.29788247 | 0.293 | 0.108 | 0      | 2 | KRT19    | Proximal tubule cells |
| 0         | 0.2709792  | 0.277 | 0.093 | 0      | 2 | SERPINA1 | Proximal tubule cells |
| 0         | 0.29517588 | 0.456 | 0.168 | 0      | 2 | EMX2     | Proximal tubule cells |
| 0         | 0.39086057 | 0.664 | 0.34  | 0      | 2 | LAPTM4A  | Proximal tubule cells |
| 0         | 0.32662214 | 0.636 | 0.301 | 0      | 2 | FXD2     | Proximal tubule cells |
| 0         | 0.25794538 | 0.466 | 0.196 | 0      | 2 | S100A13  | Proximal tubule cells |
| 0         | 0.41749999 | 0.71  | 0.499 | 0      | 2 | MT2A     | Proximal tubule cells |
| 0         | 0.38876221 | 0.7   | 0.465 | 0      | 2 | IGFBP7   | Proximal tubule cells |
| 0         | 0.40445312 | 0.884 | 0.648 | 0      | 2 | ITM2B    | Proximal tubule cells |
| 0         | 0.32364615 | 0.685 | 0.42  | 0      | 2 | HSPB1    | Proximal tubule cells |
| 0         | 0.26707136 | 0.611 | 0.361 | 0      | 2 | S100A10  | Proximal tubule cells |
| 0         | 0.32794684 | 0.965 | 0.852 | 0      | 2 | TMSB10   | Proximal tubule cells |
| 4.17E-172 | 0.26695151 | 0.514 | 0.37  | 9E-168 | 2 | GSTP1    | Proximal tubule cells |
| 3.34E-135 | -0.2535845 | 0.014 | 0.105 | 7E-131 | 2 | C1QB     | Proximal tubule cells |
| 4E-162    | -0.3368587 | 0.016 | 0.123 | 9E-158 | 2 | C1QA     | Proximal tubule cells |
| 1.68E-220 | -0.3077523 | 0.026 | 0.168 | 4E-216 | 2 | FCER1G   | Proximal tubule cells |
| 2.61E-172 | -0.3227463 | 0.023 | 0.14  | 6E-168 | 2 | CCL4     | Proximal tubule cells |
| 1.25E-179 | -0.3385657 | 0.024 | 0.144 | 3E-175 | 2 | SPARCL1  | Proximal tubule cells |
| 5.86E-218 | -0.2593509 | 0.042 | 0.191 | 1E-213 | 2 | CD52     | Proximal tubule cells |
| 1.16E-147 | -0.3256125 | 0.023 | 0.127 | 3E-143 | 2 | CCL3     | Proximal tubule cells |
| 9E-181    | -0.2957554 | 0.036 | 0.163 | 2E-176 | 2 | CCL5     | Proximal tubule cells |
| 2.75E-265 | -0.3803996 | 0.037 | 0.206 | 6E-261 | 2 | TYROBP   | Proximal tubule cells |

|           |            |       |       |         |   |          |                                     |
|-----------|------------|-------|-------|---------|---|----------|-------------------------------------|
| 7.54E-212 | -0.3187658 | 0.042 | 0.188 | 2E-207  | 2 | RGS1     | Proximal tubule cells               |
| 2.21E-256 | -0.3784104 | 0.04  | 0.206 | 5E-252  | 2 | AIF1     | Proximal tubule cells               |
| 1.06E-206 | -0.4564201 | 0.027 | 0.164 | 2E-202  | 2 | LYZ      | Proximal tubule cells               |
| 0         | -0.5550365 | 0.053 | 0.349 | 0       | 2 | SRGN     | Proximal tubule cells               |
| 2.55E-268 | -0.3269335 | 0.075 | 0.258 | 6E-264  | 2 | CXCR4    | Proximal tubule cells               |
| 0         | -0.4369672 | 0.07  | 0.317 | 0       | 2 | S100A4   | Proximal tubule cells               |
| 2.13E-169 | -0.3129222 | 0.104 | 0.244 | 5E-165  | 2 | HLA-DPB1 | Proximal tubule cells               |
| 1.28E-238 | -0.2978621 | 0.168 | 0.347 | 3E-234  | 2 | SH3BGR1  | Proximal tubule cells               |
| 2.3E-195  | -0.2856462 | 0.246 | 0.407 | 5E-191  | 2 | BTG1     | Proximal tubule cells               |
| 5.2E-150  | -0.2759557 | 0.348 | 0.473 | 1E-145  | 2 | PABPC1   | Proximal tubule cells               |
| 1.101E-62 | -0.3932604 | 0.096 | 0.168 | 2.4E-58 | 2 | IGFBP5   | Proximal tubule cells               |
| 1.82E-228 | -0.4422389 | 0.197 | 0.379 | 4E-224  | 2 | LGALS1   | Proximal tubule cells               |
| 5.733E-55 | -0.3749135 | 0.111 | 0.18  | 1.3E-50 | 2 | S100A2   | Proximal tubule cells               |
| 8.5E-101  | -0.3004702 | 0.44  | 0.524 | 1.9E-96 | 2 | DUSP1    | Proximal tubule cells               |
| 4.61E-267 | -2.1765911 | 0.025 | 0.192 | 1E-262  | 2 | IGKC     | Proximal tubule cells               |
| 2.046E-87 | -0.3188513 | 0.64  | 0.686 | 4.5E-83 | 2 | FOS      | Proximal tubule cells               |
| 2.7E-157  | -0.3671074 | 0.474 | 0.582 | 6E-153  | 2 | SAT1     | Proximal tubule cells               |
| 3.58E-122 | -0.3160234 | 0.81  | 0.834 | 8E-118  | 2 | ACTB     | Proximal tubule cells               |
| 2.438E-06 | -0.3332643 | 0.31  | 0.304 | 0.05386 | 2 | DEFB1    | Proximal tubule cells               |
| 3.98E-109 | -0.4309634 | 0.38  | 0.467 | 9E-105  | 2 | CD74     | Proximal tubule cells               |
| 1.13E-282 | -0.7848038 | 0.202 | 0.388 | 3E-278  | 2 | HLA-DRA  | Proximal tubule cells               |
| 1.436E-41 | -0.660558  | 0.814 | 0.786 | 3.2E-37 | 2 | FTL      | Proximal tubule cells               |
| 0         | -0.6981121 | 0.871 | 0.888 | 0       | 2 | TMSB4X   | Proximal tubule cells               |
| 0         | -0.767481  | 0.959 | 0.95  | 0       | 2 | B2M      | Proximal tubule cells               |
| 0         | 1.0236214  | 0.514 | 0.037 | 0       | 3 | GNLY     | Immune/NK cells, T cells, NKT cells |
| 0         | 1.2321579  | 0.821 | 0.112 | 0       | 3 | CCL5     | Immune/NK cells, T cells, NKT cells |
| 0         | 0.79750303 | 0.602 | 0.054 | 0       | 3 | NKG7     | Immune/NK cells, T cells, NKT cells |
| 0         | 1.08914358 | 0.608 | 0.101 | 0       | 3 | CCL4     | Immune/NK cells, T cells, NKT cells |
| 0         | 0.57987412 | 0.465 | 0.044 | 0       | 3 | GZMA     | Immune/NK cells, T cells, NKT cells |
| 0         | 0.50890067 | 0.312 | 0.029 | 0       | 3 | IFNG     | Immune/NK cells, T cells, NKT cells |
| 0         | 0.45253447 | 0.394 | 0.034 | 0       | 3 | KLRD1    | Immune/NK cells, T cells, NKT cells |
| 0         | 0.38128802 | 0.281 | 0.022 | 0       | 3 | GZMB     | Immune/NK cells, T cells, NKT cells |
| 0         | 0.27822355 | 0.232 | 0.015 | 0       | 3 | GZMH     | Immune/NK cells, T cells, NKT cells |
| 0         | 0.6700466  | 0.568 | 0.123 | 0       | 3 | CD69     | Immune/NK cells, T cells, NKT cells |
| 0         | 0.68474649 | 0.635 | 0.152 | 0       | 3 | CD52     | Immune/NK cells, T cells, NKT cells |
| 0         | 0.26574269 | 0.253 | 0.024 | 0       | 3 | CST7     | Immune/NK cells, T cells, NKT cells |
| 0         | 0.74292462 | 0.698 | 0.217 | 0       | 3 | CXCR4    | Immune/NK cells, T cells, NKT cells |
| 0         | 0.40437923 | 0.391 | 0.067 | 0       | 3 | CD2      | Immune/NK cells, T cells, NKT cells |
| 0         | 0.40374672 | 0.398 | 0.071 | 0       | 3 | CD3D     | Immune/NK cells, T cells, NKT cells |
| 0         | 0.39393998 | 0.276 | 0.051 | 0       | 3 | KLRB1    | Immune/NK cells, T cells, NKT cells |
| 0         | 0.25240445 | 0.25  | 0.031 | 0       | 3 | CD7      | Immune/NK cells, T cells, NKT cells |
| 0         | 0.4781689  | 0.51  | 0.123 | 0       | 3 | HCST     | Immune/NK cells, T cells, NKT cells |
| 0         | 0.39178416 | 0.301 | 0.06  | 0       | 3 | CMC1     | Immune/NK cells, T cells, NKT cells |
| 0         | 0.28259822 | 0.264 | 0.044 | 0       | 3 | TRBC1    | Immune/NK cells, T cells, NKT cells |
| 0         | 0.44802427 | 0.499 | 0.138 | 0       | 3 | PTPRC    | Immune/NK cells, T cells, NKT cells |
| 0         | 0.51385729 | 0.452 | 0.161 | 0       | 3 | RGS1     | Immune/NK cells, T cells, NKT cells |
| 0         | 0.51821074 | 0.607 | 0.233 | 0       | 3 | IL32     | Immune/NK cells, T cells, NKT cells |
| 0         | 0.35380072 | 0.189 | 0.054 | 0       | 3 | CCL4L2   | Immune/NK cells, T cells, NKT cells |

|           |            |       |       |        |   |         |                                     |
|-----------|------------|-------|-------|--------|---|---------|-------------------------------------|
| 0         | 0.61841687 | 0.733 | 0.374 | 0      | 3 | BTG1    | Immune/NK cells, T cells, NKT cells |
| 0         | 0.36158284 | 0.394 | 0.118 | 0      | 3 | PPP2R5C | Immune/NK cells, T cells, NKT cells |
| 0         | 0.40324021 | 0.442 | 0.155 | 0      | 3 | TNFAIP3 | Immune/NK cells, T cells, NKT cells |
| 0         | 0.41669409 | 0.293 | 0.109 | 0      | 3 | CCL3    | Immune/NK cells, T cells, NKT cells |
| 0         | 0.4360354  | 0.503 | 0.217 | 0      | 3 | ID2     | Immune/NK cells, T cells, NKT cells |
| 0         | 0.39849192 | 0.669 | 0.307 | 0      | 3 | SRGN    | Immune/NK cells, T cells, NKT cells |
| 0         | 0.3077697  | 0.386 | 0.143 | 0      | 3 | NR4A2   | Immune/NK cells, T cells, NKT cells |
| 0         | 0.7691215  | 1     | 0.947 | 0      | 3 | B2M     | Immune/NK cells, T cells, NKT cells |
| 0         | 0.48412311 | 0.722 | 0.448 | 0      | 3 | PABPC1  | Immune/NK cells, T cells, NKT cells |
| 2.01E-301 | 0.2928549  | 0.224 | 0.087 | 4E-297 | 3 | AREG    | Immune/NK cells, T cells, NKT cells |
| 0         | 0.35989565 | 0.572 | 0.283 | 0      | 3 | S100A4  | Immune/NK cells, T cells, NKT cells |
| 0         | 0.37748711 | 0.586 | 0.319 | 0      | 3 | SH3BGR1 | Immune/NK cells, T cells, NKT cells |
| 0         | 0.3611378  | 0.515 | 0.282 | 0      | 3 | ZFP36L2 | Immune/NK cells, T cells, NKT cells |
| 0         | 0.32209365 | 0.471 | 0.257 | 0      | 3 | TSC22D3 | Immune/NK cells, T cells, NKT cells |
| 0         | 0.44741514 | 0.815 | 0.625 | 0      | 3 | H3F3B   | Immune/NK cells, T cells, NKT cells |
| 0         | 0.45734232 | 0.856 | 0.683 | 0      | 3 | RPS26   | Immune/NK cells, T cells, NKT cells |
| 0         | 0.48929778 | 0.999 | 0.879 | 0      | 3 | TMSB4X  | Immune/NK cells, T cells, NKT cells |
| 0         | 0.51283326 | 0.998 | 0.968 | 0      | 3 | RPS27   | Immune/NK cells, T cells, NKT cells |
| 0         | 0.36399837 | 0.663 | 0.463 | 0      | 3 | PFN1    | Immune/NK cells, T cells, NKT cells |
| 0         | 0.39820123 | 0.928 | 0.793 | 0      | 3 | RPL28   | Immune/NK cells, T cells, NKT cells |
| 0         | 0.39535786 | 0.816 | 0.704 | 0      | 3 | HSP90AA | Immune/NK cells, T cells, NKT cells |
| 0         | 0.3953987  | 0.944 | 0.824 | 0      | 3 | RPLP2   | Immune/NK cells, T cells, NKT cells |
| 0         | 0.44112041 | 1     | 0.999 | 0      | 3 | MALAT1  | Immune/NK cells, T cells, NKT cells |
| 1.29E-284 | 0.2983948  | 0.56  | 0.387 | 3E-280 | 3 | MYL12A  | Immune/NK cells, T cells, NKT cells |
| 0         | 0.36934411 | 0.938 | 0.816 | 0      | 3 | RPS15A  | Immune/NK cells, T cells, NKT cells |
| 0         | 0.39319546 | 0.99  | 0.938 | 0      | 3 | RPL39   | Immune/NK cells, T cells, NKT cells |
| 0         | 0.33690421 | 0.879 | 0.744 | 0      | 3 | RPL18A  | Immune/NK cells, T cells, NKT cells |
| 1.05E-180 | 0.27171526 | 0.459 | 0.316 | 2E-176 | 3 | DNAJB1  | Immune/NK cells, T cells, NKT cells |
| 0         | 0.3210009  | 0.783 | 0.646 | 0      | 3 | RPS3    | Immune/NK cells, T cells, NKT cells |
| 0         | 0.36023507 | 0.979 | 0.909 | 0      | 3 | RPL13A  | Immune/NK cells, T cells, NKT cells |
| 1.01E-242 | 0.27752442 | 0.59  | 0.446 | 2E-238 | 3 | DDX5    | Immune/NK cells, T cells, NKT cells |
| 0         | 0.34242606 | 0.993 | 0.945 | 0      | 3 | RPL21   | Immune/NK cells, T cells, NKT cells |
| 0         | 0.3222496  | 0.977 | 0.924 | 0      | 3 | RPS29   | Immune/NK cells, T cells, NKT cells |
| 0         | 0.29945184 | 0.83  | 0.73  | 0      | 3 | RPL27A  | Immune/NK cells, T cells, NKT cells |
| 0         | 0.30548231 | 0.979 | 0.916 | 0      | 3 | RPL13   | Immune/NK cells, T cells, NKT cells |
| 3.97E-207 | 0.26029869 | 0.614 | 0.496 | 9E-203 | 3 | EEF1D   | Immune/NK cells, T cells, NKT cells |
| 0         | 0.28354591 | 0.98  | 0.91  | 0      | 3 | RPL10   | Immune/NK cells, T cells, NKT cells |
| 0         | 0.27984211 | 0.961 | 0.891 | 0      | 3 | RPS15   | Immune/NK cells, T cells, NKT cells |
| 0         | 0.26070414 | 0.97  | 0.889 | 0      | 3 | RPS19   | Immune/NK cells, T cells, NKT cells |
| 0         | 0.26740799 | 0.976 | 0.918 | 0      | 3 | RPLP1   | Immune/NK cells, T cells, NKT cells |
| 1.8E-155  | -0.2688553 | 0.002 | 0.102 | 4E-151 | 3 | FXD4    | Immune/NK cells, T cells, NKT cells |
| 4.67E-179 | -0.2511934 | 0.004 | 0.118 | 1E-174 | 3 | TMEM52B | Immune/NK cells, T cells, NKT cells |
| 1.2E-158  | -0.2533885 | 0.004 | 0.107 | 3E-154 | 3 | SLC12A1 | Immune/NK cells, T cells, NKT cells |
| 1.47E-255 | -0.3544208 | 0.012 | 0.174 | 3E-251 | 3 | CXCL14  | Immune/NK cells, T cells, NKT cells |
| 0         | -0.2537967 | 0.025 | 0.254 | 0      | 3 | WBP5    | Immune/NK cells, T cells, NKT cells |
| 2.15E-257 | -0.2808256 | 0.018 | 0.184 | 5E-253 | 3 | TIMP3   | Immune/NK cells, T cells, NKT cells |
| 1.19E-137 | -0.2936868 | 0.01  | 0.105 | 3E-133 | 3 | MT1H    | Immune/NK cells, T cells, NKT cells |
| 1.94E-241 | -0.3680783 | 0.013 | 0.168 | 4E-237 | 3 | MMP7    | Immune/NK cells, T cells, NKT cells |

|           |            |       |       |         |   |          |                                     |
|-----------|------------|-------|-------|---------|---|----------|-------------------------------------|
| 0         | -0.3190746 | 0.028 | 0.307 | 0       | 3 | APP      | Immune/NK cells, T cells, NKT cells |
| 0         | -0.3777044 | 0.028 | 0.323 | 0       | 3 | CD9      | Immune/NK cells, T cells, NKT cells |
| 0         | -0.3056846 | 0.036 | 0.301 | 0       | 3 | NGFRAP1  | Immune/NK cells, T cells, NKT cells |
| 0         | -0.4435936 | 0.02  | 0.229 | 0       | 3 | CRYAB    | Immune/NK cells, T cells, NKT cells |
| 0         | -0.5433937 | 0.026 | 0.364 | 0       | 3 | CD24     | Immune/NK cells, T cells, NKT cells |
| 7.57E-250 | -0.524089  | 0.013 | 0.173 | 2E-245  | 3 | IGFBP5   | Immune/NK cells, T cells, NKT cells |
| 7.73E-275 | -0.5685808 | 0.014 | 0.186 | 2E-270  | 3 | S100A2   | Immune/NK cells, T cells, NKT cells |
| 0         | -0.6002796 | 0.026 | 0.342 | 0       | 3 | FXD2     | Immune/NK cells, T cells, NKT cells |
| 0         | -0.4156378 | 0.029 | 0.259 | 0       | 3 | HES1     | Immune/NK cells, T cells, NKT cells |
| 1.72E-268 | -0.3174452 | 0.031 | 0.21  | 4E-264  | 3 | GPX3     | Immune/NK cells, T cells, NKT cells |
| 8.2E-227  | -0.2657429 | 0.034 | 0.192 | 2E-222  | 3 | CALD1    | Immune/NK cells, T cells, NKT cells |
| 0         | -0.2775325 | 0.049 | 0.282 | 0       | 3 | CD59     | Immune/NK cells, T cells, NKT cells |
| 0         | -0.8317531 | 0.019 | 0.323 | 0       | 3 | DEFB1    | Immune/NK cells, T cells, NKT cells |
| 5.46E-200 | -0.2721596 | 0.043 | 0.19  | 1E-195  | 3 | SPARC    | Immune/NK cells, T cells, NKT cells |
| 1.24E-186 | -0.2718791 | 0.045 | 0.186 | 3E-182  | 3 | IFI27    | Immune/NK cells, T cells, NKT cells |
| 0         | -0.4160277 | 0.044 | 0.249 | 0       | 3 | MT1E     | Immune/NK cells, T cells, NKT cells |
| 0         | -0.9900064 | 0.031 | 0.404 | 0       | 3 | ATP1B1   | Immune/NK cells, T cells, NKT cells |
| 9.21E-142 | -0.2962118 | 0.04  | 0.153 | 2E-137  | 3 | CXCL2    | Immune/NK cells, T cells, NKT cells |
| 0         | -0.3220187 | 0.093 | 0.379 | 0       | 3 | LAPTM4A  | Immune/NK cells, T cells, NKT cells |
| 7.86E-256 | -0.2630809 | 0.082 | 0.272 | 2E-251  | 3 | ATP1A1   | Immune/NK cells, T cells, NKT cells |
| 1.36E-187 | -0.4010581 | 0.035 | 0.172 | 3E-183  | 3 | MGP      | Immune/NK cells, T cells, NKT cells |
| 0         | -0.2925228 | 0.096 | 0.336 | 0       | 3 | RHOB     | Immune/NK cells, T cells, NKT cells |
| 0         | -0.6096003 | 0.044 | 0.308 | 0       | 3 | CLU      | Immune/NK cells, T cells, NKT cells |
| 0         | -0.8240394 | 0.033 | 0.31  | 0       | 3 | WFDC2    | Immune/NK cells, T cells, NKT cells |
| 0         | -0.750358  | 0.038 | 0.319 | 0       | 3 | ADIRF    | Immune/NK cells, T cells, NKT cells |
| 1.53E-109 | -0.282291  | 0.047 | 0.142 | 3E-105  | 3 | SPARCL1  | Immune/NK cells, T cells, NKT cells |
| 3.51E-117 | -0.3111902 | 0.045 | 0.144 | 8E-113  | 3 | CTGF     | Immune/NK cells, T cells, NKT cells |
| 0         | -0.3653771 | 0.095 | 0.353 | 0       | 3 | PSAP     | Immune/NK cells, T cells, NKT cells |
| 0         | -0.3429689 | 0.097 | 0.329 | 0       | 3 | NPC2     | Immune/NK cells, T cells, NKT cells |
| 8.09E-230 | -0.2640477 | 0.138 | 0.331 | 2E-225  | 3 | GPX1     | Immune/NK cells, T cells, NKT cells |
| 3.43E-298 | -0.2800129 | 0.16  | 0.394 | 8E-294  | 3 | GSTP1    | Immune/NK cells, T cells, NKT cells |
| 0         | -0.5324315 | 0.096 | 0.449 | 0       | 3 | CST3     | Immune/NK cells, T cells, NKT cells |
| 6.73E-167 | -0.3749528 | 0.061 | 0.197 | 1E-162  | 3 | APOE     | Immune/NK cells, T cells, NKT cells |
| 3E-274    | -0.2513237 | 0.212 | 0.445 | 7E-270  | 3 | UQCRCQ   | Immune/NK cells, T cells, NKT cells |
| 0         | -0.2901139 | 0.185 | 0.439 | 0       | 3 | CD63     | Immune/NK cells, T cells, NKT cells |
| 0         | -0.4631072 | 0.11  | 0.411 | 0       | 3 | IFITM3   | Immune/NK cells, T cells, NKT cells |
| 7.63E-119 | -0.2871606 | 0.09  | 0.202 | 2E-114  | 3 | AIF1     | Immune/NK cells, T cells, NKT cells |
| 5.09E-228 | -0.3069766 | 0.15  | 0.343 | 1E-223  | 3 | CTSD     | Immune/NK cells, T cells, NKT cells |
| 5.73E-163 | -0.3543294 | 0.09  | 0.235 | 1E-158  | 3 | TIMP1    | Immune/NK cells, T cells, NKT cells |
| 0         | -0.3797616 | 0.161 | 0.441 | 0       | 3 | DSTN     | Immune/NK cells, T cells, NKT cells |
| 0         | -0.8284198 | 0.086 | 0.506 | 0       | 3 | IGFBP7   | Immune/NK cells, T cells, NKT cells |
| 5.95E-113 | -0.3869497 | 0.059 | 0.161 | 1E-108  | 3 | LYZ      | Immune/NK cells, T cells, NKT cells |
| 0         | -0.3484707 | 0.196 | 0.468 | 0       | 3 | S100A11  | Immune/NK cells, T cells, NKT cells |
| 0         | -0.5662574 | 0.119 | 0.458 | 0       | 3 | HSPB1    | Immune/NK cells, T cells, NKT cells |
| 1.514E-84 | -0.2609468 | 0.144 | 0.241 | 3.3E-80 | 3 | HLA-DPB1 | Immune/NK cells, T cells, NKT cells |
| 0         | -0.9625573 | 0.043 | 0.254 | 0       | 3 | MT1G     | Immune/NK cells, T cells, NKT cells |
| 0         | -0.3202483 | 0.283 | 0.55  | 0       | 3 | NDUFA4   | Immune/NK cells, T cells, NKT cells |
| 3.56E-266 | -0.3489182 | 0.195 | 0.412 | 8E-262  | 3 | EGR1     | Immune/NK cells, T cells, NKT cells |

|           |            |       |       |         |   |         |                                     |
|-----------|------------|-------|-------|---------|---|---------|-------------------------------------|
| 2.97E-185 | -0.3456599 | 0.409 | 0.585 | 7E-181  | 3 | SAT1    | Immune/NK cells, T cells, NKT cells |
| 3.5E-150  | -0.518158  | 0.143 | 0.285 | 8E-146  | 3 | MT1X    | Immune/NK cells, T cells, NKT cells |
| 0         | -0.5159435 | 0.345 | 0.684 | 0       | 3 | ITM2B   | Immune/NK cells, T cells, NKT cells |
| 4.68E-229 | -0.305917  | 0.904 | 0.926 | 1E-224  | 3 | MT-ND5  | Immune/NK cells, T cells, NKT cells |
| 4.37E-227 | -0.5155349 | 0.292 | 0.472 | 1E-222  | 3 | CD74    | Immune/NK cells, T cells, NKT cells |
| 0         | -1.3069719 | 0.1   | 0.399 | 0       | 3 | SPP1    | Immune/NK cells, T cells, NKT cells |
| 0         | -0.3719503 | 0.984 | 0.992 | 0       | 3 | MT-CYB  | Immune/NK cells, T cells, NKT cells |
| 0         | -0.3885392 | 0.991 | 0.995 | 0       | 3 | MT-ND2  | Immune/NK cells, T cells, NKT cells |
| 0         | -0.4564607 | 0.688 | 0.808 | 0       | 3 | FTH1    | Immune/NK cells, T cells, NKT cells |
| 0         | -0.4620661 | 0.72  | 0.81  | 0       | 3 | MT-ND4L | Immune/NK cells, T cells, NKT cells |
| 5.19E-134 | -0.6217667 | 0.26  | 0.384 | 1E-129  | 3 | HLA-DRA | Immune/NK cells, T cells, NKT cells |
| 5.96E-238 | -0.6671191 | 0.339 | 0.524 | 1E-233  | 3 | MT2A    | Immune/NK cells, T cells, NKT cells |
| 0         | -0.6553792 | 0.496 | 0.72  | 0       | 3 | S100A6  | Immune/NK cells, T cells, NKT cells |
| 0         | -0.4658828 | 0.987 | 0.994 | 0       | 3 | MT-ATP6 | Immune/NK cells, T cells, NKT cells |
| 0         | -0.4830154 | 1     | 0.999 | 0       | 3 | MT-ND4  | Immune/NK cells, T cells, NKT cells |
| 1.727E-32 | -0.5091234 | 0.781 | 0.788 | 3.8E-28 | 3 | FTL     | Immune/NK cells, T cells, NKT cells |
| 0         | -0.5051578 | 1     | 1     | 0       | 3 | MT-CO2  | Immune/NK cells, T cells, NKT cells |
| 0         | -0.5264096 | 0.998 | 0.999 | 0       | 3 | MT-ND3  | Immune/NK cells, T cells, NKT cells |
| 0         | -0.5434572 | 1     | 1     | 0       | 3 | MT-CO1  | Immune/NK cells, T cells, NKT cells |
| 0         | -0.6309964 | 0.932 | 0.966 | 0       | 3 | MT-ND1  | Immune/NK cells, T cells, NKT cells |
| 0         | -0.6821074 | 1     | 1     | 0       | 3 | MT-CO3  | Immune/NK cells, T cells, NKT cells |
| 1.044E-47 | -0.5453173 | 0.136 | 0.08  | 2.3E-43 | 3 | IGHG3   | Immune/NK cells, T cells, NKT cells |
| 4.33E-194 | -1.1826829 | 0.18  | 0.074 | 1E-189  | 3 | IGLC3   | Immune/NK cells, T cells, NKT cells |
| 1.9E-223  | -1.3393713 | 0.203 | 0.083 | 4E-219  | 3 | IGLC2   | Immune/NK cells, T cells, NKT cells |
| 0         | -1.4717889 | 0.44  | 0.164 | 0       | 3 | IGKC    | Immune/NK cells, T cells, NKT cells |
| 0         | 1.24308996 | 0.797 | 0.048 | 0       | 4 | VWF     | Endothelial cells                   |
| 0         | 0.78097172 | 0.486 | 0.022 | 0       | 4 | ACKR1   | Endothelial cells                   |
| 0         | 0.49155473 | 0.302 | 0.01  | 0       | 4 | SELE    | Endothelial cells                   |
| 0         | 1.27393354 | 0.796 | 0.094 | 0       | 4 | SPARCL1 | Endothelial cells                   |
| 0         | 0.2868842  | 0.278 | 0.009 | 0       | 4 | IL33    | Endothelial cells                   |
| 0         | 0.51079324 | 0.45  | 0.026 | 0       | 4 | COL15A1 | Endothelial cells                   |
| 0         | 0.81237852 | 0.73  | 0.069 | 0       | 4 | HSPG2   | Endothelial cells                   |
| 0         | 0.79564635 | 0.62  | 0.058 | 0       | 4 | CAV1    | Endothelial cells                   |
| 0         | 0.60680967 | 0.452 | 0.034 | 0       | 4 | EDN1    | Endothelial cells                   |
| 0         | 1.14718265 | 0.696 | 0.102 | 0       | 4 | CTGF    | Endothelial cells                   |
| 0         | 0.37237885 | 0.368 | 0.022 | 0       | 4 | NUAK1   | Endothelial cells                   |
| 0         | 0.35278734 | 0.365 | 0.021 | 0       | 4 | PALMD   | Endothelial cells                   |
| 0         | 0.31942179 | 0.344 | 0.021 | 0       | 4 | ECSCR.1 | Endothelial cells                   |
| 0         | 0.70092886 | 0.644 | 0.087 | 0       | 4 | TM4SF1  | Endothelial cells                   |
| 0         | 0.26685998 | 0.172 | 0.009 | 0       | 4 | APLN    | Endothelial cells                   |
| 0         | 0.83777438 | 0.721 | 0.12  | 0       | 4 | GNG11   | Endothelial cells                   |
| 0         | 0.45383549 | 0.352 | 0.037 | 0       | 4 | CLDN5   | Endothelial cells                   |
| 0         | 0.83285705 | 0.736 | 0.145 | 0       | 4 | SPARC   | Endothelial cells                   |
| 0         | 0.35669428 | 0.373 | 0.035 | 0       | 4 | ADGRL4  | Endothelial cells                   |
| 0         | 0.47535849 | 0.508 | 0.064 | 0       | 4 | PECAM1  | Endothelial cells                   |
| 0         | 0.58527943 | 0.52  | 0.083 | 0       | 4 | CYR61   | Endothelial cells                   |
| 0         | 0.4693849  | 0.505 | 0.065 | 0       | 4 | ENG     | Endothelial cells                   |
| 0         | 0.42226778 | 0.45  | 0.053 | 0       | 4 | CD93    | Endothelial cells                   |

|   |            |       |       |   |   |         |                   |
|---|------------|-------|-------|---|---|---------|-------------------|
| 0 | 0.56176133 | 0.599 | 0.096 | 0 | 4 | TCF4    | Endothelial cells |
| 0 | 0.27927376 | 0.238 | 0.019 | 0 | 4 | ANGPT2  | Endothelial cells |
| 0 | 0.80623116 | 0.569 | 0.137 | 0 | 4 | MGP     | Endothelial cells |
| 0 | 0.27648607 | 0.287 | 0.025 | 0 | 4 | PLVAP   | Endothelial cells |
| 0 | 0.35468752 | 0.381 | 0.043 | 0 | 4 | PCAT19  | Endothelial cells |
| 0 | 0.47955295 | 0.431 | 0.066 | 0 | 4 | COL4A1  | Endothelial cells |
| 0 | 0.3262385  | 0.356 | 0.039 | 0 | 4 | CALCRL  | Endothelial cells |
| 0 | 0.281183   | 0.312 | 0.03  | 0 | 4 | CD34    | Endothelial cells |
| 0 | 0.77075809 | 0.775 | 0.218 | 0 | 4 | FKBP1A  | Endothelial cells |
| 0 | 0.61486863 | 0.646 | 0.147 | 0 | 4 | IFI27   | Endothelial cells |
| 0 | 0.50874261 | 0.541 | 0.104 | 0 | 4 | A2M     | Endothelial cells |
| 0 | 0.33508205 | 0.361 | 0.049 | 0 | 4 | PDLIM1  | Endothelial cells |
| 0 | 0.26565697 | 0.284 | 0.031 | 0 | 4 | TM4SF18 | Endothelial cells |
| 0 | 0.29377616 | 0.156 | 0.019 | 0 | 4 | ESM1    | Endothelial cells |
| 0 | 0.39431434 | 0.414 | 0.068 | 0 | 4 | FN1     | Endothelial cells |
| 0 | 0.3313828  | 0.339 | 0.048 | 0 | 4 | RAMP2   | Endothelial cells |
| 0 | 0.36208226 | 0.397 | 0.063 | 0 | 4 | EGFL7   | Endothelial cells |
| 0 | 0.3901858  | 0.455 | 0.089 | 0 | 4 | CCDC85B | Endothelial cells |
| 0 | 0.33408271 | 0.34  | 0.057 | 0 | 4 | COL4A2  | Endothelial cells |
| 0 | 0.31579618 | 0.338 | 0.055 | 0 | 4 | PRSS23  | Endothelial cells |
| 0 | 0.76919635 | 0.845 | 0.336 | 0 | 4 | VIM     | Endothelial cells |
| 0 | 0.34753392 | 0.422 | 0.077 | 0 | 4 | PTRF    | Endothelial cells |
| 0 | 0.3877746  | 0.43  | 0.088 | 0 | 4 | PRCP    | Endothelial cells |
| 0 | 0.25938673 | 0.279 | 0.04  | 0 | 4 | RAMP3   | Endothelial cells |
| 0 | 0.46888985 | 0.443 | 0.115 | 0 | 4 | THBS1   | Endothelial cells |
| 0 | 0.43891939 | 0.495 | 0.122 | 0 | 4 | CRIM1   | Endothelial cells |
| 0 | 0.36982396 | 0.396 | 0.088 | 0 | 4 | SPRY1   | Endothelial cells |
| 0 | 0.65840752 | 0.827 | 0.364 | 0 | 4 | IFITM3  | Endothelial cells |
| 0 | 0.45230736 | 0.301 | 0.092 | 0 | 4 | CCL2    | Endothelial cells |
| 0 | 0.34123565 | 0.399 | 0.094 | 0 | 4 | ID3     | Endothelial cells |
| 0 | 0.50911583 | 0.348 | 0.133 | 0 | 4 | CXCL2   | Endothelial cells |
| 0 | 0.49744661 | 0.643 | 0.244 | 0 | 4 | CD59    | Endothelial cells |
| 0 | 0.29074966 | 0.37  | 0.086 | 0 | 4 | NFIB    | Endothelial cells |
| 0 | 0.28120094 | 0.386 | 0.093 | 0 | 4 | EPAS1   | Endothelial cells |
| 0 | 0.32939829 | 0.471 | 0.138 | 0 | 4 | MYH9    | Endothelial cells |
| 0 | 0.32082703 | 0.322 | 0.094 | 0 | 4 | FABP5   | Endothelial cells |
| 0 | 0.5319407  | 0.744 | 0.375 | 0 | 4 | MYL12A  | Endothelial cells |
| 0 | 0.56408824 | 0.838 | 0.457 | 0 | 4 | IGFBP7  | Endothelial cells |
| 0 | 0.27443224 | 0.363 | 0.097 | 0 | 4 | MGST2   | Endothelial cells |
| 0 | 0.3207743  | 0.49  | 0.156 | 0 | 4 | VAMP5   | Endothelial cells |
| 0 | 0.32950633 | 0.306 | 0.101 | 0 | 4 | RGCC    | Endothelial cells |
| 0 | 0.28051018 | 0.341 | 0.099 | 0 | 4 | ID1     | Endothelial cells |
| 0 | 0.59000513 | 0.561 | 0.355 | 0 | 4 | LGALS1  | Endothelial cells |
| 0 | 0.26698454 | 0.392 | 0.117 | 0 | 4 | TGFBR2  | Endothelial cells |
| 0 | 0.2523086  | 0.333 | 0.105 | 0 | 4 | DUSP23  | Endothelial cells |
| 0 | 0.28286296 | 0.398 | 0.142 | 0 | 4 | CRIP2   | Endothelial cells |
| 0 | 0.39882102 | 0.634 | 0.332 | 0 | 4 | MYL12B  | Endothelial cells |
| 0 | 0.57087518 | 0.945 | 0.793 | 0 | 4 | TPT1    | Endothelial cells |

|           |            |       |       |        |   |        |                   |
|-----------|------------|-------|-------|--------|---|--------|-------------------|
| 0         | 0.29634335 | 0.548 | 0.249 | 0      | 4 | IFITM2 | Endothelial cells |
| 0         | 0.26779412 | 0.397 | 0.167 | 0      | 4 | SOCS3  | Endothelial cells |
| 0         | 0.49235367 | 0.887 | 0.689 | 0      | 4 | RPS2   | Endothelial cells |
| 0         | 0.38156507 | 0.684 | 0.415 | 0      | 4 | POLR2L | Endothelial cells |
| 0         | 0.55338303 | 0.993 | 0.88  | 0      | 4 | TMSB4X | Endothelial cells |
| 0         | 0.27168691 | 0.448 | 0.195 | 0      | 4 | YBX3   | Endothelial cells |
| 0         | 0.571311   | 0.979 | 0.92  | 0      | 4 | RPS18  | Endothelial cells |
| 0         | 0.55444707 | 0.972 | 0.889 | 0      | 4 | RPS19  | Endothelial cells |
| 0         | 0.46054964 | 0.879 | 0.725 | 0      | 4 | RPL3   | Endothelial cells |
| 0         | 0.46099969 | 0.89  | 0.746 | 0      | 4 | RPL7   | Endothelial cells |
| 0         | 0.48921852 | 0.94  | 0.844 | 0      | 4 | RPS6   | Endothelial cells |
| 0         | 0.4072304  | 0.856 | 0.641 | 0      | 4 | RPS3   | Endothelial cells |
| 0         | 0.34139774 | 0.673 | 0.423 | 0      | 4 | RPS27L | Endothelial cells |
| 0         | 0.25565144 | 0.468 | 0.221 | 0      | 4 | ANXA2  | Endothelial cells |
| 9.98E-253 | 0.34616795 | 0.524 | 0.347 | 2E-248 | 4 | CALM1  | Endothelial cells |
| 0         | 0.45342144 | 0.941 | 0.83  | 0      | 4 | RPL26  | Endothelial cells |
| 0         | 0.42440107 | 0.887 | 0.747 | 0      | 4 | RPS3A  | Endothelial cells |
| 0         | 0.30259472 | 0.614 | 0.369 | 0      | 4 | RPLP0  | Endothelial cells |
| 0         | 0.34104321 | 0.729 | 0.511 | 0      | 4 | ACTG1  | Endothelial cells |
| 3.35E-302 | 0.29137902 | 0.503 | 0.302 | 7E-298 | 4 | NPC2   | Endothelial cells |
| 0         | 0.4641072  | 0.992 | 0.978 | 0      | 4 | RPL34  | Endothelial cells |
| 0         | 0.4474864  | 0.979 | 0.939 | 0      | 4 | RPL39  | Endothelial cells |
| 0         | 0.40459697 | 0.981 | 0.851 | 0      | 4 | TMSB10 | Endothelial cells |
| 0         | 0.26630018 | 0.574 | 0.33  | 0      | 4 | BTF3   | Endothelial cells |
| 0         | 0.33402182 | 0.717 | 0.533 | 0      | 4 | MYL6   | Endothelial cells |
| 0         | 0.41340731 | 0.972 | 0.898 | 0      | 4 | RPL32  | Endothelial cells |
| 0         | 0.40803814 | 0.974 | 0.91  | 0      | 4 | RPL10  | Endothelial cells |
| 0         | 0.40025103 | 0.959 | 0.884 | 0      | 4 | RPS28  | Endothelial cells |
| 0         | 0.35075264 | 0.91  | 0.742 | 0      | 4 | RPL18A | Endothelial cells |
| 0         | 0.32890073 | 0.86  | 0.682 | 0      | 4 | RPS26  | Endothelial cells |
| 0         | 0.33076991 | 0.867 | 0.7   | 0      | 4 | RPS13  | Endothelial cells |
| 0         | 0.36561528 | 0.981 | 0.916 | 0      | 4 | RPL13  | Endothelial cells |
| 0         | 0.31391307 | 0.832 | 0.675 | 0      | 4 | RPL15  | Endothelial cells |
| 0         | 0.30389954 | 0.862 | 0.688 | 0      | 4 | RPS17  | Endothelial cells |
| 0         | 0.35625501 | 0.976 | 0.929 | 0      | 4 | EEF1A1 | Endothelial cells |
| 0         | 0.32782445 | 0.932 | 0.817 | 0      | 4 | RPS15A | Endothelial cells |
| 0         | 0.31068896 | 0.891 | 0.743 | 0      | 4 | RPS24  | Endothelial cells |
| 0         | 0.28655388 | 0.82  | 0.643 | 0      | 4 | RPS9   | Endothelial cells |
| 0         | 0.32131478 | 0.923 | 0.823 | 0      | 4 | RPS23  | Endothelial cells |
| 0         | 0.28314117 | 0.845 | 0.683 | 0      | 4 | RPL9   | Endothelial cells |
| 0         | 0.25485964 | 0.742 | 0.543 | 0      | 4 | RPS7   | Endothelial cells |
| 0         | 0.31398401 | 0.944 | 0.852 | 0      | 4 | RPS12  | Endothelial cells |
| 0         | 0.32421862 | 0.978 | 0.918 | 0      | 4 | RPLP1  | Endothelial cells |
| 0         | 0.30708755 | 0.904 | 0.804 | 0      | 4 | RPL12  | Endothelial cells |
| 3.66E-299 | 0.2528001  | 0.74  | 0.545 | 8E-295 | 4 | RPL29  | Endothelial cells |
| 0         | 0.30571874 | 0.943 | 0.851 | 0      | 4 | RPL36  | Endothelial cells |
| 0         | 0.30097752 | 0.955 | 0.875 | 0      | 4 | RPS14  | Endothelial cells |
| 0         | 0.30629574 | 0.981 | 0.936 | 0      | 4 | PTMA   | Endothelial cells |

|           |            |       |       |         |   |         |                   |
|-----------|------------|-------|-------|---------|---|---------|-------------------|
| 0         | 0.30358372 | 0.961 | 0.915 | 0       | 4 | RPS27A  | Endothelial cells |
| 0         | 0.28261015 | 0.956 | 0.891 | 0       | 4 | RPS15   | Endothelial cells |
| 4.99E-202 | 0.26226771 | 0.815 | 0.708 | 1E-197  | 4 | RPS4X   | Endothelial cells |
| 1.45E-285 | 0.27509171 | 0.921 | 0.855 | 3E-281  | 4 | RPS8    | Endothelial cells |
| 0         | 0.25726903 | 0.909 | 0.794 | 0       | 4 | RPL28   | Endothelial cells |
| 0         | 0.28875356 | 0.973 | 0.966 | 0       | 4 | RPL41   | Endothelial cells |
| 0         | 0.25601614 | 0.961 | 0.91  | 0       | 4 | RPL13A  | Endothelial cells |
| 1.46E-145 | -0.2660018 | 0.004 | 0.101 | 3E-141  | 4 | FXD4    | Endothelial cells |
| 3.89E-172 | -0.2504261 | 0.005 | 0.118 | 9E-168  | 4 | TMEM52B | Endothelial cells |
| 7.04E-255 | -0.359313  | 0.011 | 0.174 | 2E-250  | 4 | CXCL14  | Endothelial cells |
| 1.16E-139 | -0.2978971 | 0.009 | 0.105 | 3E-135  | 4 | MT1H    | Endothelial cells |
| 1.63E-226 | -0.3572501 | 0.017 | 0.168 | 4E-222  | 4 | MMP7    | Endothelial cells |
| 0         | -0.5394126 | 0.03  | 0.364 | 0       | 4 | CD24    | Endothelial cells |
| 0         | -0.6002594 | 0.029 | 0.341 | 0       | 4 | FXD2    | Endothelial cells |
| 9.31E-300 | -0.4223445 | 0.032 | 0.228 | 2E-295  | 4 | CRYAB   | Endothelial cells |
| 0         | -0.8116757 | 0.027 | 0.322 | 0       | 4 | DEFB1   | Endothelial cells |
| 7.9E-240  | -0.5490103 | 0.024 | 0.185 | 2E-235  | 4 | S100A2  | Endothelial cells |
| 2.47E-133 | -0.2658463 | 0.054 | 0.166 | 5E-129  | 4 | FCER1G  | Endothelial cells |
| 7.47E-154 | -0.2789758 | 0.075 | 0.207 | 2E-149  | 4 | GPX3    | Endothelial cells |
| 5.78E-193 | -0.400407  | 0.051 | 0.198 | 1E-188  | 4 | APOE    | Endothelial cells |
| 9.49E-185 | -0.3461836 | 0.061 | 0.204 | 2E-180  | 4 | AIF1    | Endothelial cells |
| 0         | -0.973608  | 0.045 | 0.403 | 0       | 4 | ATP1B1  | Endothelial cells |
| 1.85E-217 | -0.3680197 | 0.077 | 0.247 | 4E-213  | 4 | MT1E    | Endothelial cells |
| 4.163E-71 | -0.2734955 | 0.053 | 0.125 | 9.2E-67 | 4 | CCL3    | Endothelial cells |
| 2.34E-158 | -0.3329221 | 0.073 | 0.203 | 5E-154  | 4 | TYROBP  | Endothelial cells |
| 0         | -0.7733277 | 0.049 | 0.309 | 0       | 4 | WFDC2   | Endothelial cells |
| 0         | -1.0082145 | 0.032 | 0.254 | 0       | 4 | MT1G    | Endothelial cells |
| 4.13E-163 | -0.2770719 | 0.155 | 0.31  | 9E-159  | 4 | S100A4  | Endothelial cells |
| 1.41E-271 | -0.3503217 | 0.138 | 0.344 | 3E-267  | 4 | CTSD    | Endothelial cells |
| 7.42E-119 | -0.4036087 | 0.057 | 0.161 | 2E-114  | 4 | LYZ     | Endothelial cells |
| 6.926E-41 | -0.2603464 | 0.068 | 0.119 | 1.5E-36 | 4 | C1QA    | Endothelial cells |
| 1.13E-134 | -0.255511  | 0.208 | 0.346 | 3E-130  | 4 | PSAP    | Endothelial cells |
| 0         | -0.3309655 | 0.215 | 0.459 | 0       | 4 | TXNIP   | Endothelial cells |
| 2.63E-107 | -0.414803  | 0.067 | 0.169 | 6E-103  | 4 | IGFBP5  | Endothelial cells |
| 2.63E-273 | -0.3481789 | 0.188 | 0.393 | 6E-269  | 4 | CYBA    | Endothelial cells |
| 1.91E-236 | -0.5668607 | 0.104 | 0.287 | 4E-232  | 4 | MT1X    | Endothelial cells |
| 0         | -0.2691986 | 1     | 1     | 0       | 4 | MT-CO2  | Endothelial cells |
| 1.19E-240 | -0.4252161 | 0.414 | 0.585 | 3E-236  | 4 | SAT1    | Endothelial cells |
| 0         | -0.3048213 | 1     | 0.999 | 0       | 4 | MT-ND4  | Endothelial cells |
| 6.61E-266 | -0.3216472 | 0.899 | 0.926 | 1E-261  | 4 | MT-ND5  | Endothelial cells |
| 0         | -0.3132029 | 0.997 | 0.994 | 0       | 4 | MT-ATP6 | Endothelial cells |
| 2.49E-79  | -0.4222835 | 0.421 | 0.518 | 5.5E-75 | 4 | MT2A    | Endothelial cells |
| 0         | -0.3523809 | 0.997 | 0.995 | 0       | 4 | MT-ND2  | Endothelial cells |
| 0         | -0.3575502 | 1     | 1     | 0       | 4 | MT-CO1  | Endothelial cells |
| 0         | -1.2045638 | 0.127 | 0.397 | 0       | 4 | SPP1    | Endothelial cells |
| 5.48E-229 | -0.4263393 | 0.756 | 0.804 | 1E-224  | 4 | FTH1    | Endothelial cells |
| 0         | -0.5490082 | 0.644 | 0.815 | 0       | 4 | MT-ND4L | Endothelial cells |
| 0         | -0.4449964 | 1     | 1     | 0       | 4 | MT-CO3  | Endothelial cells |

|           |            |       |       |         |   |          |                                |
|-----------|------------|-------|-------|---------|---|----------|--------------------------------|
| 0         | -0.4706189 | 0.999 | 0.999 | 0       | 4 | MT-ND3   | Endothelial cells              |
| 0         | -0.5109134 | 0.951 | 0.965 | 0       | 4 | MT-ND1   | Endothelial cells              |
| 6.881E-70 | -0.6424978 | 0.789 | 0.787 | 1.5E-65 | 4 | FTL      | Endothelial cells              |
| 5.111E-14 | -1.2880197 | 0.107 | 0.079 | 1.1E-09 | 4 | IGLC3    | Endothelial cells              |
| 2.333E-13 | -1.4691255 | 0.118 | 0.088 | 5.2E-09 | 4 | IGLC2    | Endothelial cells              |
| 1.61E-34  | -1.7768793 | 0.25  | 0.176 | 3.6E-30 | 4 | IGKC     | Endothelial cells              |
| 0         | 1.2988011  | 0.541 | 0.037 | 0       | 5 | S100A8   | Immune/classical monocytes, DC |
| 0         | 0.77529844 | 0.456 | 0.029 | 0       | 5 | IL1B     | Immune/classical monocytes, DC |
| 0         | 1.03210169 | 0.58  | 0.063 | 0       | 5 | S100A9   | Immune/classical monocytes, DC |
| 0         | 1.3199107  | 0.796 | 0.116 | 0       | 5 | LYZ      | Immune/classical monocytes, DC |
| 0         | 0.34345819 | 0.306 | 0.013 | 0       | 5 | FCN1     | Immune/classical monocytes, DC |
| 0         | 0.75152774 | 0.614 | 0.074 | 0       | 5 | LST1     | Immune/classical monocytes, DC |
| 0         | 0.7501729  | 0.555 | 0.07  | 0       | 5 | RP11-114 | Immune/classical monocytes, DC |
| 0         | 0.49223128 | 0.367 | 0.033 | 0       | 5 | BCL2A1   | Immune/classical monocytes, DC |
| 0         | 0.30807134 | 0.168 | 0.01  | 0       | 5 | EREG     | Immune/classical monocytes, DC |
| 0         | 0.25441654 | 0.206 | 0.011 | 0       | 5 | LINC0127 | Immune/classical monocytes, DC |
| 0         | 0.96055    | 0.789 | 0.16  | 0       | 5 | AIF1     | Immune/classical monocytes, DC |
| 0         | 0.91719826 | 0.809 | 0.158 | 0       | 5 | TYROBP   | Immune/classical monocytes, DC |
| 0         | 0.82617617 | 0.712 | 0.126 | 0       | 5 | FCER1G   | Immune/classical monocytes, DC |
| 0         | 0.70639766 | 0.667 | 0.122 | 0       | 5 | CTSS     | Immune/classical monocytes, DC |
| 0         | 0.49045583 | 0.436 | 0.056 | 0       | 5 | MNDA     | Immune/classical monocytes, DC |
| 0         | 0.60517504 | 0.342 | 0.056 | 0       | 5 | CXCL8    | Immune/classical monocytes, DC |
| 0         | 0.72695054 | 0.654 | 0.145 | 0       | 5 | NAMPT    | Immune/classical monocytes, DC |
| 0         | 0.83886793 | 0.392 | 0.104 | 0       | 5 | CCL3     | Immune/classical monocytes, DC |
| 0         | 0.29671326 | 0.296 | 0.028 | 0       | 5 | CSTA     | Immune/classical monocytes, DC |
| 0         | 0.42204692 | 0.327 | 0.045 | 0       | 5 | VCAN     | Immune/classical monocytes, DC |
| 0         | 0.89798607 | 0.828 | 0.299 | 0       | 5 | SRGN     | Immune/classical monocytes, DC |
| 0         | 0.67380842 | 0.438 | 0.129 | 0       | 5 | CXCL2    | Immune/classical monocytes, DC |
| 0         | 0.79382336 | 0.758 | 0.273 | 0       | 5 | S100A4   | Immune/classical monocytes, DC |
| 0         | 0.46409761 | 0.267 | 0.058 | 0       | 5 | CXCL3    | Immune/classical monocytes, DC |
| 0         | 0.28479371 | 0.277 | 0.037 | 0       | 5 | PLAUR    | Immune/classical monocytes, DC |
| 0         | 0.32163029 | 0.334 | 0.052 | 0       | 5 | CYBB     | Immune/classical monocytes, DC |
| 0         | 0.82066165 | 0.859 | 0.347 | 0       | 5 | HLA-DRA  | Immune/classical monocytes, DC |
| 0         | 0.40419543 | 0.229 | 0.047 | 0       | 5 | CCL3L3   | Immune/classical monocytes, DC |
| 0         | 0.48252656 | 0.454 | 0.113 | 0       | 5 | RGS2     | Immune/classical monocytes, DC |
| 0         | 0.48832119 | 0.535 | 0.136 | 0       | 5 | COTL1    | Immune/classical monocytes, DC |
| 0         | 0.34536406 | 0.362 | 0.072 | 0       | 5 | CD83     | Immune/classical monocytes, DC |
| 0         | 0.30129864 | 0.332 | 0.058 | 0       | 5 | C1orf162 | Immune/classical monocytes, DC |
| 0         | 0.72143282 | 0.654 | 0.277 | 0       | 5 | NFKBIA   | Immune/classical monocytes, DC |
| 0         | 0.29556292 | 0.307 | 0.054 | 0       | 5 | PLEK     | Immune/classical monocytes, DC |
| 0         | 0.29813438 | 0.302 | 0.054 | 0       | 5 | MS4A7    | Immune/classical monocytes, DC |
| 0         | 0.26482321 | 0.275 | 0.046 | 0       | 5 | FAM26F   | Immune/classical monocytes, DC |
| 0         | 0.37497984 | 0.396 | 0.094 | 0       | 5 | MAFB     | Immune/classical monocytes, DC |
| 0         | 0.88052987 | 0.886 | 0.496 | 0       | 5 | DUSP1    | Immune/classical monocytes, DC |
| 0         | 0.3553528  | 0.38  | 0.088 | 0       | 5 | MS4A6A   | Immune/classical monocytes, DC |
| 0         | 0.89883039 | 0.926 | 0.553 | 0       | 5 | SAT1     | Immune/classical monocytes, DC |
| 0         | 0.2834232  | 0.298 | 0.058 | 0       | 5 | FCGR3A   | Immune/classical monocytes, DC |
| 0         | 0.5180618  | 0.556 | 0.212 | 0       | 5 | SOD2     | Immune/classical monocytes, DC |

|           |            |       |       |        |   |          |                                |
|-----------|------------|-------|-------|--------|---|----------|--------------------------------|
| 0         | 0.5180618  | 0.556 | 0.212 | 0      | 5 | SOD2     | Immune/classical monocytes, DC |
| 0         | 0.57763172 | 0.718 | 0.313 | 0      | 5 | SH3BGR   | Immune/classical monocytes, DC |
| 0         | 0.42244902 | 0.436 | 0.141 | 0      | 5 | NR4A2    | Immune/classical monocytes, DC |
| 0         | 0.30626277 | 0.366 | 0.086 | 0      | 5 | LCP1     | Immune/classical monocytes, DC |
| 0         | 0.44168804 | 0.456 | 0.155 | 0      | 5 | TNFAIP3  | Immune/classical monocytes, DC |
| 0         | 0.92172479 | 0.981 | 0.776 | 0      | 5 | FTL      | Immune/classical monocytes, DC |
| 0         | 0.57238336 | 0.716 | 0.36  | 0      | 5 | ZFP36    | Immune/classical monocytes, DC |
| 0         | 0.82036021 | 0.923 | 0.669 | 0      | 5 | FOS      | Immune/classical monocytes, DC |
| 0         | 0.28705013 | 0.352 | 0.091 | 0      | 5 | ZEB2     | Immune/classical monocytes, DC |
| 0         | 0.88138644 | 0.975 | 0.791 | 0      | 5 | FTH1     | Immune/classical monocytes, DC |
| 0         | 0.30043362 | 0.363 | 0.101 | 0      | 5 | FGL2     | Immune/classical monocytes, DC |
| 0         | 0.5275006  | 0.725 | 0.36  | 0      | 5 | CYBA     | Immune/classical monocytes, DC |
| 0         | 0.31233912 | 0.393 | 0.116 | 0      | 5 | TYMP     | Immune/classical monocytes, DC |
| 0         | 0.33050739 | 0.268 | 0.085 | 0      | 5 | AREG     | Immune/classical monocytes, DC |
| 0         | 0.29425178 | 0.193 | 0.055 | 0      | 5 | C15orf48 | Immune/classical monocytes, DC |
| 0         | 0.31818229 | 0.392 | 0.128 | 0      | 5 | CEBPB    | Immune/classical monocytes, DC |
| 0         | 0.41341884 | 0.438 | 0.187 | 0      | 5 | IER3     | Immune/classical monocytes, DC |
| 0         | 0.36537297 | 0.542 | 0.216 | 0      | 5 | HLA-DPB1 | Immune/classical monocytes, DC |
| 0         | 0.38746344 | 0.288 | 0.123 | 0      | 5 | CCL4     | Immune/classical monocytes, DC |
| 0         | 0.50053831 | 0.74  | 0.409 | 0      | 5 | CST3     | Immune/classical monocytes, DC |
| 0         | 0.34530861 | 0.416 | 0.166 | 0      | 5 | SOCS3    | Immune/classical monocytes, DC |
| 0         | 0.2784709  | 0.377 | 0.122 | 0      | 5 | FYB      | Immune/classical monocytes, DC |
| 0         | 0.30453873 | 0.41  | 0.147 | 0      | 5 | CTSB     | Immune/classical monocytes, DC |
| 0         | 0.71784004 | 0.972 | 0.824 | 0      | 5 | ACTB     | Immune/classical monocytes, DC |
| 0         | 0.35723616 | 0.468 | 0.204 | 0      | 5 | NFKBIZ   | Immune/classical monocytes, DC |
| 0         | 0.31269616 | 0.424 | 0.167 | 0      | 5 | CD52     | Immune/classical monocytes, DC |
| 0         | 0.28127618 | 0.344 | 0.122 | 0      | 5 | KLF4     | Immune/classical monocytes, DC |
| 0         | 0.38568535 | 0.712 | 0.347 | 0      | 5 | LGALS1   | Immune/classical monocytes, DC |
| 0         | 0.32356745 | 0.449 | 0.185 | 0      | 5 | GLUL     | Immune/classical monocytes, DC |
| 0         | 0.32026987 | 0.469 | 0.194 | 0      | 5 | HLA-DPA1 | Immune/classical monocytes, DC |
| 0         | 0.45586419 | 0.758 | 0.448 | 0      | 5 | PABPC1   | Immune/classical monocytes, DC |
| 0         | 0.2761723  | 0.351 | 0.128 | 0      | 5 | CD44     | Immune/classical monocytes, DC |
| 0         | 0.26957116 | 0.401 | 0.146 | 0      | 5 | PTPRC    | Immune/classical monocytes, DC |
| 0         | 0.32961343 | 0.473 | 0.211 | 0      | 5 | TIMP1    | Immune/classical monocytes, DC |
| 0         | 0.62735361 | 0.97  | 0.854 | 0      | 5 | NEAT1    | Immune/classical monocytes, DC |
| 0         | 0.38673556 | 0.643 | 0.36  | 0      | 5 | OAZ1     | Immune/classical monocytes, DC |
| 0         | 0.25897029 | 0.365 | 0.139 | 0      | 5 | CMTM6    | Immune/classical monocytes, DC |
| 0         | 0.35201828 | 0.577 | 0.299 | 0      | 5 | NPC2     | Immune/classical monocytes, DC |
| 0         | 0.3595288  | 0.606 | 0.321 | 0      | 5 | PSAP     | Immune/classical monocytes, DC |
| 0         | 0.3747203  | 0.771 | 0.442 | 0      | 5 | CD74     | Immune/classical monocytes, DC |
| 0         | 0.34478112 | 0.559 | 0.305 | 0      | 5 | GPX1     | Immune/classical monocytes, DC |
| 0         | 0.44529032 | 0.802 | 0.582 | 0      | 5 | H3F3A    | Immune/classical monocytes, DC |
| 0         | 0.48026458 | 0.994 | 0.88  | 0      | 5 | TMSB4X   | Immune/classical monocytes, DC |
| 0         | 0.41457216 | 0.813 | 0.626 | 0      | 5 | H3F3B    | Immune/classical monocytes, DC |
| 0         | 0.28286155 | 0.477 | 0.254 | 0      | 5 | MCL1     | Immune/classical monocytes, DC |
| 1.72E-296 | 0.36565353 | 0.651 | 0.455 | 4E-292 | 5 | HSPA1A   | Immune/classical monocytes, DC |
| 0         | 0.32277752 | 0.58  | 0.358 | 0      | 5 | FOSB     | Immune/classical monocytes, DC |
| 1.09E-275 | 0.26507783 | 0.355 | 0.181 | 2E-271 | 5 | SGK1     | Immune/classical monocytes, DC |

|           |            |       |       |         |   |         |                                |
|-----------|------------|-------|-------|---------|---|---------|--------------------------------|
| 0         | 0.25597168 | 0.409 | 0.211 | 0       | 5 | PNRC1   | Immune/classical monocytes, DC |
| 1.32E-256 | 0.37088935 | 0.639 | 0.478 | 3E-252  | 5 | HSPA1B  | Immune/classical monocytes, DC |
| 8.94E-246 | 0.32654052 | 0.561 | 0.392 | 2E-241  | 5 | ZFP36L1 | Immune/classical monocytes, DC |
| 7.79E-254 | 0.32391104 | 0.605 | 0.421 | 2E-249  | 5 | KLF6    | Immune/classical monocytes, DC |
| 0         | 0.31124632 | 0.677 | 0.463 | 0       | 5 | PFN1    | Immune/classical monocytes, DC |
| 0         | 0.2737323  | 0.585 | 0.353 | 0       | 5 | VIM     | Immune/classical monocytes, DC |
| 0         | 0.42942987 | 0.993 | 0.948 | 0       | 5 | B2M     | Immune/classical monocytes, DC |
| 0         | 0.41293742 | 0.992 | 0.938 | 0       | 5 | RPL39   | Immune/classical monocytes, DC |
| 0         | 0.36510443 | 0.98  | 0.852 | 0       | 5 | TMSB10  | Immune/classical monocytes, DC |
| 0         | 0.30799275 | 0.774 | 0.604 | 0       | 5 | UBA52   | Immune/classical monocytes, DC |
| 0         | 0.31546061 | 0.798 | 0.645 | 0       | 5 | RPS9    | Immune/classical monocytes, DC |
| 0         | 0.30912022 | 0.78  | 0.635 | 0       | 5 | EIF1    | Immune/classical monocytes, DC |
| 5.66E-276 | 0.27662115 | 0.657 | 0.481 | 1E-271  | 5 | PFDN5   | Immune/classical monocytes, DC |
| 0         | 0.32592126 | 0.918 | 0.795 | 0       | 5 | TPT1    | Immune/classical monocytes, DC |
| 6.3E-132  | 0.28117788 | 0.517 | 0.392 | 1E-127  | 5 | EGR1    | Immune/classical monocytes, DC |
| 0         | 0.3066132  | 0.836 | 0.703 | 0       | 5 | RPS13   | Immune/classical monocytes, DC |
| 3.12E-234 | 0.30554327 | 0.814 | 0.704 | 7E-230  | 5 | HSP90AA | Immune/classical monocytes, DC |
| 0         | 0.3012537  | 0.92  | 0.794 | 0       | 5 | RPL28   | Immune/classical monocytes, DC |
| 0         | 0.28654073 | 0.868 | 0.745 | 0       | 5 | RPS24   | Immune/classical monocytes, DC |
| 2.49E-287 | 0.25666113 | 0.878 | 0.773 | 5E-283  | 5 | ATP5E   | Immune/classical monocytes, DC |
| 2.33E-209 | -0.2653335 | 0.028 | 0.183 | 5E-205  | 5 | TIMP3   | Immune/classical monocytes, DC |
| 0         | -0.2946883 | 0.046 | 0.3   | 0       | 5 | NGFRAP1 | Immune/classical monocytes, DC |
| 1.26E-202 | -0.3347884 | 0.024 | 0.172 | 3E-198  | 5 | CXCL14  | Immune/classical monocytes, DC |
| 7.96E-203 | -0.2615471 | 0.036 | 0.191 | 2E-198  | 5 | CALD1   | Immune/classical monocytes, DC |
| 2.754E-92 | -0.2644541 | 0.023 | 0.104 | 6.1E-88 | 5 | MT1H    | Immune/classical monocytes, DC |
| 2.11E-169 | -0.3107156 | 0.032 | 0.166 | 5E-165  | 5 | MMP7    | Immune/classical monocytes, DC |
| 2.43E-271 | -0.4056149 | 0.035 | 0.227 | 5E-267  | 5 | CRYAB   | Immune/classical monocytes, DC |
| 1.77E-287 | -0.2599707 | 0.068 | 0.28  | 4E-283  | 5 | CD59    | Immune/classical monocytes, DC |
| 7.48E-304 | -0.2582544 | 0.079 | 0.303 | 2E-299  | 5 | APP     | Immune/classical monocytes, DC |
| 1.71E-226 | -0.542173  | 0.023 | 0.184 | 4E-222  | 5 | S100A2  | Immune/classical monocytes, DC |
| 3.34E-167 | -0.263631  | 0.05  | 0.188 | 7E-163  | 5 | SPARC   | Immune/classical monocytes, DC |
| 0         | -0.4886142 | 0.057 | 0.361 | 0       | 5 | CD24    | Immune/classical monocytes, DC |
| 0         | -0.5598433 | 0.047 | 0.339 | 0       | 5 | FXYD2   | Immune/classical monocytes, DC |
| 4.55E-176 | -0.283244  | 0.059 | 0.208 | 1E-171  | 5 | GPX3    | Immune/classical monocytes, DC |
| 8.39E-273 | -0.4023446 | 0.05  | 0.248 | 2E-268  | 5 | MT1E    | Immune/classical monocytes, DC |
| 0         | -0.3073991 | 0.084 | 0.318 | 0       | 5 | CD9     | Immune/classical monocytes, DC |
| 2.235E-98 | -0.264059  | 0.048 | 0.142 | 4.9E-94 | 5 | SPARCL1 | Immune/classical monocytes, DC |
| 2.58E-167 | -0.461876  | 0.036 | 0.171 | 6E-163  | 5 | IGFBP5  | Immune/classical monocytes, DC |
| 7.89E-151 | -0.3763015 | 0.044 | 0.17  | 2E-146  | 5 | MGP     | Immune/classical monocytes, DC |
| 2.165E-96 | -0.2856226 | 0.05  | 0.144 | 4.8E-92 | 5 | CTGF    | Immune/classical monocytes, DC |
| 0         | -0.7707749 | 0.044 | 0.32  | 0       | 5 | DEFB1   | Immune/classical monocytes, DC |
| 0         | -0.5636526 | 0.063 | 0.306 | 0       | 5 | CLU     | Immune/classical monocytes, DC |
| 0         | -0.7636344 | 0.054 | 0.308 | 0       | 5 | WFDC2   | Immune/classical monocytes, DC |
| 0         | -0.4300156 | 0.141 | 0.44  | 0       | 5 | DSTN    | Immune/classical monocytes, DC |
| 0         | -0.6980896 | 0.066 | 0.316 | 0       | 5 | ADIRF   | Immune/classical monocytes, DC |
| 0         | -0.7941395 | 0.105 | 0.503 | 0       | 5 | IGFBP7  | Immune/classical monocytes, DC |
| 0         | -0.4288192 | 0.197 | 0.451 | 0       | 5 | HSPB1   | Immune/classical monocytes, DC |
| 0         | -0.869769  | 0.089 | 0.399 | 0       | 5 | ATP1B1  | Immune/classical monocytes, DC |

|           |            |       |       |         |   |          |                                |
|-----------|------------|-------|-------|---------|---|----------|--------------------------------|
| 7.79E-149 | -0.4891552 | 0.137 | 0.284 | 2E-144  | 5 | MT1X     | Immune/classical monocytes, DC |
| 6.86E-149 | -0.2569771 | 1     | 0.999 | 2E-144  | 5 | MALAT1   | Immune/classical monocytes, DC |
| 2.76E-206 | -0.8631514 | 0.079 | 0.25  | 6E-202  | 5 | MT1G     | Immune/classical monocytes, DC |
| 2.52E-223 | -0.3565924 | 0.707 | 0.811 | 6E-219  | 5 | MT-ND4L  | Immune/classical monocytes, DC |
| 0         | -0.3127258 | 0.99  | 0.994 | 0       | 5 | MT-ATP6  | Immune/classical monocytes, DC |
| 9.22E-306 | -0.3390707 | 0.856 | 0.929 | 2E-301  | 5 | MT-ND5   | Immune/classical monocytes, DC |
| 0         | -0.3387378 | 0.978 | 0.993 | 0       | 5 | MT-CYB   | Immune/classical monocytes, DC |
| 0         | -0.3574925 | 1     | 1     | 0       | 5 | MT-CO2   | Immune/classical monocytes, DC |
| 0         | -0.367585  | 0.984 | 0.996 | 0       | 5 | MT-ND2   | Immune/classical monocytes, DC |
| 1.18E-99  | -0.4781329 | 0.402 | 0.519 | 2.6E-95 | 5 | MT2A     | Immune/classical monocytes, DC |
| 0         | -0.3742743 | 0.999 | 0.999 | 0       | 5 | MT-ND4   | Immune/classical monocytes, DC |
| 0         | -0.3878017 | 0.934 | 0.966 | 0       | 5 | MT-ND1   | Immune/classical monocytes, DC |
| 0         | -0.4026105 | 1     | 1     | 0       | 5 | MT-CO1   | Immune/classical monocytes, DC |
| 0         | -0.4162388 | 1     | 1     | 0       | 5 | MT-CO3   | Immune/classical monocytes, DC |
| 1.22E-300 | -1.0628104 | 0.166 | 0.394 | 3E-296  | 5 | SPP1     | Immune/classical monocytes, DC |
| 0         | -0.4523476 | 0.999 | 0.999 | 0       | 5 | MT-ND3   | Immune/classical monocytes, DC |
| 1.399E-12 | -0.5722243 | 0.112 | 0.082 | 3.1E-08 | 5 | IGHG3    | Immune/classical monocytes, DC |
| 1.486E-27 | -1.2570543 | 0.12  | 0.078 | 3.3E-23 | 5 | IGLC3    | Immune/classical monocytes, DC |
| 4.81E-45  | -1.3659768 | 0.143 | 0.087 | 1.1E-40 | 5 | IGLC2    | Immune/classical monocytes, DC |
| 4.14E-142 | -1.6540578 | 0.316 | 0.173 | 9E-138  | 5 | IGKC     | Immune/classical monocytes, DC |
| 0         | 0.44678486 | 0.179 | 0.006 | 0       | 6 | IL1RL1   | Endothelial cells              |
| 0         | 1.84175832 | 0.785 | 0.13  | 0       | 6 | IGFBP5   | Endothelial cells              |
| 0         | 0.36423441 | 0.276 | 0.011 | 0       | 6 | CRHBP    | Endothelial cells              |
| 0         | 0.89418125 | 0.604 | 0.066 | 0       | 6 | EMCN     | Endothelial cells              |
| 0         | 0.494256   | 0.371 | 0.026 | 0       | 6 | PLAT     | Endothelial cells              |
| 0         | 0.60578072 | 0.479 | 0.052 | 0       | 6 | SLC9A3R2 | Endothelial cells              |
| 0         | 0.8979945  | 0.734 | 0.148 | 0       | 6 | IFI27    | Endothelial cells              |
| 0         | 0.92492518 | 0.695 | 0.146 | 0       | 6 | TIMP3    | Endothelial cells              |
| 0         | 0.50376683 | 0.442 | 0.053 | 0       | 6 | PLPP1    | Endothelial cells              |
| 0         | 0.30860916 | 0.31  | 0.027 | 0       | 6 | PTPRB    | Endothelial cells              |
| 0         | 0.27891517 | 0.273 | 0.022 | 0       | 6 | MEIS2    | Endothelial cells              |
| 0         | 0.37954563 | 0.345 | 0.039 | 0       | 6 | SDPR     | Endothelial cells              |
| 0         | 0.55182325 | 0.527 | 0.088 | 0       | 6 | EPAS1    | Endothelial cells              |
| 0         | 0.40704326 | 0.383 | 0.048 | 0       | 6 | RAMP2    | Endothelial cells              |
| 0         | 0.3156949  | 0.304 | 0.03  | 0       | 6 | FLT1     | Endothelial cells              |
| 0         | 0.41930041 | 0.349 | 0.05  | 0       | 6 | PLPP3    | Endothelial cells              |
| 0         | 0.29287156 | 0.286 | 0.029 | 0       | 6 | LDB2     | Endothelial cells              |
| 0         | 0.59745605 | 0.522 | 0.113 | 0       | 6 | TGFBR2   | Endothelial cells              |
| 0         | 0.5164134  | 0.432 | 0.089 | 0       | 6 | SPRY1    | Endothelial cells              |
| 0         | 0.37259336 | 0.397 | 0.066 | 0       | 6 | EGFL7    | Endothelial cells              |
| 0         | 0.52146445 | 0.558 | 0.135 | 0       | 6 | GNG11    | Endothelial cells              |
| 0         | 0.31204595 | 0.336 | 0.049 | 0       | 6 | PCAT19   | Endothelial cells              |
| 0         | 0.44064332 | 0.434 | 0.104 | 0       | 6 | TM4SF1   | Endothelial cells              |
| 0         | 0.27969702 | 0.274 | 0.042 | 0       | 6 | RAMP3    | Endothelial cells              |
| 0         | 0.25749572 | 0.142 | 0.021 | 0       | 6 | ESM1     | Endothelial cells              |
| 0         | 0.42499816 | 0.514 | 0.126 | 0       | 6 | RNASE1   | Endothelial cells              |
| 0         | 0.7606348  | 0.789 | 0.371 | 0       | 6 | IFITM3   | Endothelial cells              |
| 0         | 0.31521966 | 0.368 | 0.077 | 0       | 6 | ADGRF5   | Endothelial cells              |

|           |            |       |       |         |   |          |                   |
|-----------|------------|-------|-------|---------|---|----------|-------------------|
| 0         | 0.33638039 | 0.279 | 0.068 | 0       | 6 | AQP1     | Endothelial cells |
| 0         | 0.37171335 | 0.457 | 0.14  | 0       | 6 | SPTBN1   | Endothelial cells |
| 0         | 0.25014595 | 0.269 | 0.056 | 0       | 6 | SH3BP5   | Endothelial cells |
| 0         | 0.31853147 | 0.288 | 0.077 | 0       | 6 | BEX5     | Endothelial cells |
| 0         | 0.36543422 | 0.513 | 0.163 | 0       | 6 | SPARC    | Endothelial cells |
| 0         | 0.27228613 | 0.329 | 0.078 | 0       | 6 | PECAM1   | Endothelial cells |
| 0         | 0.26053529 | 0.291 | 0.067 | 0       | 6 | PBX1     | Endothelial cells |
| 0         | 0.31430407 | 0.409 | 0.116 | 0       | 6 | A2M      | Endothelial cells |
| 0         | 0.54146685 | 0.81  | 0.443 | 0       | 6 | CD74     | Endothelial cells |
| 0         | 0.45238452 | 0.6   | 0.275 | 0       | 6 | HLA-E    | Endothelial cells |
| 0         | 0.25081522 | 0.309 | 0.08  | 0       | 6 | ENG      | Endothelial cells |
| 0         | 0.31042694 | 0.459 | 0.148 | 0       | 6 | MGP      | Endothelial cells |
| 0         | 0.44378708 | 0.488 | 0.233 | 0       | 6 | HES1     | Endothelial cells |
| 0         | 0.29724787 | 0.386 | 0.13  | 0       | 6 | IL6ST    | Endothelial cells |
| 0         | 0.32570238 | 0.439 | 0.163 | 0       | 6 | VAMP5    | Endothelial cells |
| 0         | 0.26280339 | 0.331 | 0.1   | 0       | 6 | SEC14L1  | Endothelial cells |
| 0         | 0.28016065 | 0.309 | 0.103 | 0       | 6 | ID1      | Endothelial cells |
| 0         | 0.34680568 | 0.503 | 0.208 | 0       | 6 | HLA-DRB1 | Endothelial cells |
| 0         | 0.3509944  | 0.418 | 0.189 | 0       | 6 | TSC22D1  | Endothelial cells |
| 0         | 0.37162089 | 0.517 | 0.254 | 0       | 6 | IFITM2   | Endothelial cells |
| 0         | 0.25941288 | 0.342 | 0.119 | 0       | 6 | BST2     | Endothelial cells |
| 0         | 0.27939054 | 0.4   | 0.17  | 0       | 6 | CNN3     | Endothelial cells |
| 0         | 0.28429045 | 0.384 | 0.171 | 0       | 6 | CALD1    | Endothelial cells |
| 0         | 0.39370594 | 0.616 | 0.38  | 0       | 6 | HLA-C    | Endothelial cells |
| 0         | 0.41712389 | 0.756 | 0.511 | 0       | 6 | HLA-B    | Endothelial cells |
| 0         | 0.31672265 | 0.524 | 0.278 | 0       | 6 | APP      | Endothelial cells |
| 8.46E-283 | 0.38037479 | 0.71  | 0.502 | 2E-278  | 6 | MT2A     | Endothelial cells |
| 7.88E-236 | 0.36167309 | 0.611 | 0.448 | 2E-231  | 6 | HLA-A    | Endothelial cells |
| 0         | 0.30965336 | 0.997 | 0.948 | 0       | 6 | B2M      | Endothelial cells |
| 8.94E-177 | -0.3041121 | 0.022 | 0.166 | 2E-172  | 6 | FCER1G   | Endothelial cells |
| 1.07E-120 | -0.3264624 | 0.02  | 0.126 | 2E-116  | 6 | CCL3     | Endothelial cells |
| 2.98E-112 | -0.3172187 | 0.021 | 0.121 | 7E-108  | 6 | C1QA     | Endothelial cells |
| 1.4E-164  | -0.3098326 | 0.041 | 0.186 | 3E-160  | 6 | RGS1     | Endothelial cells |
| 4.63E-162 | -0.4503602 | 0.025 | 0.162 | 1E-157  | 6 | LYZ      | Endothelial cells |
| 1.12E-107 | -0.2885929 | 0.034 | 0.138 | 2E-103  | 6 | CCL4     | Endothelial cells |
| 1.93E-188 | -0.3588717 | 0.043 | 0.203 | 4E-184  | 6 | TYROBP   | Endothelial cells |
| 1.37E-169 | -0.3437866 | 0.051 | 0.203 | 3E-165  | 6 | AIF1     | Endothelial cells |
| 3.94E-102 | -0.2940266 | 0.056 | 0.164 | 8.7E-98 | 6 | MMP7     | Endothelial cells |
| 1.09E-84  | -0.2665742 | 0.07  | 0.169 | 2.4E-80 | 6 | CXCL14   | Endothelial cells |
| 0         | -0.4298157 | 0.105 | 0.356 | 0       | 6 | CD24     | Endothelial cells |
| 2.19E-235 | -0.3585677 | 0.133 | 0.342 | 5E-231  | 6 | CTSD     | Endothelial cells |
| 1.09E-151 | -0.2898902 | 0.162 | 0.323 | 2E-147  | 6 | NPC2     | Endothelial cells |
| 2.429E-90 | -0.3012743 | 0.111 | 0.221 | 5.4E-86 | 6 | CRYAB    | Endothelial cells |
| 7.26E-116 | -0.4769114 | 0.062 | 0.181 | 2E-111  | 6 | S100A2   | Endothelial cells |
| 1.14E-177 | -0.3102909 | 0.212 | 0.389 | 3E-173  | 6 | CYBA     | Endothelial cells |
| 2.66E-227 | -0.3369296 | 0.228 | 0.442 | 6E-223  | 6 | KLF6     | Endothelial cells |
| 8.12E-211 | -0.4197199 | 0.14  | 0.332 | 2E-206  | 6 | FXD2     | Endothelial cells |
| 3.37E-247 | -0.3963236 | 0.221 | 0.439 | 7E-243  | 6 | CST3     | Endothelial cells |

|           |            |       |       |         |   |         |                   |
|-----------|------------|-------|-------|---------|---|---------|-------------------|
| 1.33E-284 | -0.7015343 | 0.09  | 0.315 | 3E-280  | 6 | DEFB1   | Endothelial cells |
| 2.68E-165 | -0.4622137 | 0.132 | 0.3   | 6E-161  | 6 | CLU     | Endothelial cells |
| 2.23E-197 | -0.6172793 | 0.119 | 0.302 | 5E-193  | 6 | WFDC2   | Endothelial cells |
| 1.32E-302 | -0.2952522 | 0.931 | 0.968 | 3E-298  | 6 | RPL41   | Endothelial cells |
| 5.823E-59 | -0.3029075 | 0.77  | 0.803 | 1.3E-54 | 6 | FTH1    | Endothelial cells |
| 0         | -0.5366603 | 0.329 | 0.588 | 0       | 6 | SAT1    | Endothelial cells |
| 1.28E-287 | -0.7460523 | 0.164 | 0.393 | 3E-283  | 6 | ATP1B1  | Endothelial cells |
| 2.52E-141 | -0.34397   | 0.771 | 0.835 | 6E-137  | 6 | ACTB    | Endothelial cells |
| 3.35E-208 | -0.4280887 | 0.532 | 0.691 | 7E-204  | 6 | FOS     | Endothelial cells |
| 2.68E-300 | -0.3988665 | 0.895 | 0.944 | 6E-296  | 6 | RPL39   | Endothelial cells |
| 5.43E-171 | -2.1192833 | 0.039 | 0.188 | 1E-166  | 6 | IGKC    | Endothelial cells |
| 0.000103  | -0.4781632 | 0.272 | 0.239 | 1       | 6 | MT1G    | Endothelial cells |
| 2.35E-188 | -1.0393427 | 0.217 | 0.389 | 5E-184  | 6 | SPP1    | Endothelial cells |
| 4.39E-139 | -0.7796854 | 0.725 | 0.791 | 1E-134  | 6 | FTL     | Endothelial cells |
| 0         | 1.54306648 | 0.833 | 0.058 | 0       | 7 | FXD4    | Principal cells   |
| 0         | 1.14273031 | 0.696 | 0.045 | 0       | 7 | AQP2    | Principal cells   |
| 0         | 0.75355247 | 0.594 | 0.045 | 0       | 7 | AQP3    | Principal cells   |
| 0         | 0.49296474 | 0.419 | 0.048 | 0       | 7 | STC1    | Principal cells   |
| 0         | 0.25063778 | 0.248 | 0.019 | 0       | 7 | PAPPA   | Principal cells   |
| 0         | 0.30774358 | 0.335 | 0.039 | 0       | 7 | SMIM22  | Principal cells   |
| 0         | 0.50150387 | 0.515 | 0.1   | 0       | 7 | KRT19   | Principal cells   |
| 0         | 0.31106597 | 0.344 | 0.049 | 0       | 7 | GATA3   | Principal cells   |
| 0         | 0.48404138 | 0.444 | 0.107 | 0       | 7 | TACSTD2 | Principal cells   |
| 0         | 0.34996642 | 0.405 | 0.072 | 0       | 7 | HSD11B2 | Principal cells   |
| 0         | 0.70330837 | 0.611 | 0.227 | 0       | 7 | HES1    | Principal cells   |
| 0         | 0.28877796 | 0.29  | 0.048 | 0       | 7 | ST6GAL1 | Principal cells   |
| 0         | 0.68903512 | 0.864 | 0.357 | 0       | 7 | ATP1B1  | Principal cells   |
| 0         | 0.39245532 | 0.429 | 0.108 | 0       | 7 | ELF3    | Principal cells   |
| 0         | 0.38502496 | 0.378 | 0.094 | 0       | 7 | GDF15   | Principal cells   |
| 0         | 0.31343628 | 0.377 | 0.078 | 0       | 7 | CA2     | Principal cells   |
| 0         | 0.33646294 | 0.404 | 0.093 | 0       | 7 | NDRG1   | Principal cells   |
| 0         | 0.38085566 | 0.484 | 0.138 | 0       | 7 | CDH16   | Principal cells   |
| 0         | 0.25573492 | 0.3   | 0.063 | 0       | 7 | PFKFB3  | Principal cells   |
| 0         | 0.32549136 | 0.424 | 0.119 | 0       | 7 | EPCAM   | Principal cells   |
| 0         | 0.25305429 | 0.318 | 0.074 | 0       | 7 | MECOM   | Principal cells   |
| 0         | 0.25281503 | 0.328 | 0.079 | 0       | 7 | SCIN    | Principal cells   |
| 0         | 0.44615043 | 0.754 | 0.323 | 0       | 7 | CD24    | Principal cells   |
| 0         | 0.27228605 | 0.367 | 0.11  | 0       | 7 | RALBP1  | Principal cells   |
| 0         | 0.2702579  | 0.386 | 0.119 | 0       | 7 | CAMK2N1 | Principal cells   |
| 0         | 0.33294487 | 0.692 | 0.273 | 0       | 7 | WFDC2   | Principal cells   |
| 0         | 0.37146949 | 0.597 | 0.269 | 0       | 7 | NGFRAP1 | Principal cells   |
| 0         | 0.29280126 | 0.443 | 0.173 | 0       | 7 | EMX2    | Principal cells   |
| 0         | 0.32266994 | 0.409 | 0.183 | 0       | 7 | ATF3    | Principal cells   |
| 0         | 0.34125834 | 0.604 | 0.29  | 0       | 7 | CD9     | Principal cells   |
| 0         | 0.31305188 | 0.412 | 0.183 | 0       | 7 | SOX4    | Principal cells   |
| 0         | 0.29027226 | 0.444 | 0.203 | 0       | 7 | BTG2    | Principal cells   |
| 0         | 0.41880271 | 0.711 | 0.475 | 0       | 7 | HSPA1B  | Principal cells   |
| 0         | 0.28180565 | 0.501 | 0.227 | 0       | 7 | WBP5    | Principal cells   |

|           |            |       |       |         |   |          |                 |
|-----------|------------|-------|-------|---------|---|----------|-----------------|
| 0         | 0.28834205 | 0.53  | 0.265 | 0       | 7 | MRPL33   | Principal cells |
| 2E-259    | 0.37398922 | 0.593 | 0.389 | 4E-255  | 7 | EGR1     | Principal cells |
| 0         | 0.25852481 | 0.461 | 0.213 | 0       | 7 | ARL6IP1  | Principal cells |
| 3.41E-271 | 0.35120556 | 0.647 | 0.426 | 8E-267  | 7 | HSPB1    | Principal cells |
| 0         | 0.28833683 | 0.579 | 0.314 | 0       | 7 | WSB1     | Principal cells |
| 0         | 0.4118876  | 0.97  | 0.796 | 0       | 7 | MT-ND4L  | Principal cells |
| 0         | 0.25678856 | 0.533 | 0.29  | 0       | 7 | RTN4     | Principal cells |
| 4.93E-294 | 0.29955477 | 0.626 | 0.398 | 1E-289  | 7 | JUND     | Principal cells |
| 0         | 0.27703644 | 0.622 | 0.375 | 0       | 7 | PPDPF    | Principal cells |
| 5.57E-183 | 0.27838339 | 0.475 | 0.306 | 1E-178  | 7 | IER2     | Principal cells |
| 0         | 0.39949416 | 0.998 | 0.962 | 0       | 7 | MT-ND1   | Principal cells |
| 2.19E-196 | 0.27074073 | 0.65  | 0.457 | 5E-192  | 7 | HSPA1A   | Principal cells |
| 1.78E-248 | 0.25992133 | 0.733 | 0.524 | 4E-244  | 7 | NDUFA4   | Principal cells |
| 0         | 0.36270559 | 1     | 1     | 0       | 7 | MT-CO1   | Principal cells |
| 3.04E-139 | 0.27274466 | 0.65  | 0.515 | 7E-135  | 7 | JUN      | Principal cells |
| 0         | 0.31745867 | 0.988 | 0.922 | 0       | 7 | MT-ND5   | Principal cells |
| 0         | 0.33294097 | 0.999 | 0.995 | 0       | 7 | MT-ND2   | Principal cells |
| 0         | 0.32599527 | 1     | 1     | 0       | 7 | MT-CO3   | Principal cells |
| 0         | 0.28126875 | 1     | 0.999 | 0       | 7 | MT-ND4   | Principal cells |
| 0         | 0.26803168 | 1     | 1     | 0       | 7 | MT-CO2   | Principal cells |
| 2.01E-305 | 0.25403328 | 1     | 0.991 | 4E-301  | 7 | MT-CYB   | Principal cells |
| 8.62E-250 | 0.25563592 | 1     | 0.999 | 2E-245  | 7 | MT-ND3   | Principal cells |
| 6.75E-123 | -0.2625107 | 0.003 | 0.104 | 1E-118  | 7 | C1QB     | Principal cells |
| 4.42E-139 | -0.3432256 | 0.007 | 0.122 | 1E-134  | 7 | C1QA     | Principal cells |
| 1.27E-190 | -0.3168213 | 0.013 | 0.167 | 3E-186  | 7 | FCER1G   | Principal cells |
| 5.91E-217 | -0.2874674 | 0.018 | 0.19  | 1E-212  | 7 | CD52     | Principal cells |
| 2.13E-133 | -0.3398898 | 0.012 | 0.126 | 5E-129  | 7 | CCL3     | Principal cells |
| 1.53E-168 | -0.3143258 | 0.02  | 0.162 | 3E-164  | 7 | CCL5     | Principal cells |
| 2.64E-137 | -0.3186695 | 0.018 | 0.138 | 6E-133  | 7 | CCL4     | Principal cells |
| 9.46E-226 | -0.3932003 | 0.024 | 0.204 | 2E-221  | 7 | TYROBP   | Principal cells |
| 1.1E-222  | -0.3906317 | 0.025 | 0.204 | 2E-218  | 7 | AIF1     | Principal cells |
| 3.32E-186 | -0.3337338 | 0.029 | 0.187 | 7E-182  | 7 | RGS1     | Principal cells |
| 6.3E-170  | -0.2855723 | 0.037 | 0.188 | 1E-165  | 7 | SPARC    | Principal cells |
| 1.12E-164 | -0.4635659 | 0.022 | 0.162 | 2E-160  | 7 | LYZ      | Principal cells |
| 0         | -0.5612611 | 0.039 | 0.344 | 0       | 7 | SRGN     | Principal cells |
| 4.45E-149 | -0.2784093 | 0.045 | 0.184 | 1E-144  | 7 | IFI27    | Principal cells |
| 7.98E-250 | -0.3504165 | 0.051 | 0.256 | 2E-245  | 7 | CXCR4    | Principal cells |
| 1.11E-180 | -0.3029593 | 0.054 | 0.217 | 2E-176  | 7 | HLA-DPA1 | Principal cells |
| 1.71E-223 | -0.3852619 | 0.055 | 0.244 | 4E-219  | 7 | HLA-DPB1 | Principal cells |
| 6.54E-204 | -0.309258  | 0.079 | 0.265 | 1E-199  | 7 | IL32     | Principal cells |
| 0         | -0.5161017 | 0.069 | 0.382 | 0       | 7 | VIM      | Principal cells |
| 7.37E-93  | -0.3139001 | 0.045 | 0.143 | 1.6E-88 | 7 | CTGF     | Principal cells |
| 7.135E-85 | -0.295238  | 0.048 | 0.141 | 1.6E-80 | 7 | SPARCL1  | Principal cells |
| 2.12E-183 | -0.4112741 | 0.064 | 0.234 | 5E-179  | 7 | TIMP1    | Principal cells |
| 3.46E-211 | -0.3141882 | 0.149 | 0.345 | 8E-207  | 7 | SH3BGRL  | Principal cells |
| 4.63E-137 | -0.2874416 | 0.153 | 0.306 | 1E-132  | 7 | NFKBIA   | Principal cells |
| 2.45E-282 | -0.3879891 | 0.157 | 0.392 | 5E-278  | 7 | CYBA     | Principal cells |
| 2.73E-134 | -0.3134048 | 0.157 | 0.308 | 6E-130  | 7 | S100A4   | Principal cells |

|           |            |       |       |         |   |         |                 |
|-----------|------------|-------|-------|---------|---|---------|-----------------|
| 1.95E-173 | -0.2507784 | 0.335 | 0.512 | 4E-169  | 7 | EEF1D   | Principal cells |
| 1.69E-221 | -2.1726748 | 0.015 | 0.189 | 4E-217  | 7 | IGKC    | Principal cells |
| 5.42E-149 | -0.2630804 | 0.305 | 0.464 | 1E-144  | 7 | HLA-A   | Principal cells |
| 1.84E-141 | -0.2627301 | 0.334 | 0.483 | 4E-137  | 7 | PFN1    | Principal cells |
| 6.638E-64 | -0.3398429 | 0.106 | 0.193 | 1.5E-59 | 7 | APOE    | Principal cells |
| 9.08E-154 | -0.2559803 | 0.456 | 0.597 | 2E-149  | 7 | RPS5    | Principal cells |
| 3.244E-31 | -0.2594282 | 0.181 | 0.239 | 7.2E-27 | 7 | MT1E    | Principal cells |
| 1.8E-196  | -0.2825759 | 0.464 | 0.621 | 4E-192  | 7 | UBA52   | Principal cells |
| 1.76E-126 | -0.3224213 | 0.262 | 0.399 | 4E-122  | 7 | IFITM3  | Principal cells |
| 3.4E-152  | -0.25083   | 0.603 | 0.707 | 8E-148  | 7 | RPL19   | Principal cells |
| 1.88E-236 | -0.3060565 | 0.446 | 0.624 | 4E-232  | 7 | RPS16   | Principal cells |
| 1.1E-198  | -0.2835703 | 0.567 | 0.705 | 2E-194  | 7 | RPS17   | Principal cells |
| 1.635E-16 | -0.2905052 | 0.13  | 0.165 | 3.6E-12 | 7 | MGP     | Principal cells |
| 0         | -0.4155402 | 0.297 | 0.535 | 0       | 7 | HLA-B   | Principal cells |
| 3.64E-181 | -0.2529674 | 0.769 | 0.843 | 8E-177  | 7 | RPL35   | Principal cells |
| 5.18E-156 | -0.3620015 | 0.282 | 0.435 | 1E-151  | 7 | CST3    | Principal cells |
| 8.7E-168  | -0.2691301 | 0.669 | 0.761 | 2E-163  | 7 | RPL35A  | Principal cells |
| 1.29E-155 | -0.2877116 | 0.551 | 0.66  | 3E-151  | 7 | RPS3    | Principal cells |
| 1.87E-196 | -0.2661575 | 0.826 | 0.892 | 4E-192  | 7 | RPS28   | Principal cells |
| 2.58E-178 | -0.2780184 | 0.693 | 0.777 | 6E-174  | 7 | RPL23A  | Principal cells |
| 2.48E-162 | -0.268009  | 0.749 | 0.803 | 5E-158  | 7 | RPL11   | Principal cells |
| 1.78E-145 | -0.2527804 | 0.98  | 0.979 | 4E-141  | 7 | RPL34   | Principal cells |
| 1.43E-227 | -0.3308083 | 0.543 | 0.701 | 3E-223  | 7 | RPS26   | Principal cells |
| 3.47E-171 | -0.2790613 | 0.749 | 0.813 | 8E-167  | 7 | RPL12   | Principal cells |
| 5.28E-238 | -0.5697675 | 0.173 | 0.378 | 1E-233  | 7 | LGALS1  | Principal cells |
| 3.068E-53 | -0.2634081 | 0.828 | 0.832 | 6.8E-49 | 7 | ACTB    | Principal cells |
| 2.87E-254 | -0.334151  | 0.572 | 0.717 | 6E-250  | 7 | RPS13   | Principal cells |
| 1.15E-198 | -0.2955166 | 0.777 | 0.84  | 3E-194  | 7 | RPL26   | Principal cells |
| 1.19E-282 | -0.3525837 | 0.586 | 0.744 | 3E-278  | 7 | RPL27A  | Principal cells |
| 1.12E-193 | -0.2924389 | 0.901 | 0.929 | 2E-189  | 7 | RPS29   | Principal cells |
| 0.0091701 | -0.3003035 | 0.158 | 0.163 | 1       | 7 | IGFBP5  | Principal cells |
| 6.186E-71 | -0.4719893 | 0.18  | 0.281 | 1.4E-66 | 7 | MT1X    | Principal cells |
| 1.2E-262  | -0.365598  | 0.632 | 0.762 | 3E-258  | 7 | RPS3A   | Principal cells |
| 3.71E-210 | -0.3270938 | 0.803 | 0.862 | 8E-206  | 7 | RPS8    | Principal cells |
| 3.55E-257 | -0.335194  | 0.785 | 0.861 | 8E-253  | 7 | RPS12   | Principal cells |
| 0         | -0.3416133 | 0.829 | 0.898 | 0       | 7 | RPS15   | Principal cells |
| 0         | -0.3750088 | 0.686 | 0.808 | 0       | 7 | TPT1    | Principal cells |
| 0         | -0.3829868 | 0.729 | 0.837 | 0       | 7 | RPLP2   | Principal cells |
| 0         | -0.4660997 | 0.511 | 0.711 | 0       | 7 | RPS2    | Principal cells |
| 0         | -0.6806703 | 0.233 | 0.473 | 0       | 7 | CD74    | Principal cells |
| 0         | -0.4102023 | 0.672 | 0.808 | 0       | 7 | RPL28   | Principal cells |
| 0         | -0.3703186 | 0.847 | 0.905 | 0       | 7 | RPL32   | Principal cells |
| 0         | -0.463495  | 0.583 | 0.761 | 0       | 7 | RPL18A  | Principal cells |
| 3.64E-291 | -0.3836208 | 0.873 | 0.926 | 8E-287  | 7 | RPS18   | Principal cells |
| 2.27E-255 | -0.374875  | 0.965 | 0.97  | 5E-251  | 7 | RPS27   | Principal cells |
| 0         | -0.4030851 | 0.848 | 0.916 | 0       | 7 | RPL13A  | Principal cells |
| 1.54E-287 | -0.8756251 | 0.166 | 0.387 | 3E-283  | 7 | HLA-DRA | Principal cells |
| 0         | -0.3924249 | 0.914 | 0.95  | 0       | 7 | RPL21   | Principal cells |

|           |            |       |       |         |   |         |                 |
|-----------|------------|-------|-------|---------|---|---------|-----------------|
| 0         | -0.4622089 | 0.701 | 0.83  | 0       | 7 | RPS15A  | Principal cells |
| 0         | -0.441076  | 0.856 | 0.923 | 0       | 7 | RPL13   | Principal cells |
| 0         | -0.4696281 | 0.839 | 0.926 | 0       | 7 | RPLP1   | Principal cells |
| 2.56E-210 | -0.6813554 | 0.341 | 0.521 | 6E-206  | 7 | MT2A    | Principal cells |
| 0         | -0.4942018 | 0.811 | 0.898 | 0       | 7 | RPS19   | Principal cells |
| 5.09E-276 | -0.5099144 | 0.711 | 0.806 | 1E-271  | 7 | FTH1    | Principal cells |
| 0         | -0.4857822 | 0.853 | 0.917 | 0       | 7 | RPL10   | Principal cells |
| 0         | -0.4860502 | 0.911 | 0.943 | 0       | 7 | RPL39   | Principal cells |
| 1.33E-130 | -0.4720087 | 0.943 | 0.884 | 3E-126  | 7 | TMSB4X  | Principal cells |
| 0         | -0.6506658 | 0.74  | 0.865 | 0       | 7 | TMSB10  | Principal cells |
| 1.753E-26 | -0.7357945 | 0.193 | 0.243 | 3.9E-22 | 7 | MT1G    | Principal cells |
| 7.198E-17 | -0.7633179 | 0.366 | 0.381 | 1.6E-12 | 7 | SPP1    | Principal cells |
| 0         | -1.0392892 | 0.62  | 0.796 | 0       | 7 | FTL     | Principal cells |
| 0         | -1.1134063 | 0.879 | 0.954 | 0       | 7 | B2M     | Principal cells |
| 0         | 1.37335086 | 0.539 | 0.041 | 0       | 8 | SOD3    | Early DCT/TAL   |
| 0         | 2.05346316 | 0.905 | 0.142 | 0       | 8 | S100A2  | Early DCT/TAL   |
| 0         | 0.47858282 | 0.411 | 0.027 | 0       | 8 | PAPPA2  | Early DCT/TAL   |
| 0         | 0.31330646 | 0.275 | 0.012 | 0       | 8 | CA4     | Early DCT/TAL   |
| 0         | 0.60872918 | 0.419 | 0.051 | 0       | 8 | IGFBP6  | Early DCT/TAL   |
| 0         | 0.57013193 | 0.574 | 0.079 | 0       | 8 | SLC12A1 | Early DCT/TAL   |
| 0         | 1.19997384 | 0.897 | 0.266 | 0       | 8 | WFDC2   | Early DCT/TAL   |
| 0         | 0.77512037 | 0.626 | 0.121 | 0       | 8 | PCSK1N  | Early DCT/TAL   |
| 0         | 0.45981004 | 0.43  | 0.051 | 0       | 8 | CLDN10  | Early DCT/TAL   |
| 0         | 0.38176584 | 0.369 | 0.04  | 0       | 8 | BBOX1   | Early DCT/TAL   |
| 0         | 0.30395997 | 0.276 | 0.027 | 0       | 8 | SUCNR1  | Early DCT/TAL   |
| 0         | 0.45633103 | 0.469 | 0.082 | 0       | 8 | ACSL4   | Early DCT/TAL   |
| 0         | 0.47378336 | 0.44  | 0.081 | 0       | 8 | ITM2C   | Early DCT/TAL   |
| 0         | 0.32024749 | 0.296 | 0.038 | 0       | 8 | TSPAN8  | Early DCT/TAL   |
| 0         | 0.77121427 | 0.854 | 0.279 | 0       | 8 | DEFB1   | Early DCT/TAL   |
| 0         | 0.85120165 | 0.819 | 0.3   | 0       | 8 | FXD2    | Early DCT/TAL   |
| 0         | 0.40710896 | 0.4   | 0.071 | 0       | 8 | ITGB6   | Early DCT/TAL   |
| 0         | 0.53214827 | 0.608 | 0.152 | 0       | 8 | MUC1    | Early DCT/TAL   |
| 0         | 0.78320921 | 0.733 | 0.282 | 0       | 8 | ADIRF   | Early DCT/TAL   |
| 0         | 0.40799289 | 0.479 | 0.116 | 0       | 8 | CAMK2N1 | Early DCT/TAL   |
| 0         | 0.32754906 | 0.4   | 0.084 | 0       | 8 | TFCP2L1 | Early DCT/TAL   |
| 0         | 0.38035921 | 0.474 | 0.118 | 0       | 8 | MAL     | Early DCT/TAL   |
| 0         | 0.51795224 | 0.518 | 0.176 | 0       | 8 | CRIP1   | Early DCT/TAL   |
| 0         | 0.25154802 | 0.288 | 0.049 | 0       | 8 | MGLL    | Early DCT/TAL   |
| 0         | 1.04642565 | 0.974 | 0.694 | 0       | 8 | S100A6  | Early DCT/TAL   |
| 0         | 0.29065228 | 0.35  | 0.07  | 0       | 8 | EFHD1   | Early DCT/TAL   |
| 0         | 0.5170254  | 0.675 | 0.241 | 0       | 8 | ATP1A1  | Early DCT/TAL   |
| 0         | 0.38694848 | 0.515 | 0.138 | 0       | 8 | KCNJ16  | Early DCT/TAL   |
| 0         | 0.5881155  | 0.768 | 0.363 | 0       | 8 | SPP1    | Early DCT/TAL   |
| 0         | 0.32829163 | 0.427 | 0.114 | 0       | 8 | CA12    | Early DCT/TAL   |
| 0         | 0.27517751 | 0.321 | 0.075 | 0       | 8 | KRT7    | Early DCT/TAL   |
| 0         | 0.41646115 | 0.545 | 0.199 | 0       | 8 | S100A13 | Early DCT/TAL   |
| 0         | 0.49102313 | 0.803 | 0.362 | 0       | 8 | ATP1B1  | Early DCT/TAL   |
| 0         | 0.46447777 | 0.675 | 0.288 | 0       | 8 | CD9     | Early DCT/TAL   |

|           |            |       |       |         |   |          |               |
|-----------|------------|-------|-------|---------|---|----------|---------------|
| 0         | 0.26666205 | 0.338 | 0.089 | 0       | 8 | C8orf4   | Early DCT/TAL |
| 0         | 0.29871477 | 0.405 | 0.133 | 0       | 8 | SDC4     | Early DCT/TAL |
| 0         | 0.26080459 | 0.334 | 0.106 | 0       | 8 | FGL2     | Early DCT/TAL |
| 0         | 0.36794363 | 0.726 | 0.326 | 0       | 8 | CD24     | Early DCT/TAL |
| 0         | 0.42966812 | 0.775 | 0.407 | 0       | 8 | DSTN     | Early DCT/TAL |
| 0         | 0.42700992 | 0.606 | 0.318 | 0       | 8 | ATP6V0E1 | Early DCT/TAL |
| 0         | 0.41620025 | 0.739 | 0.423 | 0       | 8 | HSPB1    | Early DCT/TAL |
| 0         | 0.39266781 | 0.689 | 0.373 | 0       | 8 | PPDPF    | Early DCT/TAL |
| 0         | 0.2694284  | 0.422 | 0.165 | 0       | 8 | EZR      | Early DCT/TAL |
| 0         | 0.31491966 | 0.639 | 0.317 | 0       | 8 | CTSD     | Early DCT/TAL |
| 0         | 0.36380116 | 0.722 | 0.439 | 0       | 8 | S100A11  | Early DCT/TAL |
| 0         | 0.26489793 | 0.434 | 0.194 | 0       | 8 | MGST3    | Early DCT/TAL |
| 0         | 0.33322494 | 0.644 | 0.365 | 0       | 8 | S100A10  | Early DCT/TAL |
| 0         | 0.27722379 | 0.515 | 0.246 | 0       | 8 | PEBP1    | Early DCT/TAL |
| 0         | 0.31930373 | 0.647 | 0.367 | 0       | 8 | GSTP1    | Early DCT/TAL |
| 3.9E-292  | 0.27532773 | 0.446 | 0.226 | 9E-288  | 8 | HIST1H4C | Early DCT/TAL |
| 3.26E-296 | 0.27312669 | 0.676 | 0.416 | 7E-292  | 8 | CST3     | Early DCT/TAL |
| 2.36E-286 | 0.27822633 | 0.852 | 0.654 | 5E-282  | 8 | ITM2B    | Early DCT/TAL |
| 2.69E-101 | -0.2557097 | 0.008 | 0.103 | 5.9E-97 | 8 | C1QB     | Early DCT/TAL |
| 5.41E-169 | -0.3142463 | 0.015 | 0.166 | 1E-164  | 8 | FCER1G   | Early DCT/TAL |
| 3E-122    | -0.340335  | 0.011 | 0.126 | 7E-118  | 8 | CCL3     | Early DCT/TAL |
| 3.16E-116 | -0.3373941 | 0.012 | 0.121 | 7E-112  | 8 | C1QA     | Early DCT/TAL |
| 9.1E-185  | -0.3393139 | 0.02  | 0.186 | 2E-180  | 8 | RGS1     | Early DCT/TAL |
| 2.14E-124 | -0.3190117 | 0.018 | 0.138 | 5E-120  | 8 | CCL4     | Early DCT/TAL |
| 7.49E-157 | -0.4649722 | 0.017 | 0.161 | 2E-152  | 8 | LYZ      | Early DCT/TAL |
| 3.42E-136 | -0.3000348 | 0.027 | 0.161 | 8E-132  | 8 | CCL5     | Early DCT/TAL |
| 1.57E-193 | -0.3809449 | 0.028 | 0.203 | 3E-189  | 8 | AIF1     | Early DCT/TAL |
| 2.7E-152  | -0.260158  | 0.038 | 0.188 | 6E-148  | 8 | CD52     | Early DCT/TAL |
| 7.57E-189 | -0.3772986 | 0.03  | 0.203 | 2E-184  | 8 | TYROBP   | Early DCT/TAL |
| 0         | -0.563205  | 0.034 | 0.343 | 0       | 8 | SRGN     | Early DCT/TAL |
| 3.56E-185 | -0.3104522 | 0.042 | 0.217 | 8E-181  | 8 | HLA-DPA1 | Early DCT/TAL |
| 1.84E-170 | -0.2895929 | 0.059 | 0.23  | 4E-166  | 8 | HLA-DRB1 | Early DCT/TAL |
| 8.42E-124 | -0.2667786 | 0.053 | 0.186 | 2E-119  | 8 | SPARC    | Early DCT/TAL |
| 1.37E-116 | -0.2593026 | 0.054 | 0.183 | 3E-112  | 8 | IFI27    | Early DCT/TAL |
| 5.36E-207 | -0.332807  | 0.059 | 0.255 | 1E-202  | 8 | CXCR4    | Early DCT/TAL |
| 1.29E-205 | -0.3793372 | 0.051 | 0.243 | 3E-201  | 8 | HLA-DPB1 | Early DCT/TAL |
| 3.407E-95 | -0.3154986 | 0.037 | 0.141 | 7.5E-91 | 8 | SPARCL1  | Early DCT/TAL |
| 3.963E-88 | -0.3200324 | 0.042 | 0.143 | 8.8E-84 | 8 | CTGF     | Early DCT/TAL |
| 5.56E-175 | -0.3088231 | 0.085 | 0.264 | 1E-170  | 8 | IL32     | Early DCT/TAL |
| 0         | -0.4937604 | 0.093 | 0.379 | 0       | 8 | VIM      | Early DCT/TAL |
| 1.074E-93 | -0.3649426 | 0.057 | 0.168 | 2.4E-89 | 8 | MGP      | Early DCT/TAL |
| 5.865E-52 | -0.2557702 | 0.073 | 0.15  | 1.3E-47 | 8 | CXCL2    | Early DCT/TAL |
| 1.21E-123 | -0.2895172 | 0.154 | 0.305 | 3E-119  | 8 | NFKBIA   | Early DCT/TAL |
| 1.32E-109 | -0.2731822 | 0.242 | 0.387 | 3E-105  | 8 | ZFP36    | Early DCT/TAL |
| 1.02E-196 | -2.1681904 | 0.016 | 0.188 | 2E-192  | 8 | IGKC     | Early DCT/TAL |
| 1.977E-55 | -0.3312621 | 0.108 | 0.193 | 4.4E-51 | 8 | APOE     | Early DCT/TAL |
| 4.27E-168 | -0.3281046 | 0.292 | 0.473 | 9E-164  | 8 | PABPC1   | Early DCT/TAL |
| 7.48E-129 | -0.2779368 | 0.386 | 0.529 | 2E-124  | 8 | HLA-B    | Early DCT/TAL |

|           |            |       |       |         |   |          |                                       |
|-----------|------------|-------|-------|---------|---|----------|---------------------------------------|
| 8.2E-105  | -0.2504391 | 0.572 | 0.658 | 2E-100  | 8 | RPS3     | Early DCT/TAL                         |
| 6.537E-18 | -0.3033703 | 0.121 | 0.165 | 1.4E-13 | 8 | IGFBP5   | Early DCT/TAL                         |
| 0         | -0.9237891 | 0.095 | 0.389 | 0       | 8 | HLA-DRA  | Early DCT/TAL                         |
| 5.24E-118 | -0.2748486 | 0.537 | 0.641 | 1E-113  | 8 | H3F3B    | Early DCT/TAL                         |
| 8.66E-179 | -0.2985382 | 0.602 | 0.715 | 2E-174  | 8 | RPS13    | Early DCT/TAL                         |
| 1.54E-129 | -0.2714044 | 0.763 | 0.803 | 3E-125  | 8 | RPL28    | Early DCT/TAL                         |
| 4.86E-184 | -0.2777299 | 0.852 | 0.897 | 1E-179  | 8 | RPS15    | Early DCT/TAL                         |
| 2.21E-184 | -0.2749141 | 0.888 | 0.92  | 5E-180  | 8 | RPS27A   | Early DCT/TAL                         |
| 1.85E-111 | -0.2712725 | 0.915 | 0.924 | 4E-107  | 8 | RPS18    | Early DCT/TAL                         |
| 1.21E-159 | -0.2745537 | 0.904 | 0.923 | 3E-155  | 8 | RPLP1    | Early DCT/TAL                         |
| 7.12E-146 | -0.3141042 | 0.617 | 0.705 | 2E-141  | 8 | RPS2     | Early DCT/TAL                         |
| 4.25E-170 | -0.4084972 | 0.355 | 0.526 | 9E-166  | 8 | DUSP1    | Early DCT/TAL                         |
| 1.32E-163 | -0.3023171 | 0.81  | 0.861 | 3E-159  | 8 | RPS8     | Early DCT/TAL                         |
| 4.12E-156 | -0.5144991 | 0.208 | 0.375 | 9E-152  | 8 | LGALS1   | Early DCT/TAL                         |
| 3.28E-183 | -0.2997849 | 0.87  | 0.904 | 7E-179  | 8 | RPL32    | Early DCT/TAL                         |
| 4.65E-210 | -0.3252746 | 0.764 | 0.835 | 1E-205  | 8 | RPLP2    | Early DCT/TAL                         |
| 0         | -0.6840712 | 0.21  | 0.473 | 0       | 8 | CD74     | Early DCT/TAL                         |
| 3.23E-209 | -0.3166531 | 0.879 | 0.915 | 7E-205  | 8 | RPL13A   | Early DCT/TAL                         |
| 4.9E-213  | -0.3509034 | 0.659 | 0.76  | 1E-208  | 8 | RPS3A    | Early DCT/TAL                         |
| 6.58E-168 | -0.3205435 | 0.887 | 0.915 | 1E-163  | 8 | RPL10    | Early DCT/TAL                         |
| 5.51E-110 | -0.3738062 | 0.58  | 0.688 | 1E-105  | 8 | FOS      | Early DCT/TAL                         |
| 1.186E-08 | -0.3456321 | 0.257 | 0.277 | 0.00026 | 8 | MT1X     | Early DCT/TAL                         |
| 2.09E-287 | -0.4042518 | 0.62  | 0.759 | 5E-283  | 8 | RPL18A   | Early DCT/TAL                         |
| 2.87E-264 | -0.350893  | 0.877 | 0.922 | 6E-260  | 8 | RPL13    | Early DCT/TAL                         |
| 2E-109    | -0.3557104 | 0.809 | 0.833 | 4E-105  | 8 | ACTB     | Early DCT/TAL                         |
| 9.66E-283 | -0.3983652 | 0.725 | 0.828 | 2E-278  | 8 | RPS15A   | Early DCT/TAL                         |
| 0         | -0.4415993 | 0.656 | 0.809 | 0       | 8 | TPT1     | Early DCT/TAL                         |
| 1.43E-225 | -0.3635247 | 0.958 | 0.971 | 3E-221  | 8 | RPS27    | Early DCT/TAL                         |
| 0         | -0.3738109 | 0.963 | 0.98  | 0       | 8 | RPL34    | Early DCT/TAL                         |
| 0         | -0.4096912 | 0.894 | 0.95  | 0       | 8 | RPL21    | Early DCT/TAL                         |
| 2.68E-305 | -0.4162383 | 0.842 | 0.897 | 6E-301  | 8 | RPS19    | Early DCT/TAL                         |
| 3.53E-240 | -0.4469847 | 0.81  | 0.861 | 8E-236  | 8 | TMSB10   | Early DCT/TAL                         |
| 0         | -0.599799  | 0.875 | 0.944 | 0       | 8 | RPL39    | Early DCT/TAL                         |
| 7.957E-45 | -0.4890254 | 0.349 | 0.236 | 1.8E-40 | 8 | MT1G     | Early DCT/TAL                         |
| 1.88E-134 | -0.8268646 | 0.738 | 0.79  | 4E-130  | 8 | FTL      | Early DCT/TAL                         |
| 0         | -1.1651749 | 0.677 | 0.896 | 0       | 8 | TMSB4X   | Early DCT/TAL                         |
| 0         | -1.0100772 | 0.899 | 0.952 | 0       | 8 | B2M      | Early DCT/TAL                         |
| 0         | 0.46123657 | 0.354 | 0.004 | 0       | 9 | FCER1A   | Immune-Dendritic/Macrophage/Monocytes |
| 0         | 0.70120928 | 0.621 | 0.073 | 0       | 9 | HLA-DQB1 | Immune-Dendritic/Macrophage/Monocytes |
| 0         | 0.25454803 | 0.255 | 0.011 | 0       | 9 | CSF2RA   | Immune-Dendritic/Macrophage/Monocytes |
| 0         | 1.30742177 | 0.923 | 0.206 | 0       | 9 | HLA-DPB1 | Immune-Dendritic/Macrophage/Monocytes |
| 0         | 1.10454096 | 0.871 | 0.182 | 0       | 9 | HLA-DPA1 | Immune-Dendritic/Macrophage/Monocytes |
| 0         | 0.54905163 | 0.487 | 0.052 | 0       | 9 | HLA-DQA1 | Immune-Dendritic/Macrophage/Monocytes |
| 0         | 1.14213548 | 0.859 | 0.196 | 0       | 9 | HLA-DRB1 | Immune-Dendritic/Macrophage/Monocytes |
| 0         | 0.6131205  | 0.593 | 0.087 | 0       | 9 | HLA-DQA1 | Immune-Dendritic/Macrophage/Monocytes |
| 0         | 1.40900688 | 0.991 | 0.35  | 0       | 9 | HLA-DRA  | Immune-Dendritic/Macrophage/Monocytes |
| 0         | 0.83668634 | 0.686 | 0.154 | 0       | 9 | HLA-DRB5 | Immune-Dendritic/Macrophage/Monocytes |
| 0         | 0.84413882 | 0.649 | 0.159 | 0       | 9 | RGS1     | Immune-Dendritic/Macrophage/Monocytes |

|           |            |       |       |         |   |          |                                       |
|-----------|------------|-------|-------|---------|---|----------|---------------------------------------|
| 0         | 1.30712734 | 0.982 | 0.439 | 0       | 9 | CD74     | Immune-Dendritic/Macrophage/Monocytes |
| 0         | 0.67005262 | 0.746 | 0.172 | 0       | 9 | TYROBP   | Immune-Dendritic/Macrophage/Monocytes |
| 0         | 0.66791534 | 0.362 | 0.085 | 0       | 9 | AREG     | Immune-Dendritic/Macrophage/Monocytes |
| 0         | 0.62077407 | 0.571 | 0.137 | 0       | 9 | LYZ      | Immune-Dendritic/Macrophage/Monocytes |
| 0         | 0.32368318 | 0.337 | 0.048 | 0       | 9 | RNASE6   | Immune-Dendritic/Macrophage/Monocytes |
| 0         | 0.40872435 | 0.249 | 0.049 | 0       | 9 | CCL3L3   | Immune-Dendritic/Macrophage/Monocytes |
| 0         | 0.59553383 | 0.371 | 0.11  | 0       | 9 | CCL3     | Immune-Dendritic/Macrophage/Monocytes |
| 0         | 0.74663193 | 0.789 | 0.299 | 0       | 9 | GPX1     | Immune-Dendritic/Macrophage/Monocytes |
| 0         | 0.40068726 | 0.399 | 0.085 | 0       | 9 | RP11-114 | Immune-Dendritic/Macrophage/Monocytes |
| 0         | 0.4969875  | 0.665 | 0.176 | 0       | 9 | AIF1     | Immune-Dendritic/Macrophage/Monocytes |
| 0         | 0.25215176 | 0.27  | 0.037 | 0       | 9 | IGSF6    | Immune-Dendritic/Macrophage/Monocytes |
| 0         | 0.25215176 | 0.27  | 0.037 | 0       | 9 | IGSF6    | Immune-Dendritic/Macrophage/Monocytes |
| 0         | 0.85602863 | 0.846 | 0.41  | 0       | 9 | CST3     | Immune-Dendritic/Macrophage/Monocytes |
| 0         | 0.38420591 | 0.453 | 0.103 | 0       | 9 | HLA-DMA  | Immune-Dendritic/Macrophage/Monocytes |
| 0         | 0.35598606 | 0.42  | 0.091 | 0       | 9 | MS4A6A   | Immune-Dendritic/Macrophage/Monocytes |
| 0         | 0.33872111 | 0.425 | 0.091 | 0       | 9 | LST1     | Immune-Dendritic/Macrophage/Monocytes |
| 0         | 0.29470974 | 0.333 | 0.066 | 0       | 9 | MNDA     | Immune-Dendritic/Macrophage/Monocytes |
| 0         | 0.48177739 | 0.53  | 0.176 | 0       | 9 | SGK1     | Immune-Dendritic/Macrophage/Monocytes |
| 0         | 0.48048275 | 0.653 | 0.229 | 0       | 9 | CXCR4    | Immune-Dendritic/Macrophage/Monocytes |
| 0         | 0.27334792 | 0.312 | 0.064 | 0       | 9 | C1orf162 | Immune-Dendritic/Macrophage/Monocytes |
| 0         | 0.33535226 | 0.512 | 0.144 | 0       | 9 | FCER1G   | Immune-Dendritic/Macrophage/Monocytes |
| 1.14E-291 | 0.32738558 | 0.193 | 0.057 | 3E-287  | 9 | CCL4L2   | Immune-Dendritic/Macrophage/Monocytes |
| 0         | 0.33860475 | 0.382 | 0.122 | 0       | 9 | RGS2     | Immune-Dendritic/Macrophage/Monocytes |
| 0         | 0.39341844 | 0.686 | 0.314 | 0       | 9 | SRGN     | Immune-Dendritic/Macrophage/Monocytes |
| 0         | 0.25433796 | 0.346 | 0.106 | 0       | 9 | CELF2    | Immune-Dendritic/Macrophage/Monocytes |
| 1.568E-93 | 0.37181611 | 0.188 | 0.095 | 3.5E-89 | 9 | MT1H     | Immune-Dendritic/Macrophage/Monocytes |
| 0         | 0.49288612 | 0.933 | 0.744 | 0       | 9 | RPS24    | Immune-Dendritic/Macrophage/Monocytes |
| 0         | 0.35984434 | 0.749 | 0.453 | 0       | 9 | PABPC1   | Immune-Dendritic/Macrophage/Monocytes |
| 0         | 0.51463121 | 0.974 | 0.854 | 0       | 9 | RPS8     | Immune-Dendritic/Macrophage/Monocytes |
| 2.97E-296 | 0.26729157 | 0.401 | 0.187 | 7E-292  | 9 | HERPUD1  | Immune-Dendritic/Macrophage/Monocytes |
| 0         | 0.46168454 | 0.965 | 0.831 | 0       | 9 | RPL26    | Immune-Dendritic/Macrophage/Monocytes |
| 0         | 0.38932612 | 0.844 | 0.622 | 0       | 9 | RPL37    | Immune-Dendritic/Macrophage/Monocytes |
| 0         | 0.49023027 | 0.986 | 0.925 | 0       | 9 | RPS29    | Immune-Dendritic/Macrophage/Monocytes |
| 8.368E-62 | 0.34462605 | 0.28  | 0.185 | 1.8E-57 | 9 | APOE     | Immune-Dendritic/Macrophage/Monocytes |
| 0         | 0.35384949 | 0.775 | 0.526 | 0       | 9 | RPL30    | Immune-Dendritic/Macrophage/Monocytes |
| 0         | 0.4345756  | 0.942 | 0.794 | 0       | 9 | RPL11    | Immune-Dendritic/Macrophage/Monocytes |
| 0         | 0.39013483 | 0.9   | 0.693 | 0       | 9 | RPS2     | Immune-Dendritic/Macrophage/Monocytes |
| 0         | 0.44726566 | 0.998 | 0.882 | 0       | 9 | TMSB4X   | Immune-Dendritic/Macrophage/Monocytes |
| 0         | 0.43624256 | 0.988 | 0.854 | 0       | 9 | TMSB10   | Immune-Dendritic/Macrophage/Monocytes |
| 0         | 0.4185513  | 0.96  | 0.818 | 0       | 9 | RPS15A   | Immune-Dendritic/Macrophage/Monocytes |
| 0         | 0.37898158 | 0.889 | 0.694 | 0       | 9 | RPL19    | Immune-Dendritic/Macrophage/Monocytes |
| 0         | 0.41830281 | 0.953 | 0.824 | 0       | 9 | RPS23    | Immune-Dendritic/Macrophage/Monocytes |
| 0         | 0.39733012 | 0.919 | 0.766 | 0       | 9 | RPL23A   | Immune-Dendritic/Macrophage/Monocytes |
| 0         | 0.43832375 | 0.987 | 0.911 | 0       | 9 | RPL10    | Immune-Dendritic/Macrophage/Monocytes |
| 2.08E-305 | 0.33905344 | 0.773 | 0.567 | 5E-301  | 9 | RPS11    | Immune-Dendritic/Macrophage/Monocytes |
| 0         | 0.38676649 | 0.95  | 0.795 | 0       | 9 | FTH1     | Immune-Dendritic/Macrophage/Monocytes |
| 0         | 0.33523993 | 0.814 | 0.605 | 0       | 9 | UBA52    | Immune-Dendritic/Macrophage/Monocytes |
| 0         | 0.40277174 | 0.987 | 0.89  | 0       | 9 | RPS19    | Immune-Dendritic/Macrophage/Monocytes |

|           |            |       |       |         |   |         |                                       |
|-----------|------------|-------|-------|---------|---|---------|---------------------------------------|
| 6.37E-283 | 0.30790497 | 0.735 | 0.508 | 1E-278  | 9 | RPL23   | Immune-Dendritic/Macrophage/Monocytes |
| 0         | 0.3785628  | 0.945 | 0.804 | 0       | 9 | RPL12   | Immune-Dendritic/Macrophage/Monocytes |
| 0         | 0.43236653 | 0.997 | 0.969 | 0       | 9 | RPS27   | Immune-Dendritic/Macrophage/Monocytes |
| 0         | 0.36156207 | 0.921 | 0.749 | 0       | 9 | RPS3A   | Immune-Dendritic/Macrophage/Monocytes |
| 0         | 0.36238235 | 0.908 | 0.75  | 0       | 9 | RPL35A  | Immune-Dendritic/Macrophage/Monocytes |
| 0         | 0.35283028 | 0.924 | 0.745 | 0       | 9 | RPL18A  | Immune-Dendritic/Macrophage/Monocytes |
| 0         | 0.34007715 | 0.853 | 0.665 | 0       | 9 | RPL31   | Immune-Dendritic/Macrophage/Monocytes |
| 7.14E-242 | 0.26207472 | 0.591 | 0.363 | 2E-237  | 9 | RPL36A  | Immune-Dendritic/Macrophage/Monocytes |
| 1.51E-267 | 0.30608339 | 0.751 | 0.54  | 3E-263  | 9 | RPL27   | Immune-Dendritic/Macrophage/Monocytes |
| 0         | 0.34657573 | 0.894 | 0.729 | 0       | 9 | RPL27A  | Immune-Dendritic/Macrophage/Monocytes |
| 0         | 0.37939194 | 0.982 | 0.899 | 0       | 9 | RPL32   | Immune-Dendritic/Macrophage/Monocytes |
| 0         | 0.33267806 | 0.859 | 0.691 | 0       | 9 | RPS17   | Immune-Dendritic/Macrophage/Monocytes |
| 0         | 0.38995394 | 0.994 | 0.946 | 0       | 9 | RPL21   | Immune-Dendritic/Macrophage/Monocytes |
| 2.08E-305 | 0.32087879 | 0.872 | 0.703 | 5E-301  | 9 | RPS13   | Immune-Dendritic/Macrophage/Monocytes |
| 0         | 0.36252005 | 0.974 | 0.892 | 0       | 9 | RPS15   | Immune-Dendritic/Macrophage/Monocytes |
| 0         | 0.36605324 | 0.986 | 0.921 | 0       | 9 | RPS18   | Immune-Dendritic/Macrophage/Monocytes |
| 0         | 0.33225463 | 0.933 | 0.796 | 0       | 9 | RPL28   | Immune-Dendritic/Macrophage/Monocytes |
| 4.214E-13 | 0.37046423 | 0.536 | 0.511 | 9.3E-09 | 9 | MT2A    | Immune-Dendritic/Macrophage/Monocytes |
| 4.665E-46 | 0.29067436 | 0.362 | 0.272 | 1E-41   | 9 | MT1X    | Immune-Dendritic/Macrophage/Monocytes |
| 0         | 0.34705909 | 0.963 | 0.877 | 0       | 9 | RPS14   | Immune-Dendritic/Macrophage/Monocytes |
| 4.97E-200 | 0.26635114 | 0.678 | 0.485 | 1E-195  | 9 | RPL5    | Immune-Dendritic/Macrophage/Monocytes |
| 2.52E-232 | 0.2807509  | 0.792 | 0.608 | 6E-228  | 9 | RPS16   | Immune-Dendritic/Macrophage/Monocytes |
| 1.15E-215 | 0.26870349 | 0.747 | 0.549 | 3E-211  | 9 | RPL29   | Immune-Dendritic/Macrophage/Monocytes |
| 0         | 0.34448183 | 0.993 | 0.939 | 0       | 9 | RPL39   | Immune-Dendritic/Macrophage/Monocytes |
| 3.21E-225 | 0.2816911  | 0.79  | 0.611 | 7E-221  | 9 | RPL38   | Immune-Dendritic/Macrophage/Monocytes |
| 0         | 0.31418272 | 0.951 | 0.827 | 0       | 9 | RPLP2   | Immune-Dendritic/Macrophage/Monocytes |
| 0         | 0.31459428 | 0.948 | 0.834 | 0       | 9 | RPL35   | Immune-Dendritic/Macrophage/Monocytes |
| 0         | 0.30570684 | 0.921 | 0.791 | 0       | 9 | RPS25   | Immune-Dendritic/Macrophage/Monocytes |
| 2.36E-195 | 0.26430239 | 0.733 | 0.547 | 5E-191  | 9 | RPS7    | Immune-Dendritic/Macrophage/Monocytes |
| 3.83E-222 | 0.27427831 | 0.802 | 0.634 | 8E-218  | 9 | RPS20   | Immune-Dendritic/Macrophage/Monocytes |
| 2.61E-233 | 0.27810858 | 0.832 | 0.673 | 6E-229  | 9 | FAU     | Immune-Dendritic/Macrophage/Monocytes |
| 0         | 0.31181429 | 0.987 | 0.917 | 0       | 9 | RPL13   | Immune-Dendritic/Macrophage/Monocytes |
| 1.03E-215 | 0.26168242 | 0.828 | 0.647 | 2E-211  | 9 | RPS3    | Immune-Dendritic/Macrophage/Monocytes |
| 0         | 0.32490183 | 0.997 | 0.978 | 0       | 9 | RPL34   | Immune-Dendritic/Macrophage/Monocytes |
| 4.51E-196 | 0.26469382 | 0.812 | 0.652 | 1E-191  | 9 | RPL6    | Immune-Dendritic/Macrophage/Monocytes |
| 1.58E-301 | 0.29141442 | 0.954 | 0.853 | 3E-297  | 9 | RPS12   | Immune-Dendritic/Macrophage/Monocytes |
| 9.74E-291 | 0.28870118 | 0.95  | 0.846 | 2E-286  | 9 | RPS6    | Immune-Dendritic/Macrophage/Monocytes |
| 1.19E-163 | 0.25120052 | 0.847 | 0.676 | 3E-159  | 9 | FOS     | Immune-Dendritic/Macrophage/Monocytes |
| 7.41E-191 | 0.25903171 | 0.854 | 0.709 | 2E-186  | 9 | RPS4X   | Immune-Dendritic/Macrophage/Monocytes |
| 7.43E-265 | 0.27421692 | 0.945 | 0.853 | 2E-260  | 9 | RPL36   | Immune-Dendritic/Macrophage/Monocytes |
| 1.42E-294 | 0.27009066 | 0.973 | 0.911 | 3E-290  | 9 | RPL13A  | Immune-Dendritic/Macrophage/Monocytes |
| 4.9E-262  | 0.25529832 | 0.98  | 0.919 | 1E-257  | 9 | RPLP1   | Immune-Dendritic/Macrophage/Monocytes |
| 1.11E-138 | -0.2821309 | 0.039 | 0.187 | 2E-134  | 9 | SPARC   | Immune-Dendritic/Macrophage/Monocytes |
| 6.65E-236 | -0.2703321 | 0.065 | 0.295 | 1E-231  | 9 | NGFRAP1 | Immune-Dendritic/Macrophage/Monocytes |
| 1.86E-100 | -0.3170182 | 0.029 | 0.141 | 4.1E-96 | 9 | SPARCL1 | Immune-Dendritic/Macrophage/Monocytes |
| 5.24E-104 | -0.3340939 | 0.028 | 0.143 | 1E-99   | 9 | CTGF    | Immune-Dendritic/Macrophage/Monocytes |
| 8.44E-111 | -0.2568146 | 0.052 | 0.182 | 2E-106  | 9 | IFI27   | Immune-Dendritic/Macrophage/Monocytes |
| 2.98E-123 | -0.4013439 | 0.035 | 0.169 | 7E-119  | 9 | MGP     | Immune-Dendritic/Macrophage/Monocytes |

|           |            |       |       |         |    |          |                                       |
|-----------|------------|-------|-------|---------|----|----------|---------------------------------------|
| 4.73E-148 | -0.5366634 | 0.03  | 0.181 | 1E-143  | 9  | S100A2   | Immune-Dendritic/Macrophage/Monocytes |
| 1.076E-87 | -0.3028267 | 0.053 | 0.163 | 2.4E-83 | 9  | MMP7     | Immune-Dendritic/Macrophage/Monocytes |
| 1.99E-145 | -0.3201221 | 0.082 | 0.252 | 4E-141  | 9  | HES1     | Immune-Dendritic/Macrophage/Monocytes |
| 9.37E-139 | -0.365615  | 0.065 | 0.222 | 2E-134  | 9  | CRYAB    | Immune-Dendritic/Macrophage/Monocytes |
| 5.51E-296 | -0.4550451 | 0.088 | 0.354 | 1E-291  | 9  | CD24     | Immune-Dendritic/Macrophage/Monocytes |
| 4.576E-58 | -0.2683711 | 0.079 | 0.167 | 1E-53   | 9  | CXCL14   | Immune-Dendritic/Macrophage/Monocytes |
| 1.49E-120 | -0.2634696 | 0.172 | 0.338 | 3E-116  | 9  | CTSD     | Immune-Dendritic/Macrophage/Monocytes |
| 3.63E-213 | -0.5104132 | 0.083 | 0.301 | 8E-209  | 9  | CLU      | Immune-Dendritic/Macrophage/Monocytes |
| 4.52E-289 | -0.4069613 | 0.168 | 0.434 | 1E-284  | 9  | DSTN     | Immune-Dendritic/Macrophage/Monocytes |
| 5.15E-259 | -0.7619827 | 0.064 | 0.303 | 1E-254  | 9  | WFDC2    | Immune-Dendritic/Macrophage/Monocytes |
| 1.8E-259  | -0.7249791 | 0.073 | 0.314 | 4E-255  | 9  | DEFB1    | Immune-Dendritic/Macrophage/Monocytes |
| 9.514E-65 | -0.3997255 | 0.072 | 0.167 | 2.1E-60 | 9  | IGFBP5   | Immune-Dendritic/Macrophage/Monocytes |
| 1.043E-98 | -0.2838461 | 0.256 | 0.398 | 2.3E-94 | 9  | IFITM3   | Immune-Dendritic/Macrophage/Monocytes |
| 2.8E-119  | -0.2508191 | 0.398 | 0.539 | 6E-115  | 9  | NDUFA4   | Immune-Dendritic/Macrophage/Monocytes |
| 0         | -0.8017553 | 0.116 | 0.496 | 0       | 9  | IGFBP7   | Immune-Dendritic/Macrophage/Monocytes |
| 3.37E-205 | -0.3953334 | 0.219 | 0.446 | 7E-201  | 9  | HSPB1    | Immune-Dendritic/Macrophage/Monocytes |
| 3.796E-39 | -0.2963652 | 0.15  | 0.229 | 8.4E-35 | 9  | TIMP1    | Immune-Dendritic/Macrophage/Monocytes |
| 1.19E-160 | -0.4283262 | 0.15  | 0.33  | 3E-156  | 9  | FXYD2    | Immune-Dendritic/Macrophage/Monocytes |
| 5.02E-199 | -0.6330103 | 0.105 | 0.31  | 1E-194  | 9  | ADIRF    | Immune-Dendritic/Macrophage/Monocytes |
| 1.86E-136 | -0.2955705 | 0.792 | 0.863 | 4E-132  | 9  | NEAT1    | Immune-Dendritic/Macrophage/Monocytes |
| 2.48E-264 | -0.7964084 | 0.148 | 0.391 | 5E-260  | 9  | ATP1B1   | Immune-Dendritic/Macrophage/Monocytes |
| 5.65E-275 | -0.3862666 | 1     | 0.999 | 1E-270  | 9  | MALAT1   | Immune-Dendritic/Macrophage/Monocytes |
| 2.19E-271 | -0.589288  | 0.546 | 0.713 | 5E-267  | 9  | S100A6   | Immune-Dendritic/Macrophage/Monocytes |
| 2.16E-200 | -1.1255447 | 0.186 | 0.389 | 5E-196  | 9  | SPP1     | Immune-Dendritic/Macrophage/Monocytes |
| 2.408E-83 | -2.0640497 | 0.073 | 0.185 | 5.3E-79 | 9  | IGKC     | Immune-Dendritic/Macrophage/Monocytes |
| 0         | 1.67826644 | 0.637 | 0.073 | 0       | 10 | SLPI     | TAL                                   |
| 0         | 0.71712754 | 0.598 | 0.065 | 0       | 10 | ITGB6    | TAL                                   |
| 0         | 1.85482892 | 0.944 | 0.267 | 0       | 10 | WFDC2    | TAL                                   |
| 0         | 2.15508777 | 0.945 | 0.358 | 0       | 10 | SPP1     | TAL                                   |
| 0         | 0.43088827 | 0.275 | 0.027 | 0       | 10 | LTF      | TAL                                   |
| 0         | 0.39878775 | 0.353 | 0.037 | 0       | 10 | TSPAN8   | TAL                                   |
| 0         | 0.32445177 | 0.316 | 0.029 | 0       | 10 | LINC0150 | TAL                                   |
| 0         | 0.46500386 | 0.48  | 0.085 | 0       | 10 | C8orf4   | TAL                                   |
| 0         | 0.66875855 | 0.331 | 0.085 | 0       | 10 | UMOD     | TAL                                   |
| 0         | 0.58554165 | 0.671 | 0.152 | 0       | 10 | MUC1     | TAL                                   |
| 0         | 0.52480934 | 0.567 | 0.126 | 0       | 10 | BCAM     | TAL                                   |
| 0         | 0.36632937 | 0.359 | 0.056 | 0       | 10 | CLDN10   | TAL                                   |
| 0         | 0.3946949  | 0.26  | 0.045 | 0       | 10 | SFRP1    | TAL                                   |
| 0         | 0.44776165 | 0.515 | 0.107 | 0       | 10 | SERPINC1 | TAL                                   |
| 0         | 0.47893492 | 0.558 | 0.126 | 0       | 10 | PCSK1N   | TAL                                   |
| 0         | 0.67060951 | 0.727 | 0.241 | 0       | 10 | ATP1A1   | TAL                                   |
| 0         | 0.41927604 | 0.376 | 0.086 | 0       | 10 | NNMT     | TAL                                   |
| 0         | 0.66549985 | 0.851 | 0.323 | 0       | 10 | CD24     | TAL                                   |
| 0         | 0.31309606 | 0.364 | 0.071 | 0       | 10 | LINC0132 | TAL                                   |
| 0         | 0.46763299 | 0.497 | 0.145 | 0       | 10 | MMP7     | TAL                                   |
| 0         | 0.58899912 | 0.78  | 0.304 | 0       | 10 | FXYD2    | TAL                                   |
| 0         | 0.83476823 | 0.813 | 0.467 | 0       | 10 | IGFBP7   | TAL                                   |
| 0         | 0.36491673 | 0.423 | 0.111 | 0       | 10 | TACSTD2  | TAL                                   |

|           |            |       |       |         |    |          |     |
|-----------|------------|-------|-------|---------|----|----------|-----|
| 0         | 0.29096276 | 0.339 | 0.076 | 0       | 10 | KRT7     | TAL |
| 0         | 0.28339679 | 0.351 | 0.082 | 0       | 10 | RASD1    | TAL |
| 0         | 0.26174328 | 0.289 | 0.063 | 0       | 10 | ADAMTS1  | TAL |
| 0         | 0.42937692 | 0.776 | 0.285 | 0       | 10 | DEFB1    | TAL |
| 0         | 0.45369539 | 0.647 | 0.255 | 0       | 10 | LDHB     | TAL |
| 0         | 0.26427136 | 0.319 | 0.078 | 0       | 10 | CLDN4    | TAL |
| 0         | 0.45412575 | 0.708 | 0.316 | 0       | 10 | CTSD     | TAL |
| 0         | 0.4207721  | 0.607 | 0.254 | 0       | 10 | CD59     | TAL |
| 0         | 0.33996483 | 0.468 | 0.163 | 0       | 10 | S100A2   | TAL |
| 0         | 0.28150121 | 0.417 | 0.122 | 0       | 10 | MAL      | TAL |
| 0         | 0.29574879 | 0.367 | 0.113 | 0       | 10 | ELF3     | TAL |
| 0         | 0.4004624  | 0.445 | 0.206 | 0       | 10 | CRYAB    | TAL |
| 0         | 0.33870866 | 0.559 | 0.245 | 0       | 10 | PEBP1    | TAL |
| 0         | 0.57320472 | 0.936 | 0.697 | 0       | 10 | S100A6   | TAL |
| 0         | 0.29528982 | 0.457 | 0.176 | 0       | 10 | EMX2     | TAL |
| 0         | 0.32104652 | 0.499 | 0.214 | 0       | 10 | LDHA     | TAL |
| 0         | 0.25582894 | 0.42  | 0.144 | 0       | 10 | CDH16    | TAL |
| 0         | 0.38521622 | 0.697 | 0.367 | 0       | 10 | GSTP1    | TAL |
| 0         | 0.32658649 | 0.617 | 0.279 | 0       | 10 | CLU      | TAL |
| 0         | 0.29736285 | 0.456 | 0.19  | 0       | 10 | TSC22D1  | TAL |
| 0         | 0.2857165  | 0.481 | 0.203 | 0       | 10 | S100A13  | TAL |
| 1.25E-287 | 0.33426087 | 0.461 | 0.233 | 3E-283  | 10 | GADD45B  | TAL |
| 4.99E-246 | 0.39153278 | 0.665 | 0.428 | 1E-241  | 10 | HSPB1    | TAL |
| 1.46E-252 | 0.26711598 | 0.393 | 0.186 | 3E-248  | 10 | SOX4     | TAL |
| 1.217E-88 | 0.2951992  | 0.192 | 0.102 | 2.7E-84 | 10 | SERPINA1 | TAL |
| 0         | 0.36430168 | 0.846 | 0.564 | 0       | 10 | SAT1     | TAL |
| 7.71E-140 | 0.26651757 | 0.25  | 0.123 | 2E-135  | 10 | PLCG2    | TAL |
| 0         | 0.31823443 | 0.746 | 0.44  | 0       | 10 | S100A11  | TAL |
| 3.89E-301 | 0.25506314 | 0.662 | 0.376 | 9E-297  | 10 | PPDPF    | TAL |
| 0         | 0.40197431 | 1     | 1     | 0       | 10 | MT-CO1   | TAL |
| 1.43E-154 | 0.31365018 | 1     | 0.999 | 3E-150  | 10 | MALAT1   | TAL |
| 1.18E-177 | 0.26201542 | 1     | 1     | 3E-173  | 10 | MT-CO2   | TAL |
| 1.18E-123 | -0.2901114 | 0.029 | 0.164 | 3E-119  | 10 | FCER1G   | TAL |
| 9.187E-86 | -0.3164747 | 0.021 | 0.12  | 2E-81   | 10 | C1QA     | TAL |
| 3.61E-161 | -0.371168  | 0.034 | 0.202 | 8E-157  | 10 | AIF1     | TAL |
| 9.28E-156 | -0.362105  | 0.036 | 0.202 | 2E-151  | 10 | TYROBP   | TAL |
| 9.92E-127 | -0.3119196 | 0.041 | 0.185 | 2E-122  | 10 | RGS1     | TAL |
| 1.658E-78 | -0.3040036 | 0.029 | 0.124 | 3.7E-74 | 10 | CCL3     | TAL |
| 1.47E-82  | -0.2585447 | 0.051 | 0.159 | 3.2E-78 | 10 | CCL5     | TAL |
| 6.109E-71 | -0.2723012 | 0.042 | 0.136 | 1.3E-66 | 10 | CCL4     | TAL |
| 5.74E-168 | -0.3221041 | 0.068 | 0.253 | 1E-163  | 10 | CXCR4    | TAL |
| 2.02E-118 | -0.2748029 | 0.07  | 0.215 | 4E-114  | 10 | HLA-DPA1 | TAL |
| 1.85E-110 | -0.4342723 | 0.034 | 0.16  | 4E-106  | 10 | LYZ      | TAL |
| 0         | -0.5271764 | 0.061 | 0.34  | 0       | 10 | SRGN     | TAL |
| 8.085E-59 | -0.2723128 | 0.054 | 0.14  | 1.8E-54 | 10 | SPARCL1  | TAL |
| 3.12E-136 | -0.3408883 | 0.079 | 0.241 | 7E-132  | 10 | HLA-DPB1 | TAL |
| 4.36E-103 | -0.2531945 | 0.118 | 0.262 | 1E-98   | 10 | IL32     | TAL |
| 3.7E-179  | -0.3643639 | 0.106 | 0.308 | 8E-175  | 10 | S100A4   | TAL |

|           |            |       |       |         |    |         |     |
|-----------|------------|-------|-------|---------|----|---------|-----|
| 8.61E-283 | -0.4523543 | 0.107 | 0.377 | 2E-278  | 10 | VIM     | TAL |
| 1.292E-96 | -0.3715032 | 0.068 | 0.194 | 2.9E-92 | 10 | APOE    | TAL |
| 1.73E-144 | -0.2925386 | 0.165 | 0.343 | 4E-140  | 10 | SH3BGRL | TAL |
| 6.143E-46 | -0.2897586 | 0.086 | 0.166 | 1.4E-41 | 10 | MGP     | TAL |
| 1.94E-112 | -0.2707545 | 0.246 | 0.402 | 4E-108  | 10 | BTG1    | TAL |
| 1.405E-58 | -0.3985611 | 0.075 | 0.166 | 3.1E-54 | 10 | IGFBP5  | TAL |
| 1.01E-246 | -0.5657067 | 0.129 | 0.377 | 2E-242  | 10 | LGALS1  | TAL |
| 4.24E-225 | -0.385963  | 0.24  | 0.474 | 9E-221  | 10 | PABPC1  | TAL |
| 7.56E-105 | -0.2707711 | 0.642 | 0.695 | 2E-100  | 10 | RPS26   | TAL |
| 6.47E-107 | -0.3409287 | 0.387 | 0.523 | 1E-102  | 10 | DUSP1   | TAL |
| 1.66E-154 | -0.2628185 | 0.883 | 0.896 | 4E-150  | 10 | RPS15   | TAL |
| 9.39E-119 | -0.2725165 | 0.838 | 0.86  | 2E-114  | 10 | RPS8    | TAL |
| 1.089E-88 | -0.2846458 | 0.841 | 0.86  | 2.4E-84 | 10 | TMSB10  | TAL |
| 1.84E-168 | -0.3312228 | 0.773 | 0.826 | 4E-164  | 10 | RPS15A  | TAL |
| 2.14E-232 | -0.3327533 | 0.915 | 0.928 | 5E-228  | 10 | RPS29   | TAL |
| 2.1E-186  | -0.3948647 | 0.688 | 0.81  | 5E-182  | 10 | MT-ND4L | TAL |
| 5.07E-198 | -0.3529306 | 0.964 | 0.97  | 1E-193  | 10 | RPS27   | TAL |
| 2.49E-202 | -0.7927664 | 0.174 | 0.384 | 5E-198  | 10 | HLA-DRA | TAL |
| 1.581E-65 | -0.4398418 | 0.387 | 0.464 | 3.5E-61 | 10 | CD74    | TAL |
| 4.94E-233 | -0.3948334 | 0.936 | 0.941 | 1E-228  | 10 | RPL39   | TAL |
| 2.39E-227 | -0.4711726 | 0.783 | 0.834 | 5E-223  | 10 | ACTB    | TAL |
| 1.14E-103 | -0.4415762 | 0.97  | 0.949 | 3E-99   | 10 | B2M     | TAL |
| 7.236E-14 | -0.6688691 | 0.203 | 0.242 | 1.6E-09 | 10 | MT1G    | TAL |
| 1.353E-38 | -0.6590992 | 0.793 | 0.787 | 3E-34   | 10 | FTL     | TAL |
| 0         | -0.9326898 | 0.683 | 0.895 | 0       | 10 | TMSB4X  | TAL |
| 9.357E-80 | -2.0311756 | 0.072 | 0.185 | 2.1E-75 | 10 | IGKC    | TAL |
| 0         | 2.27331165 | 1     | 0.061 | 0       | 11 | UMOD    | TAL |
| 0         | 1.51843229 | 0.922 | 0.07  | 0       | 11 | SLC12A1 | TAL |
| 0         | 0.40677314 | 0.366 | 0.011 | 0       | 11 | EGF     | TAL |
| 0         | 0.58960354 | 0.57  | 0.04  | 0       | 11 | KNG1    | TAL |
| 0         | 0.41567914 | 0.359 | 0.028 | 0       | 11 | CLDN16  | TAL |
| 0         | 0.31973024 | 0.33  | 0.034 | 0       | 11 | HSPA2   | TAL |
| 0         | 0.3682583  | 0.351 | 0.042 | 0       | 11 | SFRP1   | TAL |
| 0         | 1.1273989  | 0.967 | 0.36  | 0       | 11 | ATP1B1  | TAL |
| 0         | 0.35358497 | 0.378 | 0.053 | 0       | 11 | CYFIP2  | TAL |
| 0         | 0.26090181 | 0.287 | 0.032 | 0       | 11 | CLCN5   | TAL |
| 0         | 0.29874706 | 0.338 | 0.047 | 0       | 11 | MTURN   | TAL |
| 0         | 0.25135903 | 0.281 | 0.034 | 0       | 11 | PDE1A   | TAL |
| 0         | 0.68738088 | 0.851 | 0.284 | 0       | 11 | DEFB1   | TAL |
| 0         | 0.42309669 | 0.489 | 0.115 | 0       | 11 | NUDT4   | TAL |
| 0         | 0.28309918 | 0.32  | 0.051 | 0       | 11 | PTGER3  | TAL |
| 0         | 0.2517294  | 0.289 | 0.043 | 0       | 11 | CGNL1   | TAL |
| 0         | 0.31197172 | 0.357 | 0.066 | 0       | 11 | RHOBTB3 | TAL |
| 0         | 0.28599619 | 0.327 | 0.058 | 0       | 11 | CLDN10  | TAL |
| 0         | 0.51873027 | 0.694 | 0.244 | 0       | 11 | ATP1A1  | TAL |
| 0         | 0.45258082 | 0.492 | 0.151 | 0       | 11 | PDK4    | TAL |
| 0         | 0.55300135 | 0.801 | 0.327 | 0       | 11 | CD24    | TAL |
| 0         | 0.27959197 | 0.348 | 0.073 | 0       | 11 | EFHD1   | TAL |

|           |            |       |       |         |    |          |     |
|-----------|------------|-------|-------|---------|----|----------|-----|
| 0         | 0.36894074 | 0.342 | 0.102 | 0       | 11 | TMEM52B  | TAL |
| 0         | 0.33538665 | 0.397 | 0.11  | 0       | 11 | SLC5A3   | TAL |
| 0         | 0.43182511 | 0.546 | 0.205 | 0       | 11 | ZFAND5   | TAL |
| 0         | 0.4191886  | 0.696 | 0.309 | 0       | 11 | FXVD2    | TAL |
| 0         | 0.39134393 | 0.58  | 0.245 | 0       | 11 | PEBP1    | TAL |
| 0         | 0.29654573 | 0.435 | 0.144 | 0       | 11 | KCNJ16   | TAL |
| 0         | 0.2584633  | 0.352 | 0.103 | 0       | 11 | MRPS6    | TAL |
| 0         | 0.40643019 | 0.651 | 0.323 | 0       | 11 | MTRNR2L  | TAL |
| 0         | 0.77264833 | 1     | 0.995 | 0       | 11 | MT-ND2   | TAL |
| 0         | 0.68117393 | 1     | 0.963 | 0       | 11 | MT-ND1   | TAL |
| 0         | 0.68673811 | 1     | 1     | 0       | 11 | MT-CO3   | TAL |
| 0         | 0.32276089 | 0.576 | 0.279 | 0       | 11 | APP      | TAL |
| 0         | 0.65050052 | 1     | 0.999 | 0       | 11 | MT-ND3   | TAL |
| 0         | 0.29748492 | 0.533 | 0.261 | 0       | 11 | LDHB     | TAL |
| 2.04E-171 | 0.27507448 | 0.269 | 0.123 | 5E-167  | 11 | PLCG2    | TAL |
| 0         | 0.57414465 | 1     | 1     | 0       | 11 | MT-CO1   | TAL |
| 3.54E-265 | 0.30862379 | 0.595 | 0.344 | 8E-261  | 11 | MT-ND6   | TAL |
| 0         | 0.52946431 | 1     | 0.992 | 0       | 11 | MT-CYB   | TAL |
| 0         | 0.42994731 | 0.979 | 0.798 | 0       | 11 | MT-ND4L  | TAL |
| 2.78E-281 | 0.27179059 | 0.532 | 0.276 | 6E-277  | 11 | NGFRAP1  | TAL |
| 0         | 0.48687241 | 1     | 1     | 0       | 11 | MT-CO2   | TAL |
| 0         | 0.46563393 | 1     | 0.994 | 0       | 11 | MT-ATP6  | TAL |
| 0         | 0.42515247 | 0.996 | 0.922 | 0       | 11 | MT-ND5   | TAL |
| 0         | 0.45438291 | 1     | 0.999 | 0       | 11 | MT-ND4   | TAL |
| 2.233E-88 | -0.257945  | 0.004 | 0.102 | 4.9E-84 | 11 | C1QB     | TAL |
| 8.32E-101 | -0.339608  | 0.008 | 0.12  | 1.8E-96 | 11 | C1QA     | TAL |
| 5.92E-162 | -0.285871  | 0.016 | 0.188 | 1E-157  | 11 | CD52     | TAL |
| 3.6E-117  | -0.2508403 | 0.017 | 0.15  | 8E-113  | 11 | RNASE1   | TAL |
| 3.36E-129 | -0.3061437 | 0.019 | 0.164 | 7E-125  | 11 | FCER1G   | TAL |
| 1.18E-123 | -0.309311  | 0.02  | 0.16  | 3E-119  | 11 | CCL5     | TAL |
| 9.24E-162 | -0.3867966 | 0.026 | 0.202 | 2E-157  | 11 | AIF1     | TAL |
| 2.31E-196 | -0.4460885 | 0.027 | 0.233 | 5E-192  | 11 | TIMP1    | TAL |
| 2.05E-129 | -0.2872155 | 0.034 | 0.186 | 5E-125  | 11 | SPARC    | TAL |
| 2.01E-125 | -0.2862786 | 0.034 | 0.182 | 4E-121  | 11 | IFI27    | TAL |
| 2.949E-91 | -0.311467  | 0.024 | 0.137 | 6.5E-87 | 11 | CCL4     | TAL |
| 4.778E-81 | -0.3236076 | 0.023 | 0.124 | 1.1E-76 | 11 | CCL3     | TAL |
| 2.66E-149 | -0.3743556 | 0.033 | 0.201 | 6E-145  | 11 | TYROBP   | TAL |
| 1.99E-149 | -0.3091515 | 0.043 | 0.216 | 4E-145  | 11 | HLA-DPA1 | TAL |
| 4.91E-201 | -0.3488362 | 0.048 | 0.264 | 1E-196  | 11 | IL32     | TAL |
| 7.08E-183 | -0.3879475 | 0.042 | 0.242 | 2E-178  | 11 | HLA-DPB1 | TAL |
| 2.277E-94 | -0.3173955 | 0.032 | 0.15  | 5E-90   | 11 | CXCL2    | TAL |
| 7.91E-193 | -0.2685047 | 0.079 | 0.3   | 2E-188  | 11 | HLA-E    | TAL |
| 6.23E-110 | -0.3061695 | 0.045 | 0.184 | 1E-105  | 11 | RGS1     | TAL |
| 2.7E-135  | -0.2826874 | 0.061 | 0.229 | 6E-131  | 11 | HLA-DRB1 | TAL |
| 9.86E-244 | -0.4453086 | 0.06  | 0.309 | 2E-239  | 11 | S100A4   | TAL |
| 7.25E-265 | -0.385383  | 0.078 | 0.345 | 2E-260  | 11 | SH3BGR1  | TAL |
| 2.384E-72 | -0.3085495 | 0.041 | 0.14  | 5.3E-68 | 11 | SPARCL1  | TAL |
| 0         | -0.5189158 | 0.067 | 0.378 | 0       | 11 | VIM      | TAL |

|           |            |       |       |         |    |         |     |
|-----------|------------|-------|-------|---------|----|---------|-----|
| 1.374E-71 | -0.3194407 | 0.042 | 0.142 | 3E-67   | 11 | CTGF    | TAL |
| 8.8E-286  | -0.5254755 | 0.061 | 0.339 | 2E-281  | 11 | SRGN    | TAL |
| 9.845E-95 | -0.3837151 | 0.044 | 0.168 | 2.2E-90 | 11 | MGP     | TAL |
| 6.22E-126 | -0.2950089 | 0.087 | 0.252 | 1E-121  | 11 | CXCR4   | TAL |
| 2.54E-95  | -0.4364014 | 0.038 | 0.159 | 5.6E-91 | 11 | LYZ     | TAL |
| 2.07E-270 | -0.3484654 | 0.122 | 0.402 | 5E-266  | 11 | HLA-C   | TAL |
| 2.16E-182 | -0.2680977 | 0.173 | 0.399 | 5E-178  | 11 | CFL1    | TAL |
| 2.43E-157 | -0.2964775 | 0.133 | 0.332 | 5E-153  | 11 | DNAJB1  | TAL |
| 0         | -0.6911208 | 0.067 | 0.379 | 0       | 11 | LGALS1  | TAL |
| 4.08E-146 | -0.2936979 | 0.136 | 0.326 | 9E-142  | 11 | GPX1    | TAL |
| 1.66E-263 | -0.4197821 | 0.119 | 0.39  | 4E-259  | 11 | CYBA    | TAL |
| 2.593E-47 | -0.2676232 | 0.078 | 0.162 | 5.7E-43 | 11 | MMP7    | TAL |
| 1.15E-94  | -0.3943576 | 0.065 | 0.194 | 2.5E-90 | 11 | APOE    | TAL |
| 1.44E-217 | -0.3363055 | 0.162 | 0.406 | 3E-213  | 11 | MYL12A  | TAL |
| 4.08E-200 | -0.3582238 | 0.145 | 0.379 | 9E-196  | 11 | FOSB    | TAL |
| 4.3E-168  | -2.1654524 | 0.012 | 0.187 | 9E-164  | 11 | IGKC    | TAL |
| 2.56E-146 | -0.2656882 | 0.227 | 0.429 | 6E-142  | 11 | UBC     | TAL |
| 3.94E-274 | -0.4629711 | 0.123 | 0.402 | 9E-270  | 11 | IFITM3  | TAL |
| 0         | -0.418022  | 0.158 | 0.463 | 0       | 11 | S100A11 | TAL |
| 4.55E-150 | -0.2910785 | 0.191 | 0.389 | 1E-145  | 11 | JUNB    | TAL |
| 0         | -0.4570231 | 0.153 | 0.488 | 0       | 11 | PFN1    | TAL |
| 8.64E-152 | -0.2708345 | 0.229 | 0.431 | 2E-147  | 11 | CD63    | TAL |
| 7.849E-77 | -0.3268679 | 0.101 | 0.22  | 1.7E-72 | 11 | CRYAB   | TAL |
| 4.04E-152 | -0.2590229 | 0.295 | 0.498 | 9E-148  | 11 | PFDN5   | TAL |
| 4.18E-102 | -0.2909824 | 0.17  | 0.32  | 9.2E-98 | 11 | NPC2    | TAL |
| 1.56E-263 | -0.3830693 | 0.191 | 0.466 | 3E-259  | 11 | HLA-A   | TAL |
| 1.993E-70 | -0.2653286 | 0.185 | 0.303 | 4.4E-66 | 11 | NFKBIA  | TAL |
| 2.86E-141 | -0.2511555 | 0.359 | 0.549 | 6E-137  | 11 | RPL24   | TAL |
| 1.77E-150 | -0.2689547 | 0.316 | 0.511 | 4E-146  | 11 | EEF1D   | TAL |
| 0         | -0.5609969 | 0.161 | 0.537 | 0       | 11 | HLA-B   | TAL |
| 7.559E-74 | -0.2532995 | 0.259 | 0.385 | 1.7E-69 | 11 | ZFP36   | TAL |
| 7.3E-141  | -0.2590326 | 0.401 | 0.582 | 2E-136  | 11 | RPS11   | TAL |
| 1.69E-140 | -0.2842085 | 0.323 | 0.51  | 4E-136  | 11 | UBB     | TAL |
| 9.42E-170 | -0.2933652 | 0.334 | 0.542 | 2E-165  | 11 | RPL14   | TAL |
| 9.03E-150 | -0.2745914 | 0.374 | 0.561 | 2E-145  | 11 | RPS7    | TAL |
| 3.45E-257 | -0.3549273 | 0.293 | 0.558 | 8E-253  | 11 | RPL27   | TAL |
| 2.24E-180 | -0.3029808 | 0.351 | 0.565 | 5E-176  | 11 | RPL29   | TAL |
| 7.65E-221 | -0.3389977 | 0.303 | 0.544 | 2E-216  | 11 | RPL30   | TAL |
| 1.18E-138 | -0.2808876 | 0.372 | 0.55  | 3E-134  | 11 | MYL6    | TAL |
| 2.77E-246 | -0.4202149 | 0.216 | 0.474 | 6E-242  | 11 | PABPC1  | TAL |
| 1.54E-137 | -0.2591758 | 0.485 | 0.65  | 3E-133  | 11 | EIF1    | TAL |
| 9.41E-214 | -0.3238697 | 0.364 | 0.597 | 2E-209  | 11 | RPL18   | TAL |
| 3.407E-45 | -0.3907138 | 0.084 | 0.166 | 7.5E-41 | 11 | IGFBP5  | TAL |
| 2.31E-198 | -0.3080157 | 0.409 | 0.626 | 5E-194  | 11 | RPL38   | TAL |
| 1.01E-236 | -0.351191  | 0.335 | 0.584 | 2E-232  | 11 | RPL10A  | TAL |
| 1.2E-131  | -0.2552383 | 0.54  | 0.684 | 3E-127  | 11 | RPL8    | TAL |
| 1.37E-136 | -0.4992123 | 0.121 | 0.298 | 3E-132  | 11 | CLU     | TAL |
| 4.98E-158 | -0.2952196 | 0.412 | 0.597 | 1E-153  | 11 | RPS5    | TAL |

|           |            |       |       |         |    |         |     |
|-----------|------------|-------|-------|---------|----|---------|-----|
| 1.83E-163 | -0.2863396 | 0.47  | 0.647 | 4E-159  | 11 | RPS20   | TAL |
| 6.4E-136  | -0.27037   | 0.524 | 0.678 | 1E-131  | 11 | RPL31   | TAL |
| 6.52E-187 | -0.2899092 | 0.501 | 0.69  | 1E-182  | 11 | SERF2   | TAL |
| 1.04E-275 | -0.3726773 | 0.359 | 0.623 | 2E-271  | 11 | UBA52   | TAL |
| 5.06E-187 | -0.3135167 | 0.428 | 0.622 | 1E-182  | 11 | RPS16   | TAL |
| 1.94E-214 | -0.3135611 | 0.477 | 0.687 | 4E-210  | 11 | FAU     | TAL |
| 3.61E-149 | -0.2833999 | 0.543 | 0.69  | 8E-145  | 11 | RPL15   | TAL |
| 1.66E-194 | -0.3268823 | 0.436 | 0.638 | 4E-190  | 11 | RPL37   | TAL |
| 3.69E-157 | -0.359882  | 0.334 | 0.529 | 8E-153  | 11 | JUN     | TAL |
| 1.05E-118 | -0.3494273 | 0.307 | 0.472 | 2E-114  | 11 | HSPA1A  | TAL |
| 2.1E-106  | -0.3467431 | 0.285 | 0.433 | 5E-102  | 11 | CST3    | TAL |
| 1.4E-124  | -0.2716212 | 0.641 | 0.759 | 3E-120  | 11 | RPL7    | TAL |
| 0         | -0.7588328 | 0.145 | 0.473 | 0       | 11 | CD74    | TAL |
| 3.94E-298 | -0.9133132 | 0.1   | 0.386 | 9E-294  | 11 | HLA-DRA | TAL |
| 1.257E-75 | -0.323004  | 0.324 | 0.441 | 2.8E-71 | 11 | HSPB1   | TAL |
| 5.61E-256 | -0.3661113 | 0.431 | 0.662 | 1E-251  | 11 | RPS9    | TAL |
| 4.41E-209 | -0.3338419 | 0.522 | 0.705 | 1E-204  | 11 | RPS17   | TAL |
| 4.11E-161 | -0.2855567 | 0.727 | 0.833 | 9E-157  | 11 | RPS23   | TAL |
| 2.02E-175 | -0.3472052 | 0.467 | 0.643 | 4E-171  | 11 | H3F3B   | TAL |
| 1.33E-276 | -0.386195  | 0.487 | 0.71  | 3E-272  | 11 | RPL19   | TAL |
| 2.06E-209 | -0.3478086 | 0.547 | 0.716 | 5E-205  | 11 | RPS13   | TAL |
| 0         | -0.4914343 | 0.371 | 0.665 | 0       | 11 | RPS3    | TAL |
| 4.42E-236 | -0.3575314 | 0.6   | 0.779 | 1E-231  | 11 | RPL23A  | TAL |
| 6.29E-257 | -0.3761056 | 0.559 | 0.759 | 1E-252  | 11 | RPS24   | TAL |
| 4.27E-186 | -0.462054  | 0.322 | 0.525 | 9E-182  | 11 | DUSP1   | TAL |
| 1.61E-271 | -0.4173866 | 0.477 | 0.701 | 4E-267  | 11 | RPS26   | TAL |
| 2.72E-243 | -0.3842831 | 0.554 | 0.741 | 6E-239  | 11 | RPL3    | TAL |
| 1.96E-302 | -0.3956687 | 0.589 | 0.804 | 4E-298  | 11 | RPS25   | TAL |
| 8.346E-13 | -0.2847155 | 0.492 | 0.48  | 1.8E-08 | 11 | IGFBP7  | TAL |
| 2.028E-64 | -0.3414295 | 0.498 | 0.577 | 4.5E-60 | 11 | SAT1    | TAL |
| 2.13E-127 | -0.3233479 | 0.804 | 0.862 | 5E-123  | 11 | NEAT1   | TAL |
| 0         | -0.4503655 | 0.513 | 0.765 | 0       | 11 | RPL35A  | TAL |
| 0         | -0.4498807 | 0.488 | 0.723 | 0       | 11 | RPS4X   | TAL |
| 5.91E-233 | -0.3932773 | 0.595 | 0.762 | 1E-228  | 11 | RPS3A   | TAL |
| 0         | -0.3958895 | 0.664 | 0.845 | 0       | 11 | RPL35   | TAL |
| 0         | -0.483399  | 0.481 | 0.745 | 0       | 11 | RPL27A  | TAL |
| 6.86E-265 | -0.4474141 | 0.505 | 0.718 | 2E-260  | 11 | HSP90AA | TAL |
| 0         | -0.4268188 | 0.597 | 0.808 | 0       | 11 | RPL11   | TAL |
| 0         | -0.3944021 | 0.692 | 0.863 | 0       | 11 | RPL36   | TAL |
| 0         | -0.6377337 | 0.362 | 0.714 | 0       | 11 | RPS2    | TAL |
| 1.96E-288 | -0.3722869 | 0.777 | 0.893 | 4E-284  | 11 | RPS28   | TAL |
| 1.012E-52 | -0.3356111 | 0.683 | 0.707 | 2.2E-48 | 11 | S100A6  | TAL |
| 1.79E-305 | -0.4150333 | 0.664 | 0.843 | 4E-301  | 11 | RPL26   | TAL |
| 0.0014602 | -0.2836146 | 0.32  | 0.274 | 1       | 11 | MT1X    | TAL |
| 4.7E-223  | -0.3561784 | 0.877 | 0.929 | 1E-218  | 11 | RPS29   | TAL |
| 0         | -0.3871225 | 0.821 | 0.922 | 0       | 11 | RPS27A  | TAL |
| 0         | -0.514292  | 0.521 | 0.761 | 0       | 11 | RPL18A  | TAL |
| 0         | -0.4159179 | 0.752 | 0.885 | 0       | 11 | RPS14   | TAL |

|           |            |       |       |         |    |          |             |
|-----------|------------|-------|-------|---------|----|----------|-------------|
| 0         | -0.5020531 | 0.58  | 0.819 | 0       | 11 | RPL12    | TAL         |
| 7.248E-21 | -0.4276553 | 0.261 | 0.304 | 1.6E-16 | 11 | ADIRF    | TAL         |
| 0         | -0.4587504 | 0.688 | 0.856 | 0       | 11 | RPS6     | TAL         |
| 0         | -0.5509515 | 0.553 | 0.811 | 0       | 11 | RPL28    | TAL         |
| 0         | -0.4608705 | 0.708 | 0.865 | 0       | 11 | RPS8     | TAL         |
| 0         | -0.5079604 | 0.66  | 0.865 | 0       | 11 | RPS12    | TAL         |
| 0         | -0.4345425 | 0.859 | 0.942 | 0       | 11 | PTMA     | TAL         |
| 0         | -0.4074833 | 0.953 | 0.98  | 0       | 11 | RPL34    | TAL         |
| 0         | -0.6010541 | 0.563 | 0.842 | 0       | 11 | RPLP2    | TAL         |
| 0         | -0.5799191 | 0.589 | 0.833 | 0       | 11 | RPS15A   | TAL         |
| 0         | -0.5191666 | 0.714 | 0.902 | 0       | 11 | RPS15    | TAL         |
| 0         | -0.4504433 | 0.912 | 0.969 | 0       | 11 | RPL41    | TAL         |
| 0         | -0.6879064 | 0.455 | 0.692 | 0       | 11 | FOS      | TAL         |
| 0         | -0.5886046 | 0.704 | 0.91  | 0       | 11 | RPL32    | TAL         |
| 0         | -0.5483743 | 0.771 | 0.918 | 0       | 11 | RPL13A   | TAL         |
| 0         | -0.5614581 | 0.774 | 0.925 | 0       | 11 | RPL13    | TAL         |
| 0         | -0.5281433 | 0.877 | 0.944 | 0       | 11 | RPL39    | TAL         |
| 0         | -0.651935  | 0.615 | 0.808 | 0       | 11 | FTH1     | TAL         |
| 0         | -0.5672023 | 0.838 | 0.952 | 0       | 11 | RPL21    | TAL         |
| 0         | -0.6269465 | 0.719 | 0.901 | 0       | 11 | RPS19    | TAL         |
| 0         | -0.5837039 | 0.799 | 0.928 | 0       | 11 | RPS18    | TAL         |
| 0         | -0.7603286 | 0.558 | 0.842 | 0       | 11 | ACTB     | TAL         |
| 0         | -0.6337162 | 0.75  | 0.928 | 0       | 11 | RPLP1    | TAL         |
| 0         | -0.7160938 | 0.739 | 0.921 | 0       | 11 | RPL10    | TAL         |
| 0         | -0.9750948 | 0.545 | 0.871 | 0       | 11 | TMSB10   | TAL         |
| 0         | -0.7043759 | 0.885 | 0.973 | 0       | 11 | RPS27    | TAL         |
| 0         | -1.6655826 | 0.386 | 0.905 | 0       | 11 | TMSB4X   | TAL         |
| 0         | -1.1179516 | 0.554 | 0.796 | 0       | 11 | FTL      | TAL         |
| 0         | -1.3353511 | 0.796 | 0.956 | 0       | 11 | B2M      | TAL         |
| 0         | 1.55499017 | 0.793 | 0.033 | 0       | 12 | RGS5     | Pericyte/SM |
| 0         | 0.49767786 | 0.373 | 0.005 | 0       | 12 | RERGL    | Pericyte/SM |
| 0         | 0.59452451 | 0.43  | 0.007 | 0       | 12 | PLN      | Pericyte/SM |
| 0         | 1.07213509 | 0.624 | 0.023 | 0       | 12 | ACTA2    | Pericyte/SM |
| 0         | 0.68724582 | 0.53  | 0.014 | 0       | 12 | MYH11    | Pericyte/SM |
| 0         | 1.63316297 | 0.797 | 0.064 | 0       | 12 | TAGLN    | Pericyte/SM |
| 0         | 0.57224029 | 0.456 | 0.024 | 0       | 12 | C11orf96 | Pericyte/SM |
| 0         | 0.86380053 | 0.597 | 0.052 | 0       | 12 | TPM2     | Pericyte/SM |
| 0         | 0.2905619  | 0.25  | 0.009 | 0       | 12 | NDUFA4L  | Pericyte/SM |
| 0         | 0.41602303 | 0.385 | 0.02  | 0       | 12 | PLAC9    | Pericyte/SM |
| 0         | 1.0622871  | 0.712 | 0.1   | 0       | 12 | MYL9     | Pericyte/SM |
| 0         | 0.43493844 | 0.375 | 0.022 | 0       | 12 | MFGE8    | Pericyte/SM |
| 0         | 0.27077805 | 0.251 | 0.01  | 0       | 12 | FRZB     | Pericyte/SM |
| 0         | 1.15421059 | 0.835 | 0.159 | 0       | 12 | CALD1    | Pericyte/SM |
| 0         | 1.68177443 | 0.923 | 0.28  | 0       | 12 | ADIRF    | Pericyte/SM |
| 0         | 0.25477529 | 0.259 | 0.015 | 0       | 12 | NOTCH3   | Pericyte/SM |
| 0         | 0.30945597 | 0.279 | 0.021 | 0       | 12 | PTP4A3   | Pericyte/SM |
| 0         | 0.28932531 | 0.282 | 0.021 | 0       | 12 | CSRP2    | Pericyte/SM |
| 0         | 0.83787448 | 0.669 | 0.146 | 0       | 12 | MGP      | Pericyte/SM |

|           |            |       |       |         |    |         |             |
|-----------|------------|-------|-------|---------|----|---------|-------------|
| 0         | 0.64353795 | 0.57  | 0.121 | 0       | 12 | SPARCL1 | Pericyte/SM |
| 0         | 0.7459732  | 0.641 | 0.158 | 0       | 12 | TIMP3   | Pericyte/SM |
| 0         | 0.78267587 | 0.672 | 0.174 | 0       | 12 | CRIP1   | Pericyte/SM |
| 0         | 0.25822449 | 0.275 | 0.025 | 0       | 12 | LHFP    | Pericyte/SM |
| 0         | 0.26393827 | 0.25  | 0.024 | 0       | 12 | PPP1R14 | Pericyte/SM |
| 0         | 0.45604238 | 0.373 | 0.063 | 0       | 12 | MT1M    | Pericyte/SM |
| 0         | 0.35147053 | 0.385 | 0.051 | 0       | 12 | SOD3    | Pericyte/SM |
| 0         | 0.3714598  | 0.389 | 0.055 | 0       | 12 | MYLK    | Pericyte/SM |
| 0         | 0.26662453 | 0.24  | 0.028 | 0       | 12 | SNCG    | Pericyte/SM |
| 0         | 0.30775074 | 0.28  | 0.038 | 0       | 12 | PTN     | Pericyte/SM |
| 0         | 0.31307866 | 0.334 | 0.049 | 0       | 12 | BGN     | Pericyte/SM |
| 0         | 0.86216583 | 0.805 | 0.41  | 0       | 12 | DSTN    | Pericyte/SM |
| 0         | 0.94165664 | 0.87  | 0.5   | 0       | 12 | MT2A    | Pericyte/SM |
| 0         | 0.30148861 | 0.329 | 0.061 | 0       | 12 | LBH     | Pericyte/SM |
| 0         | 0.41531506 | 0.458 | 0.119 | 0       | 12 | A2M     | Pericyte/SM |
| 0         | 0.39698236 | 0.549 | 0.149 | 0       | 12 | IGFBP5  | Pericyte/SM |
| 0         | 0.25363484 | 0.22  | 0.04  | 0       | 12 | HOPX    | Pericyte/SM |
| 0         | 0.4427062  | 0.536 | 0.189 | 0       | 12 | TSC22D1 | Pericyte/SM |
| 0         | 0.27610912 | 0.364 | 0.083 | 0       | 12 | CAV1    | Pericyte/SM |
| 0         | 0.41235602 | 0.506 | 0.176 | 0       | 12 | TPM1    | Pericyte/SM |
| 0         | 0.30024559 | 0.349 | 0.099 | 0       | 12 | FLNA    | Pericyte/SM |
| 0         | 0.47289582 | 0.543 | 0.267 | 0       | 12 | MT1X    | Pericyte/SM |
| 0         | 0.2714471  | 0.359 | 0.102 | 0       | 12 | EPAS1   | Pericyte/SM |
| 0         | 0.3954778  | 0.54  | 0.226 | 0       | 12 | MT1E    | Pericyte/SM |
| 0         | 0.33979623 | 0.43  | 0.16  | 0       | 12 | SELM    | Pericyte/SM |
| 0         | 0.31112241 | 0.428 | 0.148 | 0       | 12 | CRIP2   | Pericyte/SM |
| 0         | 0.49641336 | 0.803 | 0.469 | 0       | 12 | IGFBP7  | Pericyte/SM |
| 0         | 0.50670543 | 0.715 | 0.427 | 0       | 12 | HSPB1   | Pericyte/SM |
| 0         | 0.41159166 | 0.728 | 0.355 | 0       | 12 | LGALS1  | Pericyte/SM |
| 0         | 0.27467761 | 0.312 | 0.106 | 0       | 12 | ID3     | Pericyte/SM |
| 0         | 0.2669941  | 0.325 | 0.114 | 0       | 12 | TM4SF1  | Pericyte/SM |
| 0         | 0.26624355 | 0.388 | 0.148 | 0       | 12 | MEF2C   | Pericyte/SM |
| 4.93E-265 | 0.33430883 | 0.651 | 0.383 | 1E-260  | 12 | IFITM3  | Pericyte/SM |
| 2.09E-263 | 0.40567899 | 0.734 | 0.537 | 5E-259  | 12 | MYL6    | Pericyte/SM |
| 6.57E-215 | 0.26662424 | 0.616 | 0.358 | 1E-210  | 12 | VIM     | Pericyte/SM |
| 3.05E-196 | 0.28783102 | 0.752 | 0.557 | 7E-192  | 12 | CALM2   | Pericyte/SM |
| 7.077E-85 | 0.29151239 | 0.501 | 0.377 | 1.6E-80 | 12 | JUNB    | Pericyte/SM |
| 3.73E-193 | 0.26140386 | 0.974 | 0.937 | 8E-189  | 12 | PTMA    | Pericyte/SM |
| 5.73E-108 | -0.2891373 | 0.028 | 0.164 | 1E-103  | 12 | FCER1G  | Pericyte/SM |
| 5.58E-78  | -0.3127465 | 0.022 | 0.124 | 1.2E-73 | 12 | CCL3    | Pericyte/SM |
| 1.195E-75 | -0.3176317 | 0.021 | 0.119 | 2.6E-71 | 12 | C1QA    | Pericyte/SM |
| 1.1E-107  | -0.4372999 | 0.025 | 0.159 | 2E-103  | 12 | LYZ     | Pericyte/SM |
| 6.59E-108 | -0.3038116 | 0.042 | 0.184 | 1E-103  | 12 | RGS1    | Pericyte/SM |
| 2.476E-72 | -0.2887262 | 0.034 | 0.136 | 5.5E-68 | 12 | CCL4    | Pericyte/SM |
| 2.347E-74 | -0.2562404 | 0.048 | 0.159 | 5.2E-70 | 12 | CCL5    | Pericyte/SM |
| 1.86E-121 | -0.3484309 | 0.045 | 0.201 | 4E-117  | 12 | AIF1    | Pericyte/SM |
| 4.54E-117 | -0.3447408 | 0.049 | 0.2   | 1E-112  | 12 | TYROBP  | Pericyte/SM |
| 3.719E-67 | -0.282815  | 0.048 | 0.15  | 8.2E-63 | 12 | CXCL2   | Pericyte/SM |

|           |            |       |       |         |    |          |             |
|-----------|------------|-------|-------|---------|----|----------|-------------|
| 6.71E-119 | -0.2885194 | 0.085 | 0.252 | 1E-114  | 12 | CXCR4    | Pericyte/SM |
| 3.448E-51 | -0.2526085 | 0.075 | 0.167 | 7.6E-47 | 12 | CXCL14   | Pericyte/SM |
| 4.03E-162 | -0.2765148 | 0.163 | 0.384 | 9E-158  | 12 | S100A10  | Pericyte/SM |
| 4.48E-263 | -0.4247443 | 0.109 | 0.39  | 1E-258  | 12 | CYBA     | Pericyte/SM |
| 1.566E-46 | -0.2595207 | 0.075 | 0.162 | 3.5E-42 | 12 | MMP7     | Pericyte/SM |
| 2.762E-77 | -0.2889895 | 0.113 | 0.239 | 6.1E-73 | 12 | HLA-DPB1 | Pericyte/SM |
| 2.21E-149 | -0.3477289 | 0.138 | 0.338 | 5E-145  | 12 | CTSD     | Pericyte/SM |
| 4.79E-115 | -0.3023761 | 0.151 | 0.32  | 1E-110  | 12 | NPC2     | Pericyte/SM |
| 7.475E-70 | -0.2549278 | 0.178 | 0.303 | 1.7E-65 | 12 | NFKBIA   | Pericyte/SM |
| 5.74E-158 | -0.3653849 | 0.144 | 0.351 | 1E-153  | 12 | CD24     | Pericyte/SM |
| 1.756E-81 | -0.2641452 | 0.201 | 0.342 | 3.9E-77 | 12 | PSAP     | Pericyte/SM |
| 7.701E-51 | -0.3332751 | 0.098 | 0.192 | 1.7E-46 | 12 | APOE     | Pericyte/SM |
| 1.647E-71 | -0.4548432 | 0.067 | 0.179 | 3.6E-67 | 12 | S100A2   | Pericyte/SM |
| 5.34E-103 | -0.2557082 | 0.363 | 0.529 | 1.2E-98 | 12 | HLA-B    | Pericyte/SM |
| 1.11E-162 | -0.3524466 | 0.224 | 0.439 | 2E-158  | 12 | KLF6     | Pericyte/SM |
| 1.82E-126 | -0.4035328 | 0.151 | 0.329 | 4E-122  | 12 | FXD2     | Pericyte/SM |
| 3.785E-77 | -0.3373228 | 0.207 | 0.334 | 8.4E-73 | 12 | SRGN     | Pericyte/SM |
| 1.514E-50 | -0.2701612 | 0.426 | 0.521 | 3.3E-46 | 12 | DUSP1    | Pericyte/SM |
| 1.52E-112 | -0.2826706 | 0.573 | 0.697 | 3E-108  | 12 | RPS26    | Pericyte/SM |
| 3.11E-117 | -0.2766721 | 0.716 | 0.805 | 7E-113  | 12 | TPT1     | Pericyte/SM |
| 9.961E-88 | -0.2573071 | 0.861 | 0.895 | 2.2E-83 | 12 | RPS19    | Pericyte/SM |
| 9.91E-142 | -0.6246948 | 0.124 | 0.31  | 2E-137  | 12 | DEFB1    | Pericyte/SM |
| 4.26E-101 | -0.2906178 | 0.804 | 0.862 | 9.4E-97 | 12 | NEAT1    | Pericyte/SM |
| 2.33E-125 | -0.4590141 | 0.283 | 0.467 | 5E-121  | 12 | CD74     | Pericyte/SM |
| 1.114E-34 | -0.2910084 | 0.962 | 0.95  | 2.5E-30 | 12 | B2M      | Pericyte/SM |
| 7.056E-47 | -0.2948342 | 0.904 | 0.886 | 1.6E-42 | 12 | TMSB4X   | Pericyte/SM |
| 6.576E-87 | -0.5692453 | 0.16  | 0.298 | 1.5E-82 | 12 | WFDC2    | Pericyte/SM |
| 1.63E-272 | -0.5778411 | 0.316 | 0.584 | 4E-268  | 12 | SAT1     | Pericyte/SM |
| 3.6E-251  | -0.3948152 | 0.643 | 0.807 | 8E-247  | 12 | RPL28    | Pericyte/SM |
| 7.77E-114 | -0.5760063 | 0.217 | 0.387 | 2E-109  | 12 | ATP1B1   | Pericyte/SM |
| 6.96E-290 | -0.3909535 | 0.823 | 0.931 | 2E-285  | 12 | RPS29    | Pericyte/SM |
| 1.06E-174 | -0.7782617 | 0.172 | 0.383 | 2E-170  | 12 | HLA-DRA  | Pericyte/SM |
| 0         | -0.5305457 | 0.689 | 0.865 | 0       | 12 | TMSB10   | Pericyte/SM |
| 9.04E-114 | -2.0399367 | 0.039 | 0.186 | 2E-109  | 12 | IGKC     | Pericyte/SM |
| 6.07E-284 | -0.4613957 | 0.887 | 0.943 | 1E-279  | 12 | RPL39    | Pericyte/SM |
| 0.0042925 | -0.5771644 | 0.23  | 0.241 | 1       | 12 | MT1G     | Pericyte/SM |
| 1.664E-79 | -0.9352043 | 0.261 | 0.385 | 3.7E-75 | 12 | SPP1     | Pericyte/SM |
| 1.25E-129 | -0.8130556 | 0.708 | 0.79  | 3E-125  | 12 | FTL      | Pericyte/SM |
| 0         | 0.59017259 | 0.359 | 0.014 | 0       | 13 | SLC12A3  | DCT         |
| 0         | 1.32214684 | 0.75  | 0.089 | 0       | 13 | TMEM52B  | DCT         |
| 0         | 0.57390857 | 0.501 | 0.044 | 0       | 13 | KNG1     | DCT         |
| 0         | 1.48575337 | 0.969 | 0.361 | 0       | 13 | ATP1B1   | DCT         |
| 0         | 1.03557034 | 0.902 | 0.283 | 0       | 13 | DEFB1    | DCT         |
| 0         | 0.34503792 | 0.31  | 0.044 | 0       | 13 | SFRP1    | DCT         |
| 0         | 0.59298197 | 0.568 | 0.141 | 0       | 13 | WNK1     | DCT         |
| 0         | 0.43792875 | 0.478 | 0.116 | 0       | 13 | CA12     | DCT         |
| 0         | 0.44875837 | 0.522 | 0.141 | 0       | 13 | KCNJ16   | DCT         |
| 0         | 0.66405021 | 0.758 | 0.307 | 0       | 13 | FXD2     | DCT         |

|           |            |       |       |         |    |          |     |
|-----------|------------|-------|-------|---------|----|----------|-----|
| 0         | 0.33798357 | 0.357 | 0.079 | 0       | 13 | HSD11B2  | DCT |
| 0         | 0.35638317 | 0.423 | 0.123 | 0       | 13 | MAL      | DCT |
| 0         | 0.30029058 | 0.322 | 0.092 | 0       | 13 | ACSL4    | DCT |
| 2.36E-262 | 0.33831833 | 0.269 | 0.095 | 5E-258  | 13 | SLC12A1  | DCT |
| 0         | 0.30996377 | 0.367 | 0.135 | 0       | 13 | PCSK1N   | DCT |
| 0         | 0.36389101 | 0.565 | 0.249 | 0       | 13 | ATP1A1   | DCT |
| 0         | 0.27075857 | 0.358 | 0.12  | 0       | 13 | NUDT4    | DCT |
| 2.93E-289 | 0.26656798 | 0.291 | 0.102 | 6E-285  | 13 | GDF15    | DCT |
| 0         | 0.27080212 | 0.406 | 0.146 | 0       | 13 | CDH16    | DCT |
| 2.96E-268 | 0.28036574 | 0.304 | 0.114 | 7E-264  | 13 | KRT19    | DCT |
| 0         | 0.34171792 | 0.679 | 0.332 | 0       | 13 | CD24     | DCT |
| 4.33E-284 | 0.29445549 | 0.372 | 0.158 | 1E-279  | 13 | NFE2L2   | DCT |
| 1.71E-302 | 0.2847632  | 0.418 | 0.178 | 4E-298  | 13 | EMX2     | DCT |
| 6.42E-250 | 0.33215201 | 0.657 | 0.415 | 1E-245  | 13 | DSTN     | DCT |
| 0         | 0.43618429 | 0.96  | 0.799 | 0       | 13 | MT-ND4L  | DCT |
| 4.04E-158 | 0.28257072 | 0.431 | 0.239 | 9E-154  | 13 | HES1     | DCT |
| 1.22E-216 | 0.29272203 | 0.538 | 0.319 | 3E-212  | 13 | WSB1     | DCT |
| 5.31E-184 | 0.26647646 | 0.555 | 0.348 | 1E-179  | 13 | COX5B    | DCT |
| 6.59E-120 | 0.26599839 | 0.545 | 0.384 | 1E-115  | 13 | HNRNPH1  | DCT |
| 7.16E-188 | 0.2796203  | 0.746 | 0.561 | 2E-183  | 13 | ATP5I    | DCT |
| 0         | 0.3508404  | 0.999 | 0.963 | 0       | 13 | MT-ND1   | DCT |
| 0         | 0.35281354 | 1     | 1     | 0       | 13 | MT-CO3   | DCT |
| 1.14E-185 | 0.27522701 | 0.803 | 0.632 | 3E-181  | 13 | COX7C    | DCT |
| 1.8E-266  | 0.3328506  | 1     | 0.999 | 4E-262  | 13 | MT-ND3   | DCT |
| 9.63E-228 | 0.30194505 | 0.984 | 0.923 | 2E-223  | 13 | MT-ND5   | DCT |
| 6.31E-191 | 0.29284365 | 0.999 | 0.995 | 1E-186  | 13 | MT-ND2   | DCT |
| 1.485E-78 | -0.2547626 | 0.007 | 0.102 | 3.3E-74 | 13 | C1QB     | DCT |
| 1.847E-95 | -0.3389168 | 0.007 | 0.12  | 4.1E-91 | 13 | C1QA     | DCT |
| 3.49E-125 | -0.3087295 | 0.017 | 0.164 | 8E-121  | 13 | FCER1G   | DCT |
| 6.816E-96 | -0.3176957 | 0.017 | 0.136 | 1.5E-91 | 13 | CCL4     | DCT |
| 6.54E-114 | -0.308687  | 0.021 | 0.16  | 1E-109  | 13 | CCL5     | DCT |
| 1.99E-131 | -0.2708896 | 0.028 | 0.187 | 4E-127  | 13 | CD52     | DCT |
| 5.763E-86 | -0.3322383 | 0.016 | 0.124 | 1.3E-81 | 13 | CCL3     | DCT |
| 3.21E-152 | -0.3858846 | 0.025 | 0.201 | 7E-148  | 13 | TYROBP   | DCT |
| 6.87E-121 | -0.3254448 | 0.033 | 0.184 | 2E-116  | 13 | RGS1     | DCT |
| 7.78E-144 | -0.3821923 | 0.031 | 0.201 | 2E-139  | 13 | AIF1     | DCT |
| 1.87E-111 | -0.280714  | 0.041 | 0.185 | 4E-107  | 13 | SPARC    | DCT |
| 1.26E-137 | -0.3082576 | 0.044 | 0.215 | 3E-133  | 13 | HLA-DPA1 | DCT |
| 4.28E-104 | -0.2718416 | 0.043 | 0.182 | 9E-100  | 13 | IFI27    | DCT |
| 2.65E-105 | -0.4470419 | 0.026 | 0.159 | 6E-101  | 13 | LYZ      | DCT |
| 1.27E-127 | -0.2824449 | 0.06  | 0.228 | 3E-123  | 13 | HLA-DRB1 | DCT |
| 5.1E-160  | -0.4299536 | 0.041 | 0.232 | 1E-155  | 13 | TIMP1    | DCT |
| 3.42E-159 | -0.3229242 | 0.065 | 0.263 | 8E-155  | 13 | IL32     | DCT |
| 7.78E-153 | -0.3739435 | 0.053 | 0.241 | 2E-148  | 13 | HLA-DPB1 | DCT |
| 8.18E-283 | -0.5367337 | 0.052 | 0.339 | 2E-278  | 13 | SRGN     | DCT |
| 1.567E-73 | -0.3094898 | 0.043 | 0.15  | 3.5E-69 | 13 | CXCL2    | DCT |
| 4.15E-143 | -0.3241309 | 0.069 | 0.252 | 9E-139  | 13 | CXCR4    | DCT |
| 3.74E-307 | -0.5117434 | 0.071 | 0.377 | 8E-303  | 13 | VIM      | DCT |

|           |            |       |       |         |    |         |     |
|-----------|------------|-------|-------|---------|----|---------|-----|
| 1.57E-54  | -0.3028651 | 0.053 | 0.141 | 3.5E-50 | 13 | CTGF    | DCT |
| 1.056E-49 | -0.2888536 | 0.056 | 0.139 | 2.3E-45 | 13 | SPARCL1 | DCT |
| 4.353E-76 | -0.3728616 | 0.054 | 0.167 | 9.6E-72 | 13 | MGP     | DCT |
| 2.7E-126  | -0.2792022 | 0.141 | 0.325 | 6E-122  | 13 | GPX1    | DCT |
| 1.17E-165 | -0.3245266 | 0.131 | 0.343 | 3E-161  | 13 | SH3BGR1 | DCT |
| 5.39E-139 | -0.3301447 | 0.117 | 0.305 | 1E-134  | 13 | NFKBIA  | DCT |
| 5.37E-111 | -0.2530504 | 0.23  | 0.403 | 1E-106  | 13 | MYL12A  | DCT |
| 1.93E-202 | -0.3891739 | 0.149 | 0.388 | 4E-198  | 13 | CYBA    | DCT |
| 1.7E-78   | -0.2678945 | 0.184 | 0.319 | 3.8E-74 | 13 | NPC2    | DCT |
| 8.04E-146 | -0.264488  | 0.305 | 0.511 | 2E-141  | 13 | EEF1D   | DCT |
| 2.944E-82 | -0.2523192 | 0.257 | 0.401 | 6.5E-78 | 13 | BTG1    | DCT |
| 4.17E-132 | -0.2829497 | 0.271 | 0.463 | 9E-128  | 13 | HLA-A   | DCT |
| 1.45E-109 | -0.2993521 | 0.215 | 0.386 | 3E-105  | 13 | ZFP36   | DCT |
| 2.47E-129 | -0.2564108 | 0.365 | 0.555 | 5E-125  | 13 | RPL27   | DCT |
| 7.22E-151 | -2.1603932 | 0.015 | 0.187 | 2E-146  | 13 | IGKC    | DCT |
| 7.38E-140 | -0.2967288 | 0.286 | 0.482 | 2E-135  | 13 | PFN1    | DCT |
| 7.57E-121 | -0.2511959 | 0.417 | 0.594 | 2E-116  | 13 | RPL18   | DCT |
| 8.06E-164 | -0.3941361 | 0.189 | 0.399 | 2E-159  | 13 | IFITM3  | DCT |
| 8.42E-151 | -0.2827253 | 0.423 | 0.62  | 2E-146  | 13 | UBA52   | DCT |
| 2.5E-128  | -0.320915  | 0.289 | 0.471 | 6E-124  | 13 | PABPC1  | DCT |
| 1.91E-125 | -0.2557974 | 0.544 | 0.698 | 4E-121  | 13 | RPL9    | DCT |
| 3.95E-117 | -0.2552357 | 0.542 | 0.69  | 9E-113  | 13 | RPL15   | DCT |
| 2.495E-33 | -0.3253116 | 0.119 | 0.192 | 5.5E-29 | 13 | APOE    | DCT |
| 3.87E-192 | -0.3172697 | 0.399 | 0.623 | 9E-188  | 13 | RPS16   | DCT |
| 3.26E-253 | -0.4248737 | 0.26  | 0.532 | 7E-249  | 13 | HLA-B   | DCT |
| 9.39E-165 | -0.2999146 | 0.471 | 0.66  | 2E-160  | 13 | RPS9    | DCT |
| 2.04E-123 | -0.2972294 | 0.479 | 0.642 | 5E-119  | 13 | H3F3B   | DCT |
| 2.06E-117 | -0.2651842 | 0.638 | 0.756 | 5E-113  | 13 | RPS24   | DCT |
| 1.32E-147 | -0.2907508 | 0.548 | 0.707 | 3E-143  | 13 | RPL19   | DCT |
| 7.92E-130 | -0.2549584 | 0.762 | 0.86  | 2E-125  | 13 | RPL36   | DCT |
| 9.31E-133 | -0.2568276 | 0.743 | 0.842 | 2E-128  | 13 | RPL35   | DCT |
| 3.04E-107 | -0.2652488 | 0.633 | 0.737 | 7E-103  | 13 | RPL3    | DCT |
| 1.01E-129 | -0.2885428 | 0.632 | 0.759 | 2E-125  | 13 | RPL7    | DCT |
| 2.13E-129 | -0.2770625 | 0.699 | 0.804 | 5E-125  | 13 | RPL11   | DCT |
| 2.08E-149 | -0.3103661 | 0.566 | 0.72  | 5E-145  | 13 | RPS4X   | DCT |
| 1.07E-149 | -0.2996145 | 0.622 | 0.761 | 2E-145  | 13 | RPL35A  | DCT |
| 7E-163    | -0.5552925 | 0.169 | 0.374 | 2E-158  | 13 | LGALS1  | DCT |
| 6.749E-84 | -0.337421  | 0.389 | 0.523 | 1.5E-79 | 13 | DUSP1   | DCT |
| 2.66E-199 | -0.3441889 | 0.525 | 0.717 | 6E-195  | 13 | RPS13   | DCT |
| 1.557E-13 | -0.3335836 | 0.124 | 0.164 | 3.4E-09 | 13 | IGFBP5  | DCT |
| 1.78E-182 | -0.3544397 | 0.471 | 0.661 | 4E-178  | 13 | RPS3    | DCT |
| 0         | -0.7382703 | 0.163 | 0.471 | 0       | 13 | CD74    | DCT |
| 1.03E-262 | -0.9023621 | 0.11  | 0.385 | 2E-258  | 13 | HLA-DRA | DCT |
| 5.31E-140 | -0.2673833 | 0.91  | 0.94  | 1E-135  | 13 | PTMA    | DCT |
| 1.82E-201 | -0.3658614 | 0.496 | 0.7   | 4E-197  | 13 | RPS26   | DCT |
| 1.43E-152 | -0.2850851 | 0.803 | 0.883 | 3E-148  | 13 | RPS14   | DCT |
| 1.94E-145 | -0.2938072 | 0.745 | 0.84  | 4E-141  | 13 | RPL26   | DCT |
| 5.87E-215 | -0.3609157 | 0.55  | 0.742 | 1E-210  | 13 | RPL27A  | DCT |

|           |            |       |       |         |    |          |           |
|-----------|------------|-------|-------|---------|----|----------|-----------|
| 2.58E-142 | -0.3051084 | 0.77  | 0.853 | 6E-138  | 13 | RPS6     | DCT       |
| 3.233E-52 | -0.3100403 | 0.613 | 0.686 | 7.1E-48 | 13 | FOS      | DCT       |
| 1.14E-193 | -0.3444419 | 0.674 | 0.815 | 3E-189  | 13 | RPL12    | DCT       |
| 7.51E-204 | -0.3774183 | 0.591 | 0.762 | 2E-199  | 13 | RPS3A    | DCT       |
| 1.63E-221 | -0.335596  | 0.853 | 0.92  | 4E-217  | 13 | RPS27A   | DCT       |
| 7.43E-300 | -0.4809951 | 0.462 | 0.71  | 2E-295  | 13 | RPS2     | DCT       |
| 1.61E-239 | -0.3536943 | 0.802 | 0.898 | 4E-235  | 13 | RPS15    | DCT       |
| 1.62E-176 | -0.3535209 | 0.774 | 0.862 | 4E-172  | 13 | RPS8     | DCT       |
| 2.05E-235 | -0.3750894 | 0.739 | 0.862 | 5E-231  | 13 | RPS12    | DCT       |
| 8.73E-286 | -0.4278106 | 0.62  | 0.809 | 2E-281  | 13 | TPT1     | DCT       |
| 4.535E-21 | -0.411918  | 0.222 | 0.278 | 1E-16   | 13 | MT1X     | DCT       |
| 0         | -0.4967899 | 0.517 | 0.761 | 0       | 13 | RPL18A   | DCT       |
| 0         | -0.447317  | 0.655 | 0.838 | 0       | 13 | RPLP2    | DCT       |
| 0         | -0.4534495 | 0.627 | 0.807 | 0       | 13 | RPL28    | DCT       |
| 3.24E-253 | -0.3742228 | 0.962 | 0.98  | 7E-249  | 13 | RPL34    | DCT       |
| 3.15E-302 | -0.4279907 | 0.797 | 0.906 | 7E-298  | 13 | RPL32    | DCT       |
| 0         | -0.4785824 | 0.653 | 0.83  | 0       | 13 | RPS15A   | DCT       |
| 5.97E-152 | -0.424179  | 0.743 | 0.835 | 1E-147  | 13 | ACTB     | DCT       |
| 3.42E-267 | -0.4317171 | 0.851 | 0.926 | 8E-263  | 13 | RPS18    | DCT       |
| 0         | -0.4360099 | 0.888 | 0.95  | 0       | 13 | RPL21    | DCT       |
| 0         | -0.473263  | 0.81  | 0.917 | 0       | 13 | RPL13A   | DCT       |
| 3.27E-139 | -0.4636616 | 0.732 | 0.803 | 7E-135  | 13 | FTH1     | DCT       |
| 0         | -0.4957987 | 0.811 | 0.926 | 0       | 13 | RPLP1    | DCT       |
| 0         | -0.4992676 | 0.804 | 0.924 | 0       | 13 | RPL13    | DCT       |
| 0         | -0.5157508 | 0.787 | 0.898 | 0       | 13 | RPS19    | DCT       |
| 0         | -0.4885369 | 0.941 | 0.971 | 0       | 13 | RPS27    | DCT       |
| 0         | -0.5398133 | 0.875 | 0.943 | 0       | 13 | RPL39    | DCT       |
| 0         | -0.5958049 | 0.801 | 0.918 | 0       | 13 | RPL10    | DCT       |
| 0         | -0.7279549 | 0.714 | 0.864 | 0       | 13 | TMSB10   | DCT       |
| 1.932E-79 | -0.4462852 | 0.4   | 0.235 | 4.3E-75 | 13 | MT1G     | DCT       |
| 4.09E-181 | -0.9258976 | 0.683 | 0.791 | 9E-177  | 13 | FTL      | DCT       |
| 0         | -1.1873102 | 0.704 | 0.893 | 0       | 13 | TMSB4X   | DCT       |
| 0         | -1.1936103 | 0.855 | 0.953 | 0       | 13 | B2M      | DCT       |
| 0         | 1.1968616  | 0.726 | 0.007 | 0       | 14 | NPHS2    | Podocytes |
| 0         | 0.79695559 | 0.621 | 0.004 | 0       | 14 | RP11-550 | Podocytes |
| 0         | 0.90432924 | 0.695 | 0.009 | 0       | 14 | FGF1     | Podocytes |
| 0         | 1.12880823 | 0.79  | 0.014 | 0       | 14 | CLIC5    | Podocytes |
| 0         | 1.93543633 | 0.903 | 0.029 | 0       | 14 | PTGDS    | Podocytes |
| 0         | 0.43367342 | 0.411 | 0.003 | 0       | 14 | NDNF     | Podocytes |
| 0         | 0.65147632 | 0.535 | 0.006 | 0       | 14 | PCOLCE2  | Podocytes |
| 0         | 1.11757854 | 0.759 | 0.015 | 0       | 14 | DCN      | Podocytes |
| 0         | 0.7600763  | 0.661 | 0.009 | 0       | 14 | PLA2R1   | Podocytes |
| 0         | 0.85272824 | 0.693 | 0.011 | 0       | 14 | PTPRO    | Podocytes |
| 0         | 0.99491032 | 0.749 | 0.014 | 0       | 14 | MME      | Podocytes |
| 0         | 0.45426509 | 0.447 | 0.004 | 0       | 14 | WT1      | Podocytes |
| 0         | 0.63458428 | 0.543 | 0.008 | 0       | 14 | TNNT2    | Podocytes |
| 0         | 0.29767413 | 0.285 | 0.002 | 0       | 14 | NTNG1    | Podocytes |
| 0         | 0.82135021 | 0.633 | 0.013 | 0       | 14 | SPOCK1   | Podocytes |

|   |            |       |       |   |    |          |           |
|---|------------|-------|-------|---|----|----------|-----------|
| 0 | 0.26649793 | 0.251 | 0.002 | 0 | 14 | CFAP45   | Podocytes |
| 0 | 0.25144305 | 0.258 | 0.002 | 0 | 14 | NPHS1    | Podocytes |
| 0 | 1.71691331 | 0.94  | 0.051 | 0 | 14 | PODXL    | Podocytes |
| 0 | 0.2512984  | 0.231 | 0.002 | 0 | 14 | PTPRQ    | Podocytes |
| 0 | 0.61817949 | 0.51  | 0.011 | 0 | 14 | TPPP3    | Podocytes |
| 0 | 0.3321221  | 0.322 | 0.004 | 0 | 14 | TCF21    | Podocytes |
| 0 | 1.23076673 | 0.837 | 0.039 | 0 | 14 | HTRA1    | Podocytes |
| 0 | 0.36900644 | 0.363 | 0.006 | 0 | 14 | C14orf37 | Podocytes |
| 0 | 0.62523561 | 0.467 | 0.014 | 0 | 14 | APOD     | Podocytes |
| 0 | 0.94831587 | 0.724 | 0.035 | 0 | 14 | NPNT     | Podocytes |
| 0 | 0.38887883 | 0.373 | 0.008 | 0 | 14 | F3       | Podocytes |
| 0 | 0.64991327 | 0.564 | 0.022 | 0 | 14 | ENPEP    | Podocytes |
| 0 | 0.36787744 | 0.348 | 0.008 | 0 | 14 | GAS1     | Podocytes |
| 0 | 0.46932344 | 0.434 | 0.014 | 0 | 14 | TMEM150  | Podocytes |
| 0 | 0.59136591 | 0.552 | 0.023 | 0 | 14 | SPOCK2   | Podocytes |
| 0 | 0.98840921 | 0.701 | 0.051 | 0 | 14 | IGFBP2   | Podocytes |
| 0 | 0.30384637 | 0.311 | 0.007 | 0 | 14 | NFASC    | Podocytes |
| 0 | 0.46144701 | 0.431 | 0.015 | 0 | 14 | ALS2CL   | Podocytes |
| 0 | 0.64602738 | 0.592 | 0.033 | 0 | 14 | ZDHHC6   | Podocytes |
| 0 | 0.261332   | 0.258 | 0.006 | 0 | 14 | ST6GALN4 | Podocytes |
| 0 | 0.44693211 | 0.443 | 0.018 | 0 | 14 | NEBL     | Podocytes |
| 0 | 0.4730451  | 0.459 | 0.022 | 0 | 14 | SEMA5A   | Podocytes |
| 0 | 0.87059819 | 0.665 | 0.06  | 0 | 14 | VEGFA    | Podocytes |
| 0 | 0.54829022 | 0.541 | 0.033 | 0 | 14 | COL4A3   | Podocytes |
| 0 | 0.62163055 | 0.574 | 0.042 | 0 | 14 | TGFBR3   | Podocytes |
| 0 | 0.72222239 | 0.574 | 0.05  | 0 | 14 | CDKN1C   | Podocytes |
| 0 | 0.33199573 | 0.341 | 0.014 | 0 | 14 | DACH1    | Podocytes |
| 0 | 0.2793637  | 0.289 | 0.01  | 0 | 14 | SULF1    | Podocytes |
| 0 | 0.25915297 | 0.246 | 0.008 | 0 | 14 | RAMP1    | Podocytes |
| 0 | 0.46346761 | 0.462 | 0.027 | 0 | 14 | SYNPO    | Podocytes |
| 0 | 0.42682842 | 0.427 | 0.024 | 0 | 14 | PDLIM2   | Podocytes |
| 0 | 0.42666871 | 0.42  | 0.024 | 0 | 14 | SBSPON   | Podocytes |
| 0 | 1.16770278 | 0.767 | 0.121 | 0 | 14 | CTGF     | Podocytes |
| 0 | 0.44149909 | 0.436 | 0.028 | 0 | 14 | NES      | Podocytes |
| 0 | 0.87346295 | 0.764 | 0.103 | 0 | 14 | MYL9     | Podocytes |
| 0 | 0.65686048 | 0.62  | 0.065 | 0 | 14 | TJP1     | Podocytes |
| 0 | 0.2684009  | 0.249 | 0.011 | 0 | 14 | IGF1     | Podocytes |
| 0 | 0.35376447 | 0.359 | 0.021 | 0 | 14 | GMDS     | Podocytes |
| 0 | 0.32391665 | 0.298 | 0.016 | 0 | 14 | CLDN11   | Podocytes |
| 0 | 0.94964869 | 0.776 | 0.127 | 0 | 14 | CRIM1    | Podocytes |
| 0 | 0.51951959 | 0.491 | 0.044 | 0 | 14 | CDC42EP  | Podocytes |
| 0 | 0.25602481 | 0.262 | 0.012 | 0 | 14 | SNCA     | Podocytes |
| 0 | 0.35356209 | 0.373 | 0.027 | 0 | 14 | FOXC1    | Podocytes |
| 0 | 0.41533313 | 0.436 | 0.038 | 0 | 14 | THSD7A   | Podocytes |
| 0 | 1.4039637  | 0.52  | 0.154 | 0 | 14 | CXCL14   | Podocytes |
| 0 | 0.67884276 | 0.592 | 0.086 | 0 | 14 | GOLIM4   | Podocytes |
| 0 | 0.2997616  | 0.32  | 0.021 | 0 | 14 | MPP5     | Podocytes |
| 0 | 0.34741303 | 0.365 | 0.028 | 0 | 14 | EPB41L5  | Podocytes |

|           |            |       |       |         |    |          |           |
|-----------|------------|-------|-------|---------|----|----------|-----------|
| 0         | 0.42207515 | 0.436 | 0.043 | 0       | 14 | IQGAP2   | Podocytes |
| 0         | 0.25671814 | 0.28  | 0.017 | 0       | 14 | PTPRD    | Podocytes |
| 0         | 0.53829843 | 0.541 | 0.071 | 0       | 14 | RARRES2  | Podocytes |
| 0         | 0.31047287 | 0.33  | 0.025 | 0       | 14 | F2R      | Podocytes |
| 0         | 0.29063334 | 0.312 | 0.023 | 0       | 14 | FRY      | Podocytes |
| 0         | 0.48770055 | 0.498 | 0.062 | 0       | 14 | UACA     | Podocytes |
| 0         | 0.89075231 | 0.774 | 0.179 | 0       | 14 | AIF1     | Podocytes |
| 0         | 0.68230344 | 0.61  | 0.117 | 0       | 14 | BST2     | Podocytes |
| 0         | 0.32965713 | 0.353 | 0.036 | 0       | 14 | SRGAP2C  | Podocytes |
| 0         | 0.25252699 | 0.277 | 0.023 | 0       | 14 | TMEM98   | Podocytes |
| 0         | 0.41998745 | 0.424 | 0.061 | 0       | 14 | TPM2     | Podocytes |
| 0         | 0.26895075 | 0.299 | 0.028 | 0       | 14 | ARHGEF3  | Podocytes |
| 0         | 0.25236014 | 0.281 | 0.026 | 0       | 14 | SEMA3B   | Podocytes |
| 0         | 0.58006092 | 0.609 | 0.13  | 0       | 14 | BCAM     | Podocytes |
| 0         | 0.54951098 | 0.609 | 0.145 | 0       | 14 | MYH9     | Podocytes |
| 0         | 0.2919048  | 0.315 | 0.04  | 0       | 14 | NQO1     | Podocytes |
| 0         | 0.48221542 | 0.57  | 0.125 | 0       | 14 | ACTN4    | Podocytes |
| 2.28E-279 | 0.99433942 | 0.478 | 0.219 | 5E-275  | 14 | TIMP1    | Podocytes |
| 0         | 0.29390462 | 0.327 | 0.045 | 0       | 14 | NDRG2    | Podocytes |
| 0         | 0.39445063 | 0.441 | 0.09  | 0       | 14 | NUPR1    | Podocytes |
| 0         | 0.34707836 | 0.42  | 0.077 | 0       | 14 | DST      | Podocytes |
| 0         | 0.3220514  | 0.38  | 0.066 | 0       | 14 | SEPT11   | Podocytes |
| 0         | 0.51394597 | 0.592 | 0.165 | 0       | 14 | VAMP5    | Podocytes |
| 0         | 0.2680502  | 0.316 | 0.046 | 0       | 14 | PALLD    | Podocytes |
| 0         | 0.29423605 | 0.35  | 0.056 | 0       | 14 | FAM134B  | Podocytes |
| 0         | 0.58915768 | 0.662 | 0.224 | 0       | 14 | ANXA2    | Podocytes |
| 0         | 0.31122251 | 0.348 | 0.063 | 0       | 14 | ITGB8    | Podocytes |
| 0         | 0.26537056 | 0.31  | 0.048 | 0       | 14 | PRKCI    | Podocytes |
| 0         | 0.30546013 | 0.358 | 0.066 | 0       | 14 | SLC9A3R2 | Podocytes |
| 0         | 0.27968153 | 0.338 | 0.06  | 0       | 14 | PHACTR4  | Podocytes |
| 0         | 0.26429212 | 0.304 | 0.051 | 0       | 14 | ITGA3    | Podocytes |
| 0         | 0.3736814  | 0.458 | 0.109 | 0       | 14 | HIPK2    | Podocytes |
| 0         | 0.44435539 | 0.59  | 0.169 | 0       | 14 | SPARC    | Podocytes |
| 0         | 0.35470788 | 0.453 | 0.107 | 0       | 14 | RDX      | Podocytes |
| 0         | 0.32674106 | 0.375 | 0.084 | 0       | 14 | ITGAV    | Podocytes |
| 0         | 0.28855437 | 0.359 | 0.072 | 0       | 14 | PTH1R    | Podocytes |
| 0         | 0.98286494 | 0.958 | 0.655 | 0       | 14 | ITM2B    | Podocytes |
| 0         | 0.30273164 | 0.382 | 0.089 | 0       | 14 | CAPN2    | Podocytes |
| 0         | 0.31099684 | 0.423 | 0.102 | 0       | 14 | MAFB     | Podocytes |
| 0         | 0.79791104 | 0.892 | 0.554 | 0       | 14 | CALM2    | Podocytes |
| 0         | 0.25945298 | 0.316 | 0.064 | 0       | 14 | MAL2     | Podocytes |
| 0         | 0.28122534 | 0.365 | 0.081 | 0       | 14 | ARHGEF1  | Podocytes |
| 0         | 0.29124622 | 0.384 | 0.092 | 0       | 14 | TIMP2    | Podocytes |
| 0         | 0.25574785 | 0.331 | 0.07  | 0       | 14 | PAM      | Podocytes |
| 0         | 0.36158683 | 0.499 | 0.151 | 0       | 14 | CD81     | Podocytes |
| 0         | 0.85874633 | 0.97  | 0.699 | 0       | 14 | S100A6   | Podocytes |
| 2.994E-65 | 0.6353872  | 0.263 | 0.16  | 6.6E-61 | 14 | IGFBP5   | Podocytes |
| 0         | 0.54236418 | 0.787 | 0.413 | 0       | 14 | DSTN     | Podocytes |

|           |            |       |       |         |    |         |           |
|-----------|------------|-------|-------|---------|----|---------|-----------|
| 0         | 0.29422502 | 0.391 | 0.113 | 0       | 14 | CD151   | Podocytes |
| 0         | 0.48536763 | 0.724 | 0.358 | 0       | 14 | LGALS1  | Podocytes |
| 0         | 0.31276312 | 0.534 | 0.172 | 0       | 14 | CALD1   | Podocytes |
| 0         | 0.26424325 | 0.36  | 0.1   | 0       | 14 | EIF3M   | Podocytes |
| 0         | 0.51525163 | 0.838 | 0.47  | 0       | 14 | IGFBP7  | Podocytes |
| 0         | 0.34616481 | 0.503 | 0.192 | 0       | 14 | VAMP2   | Podocytes |
| 0         | 0.3756144  | 0.538 | 0.233 | 0       | 14 | HMGN3   | Podocytes |
| 0         | 0.28075625 | 0.394 | 0.132 | 0       | 14 | LEPROT  | Podocytes |
| 1.39E-300 | 0.32137834 | 0.428 | 0.167 | 3E-296  | 14 | TIMP3   | Podocytes |
| 0         | 0.42898602 | 0.72  | 0.383 | 0       | 14 | IFITM3  | Podocytes |
| 0         | 0.25516846 | 0.371 | 0.12  | 0       | 14 | SPATS2L | Podocytes |
| 0         | 0.35134144 | 0.585 | 0.277 | 0       | 14 | NGFRAP1 | Podocytes |
| 0         | 0.31899536 | 0.555 | 0.244 | 0       | 14 | ITGB1   | Podocytes |
| 0         | 0.60926327 | 0.995 | 0.884 | 0       | 14 | TMSB4X  | Podocytes |
| 1.04E-254 | 0.3749943  | 0.657 | 0.402 | 2E-250  | 14 | DYNLL1  | Podocytes |
| 5.867E-87 | 0.25392704 | 0.194 | 0.091 | 1.3E-82 | 14 | EMCN    | Podocytes |
| 5.43E-227 | 0.25490668 | 0.486 | 0.233 | 1E-222  | 14 | WBP5    | Podocytes |
| 6.67E-194 | 0.29179145 | 0.532 | 0.301 | 1E-189  | 14 | HSP90B1 | Podocytes |
| 6.61E-233 | 0.31757485 | 0.696 | 0.438 | 1E-228  | 14 | TCEB2   | Podocytes |
| 3.49E-126 | 0.29847593 | 0.497 | 0.295 | 8E-122  | 14 | S100A4  | Podocytes |
| 7.95E-186 | 0.28752739 | 0.661 | 0.429 | 2E-181  | 14 | SKP1    | Podocytes |
| 3.27E-105 | 0.29194943 | 0.546 | 0.372 | 7E-101  | 14 | S100A10 | Podocytes |
| 6.99E-165 | 0.25125701 | 0.62  | 0.386 | 2E-160  | 14 | SEC62   | Podocytes |
| 1.865E-65 | 0.26783251 | 0.649 | 0.52  | 4.1E-61 | 14 | HLA-B   | Podocytes |
| 6.403E-66 | -0.2666225 | 0.046 | 0.162 | 1.4E-61 | 14 | FCER1G  | Podocytes |
| 9.266E-54 | -0.2734501 | 0.047 | 0.149 | 2E-49   | 14 | CXCL2   | Podocytes |
| 4.188E-43 | -0.2792245 | 0.04  | 0.123 | 9.3E-39 | 14 | CCL3    | Podocytes |
| 2.215E-51 | -0.2685228 | 0.058 | 0.161 | 4.9E-47 | 14 | MMP7    | Podocytes |
| 7.859E-60 | -0.2643331 | 0.067 | 0.182 | 1.7E-55 | 14 | RGS1    | Podocytes |
| 1.082E-77 | -0.3266279 | 0.063 | 0.199 | 2.4E-73 | 14 | TYROBP  | Podocytes |
| 3.9E-31   | -0.2691553 | 0.05  | 0.118 | 8.6E-27 | 14 | C1QA    | Podocytes |
| 7.79E-127 | -0.3032087 | 0.125 | 0.331 | 2E-122  | 14 | DNAJB1  | Podocytes |
| 6.5E-180  | -0.4284196 | 0.098 | 0.35  | 1E-175  | 14 | CD24    | Podocytes |
| 1.22E-98  | -0.2778869 | 0.146 | 0.324 | 2.7E-94 | 14 | GPX1    | Podocytes |
| 2.904E-58 | -0.396154  | 0.05  | 0.158 | 6.4E-54 | 14 | LYZ     | Podocytes |
| 5.849E-64 | -0.4437723 | 0.059 | 0.179 | 1.3E-59 | 14 | S100A2  | Podocytes |
| 1.144E-93 | -0.2765484 | 0.221 | 0.401 | 2.5E-89 | 14 | BTG1    | Podocytes |
| 2.12E-106 | -0.421727  | 0.11  | 0.297 | 5E-102  | 14 | CLU     | Podocytes |
| 4.71E-187 | -0.4108688 | 0.171 | 0.439 | 1E-182  | 14 | KLF6    | Podocytes |
| 4.61E-114 | -0.3984883 | 0.134 | 0.328 | 1E-109  | 14 | FXYP2   | Podocytes |
| 7.068E-98 | -0.3075386 | 0.206 | 0.385 | 1.6E-93 | 14 | ZFP36   | Podocytes |
| 2.3E-131  | -0.4342213 | 0.13  | 0.335 | 5E-127  | 14 | SRGN    | Podocytes |
| 3.45E-107 | -0.2558855 | 0.362 | 0.548 | 8E-103  | 14 | UQCRB   | Podocytes |
| 1.899E-60 | -0.2650519 | 0.257 | 0.384 | 4.2E-56 | 14 | CYBA    | Podocytes |
| 2.37E-147 | -0.6477018 | 0.089 | 0.31  | 5E-143  | 14 | DEFB1   | Podocytes |
| 1.22E-115 | -0.3286415 | 0.275 | 0.47  | 3E-111  | 14 | PABPC1  | Podocytes |
| 1.44E-186 | -0.4373636 | 0.228 | 0.494 | 3E-182  | 14 | HSPA1B  | Podocytes |
| 5.71E-116 | -0.279782  | 0.509 | 0.677 | 1E-111  | 14 | RPL31   | Podocytes |

|           |            |       |       |         |    |         |           |
|-----------|------------|-------|-------|---------|----|---------|-----------|
| 4.4E-113  | -0.5894027 | 0.107 | 0.298 | 1E-108  | 14 | WFDC2   | Podocytes |
| 9.918E-93 | -0.2551678 | 0.583 | 0.701 | 2.2E-88 | 14 | RPS17   | Podocytes |
| 9.66E-102 | -0.3224799 | 0.348 | 0.527 | 2.1E-97 | 14 | JUN     | Podocytes |
| 2.161E-91 | -0.2708421 | 0.523 | 0.658 | 4.8E-87 | 14 | RPS3    | Podocytes |
| 3.9E-121  | -0.2816726 | 0.533 | 0.682 | 9E-117  | 14 | RPL8    | Podocytes |
| 2.07E-164 | -0.4529831 | 0.231 | 0.473 | 5E-160  | 14 | HSPA1A  | Podocytes |
| 2.628E-88 | -0.3616814 | 0.28  | 0.441 | 5.8E-84 | 14 | HSPB1   | Podocytes |
| 1.07E-107 | -0.2837214 | 0.582 | 0.714 | 2E-103  | 14 | RPS13   | Podocytes |
| 4.06E-133 | -0.3067723 | 0.499 | 0.658 | 9E-129  | 14 | RPS9    | Podocytes |
| 3.2E-109  | -0.2569591 | 0.766 | 0.841 | 7E-105  | 14 | RPL35   | Podocytes |
| 6.344E-97 | -0.2800501 | 0.602 | 0.718 | 1.4E-92 | 14 | RPS4X   | Podocytes |
| 1.687E-97 | -0.2806487 | 0.663 | 0.757 | 3.7E-93 | 14 | RPL7    | Podocytes |
| 2.04E-124 | -0.3011653 | 0.614 | 0.739 | 5E-120  | 14 | RPL27A  | Podocytes |
| 2.974E-97 | -0.2998595 | 0.588 | 0.696 | 6.6E-93 | 14 | RPS26   | Podocytes |
| 5.24E-113 | -0.2860327 | 0.773 | 0.852 | 1E-108  | 14 | RPS6    | Podocytes |
| 1.01E-103 | -0.2766019 | 0.807 | 0.859 | 2E-99   | 14 | RPS12   | Podocytes |
| 6.72E-133 | -0.2639713 | 0.953 | 0.967 | 1E-128  | 14 | RPL41   | Podocytes |
| 3.519E-33 | -0.3205719 | 0.377 | 0.463 | 7.8E-29 | 14 | CD74    | Podocytes |
| 7.79E-100 | -0.2815843 | 0.799 | 0.861 | 1.7E-95 | 14 | RPS8    | Podocytes |
| 9.49E-105 | -0.3941681 | 0.353 | 0.523 | 2E-100  | 14 | DUSP1   | Podocytes |
| 1.1E-119  | -0.2746693 | 0.869 | 0.896 | 2E-115  | 14 | RPS15   | Podocytes |
| 6.33E-98  | -0.2699209 | 0.946 | 0.948 | 1.4E-93 | 14 | RPL21   | Podocytes |
| 1.421E-87 | -0.2753839 | 1     | 1     | 3.1E-83 | 14 | MT-CO3  | Podocytes |
| 6.84E-119 | -0.3205507 | 0.655 | 0.759 | 2E-114  | 14 | RPS3A   | Podocytes |
| 1.19E-169 | -0.3197448 | 0.752 | 0.86  | 3E-165  | 14 | RPL36   | Podocytes |
| 2.04E-146 | -0.2980632 | 0.873 | 0.929 | 5E-142  | 14 | RPS29   | Podocytes |
| 1.88E-143 | -0.3631293 | 0.548 | 0.706 | 4E-139  | 14 | RPS2    | Podocytes |
| 5.05E-188 | -0.3414527 | 0.69  | 0.833 | 1E-183  | 14 | RPS23   | Podocytes |
| 6.84E-147 | -0.3318295 | 0.725 | 0.835 | 2E-142  | 14 | RPLP2   | Podocytes |
| 2.278E-54 | -0.2827076 | 0.884 | 0.858 | 5E-50   | 14 | TMSB10  | Podocytes |
| 1.13E-223 | -0.4021815 | 0.552 | 0.757 | 3E-219  | 14 | RPS24   | Podocytes |
| 2.535E-95 | -0.3017532 | 0.895 | 0.915 | 5.6E-91 | 14 | RPL10   | Podocytes |
| 3.66E-153 | -0.3663627 | 0.623 | 0.756 | 8E-149  | 14 | RPL18A  | Podocytes |
| 1.48E-188 | -0.3712637 | 0.665 | 0.814 | 3E-184  | 14 | RPL12   | Podocytes |
| 2.12E-103 | -0.3096656 | 0.992 | 0.995 | 5E-99   | 14 | MT-ND2  | Podocytes |
| 1.09E-121 | -0.3135691 | 0.956 | 0.97  | 2E-117  | 14 | RPS27   | Podocytes |
| 8.27E-150 | -0.3263967 | 0.869 | 0.914 | 2E-145  | 14 | RPL13A  | Podocytes |
| 6.77E-154 | -0.3164519 | 0.965 | 0.98  | 1E-149  | 14 | RPL34   | Podocytes |
| 7.12E-200 | -0.5531812 | 0.33  | 0.581 | 2E-195  | 14 | SAT1    | Podocytes |
| 1.53E-169 | -0.3466588 | 0.835 | 0.904 | 3E-165  | 14 | RPL32   | Podocytes |
| 3.95E-214 | -0.3935926 | 0.691 | 0.841 | 9E-210  | 14 | RPL26   | Podocytes |
| 9.92E-155 | -0.4084687 | 0.573 | 0.714 | 2E-150  | 14 | HSP90AA | Podocytes |
| 6.12E-101 | -0.3349026 | 0.947 | 0.964 | 1.4E-96 | 14 | MT-ND1  | Podocytes |
| 7.03E-177 | -0.3820498 | 0.717 | 0.827 | 2E-172  | 14 | RPS15A  | Podocytes |
| 3.59E-243 | -0.4327757 | 0.62  | 0.806 | 8E-239  | 14 | RPL28   | Podocytes |
| 1.53E-213 | -0.4097279 | 0.659 | 0.806 | 3E-209  | 14 | TPT1    | Podocytes |
| 2.42E-193 | -0.38758   | 0.846 | 0.926 | 5E-189  | 14 | RPS18   | Podocytes |
| 6.42E-224 | -0.3910699 | 0.858 | 0.924 | 1E-219  | 14 | RPLP1   | Podocytes |

|           |            |       |       |         |    |         |           |
|-----------|------------|-------|-------|---------|----|---------|-----------|
| 1.29E-158 | -0.366236  | 1     | 1     | 3E-154  | 14 | MT-CO1  | Podocytes |
| 1.091E-96 | -0.438575  | 0.573 | 0.686 | 2.4E-92 | 14 | FOS     | Podocytes |
| 3.67E-158 | -0.9812673 | 0.147 | 0.387 | 8E-154  | 14 | SPP1    | Podocytes |
| 7.29E-236 | -0.4036072 | 0.854 | 0.922 | 2E-231  | 14 | RPL13   | Podocytes |
| 1.14E-274 | -0.4739534 | 0.764 | 0.898 | 3E-270  | 14 | RPS19   | Podocytes |
| 4.526E-45 | -0.5543252 | 0.282 | 0.379 | 1E-40   | 14 | HLA-DRA | Podocytes |
| 4.975E-32 | -0.5401393 | 0.328 | 0.383 | 1.1E-27 | 14 | ATP1B1  | Podocytes |
| 1.71E-299 | -0.5198196 | 0.875 | 0.943 | 4E-295  | 14 | RPL39   | Podocytes |
| 8.972E-67 | -0.6971252 | 0.747 | 0.789 | 2E-62   | 14 | FTL     | Podocytes |
| 6.478E-24 | -1.8814534 | 0.113 | 0.183 | 1.4E-19 | 14 | IGKC    | Podocytes |
| 0         | 1.39230844 | 0.729 | 0.043 | 0       | 15 | CALB1   | CNT       |
| 0         | 0.48636884 | 0.219 | 0.009 | 0       | 15 | KLK1    | CNT       |
| 0         | 1.02505035 | 0.459 | 0.055 | 0       | 15 | STC1    | CNT       |
| 0         | 1.71745676 | 0.919 | 0.287 | 0       | 15 | DEFB1   | CNT       |
| 0         | 0.65454044 | 0.535 | 0.066 | 0       | 15 | SLC8A1  | CNT       |
| 0         | 0.49783621 | 0.492 | 0.078 | 0       | 15 | HSD11B2 | CNT       |
| 0         | 1.19985867 | 0.935 | 0.367 | 0       | 15 | ATP1B1  | CNT       |
| 0         | 0.50032405 | 0.54  | 0.1   | 0       | 15 | TMEM52B | CNT       |
| 0         | 0.35500744 | 0.352 | 0.069 | 0       | 15 | AQP2    | CNT       |
| 0         | 0.42882137 | 0.541 | 0.145 | 0       | 15 | CDH16   | CNT       |
| 0         | 0.33850525 | 0.381 | 0.085 | 0       | 15 | CA2     | CNT       |
| 0         | 0.39953704 | 0.479 | 0.146 | 0       | 15 | WNK1    | CNT       |
| 0         | 0.53018553 | 0.688 | 0.313 | 0       | 15 | FXD2    | CNT       |
| 0         | 0.30266836 | 0.406 | 0.124 | 0       | 15 | CAMK2N1 | CNT       |
| 0         | 0.33800479 | 0.462 | 0.168 | 0       | 15 | S100A2  | CNT       |
| 4.01E-295 | 0.28577599 | 0.319 | 0.102 | 9E-291  | 15 | GDF15   | CNT       |
| 0         | 0.35525067 | 0.634 | 0.284 | 0       | 15 | WFDC2   | CNT       |
| 8.05E-289 | 0.25329574 | 0.353 | 0.122 | 2E-284  | 15 | CA12    | CNT       |
| 7.82E-308 | 0.4073955  | 0.691 | 0.391 | 2E-303  | 15 | COX7B   | CNT       |
| 2.93E-283 | 0.28007143 | 0.411 | 0.163 | 6E-279  | 15 | COX20   | CNT       |
| 5.22E-207 | 0.38248337 | 0.632 | 0.374 | 1E-202  | 15 | SPP1    | CNT       |
| 3.19E-262 | 0.2505462  | 0.409 | 0.165 | 7E-258  | 15 | CHCHD10 | CNT       |
| 0         | 0.50039003 | 0.98  | 0.8   | 0       | 15 | MT-ND4L | CNT       |
| 4.29E-207 | 0.30975406 | 0.51  | 0.272 | 9E-203  | 15 | MRPL33  | CNT       |
| 2.33E-178 | 0.26160943 | 0.352 | 0.16  | 5E-174  | 15 | NFE2L2  | CNT       |
| 2.59E-243 | 0.39608863 | 0.753 | 0.528 | 6E-239  | 15 | NDUFA4  | CNT       |
| 3.05E-119 | 0.31918349 | 0.424 | 0.241 | 7E-115  | 15 | HES1    | CNT       |
| 6.19E-202 | 0.31298334 | 0.592 | 0.348 | 1E-197  | 15 | COX5B   | CNT       |
| 6.48E-212 | 0.32836379 | 0.671 | 0.424 | 1E-207  | 15 | UQCRCQ  | CNT       |
| 2.1E-182  | 0.25969336 | 0.478 | 0.247 | 5E-178  | 15 | MT-ATP8 | CNT       |
| 3.4E-199  | 0.29708017 | 0.642 | 0.388 | 8E-195  | 15 | NDUFA1  | CNT       |
| 1.62E-201 | 0.25921253 | 0.635 | 0.336 | 4E-197  | 15 | CD24    | CNT       |
| 1.48E-217 | 0.35276078 | 0.773 | 0.561 | 3E-213  | 15 | ATP5I   | CNT       |
| 0         | 0.45284455 | 0.999 | 0.963 | 0       | 15 | MT-ND1  | CNT       |
| 4.71E-148 | 0.25405938 | 0.493 | 0.286 | 1E-143  | 15 | COX8A   | CNT       |
| 0         | 0.39586765 | 0.994 | 0.923 | 0       | 15 | MT-ND5  | CNT       |
| 3.09E-196 | 0.3250107  | 0.824 | 0.633 | 7E-192  | 15 | COX7C   | CNT       |
| 2.72E-147 | 0.28405865 | 0.63  | 0.429 | 6E-143  | 15 | COX6B1  | CNT       |

|           |            |       |       |         |    |          |     |
|-----------|------------|-------|-------|---------|----|----------|-----|
| 0         | 0.40510762 | 1     | 1     | 0       | 15 | MT-CO3   | CNT |
| 0         | 0.37759251 | 1     | 1     | 0       | 15 | MT-CO1   | CNT |
| 2.4E-294  | 0.30822557 | 1     | 0.999 | 5E-290  | 15 | MT-ND4   | CNT |
| 0         | 0.30165227 | 1     | 1     | 0       | 15 | MT-CO2   | CNT |
| 7.69E-176 | 0.25338273 | 1     | 0.999 | 2E-171  | 15 | MT-ND3   | CNT |
| 1.607E-79 | -0.3426007 | 0.006 | 0.124 | 3.5E-75 | 15 | CCL3     | CNT |
| 4.374E-61 | -0.2520164 | 0.007 | 0.101 | 9.7E-57 | 15 | C1QB     | CNT |
| 4.9E-105  | -0.3128137 | 0.01  | 0.163 | 1E-100  | 15 | FCER1G   | CNT |
| 1.41E-82  | -0.3245624 | 0.011 | 0.136 | 3.1E-78 | 15 | CCL4     | CNT |
| 1.082E-70 | -0.3326513 | 0.01  | 0.119 | 2.4E-66 | 15 | C1QA     | CNT |
| 2.225E-90 | -0.3078281 | 0.019 | 0.159 | 4.9E-86 | 15 | CCL5     | CNT |
| 1.03E-107 | -0.3307776 | 0.021 | 0.183 | 2E-103  | 15 | RGS1     | CNT |
| 3.05E-101 | -0.2667245 | 0.029 | 0.186 | 6.7E-97 | 15 | CD52     | CNT |
| 5.365E-94 | -0.4542093 | 0.016 | 0.159 | 1.2E-89 | 15 | LYZ      | CNT |
| 2.77E-116 | -0.3821152 | 0.027 | 0.2   | 6E-112  | 15 | TYROBP   | CNT |
| 1.82E-113 | -0.3777663 | 0.029 | 0.2   | 4E-109  | 15 | AIF1     | CNT |
| 1.09E-235 | -0.5490128 | 0.04  | 0.337 | 2E-231  | 15 | SRGN     | CNT |
| 8.376E-79 | -0.2620686 | 0.047 | 0.184 | 1.9E-74 | 15 | SPARC    | CNT |
| 7.22E-133 | -0.3452993 | 0.051 | 0.251 | 2E-128  | 15 | CXCR4    | CNT |
| 1.89E-119 | -0.250576  | 0.079 | 0.275 | 4E-115  | 15 | TSC22D3  | CNT |
| 6.29E-99  | -0.2996401 | 0.052 | 0.214 | 1.4E-94 | 15 | HLA-DPA1 | CNT |
| 5.746E-69 | -0.2547893 | 0.054 | 0.18  | 1.3E-64 | 15 | IFI27    | CNT |
| 3.37E-127 | -0.3250657 | 0.063 | 0.261 | 7E-123  | 15 | IL32     | CNT |
| 5.31E-255 | -0.5165725 | 0.057 | 0.375 | 1E-250  | 15 | VIM      | CNT |
| 2.64E-52  | -0.2930543 | 0.041 | 0.139 | 5.8E-48 | 15 | SPARCL1  | CNT |
| 3.037E-83 | -0.2641085 | 0.075 | 0.227 | 6.7E-79 | 15 | HLA-DRB1 | CNT |
| 6.77E-112 | -0.36502   | 0.06  | 0.24  | 1E-107  | 15 | HLA-DPB1 | CNT |
| 3.29E-104 | -0.3940447 | 0.058 | 0.23  | 7E-100  | 15 | TIMP1    | CNT |
| 7.596E-45 | -0.2906253 | 0.049 | 0.141 | 1.7E-40 | 15 | CTGF     | CNT |
| 2.467E-46 | -0.2841608 | 0.055 | 0.149 | 5.5E-42 | 15 | CXCL2    | CNT |
| 1.15E-133 | -0.3521186 | 0.093 | 0.304 | 3E-129  | 15 | NFKBIA   | CNT |
| 1.04E-119 | -0.3120911 | 0.14  | 0.341 | 2E-115  | 15 | SH3BGR1  | CNT |
| 8.022E-75 | -0.2567378 | 0.17  | 0.323 | 1.8E-70 | 15 | GPX1     | CNT |
| 1.053E-96 | -0.3349975 | 0.13  | 0.305 | 2.3E-92 | 15 | S100A4   | CNT |
| 3.902E-92 | -0.2586927 | 0.226 | 0.402 | 8.6E-88 | 15 | MYL12A   | CNT |
| 8.33E-164 | -0.3934769 | 0.144 | 0.387 | 2E-159  | 15 | CYBA     | CNT |
| 3.99E-120 | -2.1491376 | 0.013 | 0.185 | 9E-116  | 15 | IGKC     | CNT |
| 2.13E-83  | -0.2784846 | 0.234 | 0.4   | 4.7E-79 | 15 | BTG1     | CNT |
| 1.27E-117 | -0.2740311 | 0.304 | 0.509 | 3E-113  | 15 | EEF1D    | CNT |
| 2.63E-104 | -0.2867275 | 0.272 | 0.461 | 6E-100  | 15 | HLA-A    | CNT |
| 2.092E-89 | -0.3067738 | 0.213 | 0.385 | 4.6E-85 | 15 | ZFP36    | CNT |
| 2.41E-106 | -0.2781766 | 0.357 | 0.54  | 5E-102  | 15 | RPL30    | CNT |
| 1.12E-143 | -0.3423248 | 0.26  | 0.481 | 2E-139  | 15 | PFN1     | CNT |
| 1.58E-190 | -0.6228017 | 0.112 | 0.374 | 3E-186  | 15 | LGALS1   | CNT |
| 2.209E-89 | -0.2501894 | 0.465 | 0.618 | 4.9E-85 | 15 | UBA52    | CNT |
| 4.738E-67 | -0.2952027 | 0.255 | 0.396 | 1E-62   | 15 | IFITM3   | CNT |
| 1.71E-105 | -0.2785778 | 0.421 | 0.595 | 4E-101  | 15 | RPS5     | CNT |
| 2.97E-112 | -0.3371096 | 0.277 | 0.47  | 7E-108  | 15 | PABPC1   | CNT |

|           |            |       |       |         |    |         |     |
|-----------|------------|-------|-------|---------|----|---------|-----|
| 6.005E-95 | -0.2508743 | 0.558 | 0.696 | 1.3E-90 | 15 | RPL9    | CNT |
| 5.03E-200 | -0.4227212 | 0.256 | 0.53  | 1E-195  | 15 | HLA-B   | CNT |
| 1.501E-85 | -0.2522604 | 0.583 | 0.705 | 3.3E-81 | 15 | RPL19   | CNT |
| 7.862E-19 | -0.3021913 | 0.133 | 0.191 | 1.7E-14 | 15 | APOE    | CNT |
| 1.12E-142 | -0.3167759 | 0.418 | 0.621 | 2E-138  | 15 | RPS16   | CNT |
| 3.958E-80 | -0.3379128 | 0.279 | 0.432 | 8.7E-76 | 15 | CST3    | CNT |
| 1.149E-87 | -0.2743684 | 0.559 | 0.697 | 2.5E-83 | 15 | RPS26   | CNT |
| 0.0002204 | -0.25582   | 0.146 | 0.164 | 1       | 15 | MGP     | CNT |
| 3.065E-86 | -0.2663202 | 0.66  | 0.757 | 6.8E-82 | 15 | RPL7    | CNT |
| 5.32E-107 | -0.2819093 | 0.622 | 0.755 | 1E-102  | 15 | RPS24   | CNT |
| 2.29E-105 | -0.2821876 | 0.626 | 0.76  | 5E-101  | 15 | RPL35A  | CNT |
| 1.61E-133 | -0.3459427 | 0.451 | 0.642 | 4E-129  | 15 | H3F3B   | CNT |
| 1.78E-121 | -0.2818155 | 0.735 | 0.842 | 4E-117  | 15 | RPL35   | CNT |
| 2.24E-123 | -0.3029751 | 0.646 | 0.776 | 5E-119  | 15 | RPL23A  | CNT |
| 5.88E-117 | -0.2944385 | 0.688 | 0.803 | 1E-112  | 15 | RPL11   | CNT |
| 9.833E-66 | -0.3378471 | 0.392 | 0.522 | 2.2E-61 | 15 | DUSP1   | CNT |
| 3.38E-107 | -0.2885773 | 0.716 | 0.813 | 7E-103  | 15 | RPL12   | CNT |
| 3.79E-149 | -0.3595953 | 0.469 | 0.659 | 8E-145  | 15 | RPS3    | CNT |
| 5.39E-127 | -0.2872334 | 0.789 | 0.883 | 1E-122  | 15 | RPS14   | CNT |
| 1.125E-98 | -0.2846385 | 0.778 | 0.852 | 2.5E-94 | 15 | RPS6    | CNT |
| 5.87E-109 | -0.2896786 | 0.753 | 0.839 | 1E-104  | 15 | RPL26   | CNT |
| 8.33E-178 | -0.3694187 | 0.512 | 0.716 | 2E-173  | 15 | RPS13   | CNT |
| 7.061E-59 | -0.4992626 | 0.152 | 0.279 | 1.6E-54 | 15 | MT1X    | CNT |
| 2.25E-179 | -0.3757975 | 0.556 | 0.741 | 5E-175  | 15 | RPL27A  | CNT |
| 1.807E-44 | -0.449322  | 0.196 | 0.305 | 4E-40   | 15 | ADIRF   | CNT |
| 1.42E-143 | -0.3301829 | 0.767 | 0.86  | 3E-139  | 15 | RPS12   | CNT |
| 6.38E-183 | -0.8773036 | 0.132 | 0.383 | 1E-178  | 15 | HLA-DRA | CNT |
| 2.7E-166  | -0.3257507 | 0.886 | 0.94  | 6E-162  | 15 | PTMA    | CNT |
| 1.588E-71 | -0.3758867 | 0.563 | 0.686 | 3.5E-67 | 15 | FOS     | CNT |
| 2.65E-179 | -0.3459399 | 0.814 | 0.897 | 6E-175  | 15 | RPS15   | CNT |
| 3.45E-192 | -0.4148425 | 0.579 | 0.761 | 8E-188  | 15 | RPS3A   | CNT |
| 2.65E-73  | -0.350498  | 0.779 | 0.834 | 5.9E-69 | 15 | ACTB    | CNT |
| 3.55E-166 | -0.3799069 | 0.758 | 0.862 | 8E-162  | 15 | RPS8    | CNT |
| 2.76E-206 | -0.4127307 | 0.652 | 0.805 | 6E-202  | 15 | RPL28   | CNT |
| 1.32E-207 | -0.4623303 | 0.512 | 0.706 | 3E-203  | 15 | RPS2    | CNT |
| 1.08E-214 | -0.3746204 | 0.834 | 0.92  | 2E-210  | 15 | RPS27A  | CNT |
| 1.57E-229 | -0.4364744 | 0.63  | 0.807 | 3E-225  | 15 | TPT1    | CNT |
| 1.55E-143 | -0.6152429 | 0.259 | 0.466 | 3E-139  | 15 | CD74    | CNT |
| 4.72E-218 | -0.4181942 | 0.687 | 0.836 | 1E-213  | 15 | RPLP2   | CNT |
| 2.05E-271 | -0.498029  | 0.528 | 0.759 | 5E-267  | 15 | RPL18A  | CNT |
| 2.79E-197 | -0.3921539 | 0.823 | 0.905 | 6E-193  | 15 | RPL32   | CNT |
| 4.81E-174 | -0.3952582 | 0.867 | 0.925 | 1E-169  | 15 | RPS18   | CNT |
| 1.57E-260 | -0.4885319 | 0.65  | 0.828 | 3E-256  | 15 | RPS15A  | CNT |
| 1.85E-238 | -0.4088259 | 0.95  | 0.98  | 4E-234  | 15 | RPL34   | CNT |
| 5.81E-283 | -0.4643092 | 0.805 | 0.916 | 1E-278  | 15 | RPL13A  | CNT |
| 5.04E-244 | -0.4385647 | 0.888 | 0.949 | 1E-239  | 15 | RPL21   | CNT |
| 2.71E-297 | -0.4726363 | 0.829 | 0.924 | 6E-293  | 15 | RPLP1   | CNT |
| 1.324E-96 | -0.6172744 | 0.355 | 0.516 | 2.9E-92 | 15 | MT2A    | CNT |

|           |            |       |       |        |    |          |                       |
|-----------|------------|-------|-------|--------|----|----------|-----------------------|
| 1.87E-213 | -0.4391641 | 0.947 | 0.971 | 4E-209 | 15 | RPS27    | CNT                   |
| 0         | -0.4977384 | 0.815 | 0.923 | 0      | 15 | RPL13    | CNT                   |
| 1.36E-211 | -0.4718814 | 0.896 | 0.942 | 3E-207 | 15 | RPL39    | CNT                   |
| 1.97E-187 | -0.5509901 | 0.675 | 0.804 | 4E-183 | 15 | FTH1     | CNT                   |
| 0         | -0.5625269 | 0.745 | 0.898 | 0      | 15 | RPS19    | CNT                   |
| 0         | -0.5930843 | 0.781 | 0.918 | 0      | 15 | RPL10    | CNT                   |
| 0         | -0.8823506 | 0.591 | 0.866 | 0      | 15 | TMSB10   | CNT                   |
| 1.96E-176 | -0.9535168 | 0.647 | 0.791 | 4E-172 | 15 | FTL      | CNT                   |
| 0         | -0.939252  | 0.823 | 0.889 | 0      | 15 | TMSB4X   | CNT                   |
| 0         | -1.2103597 | 0.834 | 0.953 | 0      | 15 | B2M      | CNT                   |
| 0         | 1.78622339 | 0.759 | 0.082 | 0      | 16 | MT1H     | Proximal tubule cells |
| 0         | 2.82232991 | 0.966 | 0.221 | 0      | 16 | MT1G     | Proximal tubule cells |
| 0         | 1.52400794 | 0.798 | 0.113 | 0      | 16 | MT1F     | Proximal tubule cells |
| 0         | 0.98352309 | 0.51  | 0.062 | 0      | 16 | MT1M     | Proximal tubule cells |
| 0         | 2.0182794  | 0.905 | 0.259 | 0      | 16 | MT1X     | Proximal tubule cells |
| 0         | 1.66685251 | 0.901 | 0.219 | 0      | 16 | MT1E     | Proximal tubule cells |
| 0         | 0.57215083 | 0.541 | 0.05  | 0      | 16 | ACSM2A   | Proximal tubule cells |
| 0         | 0.32408566 | 0.18  | 0.011 | 0      | 16 | REG1A    | Proximal tubule cells |
| 0         | 0.41308732 | 0.398 | 0.033 | 0      | 16 | ACSM2B   | Proximal tubule cells |
| 0         | 0.74905039 | 0.608 | 0.113 | 0      | 16 | PIGR     | Proximal tubule cells |
| 0         | 0.96880206 | 0.785 | 0.201 | 0      | 16 | CRYAB    | Proximal tubule cells |
| 0         | 1.65948907 | 0.964 | 0.5   | 0      | 16 | MT2A     | Proximal tubule cells |
| 0         | 0.35930147 | 0.337 | 0.038 | 0      | 16 | NAT8     | Proximal tubule cells |
| 0         | 0.58894281 | 0.556 | 0.109 | 0      | 16 | PDZK1IP1 | Proximal tubule cells |
| 0         | 1.02183499 | 0.756 | 0.28  | 0      | 16 | CLU      | Proximal tubule cells |
| 0         | 0.36478928 | 0.377 | 0.053 | 0      | 16 | LGALS2   | Proximal tubule cells |
| 0         | 0.41741232 | 0.461 | 0.077 | 0      | 16 | UGT2B7   | Proximal tubule cells |
| 0         | 0.65691861 | 0.56  | 0.148 | 0      | 16 | MMP7     | Proximal tubule cells |
| 0         | 0.40873217 | 0.43  | 0.074 | 0      | 16 | VCAM1    | Proximal tubule cells |
| 0         | 0.41124418 | 0.445 | 0.09  | 0      | 16 | MGST1    | Proximal tubule cells |
| 0         | 0.27230182 | 0.298 | 0.044 | 0      | 16 | RBP5     | Proximal tubule cells |
| 0         | 0.47187164 | 0.549 | 0.154 | 0      | 16 | CXCL14   | Proximal tubule cells |
| 0         | 0.3410962  | 0.417 | 0.093 | 0      | 16 | GATM     | Proximal tubule cells |
| 0         | 0.27909326 | 0.322 | 0.062 | 0      | 16 | AKAP12   | Proximal tubule cells |
| 0         | 0.25922933 | 0.305 | 0.058 | 0      | 16 | FAM134B  | Proximal tubule cells |
| 0         | 0.2899149  | 0.377 | 0.083 | 0      | 16 | TMEM176  | Proximal tubule cells |
| 0         | 0.27105224 | 0.347 | 0.075 | 0      | 16 | LINC0132 | Proximal tubule cells |
| 0         | 0.50309976 | 0.751 | 0.311 | 0      | 16 | FXYD2    | Proximal tubule cells |
| 0         | 0.40940839 | 0.559 | 0.19  | 0      | 16 | GPX3     | Proximal tubule cells |
| 0         | 0.32046001 | 0.392 | 0.107 | 0      | 16 | TNFSF10  | Proximal tubule cells |
| 0         | 0.2812181  | 0.384 | 0.096 | 0      | 16 | TMEM176  | Proximal tubule cells |
| 0         | 0.30872851 | 0.403 | 0.111 | 0      | 16 | TSPAN1   | Proximal tubule cells |
| 0         | 0.34540719 | 0.435 | 0.138 | 0      | 16 | KRT18    | Proximal tubule cells |
| 0         | 0.32078859 | 0.415 | 0.123 | 0      | 16 | SMIM24   | Proximal tubule cells |
| 3.91E-295 | 0.50492318 | 0.6   | 0.294 | 9E-291 | 16 | ADIRF    | Proximal tubule cells |
| 0         | 0.28607215 | 0.407 | 0.119 | 0      | 16 | SPATS2L  | Proximal tubule cells |
| 0         | 0.39788131 | 0.605 | 0.247 | 0      | 16 | IL32     | Proximal tubule cells |
| 0         | 0.34242563 | 0.505 | 0.179 | 0      | 16 | TPM1     | Proximal tubule cells |

|           |            |       |       |         |    |          |                       |
|-----------|------------|-------|-------|---------|----|----------|-----------------------|
| 0         | 0.41411806 | 0.726 | 0.333 | 0       | 16 | CD24     | Proximal tubule cells |
| 0         | 0.28335012 | 0.407 | 0.135 | 0       | 16 | OCIAD2   | Proximal tubule cells |
| 8.21E-214 | 0.27945951 | 0.267 | 0.092 | 2E-209  | 16 | NNMT     | Proximal tubule cells |
| 0         | 0.28949466 | 0.474 | 0.179 | 0       | 16 | EMX2     | Proximal tubule cells |
| 5.25E-276 | 0.32448641 | 0.654 | 0.353 | 1E-271  | 16 | LAPTM4A  | Proximal tubule cells |
| 3.28E-153 | 0.28674561 | 0.599 | 0.374 | 7E-149  | 16 | GSTP1    | Proximal tubule cells |
| 2.59E-176 | 0.25914392 | 0.709 | 0.43  | 6E-172  | 16 | HSPB1    | Proximal tubule cells |
| 6.67E-247 | 0.36575273 | 0.97  | 0.856 | 1E-242  | 16 | TMSB10   | Proximal tubule cells |
| 3.32E-179 | 0.28472092 | 0.862 | 0.658 | 7E-175  | 16 | ITM2B    | Proximal tubule cells |
| 1.19E-222 | 0.30808751 | 0.936 | 0.797 | 3E-218  | 16 | FTH1     | Proximal tubule cells |
| 1.312E-67 | -0.3031685 | 0.022 | 0.135 | 2.9E-63 | 16 | CCL4     | Proximal tubule cells |
| 7.962E-56 | -0.3123025 | 0.022 | 0.119 | 1.8E-51 | 16 | C1QA     | Proximal tubule cells |
| 1.791E-75 | -0.2811201 | 0.035 | 0.163 | 4E-71   | 16 | FCER1G   | Proximal tubule cells |
| 5.308E-82 | -0.2508177 | 0.045 | 0.185 | 1.2E-77 | 16 | CD52     | Proximal tubule cells |
| 2.467E-71 | -0.2833652 | 0.035 | 0.158 | 5.5E-67 | 16 | CCL5     | Proximal tubule cells |
| 1.968E-54 | -0.3041371 | 0.026 | 0.123 | 4.3E-50 | 16 | CCL3     | Proximal tubule cells |
| 4.961E-63 | -0.3124442 | 0.03  | 0.139 | 1.1E-58 | 16 | SPARCL1  | Proximal tubule cells |
| 2.443E-79 | -0.3002298 | 0.045 | 0.183 | 5.4E-75 | 16 | RGS1     | Proximal tubule cells |
| 2.27E-221 | -0.5363657 | 0.049 | 0.337 | 5E-217  | 16 | SRGN     | Proximal tubule cells |
| 1.319E-85 | -0.334382  | 0.052 | 0.199 | 2.9E-81 | 16 | TYROBP   | Proximal tubule cells |
| 9.73E-111 | -0.3203975 | 0.069 | 0.251 | 2E-106  | 16 | CXCR4    | Proximal tubule cells |
| 4.704E-87 | -0.3442321 | 0.051 | 0.199 | 1E-82   | 16 | AIF1     | Proximal tubule cells |
| 7.907E-74 | -0.4253905 | 0.033 | 0.158 | 1.7E-69 | 16 | LYZ      | Proximal tubule cells |
| 2.98E-150 | -0.4099319 | 0.08  | 0.306 | 7E-146  | 16 | S100A4   | Proximal tubule cells |
| 7.429E-32 | -0.2723382 | 0.065 | 0.14  | 1.6E-27 | 16 | CTGF     | Proximal tubule cells |
| 1.32E-102 | -0.2976378 | 0.157 | 0.341 | 2.9E-98 | 16 | SH3BGR1  | Proximal tubule cells |
| 6.284E-51 | -0.2685197 | 0.122 | 0.238 | 1.4E-46 | 16 | HLA-DPB1 | Proximal tubule cells |
| 2.422E-46 | -0.3516842 | 0.067 | 0.166 | 5.4E-42 | 16 | MGP      | Proximal tubule cells |
| 2.8E-62   | -0.2721789 | 0.168 | 0.302 | 6.2E-58 | 16 | NFKBIA   | Proximal tubule cells |
| 1.13E-103 | -0.3078515 | 0.212 | 0.401 | 3E-99   | 16 | BTG1     | Proximal tubule cells |
| 5.603E-65 | -0.2725294 | 0.338 | 0.469 | 1.2E-60 | 16 | PABPC1   | Proximal tubule cells |
| 6.1E-140  | -0.5383403 | 0.149 | 0.373 | 1E-135  | 16 | LGALS1   | Proximal tubule cells |
| 5.33E-22  | -0.3782753 | 0.111 | 0.177 | 1.2E-17 | 16 | S100A2   | Proximal tubule cells |
| 7.532E-11 | -0.316756  | 0.123 | 0.164 | 1.7E-06 | 16 | IGFBP5   | Proximal tubule cells |
| 1.77E-99  | -0.2625389 | 0.995 | 0.999 | 3.9E-95 | 16 | MALAT1   | Proximal tubule cells |
| 3.78E-138 | -0.3623231 | 0.47  | 0.641 | 8E-134  | 16 | H3F3B    | Proximal tubule cells |
| 3.098E-47 | -0.2698696 | 0.946 | 0.941 | 6.8E-43 | 16 | RPL39    | Proximal tubule cells |
| 2.384E-71 | -0.3578172 | 0.397 | 0.521 | 5.3E-67 | 16 | DUSP1    | Proximal tubule cells |
| 3.25E-105 | -2.1402852 | 0.024 | 0.185 | 7E-101  | 16 | IGKC     | Proximal tubule cells |
| 1.519E-17 | -0.3287497 | 0.435 | 0.462 | 3.4E-13 | 16 | CD74     | Proximal tubule cells |
| 6.972E-16 | -0.289655  | 0.871 | 0.785 | 1.5E-11 | 16 | FTL      | Proximal tubule cells |
| 3.345E-27 | -0.4287355 | 0.234 | 0.306 | 7.4E-23 | 16 | DEFB1    | Proximal tubule cells |
| 1.25E-127 | -0.4796215 | 0.406 | 0.579 | 3E-123  | 16 | SAT1     | Proximal tubule cells |
| 9.833E-12 | -0.2574706 | 0.517 | 0.378 | 2.2E-07 | 16 | ATP1B1   | Proximal tubule cells |
| 3.495E-91 | -0.4500038 | 0.574 | 0.686 | 7.7E-87 | 16 | FOS      | Proximal tubule cells |
| 8.52E-99  | -0.7010372 | 0.211 | 0.38  | 1.9E-94 | 16 | HLA-DRA  | Proximal tubule cells |
| 1.42E-110 | -0.4228624 | 0.787 | 0.833 | 3E-106  | 16 | ACTB     | Proximal tubule cells |
| 1.05E-277 | -0.7950925 | 0.847 | 0.888 | 2E-273  | 16 | TMSB4X   | Proximal tubule cells |

|           |            |       |       |        |    |          |                           |
|-----------|------------|-------|-------|--------|----|----------|---------------------------|
| 1.38E-272 | -0.8122505 | 0.949 | 0.95  | 3E-268 | 16 | B2M      | Proximal tubule cells     |
| 0         | 0.55727224 | 0.488 | 0.019 | 0      | 17 | ATP6V1G  | Intercalated cells-Type A |
| 0         | 0.27377776 | 0.281 | 0.01  | 0      | 17 | LINC0118 | Intercalated cells-Type A |
| 0         | 0.40251605 | 0.423 | 0.023 | 0      | 17 | ATP6V0D  | Intercalated cells-Type A |
| 0         | 0.55751645 | 0.556 | 0.048 | 0      | 17 | TMEM213  | Intercalated cells-Type A |
| 0         | 0.28141756 | 0.292 | 0.014 | 0      | 17 | CLNK     | Intercalated cells-Type A |
| 0         | 0.30591343 | 0.296 | 0.016 | 0      | 17 | SLC4A1   | Intercalated cells-Type A |
| 0         | 0.41200457 | 0.369 | 0.027 | 0      | 17 | SLC26A7  | Intercalated cells-Type A |
| 0         | 0.52568773 | 0.526 | 0.081 | 0      | 17 | ADGRF5   | Intercalated cells-Type A |
| 0         | 0.26749731 | 0.3   | 0.034 | 0      | 17 | ATP6V1B  | Intercalated cells-Type A |
| 0         | 0.46256217 | 0.557 | 0.12  | 0      | 17 | SMIM24   | Intercalated cells-Type A |
| 0         | 0.44893537 | 0.555 | 0.117 | 0      | 17 | CA12     | Intercalated cells-Type A |
| 0         | 0.30207541 | 0.36  | 0.053 | 0      | 17 | PTGER3   | Intercalated cells-Type A |
| 0         | 0.27859754 | 0.314 | 0.044 | 0      | 17 | DSG2     | Intercalated cells-Type A |
| 0         | 0.51520704 | 0.591 | 0.154 | 0      | 17 | C12orf75 | Intercalated cells-Type A |
| 0         | 0.45343742 | 0.469 | 0.108 | 0      | 17 | RARRES3  | Intercalated cells-Type A |
| 0         | 0.48098294 | 0.568 | 0.146 | 0      | 17 | ATP6AP2  | Intercalated cells-Type A |
| 0         | 0.25459039 | 0.264 | 0.036 | 0      | 17 | TMEM101  | Intercalated cells-Type A |
| 0         | 0.54505097 | 0.661 | 0.209 | 0      | 17 | ATP6V0B  | Intercalated cells-Type A |
| 0         | 0.36788886 | 0.446 | 0.102 | 0      | 17 | CKB      | Intercalated cells-Type A |
| 0         | 0.61336557 | 0.799 | 0.31  | 0      | 17 | FXD2     | Intercalated cells-Type A |
| 0         | 0.58947587 | 0.75  | 0.294 | 0      | 17 | CD9      | Intercalated cells-Type A |
| 0         | 0.31638466 | 0.419 | 0.113 | 0      | 17 | LGALS3   | Intercalated cells-Type A |
| 0         | 0.49462674 | 0.669 | 0.293 | 0      | 17 | RTN4     | Intercalated cells-Type A |
| 0         | 0.26323884 | 0.342 | 0.081 | 0      | 17 | LINC0096 | Intercalated cells-Type A |
| 0         | 0.28484027 | 0.379 | 0.099 | 0      | 17 | ATP6V1A  | Intercalated cells-Type A |
| 0         | 0.27139913 | 0.533 | 0.154 | 0      | 17 | IGFBP5   | Intercalated cells-Type A |
| 0         | 0.31322783 | 0.471 | 0.163 | 0      | 17 | CHCHD10  | Intercalated cells-Type A |
| 0         | 0.27530903 | 0.41  | 0.127 | 0      | 17 | EPCAM    | Intercalated cells-Type A |
| 0         | 0.45063954 | 0.757 | 0.39  | 0      | 17 | COX7B    | Intercalated cells-Type A |
| 0         | 0.26067212 | 0.399 | 0.125 | 0      | 17 | CAMK2N1  | Intercalated cells-Type A |
| 1.86E-292 | 0.3758331  | 0.641 | 0.295 | 4E-288 | 17 | DEFB1    | Intercalated cells-Type A |
| 6.03E-284 | 0.28641113 | 0.381 | 0.138 | 1E-279 | 17 | COX7A1   | Intercalated cells-Type A |
| 0         | 0.35493568 | 0.577 | 0.259 | 0      | 17 | MIF      | Intercalated cells-Type A |
| 0         | 0.25385953 | 0.37  | 0.12  | 0      | 17 | MSI2     | Intercalated cells-Type A |
| 1.15E-226 | 0.27687644 | 0.322 | 0.118 | 3E-222 | 17 | TACSTD2  | Intercalated cells-Type A |
| 0         | 0.27923444 | 0.445 | 0.167 | 0      | 17 | CYSTM1   | Intercalated cells-Type A |
| 1.45E-307 | 0.30154227 | 0.476 | 0.194 | 3E-303 | 17 | BSG      | Intercalated cells-Type A |
| 0         | 0.36505647 | 0.652 | 0.324 | 0      | 17 | COX6A1   | Intercalated cells-Type A |
| 0         | 0.38845822 | 0.722 | 0.386 | 0      | 17 | NDUFA1   | Intercalated cells-Type A |
| 0         | 0.39594702 | 0.74  | 0.423 | 0      | 17 | UQCRCQ   | Intercalated cells-Type A |
| 0         | 0.38658265 | 0.722 | 0.414 | 0      | 17 | COX6C    | Intercalated cells-Type A |
| 1.38E-248 | 0.27278828 | 0.436 | 0.18  | 3E-244 | 17 | EMX2     | Intercalated cells-Type A |
| 0         | 0.44891184 | 0.895 | 0.631 | 0      | 17 | COX7C    | Intercalated cells-Type A |
| 2.39E-282 | 0.3364026  | 0.655 | 0.347 | 5E-278 | 17 | COX5B    | Intercalated cells-Type A |
| 0         | 0.39958254 | 0.834 | 0.526 | 0      | 17 | NDUFA4   | Intercalated cells-Type A |
| 4.52E-265 | 0.32102449 | 0.607 | 0.313 | 1E-260 | 17 | UQCRC10  | Intercalated cells-Type A |
| 1.44E-257 | 0.36479433 | 0.725 | 0.458 | 3E-253 | 17 | COX4I1   | Intercalated cells-Type A |

|           |            |       |       |         |    |          |                           |
|-----------|------------|-------|-------|---------|----|----------|---------------------------|
| 1.65E-231 | 0.28941755 | 0.558 | 0.285 | 4E-227  | 17 | COX8A    | Intercalated cells-Type A |
| 3.69E-233 | 0.26209202 | 0.494 | 0.231 | 8E-229  | 17 | NDUFB9   | Intercalated cells-Type A |
| 5.87E-244 | 0.35923526 | 0.72  | 0.462 | 1E-239  | 17 | COX7A2   | Intercalated cells-Type A |
| 2.21E-230 | 0.25829011 | 0.502 | 0.236 | 5E-226  | 17 | NDUFC1   | Intercalated cells-Type A |
| 4.47E-225 | 0.29121344 | 0.582 | 0.309 | 1E-220  | 17 | NDUFS5   | Intercalated cells-Type A |
| 9.13E-234 | 0.30993629 | 0.666 | 0.38  | 2E-229  | 17 | NDUFB2   | Intercalated cells-Type A |
| 3.9E-182  | 0.29845384 | 0.658 | 0.412 | 9E-178  | 17 | USMG5    | Intercalated cells-Type A |
| 1.99E-199 | 0.28683375 | 0.691 | 0.428 | 4E-195  | 17 | COX6B1   | Intercalated cells-Type A |
| 3.78E-207 | 0.31526009 | 0.813 | 0.561 | 8E-203  | 17 | ATP5I    | Intercalated cells-Type A |
| 7.13E-178 | 0.27631471 | 0.7   | 0.438 | 2E-173  | 17 | TXNIP    | Intercalated cells-Type A |
| 7.12E-169 | 0.25059024 | 0.561 | 0.321 | 2E-164  | 17 | ATP5J    | Intercalated cells-Type A |
| 5.08E-166 | 0.26843283 | 0.71  | 0.479 | 1E-161  | 17 | ATP5L    | Intercalated cells-Type A |
| 7.8E-170  | 0.27370935 | 0.929 | 0.8   | 2E-165  | 17 | RPL37A   | Intercalated cells-Type A |
| 6.661E-72 | -0.3412599 | 0.009 | 0.124 | 1.5E-67 | 17 | CCL3     | Intercalated cells-Type A |
| 2.054E-89 | -0.3059952 | 0.019 | 0.163 | 4.5E-85 | 17 | FCER1G   | Intercalated cells-Type A |
| 4.271E-62 | -0.3270044 | 0.014 | 0.119 | 9.4E-58 | 17 | C1QA     | Intercalated cells-Type A |
| 1.289E-70 | -0.3124044 | 0.017 | 0.135 | 2.8E-66 | 17 | CCL4     | Intercalated cells-Type A |
| 5.272E-91 | -0.4639816 | 0.015 | 0.158 | 1.2E-86 | 17 | LYZ      | Intercalated cells-Type A |
| 9.24E-114 | -0.3841832 | 0.023 | 0.2   | 2E-109  | 17 | AIF1     | Intercalated cells-Type A |
| 9.093E-94 | -0.3263052 | 0.029 | 0.183 | 2E-89   | 17 | RGS1     | Intercalated cells-Type A |
| 6.591E-89 | -0.285629  | 0.034 | 0.184 | 1.5E-84 | 17 | SPARC    | Intercalated cells-Type A |
| 9E-108    | -0.3780406 | 0.029 | 0.199 | 2E-103  | 17 | TYROBP   | Intercalated cells-Type A |
| 3.18E-262 | -0.5400413 | 0.042 | 0.375 | 7E-258  | 17 | VIM      | Intercalated cells-Type A |
| 1.585E-68 | -0.2856631 | 0.035 | 0.158 | 3.5E-64 | 17 | CCL5     | Intercalated cells-Type A |
| 4.728E-64 | -0.3111403 | 0.033 | 0.149 | 1E-59   | 17 | CXCL2    | Intercalated cells-Type A |
| 6.412E-62 | -0.3308624 | 0.03  | 0.141 | 1.4E-57 | 17 | CTGF     | Intercalated cells-Type A |
| 6.67E-219 | -0.5503515 | 0.045 | 0.337 | 1E-214  | 17 | SRGN     | Intercalated cells-Type A |
| 5.802E-62 | -0.2545515 | 0.058 | 0.18  | 1.3E-57 | 17 | IFI27    | Intercalated cells-Type A |
| 7.984E-97 | -0.3074148 | 0.077 | 0.25  | 1.8E-92 | 17 | CXCR4    | Intercalated cells-Type A |
| 2.2E-103  | -0.4166789 | 0.054 | 0.23  | 5E-99   | 17 | TIMP1    | Intercalated cells-Type A |
| 2.449E-69 | -0.3145081 | 0.097 | 0.238 | 5.4E-65 | 17 | HLA-DPB1 | Intercalated cells-Type A |
| 4.695E-52 | -0.3706411 | 0.059 | 0.166 | 1E-47   | 17 | MGP      | Intercalated cells-Type A |
| 1.722E-97 | -0.294538  | 0.157 | 0.34  | 3.8E-93 | 17 | SH3BGR1  | Intercalated cells-Type A |
| 2.338E-90 | -0.314741  | 0.131 | 0.303 | 5.2E-86 | 17 | NFKBIA   | Intercalated cells-Type A |
| 5.669E-93 | -0.351229  | 0.13  | 0.305 | 1.3E-88 | 17 | S100A4   | Intercalated cells-Type A |
| 7.417E-77 | -0.2520483 | 0.24  | 0.401 | 1.6E-72 | 17 | MYL12A   | Intercalated cells-Type A |
| 2.131E-89 | -0.3157149 | 0.208 | 0.385 | 4.7E-85 | 17 | ZFP36    | Intercalated cells-Type A |
| 1.432E-86 | -0.3116611 | 0.215 | 0.385 | 3.2E-82 | 17 | CYBA     | Intercalated cells-Type A |
| 5.85E-190 | -0.6427405 | 0.104 | 0.374 | 1E-185  | 17 | LGALS1   | Intercalated cells-Type A |
| 5.536E-60 | -0.276152  | 0.342 | 0.468 | 1.2E-55 | 17 | PABPC1   | Intercalated cells-Type A |
| 1.032E-60 | -0.310074  | 0.267 | 0.396 | 2.3E-56 | 17 | IFITM3   | Intercalated cells-Type A |
| 3.261E-57 | -0.3250009 | 0.315 | 0.43  | 7.2E-53 | 17 | CST3     | Intercalated cells-Type A |
| 1.98E-104 | -2.142742  | 0.021 | 0.185 | 4E-100  | 17 | IGKC     | Intercalated cells-Type A |
| 2.75E-102 | -0.3261305 | 0.496 | 0.64  | 6.1E-98 | 17 | H3F3B    | Intercalated cells-Type A |
| 1.22E-105 | -0.2705702 | 0.906 | 0.94  | 3E-101  | 17 | PTMA     | Intercalated cells-Type A |
| 7.029E-51 | -0.2793607 | 0.955 | 0.941 | 1.6E-46 | 17 | RPL39    | Intercalated cells-Type A |
| 2.64E-120 | -0.4503151 | 0.336 | 0.523 | 6E-116  | 17 | DUSP1    | Intercalated cells-Type A |
| 3.94E-102 | -0.3360494 | 0.789 | 0.862 | 8.7E-98 | 17 | NEAT1    | Intercalated cells-Type A |

|           |            |       |       |         |    |          |                           |
|-----------|------------|-------|-------|---------|----|----------|---------------------------|
| 1.732E-45 | -0.4980106 | 0.197 | 0.305 | 3.8E-41 | 17 | ADIRF    | Intercalated cells-Type A |
| 7.04E-153 | -0.3712121 | 0.704 | 0.805 | 2E-148  | 17 | TPT1     | Intercalated cells-Type A |
| 3.682E-64 | -0.3834842 | 0.598 | 0.685 | 8.1E-60 | 17 | FOS      | Intercalated cells-Type A |
| 2.531E-40 | -0.4129019 | 0.381 | 0.463 | 5.6E-36 | 17 | CD74     | Intercalated cells-Type A |
| 3.897E-74 | -0.3708322 | 0.816 | 0.833 | 8.6E-70 | 17 | ACTB     | Intercalated cells-Type A |
| 6.67E-115 | -0.7850684 | 0.19  | 0.381 | 1E-110  | 17 | HLA-DRA  | Intercalated cells-Type A |
| 8.502E-28 | -0.4660866 | 0.451 | 0.514 | 1.9E-23 | 17 | MT2A     | Intercalated cells-Type A |
| 4.05E-191 | -0.5207861 | 0.786 | 0.861 | 9E-187  | 17 | TMSB10   | Intercalated cells-Type A |
| 1.786E-97 | -0.5429949 | 0.93  | 0.886 | 3.9E-93 | 17 | TMSB4X   | Intercalated cells-Type A |
| 0.0005011 | -0.4966843 | 0.284 | 0.24  | 1       | 17 | MT1G     | Intercalated cells-Type A |
| 1.3E-131  | -0.6267967 | 0.964 | 0.95  | 3E-127  | 17 | B2M      | Intercalated cells-Type A |
| 3.556E-17 | -0.7475503 | 0.332 | 0.382 | 7.9E-13 | 17 | SPP1     | Intercalated cells-Type A |
| 8.304E-91 | -0.8459626 | 0.752 | 0.788 | 1.8E-86 | 17 | FTL      | Intercalated cells-Type A |
| 0         | 2.66731329 | 0.995 | 0.023 | 0       | 18 | SPINK1   | Intercalated cells-Type A |
| 0         | 0.51280137 | 0.477 | 0.025 | 0       | 18 | SLC26A7  | Intercalated cells-Type A |
| 0         | 0.47267354 | 0.416 | 0.021 | 0       | 18 | ATP6V1G  | Intercalated cells-Type A |
| 0         | 0.36557148 | 0.339 | 0.015 | 0       | 18 | SLC4A1   | Intercalated cells-Type A |
| 0         | 0.41141817 | 0.411 | 0.024 | 0       | 18 | ATP6V0D  | Intercalated cells-Type A |
| 0         | 0.34293371 | 0.313 | 0.021 | 0       | 18 | RHCG     | Intercalated cells-Type A |
| 0         | 0.35400435 | 0.351 | 0.034 | 0       | 18 | TMEM101  | Intercalated cells-Type A |
| 0         | 0.39125316 | 0.412 | 0.052 | 0       | 18 | TMEM213  | Intercalated cells-Type A |
| 0         | 0.38237309 | 0.42  | 0.052 | 0       | 18 | PTGER3   | Intercalated cells-Type A |
| 0         | 0.42989041 | 0.454 | 0.083 | 0       | 18 | ADGRF5   | Intercalated cells-Type A |
| 0         | 0.4574325  | 0.271 | 0.056 | 0       | 18 | CALB1    | Intercalated cells-Type A |
| 0         | 0.51714476 | 0.57  | 0.155 | 0       | 18 | C12orf75 | Intercalated cells-Type A |
| 0         | 0.76035095 | 0.679 | 0.295 | 0       | 18 | DEFB1    | Intercalated cells-Type A |
| 0         | 0.37240837 | 0.583 | 0.152 | 0       | 18 | IGFBP5   | Intercalated cells-Type A |
| 0         | 0.64999603 | 0.813 | 0.371 | 0       | 18 | ATP1B1   | Intercalated cells-Type A |
| 0         | 0.38615842 | 0.485 | 0.148 | 0       | 18 | ATP6AP2  | Intercalated cells-Type A |
| 0         | 0.3748713  | 0.453 | 0.137 | 0       | 18 | COX7A1   | Intercalated cells-Type A |
| 0         | 0.4341138  | 0.577 | 0.211 | 0       | 18 | ATP6V0B  | Intercalated cells-Type A |
| 0         | 0.49773073 | 0.729 | 0.334 | 0       | 18 | CD24     | Intercalated cells-Type A |
| 0         | 0.26752287 | 0.345 | 0.085 | 0       | 18 | SCIN     | Intercalated cells-Type A |
| 0         | 0.30374404 | 0.42  | 0.121 | 0       | 18 | CA12     | Intercalated cells-Type A |
| 0         | 0.28702076 | 0.377 | 0.104 | 0       | 18 | CKB      | Intercalated cells-Type A |
| 0         | 0.31112992 | 0.413 | 0.124 | 0       | 18 | SMIM24   | Intercalated cells-Type A |
| 0         | 0.27138452 | 0.369 | 0.099 | 0       | 18 | ATP6V1A  | Intercalated cells-Type A |
| 7.4E-162  | 0.64154021 | 0.585 | 0.376 | 2E-157  | 18 | SPP1     | Intercalated cells-Type A |
| 0         | 0.42802799 | 0.691 | 0.313 | 0       | 18 | FXD2     | Intercalated cells-Type A |
| 0         | 0.41906477 | 0.643 | 0.294 | 0       | 18 | RTN4     | Intercalated cells-Type A |
| 0         | 0.31627189 | 0.457 | 0.164 | 0       | 18 | CHCHD10  | Intercalated cells-Type A |
| 7.76E-276 | 0.25797173 | 0.335 | 0.112 | 2E-271  | 18 | RARRES3  | Intercalated cells-Type A |
| 2.19E-281 | 0.27021634 | 0.412 | 0.155 | 5E-277  | 18 | LITAF    | Intercalated cells-Type A |
| 3.06E-306 | 0.41514248 | 0.731 | 0.423 | 7E-302  | 18 | UQCRCQ   | Intercalated cells-Type A |
| 1.94E-282 | 0.37211557 | 0.709 | 0.391 | 4E-278  | 18 | COX7B    | Intercalated cells-Type A |
| 4.63E-214 | 0.30649363 | 0.577 | 0.298 | 1E-209  | 18 | CD9      | Intercalated cells-Type A |
| 1.56E-190 | 0.30851464 | 0.572 | 0.327 | 3E-186  | 18 | COX6A1   | Intercalated cells-Type A |
| 1.17E-225 | 0.44573827 | 0.929 | 0.802 | 3E-221  | 18 | MT-ND4L  | Intercalated cells-Type A |

|           |            |       |       |         |    |          |                           |
|-----------|------------|-------|-------|---------|----|----------|---------------------------|
| 6.57E-176 | 0.26081114 | 0.496 | 0.261 | 1E-171  | 18 | MIF      | Intercalated cells-Type A |
| 5.2E-241  | 0.36072523 | 0.857 | 0.633 | 1E-236  | 18 | COX7C    | Intercalated cells-Type A |
| 1.22E-168 | 0.25563556 | 0.524 | 0.286 | 3E-164  | 18 | COX8A    | Intercalated cells-Type A |
| 3.58E-173 | 0.32718241 | 0.74  | 0.529 | 8E-169  | 18 | NDUFA4   | Intercalated cells-Type A |
| 1.63E-159 | 0.26700648 | 0.629 | 0.389 | 4E-155  | 18 | NDUFA1   | Intercalated cells-Type A |
| 2.2E-160  | 0.26288513 | 0.621 | 0.381 | 5E-156  | 18 | NDUFB2   | Intercalated cells-Type A |
| 1.07E-149 | 0.25470744 | 0.579 | 0.349 | 2E-145  | 18 | COX5B    | Intercalated cells-Type A |
| 5.33E-287 | 0.38033889 | 0.998 | 0.963 | 1E-282  | 18 | MT-ND1   | Intercalated cells-Type A |
| 2.35E-126 | 0.26604402 | 0.656 | 0.46  | 5E-122  | 18 | COX4I1   | Intercalated cells-Type A |
| 5.99E-147 | 0.27347099 | 0.773 | 0.562 | 1E-142  | 18 | ATP5I    | Intercalated cells-Type A |
| 2.41E-307 | 0.3557136  | 1     | 1     | 5E-303  | 18 | MT-CO1   | Intercalated cells-Type A |
| 3.79E-305 | 0.34947404 | 1     | 1     | 8E-301  | 18 | MT-CO3   | Intercalated cells-Type A |
| 5.44E-189 | 0.3197214  | 0.99  | 0.923 | 1E-184  | 18 | MT-ND5   | Intercalated cells-Type A |
| 1.52E-274 | 0.30411301 | 1     | 1     | 3E-270  | 18 | MT-CO2   | Intercalated cells-Type A |
| 4.01E-241 | 0.28867917 | 1     | 0.999 | 9E-237  | 18 | MT-ND4   | Intercalated cells-Type A |
| 3.32E-183 | 0.26783482 | 1     | 0.999 | 7E-179  | 18 | MT-ND3   | Intercalated cells-Type A |
| 7.546E-60 | -0.2555689 | 0.004 | 0.101 | 1.7E-55 | 18 | C1QB     | Intercalated cells-Type A |
| 3.062E-96 | -0.3123555 | 0.011 | 0.163 | 6.8E-92 | 18 | FCER1G   | Intercalated cells-Type A |
| 7.406E-70 | -0.3381025 | 0.009 | 0.124 | 1.6E-65 | 18 | CCL3     | Intercalated cells-Type A |
| 9.141E-67 | -0.3353765 | 0.009 | 0.119 | 2E-62   | 18 | C1QA     | Intercalated cells-Type A |
| 1.5E-104  | -0.2769473 | 0.019 | 0.186 | 3E-100  | 18 | CD52     | Intercalated cells-Type A |
| 3.68E-105 | -0.3417299 | 0.017 | 0.183 | 8E-101  | 18 | RGS1     | Intercalated cells-Type A |
| 2.739E-72 | -0.3201152 | 0.014 | 0.135 | 6.1E-68 | 18 | CCL4     | Intercalated cells-Type A |
| 8.89E-84  | -0.305821  | 0.019 | 0.158 | 2E-79   | 18 | CCL5     | Intercalated cells-Type A |
| 3.98E-114 | -0.3873372 | 0.021 | 0.199 | 9E-110  | 18 | TYROBP   | Intercalated cells-Type A |
| 4.182E-87 | -0.4601905 | 0.016 | 0.158 | 9.2E-83 | 18 | LYZ      | Intercalated cells-Type A |
| 3.47E-228 | -0.5598473 | 0.032 | 0.337 | 8E-224  | 18 | SRGN     | Intercalated cells-Type A |
| 2.22E-137 | -0.357131  | 0.038 | 0.251 | 5E-133  | 18 | CXCR4    | Intercalated cells-Type A |
| 1.31E-104 | -0.3790695 | 0.03  | 0.2   | 3E-100  | 18 | AIF1     | Intercalated cells-Type A |
| 4.5E-134  | -0.2747847 | 0.059 | 0.275 | 1E-129  | 18 | TSC22D3  | Intercalated cells-Type A |
| 5.369E-94 | -0.3030389 | 0.049 | 0.214 | 1.2E-89 | 18 | HLA-DPA1 | Intercalated cells-Type A |
| 1.13E-235 | -0.5226541 | 0.059 | 0.374 | 3E-231  | 18 | VIM      | Intercalated cells-Type A |
| 4.331E-56 | -0.3080334 | 0.04  | 0.149 | 9.6E-52 | 18 | CXCL2    | Intercalated cells-Type A |
| 5.26E-113 | -0.3805054 | 0.052 | 0.239 | 1E-108  | 18 | HLA-DPB1 | Intercalated cells-Type A |
| 2.648E-51 | -0.3072552 | 0.038 | 0.141 | 5.8E-47 | 18 | CTGF     | Intercalated cells-Type A |
| 7.104E-98 | -0.2983304 | 0.081 | 0.261 | 1.6E-93 | 18 | IL32     | Intercalated cells-Type A |
| 2.23E-140 | -0.373249  | 0.078 | 0.304 | 5E-136  | 18 | NFKBIA   | Intercalated cells-Type A |
| 2.04E-137 | -0.410872  | 0.083 | 0.306 | 5E-133  | 18 | S100A4   | Intercalated cells-Type A |
| 2.58E-131 | -0.3378606 | 0.12  | 0.341 | 6E-127  | 18 | SH3BGRL  | Intercalated cells-Type A |
| 1.149E-81 | -0.3923277 | 0.073 | 0.229 | 2.5E-77 | 18 | TIMP1    | Intercalated cells-Type A |
| 3.077E-30 | -0.2515915 | 0.085 | 0.166 | 6.8E-26 | 18 | CXCL14   | Intercalated cells-Type A |
| 5.089E-87 | -0.2899528 | 0.192 | 0.375 | 1.1E-82 | 18 | FOSB     | Intercalated cells-Type A |
| 4.248E-87 | -0.2647129 | 0.225 | 0.401 | 9.4E-83 | 18 | MYL12A   | Intercalated cells-Type A |
| 3.03E-117 | -0.3535446 | 0.173 | 0.386 | 7E-113  | 18 | ZFP36    | Intercalated cells-Type A |
| 1.06E-124 | -0.3649657 | 0.171 | 0.386 | 2E-120  | 18 | CYBA     | Intercalated cells-Type A |
| 1.038E-40 | -0.2926274 | 0.133 | 0.239 | 2.3E-36 | 18 | MT1E     | Intercalated cells-Type A |
| 1.665E-58 | -0.2547805 | 0.262 | 0.399 | 3.7E-54 | 18 | BTG1     | Intercalated cells-Type A |
| 1.204E-19 | -0.2992624 | 0.103 | 0.165 | 2.7E-15 | 18 | MGP      | Intercalated cells-Type A |

|           |            |       |       |         |    |         |                           |
|-----------|------------|-------|-------|---------|----|---------|---------------------------|
| 9.29E-123 | -0.3323863 | 0.273 | 0.481 | 2E-118  | 18 | PFN1    | Intercalated cells-Type A |
| 9.46E-168 | -0.6085913 | 0.118 | 0.374 | 2E-163  | 18 | LGALS1  | Intercalated cells-Type A |
| 2.21E-105 | -2.1437358 | 0.017 | 0.185 | 5E-101  | 18 | IGKC    | Intercalated cells-Type A |
| 1.44E-101 | -0.3355795 | 0.283 | 0.47  | 3.2E-97 | 18 | PABPC1  | Intercalated cells-Type A |
| 1.399E-43 | -0.2754674 | 0.29  | 0.395 | 3.1E-39 | 18 | IFITM3  | Intercalated cells-Type A |
| 1.096E-75 | -0.2672975 | 0.579 | 0.696 | 2.4E-71 | 18 | RPS26   | Intercalated cells-Type A |
| 2.271E-69 | -0.2541986 | 0.783 | 0.833 | 5E-65   | 18 | RPLP2   | Intercalated cells-Type A |
| 8.469E-71 | -0.3504357 | 0.294 | 0.431 | 1.9E-66 | 18 | CST3    | Intercalated cells-Type A |
| 1.028E-73 | -0.2587281 | 0.877 | 0.914 | 2.3E-69 | 18 | RPL13A  | Intercalated cells-Type A |
| 3.684E-80 | -0.261205  | 0.895 | 0.923 | 8.1E-76 | 18 | RPLP1   | Intercalated cells-Type A |
| 2.72E-103 | -0.2719671 | 0.869 | 0.919 | 6E-99   | 18 | RPS27A  | Intercalated cells-Type A |
| 1.372E-76 | -0.2756783 | 0.758 | 0.803 | 3E-72   | 18 | TPT1    | Intercalated cells-Type A |
| 1.27E-181 | -0.4242849 | 0.404 | 0.642 | 3E-177  | 18 | H3F3B   | Intercalated cells-Type A |
| 9.075E-56 | -0.4733734 | 0.173 | 0.305 | 2E-51   | 18 | ADIRF   | Intercalated cells-Type A |
| 4.861E-86 | -0.2895545 | 0.746 | 0.803 | 1.1E-81 | 18 | RPL28   | Intercalated cells-Type A |
| 4.099E-93 | -0.310641  | 0.668 | 0.758 | 9.1E-89 | 18 | RPS3A   | Intercalated cells-Type A |
| 3.966E-96 | -0.2867321 | 0.887 | 0.921 | 8.8E-92 | 18 | RPL13   | Intercalated cells-Type A |
| 4.029E-86 | -0.2987984 | 0.763 | 0.825 | 8.9E-82 | 18 | RPS15A  | Intercalated cells-Type A |
| 2.33E-127 | -0.4619326 | 0.321 | 0.523 | 5E-123  | 18 | DUSP1   | Intercalated cells-Type A |
| 4.41E-108 | -0.3378069 | 0.653 | 0.755 | 1E-103  | 18 | RPL18A  | Intercalated cells-Type A |
| 8.244E-05 | -0.319377  | 0.254 | 0.277 | 1       | 18 | MT1X    | Intercalated cells-Type A |
| 1.569E-29 | -0.3021379 | 0.789 | 0.801 | 3.5E-25 | 18 | FTH1    | Intercalated cells-Type A |
| 8.2E-175  | -0.8969348 | 0.128 | 0.382 | 2E-170  | 18 | HLA-DRA | Intercalated cells-Type A |
| 8.17E-101 | -0.3325075 | 0.855 | 0.895 | 1.8E-96 | 18 | RPS19   | Intercalated cells-Type A |
| 6.46E-122 | -0.354097  | 0.87  | 0.915 | 1E-117  | 18 | RPL10   | Intercalated cells-Type A |
| 2.64E-99  | -0.3584942 | 0.931 | 0.941 | 5.8E-95 | 18 | RPL39   | Intercalated cells-Type A |
| 1.38E-97  | -0.5546305 | 0.301 | 0.465 | 3E-93   | 18 | CD74    | Intercalated cells-Type A |
| 2.106E-88 | -0.3984622 | 0.783 | 0.833 | 4.7E-84 | 18 | ACTB    | Intercalated cells-Type A |
| 6.2E-174  | -0.5695288 | 0.46  | 0.689 | 1E-169  | 18 | FOS     | Intercalated cells-Type A |
| 0         | -0.4750913 | 0.825 | 0.942 | 0       | 18 | PTMA    | Intercalated cells-Type A |
| 3.99E-102 | -0.6617341 | 0.338 | 0.517 | 8.8E-98 | 18 | MT2A    | Intercalated cells-Type A |
| 2.92E-27  | -0.7611776 | 0.162 | 0.243 | 6.5E-23 | 18 | MT1G    | Intercalated cells-Type A |
| 0         | -0.7991607 | 0.628 | 0.865 | 0       | 18 | TMSB10  | Intercalated cells-Type A |
| 7.46E-223 | -0.7331488 | 0.859 | 0.887 | 2E-218  | 18 | TMSB4X  | Intercalated cells-Type A |
| 5.71E-195 | -0.7157473 | 0.945 | 0.95  | 1E-190  | 18 | B2M     | Intercalated cells-Type A |
| 2.368E-69 | -0.8090721 | 0.736 | 0.789 | 5.2E-65 | 18 | FTL     | Intercalated cells-Type A |
| 0         | 1.25979932 | 0.589 | 0.02  | 0       | 19 | IGHGP   | Immune-B cells            |
| 0         | 2.27620629 | 0.806 | 0.054 | 0       | 19 | IGHG1   | Immune-B cells            |
| 0         | 1.98469661 | 0.815 | 0.066 | 0       | 19 | IGHG3   | Immune-B cells            |
| 0         | 4.03626287 | 0.965 | 0.162 | 0       | 19 | IGKC    | Immune-B cells            |
| 0         | 1.34293828 | 0.411 | 0.031 | 0       | 19 | JCHAIN  | Immune-B cells            |
| 0         | 1.26854811 | 0.161 | 0.012 | 0       | 19 | IGHM    | Immune-B cells            |
| 0         | 0.74735672 | 0.477 | 0.027 | 0       | 19 | MZB1    | Immune-B cells            |
| 0         | 1.09209816 | 0.732 | 0.254 | 0       | 19 | SSR4    | Immune-B cells            |
| 0         | 0.69077252 | 0.498 | 0.125 | 0       | 19 | XBP1    | Immune-B cells            |
| 0         | 0.31591332 | 0.31  | 0.042 | 0       | 19 | FKBP11  | Immune-B cells            |
| 0         | 0.2654478  | 0.242 | 0.03  | 0       | 19 | PIM2    | Immune-B cells            |
| 0         | 0.28691814 | 0.306 | 0.058 | 0       | 19 | PRDX4   | Immune-B cells            |

|           |            |       |       |         |    |         |                |
|-----------|------------|-------|-------|---------|----|---------|----------------|
| 1.02E-266 | 0.35689662 | 0.444 | 0.173 | 2E-262  | 19 | RGS1    | Immune-B cells |
| 5.39E-301 | 0.42635504 | 0.696 | 0.373 | 1E-296  | 19 | CYBA    | Immune-B cells |
| 5.64E-273 | 0.26404217 | 0.333 | 0.112 | 1E-268  | 19 | SPCS3   | Immune-B cells |
| 2.15E-167 | 0.30980521 | 0.352 | 0.15  | 5E-163  | 19 | CCL5    | Immune-B cells |
| 1.44E-221 | 0.36385697 | 0.616 | 0.348 | 3E-217  | 19 | SUB1    | Immune-B cells |
| 6.39E-143 | 0.26193758 | 0.384 | 0.191 | 1E-138  | 19 | HERPUD1 | Immune-B cells |
| 0         | 0.47547021 | 0.989 | 0.949 | 0       | 19 | B2M     | Immune-B cells |
| 4.14E-142 | 0.2574736  | 0.443 | 0.243 | 9E-138  | 19 | SPCS2   | Immune-B cells |
| 2.29E-116 | 0.27431769 | 0.579 | 0.387 | 5E-112  | 19 | SEC61G  | Immune-B cells |
| 1.596E-70 | 0.27249622 | 0.45  | 0.304 | 3.5E-66 | 19 | HSP90B1 | Immune-B cells |
| 2.91E-139 | 0.28066726 | 0.856 | 0.689 | 6E-135  | 19 | RPS26   | Immune-B cells |
| 1.43E-200 | 0.31740257 | 0.97  | 0.921 | 3E-196  | 19 | RPLP1   | Immune-B cells |
| 2.892E-74 | 0.26050651 | 0.799 | 0.708 | 6.4E-70 | 19 | HSP90AA | Immune-B cells |
| 1.65E-142 | 0.25315761 | 1     | 0.999 | 4E-138  | 19 | MALAT1  | Immune-B cells |
| 5.489E-87 | -0.3246669 | 0.019 | 0.167 | 1.2E-82 | 19 | CXCL14  | Immune-B cells |
| 5.514E-46 | -0.2774985 | 0.016 | 0.101 | 1.2E-41 | 19 | MT1H    | Immune-B cells |
| 2.353E-77 | -0.3241924 | 0.024 | 0.162 | 5.2E-73 | 19 | MMP7    | Immune-B cells |
| 2E-119    | -0.4137761 | 0.027 | 0.22  | 4E-115  | 19 | CRYAB   | Immune-B cells |
| 8.318E-95 | -0.3059068 | 0.037 | 0.203 | 1.8E-90 | 19 | GPX3    | Immune-B cells |
| 4.08E-133 | -0.2590096 | 0.069 | 0.295 | 9E-129  | 19 | APP     | Immune-B cells |
| 5.64E-127 | -0.2543139 | 0.071 | 0.29  | 1E-122  | 19 | NGFRAP1 | Immune-B cells |
| 3.35E-206 | -0.5629536 | 0.037 | 0.329 | 7E-202  | 19 | FXD2    | Immune-B cells |
| 4.288E-90 | -0.5106677 | 0.024 | 0.179 | 9.5E-86 | 19 | S100A2  | Immune-B cells |
| 4.571E-82 | -0.484374  | 0.024 | 0.166 | 1E-77   | 19 | IGFBP5  | Immune-B cells |
| 1.56E-205 | -0.4730398 | 0.052 | 0.351 | 3E-201  | 19 | CD24    | Immune-B cells |
| 1.48E-119 | -0.4055143 | 0.042 | 0.241 | 3E-115  | 19 | MT1E    | Immune-B cells |
| 1.18E-142 | -0.3077853 | 0.073 | 0.311 | 3E-138  | 19 | CD9     | Immune-B cells |
| 3.753E-97 | -0.2581353 | 0.081 | 0.264 | 8.3E-93 | 19 | ATP1A1  | Immune-B cells |
| 2.16E-78  | -0.3062064 | 0.087 | 0.249 | 4.8E-74 | 19 | HES1    | Immune-B cells |
| 3.55E-173 | -0.7388352 | 0.048 | 0.31  | 8E-169  | 19 | DEFB1   | Immune-B cells |
| 3.14E-243 | -0.8897698 | 0.057 | 0.389 | 7E-239  | 19 | ATP1B1  | Immune-B cells |
| 8.57E-154 | -0.7278236 | 0.055 | 0.299 | 2E-149  | 19 | WFDC2   | Immune-B cells |
| 1.89E-127 | -0.9561748 | 0.038 | 0.246 | 4E-123  | 19 | MT1G    | Immune-B cells |
| 7.083E-96 | -0.2708568 | 0.253 | 0.456 | 1.6E-91 | 19 | S100A11 | Immune-B cells |
| 8.77E-73  | -0.2508044 | 0.281 | 0.448 | 1.9E-68 | 19 | TXNIP   | Immune-B cells |
| 7.91E-110 | -0.3140053 | 0.215 | 0.428 | 2E-105  | 19 | DSTN    | Immune-B cells |
| 1.3E-70   | -0.2788221 | 0.227 | 0.396 | 2.9E-66 | 19 | IFITM3  | Immune-B cells |
| 2.34E-99  | -0.4713014 | 0.103 | 0.296 | 5.2E-95 | 19 | CLU     | Immune-B cells |
| 1.28E-104 | -0.2890187 | 0.342 | 0.538 | 3E-100  | 19 | NDUFA4  | Immune-B cells |
| 1.32E-113 | -0.5940659 | 0.1   | 0.307 | 3E-109  | 19 | ADIRF   | Immune-B cells |
| 5.16E-140 | -0.4489228 | 0.2   | 0.443 | 1E-135  | 19 | HSPB1   | Immune-B cells |
| 2.55E-196 | -0.5889283 | 0.179 | 0.488 | 6E-192  | 19 | IGFBP7  | Immune-B cells |
| 6.216E-66 | -0.4751268 | 0.132 | 0.279 | 1.4E-61 | 19 | MT1X    | Immune-B cells |
| 2.32E-113 | -0.3139679 | 0.64  | 0.805 | 5E-109  | 19 | FTH1    | Immune-B cells |
| 8.59E-233 | -0.4753253 | 0.373 | 0.67  | 2E-228  | 19 | ITM2B   | Immune-B cells |
| 2.13E-169 | -1.0549788 | 0.113 | 0.387 | 5E-165  | 19 | SPP1    | Immune-B cells |
| 3.07E-256 | -0.6280967 | 0.406 | 0.713 | 7E-252  | 19 | S100A6  | Immune-B cells |
| 3.7E-238  | -0.449751  | 0.777 | 0.928 | 8E-234  | 19 | MT-ND5  | Immune-B cells |

|           |            |       |       |        |    |          |                       |
|-----------|------------|-------|-------|--------|----|----------|-----------------------|
| 5.98E-127 | -0.6709884 | 0.296 | 0.517 | 1E-122 | 19 | MT2A     | Immune-B cells        |
| 3.22E-275 | -0.5696228 | 0.554 | 0.811 | 7E-271 | 19 | MT-ND4L  | Immune-B cells        |
| 0         | -0.5207262 | 0.952 | 0.993 | 0      | 19 | MT-CYB   | Immune-B cells        |
| 0         | -0.5377835 | 0.979 | 0.995 | 0      | 19 | MT-ND2   | Immune-B cells        |
| 0         | -0.5560292 | 0.998 | 1     | 0      | 19 | MT-CO2   | Immune-B cells        |
| 0         | -0.5813904 | 0.993 | 1     | 0      | 19 | MT-ND4   | Immune-B cells        |
| 0         | -0.6737589 | 0.842 | 0.967 | 0      | 19 | MT-ND1   | Immune-B cells        |
| 0         | -0.6261763 | 0.954 | 0.995 | 0      | 19 | MT-ATP6  | Immune-B cells        |
| 0         | -0.6167156 | 0.998 | 1     | 0      | 19 | MT-CO1   | Immune-B cells        |
| 0         | -0.6204927 | 0.993 | 0.999 | 0      | 19 | MT-ND3   | Immune-B cells        |
| 0         | -0.7559004 | 0.997 | 1     | 0      | 19 | MT-CO3   | Immune-B cells        |
| 6.77E-138 | -1.1261264 | 0.235 | 0.087 | 1E-133 | 19 | IGLC2    | Immune-B cells        |
| 7.68E-158 | -1.0398388 | 0.228 | 0.077 | 2E-153 | 19 | IGLC3    | Immune-B cells        |
| 0         | 0.92065491 | 0.613 | 0.044 | 0      | 20 | ALDOB    | Proximal tubule cells |
| 0         | 0.53922236 | 0.374 | 0.019 | 0      | 20 | GSTA1    | Proximal tubule cells |
| 0         | 0.30954465 | 0.217 | 0.008 | 0      | 20 | ALB      | Proximal tubule cells |
| 0         | 0.53950413 | 0.381 | 0.025 | 0      | 20 | MIOX     | Proximal tubule cells |
| 0         | 1.71829894 | 0.884 | 0.185 | 0      | 20 | GPX3     | Proximal tubule cells |
| 0         | 1.00683283 | 0.715 | 0.088 | 0      | 20 | GATM     | Proximal tubule cells |
| 0         | 0.42053243 | 0.311 | 0.016 | 0      | 20 | FABP1    | Proximal tubule cells |
| 0         | 0.44580293 | 0.354 | 0.021 | 0      | 20 | PRAP1    | Proximal tubule cells |
| 0         | 0.26759818 | 0.194 | 0.008 | 0      | 20 | GSTA2    | Proximal tubule cells |
| 0         | 0.32711333 | 0.29  | 0.017 | 0      | 20 | CUBN     | Proximal tubule cells |
| 0         | 1.50124886 | 0.816 | 0.229 | 0      | 20 | MT1G     | Proximal tubule cells |
| 0         | 0.48235838 | 0.373 | 0.038 | 0      | 20 | NAT8     | Proximal tubule cells |
| 0         | 0.77635794 | 0.642 | 0.11  | 0      | 20 | PDZK1P1  | Proximal tubule cells |
| 0         | 0.73464496 | 0.5   | 0.091 | 0      | 20 | MT1H     | Proximal tubule cells |
| 0         | 0.73648483 | 0.637 | 0.12  | 0      | 20 | SMIM24   | Proximal tubule cells |
| 0         | 0.46655038 | 0.423 | 0.052 | 0      | 20 | ASS1     | Proximal tubule cells |
| 0         | 0.32532931 | 0.312 | 0.029 | 0      | 20 | AK4      | Proximal tubule cells |
| 0         | 0.55158553 | 0.484 | 0.078 | 0      | 20 | UGT2B7   | Proximal tubule cells |
| 0         | 0.82554714 | 0.715 | 0.178 | 0      | 20 | APOE     | Proximal tubule cells |
| 0         | 0.59334042 | 0.483 | 0.096 | 0      | 20 | SUCLG1   | Proximal tubule cells |
| 0         | 0.30506589 | 0.287 | 0.032 | 0      | 20 | TMEM27   | Proximal tubule cells |
| 0         | 0.38236501 | 0.383 | 0.055 | 0      | 20 | LGALS2   | Proximal tubule cells |
| 0         | 0.36190036 | 0.261 | 0.036 | 0      | 20 | PCK1     | Proximal tubule cells |
| 0         | 0.54093619 | 0.445 | 0.092 | 0      | 20 | MGST1    | Proximal tubule cells |
| 0         | 0.31142967 | 0.285 | 0.037 | 0      | 20 | ACSM2B   | Proximal tubule cells |
| 0         | 0.32476478 | 0.316 | 0.045 | 0      | 20 | RBP5     | Proximal tubule cells |
| 0         | 0.37491775 | 0.386 | 0.074 | 0      | 20 | C11orf54 | Proximal tubule cells |
| 0         | 0.32286609 | 0.309 | 0.057 | 0      | 20 | ACSM2A   | Proximal tubule cells |
| 0         | 0.44794034 | 0.479 | 0.124 | 0      | 20 | MT1F     | Proximal tubule cells |
| 0         | 0.57688856 | 0.684 | 0.267 | 0      | 20 | MT1X     | Proximal tubule cells |
| 0         | 0.41647613 | 0.542 | 0.156 | 0      | 20 | CXCL14   | Proximal tubule cells |
| 0         | 0.41906417 | 0.704 | 0.315 | 0      | 20 | FXYD2    | Proximal tubule cells |
| 6.43E-266 | 0.31394089 | 0.379 | 0.132 | 1E-261 | 20 | DAB2     | Proximal tubule cells |
| 1.56E-214 | 0.3157754  | 0.425 | 0.18  | 3E-210 | 20 | CYB5A    | Proximal tubule cells |
| 3.05E-135 | 0.32432551 | 0.505 | 0.294 | 7E-131 | 20 | TXN      | Proximal tubule cells |

|           |            |       |       |         |    |          |                       |
|-----------|------------|-------|-------|---------|----|----------|-----------------------|
| 0         | 0.44237511 | 0.966 | 0.784 | 0       | 20 | FTL      | Proximal tubule cells |
| 1.03E-167 | 0.26098403 | 0.476 | 0.231 | 2E-163  | 20 | MT1E     | Proximal tubule cells |
| 1.02E-200 | 0.41455402 | 0.808 | 0.634 | 2E-196  | 20 | COX7C    | Proximal tubule cells |
| 1.21E-142 | 0.28909755 | 0.475 | 0.261 | 3E-138  | 20 | LAMTOR5  | Proximal tubule cells |
| 2.5E-129  | 0.30285482 | 0.491 | 0.285 | 6E-125  | 20 | ATPIF1   | Proximal tubule cells |
| 2.19E-145 | 0.34574725 | 0.639 | 0.426 | 5E-141  | 20 | UQCRCQ   | Proximal tubule cells |
| 0         | 0.50948985 | 1     | 0.999 | 0       | 20 | MT-ND3   | Proximal tubule cells |
| 2.52E-129 | 0.26055702 | 0.466 | 0.253 | 6E-125  | 20 | PEBP1    | Proximal tubule cells |
| 3.083E-75 | 0.25052785 | 0.375 | 0.212 | 6.8E-71 | 20 | CRYAB    | Proximal tubule cells |
| 9.14E-106 | 0.29066246 | 0.618 | 0.434 | 2E-101  | 20 | RPS27L   | Proximal tubule cells |
| 2.43E-106 | 0.30014281 | 0.717 | 0.564 | 5E-102  | 20 | ATP5I    | Proximal tubule cells |
| 4.07E-154 | 0.30492078 | 0.956 | 0.802 | 9E-150  | 20 | MT-ND4L  | Proximal tubule cells |
| 1.67E-222 | 0.36010228 | 1     | 0.994 | 4E-218  | 20 | MT-ATP6  | Proximal tubule cells |
| 1.15E-190 | 0.33965283 | 1     | 0.995 | 3E-186  | 20 | MT-ND2   | Proximal tubule cells |
| 1.66E-198 | 0.34090498 | 1     | 1     | 4E-194  | 20 | MT-CO3   | Proximal tubule cells |
| 4.45E-166 | 0.28882389 | 1     | 0.999 | 1E-161  | 20 | MT-ND4   | Proximal tubule cells |
| 3.13E-132 | 0.27441375 | 1     | 1     | 7E-128  | 20 | MT-CO1   | Proximal tubule cells |
| 3.98E-142 | 0.27217325 | 0.999 | 0.992 | 9E-138  | 20 | MT-CYB   | Proximal tubule cells |
| 7.825E-54 | -0.326477  | 0.012 | 0.118 | 1.7E-49 | 20 | C1QA     | Proximal tubule cells |
| 8.827E-54 | -0.3230577 | 0.015 | 0.123 | 2E-49   | 20 | CCL3     | Proximal tubule cells |
| 6.317E-67 | -0.2911727 | 0.027 | 0.162 | 1.4E-62 | 20 | FCER1G   | Proximal tubule cells |
| 3.44E-60  | -0.3114305 | 0.025 | 0.149 | 7.6E-56 | 20 | CXCL2    | Proximal tubule cells |
| 4.331E-82 | -0.3615048 | 0.037 | 0.198 | 9.6E-78 | 20 | TYROBP   | Proximal tubule cells |
| 6.574E-44 | -0.277124  | 0.034 | 0.135 | 1.5E-39 | 20 | CCL4     | Proximal tubule cells |
| 5.555E-78 | -0.3545134 | 0.041 | 0.199 | 1.2E-73 | 20 | AIF1     | Proximal tubule cells |
| 1.952E-64 | -0.4393157 | 0.027 | 0.158 | 4.3E-60 | 20 | LYZ      | Proximal tubule cells |
| 5.827E-45 | -0.3085825 | 0.037 | 0.14  | 1.3E-40 | 20 | CTGF     | Proximal tubule cells |
| 5.859E-52 | -0.273495  | 0.059 | 0.182 | 1.3E-47 | 20 | RGS1     | Proximal tubule cells |
| 1.793E-38 | -0.2973469 | 0.045 | 0.138 | 4E-34   | 20 | SPARCL1  | Proximal tubule cells |
| 1.568E-55 | -0.2615675 | 0.079 | 0.212 | 3.5E-51 | 20 | HLA-DPA1 | Proximal tubule cells |
| 4.433E-84 | -0.2551627 | 0.119 | 0.309 | 9.8E-80 | 20 | CD9      | Proximal tubule cells |
| 1.815E-55 | -0.3836569 | 0.043 | 0.166 | 4E-51   | 20 | MGP      | Proximal tubule cells |
| 1.158E-62 | -0.321297  | 0.091 | 0.238 | 2.6E-58 | 20 | HLA-DPB1 | Proximal tubule cells |
| 3.93E-140 | -0.488397  | 0.085 | 0.335 | 9E-136  | 20 | SRGN     | Proximal tubule cells |
| 2.675E-46 | -0.2659504 | 0.119 | 0.248 | 5.9E-42 | 20 | HES1     | Proximal tubule cells |
| 5.909E-63 | -0.3700717 | 0.079 | 0.229 | 1.3E-58 | 20 | TIMP1    | Proximal tubule cells |
| 8.024E-77 | -0.3257843 | 0.126 | 0.304 | 1.8E-72 | 20 | S100A4   | Proximal tubule cells |
| 1.648E-84 | -0.2740757 | 0.204 | 0.405 | 3.6E-80 | 20 | ZFP36L1  | Proximal tubule cells |
| 2.439E-51 | -0.2600787 | 0.161 | 0.302 | 5.4E-47 | 20 | NFKBIA   | Proximal tubule cells |
| 2.788E-56 | -0.4912814 | 0.051 | 0.178 | 6.2E-52 | 20 | S100A2   | Proximal tubule cells |
| 2.832E-83 | -0.2961304 | 0.178 | 0.374 | 6.3E-79 | 20 | FOSB     | Proximal tubule cells |
| 9.72E-103 | -0.3510845 | 0.167 | 0.385 | 2.1E-98 | 20 | ZFP36    | Proximal tubule cells |
| 1.024E-86 | -0.2840436 | 0.254 | 0.456 | 2.3E-82 | 20 | S100A11  | Proximal tubule cells |
| 1.233E-86 | -0.343005  | 0.198 | 0.403 | 2.7E-82 | 20 | EGR1     | Proximal tubule cells |
| 6.505E-73 | -0.2565948 | 0.384 | 0.567 | 1.4E-68 | 20 | CALM2    | Proximal tubule cells |
| 4.573E-83 | -0.340412  | 0.204 | 0.396 | 1E-78   | 20 | IFITM3   | Proximal tubule cells |
| 4.512E-82 | -0.3590918 | 0.185 | 0.37  | 1E-77   | 20 | VIM      | Proximal tubule cells |
| 1.876E-92 | -0.3115376 | 0.317 | 0.528 | 4.1E-88 | 20 | HLA-B    | Proximal tubule cells |

|           |            |       |       |         |    |         |                       |
|-----------|------------|-------|-------|---------|----|---------|-----------------------|
| 9.42E-141 | -0.5971609 | 0.117 | 0.373 | 2E-136  | 20 | LGALS1  | Proximal tubule cells |
| 4.598E-26 | -0.3812741 | 0.084 | 0.165 | 1E-21   | 20 | IGFBP5  | Proximal tubule cells |
| 1.464E-91 | -0.3335803 | 0.314 | 0.526 | 3.2E-87 | 20 | JUN     | Proximal tubule cells |
| 3.411E-90 | -0.3494843 | 0.289 | 0.491 | 7.5E-86 | 20 | HSPA1B  | Proximal tubule cells |
| 2.88E-99  | -0.3913263 | 0.255 | 0.47  | 6.4E-95 | 20 | HSPA1A  | Proximal tubule cells |
| 3.64E-171 | -0.4242835 | 0.362 | 0.642 | 8E-167  | 20 | H3F3B   | Proximal tubule cells |
| 2.54E-152 | -0.4986741 | 0.253 | 0.524 | 6E-148  | 20 | DUSP1   | Proximal tubule cells |
| 6.897E-42 | -0.3275561 | 0.356 | 0.483 | 1.5E-37 | 20 | IGFBP7  | Proximal tubule cells |
| 2.57E-88  | -0.620008  | 0.12  | 0.308 | 5.7E-84 | 20 | DEFB1   | Proximal tubule cells |
| 2.243E-94 | -0.3434329 | 0.539 | 0.714 | 5E-90   | 20 | HSP90AA | Proximal tubule cells |
| 4.472E-62 | -0.2933755 | 0.785 | 0.861 | 9.9E-58 | 20 | TMSB10  | Proximal tubule cells |
| 9.659E-69 | -0.4019827 | 0.429 | 0.578 | 2.1E-64 | 20 | SAT1    | Proximal tubule cells |
| 5.695E-41 | -0.4149842 | 0.355 | 0.463 | 1.3E-36 | 20 | CD74    | Proximal tubule cells |
| 7.41E-214 | -0.4636656 | 0.614 | 0.865 | 2E-209  | 20 | NEAT1   | Proximal tubule cells |
| 5.149E-41 | -0.5569003 | 0.181 | 0.296 | 1.1E-36 | 20 | WFDC2   | Proximal tubule cells |
| 3.2E-263  | -0.7124856 | 0.368 | 0.713 | 7E-259  | 20 | S100A6  | Proximal tubule cells |
| 1.814E-86 | -0.7523625 | 0.201 | 0.38  | 4E-82   | 20 | HLA-DRA | Proximal tubule cells |
| 6E-280    | -0.4768105 | 0.806 | 0.941 | 1E-275  | 20 | PTMA    | Proximal tubule cells |
| 1.4E-219  | -0.7331997 | 0.406 | 0.689 | 3E-215  | 20 | FOS     | Proximal tubule cells |
| 4.24E-226 | -0.6018109 | 0.639 | 0.836 | 9E-222  | 20 | ACTB    | Proximal tubule cells |
| 7.269E-68 | -2.1027633 | 0.041 | 0.184 | 1.6E-63 | 20 | IGKC    | Proximal tubule cells |
| 1.47E-52  | -0.3442374 | 0.582 | 0.376 | 3.2E-48 | 20 | SPP1    | Proximal tubule cells |
| 0         | -0.6044756 | 0.969 | 1     | 0       | 20 | MALAT1  | Proximal tubule cells |
| 0         | -1.0047917 | 0.698 | 0.891 | 0       | 20 | TMSB4X  | Proximal tubule cells |
| 5.7E-277  | -0.8633309 | 0.889 | 0.951 | 1E-272  | 20 | B2M     | Proximal tubule cells |
| 0         | 2.22204934 | 0.983 | 0.37  | 0       | 21 | SPP1    | Immune-Neutrophil     |
| 2.88E-285 | 0.69593048 | 0.655 | 0.298 | 6E-281  | 21 | DEFB1   | Immune-Neutrophil     |
| 0         | 0.60124029 | 0.733 | 0.324 | 0       | 21 | CTSD    | Immune-Neutrophil     |
| 3.88E-220 | 0.31236256 | 0.271 | 0.075 | 9E-216  | 21 | SLC8A1  | Immune-Neutrophil     |
| 3.206E-76 | 0.44288089 | 0.201 | 0.084 | 7.1E-72 | 21 | APOC1   | Immune-Neutrophil     |
| 3.23E-242 | 0.28684789 | 0.298 | 0.082 | 7E-238  | 21 | ITGB6   | Immune-Neutrophil     |
| 6.48E-266 | 0.29863875 | 0.368 | 0.107 | 1E-261  | 21 | TMEM52B | Immune-Neutrophil     |
| 4.98E-219 | 0.42717387 | 0.611 | 0.288 | 1E-214  | 21 | WFDC2   | Immune-Neutrophil     |
| 1.51E-190 | 0.37643293 | 0.54  | 0.255 | 3E-186  | 21 | ATP1A1  | Immune-Neutrophil     |
| 1.53E-182 | 0.30463    | 0.388 | 0.151 | 3E-178  | 21 | CDH16   | Immune-Neutrophil     |
| 8.61E-162 | 0.33645284 | 0.68  | 0.376 | 2E-157  | 21 | ATP1B1  | Immune-Neutrophil     |
| 2.454E-39 | 0.30533119 | 0.208 | 0.114 | 5.4E-35 | 21 | C1QA    | Immune-Neutrophil     |
| 5.534E-39 | 0.31469791 | 0.26  | 0.16  | 1.2E-34 | 21 | CTSB    | Immune-Neutrophil     |
| 2.003E-38 | 0.25174796 | 0.185 | 0.097 | 4.4E-34 | 21 | C1QB    | Immune-Neutrophil     |
| 4.383E-18 | 0.3568882  | 0.252 | 0.188 | 9.7E-14 | 21 | APOE    | Immune-Neutrophil     |
| 1.78E-248 | 0.47157939 | 1     | 1     | 4E-244  | 21 | MT-CO1  | Immune-Neutrophil     |
| 5.937E-22 | 0.28266557 | 0.171 | 0.107 | 1.3E-17 | 21 | FABP5   | Immune-Neutrophil     |
| 2.21E-225 | 0.42192063 | 1     | 1     | 5E-221  | 21 | MT-CO3  | Immune-Neutrophil     |
| 7.7E-82   | 0.25098177 | 0.555 | 0.34  | 1.7E-77 | 21 | CD24    | Immune-Neutrophil     |
| 2.36E-146 | 0.39071147 | 0.987 | 0.964 | 5E-142  | 21 | MT-ND1  | Immune-Neutrophil     |
| 5.97E-76  | 0.25377807 | 0.52  | 0.332 | 1.3E-71 | 21 | MTRNR2L | Immune-Neutrophil     |
| 1.43E-123 | 0.29052179 | 0.999 | 0.999 | 3E-119  | 21 | MT-ND4  | Immune-Neutrophil     |
| 1.03E-126 | 0.279216   | 1     | 1     | 2E-122  | 21 | MT-CO2  | Immune-Neutrophil     |

|           |            |       |       |         |    |         |                   |
|-----------|------------|-------|-------|---------|----|---------|-------------------|
| 4.99E-104 | 0.25840389 | 0.998 | 0.994 | 1E-99   | 21 | MT-ATP6 | Immune-Neutrophil |
| 3.934E-40 | -0.3159427 | 0.034 | 0.14  | 8.7E-36 | 21 | CTGF    | Immune-Neutrophil |
| 1.744E-46 | -0.2507405 | 0.056 | 0.183 | 3.9E-42 | 21 | SPARC   | Immune-Neutrophil |
| 3.154E-36 | -0.2624851 | 0.053 | 0.157 | 7E-32   | 21 | CCL5    | Immune-Neutrophil |
| 1.359E-60 | -0.2792423 | 0.095 | 0.259 | 3E-56   | 21 | IL32    | Immune-Neutrophil |
| 1.398E-52 | -0.2723663 | 0.099 | 0.249 | 3.1E-48 | 21 | CXCR4   | Immune-Neutrophil |
| 7.953E-59 | -0.2600621 | 0.213 | 0.385 | 1.8E-54 | 21 | JUNB    | Immune-Neutrophil |
| 5.842E-26 | -0.2515751 | 0.149 | 0.247 | 1.3E-21 | 21 | HES1    | Immune-Neutrophil |
| 6.837E-60 | -0.2854077 | 0.226 | 0.399 | 1.5E-55 | 21 | BTG1    | Immune-Neutrophil |
| 8.287E-19 | -0.3071072 | 0.092 | 0.164 | 1.8E-14 | 21 | MGP     | Immune-Neutrophil |
| 2.651E-75 | -0.2766839 | 0.341 | 0.539 | 5.9E-71 | 21 | RPL30   | Immune-Neutrophil |
| 3.744E-67 | -0.2582549 | 0.38  | 0.56  | 8.3E-63 | 21 | RPL29   | Immune-Neutrophil |
| 1.148E-72 | -0.2612319 | 0.4   | 0.592 | 2.5E-68 | 21 | RPL18   | Immune-Neutrophil |
| 1.199E-69 | -0.2633881 | 0.379 | 0.558 | 2.6E-65 | 21 | RPS7    | Immune-Neutrophil |
| 6.265E-56 | -0.2798016 | 0.301 | 0.468 | 1.4E-51 | 21 | PABPC1  | Immune-Neutrophil |
| 6.976E-83 | -0.289351  | 0.379 | 0.579 | 1.5E-78 | 21 | RPL10A  | Immune-Neutrophil |
| 6.854E-69 | -0.2673004 | 0.467 | 0.634 | 1.5E-64 | 21 | RPL37   | Immune-Neutrophil |
| 1.463E-86 | -0.2969192 | 0.421 | 0.619 | 3.2E-82 | 21 | RPS16   | Immune-Neutrophil |
| 5.49E-103 | -0.3396853 | 0.377 | 0.594 | 1.2E-98 | 21 | RPS5    | Immune-Neutrophil |
| 1.368E-73 | -0.2775939 | 0.547 | 0.701 | 3E-69   | 21 | RPS17   | Immune-Neutrophil |
| 1.218E-68 | -0.2517505 | 0.725 | 0.841 | 2.7E-64 | 21 | RPL35   | Immune-Neutrophil |
| 3.334E-98 | -0.2791039 | 0.676 | 0.862 | 7.4E-94 | 21 | TMSB10  | Immune-Neutrophil |
| 1.787E-90 | -0.3101568 | 0.47  | 0.662 | 3.9E-86 | 21 | RPL6    | Immune-Neutrophil |
| 8.867E-68 | -0.2503613 | 0.756 | 0.858 | 2E-63   | 21 | RPL36   | Immune-Neutrophil |
| 2.442E-83 | -0.3658309 | 0.319 | 0.526 | 5.4E-79 | 21 | JUN     | Immune-Neutrophil |
| 1.747E-65 | -0.2912789 | 0.488 | 0.639 | 3.9E-61 | 21 | H3F3B   | Immune-Neutrophil |
| 9.977E-69 | -0.2715513 | 0.626 | 0.754 | 2.2E-64 | 21 | RPS24   | Immune-Neutrophil |
| 3.28E-98  | -0.3193875 | 0.525 | 0.705 | 7.2E-94 | 21 | RPL19   | Immune-Neutrophil |
| 6.07E-102 | -0.3307903 | 0.508 | 0.688 | 1.3E-97 | 21 | RPL15   | Immune-Neutrophil |
| 3.497E-83 | -0.3109414 | 0.562 | 0.713 | 7.7E-79 | 21 | RPS13   | Immune-Neutrophil |
| 1.002E-20 | -0.3727583 | 0.187 | 0.278 | 2.2E-16 | 21 | MT1X    | Immune-Neutrophil |
| 3.053E-69 | -0.2895274 | 0.697 | 0.803 | 6.7E-65 | 21 | RPL28   | Immune-Neutrophil |
| 8.138E-61 | -0.2737705 | 0.859 | 0.929 | 1.8E-56 | 21 | RPS29   | Immune-Neutrophil |
| 8.38E-88  | -0.3148326 | 0.612 | 0.757 | 1.9E-83 | 21 | RPL7    | Immune-Neutrophil |
| 1.067E-98 | -0.3465782 | 0.533 | 0.718 | 2.4E-94 | 21 | RPS4X   | Immune-Neutrophil |
| 7.8E-124  | -0.3936398 | 0.432 | 0.658 | 2E-119  | 21 | RPS3    | Immune-Neutrophil |
| 8.278E-60 | -0.5657976 | 0.141 | 0.305 | 1.8E-55 | 21 | ADIRF   | Immune-Neutrophil |
| 4.986E-89 | -0.2945235 | 0.802 | 0.89  | 1.1E-84 | 21 | RPS28   | Immune-Neutrophil |
| 2.05E-107 | -0.3204772 | 0.69  | 0.832 | 5E-103  | 21 | RPS23   | Immune-Neutrophil |
| 3.433E-71 | -0.3756682 | 0.487 | 0.687 | 7.6E-67 | 21 | FOS     | Immune-Neutrophil |
| 1.87E-127 | -0.3813151 | 0.531 | 0.74  | 4E-123  | 21 | RPL27A  | Immune-Neutrophil |
| 4.62E-99  | -0.295134  | 0.873 | 0.94  | 1E-94   | 21 | PTMA    | Immune-Neutrophil |
| 5.29E-91  | -0.3645904 | 0.533 | 0.704 | 1.2E-86 | 21 | RPS2    | Immune-Neutrophil |
| 4.57E-126 | -0.3648674 | 0.614 | 0.799 | 1E-121  | 21 | RPS25   | Immune-Neutrophil |
| 9.9E-120  | -0.3478741 | 0.723 | 0.89  | 2E-115  | 21 | TMSB4X  | Immune-Neutrophil |
| 1.27E-125 | -0.3761024 | 0.626 | 0.813 | 3E-121  | 21 | RPL12   | Immune-Neutrophil |
| 4.176E-05 | -0.308244  | 0.494 | 0.513 | 0.92253 | 21 | MT2A    | Immune-Neutrophil |
| 4.15E-115 | -0.3158881 | 0.911 | 0.968 | 9E-111  | 21 | RPL41   | Immune-Neutrophil |

|           |            |       |       |         |    |          |                   |
|-----------|------------|-------|-------|---------|----|----------|-------------------|
| 2.92E-157 | -0.4182527 | 0.556 | 0.776 | 6E-153  | 21 | RPL23A   | Immune-Neutrophil |
| 7.54E-137 | -0.4101199 | 0.539 | 0.737 | 2E-132  | 21 | RPL3     | Immune-Neutrophil |
| 3.96E-157 | -0.4218942 | 0.545 | 0.76  | 9E-153  | 21 | RPL35A   | Immune-Neutrophil |
| 2.48E-148 | -0.4376209 | 0.53  | 0.76  | 5E-144  | 21 | RPS3A    | Immune-Neutrophil |
| 1.49E-122 | -0.3436697 | 0.849 | 0.952 | 3E-118  | 21 | B2M      | Immune-Neutrophil |
| 1.07E-135 | -0.3909281 | 0.633 | 0.803 | 2E-131  | 21 | RPL11    | Immune-Neutrophil |
| 6.76E-105 | -0.3592223 | 0.716 | 0.834 | 1E-100  | 21 | RPLP2    | Immune-Neutrophil |
| 2.34E-151 | -0.412041  | 0.65  | 0.84  | 5E-147  | 21 | RPL26    | Immune-Neutrophil |
| 2.01E-137 | -0.3926581 | 0.7   | 0.86  | 4E-133  | 21 | RPS12    | Immune-Neutrophil |
| 3.92E-153 | -0.4536223 | 0.548 | 0.756 | 9E-149  | 21 | RPL18A   | Immune-Neutrophil |
| 3.661E-89 | -0.3529061 | 0.88  | 0.942 | 8.1E-85 | 21 | RPL39    | Immune-Neutrophil |
| 4.39E-166 | -0.4089799 | 0.749 | 0.898 | 1E-161  | 21 | RPS15    | Immune-Neutrophil |
| 8.75E-148 | -0.4199369 | 0.7   | 0.853 | 2E-143  | 21 | RPS6     | Immune-Neutrophil |
| 3.12E-143 | -0.3914707 | 0.838 | 0.923 | 7E-139  | 21 | RPLP1    | Immune-Neutrophil |
| 1.75E-180 | -0.4223049 | 0.784 | 0.921 | 4E-176  | 21 | RPS27A   | Immune-Neutrophil |
| 1.23E-164 | -0.4357237 | 0.773 | 0.905 | 3E-160  | 21 | RPL32    | Immune-Neutrophil |
| 1.78E-217 | -0.4795832 | 0.704 | 0.883 | 4E-213  | 21 | RPS14    | Immune-Neutrophil |
| 8.35E-167 | -0.4731197 | 0.743 | 0.897 | 2E-162  | 21 | RPS19    | Immune-Neutrophil |
| 3.83E-215 | -0.5445841 | 0.604 | 0.828 | 8E-211  | 21 | RPS15A   | Immune-Neutrophil |
| 5.1E-203  | -0.4788308 | 0.78  | 0.922 | 1E-198  | 21 | RPL13    | Immune-Neutrophil |
| 7.91E-232 | -0.5514431 | 0.642 | 0.863 | 2E-227  | 21 | RPS8     | Immune-Neutrophil |
| 3.16E-206 | -0.4848799 | 0.782 | 0.915 | 7E-202  | 21 | RPL13A   | Immune-Neutrophil |
| 6.54E-184 | -0.480291  | 0.819 | 0.925 | 1E-179  | 21 | RPS18    | Immune-Neutrophil |
| 5.48E-262 | -0.5670571 | 0.828 | 0.95  | 1E-257  | 21 | RPL21    | Immune-Neutrophil |
| 2.57E-297 | -0.648375  | 0.72  | 0.917 | 6E-293  | 21 | RPL10    | Immune-Neutrophil |
| 2.19E-293 | -0.5637548 | 0.909 | 0.98  | 5E-289  | 21 | RPL34    | Immune-Neutrophil |
| 0         | -0.6811036 | 0.873 | 0.972 | 0       | 21 | RPS27    | Immune-Neutrophil |
| 0.0002691 | -0.6824331 | 0.224 | 0.241 | 1       | 21 | MT1G     | Immune-Neutrophil |
| 1.079E-32 | -1.9805058 | 0.078 | 0.183 | 2.4E-28 | 21 | IGKC     | Immune-Neutrophil |
| 0         | 4.80849179 | 0.96  | 0.076 | 0       | 22 | IGLC2    | Immune-B cells    |
| 0         | 3.82932581 | 0.757 | 0.07  | 0       | 22 | IGLC3    | Immune-B cells    |
| 0         | 2.6065457  | 0.794 | 0.06  | 0       | 22 | IGHG1    | Immune-B cells    |
| 0         | 2.66175624 | 0.775 | 0.072 | 0       | 22 | IGHG3    | Immune-B cells    |
| 0         | 1.20294285 | 0.528 | 0.025 | 0       | 22 | IGHGP    | Immune-B cells    |
| 0         | 1.42241934 | 0.468 | 0.033 | 0       | 22 | JCHAIN   | Immune-B cells    |
| 0         | 0.93917104 | 0.591 | 0.029 | 0       | 22 | MZB1     | Immune-B cells    |
| 0         | 0.49901383 | 0.149 | 0.005 | 0       | 22 | IGLV6-57 | Immune-B cells    |
| 0         | 1.18932854 | 0.158 | 0.013 | 0       | 22 | IGHM     | Immune-B cells    |
| 0         | 0.44747743 | 0.131 | 0.008 | 0       | 22 | IGLV3-21 | Immune-B cells    |
| 0         | 0.28894494 | 0.262 | 0.012 | 0       | 22 | DERL3    | Immune-B cells    |
| 0         | 0.27718515 | 0.121 | 0.007 | 0       | 22 | IGLV3-1  | Immune-B cells    |
| 0         | 0.79482659 | 0.585 | 0.127 | 0       | 22 | XBP1     | Immune-B cells    |
| 0         | 1.18568623 | 0.758 | 0.257 | 0       | 22 | SSR4     | Immune-B cells    |
| 0         | 0.38539571 | 0.383 | 0.043 | 0       | 22 | FKBP11   | Immune-B cells    |
| 0         | 1.06710324 | 0.554 | 0.175 | 0       | 22 | IGKC     | Immune-B cells    |
| 0         | 0.26829727 | 0.252 | 0.031 | 0       | 22 | PIM2     | Immune-B cells    |
| 0         | 0.33498667 | 0.354 | 0.059 | 0       | 22 | PRDX4    | Immune-B cells    |
| 6.18E-195 | 0.3627923  | 0.464 | 0.191 | 1E-190  | 22 | HERPUD1  | Immune-B cells    |

|           |            |       |       |         |    |         |                |
|-----------|------------|-------|-------|---------|----|---------|----------------|
| 2.77E-223 | 0.27010955 | 0.357 | 0.113 | 6E-219  | 22 | SPCS3   | Immune-B cells |
| 1.89E-222 | 0.42072098 | 0.718 | 0.375 | 4E-218  | 22 | CYBA    | Immune-B cells |
| 2.96E-167 | 0.30673948 | 0.438 | 0.175 | 7E-163  | 22 | RGS1    | Immune-B cells |
| 2.79E-171 | 0.37160992 | 0.633 | 0.349 | 6E-167  | 22 | SUB1    | Immune-B cells |
| 1.34E-133 | 0.27019163 | 0.484 | 0.244 | 3E-129  | 22 | SPCS2   | Immune-B cells |
| 1.955E-70 | 0.33665267 | 0.475 | 0.304 | 4.3E-66 | 22 | HSP90B1 | Immune-B cells |
| 9.91E-117 | 0.26369266 | 0.45  | 0.23  | 2E-112  | 22 | SPCS1   | Immune-B cells |
| 1.46E-106 | 0.30538362 | 0.61  | 0.387 | 3E-102  | 22 | SEC61G  | Immune-B cells |
| 1.76E-170 | 0.36426052 | 0.995 | 0.949 | 4E-166  | 22 | B2M     | Immune-B cells |
| 2.73E-105 | 0.26982822 | 0.984 | 0.921 | 6E-101  | 22 | RPLP1   | Immune-B cells |
| 2.448E-89 | -0.4232242 | 0.017 | 0.219 | 5.4E-85 | 22 | CRYAB   | Immune-B cells |
| 4.252E-61 | -0.3184936 | 0.018 | 0.166 | 9.4E-57 | 22 | CXCL14  | Immune-B cells |
| 1.141E-57 | -0.3437303 | 0.019 | 0.161 | 2.5E-53 | 22 | MMP7    | Immune-B cells |
| 6.362E-70 | -0.5435432 | 0.014 | 0.178 | 1.4E-65 | 22 | S100A2  | Immune-B cells |
| 4.157E-62 | -0.501525  | 0.016 | 0.165 | 9.2E-58 | 22 | IGFBP5  | Immune-B cells |
| 4.56E-144 | -0.550703  | 0.03  | 0.327 | 1E-139  | 22 | FXD2    | Immune-B cells |
| 5.279E-66 | -0.2983338 | 0.035 | 0.202 | 1.2E-61 | 22 | GPX3    | Immune-B cells |
| 4.63E-102 | -0.2753234 | 0.056 | 0.294 | 1E-97   | 22 | APP     | Immune-B cells |
| 4.93E-147 | -0.4811103 | 0.044 | 0.348 | 1E-142  | 22 | CD24    | Immune-B cells |
| 6.753E-84 | -0.2844313 | 0.057 | 0.263 | 1.5E-79 | 22 | ATP1A1  | Immune-B cells |
| 1.13E-108 | -0.3218798 | 0.06  | 0.309 | 3E-104  | 22 | CD9     | Immune-B cells |
| 9.241E-83 | -0.4001623 | 0.04  | 0.24  | 2E-78   | 22 | MT1E    | Immune-B cells |
| 9.93E-126 | -0.7816741 | 0.03  | 0.297 | 2E-121  | 22 | WFDC2   | Immune-B cells |
| 1.41E-128 | -0.7327758 | 0.034 | 0.308 | 3E-124  | 22 | DEFB1   | Immune-B cells |
| 5.522E-66 | -0.334172  | 0.069 | 0.248 | 1.2E-61 | 22 | HES1    | Immune-B cells |
| 5.34E-75  | -0.2526699 | 0.154 | 0.364 | 1.2E-70 | 22 | LAPTM4A | Immune-B cells |
| 1.043E-78 | -0.270628  | 0.158 | 0.381 | 2.3E-74 | 22 | S100A10 | Immune-B cells |
| 1.34E-164 | -0.8176034 | 0.054 | 0.387 | 3E-160  | 22 | ATP1B1  | Immune-B cells |
| 1.473E-89 | -0.5216677 | 0.072 | 0.295 | 3.3E-85 | 22 | CLU     | Immune-B cells |
| 8.417E-66 | -0.3111345 | 0.193 | 0.396 | 1.9E-61 | 22 | IFITM3  | Immune-B cells |
| 2.38E-100 | -0.3406975 | 0.203 | 0.456 | 5.3E-96 | 22 | S100A11 | Immune-B cells |
| 5.42E-100 | -0.3632246 | 0.179 | 0.427 | 1.2E-95 | 22 | DSTN    | Immune-B cells |
| 2.396E-44 | -0.2633225 | 0.265 | 0.43  | 5.3E-40 | 22 | CST3    | Immune-B cells |
| 1.218E-82 | -0.9235608 | 0.043 | 0.244 | 2.7E-78 | 22 | MT1G    | Immune-B cells |
| 1.971E-68 | -0.2611042 | 0.357 | 0.558 | 4.4E-64 | 22 | SRP14   | Immune-B cells |
| 2.527E-86 | -0.3045845 | 0.319 | 0.548 | 5.6E-82 | 22 | MYL6    | Immune-B cells |
| 1.044E-78 | -0.5741467 | 0.096 | 0.305 | 2.3E-74 | 22 | ADIRF   | Immune-B cells |
| 5.209E-78 | -0.2927066 | 0.351 | 0.567 | 1.2E-73 | 22 | CALM2   | Immune-B cells |
| 2.326E-83 | -0.3019828 | 0.323 | 0.537 | 5.1E-79 | 22 | NDUFA4  | Immune-B cells |
| 5.57E-164 | -0.653962  | 0.142 | 0.486 | 1E-159  | 22 | IGFBP7  | Immune-B cells |
| 9.8E-110  | -0.4825038 | 0.182 | 0.441 | 2E-105  | 22 | HSPB1   | Immune-B cells |
| 1.215E-68 | -0.2713671 | 0.502 | 0.675 | 2.7E-64 | 22 | RPL31   | Immune-B cells |
| 1.153E-83 | -0.3058927 | 0.447 | 0.641 | 2.5E-79 | 22 | COX7C   | Immune-B cells |
| 4.9E-47   | -0.5106188 | 0.128 | 0.278 | 1.1E-42 | 22 | MT1X    | Immune-B cells |
| 1.23E-105 | -0.2943129 | 0.818 | 0.934 | 3E-101  | 22 | EEF1A1  | Immune-B cells |
| 4.29E-183 | -0.5163073 | 0.349 | 0.668 | 9E-179  | 22 | ITM2B   | Immune-B cells |
| 5.28E-127 | -1.0573436 | 0.099 | 0.385 | 1E-122  | 22 | SPP1    | Immune-B cells |
| 6.42E-99  | -0.3784728 | 0.608 | 0.804 | 1.4E-94 | 22 | FTH1    | Immune-B cells |

|           |            |       |       |         |    |          |                 |
|-----------|------------|-------|-------|---------|----|----------|-----------------|
| 1.281E-66 | -0.33196   | 0.749 | 0.861 | 2.8E-62 | 22 | TMSB10   | Immune-B cells  |
| 1.01E-118 | -0.7080009 | 0.241 | 0.517 | 2E-114  | 22 | MT2A     | Immune-B cells  |
| 2.66E-228 | -0.7352195 | 0.344 | 0.712 | 6E-224  | 22 | S100A6   | Immune-B cells  |
| 9.53E-240 | -0.685335  | 0.512 | 0.81  | 2E-235  | 22 | MT-ND4L  | Immune-B cells  |
| 4.2E-249  | -0.5962042 | 0.719 | 0.928 | 9E-245  | 22 | MT-ND5   | Immune-B cells  |
| 0         | -0.6505306 | 0.931 | 0.993 | 0       | 22 | MT-CYB   | Immune-B cells  |
| 0         | -0.6233889 | 0.997 | 1     | 0       | 22 | MT-CO2   | Immune-B cells  |
| 0         | -0.6607971 | 0.975 | 0.995 | 0       | 22 | MT-ND2   | Immune-B cells  |
| 0         | -0.8061221 | 0.8   | 0.967 | 0       | 22 | MT-ND1   | Immune-B cells  |
| 0         | -0.722314  | 0.939 | 0.995 | 0       | 22 | MT-ATP6  | Immune-B cells  |
| 0         | -0.7104905 | 0.991 | 1     | 0       | 22 | MT-ND4   | Immune-B cells  |
| 0         | -0.7703079 | 0.991 | 0.999 | 0       | 22 | MT-ND3   | Immune-B cells  |
| 0         | -0.770633  | 0.998 | 1     | 0       | 22 | MT-CO1   | Immune-B cells  |
| 0         | -0.8022792 | 0.995 | 1     | 0       | 22 | MT-CO3   | Immune-B cells  |
| 0         | 0.89579115 | 0.377 | 0.003 | 0       | 23 | LUM      | Mesangial cells |
| 0         | 1.31443115 | 0.701 | 0.014 | 0       | 23 | COL3A1   | Mesangial cells |
| 0         | 1.07552998 | 0.545 | 0.01  | 0       | 23 | COL1A1   | Mesangial cells |
| 0         | 1.33358794 | 0.71  | 0.02  | 0       | 23 | COL1A2   | Mesangial cells |
| 0         | 0.58244563 | 0.402 | 0.007 | 0       | 23 | COL6A3   | Mesangial cells |
| 0         | 0.28084551 | 0.227 | 0.004 | 0       | 23 | THBS2    | Mesangial cells |
| 0         | 1.6399764  | 0.667 | 0.081 | 0       | 23 | FN1      | Mesangial cells |
| 0         | 0.30612043 | 0.285 | 0.007 | 0       | 23 | COL5A2   | Mesangial cells |
| 0         | 0.71545521 | 0.415 | 0.03  | 0       | 23 | DCN      | Mesangial cells |
| 0         | 1.09766111 | 0.714 | 0.08  | 0       | 23 | TAGLN    | Mesangial cells |
| 0         | 2.00145928 | 0.715 | 0.155 | 0       | 23 | MGP      | Mesangial cells |
| 0         | 0.38004378 | 0.314 | 0.013 | 0       | 23 | SULF1    | Mesangial cells |
| 0         | 0.25899656 | 0.246 | 0.007 | 0       | 23 | PCOLCE   | Mesangial cells |
| 0         | 2.14835729 | 0.86  | 0.216 | 0       | 23 | TIMP1    | Mesangial cells |
| 0         | 0.84163861 | 0.618 | 0.062 | 0       | 23 | TPM2     | Mesangial cells |
| 0         | 0.57570148 | 0.354 | 0.025 | 0       | 23 | CCDC80   | Mesangial cells |
| 0         | 0.82189435 | 0.234 | 0.024 | 0       | 23 | TFPI2    | Mesangial cells |
| 0         | 0.47527075 | 0.434 | 0.028 | 0       | 23 | COL6A2   | Mesangial cells |
| 0         | 0.66485365 | 0.409 | 0.038 | 0       | 23 | ACTA2    | Mesangial cells |
| 0         | 0.41579549 | 0.304 | 0.019 | 0       | 23 | SERPINE1 | Mesangial cells |
| 0         | 0.6616188  | 0.517 | 0.052 | 0       | 23 | BGN      | Mesangial cells |
| 0         | 0.26160417 | 0.174 | 0.007 | 0       | 23 | C7       | Mesangial cells |
| 0         | 0.4646135  | 0.251 | 0.018 | 0       | 23 | POSTN    | Mesangial cells |
| 0         | 0.35608151 | 0.33  | 0.019 | 0       | 23 | AEBP1    | Mesangial cells |
| 0         | 0.28637372 | 0.282 | 0.015 | 0       | 23 | LTBP1    | Mesangial cells |
| 0         | 0.94505896 | 0.309 | 0.055 | 0       | 23 | RGS5     | Mesangial cells |
| 0         | 1.01064527 | 0.843 | 0.172 | 0       | 23 | CALD1    | Mesangial cells |
| 0         | 0.37470217 | 0.359 | 0.028 | 0       | 23 | PLAC9    | Mesangial cells |
| 0         | 0.52286083 | 0.269 | 0.031 | 0       | 23 | SERPINE2 | Mesangial cells |
| 0         | 1.6397794  | 0.918 | 0.359 | 0       | 23 | LGALS1   | Mesangial cells |
| 0         | 0.42643721 | 0.409 | 0.046 | 0       | 23 | FSTL1    | Mesangial cells |
| 0         | 0.25659795 | 0.193 | 0.014 | 0       | 23 | NDUFA4L  | Mesangial cells |
| 0         | 0.86949374 | 0.683 | 0.173 | 0       | 23 | SPARC    | Mesangial cells |
| 0         | 0.46380801 | 0.292 | 0.043 | 0       | 23 | HOPX     | Mesangial cells |

|           |            |       |       |         |    |         |                 |
|-----------|------------|-------|-------|---------|----|---------|-----------------|
| 0         | 0.58399987 | 0.596 | 0.114 | 0       | 23 | MYL9    | Mesangial cells |
| 0         | 0.26460822 | 0.195 | 0.017 | 0       | 23 | CTHRC1  | Mesangial cells |
| 0         | 0.27892224 | 0.269 | 0.025 | 0       | 23 | NR2F1   | Mesangial cells |
| 0         | 0.51680756 | 0.358 | 0.063 | 0       | 23 | IGFBP6  | Mesangial cells |
| 0         | 0.25602868 | 0.261 | 0.023 | 0       | 23 | C1R     | Mesangial cells |
| 0         | 0.25437477 | 0.248 | 0.022 | 0       | 23 | C1S     | Mesangial cells |
| 0         | 0.30512154 | 0.314 | 0.035 | 0       | 23 | MAP1B   | Mesangial cells |
| 0         | 0.27584058 | 0.287 | 0.03  | 0       | 23 | MFGE8   | Mesangial cells |
| 0         | 0.35112788 | 0.335 | 0.045 | 0       | 23 | COL6A1  | Mesangial cells |
| 0         | 0.29178644 | 0.236 | 0.027 | 0       | 23 | THY1    | Mesangial cells |
| 0         | 0.37233543 | 0.355 | 0.057 | 0       | 23 | VCAN    | Mesangial cells |
| 0         | 1.18124286 | 0.903 | 0.506 | 0       | 23 | MT2A    | Mesangial cells |
| 0         | 0.42056337 | 0.415 | 0.083 | 0       | 23 | COL4A1  | Mesangial cells |
| 0         | 0.48207002 | 0.492 | 0.133 | 0       | 23 | CTGF    | Mesangial cells |
| 0         | 0.80484827 | 0.777 | 0.36  | 0       | 23 | VIM     | Mesangial cells |
| 0         | 0.37884749 | 0.413 | 0.092 | 0       | 23 | NNMT    | Mesangial cells |
| 0         | 0.43021095 | 0.415 | 0.105 | 0       | 23 | CYR61   | Mesangial cells |
| 0         | 0.32212399 | 0.358 | 0.07  | 0       | 23 | COL4A2  | Mesangial cells |
| 0         | 0.41206817 | 0.497 | 0.133 | 0       | 23 | TPM4    | Mesangial cells |
| 0         | 0.28141933 | 0.312 | 0.059 | 0       | 23 | CALU    | Mesangial cells |
| 0         | 0.28236552 | 0.307 | 0.062 | 0       | 23 | PHLDA1  | Mesangial cells |
| 3.18E-234 | 0.83858006 | 0.79  | 0.476 | 7E-230  | 23 | IGFBP7  | Mesangial cells |
| 1.1E-286  | 0.33464462 | 0.354 | 0.088 | 2E-282  | 23 | CAV1    | Mesangial cells |
| 0         | 0.25395389 | 0.311 | 0.06  | 0       | 23 | PRKCDBP | Mesangial cells |
| 7.36E-239 | 0.4321215  | 0.484 | 0.169 | 2E-234  | 23 | TIMP3   | Mesangial cells |
| 1.33E-280 | 0.40863875 | 0.527 | 0.182 | 3E-276  | 23 | TPM1    | Mesangial cells |
| 1.2E-241  | 0.40616462 | 0.457 | 0.159 | 3E-237  | 23 | EMP3    | Mesangial cells |
| 1.17E-273 | 0.25860418 | 0.301 | 0.069 | 3E-269  | 23 | PRSS23  | Mesangial cells |
| 7.47E-305 | 0.27970504 | 0.374 | 0.094 | 2E-300  | 23 | PTRF    | Mesangial cells |
| 4.43E-291 | 0.43550706 | 0.62  | 0.247 | 1E-286  | 23 | ITGB1   | Mesangial cells |
| 4.85E-143 | 0.37328319 | 0.298 | 0.102 | 1E-138  | 23 | CCL2    | Mesangial cells |
| 4.51E-263 | 0.50870854 | 0.777 | 0.387 | 1E-258  | 23 | IFITM3  | Mesangial cells |
| 6.07E-229 | 0.26324634 | 0.305 | 0.08  | 1E-224  | 23 | IGFBP4  | Mesangial cells |
| 7.4E-157  | 0.32166611 | 0.319 | 0.11  | 2E-152  | 23 | ID3     | Mesangial cells |
| 2.91E-141 | 0.30344083 | 0.273 | 0.093 | 6E-137  | 23 | RPL22L1 | Mesangial cells |
| 4.42E-178 | 0.5558718  | 0.707 | 0.455 | 1E-173  | 23 | GAPDH   | Mesangial cells |
| 3.61E-219 | 0.3050268  | 0.457 | 0.164 | 8E-215  | 23 | SELM    | Mesangial cells |
| 3.67E-115 | 0.41935944 | 0.449 | 0.233 | 8E-111  | 23 | ANXA2   | Mesangial cells |
| 6.2E-152  | 0.29018281 | 0.351 | 0.127 | 1E-147  | 23 | A2M     | Mesangial cells |
| 1.9E-188  | 0.26807519 | 0.387 | 0.136 | 4E-184  | 23 | PPIB    | Mesangial cells |
| 2.93E-104 | 0.36910708 | 0.391 | 0.192 | 6E-100  | 23 | TUBA1B  | Mesangial cells |
| 6.15E-192 | 0.2605105  | 0.403 | 0.14  | 1E-187  | 23 | COX7A1  | Mesangial cells |
| 7.85E-194 | 0.42780098 | 0.722 | 0.419 | 2E-189  | 23 | CD63    | Mesangial cells |
| 4.26E-99  | 0.32713098 | 0.36  | 0.16  | 9.4E-95 | 23 | IGFBP5  | Mesangial cells |
| 3.85E-106 | 0.43899303 | 0.691 | 0.433 | 9E-102  | 23 | HSPB1   | Mesangial cells |
| 9.66E-175 | 0.25913855 | 0.422 | 0.161 | 2E-170  | 23 | ANXA5   | Mesangial cells |
| 1.28E-132 | 0.27134676 | 0.361 | 0.148 | 3E-128  | 23 | TUBB    | Mesangial cells |
| 4.27E-103 | 0.27494872 | 0.316 | 0.132 | 9E-99   | 23 | THBS1   | Mesangial cells |

|           |            |       |       |         |    |          |                   |
|-----------|------------|-------|-------|---------|----|----------|-------------------|
| 1.34E-190 | 0.50234856 | 0.986 | 0.885 | 3E-186  | 23 | TMSB4X   | Mesangial cells   |
| 2.19E-122 | 0.35139213 | 0.688 | 0.434 | 5E-118  | 23 | RPS27L   | Mesangial cells   |
| 4.16E-28  | 0.49867122 | 0.736 | 0.706 | 9.2E-24 | 23 | S100A6   | Mesangial cells   |
| 6.73E-112 | 0.30035993 | 0.686 | 0.42  | 1E-107  | 23 | DSTN     | Mesangial cells   |
| 3.355E-94 | 0.3533705  | 0.712 | 0.522 | 7.4E-90 | 23 | ACTG1    | Mesangial cells   |
| 1.37E-102 | 0.28859367 | 0.609 | 0.381 | 3E-98   | 23 | RPLP0    | Mesangial cells   |
| 2.659E-68 | 0.31221616 | 0.563 | 0.389 | 5.9E-64 | 23 | SEC61G   | Mesangial cells   |
| 3.56E-99  | 0.31439337 | 0.754 | 0.541 | 7.9E-95 | 23 | MYL6     | Mesangial cells   |
| 2.27E-82  | 0.34053222 | 0.84  | 0.699 | 5E-78   | 23 | RPS2     | Mesangial cells   |
| 8.988E-31 | 0.25572913 | 0.326 | 0.22  | 2E-26   | 23 | H2AFZ    | Mesangial cells   |
| 5.236E-96 | 0.34058674 | 0.923 | 0.831 | 1.2E-91 | 23 | ACTB     | Mesangial cells   |
| 2.656E-85 | 0.33126008 | 0.943 | 0.858 | 5.9E-81 | 23 | TMSB10   | Mesangial cells   |
| 2.18E-117 | 0.30972158 | 0.973 | 0.921 | 5E-113  | 23 | RPLP1    | Mesangial cells   |
| 1.015E-91 | 0.26883139 | 0.962 | 0.913 | 2.2E-87 | 23 | RPL10    | Mesangial cells   |
| 3.666E-30 | -0.2509097 | 0.059 | 0.165 | 8.1E-26 | 23 | CXCL14   | Mesangial cells   |
| 4.753E-34 | -0.2740902 | 0.065 | 0.181 | 1.1E-29 | 23 | RGS1     | Mesangial cells   |
| 1.467E-98 | -0.4204371 | 0.096 | 0.347 | 3.2E-94 | 23 | CD24     | Mesangial cells   |
| 1.045E-26 | -0.2690084 | 0.095 | 0.197 | 2.3E-22 | 23 | AIF1     | Mesangial cells   |
| 7.706E-42 | -0.4851732 | 0.048 | 0.177 | 1.7E-37 | 23 | S100A2   | Mesangial cells   |
| 9.171E-25 | -0.2727815 | 0.1   | 0.197 | 2E-20   | 23 | TYROBP   | Mesangial cells   |
| 5.875E-88 | -0.479063  | 0.095 | 0.326 | 1.3E-83 | 23 | FXD2     | Mesangial cells   |
| 1.012E-30 | -0.2841505 | 0.119 | 0.237 | 2.2E-26 | 23 | HLA-DPB1 | Mesangial cells   |
| 1.207E-96 | -0.6972554 | 0.064 | 0.308 | 2.7E-92 | 23 | DEFB1    | Mesangial cells   |
| 3.554E-51 | -0.2528837 | 0.261 | 0.447 | 7.9E-47 | 23 | TXNIP    | Mesangial cells   |
| 2.097E-38 | -0.3371459 | 0.143 | 0.294 | 4.6E-34 | 23 | CLU      | Mesangial cells   |
| 1.905E-13 | -0.2927931 | 0.091 | 0.156 | 4.2E-09 | 23 | LYZ      | Mesangial cells   |
| 3.133E-41 | -0.2807107 | 0.237 | 0.383 | 6.9E-37 | 23 | CYBA     | Mesangial cells   |
| 5.934E-80 | -0.6791328 | 0.08  | 0.296 | 1.3E-75 | 23 | WFDC2    | Mesangial cells   |
| 1.562E-28 | -0.276705  | 0.415 | 0.52  | 3.5E-24 | 23 | DUSP1    | Mesangial cells   |
| 6.574E-80 | -0.3202873 | 0.452 | 0.641 | 1.5E-75 | 23 | COX7C    | Mesangial cells   |
| 1.9E-111  | -0.7938403 | 0.115 | 0.385 | 4E-107  | 23 | ATP1B1   | Mesangial cells   |
| 1.323E-72 | -0.3089061 | 0.849 | 0.926 | 2.9E-68 | 23 | MT-ND5   | Mesangial cells   |
| 2.923E-61 | -0.2864329 | 0.999 | 0.999 | 6.5E-57 | 23 | MT-ND3   | Mesangial cells   |
| 5.14E-60  | -0.4128711 | 0.406 | 0.577 | 1.1E-55 | 23 | SAT1     | Mesangial cells   |
| 6.31E-100 | -0.3965987 | 0.595 | 0.808 | 1.4E-95 | 23 | MT-ND4L  | Mesangial cells   |
| 3.204E-67 | -0.516716  | 0.263 | 0.464 | 7.1E-63 | 23 | CD74     | Mesangial cells   |
| 3.9E-05   | -0.2877161 | 0.849 | 0.787 | 0.8617  | 23 | FTL      | Mesangial cells   |
| 4.924E-72 | -0.3177309 | 1     | 1     | 1.1E-67 | 23 | MT-CO1   | Mesangial cells   |
| 3.406E-79 | -0.33827   | 1     | 1     | 7.5E-75 | 23 | MT-CO3   | Mesangial cells   |
| 1.834E-48 | -0.6293636 | 0.216 | 0.378 | 4.1E-44 | 23 | HLA-DRA  | Mesangial cells   |
| 8.983E-16 | -0.5950749 | 0.158 | 0.242 | 2E-11   | 23 | MT1G     | Mesangial cells   |
| 4.79E-100 | -0.4112107 | 0.946 | 0.964 | 1.1E-95 | 23 | MT-ND1   | Mesangial cells   |
| 4.683E-77 | -0.9873538 | 0.166 | 0.384 | 1E-72   | 23 | SPP1     | Mesangial cells   |
| 1.304E-06 | -1.549828  | 0.137 | 0.181 | 0.0288  | 23 | IGKC     | Mesangial cells   |
| 0         | 0.89918134 | 0.354 | 0.011 | 0       | 24 | FABP4    | Endothelial cells |
| 0         | 1.04656996 | 0.498 | 0.029 | 0       | 24 | RBP7     | Endothelial cells |
| 0         | 1.01033871 | 0.458 | 0.041 | 0       | 24 | CXCL12   | Endothelial cells |
| 0         | 1.00336971 | 0.558 | 0.066 | 0       | 24 | PLPP1    | Endothelial cells |

|          |            |       |       |        |    |          |                   |
|----------|------------|-------|-------|--------|----|----------|-------------------|
| 0        | 0.50445907 | 0.426 | 0.028 | 0      | 24 | KDR      | Endothelial cells |
| 0        | 0.54845519 | 0.462 | 0.035 | 0      | 24 | PLVAP    | Endothelial cells |
| 0        | 0.65032459 | 0.505 | 0.046 | 0      | 24 | COL15A1  | Endothelial cells |
| 0        | 0.78291787 | 0.62  | 0.086 | 0      | 24 | VWF      | Endothelial cells |
| 0        | 0.54410517 | 0.507 | 0.049 | 0      | 24 | ADGRL4   | Endothelial cells |
| 0        | 0.30517324 | 0.276 | 0.015 | 0      | 24 | BTNL9    | Endothelial cells |
| 0        | 0.98720965 | 0.697 | 0.123 | 0      | 24 | A2M      | Endothelial cells |
| 0        | 1.06185842 | 0.674 | 0.129 | 0      | 24 | SPARCL1  | Endothelial cells |
| 0        | 1.17665388 | 0.793 | 0.172 | 0      | 24 | SPARC    | Endothelial cells |
| 0        | 0.74408886 | 0.576 | 0.081 | 0      | 24 | COL4A1   | Endothelial cells |
| 0        | 0.45358631 | 0.412 | 0.039 | 0      | 24 | FLT1     | Endothelial cells |
| 0        | 0.46754945 | 0.282 | 0.029 | 0      | 24 | CD36     | Endothelial cells |
| 0        | 0.87301885 | 0.77  | 0.148 | 0      | 24 | GNG11    | Endothelial cells |
| 0        | 0.69301626 | 0.659 | 0.102 | 0      | 24 | HSPG2    | Endothelial cells |
| 0        | 0.3473063  | 0.353 | 0.029 | 0      | 24 | CDH5     | Endothelial cells |
| 0        | 0.46750534 | 0.473 | 0.053 | 0      | 24 | CALCRL   | Endothelial cells |
| 0        | 0.26518292 | 0.267 | 0.017 | 0      | 24 | SOX18    | Endothelial cells |
| 0        | 0.88066319 | 0.502 | 0.108 | 0      | 24 | RGCC     | Endothelial cells |
| 0        | 0.62273951 | 0.549 | 0.086 | 0      | 24 | CAV1     | Endothelial cells |
| 0        | 0.29894094 | 0.258 | 0.02  | 0      | 24 | EDNRB    | Endothelial cells |
| 0        | 0.39613702 | 0.412 | 0.043 | 0      | 24 | CD34     | Endothelial cells |
| 0        | 0.70450702 | 0.642 | 0.12  | 0      | 24 | TCF4     | Endothelial cells |
| 0        | 0.88389858 | 0.719 | 0.17  | 0      | 24 | IFI27    | Endothelial cells |
| 0        | 0.33403276 | 0.251 | 0.024 | 0      | 24 | ESM1     | Endothelial cells |
| 0        | 0.48119171 | 0.518 | 0.077 | 0      | 24 | EGFL7    | Endothelial cells |
| 0        | 0.71787501 | 0.558 | 0.125 | 0      | 24 | GSN      | Endothelial cells |
| 0        | 0.48195409 | 0.445 | 0.069 | 0      | 24 | SLC9A3R2 | Endothelial cells |
| 0        | 0.51956368 | 0.512 | 0.086 | 0      | 24 | ENG      | Endothelial cells |
| 0        | 0.35267375 | 0.368 | 0.042 | 0      | 24 | TM4SF18  | Endothelial cells |
| 0        | 0.42036433 | 0.439 | 0.06  | 0      | 24 | RAMP2    | Endothelial cells |
| 0        | 0.46386427 | 0.452 | 0.069 | 0      | 24 | COL4A2   | Endothelial cells |
| 0        | 0.34203515 | 0.341 | 0.039 | 0      | 24 | VWA1     | Endothelial cells |
| 0        | 0.38819223 | 0.433 | 0.058 | 0      | 24 | PCAT19   | Endothelial cells |
| 0        | 0.55239715 | 0.545 | 0.104 | 0      | 24 | EPAS1    | Endothelial cells |
| 0        | 0.46562255 | 0.42  | 0.068 | 0      | 24 | PRSS23   | Endothelial cells |
| 0        | 0.4556409  | 0.518 | 0.085 | 0      | 24 | PECAM1   | Endothelial cells |
| 0        | 0.3048266  | 0.324 | 0.036 | 0      | 24 | TMEM88   | Endothelial cells |
| 0        | 0.46886197 | 0.508 | 0.088 | 0      | 24 | EMCN     | Endothelial cells |
| 0        | 0.31276849 | 0.249 | 0.029 | 0      | 24 | ANGPT2   | Endothelial cells |
| 0        | 0.35714911 | 0.37  | 0.05  | 0      | 24 | RAMP3    | Endothelial cells |
| 0        | 0.50781989 | 0.502 | 0.101 | 0      | 24 | SPRY1    | Endothelial cells |
| 0        | 0.55174099 | 0.558 | 0.128 | 0      | 24 | TGFBR2   | Endothelial cells |
| 0        | 0.49799512 | 0.493 | 0.108 | 0      | 24 | ID1      | Endothelial cells |
| 0        | 0.37353763 | 0.428 | 0.073 | 0      | 24 | CD93     | Endothelial cells |
| 0        | 0.2736717  | 0.308 | 0.039 | 0      | 24 | LDB2     | Endothelial cells |
| 0        | 0.28381561 | 0.304 | 0.04  | 0      | 24 | SLCO2A1  | Endothelial cells |
| 3.2E-266 | 0.27350835 | 0.174 | 0.025 | 7E-262 | 24 | IGFBP3   | Endothelial cells |
| 0        | 0.39377548 | 0.488 | 0.106 | 0      | 24 | CCDC85B  | Endothelial cells |

|           |            |       |       |         |    |         |                   |
|-----------|------------|-------|-------|---------|----|---------|-------------------|
| 0         | 0.32678785 | 0.331 | 0.061 | 0       | 24 | PLPP3   | Endothelial cells |
| 0         | 0.49332357 | 0.535 | 0.151 | 0       | 24 | MEF2C   | Endothelial cells |
| 0         | 0.39474994 | 0.442 | 0.108 | 0       | 24 | ID3     | Endothelial cells |
| 0         | 0.28991878 | 0.386 | 0.071 | 0       | 24 | PODXL   | Endothelial cells |
| 1.05E-288 | 0.30465254 | 0.289 | 0.059 | 2E-284  | 24 | CCND1   | Endothelial cells |
| 0         | 0.33230818 | 0.415 | 0.093 | 0       | 24 | PTRF    | Endothelial cells |
| 0         | 0.38671077 | 0.442 | 0.116 | 0       | 24 | TM4SF1  | Endothelial cells |
| 0         | 0.26974053 | 0.332 | 0.061 | 0       | 24 | NPDC1   | Endothelial cells |
| 0         | 0.34185322 | 0.418 | 0.098 | 0       | 24 | NFIB    | Endothelial cells |
| 0         | 0.66779724 | 0.779 | 0.361 | 0       | 24 | VIM     | Endothelial cells |
| 0         | 0.36946231 | 0.429 | 0.112 | 0       | 24 | RDX     | Endothelial cells |
| 0         | 0.31754528 | 0.393 | 0.09  | 0       | 24 | EMP1    | Endothelial cells |
| 0         | 0.51701393 | 0.659 | 0.246 | 0       | 24 | FKBP1A  | Endothelial cells |
| 0         | 0.41463923 | 0.558 | 0.171 | 0       | 24 | VAMP5   | Endothelial cells |
| 0         | 0.39559031 | 0.506 | 0.153 | 0       | 24 | CRIP2   | Endothelial cells |
| 0         | 0.31404106 | 0.4   | 0.099 | 0       | 24 | STOM    | Endothelial cells |
| 0         | 0.27752824 | 0.357 | 0.079 | 0       | 24 | IGFBP4  | Endothelial cells |
| 0         | 0.5804994  | 0.824 | 0.387 | 0       | 24 | IFITM3  | Endothelial cells |
| 1.45E-285 | 0.31349637 | 0.404 | 0.108 | 3E-281  | 24 | SEC14L1 | Endothelial cells |
| 7.11E-245 | 0.62411694 | 0.842 | 0.475 | 2E-240  | 24 | IGFBP7  | Endothelial cells |
| 1.17E-233 | 0.37615679 | 0.496 | 0.17  | 3E-229  | 24 | TIMP3   | Endothelial cells |
| 2.78E-257 | 0.25757828 | 0.352 | 0.088 | 6E-253  | 24 | ADGRF5  | Endothelial cells |
| 2.11E-221 | 0.25241368 | 0.342 | 0.093 | 5E-217  | 24 | GIMAP7  | Endothelial cells |
| 8.95E-189 | 0.25671976 | 0.309 | 0.086 | 2E-184  | 24 | FN1     | Endothelial cells |
| 3.77E-111 | 0.3402078  | 0.284 | 0.105 | 8E-107  | 24 | FABP5   | Endothelial cells |
| 7.44E-202 | 0.27774373 | 0.39  | 0.125 | 2E-197  | 24 | ARHGAP2 | Endothelial cells |
| 2.69E-179 | 0.28845714 | 0.42  | 0.152 | 6E-175  | 24 | SPTBN1  | Endothelial cells |
| 1.2E-130  | 0.31242499 | 0.415 | 0.177 | 3E-126  | 24 | SOCS3   | Endothelial cells |
| 1.18E-157 | 0.25872432 | 0.428 | 0.16  | 3E-153  | 24 | MGP     | Endothelial cells |
| 2.02E-146 | 0.3196212  | 0.555 | 0.264 | 4E-142  | 24 | CD59    | Endothelial cells |
| 1.72E-134 | 0.35864476 | 0.646 | 0.367 | 4E-130  | 24 | POMP    | Endothelial cells |
| 2.26E-126 | 0.25903306 | 0.405 | 0.173 | 5E-122  | 24 | SEPW1   | Endothelial cells |
| 9.81E-139 | 0.28758209 | 0.525 | 0.249 | 2E-134  | 24 | ITGB1   | Endothelial cells |
| 5.23E-126 | 0.32855082 | 0.675 | 0.393 | 1E-121  | 24 | MYL12A  | Endothelial cells |
| 3.24E-118 | 0.28865692 | 0.552 | 0.286 | 7E-114  | 24 | APP     | Endothelial cells |
| 2.31E-176 | 0.48709339 | 0.995 | 0.885 | 5E-172  | 24 | TMSB4X  | Endothelial cells |
| 3.19E-100 | 0.25259283 | 0.507 | 0.264 | 7.1E-96 | 24 | IFITM2  | Endothelial cells |
| 1.041E-96 | 0.28420027 | 0.592 | 0.354 | 2.3E-92 | 24 | CALM1   | Endothelial cells |
| 8.902E-71 | 0.27206465 | 0.59  | 0.365 | 2E-66   | 24 | LGALS1  | Endothelial cells |
| 3.24E-148 | 0.41621953 | 0.993 | 0.95  | 7E-144  | 24 | B2M     | Endothelial cells |
| 7.26E-76  | 0.28522326 | 0.64  | 0.435 | 1.6E-71 | 24 | RPS27L  | Endothelial cells |
| 3.675E-84 | 0.2961904  | 0.75  | 0.541 | 8.1E-80 | 24 | MYL6    | Endothelial cells |
| 1.212E-77 | 0.25052668 | 0.562 | 0.347 | 2.7E-73 | 24 | MYL12B  | Endothelial cells |
| 1.359E-69 | 0.26861036 | 0.636 | 0.428 | 3E-65   | 24 | POLR2L  | Endothelial cells |
| 1.109E-72 | 0.26673935 | 0.729 | 0.52  | 2.4E-68 | 24 | HLA-B   | Endothelial cells |
| 1.29E-110 | 0.32422495 | 0.983 | 0.857 | 3E-106  | 24 | TMSB10  | Endothelial cells |
| 8.659E-77 | 0.28869654 | 0.941 | 0.894 | 1.9E-72 | 24 | RPS19   | Endothelial cells |
| 3.723E-51 | 0.26332311 | 0.807 | 0.7   | 8.2E-47 | 24 | RPS2    | Endothelial cells |

|           |            |       |       |         |    |         |                   |
|-----------|------------|-------|-------|---------|----|---------|-------------------|
| 2.776E-79 | 0.27236664 | 0.887 | 0.801 | 6.1E-75 | 24 | TPT1    | Endothelial cells |
| 3.68E-106 | 0.28587657 | 0.979 | 0.938 | 8E-102  | 24 | PTMA    | Endothelial cells |
| 5.236E-64 | 0.25677715 | 0.967 | 0.923 | 1.2E-59 | 24 | RPS18   | Endothelial cells |
| 7.872E-49 | -0.3208591 | 0.021 | 0.166 | 1.7E-44 | 24 | CXCL14  | Endothelial cells |
| 3.605E-40 | -0.3198266 | 0.032 | 0.16  | 8E-36   | 24 | MMP7    | Endothelial cells |
| 2.167E-59 | -0.3829261 | 0.04  | 0.218 | 4.8E-55 | 24 | CRYAB   | Endothelial cells |
| 9.38E-110 | -0.5428299 | 0.048 | 0.326 | 2E-105  | 24 | FXD2    | Endothelial cells |
| 7.07E-112 | -0.4737872 | 0.064 | 0.347 | 2E-107  | 24 | CD24    | Endothelial cells |
| 3.066E-31 | -0.2502454 | 0.08  | 0.201 | 6.8E-27 | 24 | GPX3    | Endothelial cells |
| 1.208E-40 | -0.3337386 | 0.061 | 0.197 | 2.7E-36 | 24 | AIF1    | Endothelial cells |
| 2.574E-35 | -0.3054005 | 0.07  | 0.197 | 5.7E-31 | 24 | TYROBP  | Endothelial cells |
| 3.229E-46 | -0.3358651 | 0.078 | 0.239 | 7.1E-42 | 24 | MT1E    | Endothelial cells |
| 1.333E-36 | -0.3662894 | 0.061 | 0.191 | 2.9E-32 | 24 | APOE    | Endothelial cells |
| 1.961E-57 | -0.2521249 | 0.19  | 0.39  | 4.3E-53 | 24 | PPDPF   | Endothelial cells |
| 5.75E-38  | -0.4639955 | 0.047 | 0.177 | 1.3E-33 | 24 | S100A2  | Endothelial cells |
| 3.828E-97 | -0.736749  | 0.052 | 0.307 | 8.5E-93 | 24 | DEFB1   | Endothelial cells |
| 3.846E-15 | -0.2765133 | 0.057 | 0.122 | 8.5E-11 | 24 | CCL3    | Endothelial cells |
| 8.572E-33 | -0.2503974 | 0.161 | 0.302 | 1.9E-28 | 24 | S100A4  | Endothelial cells |
| 6.82E-55  | -0.2515072 | 0.242 | 0.447 | 1.5E-50 | 24 | TXNIP   | Endothelial cells |
| 2.664E-25 | -0.3784201 | 0.059 | 0.156 | 5.9E-21 | 24 | LYZ     | Endothelial cells |
| 3.808E-39 | -0.2812527 | 0.179 | 0.334 | 8.4E-35 | 24 | CTSD    | Endothelial cells |
| 9.49E-132 | -0.8861235 | 0.07  | 0.386 | 2E-127  | 24 | ATP1B1  | Endothelial cells |
| 5.074E-31 | -0.2598342 | 0.255 | 0.382 | 1.1E-26 | 24 | CYBA    | Endothelial cells |
| 3.547E-74 | -0.6878711 | 0.077 | 0.296 | 7.8E-70 | 24 | WFDC2   | Endothelial cells |
| 5.536E-37 | -0.3941871 | 0.142 | 0.294 | 1.2E-32 | 24 | CLU     | Endothelial cells |
| 7.508E-27 | -0.2780686 | 0.313 | 0.429 | 1.7E-22 | 24 | CST3    | Endothelial cells |
| 6.603E-52 | -0.5533632 | 0.105 | 0.278 | 1.5E-47 | 24 | MT1X    | Endothelial cells |
| 6.591E-62 | -0.9201481 | 0.057 | 0.243 | 1.5E-57 | 24 | MT1G    | Endothelial cells |
| 2.163E-56 | -0.3415796 | 0.386 | 0.577 | 4.8E-52 | 24 | SAT1    | Endothelial cells |
| 2.882E-39 | -0.2933297 | 0.553 | 0.708 | 6.4E-35 | 24 | S100A6  | Endothelial cells |
| 1.124E-54 | -0.2562637 | 1     | 0.999 | 2.5E-50 | 24 | MT-ND4  | Endothelial cells |
| 3.002E-56 | -0.2864885 | 0.863 | 0.926 | 6.6E-52 | 24 | MT-ND5  | Endothelial cells |
| 3.521E-54 | -0.2861956 | 0.997 | 0.995 | 7.8E-50 | 24 | MT-ND2  | Endothelial cells |
| 9.96E-108 | -0.4419176 | 0.598 | 0.808 | 2E-103  | 24 | MT-ND4L | Endothelial cells |
| 4.149E-70 | -0.3311099 | 1     | 1     | 9.2E-66 | 24 | MT-CO1  | Endothelial cells |
| 5.827E-32 | -0.4819331 | 0.373 | 0.514 | 1.3E-27 | 24 | MT2A    | Endothelial cells |
| 0.0079212 | -0.2996888 | 0.461 | 0.375 | 1       | 24 | HLA-DRA | Endothelial cells |
| 9.801E-90 | -0.4068448 | 0.953 | 0.964 | 2.2E-85 | 24 | MT-ND1  | Endothelial cells |
| 5.456E-68 | -0.4539114 | 0.72  | 0.802 | 1.2E-63 | 24 | FTH1    | Endothelial cells |
| 3.632E-83 | -1.1051337 | 0.146 | 0.384 | 8E-79   | 24 | SPP1    | Endothelial cells |
| 3.6E-111  | -0.4215218 | 1     | 1     | 8E-107  | 24 | MT-CO3  | Endothelial cells |
| 3.9E-110  | -0.4411998 | 0.999 | 0.999 | 9E-106  | 24 | MT-ND3  | Endothelial cells |
| 2.806E-34 | -0.6626675 | 0.731 | 0.788 | 6.2E-30 | 24 | FTL     | Endothelial cells |
| 0.0021902 | -1.3387332 | 0.116 | 0.09  | 1       | 24 | IGLC2   | Endothelial cells |
| 7.291E-06 | -1.6898425 | 0.237 | 0.18  | 0.16109 | 24 | IGKC    | Endothelial cells |
| 0         | 1.27349577 | 0.639 | 0.008 | 0       | 25 | CXCL13  | Immune-NK cells   |
| 0         | 0.42030518 | 0.287 | 0.006 | 0       | 25 | TOP2A   | Immune-NK cells   |
| 0         | 0.27005929 | 0.201 | 0.004 | 0       | 25 | UBE2C   | Immune-NK cells   |

|           |            |       |       |         |    |          |                 |
|-----------|------------|-------|-------|---------|----|----------|-----------------|
| 0         | 0.45208523 | 0.308 | 0.012 | 0       | 25 | KIAA0101 | Immune-NK cells |
| 0         | 0.25157619 | 0.211 | 0.007 | 0       | 25 | NUSAP1   | Immune-NK cells |
| 0         | 0.78519936 | 0.489 | 0.101 | 0       | 25 | HMGB2    | Immune-NK cells |
| 0         | 0.45321516 | 0.352 | 0.042 | 0       | 25 | IFNG     | Immune-NK cells |
| 0         | 0.5004804  | 0.49  | 0.082 | 0       | 25 | CD2      | Immune-NK cells |
| 0         | 0.73372998 | 0.596 | 0.149 | 0       | 25 | CCL5     | Immune-NK cells |
| 0         | 0.71354801 | 0.453 | 0.114 | 0       | 25 | STMN1    | Immune-NK cells |
| 0         | 0.77298115 | 0.628 | 0.173 | 0       | 25 | RGS1     | Immune-NK cells |
| 0         | 0.37581996 | 0.26  | 0.035 | 0       | 25 | GZMB     | Immune-NK cells |
| 0         | 0.33838382 | 0.33  | 0.042 | 0       | 25 | DUSP4    | Immune-NK cells |
| 0         | 0.45031183 | 0.461 | 0.086 | 0       | 25 | CD3D     | Immune-NK cells |
| 0         | 0.44643609 | 0.417 | 0.083 | 0       | 25 | NKG7     | Immune-NK cells |
| 0         | 0.41100286 | 0.344 | 0.067 | 0       | 25 | GZMA     | Immune-NK cells |
| 0         | 0.59807578 | 0.599 | 0.176 | 0       | 25 | CD52     | Immune-NK cells |
| 0         | 0.2786434  | 0.27  | 0.037 | 0       | 25 | AC09258  | Immune-NK cells |
| 0         | 0.3388017  | 0.306 | 0.054 | 0       | 25 | TRBC1    | Immune-NK cells |
| 7.58E-297 | 0.69393803 | 0.573 | 0.217 | 2E-292  | 25 | H2AFZ    | Immune-NK cells |
| 5.09E-259 | 0.73401454 | 0.586 | 0.255 | 1E-254  | 25 | HMGN2    | Immune-NK cells |
| 0         | 0.27678458 | 0.28  | 0.046 | 0       | 25 | TRBC2    | Immune-NK cells |
| 0         | 0.25487463 | 0.263 | 0.041 | 0       | 25 | CD7      | Immune-NK cells |
| 1.68E-296 | 0.37969743 | 0.369 | 0.088 | 4E-292  | 25 | ITM2A    | Immune-NK cells |
| 2.15E-284 | 0.28750347 | 0.28  | 0.053 | 5E-280  | 25 | KLRD1    | Immune-NK cells |
| 4.7E-291  | 0.5477517  | 0.647 | 0.241 | 1E-286  | 25 | CXCR4    | Immune-NK cells |
| 0         | 0.25087681 | 0.274 | 0.047 | 0       | 25 | TRAC     | Immune-NK cells |
| 1.82E-261 | 0.44081359 | 0.477 | 0.146 | 4E-257  | 25 | CD69     | Immune-NK cells |
| 1.2E-277  | 0.32654137 | 0.339 | 0.077 | 3E-273  | 25 | ALOX5AP  | Immune-NK cells |
| 8.39E-269 | 0.31309931 | 0.349 | 0.083 | 2E-264  | 25 | CORO1A   | Immune-NK cells |
| 6.62E-190 | 0.41662343 | 0.401 | 0.129 | 1E-185  | 25 | CCL4     | Immune-NK cells |
| 8.92E-243 | 0.50939094 | 0.622 | 0.252 | 2E-238  | 25 | IL32     | Immune-NK cells |
| 9.2E-223  | 0.34599194 | 0.373 | 0.104 | 2E-218  | 25 | FABP5    | Immune-NK cells |
| 6.22E-250 | 0.38449212 | 0.486 | 0.156 | 1E-245  | 25 | PTPRC    | Immune-NK cells |
| 1.34E-224 | 0.25812659 | 0.268 | 0.059 | 3E-220  | 25 | CKS2     | Immune-NK cells |
| 4.99E-140 | 0.47215077 | 0.43  | 0.192 | 1E-135  | 25 | TUBA1B   | Immune-NK cells |
| 5.078E-65 | 0.61357501 | 0.389 | 0.234 | 1.1E-60 | 25 | HIST1H4C | Immune-NK cells |
| 5.55E-145 | 0.3951238  | 0.378 | 0.149 | 1E-140  | 25 | TUBB     | Immune-NK cells |
| 7.27E-201 | 0.65801485 | 0.756 | 0.506 | 2E-196  | 25 | HMGB1    | Immune-NK cells |
| 2.15E-195 | 0.45072593 | 0.697 | 0.325 | 5E-191  | 25 | SRGN     | Immune-NK cells |
| 1.11E-151 | 0.27870686 | 0.281 | 0.084 | 2E-147  | 25 | PRDM1    | Immune-NK cells |
| 3.51E-172 | 0.34757838 | 0.453 | 0.169 | 8E-168  | 25 | TNFAIP3  | Immune-NK cells |
| 3.41E-179 | 0.31836211 | 0.414 | 0.143 | 8E-175  | 25 | HCST     | Immune-NK cells |
| 3.93E-212 | 0.56690884 | 0.765 | 0.472 | 9E-208  | 25 | PFN1     | Immune-NK cells |
| 5.48E-176 | 0.3274166  | 0.434 | 0.16  | 1E-171  | 25 | IFI16    | Immune-NK cells |
| 5.24E-142 | 0.26298339 | 0.273 | 0.083 | 1E-137  | 25 | PMAIP1   | Immune-NK cells |
| 6.97E-162 | 0.43030388 | 0.638 | 0.332 | 2E-157  | 25 | SH3BGR1  | Immune-NK cells |
| 1.58E-157 | 0.28502311 | 0.375 | 0.132 | 4E-153  | 25 | PPP2R5C  | Immune-NK cells |
| 4.41E-148 | 0.25108009 | 0.33  | 0.11  | 1E-143  | 25 | PSMB9    | Immune-NK cells |
| 4.99E-126 | 0.40122926 | 0.603 | 0.351 | 1E-121  | 25 | SUB1     | Immune-NK cells |
| 9.06E-295 | 0.65938296 | 0.993 | 0.95  | 2E-290  | 25 | B2M      | Immune-NK cells |

|           |            |       |       |         |    |         |                 |
|-----------|------------|-------|-------|---------|----|---------|-----------------|
| 1.19E-105 | 0.34383742 | 0.459 | 0.232 | 3E-101  | 25 | ID2     | Immune-NK cells |
| 6.58E-107 | 0.32305721 | 0.565 | 0.297 | 1E-102  | 25 | S100A4  | Immune-NK cells |
| 9.23E-205 | 0.54341716 | 0.989 | 0.885 | 2E-200  | 25 | TMSB4X  | Immune-NK cells |
| 2.27E-163 | 0.46143267 | 0.885 | 0.691 | 5E-159  | 25 | RPS26   | Immune-NK cells |
| 1.44E-177 | 0.50267572 | 0.954 | 0.831 | 3E-173  | 25 | ACTB    | Immune-NK cells |
| 6.63E-199 | 0.5229259  | 0.984 | 0.938 | 1E-194  | 25 | PTMA    | Immune-NK cells |
| 1.624E-88 | 0.33804114 | 0.626 | 0.393 | 3.6E-84 | 25 | BTG1    | Immune-NK cells |
| 7.19E-144 | 0.40128548 | 0.936 | 0.8   | 2E-139  | 25 | RPL28   | Immune-NK cells |
| 2.22E-181 | 0.43730965 | 0.984 | 0.921 | 5E-177  | 25 | RPLP1   | Immune-NK cells |
| 6.15E-100 | 0.34428609 | 0.82  | 0.634 | 1.4E-95 | 25 | H3F3B   | Immune-NK cells |
| 1.995E-90 | 0.35262464 | 0.858 | 0.699 | 4.4E-86 | 25 | RPS2    | Immune-NK cells |
| 1.721E-63 | 0.32322028 | 0.607 | 0.457 | 3.8E-59 | 25 | GAPDH   | Immune-NK cells |
| 1.26E-107 | 0.34717854 | 0.942 | 0.822 | 3E-103  | 25 | RPS15A  | Immune-NK cells |
| 1.34E-137 | 0.36091006 | 0.985 | 0.941 | 3E-133  | 25 | RPL39   | Immune-NK cells |
| 4.945E-90 | 0.31236522 | 0.892 | 0.751 | 1.1E-85 | 25 | RPL18A  | Immune-NK cells |
| 1.731E-51 | 0.25961481 | 0.549 | 0.389 | 3.8E-47 | 25 | CFL1    | Immune-NK cells |
| 2.23E-119 | 0.3381681  | 0.963 | 0.894 | 5E-115  | 25 | RPS15   | Immune-NK cells |
| 3.93E-106 | 0.31206274 | 0.941 | 0.83  | 9E-102  | 25 | RPLP2   | Immune-NK cells |
| 7.397E-55 | 0.26196728 | 0.721 | 0.589 | 1.6E-50 | 25 | RPS5    | Immune-NK cells |
| 1.646E-93 | 0.28924436 | 0.981 | 0.893 | 3.6E-89 | 25 | RPS19   | Immune-NK cells |
| 6.32E-107 | 0.30180124 | 0.996 | 0.97  | 1E-102  | 25 | RPS27   | Immune-NK cells |
| 1.968E-92 | 0.28383542 | 0.974 | 0.912 | 4.3E-88 | 25 | RPL13A  | Immune-NK cells |
| 3.668E-53 | 0.25259695 | 0.781 | 0.653 | 8.1E-49 | 25 | RPS3    | Immune-NK cells |
| 1.242E-55 | 0.25077554 | 0.855 | 0.755 | 2.7E-51 | 25 | RPS3A   | Immune-NK cells |
| 6.512E-79 | 0.26122717 | 0.987 | 0.947 | 1.4E-74 | 25 | RPL21   | Immune-NK cells |
| 2.392E-45 | -0.2529747 | 0.029 | 0.176 | 5.3E-41 | 25 | TIMP3   | Immune-NK cells |
| 5.009E-42 | -0.3176096 | 0.028 | 0.166 | 1.1E-37 | 25 | CXCL14  | Immune-NK cells |
| 1.504E-51 | -0.3049455 | 0.036 | 0.201 | 3.3E-47 | 25 | GPX3    | Immune-NK cells |
| 6.112E-79 | -0.2714807 | 0.059 | 0.293 | 1.4E-74 | 25 | APP     | Immune-NK cells |
| 1.251E-73 | -0.2568428 | 0.062 | 0.288 | 2.8E-69 | 25 | NGFRAP1 | Immune-NK cells |
| 2.473E-60 | -0.3994333 | 0.033 | 0.218 | 5.5E-56 | 25 | CRYAB   | Immune-NK cells |
| 9.383E-65 | -0.3558175 | 0.045 | 0.248 | 2.1E-60 | 25 | HES1    | Immune-NK cells |
| 2.433E-84 | -0.3246607 | 0.062 | 0.308 | 5.4E-80 | 25 | CD9     | Immune-NK cells |
| 2.86E-111 | -0.5681888 | 0.038 | 0.326 | 6E-107  | 25 | FXYD2   | Immune-NK cells |
| 1.756E-33 | -0.2856865 | 0.039 | 0.16  | 3.9E-29 | 25 | MMP7    | Immune-NK cells |
| 3.139E-47 | -0.5142037 | 0.027 | 0.177 | 6.9E-43 | 25 | S100A2  | Immune-NK cells |
| 3.272E-40 | -0.4628705 | 0.03  | 0.165 | 7.2E-36 | 25 | IGFBP5  | Immune-NK cells |
| 1.61E-103 | -0.4622227 | 0.064 | 0.347 | 4E-99   | 25 | CD24    | Immune-NK cells |
| 6.45E-101 | -0.7507878 | 0.036 | 0.307 | 1.4E-96 | 25 | DEFB1   | Immune-NK cells |
| 2.175E-65 | -0.2790308 | 0.105 | 0.324 | 4.8E-61 | 25 | RHOB    | Immune-NK cells |
| 3.581E-22 | -0.2522756 | 0.055 | 0.147 | 7.9E-18 | 25 | CXCL2   | Immune-NK cells |
| 4.625E-24 | -0.2929722 | 0.045 | 0.139 | 1E-19   | 25 | CTGF    | Immune-NK cells |
| 6.887E-22 | -0.2687026 | 0.049 | 0.138 | 1.5E-17 | 25 | SPARCL1 | Immune-NK cells |
| 1.42E-73  | -0.2791382 | 0.125 | 0.364 | 3.1E-69 | 25 | LAPTM4A | Immune-NK cells |
| 6.224E-57 | -0.2993068 | 0.133 | 0.34  | 1.4E-52 | 25 | PSAP    | Immune-NK cells |
| 2.094E-44 | -0.2680337 | 0.141 | 0.317 | 4.6E-40 | 25 | NPC2    | Immune-NK cells |
| 2.771E-27 | -0.3547089 | 0.057 | 0.165 | 6.1E-23 | 25 | MGP     | Immune-NK cells |
| 1.764E-26 | -0.3101265 | 0.077 | 0.191 | 3.9E-22 | 25 | APOE    | Immune-NK cells |

|           |            |       |       |         |    |         |                 |
|-----------|------------|-------|-------|---------|----|---------|-----------------|
| 5.076E-72 | -0.5303425 | 0.07  | 0.295 | 1.1E-67 | 25 | CLU     | Immune-NK cells |
| 1.418E-88 | -0.4084477 | 0.123 | 0.396 | 3.1E-84 | 25 | IFITM3  | Immune-NK cells |
| 5.71E-113 | -0.4834466 | 0.12  | 0.432 | 1E-108  | 25 | CST3    | Immune-NK cells |
| 5.793E-55 | -0.2650247 | 0.224 | 0.426 | 1.3E-50 | 25 | CD63    | Immune-NK cells |
| 7.01E-36  | -0.2654262 | 0.177 | 0.333 | 1.5E-31 | 25 | CTSD    | Immune-NK cells |
| 4.729E-34 | -0.334443  | 0.102 | 0.238 | 1E-29   | 25 | MT1E    | Immune-NK cells |
| 6.587E-81 | -0.360836  | 0.171 | 0.427 | 1.5E-76 | 25 | DSTN    | Immune-NK cells |
| 1.455E-79 | -0.7188736 | 0.06  | 0.296 | 3.2E-75 | 25 | WFDC2   | Immune-NK cells |
| 7.729E-80 | -0.6543772 | 0.068 | 0.305 | 1.7E-75 | 25 | ADIRF   | Immune-NK cells |
| 3.19E-125 | -0.8712991 | 0.065 | 0.386 | 7E-121  | 25 | ATP1B1  | Immune-NK cells |
| 4.201E-47 | -0.2583932 | 0.254 | 0.447 | 9.3E-43 | 25 | TXNIP   | Immune-NK cells |
| 1.223E-78 | -0.4067143 | 0.148 | 0.402 | 2.7E-74 | 25 | EGR1    | Immune-NK cells |
| 1.272E-43 | -0.2589095 | 0.278 | 0.454 | 2.8E-39 | 25 | S100A11 | Immune-NK cells |
| 2.839E-16 | -0.3286368 | 0.078 | 0.156 | 6.3E-12 | 25 | LYZ     | Immune-NK cells |
| 1.453E-16 | -0.2805246 | 0.135 | 0.227 | 3.2E-12 | 25 | TIMP1   | Immune-NK cells |
| 5.63E-99  | -0.4995788 | 0.155 | 0.44  | 1.2E-94 | 25 | HSPB1   | Immune-NK cells |
| 8.502E-64 | -0.9386529 | 0.046 | 0.243 | 1.9E-59 | 25 | MT1G    | Immune-NK cells |
| 8.56E-149 | -0.7205784 | 0.122 | 0.485 | 2E-144  | 25 | IGFBP7  | Immune-NK cells |
| 9.09E-44  | -0.3280972 | 0.292 | 0.468 | 2E-39   | 25 | HSPA1A  | Immune-NK cells |
| 1.723E-44 | -0.3732023 | 0.407 | 0.577 | 3.8E-40 | 25 | SAT1    | Immune-NK cells |
| 1.44E-140 | -0.5148431 | 0.353 | 0.667 | 3E-136  | 25 | ITM2B   | Immune-NK cells |
| 1.232E-08 | -0.3175712 | 0.432 | 0.461 | 0.00027 | 25 | CD74    | Immune-NK cells |
| 3.817E-15 | -0.4410115 | 0.195 | 0.277 | 8.4E-11 | 25 | MT1X    | Immune-NK cells |
| 9.95E-66  | -0.3374475 | 0.878 | 0.925 | 2.2E-61 | 25 | MT-ND5  | Immune-NK cells |
| 2.344E-27 | -0.3727007 | 0.636 | 0.684 | 5.2E-23 | 25 | FOS     | Immune-NK cells |
| 2.474E-88 | -1.1209011 | 0.119 | 0.384 | 5.5E-84 | 25 | SPP1    | Immune-NK cells |
| 2.416E-95 | -0.3516009 | 0.988 | 0.992 | 5.3E-91 | 25 | MT-CYB  | Immune-NK cells |
| 1.883E-95 | -0.4842558 | 0.676 | 0.806 | 4.2E-91 | 25 | MT-ND4L | Immune-NK cells |
| 6.75E-146 | -0.4181674 | 1     | 1     | 1E-141  | 25 | MT-CO2  | Immune-NK cells |
| 8.8E-134  | -0.4305719 | 0.99  | 0.994 | 2E-129  | 25 | MT-ATP6 | Immune-NK cells |
| 1.437E-89 | -0.51473   | 0.673 | 0.803 | 3.2E-85 | 25 | FTH1    | Immune-NK cells |
| 2.79E-100 | -0.5969726 | 0.519 | 0.709 | 6.2E-96 | 25 | S100A6  | Immune-NK cells |
| 7.47E-150 | -0.4435961 | 0.999 | 0.999 | 2E-145  | 25 | MT-ND4  | Immune-NK cells |
| 5.03E-122 | -0.4566438 | 0.984 | 0.995 | 1E-117  | 25 | MT-ND2  | Immune-NK cells |
| 8.05E-143 | -0.4781305 | 1     | 1     | 2E-138  | 25 | MT-CO1  | Immune-NK cells |
| 3.36E-118 | -0.4945222 | 0.937 | 0.964 | 7E-114  | 25 | MT-ND1  | Immune-NK cells |
| 1.941E-32 | -0.5759087 | 0.718 | 0.788 | 4.3E-28 | 25 | FTL     | Immune-NK cells |
| 1.97E-165 | -0.5618585 | 0.998 | 0.999 | 4E-161  | 25 | MT-ND3  | Immune-NK cells |
| 1.39E-184 | -0.5818413 | 1     | 1     | 3E-180  | 25 | MT-CO3  | Immune-NK cells |
| 2.946E-19 | -0.5027697 | 0.156 | 0.083 | 6.5E-15 | 25 | IGHG3   | Immune-NK cells |
| 6.31E-40  | -1.054147  | 0.18  | 0.079 | 1.4E-35 | 25 | IGLC3   | Immune-NK cells |
| 1.156E-38 | -1.3101315 | 0.194 | 0.089 | 2.6E-34 | 25 | IGLC2   | Immune-NK cells |
| 3.46E-111 | -1.4663656 | 0.427 | 0.178 | 8E-107  | 25 | IGKC    | Immune-NK cells |
| 7.86E-240 | 0.46428991 | 0.772 | 0.299 | 2E-235  | 26 | DEFB1   | Collecting duct |
| 5.5E-183  | 0.4250922  | 0.682 | 0.289 | 1E-178  | 26 | WFDC2   | Collecting duct |
| 1E-215    | 0.28541609 | 0.537 | 0.171 | 2E-211  | 26 | S100A2  | Collecting duct |
| 1.58E-268 | 0.66485565 | 0.993 | 0.803 | 4E-264  | 26 | MT-ND4L | Collecting duct |
| 7.03E-188 | 0.37268502 | 0.822 | 0.377 | 2E-183  | 26 | ATP1B1  | Collecting duct |

|           |            |       |       |         |    |          |                 |
|-----------|------------|-------|-------|---------|----|----------|-----------------|
| 0         | 0.75431392 | 1     | 0.964 | 0       | 26 | MT-ND1   | Collecting duct |
| 1.61E-122 | 0.35456153 | 0.537 | 0.25  | 4E-118  | 26 | MT-ATP8  | Collecting duct |
| 9.35E-112 | 0.2719484  | 0.395 | 0.153 | 2E-107  | 26 | CDH16    | Collecting duct |
| 0         | 0.68781005 | 1     | 1     | 0       | 26 | MT-CO1   | Collecting duct |
| 0         | 0.68345684 | 1     | 1     | 0       | 26 | MT-CO3   | Collecting duct |
| 2.05E-296 | 0.60898965 | 0.997 | 0.924 | 5E-292  | 26 | MT-ND5   | Collecting duct |
| 0         | 0.61967375 | 1     | 0.999 | 0       | 26 | MT-ND4   | Collecting duct |
| 0         | 0.58867153 | 1     | 0.992 | 0       | 26 | MT-CYB   | Collecting duct |
| 0         | 0.58307268 | 1     | 0.994 | 0       | 26 | MT-ATP6  | Collecting duct |
| 2.27E-247 | 0.50231733 | 1     | 0.999 | 5E-243  | 26 | MT-ND3   | Collecting duct |
| 3.27E-289 | 0.49269052 | 1     | 0.995 | 7E-285  | 26 | MT-ND2   | Collecting duct |
| 0         | 0.48805122 | 1     | 1     | 0       | 26 | MT-CO2   | Collecting duct |
| 5.779E-33 | -0.3385603 | 0.002 | 0.117 | 1.3E-28 | 26 | C1QA     | Collecting duct |
| 6.633E-34 | -0.3431924 | 0.003 | 0.122 | 1.5E-29 | 26 | CCL3     | Collecting duct |
| 1.777E-51 | -0.2886676 | 0.008 | 0.184 | 3.9E-47 | 26 | CD52     | Collecting duct |
| 7.098E-36 | -0.3282037 | 0.006 | 0.134 | 1.6E-31 | 26 | CCL4     | Collecting duct |
| 1.511E-43 | -0.4690976 | 0.005 | 0.156 | 3.3E-39 | 26 | LYZ      | Collecting duct |
| 1.153E-43 | -0.3119364 | 0.008 | 0.161 | 2.5E-39 | 26 | FCER1G   | Collecting duct |
| 6.796E-56 | -0.3992087 | 0.009 | 0.198 | 1.5E-51 | 26 | AIF1     | Collecting duct |
| 7.32E-42  | -0.3174866 | 0.009 | 0.157 | 1.6E-37 | 26 | CCL5     | Collecting duct |
| 6.039E-49 | -0.3449985 | 0.011 | 0.181 | 1.3E-44 | 26 | RGS1     | Collecting duct |
| 4.719E-52 | -0.3890294 | 0.016 | 0.197 | 1E-47   | 26 | TYROBP   | Collecting duct |
| 1.075E-66 | -0.3744008 | 0.025 | 0.249 | 2.4E-62 | 26 | CXCR4    | Collecting duct |
| 1.22E-31  | -0.3276155 | 0.018 | 0.14  | 2.7E-27 | 26 | CTGF     | Collecting duct |
| 9.27E-102 | -0.5613176 | 0.026 | 0.333 | 2E-97   | 26 | SRGN     | Collecting duct |
| 9.825E-50 | -0.3226455 | 0.031 | 0.211 | 2.2E-45 | 26 | HLA-DPA1 | Collecting duct |
| 3.396E-30 | -0.3113095 | 0.027 | 0.147 | 7.5E-26 | 26 | CXCL2    | Collecting duct |
| 2.19E-56  | -0.3949119 | 0.037 | 0.237 | 4.8E-52 | 26 | HLA-DPB1 | Collecting duct |
| 2.773E-50 | -0.2536735 | 0.075 | 0.272 | 6.1E-46 | 26 | TSC22D3  | Collecting duct |
| 4.162E-43 | -0.2919698 | 0.055 | 0.224 | 9.2E-39 | 26 | HLA-DRB1 | Collecting duct |
| 4.462E-52 | -0.3199489 | 0.06  | 0.258 | 9.9E-48 | 26 | IL32     | Collecting duct |
| 5.724E-66 | -0.3773781 | 0.067 | 0.301 | 1.3E-61 | 26 | NFKBIA   | Collecting duct |
| 3.75E-100 | -0.5126374 | 0.061 | 0.37  | 8.3E-96 | 26 | VIM      | Collecting duct |
| 1.66E-19  | -0.2893291 | 0.047 | 0.137 | 3.7E-15 | 26 | SPARCL1  | Collecting duct |
| 1.358E-61 | -0.339143  | 0.107 | 0.338 | 3E-57   | 26 | SH3BGR1  | Collecting duct |
| 2.327E-83 | -0.4319778 | 0.102 | 0.383 | 5.1E-79 | 26 | ZFP36    | Collecting duct |
| 4.422E-42 | -0.9321814 | 0.023 | 0.182 | 9.8E-38 | 26 | IGKC     | Collecting duct |
| 8.521E-45 | -0.2909928 | 0.131 | 0.321 | 1.9E-40 | 26 | GPX1     | Collecting duct |
| 2.441E-57 | -0.2888445 | 0.165 | 0.395 | 5.4E-53 | 26 | HLA-C    | Collecting duct |
| 2.581E-50 | -0.3687795 | 0.102 | 0.303 | 5.7E-46 | 26 | S100A4   | Collecting duct |
| 9.281E-60 | -0.3086054 | 0.162 | 0.4   | 2.1E-55 | 26 | MYL12A   | Collecting duct |
| 7.576E-53 | -0.2587301 | 0.235 | 0.466 | 1.7E-48 | 26 | GNB2L1   | Collecting duct |
| 3.834E-57 | -0.3202951 | 0.159 | 0.384 | 8.5E-53 | 26 | JUNB     | Collecting duct |
| 1.387E-32 | -0.284255  | 0.16  | 0.316 | 3.1E-28 | 26 | NPC2     | Collecting duct |
| 2.604E-49 | -0.3262975 | 0.166 | 0.372 | 5.8E-45 | 26 | FOSB     | Collecting duct |
| 3.162E-59 | -0.3626322 | 0.155 | 0.383 | 7E-55   | 26 | CYBA     | Collecting duct |
| 7.09E-53  | -0.2647507 | 0.293 | 0.52  | 1.6E-48 | 26 | RPL23    | Collecting duct |
| 1.812E-55 | -0.3408734 | 0.177 | 0.398 | 4E-51   | 26 | BTG1     | Collecting duct |

|           |            |       |       |         |    |         |                 |
|-----------|------------|-------|-------|---------|----|---------|-----------------|
| 2.182E-50 | -0.257604  | 0.323 | 0.545 | 4.8E-46 | 26 | RPL24   | Collecting duct |
| 3.2E-53   | -0.3028397 | 0.234 | 0.459 | 7.1E-49 | 26 | HLA-A   | Collecting duct |
| 2.694E-65 | -0.3115997 | 0.254 | 0.506 | 6E-61   | 26 | EEF1D   | Collecting duct |
| 1.281E-43 | -0.2553556 | 0.333 | 0.537 | 2.8E-39 | 26 | RPL14   | Collecting duct |
| 1.41E-49  | -0.2616451 | 0.341 | 0.557 | 3.1E-45 | 26 | RPS7    | Collecting duct |
| 1.567E-49 | -0.2699585 | 0.33  | 0.551 | 3.5E-45 | 26 | RPL27   | Collecting duct |
| 6.339E-24 | -0.349808  | 0.105 | 0.227 | 1.4E-19 | 26 | TIMP1   | Collecting duct |
| 6.404E-65 | -0.3189169 | 0.282 | 0.538 | 1.4E-60 | 26 | RPL30   | Collecting duct |
| 3.856E-52 | -0.269618  | 0.37  | 0.591 | 8.5E-48 | 26 | RPL18   | Collecting duct |
| 5.22E-73  | -0.3691189 | 0.219 | 0.478 | 1.2E-68 | 26 | PFN1    | Collecting duct |
| 1.69E-115 | -0.4965233 | 0.181 | 0.527 | 4E-111  | 26 | HLA-B   | Collecting duct |
| 7.366E-47 | -0.2769939 | 0.34  | 0.546 | 1.6E-42 | 26 | MYL6    | Collecting duct |
| 8.636E-48 | -0.2743591 | 0.366 | 0.578 | 1.9E-43 | 26 | RPL10A  | Collecting duct |
| 5.713E-43 | -0.3166298 | 0.24  | 0.433 | 1.3E-38 | 26 | KLF6    | Collecting duct |
| 1.118E-17 | -0.3497927 | 0.096 | 0.19  | 2.5E-13 | 26 | APOE    | Collecting duct |
| 5.044E-26 | -0.2785179 | 0.254 | 0.394 | 1.1E-21 | 26 | IFITM3  | Collecting duct |
| 6.927E-79 | -0.6273128 | 0.106 | 0.37  | 1.5E-74 | 26 | LGALS1  | Collecting duct |
| 1.972E-50 | -0.2827262 | 0.382 | 0.597 | 4.4E-46 | 26 | H3F3A   | Collecting duct |
| 2.037E-11 | -0.3220724 | 0.095 | 0.164 | 4.5E-07 | 26 | MGP     | Collecting duct |
| 4.869E-57 | -0.2983462 | 0.409 | 0.643 | 1.1E-52 | 26 | RPS20   | Collecting duct |
| 2.54E-99  | -0.9561205 | 0.076 | 0.379 | 5.6E-95 | 26 | HLA-DRA | Collecting duct |
| 7.081E-74 | -0.3513532 | 0.325 | 0.593 | 1.6E-69 | 26 | RPS5    | Collecting duct |
| 1.212E-47 | -0.3388393 | 0.27  | 0.467 | 2.7E-43 | 26 | PABPC1  | Collecting duct |
| 4.531E-54 | -0.2835472 | 0.474 | 0.681 | 1E-49   | 26 | FAU     | Collecting duct |
| 3.601E-37 | -0.3459611 | 0.232 | 0.401 | 8E-33   | 26 | EGR1    | Collecting duct |
| 1.882E-51 | -0.2804779 | 0.513 | 0.704 | 4.2E-47 | 26 | RPL19   | Collecting duct |
| 1.275E-77 | -0.3561367 | 0.355 | 0.618 | 2.8E-73 | 26 | RPS16   | Collecting duct |
| 2.209E-44 | -0.3687411 | 0.241 | 0.43  | 4.9E-40 | 26 | CST3    | Collecting duct |
| 1.099E-79 | -0.3532808 | 0.378 | 0.646 | 2.4E-75 | 26 | EIF1    | Collecting duct |
| 5.306E-72 | -0.3411279 | 0.375 | 0.616 | 1.2E-67 | 26 | UBA52   | Collecting duct |
| 4.321E-64 | -0.3178417 | 0.431 | 0.656 | 9.5E-60 | 26 | RPS9    | Collecting duct |
| 7.52E-39  | -0.2784521 | 0.533 | 0.695 | 1.7E-34 | 26 | RPS26   | Collecting duct |
| 1.816E-83 | -0.3640075 | 0.423 | 0.696 | 4E-79   | 26 | RPL9    | Collecting duct |
| 8.577E-44 | -0.3463196 | 0.338 | 0.524 | 1.9E-39 | 26 | JUN     | Collecting duct |
| 1.527E-66 | -0.3395101 | 0.477 | 0.701 | 3.4E-62 | 26 | RPS17   | Collecting duct |
| 1.743E-47 | -0.2544719 | 0.85  | 0.933 | 3.8E-43 | 26 | EEF1A1  | Collecting duct |
| 2.211E-51 | -0.2848887 | 0.681 | 0.831 | 4.9E-47 | 26 | RPS23   | Collecting duct |
| 6.446E-50 | -0.3016189 | 0.651 | 0.812 | 1.4E-45 | 26 | RPL12   | Collecting duct |
| 1.388E-54 | -0.3160072 | 0.577 | 0.754 | 3.1E-50 | 26 | RPS24   | Collecting duct |
| 6.009E-73 | -0.4916987 | 0.26  | 0.521 | 1.3E-68 | 26 | DUSP1   | Collecting duct |
| 9.095E-55 | -0.3270188 | 0.538 | 0.716 | 2E-50   | 26 | RPS4X   | Collecting duct |
| 1.289E-89 | -0.4004563 | 0.423 | 0.687 | 2.8E-85 | 26 | RPL15   | Collecting duct |
| 6.68E-92  | -0.4298815 | 0.378 | 0.657 | 1.5E-87 | 26 | RPS3    | Collecting duct |
| 1.5E-79   | -0.3643025 | 0.559 | 0.798 | 3.3E-75 | 26 | RPS25   | Collecting duct |
| 2.335E-63 | -0.3170435 | 0.691 | 0.858 | 5.2E-59 | 26 | RPL36   | Collecting duct |
| 1.292E-68 | -0.3485381 | 0.582 | 0.775 | 2.9E-64 | 26 | RPL23A  | Collecting duct |
| 6.45E-94  | -0.4565092 | 0.367 | 0.639 | 1.4E-89 | 26 | H3F3B   | Collecting duct |
| 2.543E-85 | -0.3916011 | 0.52  | 0.759 | 5.6E-81 | 26 | RPL35A  | Collecting duct |

|           |            |       |       |         |    |        |                 |
|-----------|------------|-------|-------|---------|----|--------|-----------------|
| 1.328E-72 | -0.339633  | 0.665 | 0.841 | 2.9E-68 | 26 | RPL35  | Collecting duct |
| 3.65E-120 | -0.4785121 | 0.401 | 0.714 | 8E-116  | 26 | RPS13  | Collecting duct |
| 6.11E-102 | -0.4396462 | 0.457 | 0.739 | 1.4E-97 | 26 | RPL27A | Collecting duct |
| 5.195E-26 | -0.5153777 | 0.147 | 0.277 | 1.1E-21 | 26 | MT1X   | Collecting duct |
| 1.531E-65 | -0.3682783 | 0.55  | 0.736 | 3.4E-61 | 26 | RPL3   | Collecting duct |
| 1.782E-82 | -0.3874693 | 0.598 | 0.802 | 3.9E-78 | 26 | RPL11  | Collecting duct |
| 1.576E-84 | -0.3922955 | 0.621 | 0.839 | 3.5E-80 | 26 | RPL26  | Collecting duct |
| 3.694E-74 | -0.3200111 | 0.889 | 0.967 | 8.2E-70 | 26 | RPL41  | Collecting duct |
| 1.5E-106  | -0.4550671 | 0.49  | 0.757 | 3E-102  | 26 | RPL7   | Collecting duct |
| 3.531E-81 | -0.689093  | 0.203 | 0.464 | 7.8E-77 | 26 | CD74   | Collecting duct |
| 2.327E-90 | -0.4223243 | 0.587 | 0.805 | 5.1E-86 | 26 | TPT1   | Collecting duct |
| 4.12E-133 | -0.5361043 | 0.441 | 0.759 | 9E-129  | 26 | RPS3A  | Collecting duct |
| 2.56E-131 | -0.5644264 | 0.39  | 0.705 | 6E-127  | 26 | RPS2   | Collecting duct |
| 1.733E-80 | -0.3885587 | 0.691 | 0.859 | 3.8E-76 | 26 | RPS12  | Collecting duct |
| 7.077E-78 | -0.3985848 | 0.671 | 0.852 | 1.6E-73 | 26 | RPS6   | Collecting duct |
| 1.057E-97 | -0.4414573 | 0.574 | 0.804 | 2.3E-93 | 26 | RPL28  | Collecting duct |
| 1.07E-106 | -0.4152918 | 0.708 | 0.891 | 2E-102  | 26 | RPS28  | Collecting duct |
| 2.45E-102 | -0.453462  | 0.607 | 0.834 | 5.4E-98 | 26 | RPLP2  | Collecting duct |
| 1.25E-147 | -0.5771799 | 0.439 | 0.756 | 3E-143  | 26 | RPL18A | Collecting duct |
| 2.57E-137 | -0.4880853 | 0.657 | 0.882 | 6E-133  | 26 | RPS14  | Collecting duct |
| 9.45E-125 | -0.4639217 | 0.709 | 0.897 | 2E-120  | 26 | RPS15  | Collecting duct |
| 7.65E-143 | -0.574177  | 0.532 | 0.827 | 2E-138  | 26 | RPS15A | Collecting duct |
| 3.05E-108 | -0.4421605 | 0.787 | 0.929 | 7E-104  | 26 | RPS29  | Collecting duct |
| 3.786E-06 | -0.4048802 | 0.483 | 0.513 | 0.08365 | 26 | MT2A   | Collecting duct |
| 5.17E-117 | -0.4785566 | 0.727 | 0.904 | 1E-112  | 26 | RPL32  | Collecting duct |
| 1.53E-124 | -0.4481366 | 0.814 | 0.94  | 3E-120  | 26 | PTMA   | Collecting duct |
| 7.53E-154 | -0.5862318 | 0.584 | 0.862 | 2E-149  | 26 | RPS8   | Collecting duct |
| 3.02E-146 | -0.5004698 | 0.743 | 0.92  | 7E-142  | 26 | RPS27A | Collecting duct |
| 3.05E-141 | -0.5085773 | 0.765 | 0.924 | 7E-137  | 26 | RPLP1  | Collecting duct |
| 2.14E-127 | -0.783826  | 0.374 | 0.686 | 5E-123  | 26 | FOS    | Collecting duct |
| 1.23E-160 | -0.5626361 | 0.699 | 0.915 | 3E-156  | 26 | RPL13A | Collecting duct |
| 2.38E-103 | -0.5790145 | 0.637 | 0.834 | 5E-99   | 26 | ACTB   | Collecting duct |
| 2.57E-171 | -0.581221  | 0.721 | 0.922 | 6E-167  | 26 | RPL13  | Collecting duct |
| 1.45E-160 | -0.6131355 | 0.666 | 0.897 | 3E-156  | 26 | RPS19  | Collecting duct |
| 1.36E-133 | -0.5361698 | 0.81  | 0.925 | 3E-129  | 26 | RPS18  | Collecting duct |
| 9.99E-133 | -0.6942824 | 0.546 | 0.804 | 2E-128  | 26 | FTH1   | Collecting duct |
| 2.54E-194 | -0.6835087 | 0.707 | 0.916 | 6E-190  | 26 | RPL10  | Collecting duct |
| 3.54E-149 | -0.7005836 | 0.664 | 0.861 | 8E-145  | 26 | TMSB10 | Collecting duct |
| 6.82E-179 | -0.6659846 | 0.772 | 0.943 | 2E-174  | 26 | RPL39  | Collecting duct |
| 2.93E-209 | -0.615577  | 0.901 | 0.98  | 6E-205  | 26 | RPL34  | Collecting duct |
| 1.92E-226 | -0.7093263 | 0.758 | 0.95  | 4E-222  | 26 | RPL21  | Collecting duct |
| 3.21E-209 | -0.6898785 | 0.863 | 0.971 | 7E-205  | 26 | RPS27  | Collecting duct |
| 5.4E-113  | -1.0749524 | 0.552 | 0.79  | 1E-108  | 26 | FTL    | Collecting duct |
| 5.41E-262 | -1.238889  | 0.671 | 0.889 | 1E-257  | 26 | TMSB4X | Collecting duct |
| 0         | -1.3433674 | 0.754 | 0.952 | 0       | 26 | B2M    | Collecting duct |
| 0         | 0.87329236 | 0.806 | 0.07  | 0       | 27 | AQP2   | Principal cells |
| 0         | 0.65412442 | 0.715 | 0.091 | 0       | 27 | FXD4   | Principal cells |
| 0         | 0.46220406 | 0.502 | 0.068 | 0       | 27 | AQP3   | Principal cells |

|           |            |       |       |         |    |          |                 |
|-----------|------------|-------|-------|---------|----|----------|-----------------|
| 1.27E-270 | 0.56147766 | 0.841 | 0.289 | 3E-266  | 27 | WFDC2    | Principal cells |
| 2.66E-135 | 0.38774383 | 0.452 | 0.153 | 6E-131  | 27 | CDH16    | Principal cells |
| 0         | 0.79774503 | 0.999 | 0.964 | 0       | 27 | MT-ND1   | Principal cells |
| 1.39E-218 | 0.65781273 | 0.989 | 0.803 | 3E-214  | 27 | MT-ND4L  | Principal cells |
| 4.152E-87 | 0.35948602 | 0.673 | 0.341 | 9.2E-83 | 27 | CD24     | Principal cells |
| 0         | 0.69247372 | 1     | 1     | 0       | 27 | MT-CO1   | Principal cells |
| 4.814E-88 | 0.31244601 | 0.545 | 0.25  | 1.1E-83 | 27 | MT-ATP8  | Principal cells |
| 7.23E-218 | 0.59264503 | 0.999 | 0.924 | 2E-213  | 27 | MT-ND5   | Principal cells |
| 7E-293    | 0.63013685 | 1     | 1     | 2E-288  | 27 | MT-CO3   | Principal cells |
| 6.29E-112 | 0.29095279 | 0.779 | 0.378 | 1E-107  | 27 | ATP1B1   | Principal cells |
| 2.21E-287 | 0.5895872  | 1     | 0.999 | 5E-283  | 27 | MT-ND4   | Principal cells |
| 3.4E-216  | 0.5243794  | 0.999 | 0.992 | 8E-212  | 27 | MT-CYB   | Principal cells |
| 2.16E-218 | 0.51536042 | 0.999 | 0.994 | 5E-214  | 27 | MT-ATP6  | Principal cells |
| 5.01E-221 | 0.46926619 | 1     | 1     | 1E-216  | 27 | MT-CO2   | Principal cells |
| 2.85E-168 | 0.40127795 | 1     | 0.995 | 6E-164  | 27 | MT-ND2   | Principal cells |
| 5.21E-112 | 0.34336833 | 1     | 0.999 | 1E-107  | 27 | MT-ND3   | Principal cells |
| 3.244E-38 | -0.3430403 | 0.007 | 0.18  | 7.2E-34 | 27 | RGS1     | Principal cells |
| 2.314E-27 | -0.3277636 | 0.006 | 0.133 | 5.1E-23 | 27 | CCL4     | Principal cells |
| 4.703E-24 | -0.3349688 | 0.007 | 0.122 | 1E-19   | 27 | CCL3     | Principal cells |
| 4.34E-32  | -0.3091447 | 0.011 | 0.16  | 9.6E-28 | 27 | FCER1G   | Principal cells |
| 1.426E-30 | -0.3126026 | 0.012 | 0.156 | 3.1E-26 | 27 | CCL5     | Principal cells |
| 3.975E-41 | -0.3959615 | 0.012 | 0.197 | 8.8E-37 | 27 | AIF1     | Principal cells |
| 4.618E-36 | -0.2805718 | 0.016 | 0.183 | 1E-31   | 27 | CD52     | Principal cells |
| 5.138E-57 | -0.3043674 | 0.025 | 0.272 | 1.1E-52 | 27 | TSC22D3  | Principal cells |
| 1.636E-31 | -0.4672156 | 0.01  | 0.156 | 3.6E-27 | 27 | LYZ      | Principal cells |
| 9.257E-40 | -0.3923103 | 0.016 | 0.197 | 2E-35   | 27 | TYROBP   | Principal cells |
| 2.643E-21 | -0.3217213 | 0.012 | 0.117 | 5.8E-17 | 27 | C1QA     | Principal cells |
| 2.765E-49 | -0.3651075 | 0.026 | 0.248 | 6.1E-45 | 27 | CXCR4    | Principal cells |
| 1.341E-77 | -0.5636742 | 0.024 | 0.332 | 3E-73   | 27 | SRGN     | Principal cells |
| 6.853E-36 | -0.3152251 | 0.036 | 0.211 | 1.5E-31 | 27 | HLA-DPA1 | Principal cells |
| 3.331E-23 | -0.3409016 | 0.022 | 0.139 | 7.4E-19 | 27 | CTGF     | Principal cells |
| 2.946E-47 | -0.3509176 | 0.041 | 0.258 | 6.5E-43 | 27 | IL32     | Principal cells |
| 2.944E-42 | -0.4372223 | 0.03  | 0.227 | 6.5E-38 | 27 | TIMP1    | Principal cells |
| 3.926E-21 | -0.3167743 | 0.026 | 0.137 | 8.7E-17 | 27 | SPARCL1  | Principal cells |
| 1.182E-81 | -0.5287632 | 0.045 | 0.369 | 2.6E-77 | 27 | VIM      | Principal cells |
| 9.766E-25 | -0.2626477 | 0.047 | 0.182 | 2.2E-20 | 27 | SPARC    | Principal cells |
| 2.853E-32 | -0.291854  | 0.056 | 0.224 | 6.3E-28 | 27 | HLA-DRB1 | Principal cells |
| 2.264E-30 | -0.4044234 | 0.036 | 0.19  | 5E-26   | 27 | APOE     | Principal cells |
| 9.953E-38 | -0.3831281 | 0.051 | 0.236 | 2.2E-33 | 27 | HLA-DPB1 | Principal cells |
| 7.702E-20 | -0.253835  | 0.061 | 0.178 | 1.7E-15 | 27 | IFI27    | Principal cells |
| 3.896E-50 | -0.4168739 | 0.067 | 0.302 | 8.6E-46 | 27 | S100A4   | Principal cells |
| 6.688E-62 | -0.358013  | 0.117 | 0.399 | 1.5E-57 | 27 | MYL12A   | Principal cells |
| 2.778E-40 | -0.3447089 | 0.093 | 0.3   | 6.1E-36 | 27 | NFKBIA   | Principal cells |
| 6.618E-36 | -0.2952467 | 0.123 | 0.321 | 1.5E-31 | 27 | GPX1     | Principal cells |
| 8.685E-38 | -2.139951  | 0.01  | 0.182 | 1.9E-33 | 27 | IGKC     | Principal cells |
| 1.152E-39 | -0.3143828 | 0.128 | 0.337 | 2.5E-35 | 27 | SH3BGR1  | Principal cells |
| 1.052E-35 | -0.2576052 | 0.176 | 0.377 | 2.3E-31 | 27 | OAZ1     | Principal cells |
| 8.779E-45 | -0.3042428 | 0.167 | 0.394 | 1.9E-40 | 27 | HLA-C    | Principal cells |

|           |            |       |       |         |    |        |                 |
|-----------|------------|-------|-------|---------|----|--------|-----------------|
| 9.162E-11 | -0.2648484 | 0.072 | 0.147 | 2E-06   | 27 | CXCL2  | Principal cells |
| 2.709E-51 | -0.3840569 | 0.134 | 0.382 | 6E-47   | 27 | CYBA   | Principal cells |
| 1.261E-70 | -0.6702042 | 0.077 | 0.37  | 2.8E-66 | 27 | LGALS1 | Principal cells |
| 3.682E-27 | -0.2740123 | 0.199 | 0.372 | 8.1E-23 | 27 | FOSB   | Principal cells |
| 6.596E-16 | -0.2885302 | 0.123 | 0.237 | 1.5E-11 | 27 | MT1E   | Principal cells |
| 5.692E-21 | -0.2676008 | 0.177 | 0.316 | 1.3E-16 | 27 | NPC2   | Principal cells |
| 1.301E-37 | -0.3208499 | 0.189 | 0.398 | 2.9E-33 | 27 | BTG1   | Principal cells |
| 3.265E-44 | -0.3162143 | 0.222 | 0.458 | 7.2E-40 | 27 | HLA-A  | Principal cells |
| 1.795E-38 | -0.4271249 | 0.12  | 0.324 | 4E-34   | 27 | FXD2   | Principal cells |
| 1.439E-57 | -0.3395219 | 0.237 | 0.506 | 3.2E-53 | 27 | EEF1D  | Principal cells |
| 2.45E-41  | -0.6056603 | 0.073 | 0.278 | 5.4E-37 | 27 | MT1X   | Principal cells |
| 2.306E-37 | -0.3470622 | 0.179 | 0.382 | 5.1E-33 | 27 | ZFP36  | Principal cells |
| 1.081E-55 | -0.3680049 | 0.215 | 0.478 | 2.4E-51 | 27 | PFN1   | Principal cells |
| 2.814E-36 | -0.2650717 | 0.354 | 0.556 | 6.2E-32 | 27 | RPS7   | Principal cells |
| 2.999E-22 | -0.2814926 | 0.245 | 0.4   | 6.6E-18 | 27 | EGR1   | Principal cells |
| 4.402E-33 | -0.3153924 | 0.238 | 0.433 | 9.7E-29 | 27 | KLF6   | Principal cells |
| 1.111E-39 | -0.2829771 | 0.337 | 0.55  | 2.5E-35 | 27 | RPL27  | Principal cells |
| 1.303E-48 | -0.3210744 | 0.292 | 0.538 | 2.9E-44 | 27 | RPL30  | Principal cells |
| 1.112E-44 | -0.2935972 | 0.373 | 0.616 | 2.5E-40 | 27 | UBA52  | Principal cells |
| 1.336E-80 | -0.4836429 | 0.201 | 0.526 | 3E-76   | 27 | HLA-B  | Principal cells |
| 1.308E-32 | -0.2614905 | 0.469 | 0.66  | 2.9E-28 | 27 | RPL6   | Principal cells |
| 8.988E-25 | -0.2799513 | 0.31  | 0.466 | 2E-20   | 27 | PABPC1 | Principal cells |
| 5.846E-47 | -0.3155938 | 0.341 | 0.577 | 1.3E-42 | 27 | RPL10A | Principal cells |
| 1.677E-43 | -0.298581  | 0.374 | 0.59  | 3.7E-39 | 27 | RPL18  | Principal cells |
| 3.107E-39 | -0.2792319 | 0.474 | 0.695 | 6.9E-35 | 27 | RPL9   | Principal cells |
| 1.9E-55   | -0.4663558 | 0.178 | 0.43  | 4.2E-51 | 27 | CST3   | Principal cells |
| 7.573E-40 | -0.2782244 | 0.476 | 0.681 | 1.7E-35 | 27 | FAU    | Principal cells |
| 2.854E-44 | -0.2843645 | 0.467 | 0.68  | 6.3E-40 | 27 | RPL8   | Principal cells |
| 1.537E-43 | -0.2961121 | 0.426 | 0.642 | 3.4E-39 | 27 | RPS20  | Principal cells |
| 5.334E-47 | -0.3037782 | 0.429 | 0.656 | 1.2E-42 | 27 | RPS9   | Principal cells |
| 7.432E-12 | -0.2526921 | 0.31  | 0.393 | 1.6E-07 | 27 | IFITM3 | Principal cells |
| 2.531E-71 | -0.3933533 | 0.316 | 0.618 | 5.6E-67 | 27 | RPS16  | Principal cells |
| 1.608E-72 | -0.3869662 | 0.341 | 0.646 | 3.6E-68 | 27 | EIF1   | Principal cells |
| 6.161E-38 | -0.2905866 | 0.505 | 0.7   | 1.4E-33 | 27 | RPS17  | Principal cells |
| 5.469E-68 | -0.3999249 | 0.311 | 0.592 | 1.2E-63 | 27 | RPS5   | Principal cells |
| 1.024E-36 | -0.2842839 | 0.529 | 0.703 | 2.3E-32 | 27 | RPL19  | Principal cells |
| 3.474E-31 | -0.278959  | 0.584 | 0.735 | 7.7E-27 | 27 | RPL3   | Principal cells |
| 9.259E-26 | -0.2603787 | 0.702 | 0.811 | 2E-21   | 27 | RPL12  | Principal cells |
| 5.304E-46 | -0.3205228 | 0.489 | 0.686 | 1.2E-41 | 27 | RPL15  | Principal cells |
| 1.78E-38  | -0.2987524 | 0.579 | 0.753 | 3.9E-34 | 27 | RPS24  | Principal cells |
| 1.885E-29 | -0.5433599 | 0.13  | 0.303 | 4.2E-25 | 27 | ADIRF  | Principal cells |
| 1.967E-33 | -0.2632213 | 0.762 | 0.857 | 4.3E-29 | 27 | RPL36  | Principal cells |
| 8.417E-17 | -0.3015796 | 0.409 | 0.519 | 1.9E-12 | 27 | DUSP1  | Principal cells |
| 3.796E-38 | -0.282435  | 0.707 | 0.84  | 8.4E-34 | 27 | RPL35  | Principal cells |
| 8.185E-49 | -0.3236081 | 0.591 | 0.798 | 1.8E-44 | 27 | RPS25  | Principal cells |
| 3.702E-55 | -0.3544013 | 0.519 | 0.758 | 8.2E-51 | 27 | RPL35A | Principal cells |
| 3.739E-71 | -0.4310788 | 0.372 | 0.657 | 8.3E-67 | 27 | RPS3   | Principal cells |
| 5.664E-54 | -0.390516  | 0.403 | 0.638 | 1.3E-49 | 27 | H3F3B  | Principal cells |

|           |            |       |       |         |    |         |                            |
|-----------|------------|-------|-------|---------|----|---------|----------------------------|
| 3.782E-49 | -0.3392921 | 0.567 | 0.774 | 8.4E-45 | 27 | RPL23A  | Principal cells            |
| 1.07E-52  | -0.348592  | 0.583 | 0.802 | 2.4E-48 | 27 | RPL11   | Principal cells            |
| 5.438E-51 | -0.3535167 | 0.557 | 0.756 | 1.2E-46 | 27 | RPL7    | Principal cells            |
| 0.0001617 | -0.2591643 | 0.711 | 0.706 | 1       | 27 | S100A6  | Principal cells            |
| 2.779E-35 | -0.3109668 | 0.717 | 0.851 | 6.1E-31 | 27 | RPS6    | Principal cells            |
| 1.621E-40 | -0.3329511 | 0.65  | 0.803 | 3.6E-36 | 27 | TPT1    | Principal cells            |
| 2.332E-84 | -0.4622999 | 0.421 | 0.713 | 5.2E-80 | 27 | RPS13   | Principal cells            |
| 1.912E-56 | -0.3756324 | 0.641 | 0.838 | 4.2E-52 | 27 | RPL26   | Principal cells            |
| 2.54E-81  | -0.4544735 | 0.469 | 0.738 | 5.6E-77 | 27 | RPL27A  | Principal cells            |
| 2.598E-56 | -0.3446998 | 0.75  | 0.89  | 5.7E-52 | 27 | RPS28   | Principal cells            |
| 4.694E-72 | -0.4483942 | 0.496 | 0.758 | 1E-67   | 27 | RPS3A   | Principal cells            |
| 6.42E-107 | -0.5897415 | 0.366 | 0.704 | 1E-102  | 27 | RPS2    | Principal cells            |
| 4.812E-62 | -0.395319  | 0.681 | 0.859 | 1.1E-57 | 27 | RPS12   | Principal cells            |
| 1.39E-106 | -0.5605186 | 0.425 | 0.755 | 3E-102  | 27 | RPL18A  | Principal cells            |
| 2.065E-62 | -0.4037322 | 0.656 | 0.833 | 4.6E-58 | 27 | RPLP2   | Principal cells            |
| 2.789E-72 | -0.4450794 | 0.583 | 0.803 | 6.2E-68 | 27 | RPL28   | Principal cells            |
| 3.618E-52 | -0.8747157 | 0.145 | 0.378 | 8E-48   | 27 | HLA-DRA | Principal cells            |
| 2.802E-39 | -0.593615  | 0.275 | 0.463 | 6.2E-35 | 27 | CD74    | Principal cells            |
| 8.644E-83 | -0.4288346 | 0.756 | 0.919 | 1.9E-78 | 27 | RPS27A  | Principal cells            |
| 9.05E-102 | -0.482966  | 0.688 | 0.897 | 2E-97   | 27 | RPS15   | Principal cells            |
| 4.155E-80 | -0.4743162 | 0.673 | 0.861 | 9.2E-76 | 27 | RPS8    | Principal cells            |
| 1.267E-81 | -0.451255  | 0.76  | 0.914 | 2.8E-77 | 27 | RPL13A  | Principal cells            |
| 1.7E-121  | -0.5411031 | 0.612 | 0.882 | 4E-117  | 27 | RPS14   | Principal cells            |
| 2.89E-80  | -0.4465743 | 0.782 | 0.929 | 6.4E-76 | 27 | RPS29   | Principal cells            |
| 1.29E-109 | -0.5766077 | 0.549 | 0.826 | 3E-105  | 27 | RPS15A  | Principal cells            |
| 3.978E-86 | -0.4691583 | 0.739 | 0.904 | 8.8E-82 | 27 | RPL32   | Principal cells            |
| 2.55E-88  | -0.4402008 | 0.822 | 0.94  | 5.6E-84 | 27 | PTMA    | Principal cells            |
| 2.546E-52 | -0.7693326 | 0.274 | 0.514 | 5.6E-48 | 27 | MT2A    | Principal cells            |
| 2.639E-56 | -0.5994727 | 0.475 | 0.685 | 5.8E-52 | 27 | FOS     | Principal cells            |
| 1.47E-100 | -0.5036635 | 0.792 | 0.921 | 3.2E-96 | 27 | RPL13   | Principal cells            |
| 2.06E-114 | -0.7308797 | 0.494 | 0.803 | 5E-110  | 27 | FTH1    | Principal cells            |
| 1.74E-129 | -0.5698144 | 0.733 | 0.923 | 4E-125  | 27 | RPLP1   | Principal cells            |
| 1.69E-103 | -0.5485354 | 0.773 | 0.925 | 4E-99   | 27 | RPS18   | Principal cells            |
| 3.68E-81  | -0.5942066 | 0.644 | 0.834 | 8.1E-77 | 27 | ACTB    | Principal cells            |
| 2.42E-140 | -0.6602679 | 0.646 | 0.896 | 5E-136  | 27 | RPS19   | Principal cells            |
| 7.12E-117 | -0.5191646 | 0.934 | 0.979 | 2E-112  | 27 | RPL34   | Principal cells            |
| 9.486E-94 | -0.5600939 | 0.837 | 0.942 | 2.1E-89 | 27 | RPL39   | Principal cells            |
| 4.95E-134 | -0.6518716 | 0.725 | 0.916 | 1E-129  | 27 | RPL10   | Principal cells            |
| 1.6E-134  | -0.6115545 | 0.801 | 0.949 | 4E-130  | 27 | RPL21   | Principal cells            |
| 1.12E-162 | -0.8691025 | 0.577 | 0.861 | 2E-158  | 27 | TMSB10  | Principal cells            |
| 1.91E-148 | -0.6731634 | 0.88  | 0.971 | 4E-144  | 27 | RPS27   | Principal cells            |
| 3.148E-07 | -0.8076504 | 0.183 | 0.241 | 0.00695 | 27 | MT1G    | Principal cells            |
| 7.05E-102 | -1.108844  | 0.518 | 0.79  | 1.6E-97 | 27 | FTL     | Principal cells            |
| 1.99E-112 | -0.9363918 | 0.836 | 0.887 | 4E-108  | 27 | TMSB4X  | Principal cells            |
| 4.44E-251 | -1.3702202 | 0.767 | 0.952 | 1E-246  | 27 | B2M     | Principal cells            |
| 0         | 2.20836384 | 0.897 | 0.02  | 0       | 28 | CCL18   | Immune-Macrophage/monocyte |
| 0         | 1.35592947 | 0.613 | 0.061 | 0       | 28 | HMOX1   | Immune-Macrophage/monocyte |
| 0         | 1.19430277 | 0.735 | 0.084 | 0       | 28 | LGMN    | Immune-Macrophage/monocyte |

|           |            |       |       |        |    |         |                            |
|-----------|------------|-------|-------|--------|----|---------|----------------------------|
| 0         | 1.26434777 | 0.815 | 0.112 | 0      | 28 | C1QA    | Immune-Macrophage/monocyte |
| 0         | 0.94186896 | 0.548 | 0.066 | 0      | 28 | SLC40A1 | Immune-Macrophage/monocyte |
| 0         | 1.00950274 | 0.707 | 0.095 | 0      | 28 | C1QB    | Immune-Macrophage/monocyte |
| 0         | 1.10261696 | 0.529 | 0.084 | 0      | 28 | APOC1   | Immune-Macrophage/monocyte |
| 0         | 0.95794482 | 0.686 | 0.113 | 0      | 28 | CTS2    | Immune-Macrophage/monocyte |
| 0         | 0.62448409 | 0.539 | 0.061 | 0      | 28 | C1QC    | Immune-Macrophage/monocyte |
| 0         | 0.64934648 | 0.572 | 0.07  | 0      | 28 | CD163   | Immune-Macrophage/monocyte |
| 0         | 0.46000743 | 0.344 | 0.031 | 0      | 28 | F13A1   | Immune-Macrophage/monocyte |
| 0         | 0.55903198 | 0.482 | 0.053 | 0      | 28 | CFD     | Immune-Macrophage/monocyte |
| 0         | 0.45155158 | 0.375 | 0.037 | 0      | 28 | PLTP    | Immune-Macrophage/monocyte |
| 0         | 0.60794336 | 0.439 | 0.059 | 0      | 28 | GPNMB   | Immune-Macrophage/monocyte |
| 0         | 0.46156261 | 0.431 | 0.045 | 0      | 28 | MS4A4A  | Immune-Macrophage/monocyte |
| 0         | 0.98547706 | 0.711 | 0.159 | 0      | 28 | CTSB    | Immune-Macrophage/monocyte |
| 8.21E-227 | 1.11066033 | 0.643 | 0.186 | 2E-222 | 28 | APOE    | Immune-Macrophage/monocyte |
| 0         | 0.71124492 | 0.558 | 0.106 | 0      | 28 | CTSL    | Immune-Macrophage/monocyte |
| 0         | 0.46904188 | 0.474 | 0.062 | 0      | 28 | CD14    | Immune-Macrophage/monocyte |
| 1.79E-275 | 0.8090413  | 0.619 | 0.143 | 4E-271 | 28 | RNASE1  | Immune-Macrophage/monocyte |
| 0         | 0.74896981 | 0.693 | 0.15  | 0      | 28 | CTSS    | Immune-Macrophage/monocyte |
| 0         | 0.58567041 | 0.574 | 0.101 | 0      | 28 | MS4A6A  | Immune-Macrophage/monocyte |
| 0         | 0.4962449  | 0.444 | 0.067 | 0      | 28 | STAB1   | Immune-Macrophage/monocyte |
| 0         | 0.33681356 | 0.302 | 0.032 | 0      | 28 | ACP5    | Immune-Macrophage/monocyte |
| 7.65E-286 | 1.20438703 | 0.854 | 0.328 | 2E-281 | 28 | CTSD    | Immune-Macrophage/monocyte |
| 1.42E-291 | 0.37820252 | 0.344 | 0.043 | 3E-287 | 28 | SDC3    | Immune-Macrophage/monocyte |
| 1.18E-246 | 0.81452611 | 0.645 | 0.179 | 3E-242 | 28 | SEPP1   | Immune-Macrophage/monocyte |
| 4.28E-258 | 0.80724399 | 0.693 | 0.198 | 9E-254 | 28 | GLUL    | Immune-Macrophage/monocyte |
| 0         | 0.25831541 | 0.273 | 0.026 | 0      | 28 | SLCO2B1 | Immune-Macrophage/monocyte |
| 1.31E-249 | 0.46072376 | 0.486 | 0.09  | 3E-245 | 28 | S100A9  | Immune-Macrophage/monocyte |
| 1.49E-219 | 0.61890178 | 0.617 | 0.157 | 3E-215 | 28 | FCER1G  | Immune-Macrophage/monocyte |
| 2.02E-210 | 0.47634552 | 0.423 | 0.084 | 4E-206 | 28 | LIPA    | Immune-Macrophage/monocyte |
| 1.68E-251 | 0.94960539 | 0.841 | 0.334 | 4E-247 | 28 | PSAP    | Immune-Macrophage/monocyte |
| 1.29E-296 | 1.88782693 | 0.989 | 0.786 | 3E-292 | 28 | FTL     | Immune-Macrophage/monocyte |
| 2.55E-227 | 0.3633571  | 0.375 | 0.062 | 6E-223 | 28 | CREG1   | Immune-Macrophage/monocyte |
| 6.75E-213 | 0.66266048 | 0.667 | 0.215 | 1E-208 | 28 | SDCBP   | Immune-Macrophage/monocyte |
| 1.05E-180 | 0.90556849 | 0.842 | 0.373 | 2E-176 | 28 | HLA-DRA | Immune-Macrophage/monocyte |
| 1.39E-196 | 0.46790448 | 0.505 | 0.12  | 3E-192 | 28 | LY96    | Immune-Macrophage/monocyte |
| 4.59E-185 | 0.50489837 | 0.524 | 0.139 | 1E-180 | 28 | GRN     | Immune-Macrophage/monocyte |
| 1.79E-202 | 0.27964434 | 0.299 | 0.045 | 4E-198 | 28 | TTYH3   | Immune-Macrophage/monocyte |
| 4.56E-198 | 0.27135842 | 0.299 | 0.045 | 1E-193 | 28 | CD68    | Immune-Macrophage/monocyte |
| 2.62E-175 | 0.52019329 | 0.651 | 0.192 | 6E-171 | 28 | TYROBP  | Immune-Macrophage/monocyte |
| 3.5E-179  | 0.71880726 | 0.756 | 0.312 | 8E-175 | 28 | NPC2    | Immune-Macrophage/monocyte |
| 4.45E-155 | 0.47863671 | 0.49  | 0.137 | 1E-150 | 28 | CTSC    | Immune-Macrophage/monocyte |
| 7.18E-176 | 0.33608779 | 0.381 | 0.078 | 2E-171 | 28 | MFSD1   | Immune-Macrophage/monocyte |
| 3.4E-134  | 0.48463599 | 0.518 | 0.153 | 8E-130 | 28 | LYZ     | Immune-Macrophage/monocyte |
| 4.64E-151 | 0.29707544 | 0.33  | 0.066 | 1E-146 | 28 | MS4A7   | Immune-Macrophage/monocyte |
| 1.57E-133 | 0.37915549 | 0.415 | 0.109 | 3E-129 | 28 | MAFB    | Immune-Macrophage/monocyte |
| 6.73E-134 | 0.30692896 | 0.309 | 0.066 | 1E-129 | 28 | PLD3    | Immune-Macrophage/monocyte |
| 4.5E-152  | 0.27570236 | 0.312 | 0.06  | 1E-147 | 28 | RAP2B   | Immune-Macrophage/monocyte |
| 6.27E-131 | 0.46518266 | 0.585 | 0.193 | 1E-126 | 28 | AIF1    | Immune-Macrophage/monocyte |

|           |            |       |       |         |    |          |                            |
|-----------|------------|-------|-------|---------|----|----------|----------------------------|
| 5.14E-132 | 0.28232169 | 0.323 | 0.07  | 1E-127  | 28 | FCGR3A   | Immune-Macrophage/monocyte |
| 1.156E-81 | 0.33490757 | 0.27  | 0.071 | 2.6E-77 | 28 | CXCL8    | Immune-Macrophage/monocyte |
| 9.44E-115 | 0.34748706 | 0.408 | 0.118 | 2E-110  | 28 | LAPTM5   | Immune-Macrophage/monocyte |
| 1.42E-116 | 0.31994109 | 0.373 | 0.101 | 3E-112  | 28 | BLVRB    | Immune-Macrophage/monocyte |
| 1.17E-118 | 0.35650588 | 0.434 | 0.131 | 3E-114  | 28 | LAMP1    | Immune-Macrophage/monocyte |
| 4.767E-83 | 0.39798353 | 0.418 | 0.145 | 1.1E-78 | 28 | CXCL2    | Immune-Macrophage/monocyte |
| 1.4E-135  | 0.73219737 | 0.886 | 0.573 | 3E-131  | 28 | SAT1     | Immune-Macrophage/monocyte |
| 2.38E-99  | 0.38463488 | 0.45  | 0.157 | 5.2E-95 | 28 | ASAH1    | Immune-Macrophage/monocyte |
| 1.329E-63 | 0.37131948 | 0.312 | 0.106 | 2.9E-59 | 28 | FABP5    | Immune-Macrophage/monocyte |
| 3.49E-109 | 0.25014102 | 0.293 | 0.068 | 8E-105  | 28 | UCP2     | Immune-Macrophage/monocyte |
| 1.485E-98 | 0.49480214 | 0.696 | 0.327 | 3.3E-94 | 28 | SRGN     | Immune-Macrophage/monocyte |
| 2.704E-68 | 0.33708328 | 0.302 | 0.098 | 6E-64   | 28 | NUPR1    | Immune-Macrophage/monocyte |
| 1.1E-67   | 0.27645518 | 0.246 | 0.068 | 2.4E-63 | 28 | CXCL3    | Immune-Macrophage/monocyte |
| 1.328E-92 | 0.35212485 | 0.46  | 0.165 | 2.9E-88 | 28 | MARCKS   | Immune-Macrophage/monocyte |
| 2.129E-93 | 0.50540342 | 0.714 | 0.379 | 4.7E-89 | 28 | CYBA     | Immune-Macrophage/monocyte |
| 1.074E-90 | 0.54509011 | 0.791 | 0.459 | 2.4E-86 | 28 | CD74     | Immune-Macrophage/monocyte |
| 1.26E-147 | 0.78066583 | 0.961 | 0.8   | 3E-143  | 28 | FTH1     | Immune-Macrophage/monocyte |
| 6.34E-79  | 0.36536271 | 0.55  | 0.233 | 1.4E-74 | 28 | HLA-DPB1 | Immune-Macrophage/monocyte |
| 3.246E-66 | 0.45910942 | 0.669 | 0.366 | 7.2E-62 | 28 | LGALS1   | Immune-Macrophage/monocyte |
| 6.985E-68 | 0.29022182 | 0.368 | 0.136 | 1.5E-63 | 28 | DAB2     | Immune-Macrophage/monocyte |
| 1.309E-74 | 0.42799603 | 0.661 | 0.374 | 2.9E-70 | 28 | OAZ1     | Immune-Macrophage/monocyte |
| 9.484E-61 | 0.4055073  | 0.653 | 0.365 | 2.1E-56 | 28 | VIM      | Immune-Macrophage/monocyte |
| 1.837E-45 | 0.41155121 | 0.514 | 0.297 | 4.1E-41 | 28 | TXN      | Immune-Macrophage/monocyte |
| 6.96E-62  | 0.48770237 | 0.754 | 0.517 | 1.5E-57 | 28 | DUSP1    | Immune-Macrophage/monocyte |
| 9.647E-60 | 0.27950419 | 0.395 | 0.156 | 2.1E-55 | 28 | NR4A2    | Immune-Macrophage/monocyte |
| 6.496E-63 | 0.49624381 | 0.875 | 0.682 | 1.4E-58 | 28 | FOS      | Immune-Macrophage/monocyte |
| 3.809E-57 | 0.27309389 | 0.416 | 0.181 | 8.4E-53 | 28 | ARPC5    | Immune-Macrophage/monocyte |
| 3.512E-46 | 0.35586812 | 0.548 | 0.318 | 7.8E-42 | 28 | GPX1     | Immune-Macrophage/monocyte |
| 1.04E-61  | 0.36807744 | 0.706 | 0.426 | 2.3E-57 | 28 | CST3     | Immune-Macrophage/monocyte |
| 1.025E-83 | 0.50647394 | 0.982 | 0.886 | 2.3E-79 | 28 | TMSB4X   | Immune-Macrophage/monocyte |
| 6.138E-69 | 0.45572486 | 0.937 | 0.832 | 1.4E-64 | 28 | ACTB     | Immune-Macrophage/monocyte |
| 3.281E-78 | 0.44974647 | 0.974 | 0.858 | 7.2E-74 | 28 | TMSB10   | Immune-Macrophage/monocyte |
| 4.082E-40 | 0.268331   | 0.441 | 0.236 | 9E-36   | 28 | VAMP8    | Immune-Macrophage/monocyte |
| 8.163E-34 | 0.25046386 | 0.368 | 0.186 | 1.8E-29 | 28 | KLF2     | Immune-Macrophage/monocyte |
| 1.013E-36 | 0.29668953 | 0.605 | 0.379 | 2.2E-32 | 28 | ZFP36    | Immune-Macrophage/monocyte |
| 4.96E-32  | 0.32156935 | 0.582 | 0.4   | 1.1E-27 | 28 | ZFP36L1  | Immune-Macrophage/monocyte |
| 4.197E-30 | 0.25974316 | 0.381 | 0.212 | 9.3E-26 | 28 | CSTB     | Immune-Macrophage/monocyte |
| 3.221E-63 | 0.44464225 | 0.976 | 0.95  | 7.1E-59 | 28 | B2M      | Immune-Macrophage/monocyte |
| 2.093E-25 | 0.33086326 | 0.622 | 0.465 | 4.6E-21 | 28 | HSPA1A   | Immune-Macrophage/monocyte |
| 4.811E-28 | 0.27527269 | 0.473 | 0.305 | 1.1E-23 | 28 | PRDX1    | Immune-Macrophage/monocyte |
| 7.959E-30 | 0.27645195 | 0.558 | 0.369 | 1.8E-25 | 28 | POMP     | Immune-Macrophage/monocyte |
| 1.456E-27 | 0.29868497 | 0.585 | 0.423 | 3.2E-23 | 28 | CD63     | Immune-Macrophage/monocyte |
| 2.776E-21 | 0.2858659  | 0.553 | 0.398 | 6.1E-17 | 28 | EGR1     | Immune-Macrophage/monocyte |
| 5.162E-27 | 0.25982052 | 0.558 | 0.369 | 1.1E-22 | 28 | FOSB     | Immune-Macrophage/monocyte |
| 4.295E-45 | 0.33904125 | 0.897 | 0.802 | 9.5E-41 | 28 | TPT1     | Immune-Macrophage/monocyte |
| 3.711E-24 | 0.25015601 | 0.605 | 0.43  | 8.2E-20 | 28 | KLF6     | Immune-Macrophage/monocyte |
| 7.154E-37 | 0.29998498 | 0.86  | 0.778 | 1.6E-32 | 28 | ATP5E    | Immune-Macrophage/monocyte |
| 2.288E-21 | -0.276763  | 0.023 | 0.165 | 5.1E-17 | 28 | CXCL14   | Immune-Macrophage/monocyte |

|           |            |       |       |         |    |         |                            |
|-----------|------------|-------|-------|---------|----|---------|----------------------------|
| 3.734E-23 | -0.4825524 | 0.016 | 0.164 | 8.2E-19 | 28 | IGFBP5  | Immune-Macrophage/monocyte |
| 2.775E-15 | -0.2756727 | 0.043 | 0.159 | 6.1E-11 | 28 | MMP7    | Immune-Macrophage/monocyte |
| 7.976E-26 | -0.3822119 | 0.043 | 0.217 | 1.8E-21 | 28 | CRYAB   | Immune-Macrophage/monocyte |
| 2.972E-18 | -0.2757819 | 0.061 | 0.2   | 6.6E-14 | 28 | GPX3    | Immune-Macrophage/monocyte |
| 6.614E-42 | -0.4608036 | 0.061 | 0.324 | 1.5E-37 | 28 | FXD2    | Immune-Macrophage/monocyte |
| 2.18E-39  | -0.3716686 | 0.087 | 0.345 | 4.8E-35 | 28 | CD24    | Immune-Macrophage/monocyte |
| 5.507E-15 | -0.3241241 | 0.048 | 0.164 | 1.2E-10 | 28 | MGP     | Immune-Macrophage/monocyte |
| 1.532E-24 | -0.3350442 | 0.071 | 0.246 | 3.4E-20 | 28 | HES1    | Immune-Macrophage/monocyte |
| 6.211E-21 | -0.3379866 | 0.077 | 0.237 | 1.4E-16 | 28 | MT1E    | Immune-Macrophage/monocyte |
| 4.13E-28  | -0.4629186 | 0.087 | 0.293 | 9.1E-24 | 28 | CLU     | Immune-Macrophage/monocyte |
| 5.912E-15 | -0.4329907 | 0.056 | 0.176 | 1.3E-10 | 28 | S100A2  | Immune-Macrophage/monocyte |
| 3.06E-37  | -0.3488743 | 0.17  | 0.425 | 6.8E-33 | 28 | DSTN    | Immune-Macrophage/monocyte |
| 2.073E-32 | -0.5602684 | 0.079 | 0.305 | 4.6E-28 | 28 | DEFB1   | Immune-Macrophage/monocyte |
| 1.117E-37 | -0.307588  | 0.238 | 0.494 | 2.5E-33 | 28 | RPL5    | Immune-Macrophage/monocyte |
| 4.489E-28 | -0.2558197 | 0.322 | 0.544 | 9.9E-24 | 28 | RPL24   | Immune-Macrophage/monocyte |
| 2.356E-30 | -0.2777565 | 0.326 | 0.559 | 5.2E-26 | 28 | RPL29   | Immune-Macrophage/monocyte |
| 4.229E-28 | -0.2733918 | 0.318 | 0.536 | 9.3E-24 | 28 | RPL14   | Immune-Macrophage/monocyte |
| 5.158E-31 | -0.5809925 | 0.088 | 0.303 | 1.1E-26 | 28 | ADIRF   | Immune-Macrophage/monocyte |
| 1.737E-40 | -0.3301428 | 0.289 | 0.556 | 3.8E-36 | 28 | RPS7    | Immune-Macrophage/monocyte |
| 1.502E-29 | -0.6027784 | 0.085 | 0.294 | 3.3E-25 | 28 | WFDC2   | Immune-Macrophage/monocyte |
| 1.364E-35 | -0.3141326 | 0.33  | 0.577 | 3E-31   | 28 | RPL10A  | Immune-Macrophage/monocyte |
| 1.006E-27 | -0.2734014 | 0.418 | 0.632 | 2.2E-23 | 28 | RPL37   | Immune-Macrophage/monocyte |
| 2.892E-28 | -0.2739038 | 0.5   | 0.703 | 6.4E-24 | 28 | RPL19   | Immune-Macrophage/monocyte |
| 7.778E-63 | -0.6870728 | 0.137 | 0.482 | 1.7E-58 | 28 | IGFBP7  | Immune-Macrophage/monocyte |
| 1.488E-24 | -0.264027  | 0.527 | 0.699 | 3.3E-20 | 28 | RPS17   | Immune-Macrophage/monocyte |
| 8.473E-29 | -0.3935664 | 0.23  | 0.438 | 1.9E-24 | 28 | HSPB1   | Immune-Macrophage/monocyte |
| 1.508E-25 | -0.2893725 | 0.473 | 0.655 | 3.3E-21 | 28 | RPS3    | Immune-Macrophage/monocyte |
| 6.488E-27 | -0.2805065 | 0.585 | 0.757 | 1.4E-22 | 28 | RPL35A  | Immune-Macrophage/monocyte |
| 1.328E-22 | -0.2526466 | 0.696 | 0.811 | 2.9E-18 | 28 | RPL12   | Immune-Macrophage/monocyte |
| 3.638E-41 | -0.3517382 | 0.423 | 0.674 | 8E-37   | 28 | RPL31   | Immune-Macrophage/monocyte |
| 1.644E-32 | -0.3108378 | 0.498 | 0.686 | 3.6E-28 | 28 | RPL15   | Immune-Macrophage/monocyte |
| 1.253E-43 | -0.3630758 | 0.423 | 0.66  | 2.8E-39 | 28 | RPL6    | Immune-Macrophage/monocyte |
| 8.326E-10 | -0.4355648 | 0.13  | 0.241 | 1.8E-05 | 28 | MT1G    | Immune-Macrophage/monocyte |
| 3.112E-12 | -0.262188  | 0.757 | 0.805 | 6.9E-08 | 28 | MT-ND4L | Immune-Macrophage/monocyte |
| 2.481E-27 | -0.2708485 | 0.809 | 0.881 | 5.5E-23 | 28 | RPS14   | Immune-Macrophage/monocyte |
| 2.18E-26  | -0.2509312 | 0.998 | 1     | 4.8E-22 | 28 | MT-CO2  | Immune-Macrophage/monocyte |
| 1.425E-43 | -0.3664154 | 0.54  | 0.774 | 3.1E-39 | 28 | RPL23A  | Immune-Macrophage/monocyte |
| 1.937E-25 | -0.2998628 | 0.712 | 0.824 | 4.3E-21 | 28 | RPS15A  | Immune-Macrophage/monocyte |
| 7.37E-50  | -0.40205   | 0.463 | 0.716 | 1.6E-45 | 28 | RPS4X   | Immune-Macrophage/monocyte |
| 3.521E-40 | -0.3395591 | 0.616 | 0.797 | 7.8E-36 | 28 | RPS25   | Immune-Macrophage/monocyte |
| 6.978E-27 | -0.2816978 | 0.881 | 0.913 | 1.5E-22 | 28 | RPL13A  | Immune-Macrophage/monocyte |
| 2.192E-21 | -0.341372  | 0.577 | 0.707 | 4.8E-17 | 28 | S100A6  | Immune-Macrophage/monocyte |
| 4.094E-39 | -0.7573425 | 0.141 | 0.383 | 9E-35   | 28 | ATP1B1  | Immune-Macrophage/monocyte |
| 8.601E-47 | -0.3766883 | 0.603 | 0.801 | 1.9E-42 | 28 | RPL11   | Immune-Macrophage/monocyte |
| 4.124E-20 | -0.2928602 | 1     | 1     | 9.1E-16 | 28 | MT-CO1  | Immune-Macrophage/monocyte |
| 9.906E-18 | -0.2925834 | 0.966 | 0.964 | 2.2E-13 | 28 | MT-ND1  | Immune-Macrophage/monocyte |
| 1.728E-28 | -0.29916   | 0.958 | 0.97  | 3.8E-24 | 28 | RPS27   | Immune-Macrophage/monocyte |
| 1.159E-57 | -0.446729  | 0.489 | 0.735 | 2.6E-53 | 28 | RPL3    | Immune-Macrophage/monocyte |

|           |            |       |       |         |    |          |                            |
|-----------|------------|-------|-------|---------|----|----------|----------------------------|
| 2.313E-37 | -0.3608876 | 0.732 | 0.86  | 5.1E-33 | 28 | RPS8     | Immune-Macrophage/monocyte |
| 1.451E-38 | -0.3391106 | 0.83  | 0.903 | 3.2E-34 | 28 | RPL32    | Immune-Macrophage/monocyte |
| 1.239E-38 | -0.3338687 | 1     | 0.999 | 2.7E-34 | 28 | MT-ND4   | Immune-Macrophage/monocyte |
| 1.065E-68 | -0.4802703 | 0.65  | 0.851 | 2.4E-64 | 28 | RPS6     | Immune-Macrophage/monocyte |
| 7.304E-55 | -0.4221966 | 0.805 | 0.924 | 1.6E-50 | 28 | RPS18    | Immune-Macrophage/monocyte |
| 2.686E-44 | -0.3807611 | 0.984 | 0.992 | 5.9E-40 | 28 | MT-CYB   | Immune-Macrophage/monocyte |
| 6.1E-52   | -0.4294477 | 0.823 | 0.915 | 1.3E-47 | 28 | RPL10    | Immune-Macrophage/monocyte |
| 2.499E-39 | -0.4046564 | 0.987 | 0.995 | 5.5E-35 | 28 | MT-ND2   | Immune-Macrophage/monocyte |
| 1.318E-07 | -0.552333  | 0.278 | 0.381 | 0.00291 | 28 | SPP1     | Immune-Macrophage/monocyte |
| 2.649E-76 | -0.5013643 | 1     | 0.999 | 5.9E-72 | 28 | MALAT1   | Immune-Macrophage/monocyte |
| 4.57E-69  | -0.5393768 | 0.997 | 0.999 | 1E-64   | 28 | MT-ND3   | Immune-Macrophage/monocyte |
| 0.0060207 | -0.5035909 | 0.117 | 0.084 | 1       | 28 | IGHG3    | Immune-Macrophage/monocyte |
| 0.0022837 | -0.4824632 | 0.106 | 0.071 | 1       | 28 | IGHG1    | Immune-Macrophage/monocyte |
| 0.0013893 | -1.285913  | 0.129 | 0.09  | 1       | 28 | IGLC2    | Immune-Macrophage/monocyte |
| 1.56E-05  | -1.4894111 | 0.252 | 0.18  | 0.34462 | 28 | IGKC     | Immune-Macrophage/monocyte |
| 0         | 3.41345431 | 0.469 | 0.029 | 0       | 29 | IGHG4    | Immune-B cells             |
| 0         | 3.96348164 | 1     | 0.075 | 0       | 29 | IGLC3    | Immune-B cells             |
| 0         | 1.06278924 | 0.283 | 0.009 | 0       | 29 | IGLV3-21 | Immune-B cells             |
| 7.65E-294 | 0.45241698 | 0.323 | 0.036 | 2E-289  | 29 | MZB1     | Immune-B cells             |
| 2.41E-116 | 0.44745006 | 0.225 | 0.039 | 5E-112  | 29 | JCHAIN   | Immune-B cells             |
| 9.13E-248 | 0.35885097 | 0.464 | 0.082 | 2E-243  | 29 | IGHG3    | Immune-B cells             |
| 5.78E-248 | 0.27956177 | 0.429 | 0.07  | 1E-243  | 29 | IGHG1    | Immune-B cells             |
| 1.11E-100 | 0.64222369 | 0.591 | 0.264 | 2.5E-96 | 29 | SSR4     | Immune-B cells             |
| 1.07E-56  | 0.35006584 | 0.389 | 0.154 | 2.4E-52 | 29 | CCL5     | Immune-B cells             |
| 1.135E-56 | 0.34257249 | 0.429 | 0.178 | 2.5E-52 | 29 | RGS1     | Immune-B cells             |
| 2.838E-50 | 0.30363211 | 0.331 | 0.133 | 6.3E-46 | 29 | XBP1     | Immune-B cells             |
| 2.999E-46 | 0.30601507 | 0.403 | 0.181 | 6.6E-42 | 29 | CD52     | Immune-B cells             |
| 1.998E-30 | 0.26273627 | 0.29  | 0.132 | 4.4E-26 | 29 | CCL4     | Immune-B cells             |
| 2.552E-38 | 0.30497581 | 0.463 | 0.245 | 5.6E-34 | 29 | CXCR4    | Immune-B cells             |
| 1.099E-44 | 0.28427292 | 0.611 | 0.328 | 2.4E-40 | 29 | SRGN     | Immune-B cells             |
| 6.225E-90 | 0.50512739 | 0.993 | 0.95  | 1.4E-85 | 29 | B2M      | Immune-B cells             |
| 6.746E-32 | 0.27762431 | 0.852 | 0.692 | 1.5E-27 | 29 | RPS26    | Immune-B cells             |
| 8.351E-33 | 0.28738286 | 0.973 | 0.941 | 1.8E-28 | 29 | RPL39    | Immune-B cells             |
| 3.963E-37 | 0.26647513 | 0.978 | 0.922 | 8.8E-33 | 29 | RPLP1    | Immune-B cells             |
| 2.282E-22 | -0.3181384 | 0.017 | 0.165 | 5E-18   | 29 | CXCL14   | Immune-B cells             |
| 5.466E-22 | -0.4750101 | 0.025 | 0.176 | 1.2E-17 | 29 | S100A2   | Immune-B cells             |
| 2.18E-20  | -0.4906525 | 0.025 | 0.164 | 4.8E-16 | 29 | IGFBP5   | Immune-B cells             |
| 3.723E-15 | -0.2847061 | 0.042 | 0.159 | 8.2E-11 | 29 | MMP7     | Immune-B cells             |
| 1.114E-32 | -0.2927085 | 0.082 | 0.306 | 2.5E-28 | 29 | CD9      | Immune-B cells             |
| 1.164E-18 | -0.2794323 | 0.058 | 0.2   | 2.6E-14 | 29 | GPX3     | Immune-B cells             |
| 7.264E-25 | -0.3581304 | 0.058 | 0.237 | 1.6E-20 | 29 | MT1E     | Immune-B cells             |
| 1.232E-21 | -0.3356804 | 0.057 | 0.217 | 2.7E-17 | 29 | CRYAB    | Immune-B cells             |
| 1.239E-41 | -0.4891838 | 0.062 | 0.324 | 2.7E-37 | 29 | FXD2     | Immune-B cells             |
| 1.451E-38 | -0.408117  | 0.092 | 0.345 | 3.2E-34 | 29 | CD24     | Immune-B cells             |
| 3.018E-17 | -0.2775461 | 0.097 | 0.246 | 6.7E-13 | 29 | HES1     | Immune-B cells             |
| 9.097E-23 | -0.2650162 | 0.196 | 0.381 | 2E-18   | 29 | GSTP1    | Immune-B cells             |
| 5.257E-31 | -0.3298791 | 0.198 | 0.425 | 1.2E-26 | 29 | DSTN     | Immune-B cells             |
| 6.959E-33 | -0.6185131 | 0.078 | 0.305 | 1.5E-28 | 29 | DEFB1    | Immune-B cells             |

|           |            |       |       |         |    |          |                   |
|-----------|------------|-------|-------|---------|----|----------|-------------------|
| 6.726E-30 | -0.9344635 | 0.043 | 0.242 | 1.5E-25 | 29 | MT1G     | Immune-B cells    |
| 2.009E-30 | -0.6293641 | 0.078 | 0.294 | 4.4E-26 | 29 | WFDC2    | Immune-B cells    |
| 4.857E-49 | -0.7561832 | 0.085 | 0.383 | 1.1E-44 | 29 | ATP1B1   | Immune-B cells    |
| 1.251E-24 | -0.2739212 | 0.354 | 0.535 | 2.8E-20 | 29 | NDUFA4   | Immune-B cells    |
| 2.079E-29 | -0.3858891 | 0.216 | 0.438 | 4.6E-25 | 29 | HSPB1    | Immune-B cells    |
| 1.135E-15 | -0.3863269 | 0.145 | 0.293 | 2.5E-11 | 29 | CLU      | Immune-B cells    |
| 3.271E-31 | -0.4660837 | 0.238 | 0.482 | 7.2E-27 | 29 | IGFBP7   | Immune-B cells    |
| 3.87E-16  | -0.4754728 | 0.135 | 0.277 | 8.6E-12 | 29 | MT1X     | Immune-B cells    |
| 8.937E-21 | -0.5346996 | 0.133 | 0.303 | 2E-16   | 29 | ADIRF    | Immune-B cells    |
| 2.478E-35 | -0.3714743 | 0.449 | 0.664 | 5.5E-31 | 29 | ITM2B    | Immune-B cells    |
| 5.102E-34 | -0.8635378 | 0.136 | 0.382 | 1.1E-29 | 29 | SPP1     | Immune-B cells    |
| 3.867E-47 | -0.3922335 | 0.79  | 0.925 | 8.5E-43 | 29 | MT-ND5   | Immune-B cells    |
| 6.226E-41 | -0.5089954 | 0.469 | 0.707 | 1.4E-36 | 29 | S100A6   | Immune-B cells    |
| 9.439E-63 | -0.521837  | 0.562 | 0.806 | 2.1E-58 | 29 | MT-ND4L  | Immune-B cells    |
| 2.921E-28 | -0.6431774 | 0.316 | 0.513 | 6.5E-24 | 29 | MT2A     | Immune-B cells    |
| 2.472E-59 | -0.448516  | 0.967 | 0.992 | 5.5E-55 | 29 | MT-CYB   | Immune-B cells    |
| 4.91E-59  | -0.4641499 | 0.985 | 0.995 | 1.1E-54 | 29 | MT-ND2   | Immune-B cells    |
| 5.805E-87 | -0.4755333 | 1     | 1     | 1.3E-82 | 29 | MT-CO2   | Immune-B cells    |
| 8.32E-72  | -0.4908584 | 1     | 1     | 1.8E-67 | 29 | MT-CO1   | Immune-B cells    |
| 1.269E-80 | -0.5018363 | 1     | 0.999 | 2.8E-76 | 29 | MT-ND4   | Immune-B cells    |
| 8.938E-83 | -0.6038543 | 0.85  | 0.965 | 2E-78   | 29 | MT-ND1   | Immune-B cells    |
| 2.261E-69 | -0.5362621 | 0.998 | 0.999 | 5E-65   | 29 | MT-ND3   | Immune-B cells    |
| 1.152E-87 | -0.5613865 | 0.958 | 0.994 | 2.5E-83 | 29 | MT-ATP6  | Immune-B cells    |
| 5.55E-112 | -0.6805446 | 1     | 1     | 1E-107  | 29 | MT-CO3   | Immune-B cells    |
| 0         | -0.2794377 | 0.567 | 0.088 | 0       | 29 | IGLC2    | Immune-B cells    |
| 0         | 1.95248715 | 0.883 | 0.006 | 0       | 30 | SAA1     | Immune-Neutrophil |
| 0         | 0.88782689 | 0.513 | 0.002 | 0       | 30 | SAA2     | Immune-Neutrophil |
| 0         | 0.58868719 | 0.306 | 0.013 | 0       | 30 | LCN2     | Immune-Neutrophil |
| 0         | 1.73302454 | 0.669 | 0.093 | 0       | 30 | SLPI     | Immune-Neutrophil |
| 0         | 1.47972039 | 0.634 | 0.103 | 0       | 30 | SERPINA1 | Immune-Neutrophil |
| 0         | 0.5399245  | 0.469 | 0.032 | 0       | 30 | C3       | Immune-Neutrophil |
| 0         | 0.36230022 | 0.331 | 0.018 | 0       | 30 | SLC34A2  | Immune-Neutrophil |
| 1.11E-255 | 0.65139201 | 0.331 | 0.034 | 2E-251  | 30 | CXCL1    | Immune-Neutrophil |
| 0         | 1.19813175 | 0.807 | 0.156 | 0       | 30 | MMP7     | Immune-Neutrophil |
| 1.54E-301 | 0.52492076 | 0.37  | 0.036 | 3E-297  | 30 | LTF      | Immune-Neutrophil |
| 0         | 0.83114544 | 0.607 | 0.095 | 0       | 30 | NNMT     | Immune-Neutrophil |
| 0         | 0.78555053 | 0.694 | 0.118 | 0       | 30 | PDZK1IP1 | Immune-Neutrophil |
| 4.02E-247 | 0.41298844 | 0.331 | 0.034 | 9E-243  | 30 | S100A1   | Immune-Neutrophil |
| 2.14E-118 | 0.30103171 | 0.207 | 0.027 | 5E-114  | 30 | TFPI2    | Immune-Neutrophil |
| 5.08E-144 | 0.68932046 | 0.697 | 0.214 | 1E-139  | 30 | CRYAB    | Immune-Neutrophil |
| 1.24E-153 | 0.74267468 | 0.818 | 0.29  | 3E-149  | 30 | CLU      | Immune-Neutrophil |
| 2.28E-168 | 0.26019455 | 0.285 | 0.036 | 5E-164  | 30 | CDH6     | Immune-Neutrophil |
| 2.8E-141  | 0.88822171 | 0.876 | 0.379 | 6E-137  | 30 | SPP1     | Immune-Neutrophil |
| 5.63E-120 | 0.65380553 | 0.653 | 0.23  | 1E-115  | 30 | SOD2     | Immune-Neutrophil |
| 5.63E-120 | 0.65380553 | 0.653 | 0.23  | 1E-115  | 30 | SOD2     | Immune-Neutrophil |
| 2.968E-59 | 0.62590053 | 0.409 | 0.145 | 6.6E-55 | 30 | CXCL2    | Immune-Neutrophil |
| 4.92E-116 | 0.28956548 | 0.292 | 0.051 | 1E-111  | 30 | RRAD     | Immune-Neutrophil |
| 2.43E-113 | 0.38559781 | 0.451 | 0.113 | 5E-109  | 30 | TNFSF10  | Immune-Neutrophil |

|           |            |       |       |         |    |          |                   |
|-----------|------------|-------|-------|---------|----|----------|-------------------|
| 3.97E-104 | 0.42056455 | 0.501 | 0.144 | 9E-100  | 30 | KRT18    | Immune-Neutrophil |
| 1.65E-100 | 0.46443387 | 0.57  | 0.186 | 3.6E-96 | 30 | TPM1     | Immune-Neutrophil |
| 5.484E-59 | 0.27502545 | 0.175 | 0.034 | 1.2E-54 | 30 | SERPINE2 | Immune-Neutrophil |
| 7.294E-98 | 0.38152939 | 0.446 | 0.122 | 1.6E-93 | 30 | ELF3     | Immune-Neutrophil |
| 2.191E-80 | 0.36125452 | 0.366 | 0.098 | 4.8E-76 | 30 | MGST1    | Immune-Neutrophil |
| 6.728E-86 | 0.31986772 | 0.34  | 0.082 | 1.5E-81 | 30 | VCAM1    | Immune-Neutrophil |
| 1.827E-80 | 0.30171042 | 0.301 | 0.071 | 4E-76   | 30 | ADAMTS1  | Immune-Neutrophil |
| 1.203E-77 | 0.26951411 | 0.329 | 0.082 | 2.7E-73 | 30 | RARRES2  | Immune-Neutrophil |
| 5.917E-83 | 0.25549457 | 0.336 | 0.081 | 1.3E-78 | 30 | LINC0132 | Immune-Neutrophil |
| 5.131E-82 | 0.28382367 | 0.389 | 0.106 | 1.1E-77 | 30 | KRT8     | Immune-Neutrophil |
| 8.53E-67  | 0.47913728 | 0.72  | 0.342 | 1.9E-62 | 30 | CD24     | Immune-Neutrophil |
| 2.462E-45 | 0.35246275 | 0.338 | 0.122 | 5.4E-41 | 30 | TACSTD2  | Immune-Neutrophil |
| 1.329E-75 | 0.39698178 | 0.706 | 0.291 | 2.9E-71 | 30 | WFDC2    | Immune-Neutrophil |
| 2.072E-57 | 0.30908273 | 0.379 | 0.125 | 4.6E-53 | 30 | PIGR     | Immune-Neutrophil |
| 3.773E-45 | 0.31424085 | 0.31  | 0.104 | 8.3E-41 | 30 | CCL2     | Immune-Neutrophil |
| 2.041E-36 | 0.39674109 | 0.411 | 0.193 | 4.5E-32 | 30 | ATF3     | Immune-Neutrophil |
| 3.812E-64 | 0.33566534 | 0.533 | 0.213 | 8.4E-60 | 30 | S100A13  | Immune-Neutrophil |
| 4.825E-62 | 0.44437498 | 0.784 | 0.45  | 1.1E-57 | 30 | S100A11  | Immune-Neutrophil |
| 1.34E-48  | 0.25229497 | 0.349 | 0.122 | 3E-44   | 30 | SERPING1 | Immune-Neutrophil |
| 2.616E-43 | 0.26171962 | 0.366 | 0.141 | 5.8E-39 | 30 | OCIAD2   | Immune-Neutrophil |
| 3.19E-52  | 0.40309958 | 0.738 | 0.442 | 7E-48   | 30 | HINT1    | Immune-Neutrophil |
| 9.055E-42 | 0.295917   | 0.474 | 0.218 | 2E-37   | 30 | NFKBIZ   | Immune-Neutrophil |
| 1.513E-37 | 0.48150918 | 0.892 | 0.705 | 3.3E-33 | 30 | S100A6   | Immune-Neutrophil |
| 2.979E-26 | 0.30267472 | 0.391 | 0.199 | 6.6E-22 | 30 | ANXA1    | Immune-Neutrophil |
| 1.285E-22 | 0.38025569 | 0.556 | 0.37  | 2.8E-18 | 30 | FOSB     | Immune-Neutrophil |
| 1.149E-35 | 0.25880555 | 0.471 | 0.23  | 2.5E-31 | 30 | ENO1     | Immune-Neutrophil |
| 2.461E-25 | 0.26863976 | 0.471 | 0.255 | 5.4E-21 | 30 | IL32     | Immune-Neutrophil |
| 2.025E-18 | 0.3504915  | 0.6   | 0.431 | 4.5E-14 | 30 | KLF6     | Immune-Neutrophil |
| 3.711E-27 | 0.28537744 | 0.618 | 0.379 | 8.2E-23 | 30 | GSTP1    | Immune-Neutrophil |
| 4.716E-32 | 0.28087315 | 0.634 | 0.383 | 1E-27   | 30 | RPLP0    | Immune-Neutrophil |
| 2.668E-21 | 0.30947906 | 0.593 | 0.398 | 5.9E-17 | 30 | EGR1     | Immune-Neutrophil |
| 1.803E-21 | 0.28023001 | 0.508 | 0.313 | 4E-17   | 30 | IER2     | Immune-Neutrophil |
| 3.535E-38 | 0.36852605 | 0.954 | 0.859 | 7.8E-34 | 30 | TMSB10   | Immune-Neutrophil |
| 9.983E-39 | 0.328324   | 1     | 1     | 2.2E-34 | 30 | MT-CO1   | Immune-Neutrophil |
| 3.1E-35   | 0.30155176 | 0.984 | 0.966 | 6.8E-31 | 30 | RPL41    | Immune-Neutrophil |
| 8.46E-17  | 0.27014758 | 0.924 | 0.86  | 1.9E-12 | 30 | NEAT1    | Immune-Neutrophil |
| 1.221E-23 | 0.25419578 | 1     | 1     | 2.7E-19 | 30 | MT-CO2   | Immune-Neutrophil |
| 2.208E-09 | -0.2669122 | 0.039 | 0.137 | 4.9E-05 | 30 | SPARCL1  | Immune-Neutrophil |
| 4.276E-10 | -0.2628719 | 0.067 | 0.179 | 9.4E-06 | 30 | RGS1     | Immune-Neutrophil |
| 3.427E-10 | -0.2884321 | 0.08  | 0.196 | 7.6E-06 | 30 | AIF1     | Immune-Neutrophil |
| 7.567E-10 | -0.2810322 | 0.083 | 0.196 | 1.7E-05 | 30 | TYROBP   | Immune-Neutrophil |
| 3.467E-20 | -0.3631919 | 0.103 | 0.301 | 7.7E-16 | 30 | S100A4   | Immune-Neutrophil |
| 3.724E-08 | -0.3551171 | 0.062 | 0.155 | 0.00082 | 30 | LYZ      | Immune-Neutrophil |
| 4.28E-21  | -0.3905002 | 0.124 | 0.33  | 9.5E-17 | 30 | SRGN     | Immune-Neutrophil |
| 1.73E-08  | -0.3252808 | 0.087 | 0.19  | 0.00038 | 30 | APOE     | Immune-Neutrophil |
| 1.013E-14 | -0.2645487 | 0.225 | 0.397 | 2.2E-10 | 30 | BTG1     | Immune-Neutrophil |
| 6.905E-05 | -0.2813162 | 0.097 | 0.163 | 1       | 30 | MGP      | Immune-Neutrophil |
| 3.738E-08 | -0.4153954 | 0.069 | 0.163 | 0.00083 | 30 | IGFBP5   | Immune-Neutrophil |

|           |            |       |       |         |    |          |                   |
|-----------|------------|-------|-------|---------|----|----------|-------------------|
| 3.187E-12 | -0.2715299 | 0.326 | 0.466 | 7E-08   | 30 | PABPC1   | Immune-Neutrophil |
| 0.0004288 | -0.5766899 | 0.175 | 0.241 | 1       | 30 | MT1G     | Immune-Neutrophil |
| 6.572E-07 | -0.5171817 | 0.315 | 0.382 | 0.01452 | 30 | ATP1B1   | Immune-Neutrophil |
| 4.64E-19  | -0.4946868 | 0.894 | 0.887 | 1E-14   | 30 | TMSB4X   | Immune-Neutrophil |
| 6.587E-06 | -0.5337271 | 0.745 | 0.788 | 0.14552 | 30 | FTL      | Immune-Neutrophil |
| 0         | 1.57806045 | 0.321 | 0.002 | 0       | 31 | IGHA2    | Immune-B cells    |
| 0         | 4.72249948 | 1     | 0.04  | 0       | 31 | IGHA1    | Immune-B cells    |
| 0         | 2.9317946  | 0.785 | 0.037 | 0       | 31 | JCHAIN   | Immune-B cells    |
| 0         | 0.86424138 | 0.579 | 0.036 | 0       | 31 | MZB1     | Immune-B cells    |
| 9.62E-300 | 2.60227154 | 0.797 | 0.178 | 2E-295  | 31 | IGKC     | Immune-B cells    |
| 2.21E-155 | 2.30589732 | 0.447 | 0.089 | 5E-151  | 31 | IGLC2    | Immune-B cells    |
| 1.4E-136  | 1.99661499 | 0.402 | 0.079 | 3E-132  | 31 | IGLC3    | Immune-B cells    |
| 0         | 0.38239524 | 0.33  | 0.013 | 0       | 31 | TNFRSF17 | Immune-B cells    |
| 2.66E-260 | 0.37891992 | 0.153 | 0.007 | 6E-256  | 31 | IGKV3-20 | Immune-B cells    |
| 0         | 0.31225492 | 0.292 | 0.015 | 0       | 31 | DERL3    | Immune-B cells    |
| 2.81E-160 | 1.00095978 | 0.739 | 0.264 | 6E-156  | 31 | SSR4     | Immune-B cells    |
| 7.18E-195 | 0.33151153 | 0.359 | 0.047 | 2E-190  | 31 | FKBP11   | Immune-B cells    |
| 1.82E-168 | 0.29451803 | 0.28  | 0.034 | 4E-164  | 31 | PIM2     | Immune-B cells    |
| 5.28E-139 | 0.58757639 | 0.531 | 0.132 | 1E-134  | 31 | XBP1     | Immune-B cells    |
| 1.68E-62  | 0.25101731 | 0.263 | 0.064 | 3.7E-58 | 31 | ANKRD28  | Immune-B cells    |
| 4.385E-26 | 0.34773843 | 0.23  | 0.083 | 9.7E-22 | 31 | IGHG3    | Immune-B cells    |
| 1.958E-68 | 0.28989679 | 0.385 | 0.116 | 4.3E-64 | 31 | SPCS3    | Immune-B cells    |
| 2.521E-56 | 0.48056539 | 0.672 | 0.353 | 5.6E-52 | 31 | SUB1     | Immune-B cells    |
| 1.845E-50 | 0.33291158 | 0.467 | 0.194 | 4.1E-46 | 31 | HERPUD1  | Immune-B cells    |
| 4.666E-38 | 0.43406422 | 0.56  | 0.306 | 1E-33   | 31 | HSP90B1  | Immune-B cells    |
| 3.709E-54 | 0.39273129 | 0.725 | 0.379 | 8.2E-50 | 31 | CYBA     | Immune-B cells    |
| 5.721E-16 | 0.26426079 | 0.175 | 0.071 | 1.3E-11 | 31 | IGHG1    | Immune-B cells    |
| 9.774E-42 | 0.29494633 | 0.493 | 0.232 | 2.2E-37 | 31 | SPCS1    | Immune-B cells    |
| 3.481E-40 | 0.3058901  | 0.505 | 0.247 | 7.7E-36 | 31 | SPCS2    | Immune-B cells    |
| 2.539E-37 | 0.37172778 | 0.653 | 0.39  | 5.6E-33 | 31 | SEC61G   | Immune-B cells    |
| 3.656E-33 | 0.26395504 | 0.457 | 0.226 | 8.1E-29 | 31 | SEC61B   | Immune-B cells    |
| 2.114E-29 | 0.25894615 | 0.431 | 0.214 | 4.7E-25 | 31 | BTG2     | Immune-B cells    |
| 9.469E-24 | 0.29344586 | 0.51  | 0.298 | 2.1E-19 | 31 | NFKBIA   | Immune-B cells    |
| 1.568E-50 | 0.40419058 | 1     | 0.95  | 3.5E-46 | 31 | B2M      | Immune-B cells    |
| 1.393E-07 | 0.31166667 | 0.88  | 0.787 | 0.00308 | 31 | FTL      | Immune-B cells    |
| 8.342E-17 | 0.26748795 | 0.852 | 0.683 | 1.8E-12 | 31 | FOS      | Immune-B cells    |
| 2.179E-25 | 0.26748306 | 0.976 | 0.922 | 4.8E-21 | 31 | RPLP1    | Immune-B cells    |
| 1.557E-17 | -0.3434066 | 0.01  | 0.164 | 3.4E-13 | 31 | CXCL14   | Immune-B cells    |
| 1.601E-15 | -0.3476707 | 0.017 | 0.159 | 3.5E-11 | 31 | MMP7     | Immune-B cells    |
| 1.029E-15 | -0.264883  | 0.026 | 0.175 | 2.3E-11 | 31 | TIMP3    | Immune-B cells    |
| 4.12E-22  | -0.4217535 | 0.022 | 0.216 | 9.1E-18 | 31 | CRYAB    | Immune-B cells    |
| 6.525E-30 | -0.3385107 | 0.048 | 0.306 | 1.4E-25 | 31 | CD9      | Immune-B cells    |
| 2.776E-24 | -0.2630231 | 0.065 | 0.291 | 6.1E-20 | 31 | APP      | Immune-B cells    |
| 1.377E-23 | -0.2602393 | 0.065 | 0.286 | 3E-19   | 31 | NGFRAP1  | Immune-B cells    |
| 1.257E-37 | -0.4896631 | 0.043 | 0.345 | 2.8E-33 | 31 | CD24     | Immune-B cells    |
| 1.925E-32 | -0.7783474 | 0.026 | 0.294 | 4.3E-28 | 31 | WFDC2    | Immune-B cells    |
| 4.75E-19  | -0.2620506 | 0.069 | 0.261 | 1E-14   | 31 | ATP1A1   | Immune-B cells    |
| 6.951E-34 | -0.5405963 | 0.043 | 0.324 | 1.5E-29 | 31 | FXD2     | Immune-B cells    |

|           |            |       |       |         |    |          |                |
|-----------|------------|-------|-------|---------|----|----------|----------------|
| 7.236E-14 | -0.2848478 | 0.055 | 0.2   | 1.6E-09 | 31 | GPX3     | Immune-B cells |
| 5.548E-16 | -0.5314338 | 0.026 | 0.176 | 1.2E-11 | 31 | S100A2   | Immune-B cells |
| 3.64E-20  | -0.4015959 | 0.048 | 0.237 | 8E-16   | 31 | MT1E     | Immune-B cells |
| 2.537E-32 | -0.7585565 | 0.036 | 0.305 | 5.6E-28 | 31 | DEFB1    | Immune-B cells |
| 1.335E-13 | -0.4867593 | 0.031 | 0.163 | 3E-09   | 31 | IGFBP5   | Immune-B cells |
| 4.667E-21 | -0.2760721 | 0.108 | 0.322 | 1E-16   | 31 | RHOB     | Immune-B cells |
| 1.199E-16 | -0.3389105 | 0.074 | 0.246 | 2.6E-12 | 31 | HES1     | Immune-B cells |
| 2.653E-20 | -0.2587347 | 0.148 | 0.362 | 5.9E-16 | 31 | LAPTM4A  | Immune-B cells |
| 3.519E-24 | -0.548959  | 0.069 | 0.293 | 7.8E-20 | 31 | CLU      | Immune-B cells |
| 6.326E-40 | -0.8315236 | 0.06  | 0.383 | 1.4E-35 | 31 | ATP1B1   | Immune-B cells |
| 5.087E-24 | -0.6087116 | 0.074 | 0.303 | 1.1E-19 | 31 | ADIRF    | Immune-B cells |
| 6.998E-19 | -0.2851321 | 0.242 | 0.452 | 1.5E-14 | 31 | S100A11  | Immune-B cells |
| 4.769E-19 | -0.3428504 | 0.187 | 0.393 | 1.1E-14 | 31 | IFITM3   | Immune-B cells |
| 3.95E-22  | -0.3461184 | 0.201 | 0.424 | 8.7E-18 | 31 | DSTN     | Immune-B cells |
| 6.512E-49 | -0.7251868 | 0.112 | 0.482 | 1.4E-44 | 31 | IGFBP7   | Immune-B cells |
| 3.048E-33 | -0.5058265 | 0.146 | 0.438 | 6.7E-29 | 31 | HSPB1    | Immune-B cells |
| 1.705E-22 | -0.3047843 | 0.318 | 0.545 | 3.8E-18 | 31 | MYL6     | Immune-B cells |
| 1.519E-19 | -0.2911384 | 0.337 | 0.534 | 3.4E-15 | 31 | NDUFA4   | Immune-B cells |
| 1.226E-15 | -0.4980549 | 0.103 | 0.277 | 2.7E-11 | 31 | MT1X     | Immune-B cells |
| 2.369E-15 | -0.2653137 | 0.395 | 0.564 | 5.2E-11 | 31 | CALM2    | Immune-B cells |
| 3.555E-19 | -0.8711462 | 0.055 | 0.241 | 7.9E-15 | 31 | MT1G     | Immune-B cells |
| 1.044E-22 | -0.3154068 | 0.443 | 0.639 | 2.3E-18 | 31 | COX7C    | Immune-B cells |
| 2.541E-27 | -0.289798  | 0.844 | 0.932 | 5.6E-23 | 31 | EEF1A1   | Immune-B cells |
| 2.587E-49 | -0.5362271 | 0.33  | 0.664 | 5.7E-45 | 31 | ITM2B    | Immune-B cells |
| 2.214E-30 | -1.1041001 | 0.108 | 0.382 | 4.9E-26 | 31 | SPP1     | Immune-B cells |
| 1.194E-24 | -0.6459928 | 0.282 | 0.513 | 2.6E-20 | 31 | MT2A     | Immune-B cells |
| 5.047E-49 | -0.5889592 | 0.545 | 0.806 | 1.1E-44 | 31 | MT-ND4L  | Immune-B cells |
| 5.428E-52 | -0.7393771 | 0.39  | 0.707 | 1.2E-47 | 31 | S100A6   | Immune-B cells |
| 1.159E-52 | -0.5240518 | 0.758 | 0.925 | 2.6E-48 | 31 | MT-ND5   | Immune-B cells |
| 9.786E-61 | -0.5182483 | 0.959 | 0.992 | 2.2E-56 | 31 | MT-CYB   | Immune-B cells |
| 4.079E-65 | -0.5177865 | 0.998 | 1     | 9E-61   | 31 | MT-CO2   | Immune-B cells |
| 2.37E-58  | -0.5395637 | 0.99  | 0.995 | 5.2E-54 | 31 | MT-ND2   | Immune-B cells |
| 5.318E-67 | -0.5942295 | 0.986 | 0.999 | 1.2E-62 | 31 | MT-ND3   | Immune-B cells |
| 1.848E-73 | -0.5921258 | 0.998 | 0.999 | 4.1E-69 | 31 | MT-ND4   | Immune-B cells |
| 1.559E-75 | -0.6365964 | 0.952 | 0.994 | 3.4E-71 | 31 | MT-ATP6  | Immune-B cells |
| 4.065E-65 | -0.6893175 | 0.859 | 0.964 | 9E-61   | 31 | MT-ND1   | Immune-B cells |
| 2.748E-74 | -0.6265269 | 1     | 1     | 6.1E-70 | 31 | MT-CO1   | Immune-B cells |
| 7.906E-78 | -0.6948672 | 0.998 | 1     | 1.7E-73 | 31 | MT-CO3   | Immune-B cells |
| 0         | 1.16529846 | 0.451 | 0.002 | 0       | 32 | IGLL5    | Immune-B cells |
| 0         | 3.5721151  | 0.996 | 0.069 | 0       | 32 | IGHG1    | Immune-B cells |
| 0         | 1.18592918 | 0.227 | 0.007 | 0       | 32 | IGLV6-57 | Immune-B cells |
| 0         | 0.33096389 | 0.114 | 0.001 | 0       | 32 | IGLV1-51 | Immune-B cells |
| 0         | 1.21878282 | 0.777 | 0.036 | 0       | 32 | MZB1     | Immune-B cells |
| 0         | 1.3051003  | 0.535 | 0.039 | 0       | 32 | JCHAIN   | Immune-B cells |
| 1.84E-266 | 1.08197036 | 0.407 | 0.032 | 4E-262  | 32 | IGHGP    | Immune-B cells |
| 6.09E-231 | 2.623729   | 0.857 | 0.179 | 1E-226  | 32 | IGKC     | Immune-B cells |
| 1.59E-175 | 1.90504519 | 0.535 | 0.083 | 4E-171  | 32 | IGHG3    | Immune-B cells |
| 3.15E-224 | 0.38537197 | 0.194 | 0.009 | 7E-220  | 32 | IGLV3-1  | Immune-B cells |

|           |            |       |       |         |    |          |                |
|-----------|------------|-------|-------|---------|----|----------|----------------|
| 0         | 0.36544906 | 0.319 | 0.015 | 0       | 32 | DERL3    | Immune-B cells |
| 0         | 0.33048106 | 0.304 | 0.013 | 0       | 32 | TNFRSF17 | Immune-B cells |
| 2.99E-279 | 1.16205637 | 0.81  | 0.132 | 7E-275  | 32 | XBP1     | Immune-B cells |
| 2.9E-276  | 0.58443219 | 0.502 | 0.047 | 6E-272  | 32 | FKBP11   | Immune-B cells |
| 2.6E-202  | 1.45847312 | 0.923 | 0.264 | 6E-198  | 32 | SSR4     | Immune-B cells |
| 1.63E-163 | 0.37874192 | 0.333 | 0.034 | 4E-159  | 32 | PIM2     | Immune-B cells |
| 1.38E-166 | 0.48754248 | 0.462 | 0.063 | 3E-162  | 32 | PRDX4    | Immune-B cells |
| 7.11E-122 | 0.48989266 | 0.557 | 0.116 | 2E-117  | 32 | SPCS3    | Immune-B cells |
| 2.53E-109 | 0.3119797  | 0.341 | 0.049 | 6E-105  | 32 | ELL2     | Immune-B cells |
| 1.28E-102 | 0.34409557 | 0.366 | 0.06  | 2.8E-98 | 32 | SEC11C   | Immune-B cells |
| 1.113E-76 | 0.34498703 | 0.337 | 0.064 | 2.5E-72 | 32 | ANKRD28  | Immune-B cells |
| 2.154E-87 | 0.7825114  | 0.839 | 0.379 | 4.8E-83 | 32 | CYBA     | Immune-B cells |
| 3.522E-20 | 0.38880982 | 0.128 | 0.031 | 7.8E-16 | 32 | IGHG4    | Immune-B cells |
| 5.315E-68 | 0.33230023 | 0.366 | 0.082 | 1.2E-63 | 32 | SDF2L1   | Immune-B cells |
| 7.431E-61 | 0.50161544 | 0.557 | 0.194 | 1.6E-56 | 32 | HERPUD1  | Immune-B cells |
| 1.587E-51 | 0.4704152  | 0.531 | 0.178 | 3.5E-47 | 32 | RGS1     | Immune-B cells |
| 1.616E-61 | 0.35472707 | 0.44  | 0.121 | 3.6E-57 | 32 | SSR3     | Immune-B cells |
| 1.886E-61 | 0.60205817 | 0.777 | 0.39  | 4.2E-57 | 32 | SEC61G   | Immune-B cells |
| 3.187E-53 | 0.46980338 | 0.608 | 0.247 | 7E-49   | 32 | SPCS2    | Immune-B cells |
| 2.853E-55 | 0.5531526  | 0.725 | 0.353 | 6.3E-51 | 32 | SUB1     | Immune-B cells |
| 1.42E-39  | 0.56161656 | 0.612 | 0.306 | 3.1E-35 | 32 | HSP90B1  | Immune-B cells |
| 1.388E-49 | 0.44491901 | 0.575 | 0.233 | 3.1E-45 | 32 | SPCS1    | Immune-B cells |
| 8.855E-47 | 0.28788186 | 0.407 | 0.122 | 2E-42   | 32 | LY96     | Immune-B cells |
| 4.37E-47  | 0.36638186 | 0.571 | 0.226 | 9.7E-43 | 32 | SEC61B   | Immune-B cells |
| 3.079E-39 | 0.25065095 | 0.308 | 0.085 | 6.8E-35 | 32 | PRDM1    | Immune-B cells |
| 1.24E-33  | 0.38682286 | 0.491 | 0.214 | 2.7E-29 | 32 | BTG2     | Immune-B cells |
| 5.426E-33 | 0.43714109 | 0.604 | 0.298 | 1.2E-28 | 32 | NFKBIA   | Immune-B cells |
| 1.018E-35 | 0.36365381 | 0.59  | 0.269 | 2.2E-31 | 32 | TSC22D3  | Immune-B cells |
| 1.847E-28 | 0.31955576 | 0.476 | 0.22  | 4.1E-24 | 32 | FKBP2    | Immune-B cells |
| 7.711E-30 | 0.42924993 | 0.791 | 0.517 | 1.7E-25 | 32 | DUSP1    | Immune-B cells |
| 1.414E-28 | 0.25545874 | 0.396 | 0.155 | 3.1E-24 | 32 | MEF2C    | Immune-B cells |
| 2.088E-32 | 0.48233695 | 0.901 | 0.683 | 4.6E-28 | 32 | FOS      | Immune-B cells |
| 7.128E-29 | 0.27839609 | 0.476 | 0.21  | 1.6E-24 | 32 | SELK     | Immune-B cells |
| 1.479E-23 | 0.25212148 | 0.374 | 0.163 | 3.3E-19 | 32 | VIMP     | Immune-B cells |
| 3.567E-24 | 0.297599   | 0.524 | 0.277 | 7.9E-20 | 32 | TMEM258  | Immune-B cells |
| 3.478E-20 | 0.32603009 | 0.615 | 0.37  | 7.7E-16 | 32 | FOSB     | Immune-B cells |
| 8.868E-41 | 0.50038111 | 1     | 0.95  | 2E-36   | 32 | B2M      | Immune-B cells |
| 4.931E-22 | 0.28555402 | 0.568 | 0.313 | 1.1E-17 | 32 | TMEM59   | Immune-B cells |
| 2.124E-42 | 0.481706   | 0.978 | 0.922 | 4.7E-38 | 32 | RPLP1    | Immune-B cells |
| 1.452E-19 | 0.25104733 | 0.524 | 0.283 | 3.2E-15 | 32 | RPS10    | Immune-B cells |
| 2.419E-26 | 0.32180314 | 0.941 | 0.787 | 5.3E-22 | 32 | FTL      | Immune-B cells |
| 8.136E-15 | 0.28285424 | 0.755 | 0.59  | 1.8E-10 | 32 | RPS5     | Immune-B cells |
| 1.967E-18 | 0.28613683 | 0.897 | 0.752 | 4.3E-14 | 32 | RPL18A   | Immune-B cells |
| 1.877E-16 | 0.27226821 | 0.864 | 0.693 | 4.1E-12 | 32 | RPS26    | Immune-B cells |
| 3.166E-09 | 0.30367815 | 0.788 | 0.71  | 7E-05   | 32 | HSP90AA  | Immune-B cells |
| 9.395E-22 | 0.29940149 | 0.941 | 0.839 | 2.1E-17 | 32 | RPL35    | Immune-B cells |
| 4.237E-10 | 0.25583687 | 0.674 | 0.522 | 9.4E-06 | 32 | JUN      | Immune-B cells |
| 3.748E-24 | 0.32305024 | 1     | 0.999 | 8.3E-20 | 32 | MALAT1   | Immune-B cells |

|           |            |       |       |         |    |         |                |
|-----------|------------|-------|-------|---------|----|---------|----------------|
| 8.471E-14 | 0.28508075 | 0.93  | 0.86  | 1.9E-09 | 32 | NEAT1   | Immune-B cells |
| 3.859E-18 | 0.25740299 | 0.938 | 0.802 | 8.5E-14 | 32 | TPT1    | Immune-B cells |
| 6.892E-29 | -0.6116721 | 0     | 0.323 | 1.5E-24 | 32 | FXD2    | Immune-B cells |
| 8.578E-13 | -0.3686115 | 0     | 0.159 | 1.9E-08 | 32 | MMP7    | Immune-B cells |
| 7.447E-16 | -0.3458059 | 0.004 | 0.2   | 1.6E-11 | 32 | GPX3    | Immune-B cells |
| 2.793E-12 | -0.3476105 | 0.007 | 0.164 | 6.2E-08 | 32 | CXCL14  | Immune-B cells |
| 2.768E-16 | -0.4314562 | 0.011 | 0.216 | 6.1E-12 | 32 | CRYAB   | Immune-B cells |
| 2.888E-13 | -0.5542344 | 0.007 | 0.176 | 6.4E-09 | 32 | S100A2  | Immune-B cells |
| 4.148E-12 | -0.267558  | 0.015 | 0.174 | 9.2E-08 | 32 | TIMP3   | Immune-B cells |
| 2.855E-29 | -0.5358956 | 0.015 | 0.344 | 6.3E-25 | 32 | CD24    | Immune-B cells |
| 2.94E-25  | -0.8148946 | 0.011 | 0.305 | 6.5E-21 | 32 | DEFB1   | Immune-B cells |
| 6.008E-24 | -0.8180863 | 0.011 | 0.294 | 1.3E-19 | 32 | WFDC2   | Immune-B cells |
| 8.263E-21 | -0.3041188 | 0.033 | 0.291 | 1.8E-16 | 32 | APP     | Immune-B cells |
| 6.889E-11 | -0.2512657 | 0.029 | 0.182 | 1.5E-06 | 32 | CALD1   | Immune-B cells |
| 1.02E-18  | -0.2872265 | 0.044 | 0.286 | 2.3E-14 | 32 | NGFRAP1 | Immune-B cells |
| 3.522E-11 | -0.4913702 | 0.015 | 0.163 | 7.8E-07 | 32 | IGFBP5  | Immune-B cells |
| 5.399E-16 | -0.4235939 | 0.029 | 0.237 | 1.2E-11 | 32 | MT1E    | Immune-B cells |
| 9.853E-33 | -0.9746626 | 0.026 | 0.382 | 2.2E-28 | 32 | ATP1B1  | Immune-B cells |
| 1.06E-20  | -0.5963591 | 0.033 | 0.293 | 2.3E-16 | 32 | CLU     | Immune-B cells |
| 1.468E-13 | -0.3464684 | 0.051 | 0.246 | 3.2E-09 | 32 | HES1    | Immune-B cells |
| 1.033E-17 | -0.9908231 | 0.018 | 0.241 | 2.3E-13 | 32 | MT1G    | Immune-B cells |
| 3.895E-16 | -0.3018298 | 0.081 | 0.306 | 8.6E-12 | 32 | CD9     | Immune-B cells |
| 8.961E-12 | -0.2644931 | 0.084 | 0.26  | 2E-07   | 32 | ATP1A1  | Immune-B cells |
| 1.5E-15   | -0.3022812 | 0.15  | 0.378 | 3.3E-11 | 32 | S100A10 | Immune-B cells |
| 1.512E-37 | -0.8171471 | 0.084 | 0.481 | 3.3E-33 | 32 | IGFBP7  | Immune-B cells |
| 4.209E-17 | -0.645345  | 0.07  | 0.303 | 9.3E-13 | 32 | ADIRF   | Immune-B cells |
| 1.571E-12 | -0.3311578 | 0.183 | 0.393 | 3.5E-08 | 32 | IFITM3  | Immune-B cells |
| 1.498E-10 | -0.2606878 | 0.271 | 0.452 | 3.3E-06 | 32 | S100A11 | Immune-B cells |
| 3.419E-10 | -0.256566  | 0.374 | 0.544 | 7.6E-06 | 32 | MYL6    | Immune-B cells |
| 9.397E-13 | -0.3270442 | 0.231 | 0.424 | 2.1E-08 | 32 | DSTN    | Immune-B cells |
| 8.939E-13 | -0.3673674 | 0.234 | 0.437 | 2E-08   | 32 | HSPB1   | Immune-B cells |
| 6.91E-08  | -0.4317353 | 0.136 | 0.276 | 0.00153 | 32 | MT1X    | Immune-B cells |
| 2.493E-13 | -0.3194333 | 0.623 | 0.801 | 5.5E-09 | 32 | FTH1    | Immune-B cells |
| 2.324E-15 | -0.2845241 | 0.821 | 0.932 | 5.1E-11 | 32 | EEF1A1  | Immune-B cells |
| 2.427E-30 | -0.5275469 | 0.37  | 0.664 | 5.4E-26 | 32 | ITM2B   | Immune-B cells |
| 1.967E-23 | -0.7212774 | 0.212 | 0.513 | 4.3E-19 | 32 | MT2A    | Immune-B cells |
| 2.948E-11 | -0.3219861 | 0.802 | 0.859 | 6.5E-07 | 32 | TMSB10  | Immune-B cells |
| 4.535E-16 | -0.9043117 | 0.143 | 0.381 | 1E-11   | 32 | SPP1    | Immune-B cells |
| 1.89E-40  | -0.7568836 | 0.33  | 0.707 | 4.2E-36 | 32 | S100A6  | Immune-B cells |
| 3.125E-34 | -0.5696056 | 0.824 | 0.925 | 6.9E-30 | 32 | MT-ND5  | Immune-B cells |
| 5.627E-34 | -0.6801329 | 0.608 | 0.805 | 1.2E-29 | 32 | MT-ND4L | Immune-B cells |
| 7.791E-57 | -0.6241629 | 1     | 1     | 1.7E-52 | 32 | MT-CO2  | Immune-B cells |
| 2.628E-52 | -0.7123556 | 0.978 | 0.995 | 5.8E-48 | 32 | MT-ND2  | Immune-B cells |
| 3.375E-58 | -0.8456844 | 0.81  | 0.964 | 7.5E-54 | 32 | MT-ND1  | Immune-B cells |
| 5.459E-66 | -0.7824266 | 0.941 | 0.992 | 1.2E-61 | 32 | MT-CYB  | Immune-B cells |
| 1.097E-68 | -0.7999897 | 0.949 | 0.994 | 2.4E-64 | 32 | MT-ATP6 | Immune-B cells |
| 4.86E-72  | -0.7976516 | 0.993 | 0.999 | 1.1E-67 | 32 | MT-ND4  | Immune-B cells |
| 6.631E-62 | -0.8119026 | 1     | 1     | 1.5E-57 | 32 | MT-CO3  | Immune-B cells |

|           |            |       |       |         |    |          |                 |
|-----------|------------|-------|-------|---------|----|----------|-----------------|
| 2.402E-73 | -0.8495269 | 1     | 1     | 5.3E-69 | 32 | MT-CO1   | Immune-B cells  |
| 8.727E-79 | -0.9639627 | 0.982 | 0.999 | 1.9E-74 | 32 | MT-ND3   | Immune-B cells  |
| 4.047E-62 | -0.7195686 | 0.355 | 0.08  | 8.9E-58 | 32 | IGLC3    | Immune-B cells  |
| 1.465E-41 | -0.9953024 | 0.326 | 0.09  | 3.2E-37 | 32 | IGLC2    | Immune-B cells  |
| 0         | 1.29012041 | 0.893 | 0.036 | 0       | 33 | GZMB     | Immune-NK cells |
| 0         | 0.96655699 | 0.805 | 0.038 | 0       | 33 | JCHAIN   | Immune-NK cells |
| 0         | 0.41011124 | 0.378 | 0.008 | 0       | 33 | BCL11A   | Immune-NK cells |
| 0         | 0.63854836 | 0.496 | 0.021 | 0       | 33 | CLIC3    | Immune-NK cells |
| 0         | 0.51900248 | 0.511 | 0.024 | 0       | 33 | IRF7     | Immune-NK cells |
| 0         | 0.709076   | 0.576 | 0.038 | 0       | 33 | PLAC8    | Immune-NK cells |
| 0         | 0.27672839 | 0.271 | 0.007 | 0       | 33 | P2RY14   | Immune-NK cells |
| 0         | 0.52813609 | 0.469 | 0.028 | 0       | 33 | IRF8     | Immune-NK cells |
| 0         | 0.30213571 | 0.26  | 0.009 | 0       | 33 | SERPINF1 | Immune-NK cells |
| 3.08E-272 | 0.61176798 | 0.508 | 0.047 | 7E-268  | 33 | GPR183   | Immune-NK cells |
| 4E-246    | 0.67354547 | 0.63  | 0.079 | 9E-242  | 33 | ALOX5AP  | Immune-NK cells |
| 7.93E-214 | 0.32852399 | 0.332 | 0.025 | 2E-209  | 33 | SELL     | Immune-NK cells |
| 1.7E-188  | 0.73849061 | 0.702 | 0.125 | 4E-184  | 33 | TCF4     | Immune-NK cells |
| 3.12E-184 | 0.32815159 | 0.302 | 0.024 | 7E-180  | 33 | TSPAN13  | Immune-NK cells |
| 5.51E-99  | 0.81422327 | 0.466 | 0.095 | 1.2E-94 | 33 | AREG     | Immune-NK cells |
| 3.08E-135 | 0.54744601 | 0.557 | 0.103 | 7E-131  | 33 | UGCG     | Immune-NK cells |
| 2.547E-94 | 0.39186708 | 0.344 | 0.055 | 5.6E-90 | 33 | PRMT9    | Immune-NK cells |
| 2.634E-58 | 0.39441664 | 0.275 | 0.052 | 5.8E-54 | 33 | PTGDS    | Immune-NK cells |
| 4.496E-85 | 0.69014464 | 0.729 | 0.245 | 9.9E-81 | 33 | CXCR4    | Immune-NK cells |
| 2.271E-66 | 0.28721617 | 0.237 | 0.037 | 5E-62   | 33 | PTPRS    | Immune-NK cells |
| 4.719E-75 | 0.35174474 | 0.374 | 0.077 | 1E-70   | 33 | CCDC50   | Immune-NK cells |
| 2.133E-80 | 0.25604106 | 0.286 | 0.044 | 4.7E-76 | 33 | PPP1R14  | Immune-NK cells |
| 5.162E-86 | 0.27264069 | 0.336 | 0.056 | 1.1E-81 | 33 | PTPRE    | Immune-NK cells |
| 1.478E-76 | 0.29309534 | 0.328 | 0.059 | 3.3E-72 | 33 | RNASE6   | Immune-NK cells |
| 6.437E-56 | 0.50841718 | 0.546 | 0.178 | 1.4E-51 | 33 | RGS1     | Immune-NK cells |
| 3.92E-83  | 0.74817322 | 0.935 | 0.46  | 8.7E-79 | 33 | CD74     | Immune-NK cells |
| 2.173E-46 | 0.46230775 | 0.561 | 0.226 | 4.8E-42 | 33 | SEC61B   | Immune-NK cells |
| 3.039E-39 | 0.34965982 | 0.374 | 0.119 | 6.7E-35 | 33 | DDIT4    | Immune-NK cells |
| 5.267E-40 | 0.26155954 | 0.29  | 0.076 | 1.2E-35 | 33 | C9orf142 | Immune-NK cells |
| 1.291E-93 | 0.71759869 | 1     | 0.859 | 2.9E-89 | 33 | RPS8     | Immune-NK cells |
| 6.638E-32 | 0.31502016 | 0.427 | 0.164 | 1.5E-27 | 33 | C12orf75 | Immune-NK cells |
| 3.068E-36 | 0.2981641  | 0.439 | 0.162 | 6.8E-32 | 33 | VIMP     | Immune-NK cells |
| 8.021E-32 | 0.32959068 | 0.45  | 0.187 | 1.8E-27 | 33 | CD164    | Immune-NK cells |
| 4.261E-40 | 0.45153522 | 0.809 | 0.464 | 9.4E-36 | 33 | PABPC1   | Immune-NK cells |
| 3.825E-45 | 0.53768466 | 0.943 | 0.755 | 8.5E-41 | 33 | RPS3A    | Immune-NK cells |
| 3.232E-17 | 0.29167369 | 0.302 | 0.132 | 7.1E-13 | 33 | RGS2     | Immune-NK cells |
| 2.358E-33 | 0.44107219 | 0.779 | 0.517 | 5.2E-29 | 33 | RPL23    | Immune-NK cells |
| 1.621E-29 | 0.33509758 | 0.63  | 0.318 | 3.6E-25 | 33 | GPX1     | Immune-NK cells |
| 5.033E-13 | 0.42166497 | 0.466 | 0.298 | 1.1E-08 | 33 | TXN      | Immune-NK cells |
| 6.666E-32 | 0.34376755 | 0.721 | 0.38  | 1.5E-27 | 33 | CYBA     | Immune-NK cells |
| 5.545E-77 | 0.58095027 | 1     | 0.97  | 1.2E-72 | 33 | RPS27    | Immune-NK cells |
| 1.296E-30 | 0.40442122 | 0.794 | 0.575 | 2.9E-26 | 33 | RPS11    | Immune-NK cells |
| 3.106E-30 | 0.4126467  | 0.863 | 0.658 | 6.9E-26 | 33 | RPL6     | Immune-NK cells |
| 9.049E-20 | 0.2754881  | 0.45  | 0.233 | 2E-15   | 33 | SPCS1    | Immune-NK cells |

|           |            |       |       |         |    |         |                 |
|-----------|------------|-------|-------|---------|----|---------|-----------------|
| 5.549E-39 | 0.43631045 | 0.95  | 0.823 | 1.2E-34 | 33 | RPS15A  | Immune-NK cells |
| 3.235E-36 | 0.41344224 | 0.939 | 0.772 | 7.1E-32 | 33 | RPL23A  | Immune-NK cells |
| 1.293E-44 | 0.44007179 | 0.962 | 0.857 | 2.9E-40 | 33 | RPS12   | Immune-NK cells |
| 1.185E-24 | 0.38072472 | 0.805 | 0.631 | 2.6E-20 | 33 | RPL37   | Immune-NK cells |
| 4.493E-29 | 0.38970481 | 0.882 | 0.71  | 9.9E-25 | 33 | RPS13   | Immune-NK cells |
| 1.66E-27  | 0.37920256 | 0.882 | 0.701 | 3.7E-23 | 33 | RPS2    | Immune-NK cells |
| 9.245E-26 | 0.38651624 | 0.866 | 0.714 | 2E-21   | 33 | RPS4X   | Immune-NK cells |
| 1.247E-35 | 0.43119353 | 0.985 | 0.914 | 2.8E-31 | 33 | RPL10   | Immune-NK cells |
| 4.593E-43 | 0.43114313 | 0.996 | 0.948 | 1E-38   | 33 | RPL21   | Immune-NK cells |
| 6.69E-26  | 0.3680016  | 0.859 | 0.702 | 1.5E-21 | 33 | RPL19   | Immune-NK cells |
| 3.468E-37 | 0.40643296 | 0.962 | 0.888 | 7.7E-33 | 33 | RPS28   | Immune-NK cells |
| 2.049E-20 | 0.3200111  | 0.79  | 0.575 | 4.5E-16 | 33 | RPL10A  | Immune-NK cells |
| 9.748E-25 | 0.35520219 | 0.916 | 0.756 | 2.2E-20 | 33 | RPL35A  | Immune-NK cells |
| 5.805E-23 | 0.34423485 | 0.859 | 0.698 | 1.3E-18 | 33 | RPS17   | Immune-NK cells |
| 1.91E-17  | 0.32489337 | 0.866 | 0.683 | 4.2E-13 | 33 | FOS     | Immune-NK cells |
| 1.041E-14 | 0.28063564 | 0.573 | 0.391 | 2.3E-10 | 33 | SEC61G  | Immune-NK cells |
| 4.595E-27 | 0.35446896 | 0.924 | 0.8   | 1E-22   | 33 | RPL11   | Immune-NK cells |
| 1.13E-33  | 0.38722338 | 0.977 | 0.927 | 2.5E-29 | 33 | RPS29   | Immune-NK cells |
| 3.648E-26 | 0.3650302  | 0.924 | 0.829 | 8.1E-22 | 33 | RPS23   | Immune-NK cells |
| 8.169E-17 | 0.29850667 | 0.725 | 0.535 | 1.8E-12 | 33 | RPL30   | Immune-NK cells |
| 4.803E-17 | 0.30761938 | 0.725 | 0.554 | 1.1E-12 | 33 | RPS7    | Immune-NK cells |
| 2.922E-17 | 0.29277185 | 0.752 | 0.548 | 6.5E-13 | 33 | RPL27   | Immune-NK cells |
| 3.755E-15 | 0.29644969 | 0.744 | 0.59  | 8.3E-11 | 33 | RPS5    | Immune-NK cells |
| 4.035E-33 | 0.35332841 | 0.989 | 0.941 | 8.9E-29 | 33 | RPL39   | Immune-NK cells |
| 3.652E-15 | 0.27961129 | 0.76  | 0.613 | 8.1E-11 | 33 | UBA52   | Immune-NK cells |
| 2.916E-20 | 0.29031733 | 0.897 | 0.752 | 6.4E-16 | 33 | RPS24   | Immune-NK cells |
| 8.908E-25 | 0.32608685 | 0.973 | 0.918 | 2E-20   | 33 | RPS27A  | Immune-NK cells |
| 2.127E-27 | 0.31277331 | 0.939 | 0.85  | 4.7E-23 | 33 | RPS6    | Immune-NK cells |
| 7.41E-27  | 0.31356781 | 0.996 | 0.923 | 1.6E-22 | 33 | RPS18   | Immune-NK cells |
| 1.297E-26 | 0.31259842 | 0.985 | 0.913 | 2.9E-22 | 33 | RPL13A  | Immune-NK cells |
| 6.697E-16 | 0.27201831 | 0.786 | 0.64  | 1.5E-11 | 33 | RPS20   | Immune-NK cells |
| 1.632E-17 | 0.2797985  | 0.885 | 0.752 | 3.6E-13 | 33 | RPL18A  | Immune-NK cells |
| 7.769E-14 | 0.25585827 | 0.786 | 0.615 | 1.7E-09 | 33 | RPS16   | Immune-NK cells |
| 4.205E-16 | 0.27167604 | 0.817 | 0.679 | 9.3E-12 | 33 | FAU     | Immune-NK cells |
| 2.714E-35 | 0.31562389 | 1     | 0.979 | 6E-31   | 33 | RPL34   | Immune-NK cells |
| 1.943E-23 | 0.29190944 | 0.981 | 0.894 | 4.3E-19 | 33 | RPS19   | Immune-NK cells |
| 8.268E-21 | 0.28977913 | 0.908 | 0.832 | 1.8E-16 | 33 | RPLP2   | Immune-NK cells |
| 4.346E-15 | 0.25874193 | 0.863 | 0.736 | 9.6E-11 | 33 | RPL27A  | Immune-NK cells |
| 2.476E-19 | 0.27942589 | 0.947 | 0.88  | 5.5E-15 | 33 | RPS14   | Immune-NK cells |
| 4.063E-13 | 0.25170371 | 0.805 | 0.693 | 9E-09   | 33 | RPL9    | Immune-NK cells |
| 7.242E-20 | 0.26844314 | 0.962 | 0.902 | 1.6E-15 | 33 | RPL32   | Immune-NK cells |
| 1.718E-16 | 0.25931332 | 0.882 | 0.803 | 3.8E-12 | 33 | RPL37A  | Immune-NK cells |
| 1.394E-18 | 0.25005604 | 0.927 | 0.836 | 3.1E-14 | 33 | RPL26   | Immune-NK cells |
| 1.14E-11  | -0.2897845 | 0.019 | 0.181 | 2.5E-07 | 33 | SPARC   | Immune-NK cells |
| 2.171E-10 | -0.3237181 | 0.015 | 0.159 | 4.8E-06 | 33 | MMP7    | Immune-NK cells |
| 3.648E-10 | -0.2605035 | 0.034 | 0.182 | 8.1E-06 | 33 | CALD1   | Immune-NK cells |
| 7.936E-17 | -0.2744204 | 0.053 | 0.286 | 1.8E-12 | 33 | NGFRAP1 | Immune-NK cells |
| 7.013E-15 | -0.2596636 | 0.053 | 0.268 | 1.5E-10 | 33 | CD59    | Immune-NK cells |

|           |            |       |       |         |    |         |                 |
|-----------|------------|-------|-------|---------|----|---------|-----------------|
| 6.946E-23 | -0.803003  | 0.023 | 0.305 | 1.5E-18 | 33 | DEFB1   | Immune-NK cells |
| 5.442E-19 | -0.3272176 | 0.061 | 0.322 | 1.2E-14 | 33 | RHOB    | Immune-NK cells |
| 7.159E-09 | -0.2640518 | 0.042 | 0.177 | 0.00016 | 33 | IFI27   | Immune-NK cells |
| 1.268E-18 | -0.3405095 | 0.057 | 0.306 | 2.8E-14 | 33 | CD9     | Immune-NK cells |
| 1.251E-07 | -0.3268497 | 0.027 | 0.139 | 0.00276 | 33 | CTGF    | Immune-NK cells |
| 3.057E-07 | -0.2759685 | 0.034 | 0.146 | 0.00675 | 33 | CXCL2   | Immune-NK cells |
| 9.972E-14 | -0.430791  | 0.034 | 0.226 | 2.2E-09 | 33 | TIMP1   | Immune-NK cells |
| 4.155E-14 | -0.3743516 | 0.046 | 0.246 | 9.2E-10 | 33 | HES1    | Immune-NK cells |
| 6.215E-09 | -0.4420995 | 0.027 | 0.155 | 0.00014 | 33 | LYZ     | Immune-NK cells |
| 1.571E-18 | -0.5621314 | 0.042 | 0.292 | 3.5E-14 | 33 | CLU     | Immune-NK cells |
| 2.734E-11 | -0.2610758 | 0.084 | 0.26  | 6E-07   | 33 | ATP1A1  | Immune-NK cells |
| 4.407E-22 | -0.4768123 | 0.061 | 0.344 | 9.7E-18 | 33 | CD24    | Immune-NK cells |
| 4.039E-29 | -0.9122091 | 0.038 | 0.382 | 8.9E-25 | 33 | ATP1B1  | Immune-NK cells |
| 1.42E-05  | -0.2710706 | 0.046 | 0.137 | 0.31381 | 33 | SPARCL1 | Immune-NK cells |
| 4.286E-10 | -0.5239889 | 0.031 | 0.176 | 9.5E-06 | 33 | S100A2  | Immune-NK cells |
| 4.756E-11 | -0.3974579 | 0.053 | 0.216 | 1.1E-06 | 33 | CRYAB   | Immune-NK cells |
| 5.092E-20 | -0.7224455 | 0.042 | 0.303 | 1.1E-15 | 33 | ADIRF   | Immune-NK cells |
| 0.0001063 | -0.2859024 | 0.042 | 0.116 | 1       | 33 | C1QA    | Immune-NK cells |
| 3.044E-17 | -0.3973449 | 0.088 | 0.332 | 6.7E-13 | 33 | CTSD    | Immune-NK cells |
| 4.056E-14 | -0.2766323 | 0.145 | 0.378 | 9E-10   | 33 | S100A10 | Immune-NK cells |
| 6.053E-23 | -0.3754549 | 0.122 | 0.425 | 1.3E-18 | 33 | CD63    | Immune-NK cells |
| 8.087E-16 | -0.3024761 | 0.153 | 0.388 | 1.8E-11 | 33 | PPDPF   | Immune-NK cells |
| 2.997E-05 | -0.2741175 | 0.073 | 0.164 | 0.66212 | 33 | CXCL14  | Immune-NK cells |
| 2.206E-19 | -0.3702767 | 0.134 | 0.402 | 4.9E-15 | 33 | ZFP36L1 | Immune-NK cells |
| 1.823E-06 | -0.3606624 | 0.057 | 0.163 | 0.04028 | 33 | MGP     | Immune-NK cells |
| 1.595E-09 | -0.3646963 | 0.084 | 0.237 | 3.5E-05 | 33 | MT1E    | Immune-NK cells |
| 6.491E-36 | -0.8021768 | 0.08  | 0.481 | 1.4E-31 | 33 | IGFBP7  | Immune-NK cells |
| 5.458E-21 | -0.4603211 | 0.115 | 0.393 | 1.2E-16 | 33 | IFITM3  | Immune-NK cells |
| 1.171E-05 | -0.2783174 | 0.095 | 0.196 | 0.25868 | 33 | AIF1    | Immune-NK cells |
| 5.203E-18 | -0.7768557 | 0.053 | 0.294 | 1.1E-13 | 33 | WFDC2   | Immune-NK cells |
| 8.219E-13 | -0.2789846 | 0.248 | 0.46  | 1.8E-08 | 33 | GAPDH   | Immune-NK cells |
| 1.544E-14 | -0.4561601 | 0.107 | 0.323 | 3.4E-10 | 33 | FXD2    | Immune-NK cells |
| 9.613E-18 | -0.3577648 | 0.191 | 0.452 | 2.1E-13 | 33 | S100A11 | Immune-NK cells |
| 2.145E-15 | -0.3829221 | 0.16  | 0.399 | 4.7E-11 | 33 | EGR1    | Immune-NK cells |
| 7.656E-09 | -0.265974  | 0.256 | 0.424 | 0.00017 | 33 | DSTN    | Immune-NK cells |
| 2.07E-11  | -0.2553931 | 0.382 | 0.567 | 4.6E-07 | 33 | ATP5I   | Immune-NK cells |
| 4.277E-23 | -0.5547577 | 0.141 | 0.438 | 9.4E-19 | 33 | HSPB1   | Immune-NK cells |
| 8.2E-05   | -0.3948643 | 0.076 | 0.163 | 1       | 33 | IGFBP5  | Immune-NK cells |
| 1.97E-08  | -0.3091293 | 0.309 | 0.466 | 0.00044 | 33 | HSPA1A  | Immune-NK cells |
| 2.255E-14 | -0.5575867 | 0.153 | 0.368 | 5E-10   | 33 | LGALS1  | Immune-NK cells |
| 0.0001679 | -0.2591342 | 0.771 | 0.832 | 1       | 33 | ACTB    | Immune-NK cells |
| 2.296E-33 | -0.5747367 | 0.336 | 0.664 | 5.1E-29 | 33 | ITM2B   | Immune-NK cells |
| 4.532E-09 | -0.2983438 | 1     | 1     | 0.0001  | 33 | MT-CO1  | Immune-NK cells |
| 1.584E-20 | -0.5455786 | 0.317 | 0.575 | 3.5E-16 | 33 | SAT1    | Immune-NK cells |
| 1.493E-20 | -0.7332639 | 0.225 | 0.513 | 3.3E-16 | 33 | MT2A    | Immune-NK cells |
| 3.796E-21 | -1.2868468 | 0.107 | 0.381 | 8.4E-17 | 33 | SPP1    | Immune-NK cells |
| 4.428E-43 | -0.6475385 | 0.523 | 0.861 | 9.8E-39 | 33 | NEAT1   | Immune-NK cells |
| 7.952E-24 | -0.6590023 | 0.496 | 0.707 | 1.8E-19 | 33 | S100A6  | Immune-NK cells |

|           |            |       |       |         |    |          |                 |
|-----------|------------|-------|-------|---------|----|----------|-----------------|
| 0.0048124 | -0.4004887 | 0.324 | 0.24  | 1       | 33 | MT1G     | Immune-NK cells |
| 3.105E-47 | -1.3677809 | 0.542 | 0.18  | 6.9E-43 | 33 | IGKC     | Immune-NK cells |
| 0         | 3.45195188 | 1     | 0.011 | 0       | 34 | IGHG2    | Immune-B cells  |
| 0         | 2.10317476 | 0.987 | 0.07  | 0       | 34 | IGHG1    | Immune-B cells  |
| 0         | 1.03316716 | 0.747 | 0.036 | 0       | 34 | MZB1     | Immune-B cells  |
| 0         | 1.7956474  | 0.941 | 0.082 | 0       | 34 | IGHG3    | Immune-B cells  |
| 0         | 1.45464531 | 0.54  | 0.039 | 0       | 34 | JCHAIN   | Immune-B cells  |
| 1.39E-152 | 2.85594969 | 0.527 | 0.08  | 3E-148  | 34 | IGLC3    | Immune-B cells  |
| 1.58E-145 | 2.80445591 | 0.549 | 0.089 | 4E-141  | 34 | IGLC2    | Immune-B cells  |
| 1.33E-243 | 0.61367274 | 0.19  | 0.007 | 3E-239  | 34 | IGLV6-57 | Immune-B cells  |
| 2.23E-178 | 3.24862948 | 0.814 | 0.179 | 5E-174  | 34 | IGKC     | Immune-B cells  |
| 0         | 0.61569077 | 0.662 | 0.03  | 0       | 34 | IGHG4    | Immune-B cells  |
| 0         | 0.33273072 | 0.354 | 0.015 | 0       | 34 | DERL3    | Immune-B cells  |
| 5.22E-302 | 0.29346355 | 0.295 | 0.013 | 1E-297  | 34 | TNFRSF17 | Immune-B cells  |
| 1.44E-184 | 1.38988027 | 0.924 | 0.264 | 3E-180  | 34 | SSR4     | Immune-B cells  |
| 1.565E-91 | 0.66226667 | 0.312 | 0.043 | 3.5E-87 | 34 | IGHA1    | Immune-B cells  |
| 6.55E-202 | 0.38890691 | 0.392 | 0.034 | 1E-197  | 34 | PIM2     | Immune-B cells  |
| 3.73E-155 | 0.84496436 | 0.684 | 0.133 | 8E-151  | 34 | XBP1     | Immune-B cells  |
| 3.53E-198 | 0.44315658 | 0.464 | 0.048 | 8E-194  | 34 | FKBP11   | Immune-B cells  |
| 6.28E-129 | 0.46713889 | 0.439 | 0.063 | 1E-124  | 34 | PRDX4    | Immune-B cells  |
| 8.453E-69 | 0.33529445 | 0.342 | 0.065 | 1.9E-64 | 34 | ANKRD28  | Immune-B cells  |
| 2.627E-71 | 0.25413803 | 0.308 | 0.051 | 5.8E-67 | 34 | ISG20    | Immune-B cells  |
| 2.216E-57 | 0.36132191 | 0.439 | 0.116 | 4.9E-53 | 34 | SPCS3    | Immune-B cells  |
| 1.284E-58 | 0.57316223 | 0.827 | 0.379 | 2.8E-54 | 34 | CYBA     | Immune-B cells  |
| 4.141E-48 | 0.44450074 | 0.544 | 0.194 | 9.1E-44 | 34 | HERPUD1  | Immune-B cells  |
| 6.068E-55 | 0.26518275 | 0.359 | 0.082 | 1.3E-50 | 34 | SDF2L1   | Immune-B cells  |
| 1.842E-38 | 0.3833581  | 0.506 | 0.178 | 4.1E-34 | 34 | RGS1     | Immune-B cells  |
| 6.498E-49 | 0.40816885 | 0.629 | 0.247 | 1.4E-44 | 34 | SPCS2    | Immune-B cells  |
| 7.578E-41 | 0.46418779 | 0.717 | 0.353 | 1.7E-36 | 34 | SUB1     | Immune-B cells  |
| 5.306E-39 | 0.27883708 | 0.392 | 0.121 | 1.2E-34 | 34 | SSR3     | Immune-B cells  |
| 4.512E-31 | 0.37827954 | 0.523 | 0.233 | 1E-26   | 34 | SPCS1    | Immune-B cells  |
| 8.045E-23 | 0.30995471 | 0.464 | 0.214 | 1.8E-18 | 34 | BTG2     | Immune-B cells  |
| 3.956E-24 | 0.31678519 | 0.595 | 0.306 | 8.7E-20 | 34 | HSP90B1  | Immune-B cells  |
| 9.179E-24 | 0.33422465 | 0.679 | 0.39  | 2E-19   | 34 | SEC61G   | Immune-B cells  |
| 2.019E-24 | 0.25438047 | 0.473 | 0.21  | 4.5E-20 | 34 | SELK     | Immune-B cells  |
| 7.711E-22 | 0.27306259 | 0.54  | 0.277 | 1.7E-17 | 34 | TMEM258  | Immune-B cells  |
| 3.287E-29 | 0.38865914 | 1     | 0.95  | 7.3E-25 | 34 | B2M      | Immune-B cells  |
| 3.714E-31 | 0.39446784 | 1     | 0.999 | 8.2E-27 | 34 | MALAT1   | Immune-B cells  |
| 3.948E-11 | 0.26167195 | 0.873 | 0.683 | 8.7E-07 | 34 | FOS      | Immune-B cells  |
| 1.581E-21 | 0.30799059 | 0.987 | 0.922 | 3.5E-17 | 34 | RPLP1    | Immune-B cells  |
| 7.97E-08  | 0.29949362 | 0.772 | 0.71  | 0.00176 | 34 | HSP90AA  | Immune-B cells  |
| 6.974E-14 | -0.4000485 | 0.013 | 0.216 | 1.5E-09 | 34 | CRYAB    | Immune-B cells  |
| 3.458E-10 | -0.3339115 | 0.013 | 0.164 | 7.6E-06 | 34 | CXCL14   | Immune-B cells  |
| 4.209E-10 | -0.2719264 | 0.021 | 0.174 | 9.3E-06 | 34 | TIMP3    | Immune-B cells  |
| 7.015E-23 | -0.5906144 | 0.021 | 0.323 | 1.5E-18 | 34 | FXD2     | Immune-B cells  |
| 1.111E-17 | -0.2991861 | 0.038 | 0.291 | 2.5E-13 | 34 | APP      | Immune-B cells  |
| 4.81E-11  | -0.5363658 | 0.013 | 0.176 | 1.1E-06 | 34 | S100A2   | Immune-B cells  |
| 3.696E-10 | -0.5028124 | 0.013 | 0.163 | 8.2E-06 | 34 | IGFBP5   | Immune-B cells  |

|           |            |       |       |         |    |         |                |
|-----------|------------|-------|-------|---------|----|---------|----------------|
| 5.868E-15 | -0.3074185 | 0.038 | 0.26  | 1.3E-10 | 34 | ATP1A1  | Immune-B cells |
| 8.992E-24 | -0.5166082 | 0.03  | 0.344 | 2E-19   | 34 | CD24    | Immune-B cells |
| 2.188E-09 | -0.2610269 | 0.034 | 0.182 | 4.8E-05 | 34 | CALD1   | Immune-B cells |
| 7.051E-14 | -0.4150764 | 0.03  | 0.237 | 1.6E-09 | 34 | MT1E    | Immune-B cells |
| 4.735E-14 | -0.256493  | 0.063 | 0.286 | 1E-09   | 34 | NGFRAP1 | Immune-B cells |
| 5.483E-08 | -0.3070409 | 0.03  | 0.159 | 0.00121 | 34 | MMP7    | Immune-B cells |
| 3.172E-10 | -0.3120382 | 0.038 | 0.2   | 7E-06   | 34 | GPX3    | Immune-B cells |
| 1.176E-13 | -0.3913565 | 0.038 | 0.246 | 2.6E-09 | 34 | HES1    | Immune-B cells |
| 1.893E-20 | -0.7919579 | 0.025 | 0.305 | 4.2E-16 | 34 | DEFB1   | Immune-B cells |
| 6.607E-16 | -0.3307701 | 0.068 | 0.306 | 1.5E-11 | 34 | CD9     | Immune-B cells |
| 2.552E-18 | -0.7388106 | 0.03  | 0.294 | 5.6E-14 | 34 | WFDC2   | Immune-B cells |
| 3.157E-26 | -0.9265253 | 0.042 | 0.382 | 7E-22   | 34 | ATP1B1  | Immune-B cells |
| 3.216E-05 | -0.2637018 | 0.063 | 0.163 | 0.71057 | 34 | MGP     | Immune-B cells |
| 4.671E-11 | -0.2626071 | 0.127 | 0.322 | 1E-06   | 34 | RHOB    | Immune-B cells |
| 6.687E-13 | -0.272658  | 0.143 | 0.361 | 1.5E-08 | 34 | LAPTM4A | Immune-B cells |
| 6.745E-15 | -0.3103264 | 0.135 | 0.377 | 1.5E-10 | 34 | S100A10 | Immune-B cells |
| 1.178E-08 | -0.2563481 | 0.16  | 0.332 | 0.00026 | 34 | CTSD    | Immune-B cells |
| 1.58E-15  | -0.6112183 | 0.063 | 0.303 | 3.5E-11 | 34 | ADIRF   | Immune-B cells |
| 7.09E-11  | -0.2590245 | 0.19  | 0.387 | 1.6E-06 | 34 | PPDPF   | Immune-B cells |
| 2.507E-19 | -0.382813  | 0.156 | 0.452 | 5.5E-15 | 34 | S100A11 | Immune-B cells |
| 3.377E-13 | -0.5344701 | 0.08  | 0.292 | 7.5E-09 | 34 | CLU     | Immune-B cells |
| 2.749E-13 | -0.9576889 | 0.038 | 0.241 | 6.1E-09 | 34 | MT1G    | Immune-B cells |
| 8.844E-29 | -0.7252139 | 0.101 | 0.481 | 2E-24   | 34 | IGFBP7  | Immune-B cells |
| 1.047E-16 | -0.394602  | 0.173 | 0.424 | 2.3E-12 | 34 | DSTN    | Immune-B cells |
| 5.889E-12 | -0.2790017 | 0.304 | 0.525 | 1.3E-07 | 34 | ACTG1   | Immune-B cells |
| 3.997E-13 | -0.3641347 | 0.19  | 0.428 | 8.8E-09 | 34 | CST3    | Immune-B cells |
| 5.377E-08 | -0.251762  | 0.295 | 0.445 | 0.00119 | 34 | TXNIP   | Immune-B cells |
| 5.453E-12 | -0.3631239 | 0.181 | 0.393 | 1.2E-07 | 34 | IFITM3  | Immune-B cells |
| 3.702E-10 | -0.2683094 | 0.392 | 0.567 | 8.2E-06 | 34 | ATP5I   | Immune-B cells |
| 1.656E-10 | -0.2720425 | 0.38  | 0.555 | 3.7E-06 | 34 | SRP14   | Immune-B cells |
| 4.326E-09 | -0.4890803 | 0.11  | 0.276 | 9.6E-05 | 34 | MT1X    | Immune-B cells |
| 1.004E-22 | -0.4367817 | 0.249 | 0.545 | 2.2E-18 | 34 | MYL6    | Immune-B cells |
| 9.355E-15 | -0.3390169 | 0.333 | 0.564 | 2.1E-10 | 34 | CALM2   | Immune-B cells |
| 1.138E-15 | -0.3487327 | 0.308 | 0.534 | 2.5E-11 | 34 | NDUFA4  | Immune-B cells |
| 3.258E-12 | -0.4133578 | 0.228 | 0.437 | 7.2E-08 | 34 | HSPB1   | Immune-B cells |
| 1.549E-19 | -0.3932336 | 0.388 | 0.639 | 3.4E-15 | 34 | COX7C   | Immune-B cells |
| 6.392E-13 | -0.2738656 | 0.869 | 0.939 | 1.4E-08 | 34 | PTMA    | Immune-B cells |
| 8.338E-20 | -1.1094308 | 0.093 | 0.381 | 1.8E-15 | 34 | SPP1    | Immune-B cells |
| 3.577E-35 | -0.6115963 | 0.3   | 0.664 | 7.9E-31 | 34 | ITM2B   | Immune-B cells |
| 0.0006838 | -0.3254308 | 0.392 | 0.461 | 1       | 34 | CD74    | Immune-B cells |
| 2.468E-25 | -0.8237441 | 0.181 | 0.513 | 5.5E-21 | 34 | MT2A    | Immune-B cells |
| 2.276E-17 | -0.4191491 | 0.616 | 0.833 | 5E-13   | 34 | ACTB    | Immune-B cells |
| 1.83E-24  | -0.38664   | 0.802 | 0.932 | 4E-20   | 34 | EEF1A1  | Immune-B cells |
| 3.429E-22 | -0.4948351 | 0.549 | 0.802 | 7.6E-18 | 34 | FTH1    | Immune-B cells |
| 1.32E-39  | -0.807275  | 0.321 | 0.707 | 2.9E-35 | 34 | S100A6  | Immune-B cells |
| 3.805E-16 | -0.4453896 | 0.73  | 0.859 | 8.4E-12 | 34 | TMSB10  | Immune-B cells |
| 3.923E-51 | -0.8893915 | 0.401 | 0.806 | 8.7E-47 | 34 | MT-ND4L | Immune-B cells |
| 8.18E-46  | -0.7280083 | 0.738 | 0.925 | 1.8E-41 | 34 | MT-ND5  | Immune-B cells |

|           |            |       |       |         |    |         |                |
|-----------|------------|-------|-------|---------|----|---------|----------------|
| 1.929E-55 | -0.7608717 | 0.945 | 0.992 | 4.3E-51 | 34 | MT-CYB  | Immune-B cells |
| 2.001E-53 | -0.7581451 | 0.975 | 0.995 | 4.4E-49 | 34 | MT-ND2  | Immune-B cells |
| 3.577E-60 | -0.947763  | 0.776 | 0.964 | 7.9E-56 | 34 | MT-ND1  | Immune-B cells |
| 1.744E-67 | -0.7696702 | 0.996 | 1     | 3.9E-63 | 34 | MT-CO2  | Immune-B cells |
| 2.152E-56 | -0.8189788 | 1     | 0.999 | 4.8E-52 | 34 | MT-ND3  | Immune-B cells |
| 5.763E-66 | -0.8257652 | 0.996 | 0.999 | 1.3E-61 | 34 | MT-ND4  | Immune-B cells |
| 3.896E-72 | -0.9090737 | 0.996 | 1     | 8.6E-68 | 34 | MT-CO1  | Immune-B cells |
| 2.292E-78 | -0.9808115 | 0.92  | 0.994 | 5.1E-74 | 34 | MT-ATP6 | Immune-B cells |
| 1.251E-80 | -1.0741215 | 1     | 1     | 2.8E-76 | 34 | MT-CO3  | Immune-B cells |
| 0         | 4.33419407 | 1     | 0.029 | 0       | 35 | IGHG4   | Immune-B cells |
| 1.42E-180 | 2.97895423 | 0.896 | 0.18  | 3E-176  | 35 | IGKC    | Immune-B cells |
| 1.184E-45 | 2.69621173 | 0.383 | 0.09  | 2.6E-41 | 35 | IGLC2   | Immune-B cells |
| 7E-227    | 0.68350542 | 0.492 | 0.037 | 2E-222  | 35 | MZB1    | Immune-B cells |
| 3.62E-108 | 0.85350396 | 0.361 | 0.04  | 8E-104  | 35 | JCHAIN  | Immune-B cells |
| 7.574E-90 | 0.31778417 | 0.115 | 0.005 | 1.7E-85 | 35 | IGKV4-1 | Immune-B cells |
| 1.378E-68 | 1.08588839 | 0.727 | 0.265 | 3E-64   | 35 | SSR4    | Immune-B cells |
| 2.499E-68 | 0.33344679 | 0.268 | 0.034 | 5.5E-64 | 35 | PIM2    | Immune-B cells |
| 4.8E-76   | 0.33344685 | 0.339 | 0.048 | 1.1E-71 | 35 | FKBP11  | Immune-B cells |
| 1.187E-43 | 0.57113408 | 0.459 | 0.133 | 2.6E-39 | 35 | XBP1    | Immune-B cells |
| 3.094E-34 | 0.2817442  | 0.279 | 0.063 | 6.8E-30 | 35 | PRDX4   | Immune-B cells |
| 9.338E-32 | 0.30821253 | 0.388 | 0.116 | 2.1E-27 | 35 | SPCS3   | Immune-B cells |
| 9.44E-17  | 0.3730803  | 0.372 | 0.155 | 2.1E-12 | 35 | CCL5    | Immune-B cells |
| 8.508E-25 | 0.33489853 | 0.475 | 0.179 | 1.9E-20 | 35 | RGS1    | Immune-B cells |
| 1.86E-25  | 0.4454001  | 0.71  | 0.38  | 4.1E-21 | 35 | CYBA    | Immune-B cells |
| 6.533E-10 | 0.32610678 | 0.284 | 0.132 | 1.4E-05 | 35 | CCL4    | Immune-B cells |
| 7.226E-19 | 0.31235087 | 0.508 | 0.247 | 1.6E-14 | 35 | SPCS2   | Immune-B cells |
| 9.162E-38 | 0.57291287 | 1     | 0.95  | 2E-33   | 35 | B2M     | Immune-B cells |
| 2.259E-18 | 0.28809886 | 0.486 | 0.233 | 5E-14   | 35 | SPCS1   | Immune-B cells |
| 2.316E-16 | 0.33668145 | 0.59  | 0.354 | 5.1E-12 | 35 | SUB1    | Immune-B cells |
| 1.716E-09 | 0.34212855 | 0.792 | 0.71  | 3.8E-05 | 35 | HSP90AA | Immune-B cells |
| 1.527E-12 | 0.28980375 | 0.847 | 0.693 | 3.4E-08 | 35 | RPS26   | Immune-B cells |
| 9.237E-16 | 0.31411106 | 0.984 | 0.922 | 2E-11   | 35 | RPLP1   | Immune-B cells |
| 2.429E-10 | 0.27947227 | 0.88  | 0.752 | 5.4E-06 | 35 | RPL18A  | Immune-B cells |
| 1.903E-08 | 0.2557638  | 0.831 | 0.701 | 0.00042 | 35 | RPS2    | Immune-B cells |
| 0.000291  | 0.25344785 | 0.798 | 0.683 | 1       | 35 | FOS     | Immune-B cells |
| 3.817E-19 | -0.5896428 | 0.005 | 0.323 | 8.4E-15 | 35 | FXD2    | Immune-B cells |
| 8.516E-09 | -0.3437878 | 0.005 | 0.164 | 0.00019 | 35 | CXCL14  | Immune-B cells |
| 4.544E-24 | -0.988594  | 0.005 | 0.382 | 1E-19   | 35 | ATP1B1  | Immune-B cells |
| 1.609E-09 | -0.5557265 | 0.005 | 0.176 | 3.6E-05 | 35 | S100A2  | Immune-B cells |
| 1.548E-12 | -0.4146374 | 0.011 | 0.237 | 3.4E-08 | 35 | MT1E    | Immune-B cells |
| 1.672E-17 | -0.8181027 | 0.011 | 0.304 | 3.7E-13 | 35 | DEFB1   | Immune-B cells |
| 6.134E-11 | -0.4276832 | 0.016 | 0.216 | 1.4E-06 | 35 | CRYAB   | Immune-B cells |
| 5.463E-08 | -0.2657195 | 0.022 | 0.174 | 0.00121 | 35 | TIMP3   | Immune-B cells |
| 1.875E-19 | -0.5267299 | 0.022 | 0.344 | 4.1E-15 | 35 | CD24    | Immune-B cells |
| 2.563E-14 | -0.2987882 | 0.033 | 0.29  | 5.7E-10 | 35 | APP     | Immune-B cells |
| 2.632E-08 | -0.507234  | 0.011 | 0.163 | 0.00058 | 35 | IGFBP5  | Immune-B cells |
| 1.971E-09 | -0.3222308 | 0.022 | 0.2   | 4.4E-05 | 35 | GPX3    | Immune-B cells |
| 2.929E-11 | -0.2542618 | 0.044 | 0.258 | 6.5E-07 | 35 | PEBP1   | Immune-B cells |

|           |            |       |       |         |    |         |                |
|-----------|------------|-------|-------|---------|----|---------|----------------|
| 8.194E-12 | -0.4760428 | 0.022 | 0.241 | 1.8E-07 | 35 | MT1G    | Immune-B cells |
| 4.123E-16 | -0.8195428 | 0.016 | 0.294 | 9.1E-12 | 35 | WFDC2   | Immune-B cells |
| 5.798E-11 | -0.267352  | 0.044 | 0.253 | 1.3E-06 | 35 | MT-ATP8 | Immune-B cells |
| 3.559E-07 | -0.3413628 | 0.022 | 0.159 | 0.00786 | 35 | MMP7    | Immune-B cells |
| 2.485E-14 | -0.3427676 | 0.044 | 0.306 | 5.5E-10 | 35 | CD9     | Immune-B cells |
| 1.665E-11 | -0.2648784 | 0.06  | 0.286 | 3.7E-07 | 35 | NGFRAP1 | Immune-B cells |
| 7.699E-10 | -0.2697835 | 0.06  | 0.26  | 1.7E-05 | 35 | ATP1A1  | Immune-B cells |
| 2.062E-10 | -0.3822026 | 0.044 | 0.246 | 4.6E-06 | 35 | HES1    | Immune-B cells |
| 1.109E-10 | -0.2508081 | 0.126 | 0.361 | 2.5E-06 | 35 | LAPTM4A | Immune-B cells |
| 2.021E-11 | -0.2770284 | 0.12  | 0.355 | 4.5E-07 | 35 | COX5B   | Immune-B cells |
| 5.786E-09 | -0.2699464 | 0.126 | 0.322 | 0.00013 | 35 | RHOB    | Immune-B cells |
| 3.218E-10 | -0.2766114 | 0.164 | 0.387 | 7.1E-06 | 35 | PPDPF   | Immune-B cells |
| 7.364E-07 | -0.251801  | 0.158 | 0.332 | 0.01627 | 35 | CTSD    | Immune-B cells |
| 1.574E-11 | -0.5471613 | 0.066 | 0.292 | 3.5E-07 | 35 | CLU     | Immune-B cells |
| 3.766E-11 | -0.56933   | 0.077 | 0.302 | 8.3E-07 | 35 | ADIRF   | Immune-B cells |
| 7.679E-10 | -0.299472  | 0.23  | 0.452 | 1.7E-05 | 35 | S100A11 | Immune-B cells |
| 9.563E-08 | -0.2914186 | 0.224 | 0.428 | 0.00211 | 35 | CST3    | Immune-B cells |
| 1.089E-09 | -0.3082296 | 0.224 | 0.445 | 2.4E-05 | 35 | TXNIP   | Immune-B cells |
| 4.925E-08 | -0.3142782 | 0.202 | 0.393 | 0.00109 | 35 | IFITM3  | Immune-B cells |
| 1.627E-11 | -0.3687065 | 0.191 | 0.424 | 3.6E-07 | 35 | DSTN    | Immune-B cells |
| 1.313E-22 | -0.7472993 | 0.109 | 0.481 | 2.9E-18 | 35 | IGFBP7  | Immune-B cells |
| 1.608E-08 | -0.5191699 | 0.093 | 0.276 | 0.00036 | 35 | MT1X    | Immune-B cells |
| 2.348E-09 | -0.2882365 | 0.333 | 0.534 | 5.2E-05 | 35 | NDUFA4  | Immune-B cells |
| 8.344E-19 | -1.2664737 | 0.055 | 0.381 | 1.8E-14 | 35 | SPP1    | Immune-B cells |
| 2.551E-08 | -0.2774047 | 0.361 | 0.544 | 0.00056 | 35 | MYL6    | Immune-B cells |
| 3.198E-15 | -0.5224545 | 0.158 | 0.437 | 7.1E-11 | 35 | HSPB1   | Immune-B cells |
| 0.0003786 | -0.2711302 | 0.322 | 0.461 | 1       | 35 | CD74    | Immune-B cells |
| 6.294E-08 | -0.2531292 | 0.481 | 0.638 | 0.00139 | 35 | COX7C   | Immune-B cells |
| 4.714E-10 | -0.3018933 | 0.366 | 0.567 | 1E-05   | 35 | ATP5I   | Immune-B cells |
| 6.766E-10 | -0.2711884 | 0.607 | 0.801 | 1.5E-05 | 35 | FTH1    | Immune-B cells |
| 5.344E-07 | -0.2510183 | 0.76  | 0.859 | 0.01181 | 35 | TMSB10  | Immune-B cells |
| 1.856E-20 | -0.5083118 | 0.339 | 0.663 | 4.1E-16 | 35 | ITM2B   | Immune-B cells |
| 7.929E-15 | -0.7525721 | 0.235 | 0.513 | 1.8E-10 | 35 | MT2A    | Immune-B cells |
| 3.438E-23 | -0.6686118 | 0.383 | 0.707 | 7.6E-19 | 35 | S100A6  | Immune-B cells |
| 9.461E-34 | -0.8160406 | 0.448 | 0.805 | 2.1E-29 | 35 | MT-ND4L | Immune-B cells |
| 3.393E-34 | -0.7192162 | 0.71  | 0.925 | 7.5E-30 | 35 | MT-ND5  | Immune-B cells |
| 3.631E-47 | -0.703074  | 1     | 1     | 8E-43   | 35 | MT-CO2  | Immune-B cells |
| 6.312E-41 | -0.7365733 | 0.951 | 0.992 | 1.4E-36 | 35 | MT-CYB  | Immune-B cells |
| 8.308E-37 | -0.7248809 | 0.978 | 0.995 | 1.8E-32 | 35 | MT-ND2  | Immune-B cells |
| 2.547E-44 | -0.9261926 | 0.787 | 0.964 | 5.6E-40 | 35 | MT-ND1  | Immune-B cells |
| 1.013E-48 | -0.7996187 | 0.978 | 0.999 | 2.2E-44 | 35 | MT-ND4  | Immune-B cells |
| 5.639E-40 | -0.7967803 | 0.995 | 0.999 | 1.2E-35 | 35 | MT-ND3  | Immune-B cells |
| 4.191E-46 | -0.8092808 | 0.989 | 1     | 9.3E-42 | 35 | MT-CO1  | Immune-B cells |
| 8.147E-51 | -0.8727313 | 0.923 | 0.994 | 1.8E-46 | 35 | MT-ATP6 | Immune-B cells |
| 9.169E-09 | -0.275146  | 0.131 | 0.044 | 0.0002  | 35 | IGHA1   | Immune-B cells |
| 1.006E-60 | -1.0616175 | 1     | 1     | 2.2E-56 | 35 | MT-CO3  | Immune-B cells |
| 0         | 4.43684317 | 1     | 0.082 | 0       | 36 | IGHG3   | Immune-B cells |
| 4.07E-227 | 3.53874526 | 1     | 0.18  | 9E-223  | 36 | IGKC    | Immune-B cells |

|           |            |       |       |         |    |          |                |
|-----------|------------|-------|-------|---------|----|----------|----------------|
| 0         | 0.93026453 | 0.755 | 0.037 | 0       | 36 | MZB1     | Immune-B cells |
| 6.54E-223 | 1.04966655 | 0.528 | 0.039 | 1E-218  | 36 | JCHAIN   | Immune-B cells |
| 9.24E-134 | 0.41377995 | 0.147 | 0.005 | 2E-129  | 36 | IGKV4-1  | Immune-B cells |
| 1.57E-172 | 0.27892711 | 0.27  | 0.013 | 3E-168  | 36 | TNFRSF17 | Immune-B cells |
| 5.33E-114 | 1.33622935 | 0.89  | 0.264 | 1E-109  | 36 | SSR4     | Immune-B cells |
| 9.19E-126 | 0.38317381 | 0.374 | 0.034 | 2E-121  | 36 | PIM2     | Immune-B cells |
| 1.31E-107 | 0.8043561  | 0.681 | 0.133 | 3E-103  | 36 | XBP1     | Immune-B cells |
| 1.18E-110 | 0.35606701 | 0.423 | 0.048 | 3E-106  | 36 | FKBP11   | Immune-B cells |
| 5.048E-95 | 0.40534817 | 0.454 | 0.063 | 1.1E-90 | 36 | PRDX4    | Immune-B cells |
| 3.624E-66 | 0.40620512 | 0.54  | 0.116 | 8E-62   | 36 | SPCS3    | Immune-B cells |
| 1.251E-34 | 0.46716629 | 0.546 | 0.178 | 2.8E-30 | 36 | RGS1     | Immune-B cells |
| 8.458E-48 | 0.6126939  | 0.816 | 0.353 | 1.9E-43 | 36 | SUB1     | Immune-B cells |
| 3.527E-45 | 0.61500222 | 0.859 | 0.38  | 7.8E-41 | 36 | CYBA     | Immune-B cells |
| 2.419E-41 | 0.45264954 | 0.663 | 0.247 | 5.3E-37 | 36 | SPCS2    | Immune-B cells |
| 5.609E-34 | 0.41505582 | 0.546 | 0.195 | 1.2E-29 | 36 | HERPUD1  | Immune-B cells |
| 3.623E-29 | 0.26546105 | 0.331 | 0.086 | 8E-25   | 36 | PRDM1    | Immune-B cells |
| 3.739E-32 | 0.39433851 | 0.595 | 0.233 | 8.3E-28 | 36 | SPCS1    | Immune-B cells |
| 4.582E-23 | 0.26557682 | 0.368 | 0.122 | 1E-18   | 36 | SSR3     | Immune-B cells |
| 1.105E-14 | 0.26567916 | 0.264 | 0.09  | 2.4E-10 | 36 | IGLC2    | Immune-B cells |
| 4.811E-18 | 0.33789449 | 0.607 | 0.307 | 1.1E-13 | 36 | HSP90B1  | Immune-B cells |
| 1.291E-19 | 0.27264495 | 0.515 | 0.227 | 2.9E-15 | 36 | SEC61B   | Immune-B cells |
| 4.428E-16 | 0.27368906 | 0.466 | 0.214 | 9.8E-12 | 36 | BTG2     | Immune-B cells |
| 8.526E-15 | 0.27991108 | 0.528 | 0.27  | 1.9E-10 | 36 | TSC22D3  | Immune-B cells |
| 5.925E-13 | 0.27054355 | 0.65  | 0.391 | 1.3E-08 | 36 | SEC61G   | Immune-B cells |
| 3.524E-11 | 0.27518153 | 0.761 | 0.518 | 7.8E-07 | 36 | DUSP1    | Immune-B cells |
| 6.041E-21 | 0.37684174 | 1     | 0.95  | 1.3E-16 | 36 | B2M      | Immune-B cells |
| 7.318E-08 | 0.3055013  | 0.822 | 0.71  | 0.00162 | 36 | HSP90AA  | Immune-B cells |
| 9.521E-08 | 0.25134261 | 0.847 | 0.683 | 0.0021  | 36 | FOS      | Immune-B cells |
| 7.25E-16  | 0.29004579 | 0.988 | 0.922 | 1.6E-11 | 36 | RPLP1    | Immune-B cells |
| 1.805E-14 | 0.29918649 | 1     | 0.999 | 4E-10   | 36 | MALAT1   | Immune-B cells |
| 5.496E-08 | -0.3484918 | 0.006 | 0.164 | 0.00121 | 36 | CXCL14   | Immune-B cells |
| 1.164E-21 | -0.9932324 | 0.006 | 0.382 | 2.6E-17 | 36 | ATP1B1   | Immune-B cells |
| 4.038E-16 | -0.8227545 | 0.006 | 0.304 | 8.9E-12 | 36 | DEFB1    | Immune-B cells |
| 1.673E-08 | -0.5428473 | 0.006 | 0.176 | 0.00037 | 36 | S100A2   | Immune-B cells |
| 2.882E-07 | -0.356085  | 0.012 | 0.159 | 0.00637 | 36 | MMP7     | Immune-B cells |
| 6.788E-18 | -0.5353791 | 0.018 | 0.344 | 1.5E-13 | 36 | CD24     | Immune-B cells |
| 1.423E-07 | -0.2744042 | 0.018 | 0.174 | 0.00314 | 36 | TIMP3    | Immune-B cells |
| 6.952E-09 | -0.330907  | 0.018 | 0.2   | 0.00015 | 36 | GPX3     | Immune-B cells |
| 2.621E-16 | -0.5869359 | 0.018 | 0.323 | 5.8E-12 | 36 | FXD2     | Immune-B cells |
| 2.813E-12 | -0.2914458 | 0.037 | 0.286 | 6.2E-08 | 36 | NGFRAP1  | Immune-B cells |
| 3.045E-10 | -0.2549596 | 0.043 | 0.258 | 6.7E-06 | 36 | PEBP1    | Immune-B cells |
| 7.801E-10 | -0.2563381 | 0.043 | 0.253 | 1.7E-05 | 36 | MT-ATP8  | Immune-B cells |
| 3.146E-12 | -0.2942243 | 0.043 | 0.29  | 7E-08   | 36 | APP      | Immune-B cells |
| 2.99E-14  | -0.78683   | 0.018 | 0.294 | 6.6E-10 | 36 | WFDC2    | Immune-B cells |
| 2.315E-09 | -0.4249942 | 0.025 | 0.216 | 5.1E-05 | 36 | CRYAB    | Immune-B cells |
| 1.265E-12 | -0.3421723 | 0.049 | 0.305 | 2.8E-08 | 36 | CD9      | Immune-B cells |
| 4.052E-11 | -0.9864588 | 0.018 | 0.241 | 9E-07   | 36 | MT1G     | Immune-B cells |
| 1.702E-06 | -0.4813476 | 0.025 | 0.163 | 0.03761 | 36 | IGFBP5   | Immune-B cells |

|           |            |       |       |         |    |         |                |
|-----------|------------|-------|-------|---------|----|---------|----------------|
| 1.983E-13 | -0.32763   | 0.086 | 0.361 | 4.4E-09 | 36 | LAPTM4A | Immune-B cells |
| 6.606E-08 | -0.3925478 | 0.061 | 0.237 | 0.00146 | 36 | MT1E    | Immune-B cells |
| 3.721E-06 | -0.2818819 | 0.092 | 0.246 | 0.0822  | 36 | HES1    | Immune-B cells |
| 4.477E-11 | -0.309547  | 0.129 | 0.377 | 9.9E-07 | 36 | S100A10 | Immune-B cells |
| 1.185E-12 | -0.3103313 | 0.16  | 0.436 | 2.6E-08 | 36 | SKP1    | Immune-B cells |
| 1.863E-15 | -0.4487386 | 0.123 | 0.424 | 4.1E-11 | 36 | DSTN    | Immune-B cells |
| 8.438E-10 | -0.5355971 | 0.074 | 0.292 | 1.9E-05 | 36 | CLU     | Immune-B cells |
| 9.966E-12 | -0.3474607 | 0.184 | 0.452 | 2.2E-07 | 36 | S100A11 | Immune-B cells |
| 1.245E-06 | -0.2973443 | 0.16  | 0.332 | 0.02751 | 36 | CTSD    | Immune-B cells |
| 2.492E-09 | -0.5408997 | 0.086 | 0.302 | 5.5E-05 | 36 | ADIRF   | Immune-B cells |
| 1.17E-06  | -0.2587856 | 0.239 | 0.399 | 0.02584 | 36 | COX7B   | Immune-B cells |
| 5.527E-07 | -0.3048623 | 0.233 | 0.428 | 0.01221 | 36 | CST3    | Immune-B cells |
| 7.302E-06 | -0.2929585 | 0.227 | 0.393 | 0.16131 | 36 | IFITM3  | Immune-B cells |
| 7.182E-06 | -0.2531119 | 0.313 | 0.457 | 0.15868 | 36 | HLA-A   | Immune-B cells |
| 6.534E-10 | -0.3172205 | 0.288 | 0.525 | 1.4E-05 | 36 | ACTG1   | Immune-B cells |
| 3.475E-07 | -0.2964203 | 0.27  | 0.445 | 0.00768 | 36 | TXNIP   | Immune-B cells |
| 3.463E-10 | -0.3176263 | 0.319 | 0.544 | 7.7E-06 | 36 | MYL6    | Immune-B cells |
| 2.069E-07 | -0.2579223 | 0.411 | 0.567 | 0.00457 | 36 | ATP5I   | Immune-B cells |
| 2.527E-19 | -0.7408325 | 0.123 | 0.481 | 5.6E-15 | 36 | IGFBP7  | Immune-B cells |
| 2.399E-11 | -0.3457795 | 0.319 | 0.564 | 5.3E-07 | 36 | CALM2   | Immune-B cells |
| 1.969E-07 | -0.2865241 | 0.374 | 0.534 | 0.00435 | 36 | NDUFA4  | Immune-B cells |
| 2.122E-20 | -0.8500329 | 0.135 | 0.513 | 4.7E-16 | 36 | MT2A    | Immune-B cells |
| 1.396E-08 | -0.2972101 | 0.491 | 0.638 | 0.00031 | 36 | COX7C   | Immune-B cells |
| 7.166E-08 | -0.2522669 | 0.865 | 0.939 | 0.00158 | 36 | PTMA    | Immune-B cells |
| 2.559E-09 | -0.3167029 | 0.503 | 0.673 | 5.7E-05 | 36 | RPL31   | Immune-B cells |
| 3.403E-08 | -0.2618642 | 0.755 | 0.804 | 0.00075 | 36 | RPL37A  | Immune-B cells |
| 3.264E-08 | -0.4381679 | 0.258 | 0.437 | 0.00072 | 36 | HSPB1   | Immune-B cells |
| 1.075E-05 | -0.5461302 | 0.135 | 0.276 | 0.2375  | 36 | MT1X    | Immune-B cells |
| 1.325E-10 | -0.3500165 | 0.65  | 0.832 | 2.9E-06 | 36 | ACTB    | Immune-B cells |
| 9.651E-14 | -0.3257    | 0.798 | 0.932 | 2.1E-09 | 36 | EEF1A1  | Immune-B cells |
| 0.0095655 | -0.3394303 | 0.405 | 0.461 | 1       | 36 | CD74    | Immune-B cells |
| 4.952E-13 | -1.0728859 | 0.11  | 0.381 | 1.1E-08 | 36 | SPP1    | Immune-B cells |
| 6.093E-24 | -0.6191834 | 0.344 | 0.663 | 1.3E-19 | 36 | ITM2B   | Immune-B cells |
| 1.753E-26 | -0.7260999 | 0.313 | 0.707 | 3.9E-22 | 36 | S100A6  | Immune-B cells |
| 1.772E-09 | -0.3955422 | 0.742 | 0.859 | 3.9E-05 | 36 | TMSB10  | Immune-B cells |
| 1.115E-13 | -0.4811829 | 0.577 | 0.801 | 2.5E-09 | 36 | FTH1    | Immune-B cells |
| 1.298E-32 | -0.8604506 | 0.429 | 0.805 | 2.9E-28 | 36 | MT-ND4L | Immune-B cells |
| 1.492E-36 | -0.7948924 | 0.687 | 0.925 | 3.3E-32 | 36 | MT-ND5  | Immune-B cells |
| 1.654E-35 | -0.7590026 | 0.975 | 0.995 | 3.7E-31 | 36 | MT-ND2  | Immune-B cells |
| 1.439E-43 | -0.749976  | 1     | 1     | 3.2E-39 | 36 | MT-CO2  | Immune-B cells |
| 1.061E-44 | -0.9998764 | 0.755 | 0.964 | 2.3E-40 | 36 | MT-ND1  | Immune-B cells |
| 3.847E-45 | -0.8596289 | 0.933 | 0.992 | 8.5E-41 | 36 | MT-CYB  | Immune-B cells |
| 3.509E-50 | -0.8922466 | 0.988 | 0.999 | 7.8E-46 | 36 | MT-ND4  | Immune-B cells |
| 9.225E-52 | -0.9586247 | 0.945 | 0.994 | 2E-47   | 36 | MT-ATP6 | Immune-B cells |
| 1.346E-47 | -0.9726781 | 1     | 0.999 | 3E-43   | 36 | MT-ND3  | Immune-B cells |
| 1.817E-52 | -0.9786039 | 1     | 1     | 4E-48   | 36 | MT-CO1  | Immune-B cells |
| 3.183E-52 | -1.0425274 | 1     | 1     | 7E-48   | 36 | MT-CO3  | Immune-B cells |
| 2.313E-26 | -0.2672982 | 0.294 | 0.071 | 5.1E-22 | 36 | IGHG1   | Immune-B cells |

|           |            |       |       |          |    |          |                   |
|-----------|------------|-------|-------|----------|----|----------|-------------------|
| 6.094E-10 | -1.0036819 | 0.215 | 0.08  | 1.3E-05  | 36 | IGLC3    | Immune-B cells    |
| 0         | 1.18902424 | 0.488 | 0     | 0        | 37 | CPA3     | Immune-mast cells |
| 0         | 0.59481863 | 0.39  | 0     | 0        | 37 | MS4A2    | Immune-mast cells |
| 0         | 0.35233908 | 0.26  | 0     | 0        | 37 | SLC18A2  | Immune-mast cells |
| 0         | 1.83221291 | 0.87  | 0.001 | 0        | 37 | TPSB2    | Immune-mast cells |
| 0         | 1.63603008 | 0.862 | 0.001 | 0        | 37 | TPSAB1   | Immune-mast cells |
| 0         | 0.53357371 | 0.325 | 0.001 | 0        | 37 | HPGDS    | Immune-mast cells |
| 1.91E-154 | 0.39855858 | 0.341 | 0.018 | 4E-150   | 37 | KIT      | Immune-mast cells |
| 8.97E-50  | 0.37219201 | 0.187 | 0.017 | 2E-45    | 37 | HPGD     | Immune-mast cells |
| 1.502E-45 | 0.63745549 | 0.415 | 0.08  | 3.3E-41  | 37 | ALOX5AP  | Immune-mast cells |
| 1.586E-26 | 0.82153328 | 0.472 | 0.15  | 3.5E-22  | 37 | CD69     | Immune-mast cells |
| 3.426E-24 | 0.63655404 | 0.358 | 0.095 | 7.6E-20  | 37 | AREG     | Immune-mast cells |
| 1.704E-34 | 0.70773734 | 0.585 | 0.179 | 3.8E-30  | 37 | RGS1     | Immune-mast cells |
| 5.581E-28 | 0.40202561 | 0.301 | 0.065 | 1.2E-23  | 37 | SAMSN1   | Immune-mast cells |
| 1.253E-25 | 0.27757116 | 0.179 | 0.027 | 2.8E-21  | 37 | PTGS2    | Immune-mast cells |
| 2.565E-15 | 0.33043944 | 0.374 | 0.133 | 5.7E-11  | 37 | RGS2     | Immune-mast cells |
| 5.563E-10 | 0.5161977  | 0.561 | 0.329 | 1.2E-05  | 37 | SRGN     | Immune-mast cells |
| 2.578E-15 | 0.32033814 | 0.423 | 0.159 | 5.7E-11  | 37 | FCER1G   | Immune-mast cells |
| 1.425E-08 | 0.30476224 | 0.39  | 0.199 | 0.00031  | 37 | ANXA1    | Immune-mast cells |
| 5.796E-07 | 0.25685773 | 0.333 | 0.172 | 0.0128   | 37 | TNFAIP3  | Immune-mast cells |
| 4.742E-05 | 0.27012067 | 0.813 | 0.71  | 1        | 37 | HSP90AA  | Immune-mast cells |
| 0.0001227 | 0.2731655  | 0.715 | 0.637 | 1        | 37 | H3F3B    | Immune-mast cells |
| 5.363E-08 | 0.25298718 | 0.992 | 0.979 | 0.00118  | 37 | RPL34    | Immune-mast cells |
| 0.0005287 | -0.3260056 | 0.049 | 0.163 | 1        | 37 | MGP      | Immune-mast cells |
| 0.0033613 | -0.2505134 | 0.106 | 0.216 | 1        | 37 | CRYAB    | Immune-mast cells |
| 2.765E-05 | -0.5282979 | 0.13  | 0.293 | 0.61079  | 37 | WFDC2    | Immune-mast cells |
| 1.825E-07 | -0.4895281 | 0.26  | 0.481 | 0.00403  | 37 | IGFBP7   | Immune-mast cells |
| 1.87E-83  | 0.2890638  | 0.684 | 0.248 | 6.30E-79 | 24 | NARS     | Endothelial cells |
| 1.01E-217 | 0.28535932 | 0.284 | 0.03  | #####    | 24 | SLITRK4  | Endothelial cells |
| 4.77E-89  | 0.28450749 | 0.716 | 0.255 | 1.61E-84 | 24 | CD46     | Endothelial cells |
| 6.93E-220 | 0.2838974  | 0.31  | 0.035 | #####    | 24 | ST3GAL4  | Endothelial cells |
| 3.34E-181 | 0.28389301 | 0.322 | 0.044 | #####    | 24 | STXBP4   | Endothelial cells |
| 5.49E-129 | 0.28342573 | 0.396 | 0.081 | #####    | 24 | FABP3    | Endothelial cells |
| 1.97E-98  | 0.28167848 | 0.543 | 0.159 | 6.63E-94 | 24 | RAB3IP   | Endothelial cells |
| 2.08E-141 | 0.28024366 | 0.324 | 0.054 | #####    | 24 | SHISA3   | Endothelial cells |
| 7.93E-67  | 0.27967184 | 0.73  | 0.295 | 2.67E-62 | 24 | NDUFB3   | Endothelial cells |
| 2.78E-116 | 0.27815896 | 0.394 | 0.085 | #####    | 24 | PCP4     | Endothelial cells |
| 3.30E-133 | 0.27790775 | 0.513 | 0.123 | #####    | 24 | GOT1     | Endothelial cells |
| 7.71E-108 | 0.27740058 | 0.463 | 0.119 | #####    | 24 | PLA2G12A | Endothelial cells |
| 5.15E-78  | 0.27697292 | 0.716 | 0.262 | 1.73E-73 | 24 | TFCP2L1  | Endothelial cells |
| 1.63E-196 | 0.27510108 | 0.308 | 0.038 | #####    | 24 | CCSER1   | Endothelial cells |
| 6.16E-121 | 0.27497869 | 0.507 | 0.127 | #####    | 24 | SERINC2  | Endothelial cells |
| 1.72E-133 | 0.27480483 | 0.368 | 0.07  | #####    | 24 | ITGB5    | Endothelial cells |
| 9.01E-111 | 0.27430683 | 0.509 | 0.134 | #####    | 24 | TBC1D4   | Endothelial cells |
| 3.47E-130 | 0.27358752 | 0.34  | 0.063 | #####    | 24 | PRR15L   | Endothelial cells |
| 8.52E-83  | 0.27352864 | 0.445 | 0.13  | 2.87E-78 | 24 | RDH11    | Endothelial cells |
| 1.92E-103 | 0.27319478 | 0.453 | 0.118 | 6.46E-99 | 24 | AGPAT2   | Endothelial cells |
| 1.64E-139 | 0.27204874 | 0.59  | 0.146 | #####    | 24 | TACC1    | Endothelial cells |

|           |            |       |       |          |    |          |                   |
|-----------|------------|-------|-------|----------|----|----------|-------------------|
| 1.39E-26  | 0.27193851 | 0.938 | 0.617 | 4.68E-22 | 24 | ATP5L    | Endothelial cells |
| 2.06E-75  | 0.27177325 | 0.738 | 0.278 | 6.94E-71 | 24 | IVNS1ABP | Endothelial cells |
| 3.49E-45  | 0.27171205 | 1     | 1     | 1.18E-40 | 24 | MT-CO1   | Endothelial cells |
| 1.48E-153 | 0.27164518 | 0.322 | 0.05  | #####    | 24 | SELENBP1 | Endothelial cells |
| 2.95E-156 | 0.27068148 | 0.322 | 0.05  | #####    | 24 | CCDC71L  | Endothelial cells |
| 3.08E-140 | 0.27031461 | 0.372 | 0.067 | #####    | 24 | PVALB    | Endothelial cells |
| 7.22E-101 | 0.27023743 | 0.539 | 0.156 | 2.43E-96 | 24 | CRYL1    | Endothelial cells |
| 1.29E-49  | 0.27004305 | 0.809 | 0.389 | 4.35E-45 | 24 | ATP6VOB  | Endothelial cells |
| 2.12E-305 | 0.26853106 | 0.268 | 0.019 | #####    | 24 | LPL      | Endothelial cells |
| 2.29E-125 | 0.26850936 | 0.431 | 0.096 | #####    | 24 | MTR      | Endothelial cells |
| 1.89E-77  | 0.26779101 | 0.537 | 0.175 | 6.36E-73 | 24 | FKBP5    | Endothelial cells |
| 5.74E-93  | 0.26752471 | 0.376 | 0.094 | 1.93E-88 | 24 | NME4     | Endothelial cells |
| 4.20E-80  | 0.26750782 | 0.62  | 0.215 | 1.42E-75 | 24 | ECH1     | Endothelial cells |
| 1.57E-218 | 0.2673989  | 0.344 | 0.043 | #####    | 24 | DNAJC11  | Endothelial cells |
| 3.48E-73  | 0.26739505 | 0.634 | 0.235 | 1.17E-68 | 24 | TUFM     | Endothelial cells |
| 1.15E-80  | 0.26666665 | 0.748 | 0.283 | 3.89E-76 | 24 | ACADVL   | Endothelial cells |
| 3.72E-70  | 0.26523462 | 0.636 | 0.24  | 1.25E-65 | 24 | REEP5    | Endothelial cells |
| 1.62E-115 | 0.26516236 | 0.503 | 0.129 | #####    | 24 | SORL1    | Endothelial cells |
| 8.89E-109 | 0.26512795 | 0.417 | 0.1   | #####    | 24 | C1orf132 | Endothelial cells |
| 2.19E-181 | 0.26479441 | 0.324 | 0.044 | #####    | 24 | SYTL4    | Endothelial cells |
| 6.66E-164 | 0.26453385 | 0.366 | 0.06  | #####    | 24 | OSBPL3   | Endothelial cells |
| 1.04E-84  | 0.26329626 | 0.559 | 0.182 | 3.51E-80 | 24 | SDHD     | Endothelial cells |
| 4.52E-114 | 0.26264027 | 0.559 | 0.153 | #####    | 24 | SPPL2A   | Endothelial cells |
| 5.75E-118 | 0.26222241 | 0.453 | 0.106 | #####    | 24 | COL4A3   | Endothelial cells |
| 3.83E-44  | 0.26200572 | 0.805 | 0.386 | 1.29E-39 | 24 | MGST3    | Endothelial cells |
| 5.61E-181 | 0.26106627 | 0.318 | 0.043 | #####    | 24 | SLCO4C1  | Endothelial cells |
| 4.15E-111 | 0.26101156 | 0.433 | 0.105 | #####    | 24 | PDE4DIP  | Endothelial cells |
| 6.23E-96  | 0.26088203 | 0.602 | 0.191 | 2.10E-91 | 24 | HSPA9    | Endothelial cells |
| 9.98E-94  | 0.2604051  | 0.549 | 0.167 | 3.36E-89 | 24 | MDH2     | Endothelial cells |
| 2.34E-190 | 0.25957276 | 0.282 | 0.033 | #####    | 24 | GALNT18  | Endothelial cells |
| 1.41E-73  | 0.25897983 | 0.344 | 0.093 | 4.76E-69 | 24 | GNPMB    | Endothelial cells |
| 6.17E-178 | 0.25872532 | 0.316 | 0.043 | #####    | 24 | TMEM61   | Endothelial cells |
| 1.44E-65  | 0.25804862 | 0.706 | 0.287 | 4.84E-61 | 24 | GHITM    | Endothelial cells |
| 2.05E-100 | 0.25709002 | 0.394 | 0.096 | 6.91E-96 | 24 | ARHGEF28 | Endothelial cells |
| 9.54E-117 | 0.25690753 | 0.517 | 0.135 | #####    | 24 | CCDC47   | Endothelial cells |
| 4.28E-80  | 0.25647617 | 0.497 | 0.155 | 1.44E-75 | 24 | MGLL     | Endothelial cells |
| 4.08E-80  | 0.25580364 | 0.555 | 0.185 | 1.38E-75 | 24 | LRPAP1   | Endothelial cells |
| 7.52E-86  | 0.2555775  | 0.414 | 0.113 | 2.54E-81 | 24 | HOTAIRM1 | Endothelial cells |
| 2.46E-108 | 0.25518993 | 0.388 | 0.09  | #####    | 24 | NINJ1    | Endothelial cells |
| 2.66E-94  | 0.25494267 | 0.501 | 0.144 | 8.95E-90 | 24 | C7orf55  | Endothelial cells |
| 2.17E-105 | 0.25489945 | 0.451 | 0.115 | #####    | 24 | MICU2    | Endothelial cells |
| 2.74E-33  | 0.25473043 | 0.907 | 0.524 | 9.24E-29 | 24 | ATP5J    | Endothelial cells |
| 1.63E-93  | 0.25443972 | 0.372 | 0.092 | 5.50E-89 | 24 | MRPL36   | Endothelial cells |
| 2.28E-136 | 0.25441781 | 0.398 | 0.079 | #####    | 24 | CMBL     | Endothelial cells |
| 2.52E-107 | 0.25364191 | 0.499 | 0.133 | #####    | 24 | KIAA1109 | Endothelial cells |
| 1.15E-198 | 0.25320846 | 0.258 | 0.027 | #####    | 24 | TMEM171  | Endothelial cells |
| 3.17E-96  | 0.25310878 | 0.318 | 0.069 | 1.07E-91 | 24 | ALDH1L1  | Endothelial cells |
| 4.21E-186 | 0.25276583 | 0.298 | 0.038 | #####    | 24 | TMEM45B  | Endothelial cells |

|           |            |       |       |          |    |          |                   |
|-----------|------------|-------|-------|----------|----|----------|-------------------|
| 2.45E-70  | 0.25151702 | 0.688 | 0.265 | 8.24E-66 | 24 | PTTG1IP  | Endothelial cells |
| 7.54E-36  | 0.25102845 | 0.839 | 0.436 | 2.54E-31 | 24 | NPM1     | Endothelial cells |
| 0         | 2.41187551 | 0.809 | 0.138 | 0        | 25 | CTGF     | Immune-NK cells   |
| 0         | 1.53835099 | 0.686 | 0.082 | 0        | 25 | BGN      | Immune-NK cells   |
| 0         | 1.40640531 | 0.503 | 0.019 | 0        | 25 | CFH      | Immune-NK cells   |
| 0         | 1.39494331 | 0.696 | 0.123 | 0        | 25 | VCAM1    | Immune-NK cells   |
| 2.85E-162 | 1.36708505 | 0.803 | 0.367 | #####    | 25 | TPM1     | Immune-NK cells   |
| 0         | 1.3370031  | 0.444 | 0.029 | 0        | 25 | TNNT2    | Immune-NK cells   |
| 4.85E-178 | 1.32141044 | 0.97  | 0.704 | #####    | 25 | IGFBP7   | Immune-NK cells   |
| 0         | 1.29108836 | 0.56  | 0.084 | 0        | 25 | CYP1B1   | Immune-NK cells   |
| 1.78E-227 | 1.28161582 | 0.665 | 0.158 | #####    | 25 | NUPR1    | Immune-NK cells   |
| 3.21E-96  | 1.27917326 | 0.665 | 0.289 | 1.08E-91 | 25 | MMP7     | Immune-NK cells   |
| 1.53E-163 | 1.24571179 | 0.791 | 0.301 | #####    | 25 | VIM      | Immune-NK cells   |
| 3.48E-162 | 1.21429409 | 0.615 | 0.181 | #####    | 25 | CTSC     | Immune-NK cells   |
| 8.81E-201 | 1.20088692 | 0.738 | 0.211 | #####    | 25 | PDZK1IP1 | Immune-NK cells   |
| 0         | 1.17024717 | 0.394 | 0.016 | 0        | 25 | DAPL1    | Immune-NK cells   |
| 0         | 1.15247701 | 0.288 | 0.009 | 0        | 25 | KRT17    | Immune-NK cells   |
| 0         | 1.11600526 | 0.306 | 0.009 | 0        | 25 | SFRP2    | Immune-NK cells   |
| 4.97E-297 | 1.06565709 | 0.485 | 0.065 | #####    | 25 | THY1     | Immune-NK cells   |
| 8.82E-134 | 1.05185987 | 0.698 | 0.242 | #####    | 25 | TIMP1    | Immune-NK cells   |
| 4.68E-137 | 1.03045577 | 0.897 | 0.456 | #####    | 25 | IFITM3   | Immune-NK cells   |
| 2.44E-264 | 1.02205648 | 0.489 | 0.072 | #####    | 25 | CDH6     | Immune-NK cells   |
| 1.89E-99  | 1.01602535 | 0.718 | 0.308 | 6.35E-95 | 25 | LGALS1   | Immune-NK cells   |
| 1.73E-194 | 1.01507352 | 0.702 | 0.183 | #####    | 25 | SPARC    | Immune-NK cells   |
| 0         | 1.00336249 | 0.454 | 0.043 | 0        | 25 | CLDN1    | Immune-NK cells   |
| 2.09E-170 | 0.98256058 | 0.663 | 0.181 | #####    | 25 | MGP      | Immune-NK cells   |
| 0         | 0.97160114 | 0.318 | 0.022 | 0        | 25 | COL1A1   | Immune-NK cells   |
| 0         | 0.96107    | 0.377 | 0.026 | 0        | 25 | COL3A1   | Immune-NK cells   |
| 4.62E-278 | 0.95514389 | 0.442 | 0.058 | #####    | 25 | SPON2    | Immune-NK cells   |
| 1.76E-115 | 0.91924505 | 0.594 | 0.193 | #####    | 25 | THBS1    | Immune-NK cells   |
| 3.05E-181 | 0.91615277 | 0.659 | 0.171 | #####    | 25 | MYL9     | Immune-NK cells   |
| 8.07E-76  | 0.88450133 | 0.641 | 0.303 | 2.72E-71 | 25 | BCAM     | Immune-NK cells   |
| 1.60E-120 | 0.87226204 | 0.588 | 0.176 | #####    | 25 | UGT2B7   | Immune-NK cells   |
| 0         | 0.87079529 | 0.4   | 0.037 | 0        | 25 | AEBP1    | Immune-NK cells   |
| 9.68E-84  | 0.86917081 | 0.4   | 0.116 | 3.26E-79 | 25 | CCL2     | Immune-NK cells   |
| 2.51E-108 | 0.86875421 | 0.667 | 0.241 | #####    | 25 | IL32     | Immune-NK cells   |
| 3.81E-126 | 0.85104254 | 0.497 | 0.133 | #####    | 25 | IGFBP2   | Immune-NK cells   |
| 1.45E-145 | 0.809881   | 0.548 | 0.139 | #####    | 25 | AKAP12   | Immune-NK cells   |
| 0         | 0.80747418 | 0.337 | 0.014 | 0        | 25 | KLK6     | Immune-NK cells   |
| 7.48E-152 | 0.78801932 | 0.365 | 0.066 | #####    | 25 | NPR3     | Immune-NK cells   |
| 1.94E-127 | 0.78800466 | 0.493 | 0.133 | #####    | 25 | PLA2G16  | Immune-NK cells   |
| 5.18E-109 | 0.78422687 | 0.963 | 0.798 | #####    | 25 | TMSB10   | Immune-NK cells   |
| 7.55E-68  | 0.78292877 | 0.653 | 0.328 | 2.55E-63 | 25 | ANXA2    | Immune-NK cells   |
| 1.26E-276 | 0.78242212 | 0.363 | 0.038 | #####    | 25 | SPOCK2   | Immune-NK cells   |
| 8.85E-128 | 0.77661067 | 0.507 | 0.135 | #####    | 25 | MYLK     | Immune-NK cells   |
| 1.14E-91  | 0.75904534 | 0.604 | 0.234 | 3.85E-87 | 25 | CRIM1    | Immune-NK cells   |
| 1.07E-82  | 0.73706164 | 0.765 | 0.393 | 3.61E-78 | 25 | S100A13  | Immune-NK cells   |
| 5.63E-169 | 0.72069728 | 0.513 | 0.108 | #####    | 25 | TAGLN    | Immune-NK cells   |

|           |            |       |       |          |    |          |                 |
|-----------|------------|-------|-------|----------|----|----------|-----------------|
| 2.25E-121 | 0.71628666 | 0.434 | 0.107 | #####    | 25 | PRKCDBP  | Immune-NK cells |
| 1.71E-82  | 0.71309807 | 0.556 | 0.214 | 5.76E-78 | 25 | HCFC1R1  | Immune-NK cells |
| 1.71E-193 | 0.71187562 | 0.389 | 0.06  | #####    | 25 | VCAN     | Immune-NK cells |
| 2.52E-88  | 0.70678748 | 0.886 | 0.634 | 8.48E-84 | 25 | RPL10A   | Immune-NK cells |
| 5.41E-84  | 0.70377065 | 0.736 | 0.346 | 1.82E-79 | 25 | GPX3     | Immune-NK cells |
| 1.69E-74  | 0.69488218 | 0.586 | 0.25  | 5.71E-70 | 25 | CD151    | Immune-NK cells |
| 8.80E-76  | 0.69336177 | 0.371 | 0.112 | 2.96E-71 | 25 | PRSS23   | Immune-NK cells |
| 5.96E-89  | 0.6916608  | 0.485 | 0.16  | 2.01E-84 | 25 | SYNE1    | Immune-NK cells |
| 5.13E-104 | 0.68483413 | 0.493 | 0.146 | 1.73E-99 | 25 | LY6E     | Immune-NK cells |
| 6.89E-186 | 0.67725683 | 0.331 | 0.047 | #####    | 25 | FHL2     | Immune-NK cells |
| 1.25E-80  | 0.67606145 | 0.503 | 0.183 | 4.22E-76 | 25 | S100A16  | Immune-NK cells |
| 1.20E-123 | 0.67541167 | 0.406 | 0.091 | #####    | 25 | C1orf186 | Immune-NK cells |
| 5.41E-93  | 0.6737584  | 0.501 | 0.166 | 1.82E-88 | 25 | PAWR     | Immune-NK cells |
| 1.16E-90  | 0.66537858 | 0.481 | 0.154 | 3.93E-86 | 25 | SDC2     | Immune-NK cells |
| 4.86E-65  | 0.66093882 | 0.613 | 0.272 | 1.64E-60 | 25 | KRT19    | Immune-NK cells |
| 4.83E-125 | 0.65366058 | 0.361 | 0.076 | #####    | 25 | GPC4     | Immune-NK cells |
| 9.54E-82  | 0.65183567 | 0.903 | 0.731 | 3.21E-77 | 25 | RPS4X    | Immune-NK cells |
| 4.20E-58  | 0.6461355  | 0.292 | 0.087 | 1.41E-53 | 25 | PCP4     | Immune-NK cells |
| 1.55E-85  | 0.64586704 | 0.921 | 0.756 | 5.21E-81 | 25 | RPL3     | Immune-NK cells |
| 7.92E-83  | 0.64038803 | 0.469 | 0.156 | 2.67E-78 | 25 | NEDD9    | Immune-NK cells |
| 4.76E-121 | 0.63498689 | 0.365 | 0.078 | #####    | 25 | FSTL1    | Immune-NK cells |
| 4.49E-126 | 0.63271018 | 0.337 | 0.065 | #####    | 25 | CCND2    | Immune-NK cells |
| 2.29E-93  | 0.62967471 | 0.485 | 0.148 | 7.71E-89 | 25 | EMP3     | Immune-NK cells |
| 2.64E-87  | 0.62725002 | 0.495 | 0.163 | 8.89E-83 | 25 | NFIA     | Immune-NK cells |
| 4.64E-76  | 0.62576844 | 0.511 | 0.183 | 1.56E-71 | 25 | TNFSF10  | Immune-NK cells |
| 5.57E-103 | 0.62295064 | 0.343 | 0.078 | 1.88E-98 | 25 | GMDS     | Immune-NK cells |
| 3.14E-42  | 0.62271697 | 0.708 | 0.449 | 1.06E-37 | 25 | HIST1H4C | Immune-NK cells |
| 4.59E-32  | 0.62098032 | 0.6   | 0.356 | 1.55E-27 | 25 | CEBPD    | Immune-NK cells |
| 9.98E-122 | 0.61529706 | 0.456 | 0.113 | #####    | 25 | PALLD    | Immune-NK cells |
| 1.84E-95  | 0.61481227 | 0.32  | 0.074 | 6.20E-91 | 25 | DCBLD2   | Immune-NK cells |
| 4.29E-77  | 0.6132355  | 0.801 | 0.41  | 1.44E-72 | 25 | CRYAB    | Immune-NK cells |
| 2.19E-67  | 0.61148388 | 0.513 | 0.198 | 7.39E-63 | 25 | BICC1    | Immune-NK cells |
| 8.83E-95  | 0.61039828 | 0.97  | 0.861 | 2.98E-90 | 25 | RPL10    | Immune-NK cells |
| 4.59E-95  | 0.60902378 | 0.438 | 0.125 | 1.55E-90 | 25 | COL4A1   | Immune-NK cells |
| 4.90E-89  | 0.60027957 | 0.957 | 0.833 | 1.65E-84 | 25 | RPS8     | Immune-NK cells |
| 1.32E-49  | 0.59821739 | 0.746 | 0.489 | 4.46E-45 | 25 | RPLP0    | Immune-NK cells |
| 2.09E-90  | 0.59733003 | 0.418 | 0.12  | 7.04E-86 | 25 | COL4A2   | Immune-NK cells |
| 5.95E-69  | 0.5968096  | 0.874 | 0.625 | 2.00E-64 | 25 | RPL29    | Immune-NK cells |
| 1.16E-91  | 0.5889249  | 0.957 | 0.809 | 3.92E-87 | 25 | RPL12    | Immune-NK cells |
| 1.32E-62  | 0.58871441 | 0.872 | 0.631 | 4.44E-58 | 25 | MYL6     | Immune-NK cells |
| 4.33E-241 | 0.58678236 | 0.306 | 0.032 | #####    | 25 | BHLHE41  | Immune-NK cells |
| 3.12E-65  | 0.58544559 | 0.87  | 0.66  | 1.05E-60 | 25 | RPS3     | Immune-NK cells |
| 3.78E-95  | 0.58207774 | 0.961 | 0.863 | 1.27E-90 | 25 | RPL13A   | Immune-NK cells |
| 2.70E-68  | 0.58032941 | 0.895 | 0.644 | 9.11E-64 | 25 | RPS16    | Immune-NK cells |
| 7.17E-109 | 0.58026635 | 0.436 | 0.112 | #####    | 25 | ASS1     | Immune-NK cells |
| 4.94E-228 | 0.57891297 | 0.375 | 0.047 | #####    | 25 | PTGDS    | Immune-NK cells |
| 3.34E-114 | 0.57664169 | 0.712 | 0.245 | #####    | 25 | CALD1    | Immune-NK cells |
| 9.49E-67  | 0.57622855 | 0.452 | 0.164 | 3.20E-62 | 25 | DCDC2    | Immune-NK cells |

|           |            |       |       |          |    |           |                 |
|-----------|------------|-------|-------|----------|----|-----------|-----------------|
| 8.25E-245 | 0.5733384  | 0.31  | 0.032 | #####    | 25 | TSPAN5    | Immune-NK cells |
| 1.04E-59  | 0.57190593 | 0.86  | 0.614 | 3.50E-55 | 25 | RPL5      | Immune-NK cells |
| 3.32E-159 | 0.56895881 | 0.335 | 0.053 | #####    | 25 | CDH2      | Immune-NK cells |
| 2.38E-51  | 0.56371513 | 0.793 | 0.555 | 8.02E-47 | 25 | GNB2L1    | Immune-NK cells |
| 5.61E-62  | 0.55875532 | 0.872 | 0.619 | 1.89E-57 | 25 | RPL14     | Immune-NK cells |
| 5.07E-54  | 0.55874607 | 0.862 | 0.669 | 1.71E-49 | 25 | RPS2      | Immune-NK cells |
| 1.23E-47  | 0.55335108 | 0.714 | 0.419 | 4.14E-43 | 25 | MT1E      | Immune-NK cells |
| 2.21E-136 | 0.55324753 | 0.296 | 0.048 | #####    | 25 | COL6A2    | Immune-NK cells |
| 7.68E-64  | 0.55094055 | 0.436 | 0.158 | 2.59E-59 | 25 | FLNA      | Immune-NK cells |
| 2.88E-54  | 0.55089283 | 0.556 | 0.258 | 9.70E-50 | 25 | ANXA5     | Immune-NK cells |
| 5.03E-68  | 0.54946264 | 0.917 | 0.725 | 1.70E-63 | 25 | RPL18A    | Immune-NK cells |
| 9.92E-157 | 0.54847333 | 0.288 | 0.041 | #####    | 25 | NPR1      | Immune-NK cells |
| 5.97E-72  | 0.54794012 | 0.359 | 0.107 | 2.01E-67 | 25 | NFRSF11B  | Immune-NK cells |
| 9.08E-128 | 0.54759454 | 0.375 | 0.076 | #####    | 25 | CAV1      | Immune-NK cells |
| 3.58E-58  | 0.54640629 | 0.864 | 0.625 | 1.21E-53 | 25 | RPS5      | Immune-NK cells |
| 9.65E-72  | 0.54407756 | 0.422 | 0.137 | 3.25E-67 | 25 | PDE1A     | Immune-NK cells |
| 1.67E-48  | 0.54322884 | 0.748 | 0.482 | 5.64E-44 | 25 | RPSA      | Immune-NK cells |
| 2.89E-118 | 0.5408463  | 0.3   | 0.056 | #####    | 25 | C21orf62  | Immune-NK cells |
| 2.61E-87  | 0.54052114 | 0.402 | 0.113 | 8.79E-83 | 25 | SYCE1L    | Immune-NK cells |
| 1.23E-75  | 0.53866903 | 0.933 | 0.764 | 4.16E-71 | 25 | RPL35A    | Immune-NK cells |
| 1.00E-59  | 0.5339879  | 0.87  | 0.712 | 3.37E-55 | 25 | RPL15     | Immune-NK cells |
| 1.59E-55  | 0.53350331 | 0.844 | 0.598 | 5.37E-51 | 25 | RPL7A     | Immune-NK cells |
| 1.05E-51  | 0.53278642 | 0.629 | 0.308 | 3.52E-47 | 25 | IFITM2    | Immune-NK cells |
| 9.69E-69  | 0.52524682 | 0.941 | 0.83  | 3.27E-64 | 25 | RPS12     | Immune-NK cells |
| 7.45E-144 | 0.52349767 | 0.258 | 0.036 | #####    | 25 | TNC       | Immune-NK cells |
| 8.86E-83  | 0.52206953 | 0.966 | 0.88  | 2.98E-78 | 25 | RPS18     | Immune-NK cells |
| 1.12E-46  | 0.52154005 | 0.538 | 0.26  | 3.76E-42 | 25 | ARHGAP29  | Immune-NK cells |
| 4.51E-28  | 0.52021186 | 0.639 | 0.403 | 1.52E-23 | 25 | TSC22D1   | Immune-NK cells |
| 1.12E-165 | 0.51853768 | 0.29  | 0.039 | #####    | 25 | PAG1      | Immune-NK cells |
| 8.42E-56  | 0.51815856 | 0.854 | 0.614 | 2.84E-51 | 25 | RPL24     | Immune-NK cells |
| 4.97E-39  | 0.51795293 | 0.694 | 0.439 | 1.68E-34 | 25 | MYL12A    | Immune-NK cells |
| 3.13E-57  | 0.51780721 | 0.935 | 0.805 | 1.05E-52 | 25 | ITM2B     | Immune-NK cells |
| 6.10E-69  | 0.51680291 | 0.941 | 0.82  | 2.05E-64 | 25 | RPL26     | Immune-NK cells |
| 2.13E-54  | 0.51552118 | 0.864 | 0.669 | 7.17E-50 | 25 | RPS9      | Immune-NK cells |
| 9.19E-83  | 0.51542098 | 0.375 | 0.105 | 3.10E-78 | 25 | ACTN1     | Immune-NK cells |
| 3.30E-71  | 0.51276241 | 0.957 | 0.843 | 1.11E-66 | 25 | RPS19     | Immune-NK cells |
| 3.40E-76  | 0.51205871 | 0.292 | 0.073 | 1.15E-71 | 25 | PDLIM7    | Immune-NK cells |
| 8.96E-47  | 0.51013474 | 0.748 | 0.471 | 3.02E-42 | 25 | RPL4      | Immune-NK cells |
| 3.15E-44  | 0.5098281  | 0.659 | 0.362 | 1.06E-39 | 25 | PHPT1     | Immune-NK cells |
| 6.64E-47  | 0.50889901 | 0.525 | 0.245 | 2.24E-42 | 25 | ARID5B    | Immune-NK cells |
| 7.99E-62  | 0.5080749  | 0.917 | 0.732 | 2.69E-57 | 25 | RPL19     | Immune-NK cells |
| 2.56E-92  | 0.50552132 | 0.312 | 0.073 | 8.61E-88 | 25 | SLC48A1   | Immune-NK cells |
| 1.05E-69  | 0.50048914 | 0.949 | 0.801 | 3.53E-65 | 25 | RPL11     | Immune-NK cells |
| 1.37E-105 | 0.49962791 | 0.292 | 0.058 | #####    | 25 | RERG      | Immune-NK cells |
| 1.98E-42  | 0.49815171 | 0.815 | 0.558 | 6.67E-38 | 25 | LAPTM4A   | Immune-NK cells |
| 1.29E-77  | 0.49140519 | 0.976 | 0.871 | 4.36E-73 | 25 | RPL13     | Immune-NK cells |
| 2.77E-39  | 0.48932733 | 0.363 | 0.152 | 9.34E-35 | 25 | C14orf105 | Immune-NK cells |
| 4.47E-69  | 0.488451   | 0.558 | 0.211 | 1.51E-64 | 25 | ANXA1     | Immune-NK cells |

|           |            |       |       |          |    |         |                 |
|-----------|------------|-------|-------|----------|----|---------|-----------------|
| 4.91E-53  | 0.48605647 | 0.355 | 0.124 | 1.66E-48 | 25 | PLEKHH2 | Immune-NK cells |
| 1.54E-64  | 0.48569578 | 0.929 | 0.787 | 5.18E-60 | 25 | RPS15A  | Immune-NK cells |
| 8.06E-41  | 0.4850647  | 0.564 | 0.3   | 2.71E-36 | 25 | CLTA    | Immune-NK cells |
| 4.69E-68  | 0.48494166 | 0.927 | 0.641 | 1.58E-63 | 25 | MT2A    | Immune-NK cells |
| 1.61E-78  | 0.48485674 | 0.357 | 0.099 | 5.41E-74 | 25 | NREP    | Immune-NK cells |
| 8.32E-80  | 0.48442887 | 0.974 | 0.868 | 2.80E-75 | 25 | RPL32   | Immune-NK cells |
| 1.04E-79  | 0.47951113 | 0.448 | 0.139 | 3.50E-75 | 25 | PTRF    | Immune-NK cells |
| 2.18E-51  | 0.4773017  | 0.408 | 0.159 | 7.33E-47 | 25 | TSPAN12 | Immune-NK cells |
| 3.17E-68  | 0.4754739  | 0.951 | 0.845 | 1.07E-63 | 25 | RPS6    | Immune-NK cells |
| 4.54E-53  | 0.47533045 | 0.909 | 0.725 | 1.53E-48 | 25 | RPS17   | Immune-NK cells |
| 1.42E-53  | 0.46447573 | 0.937 | 0.763 | 4.79E-49 | 25 | RPL31   | Immune-NK cells |
| 1.43E-49  | 0.46410347 | 0.436 | 0.18  | 4.83E-45 | 25 | EIF3M   | Immune-NK cells |
| 8.62E-138 | 0.46380948 | 0.274 | 0.041 | #####    | 25 | ADGRG6  | Immune-NK cells |
| 5.96E-42  | 0.46229718 | 0.42  | 0.18  | 2.01E-37 | 25 | ERRFI1  | Immune-NK cells |
| 2.22E-27  | 0.4606986  | 0.347 | 0.166 | 7.47E-23 | 25 | NTN4    | Immune-NK cells |
| 1.90E-77  | 0.46039644 | 0.367 | 0.102 | 6.41E-73 | 25 | IGFBP4  | Immune-NK cells |
| 1.15E-51  | 0.4599818  | 0.556 | 0.244 | 3.86E-47 | 25 | SPATS2L | Immune-NK cells |
| 4.47E-36  | 0.45865447 | 0.688 | 0.413 | 1.51E-31 | 25 | TMEM258 | Immune-NK cells |
| 2.23E-65  | 0.4557981  | 0.957 | 0.862 | 7.52E-61 | 25 | RPS28   | Immune-NK cells |
| 4.37E-35  | 0.45568342 | 0.471 | 0.235 | 1.47E-30 | 25 | TUBB    | Immune-NK cells |
| 1.01E-48  | 0.45555647 | 0.899 | 0.747 | 3.41E-44 | 25 | RPL7    | Immune-NK cells |
| 1.26E-46  | 0.45419571 | 0.85  | 0.632 | 4.24E-42 | 25 | RPL18   | Immune-NK cells |
| 5.23E-48  | 0.45203585 | 0.448 | 0.186 | 1.76E-43 | 25 | RARRES2 | Immune-NK cells |
| 3.88E-61  | 0.45010271 | 0.59  | 0.26  | 1.31E-56 | 25 | MT1F    | Immune-NK cells |
| 2.22E-38  | 0.44936013 | 0.795 | 0.543 | 7.49E-34 | 25 | EEF1D   | Immune-NK cells |
| 1.70E-51  | 0.44539596 | 0.903 | 0.721 | 5.72E-47 | 25 | RPL27A  | Immune-NK cells |
| 7.00E-62  | 0.4440409  | 0.953 | 0.834 | 2.36E-57 | 25 | RPS23   | Immune-NK cells |
| 1.85E-37  | 0.44381301 | 0.795 | 0.554 | 6.25E-33 | 25 | PFDN5   | Immune-NK cells |
| 1.04E-85  | 0.44347576 | 0.276 | 0.06  | 3.51E-81 | 25 | CCDC80  | Immune-NK cells |
| 1.07E-53  | 0.44266137 | 0.458 | 0.18  | 3.61E-49 | 25 | ITGB8   | Immune-NK cells |
| 2.65E-48  | 0.43969706 | 0.29  | 0.095 | 8.93E-44 | 25 | PROM1   | Immune-NK cells |
| 3.23E-111 | 0.43835066 | 0.256 | 0.043 | #####    | 25 | HRCT1   | Immune-NK cells |
| 2.24E-31  | 0.43623665 | 0.667 | 0.422 | 7.55E-27 | 25 | EEF2    | Immune-NK cells |
| 1.76E-40  | 0.4361699  | 0.436 | 0.194 | 5.94E-36 | 25 | CEBPB   | Immune-NK cells |
| 6.10E-85  | 0.43596934 | 0.377 | 0.099 | 2.06E-80 | 25 | TPM2    | Immune-NK cells |
| 1.15E-251 | 0.43594156 | 0.252 | 0.02  | #####    | 25 | TSHZ2   | Immune-NK cells |
| 4.42E-33  | 0.43528016 | 0.706 | 0.449 | 1.49E-28 | 25 | BTF3    | Immune-NK cells |
| 7.68E-70  | 0.43490179 | 0.254 | 0.06  | 2.59E-65 | 25 | MAP7D3  | Immune-NK cells |
| 6.03E-76  | 0.43463797 | 0.258 | 0.059 | 2.03E-71 | 25 | ABCC3   | Immune-NK cells |
| 4.07E-46  | 0.43398697 | 0.895 | 0.731 | 1.37E-41 | 25 | RPL6    | Immune-NK cells |
| 8.86E-44  | 0.43306488 | 0.448 | 0.194 | 2.98E-39 | 25 | UGCG    | Immune-NK cells |
| 2.86E-45  | 0.4328532  | 0.542 | 0.254 | 9.63E-41 | 25 | PTMS    | Immune-NK cells |
| 1.28E-62  | 0.43236588 | 0.968 | 0.897 | 4.31E-58 | 25 | RPL21   | Immune-NK cells |
| 6.25E-40  | 0.43212713 | 0.483 | 0.231 | 2.10E-35 | 25 | ARPC5   | Immune-NK cells |
| 1.40E-48  | 0.4305801  | 0.375 | 0.141 | 4.70E-44 | 25 | FAT1    | Immune-NK cells |
| 2.20E-35  | 0.42984003 | 0.742 | 0.495 | 7.42E-31 | 25 | HNRNPA1 | Immune-NK cells |
| 1.42E-41  | 0.4285279  | 0.598 | 0.311 | 4.79E-37 | 25 | ZFAS1   | Immune-NK cells |
| 3.82E-39  | 0.42531922 | 0.819 | 0.6   | 1.29E-34 | 25 | RPL23   | Immune-NK cells |

|           |            |       |       |          |    |         |                 |
|-----------|------------|-------|-------|----------|----|---------|-----------------|
| 1.60E-38  | 0.42438068 | 0.517 | 0.26  | 5.38E-34 | 25 | NR2F2   | Immune-NK cells |
| 1.01E-48  | 0.42389376 | 0.359 | 0.131 | 3.40E-44 | 25 | ITGA3   | Immune-NK cells |
| 5.99E-47  | 0.42335215 | 0.905 | 0.74  | 2.02E-42 | 25 | RPS3A   | Immune-NK cells |
| 6.31E-61  | 0.42185077 | 0.966 | 0.87  | 2.13E-56 | 25 | RPLP1   | Immune-NK cells |
| 2.03E-52  | 0.42085561 | 0.929 | 0.808 | 6.84E-48 | 25 | RPS25   | Immune-NK cells |
| 2.47E-76  | 0.41958391 | 0.996 | 0.952 | 8.33E-72 | 25 | RPL34   | Immune-NK cells |
| 1.53E-31  | 0.41946779 | 0.726 | 0.464 | 5.16E-27 | 25 | MYL12B  | Immune-NK cells |
| 3.66E-32  | 0.41897862 | 0.592 | 0.351 | 1.23E-27 | 25 | EEF1B2  | Immune-NK cells |
| 7.20E-68  | 0.41757694 | 0.288 | 0.075 | 2.43E-63 | 25 | SLC22A2 | Immune-NK cells |
| 1.97E-37  | 0.41752312 | 0.862 | 0.712 | 6.64E-33 | 25 | RPL37   | Immune-NK cells |
| 1.38E-67  | 0.41480734 | 0.974 | 0.876 | 4.66E-63 | 25 | RPS27A  | Immune-NK cells |
| 2.09E-36  | 0.41320936 | 0.404 | 0.181 | 7.06E-32 | 25 | STAT1   | Immune-NK cells |
| 6.60E-41  | 0.41217638 | 0.872 | 0.725 | 2.22E-36 | 25 | RPL8    | Immune-NK cells |
| 7.25E-38  | 0.41063813 | 0.826 | 0.629 | 2.44E-33 | 25 | RPS7    | Immune-NK cells |
| 1.29E-38  | 0.41043366 | 0.87  | 0.69  | 4.34E-34 | 25 | CALM2   | Immune-NK cells |
| 5.27E-48  | 0.40974717 | 0.359 | 0.132 | 1.77E-43 | 25 | CARHSP1 | Immune-NK cells |
| 4.05E-44  | 0.40948972 | 0.903 | 0.771 | 1.37E-39 | 25 | RPS24   | Immune-NK cells |
| 1.70E-47  | 0.40924152 | 0.306 | 0.101 | 5.74E-43 | 25 | MAF     | Immune-NK cells |
| 1.20E-83  | 0.40906684 | 0.266 | 0.057 | 4.03E-79 | 25 | PDLIM4  | Immune-NK cells |
| 1.47E-29  | 0.40844703 | 0.653 | 0.426 | 4.95E-25 | 25 | CCNI    | Immune-NK cells |
| 2.24E-43  | 0.40798624 | 0.89  | 0.695 | 7.53E-39 | 25 | RPL38   | Immune-NK cells |
| 5.32E-40  | 0.40748109 | 0.365 | 0.154 | 1.79E-35 | 25 | EEF1E1  | Immune-NK cells |
| 2.20E-28  | 0.40648138 | 0.718 | 0.48  | 7.43E-24 | 25 | PFN1    | Immune-NK cells |
| 5.94E-108 | 0.40614513 | 0.256 | 0.045 | #####    | 25 | PHLDA3  | Immune-NK cells |
| 1.20E-25  | 0.4050627  | 0.625 | 0.389 | 4.04E-21 | 25 | HMGN2   | Immune-NK cells |
| 7.79E-34  | 0.40313913 | 0.834 | 0.598 | 2.62E-29 | 25 | RPL27   | Immune-NK cells |
| 1.62E-34  | 0.40301681 | 0.647 | 0.366 | 5.44E-30 | 25 | CYBA    | Immune-NK cells |
| 6.79E-72  | 0.40132296 | 0.312 | 0.083 | 2.29E-67 | 25 | TMEM98  | Immune-NK cells |
| 8.37E-71  | 0.3988837  | 0.325 | 0.088 | 2.82E-66 | 25 | FHL1    | Immune-NK cells |
| 9.23E-69  | 0.39884879 | 0.276 | 0.07  | 3.11E-64 | 25 | TCEAL2  | Immune-NK cells |
| 1.21E-36  | 0.39876486 | 0.436 | 0.204 | 4.09E-32 | 25 | ITGAV   | Immune-NK cells |
| 1.18E-27  | 0.39820606 | 0.673 | 0.438 | 3.99E-23 | 25 | NPM1    | Immune-NK cells |
| 7.79E-30  | 0.39778078 | 0.389 | 0.183 | 2.63E-25 | 25 | CYR61   | Immune-NK cells |
| 1.39E-37  | 0.39572604 | 0.834 | 0.63  | 4.68E-33 | 25 | RPS11   | Immune-NK cells |
| 3.19E-37  | 0.39521681 | 0.487 | 0.237 | 1.08E-32 | 25 | RSL24D1 | Immune-NK cells |
| 1.45E-37  | 0.39515696 | 0.497 | 0.243 | 4.87E-33 | 25 | TMEM205 | Immune-NK cells |
| 4.04E-35  | 0.3950891  | 0.852 | 0.647 | 1.36E-30 | 25 | RPL22   | Immune-NK cells |
| 2.57E-34  | 0.39480835 | 0.606 | 0.339 | 8.65E-30 | 25 | CUTA    | Immune-NK cells |
| 1.99E-45  | 0.39279687 | 0.943 | 0.823 | 6.72E-41 | 25 | RPL35   | Immune-NK cells |
| 5.93E-31  | 0.39276805 | 0.696 | 0.443 | 2.00E-26 | 25 | RPL36AL | Immune-NK cells |
| 1.34E-29  | 0.39056586 | 0.363 | 0.169 | 4.52E-25 | 25 | TUBA1A  | Immune-NK cells |
| 1.81E-43  | 0.39018198 | 0.329 | 0.124 | 6.08E-39 | 25 | MRPL14  | Immune-NK cells |
| 8.37E-49  | 0.38960898 | 0.272 | 0.084 | 2.82E-44 | 25 | SBSPON  | Immune-NK cells |
| 3.46E-30  | 0.38867832 | 0.746 | 0.503 | 1.17E-25 | 25 | NACA    | Immune-NK cells |
| 4.51E-38  | 0.38810568 | 0.462 | 0.22  | 1.52E-33 | 25 | BANF1   | Immune-NK cells |
| 1.18E-82  | 0.38655997 | 0.444 | 0.131 | 3.98E-78 | 25 | TM4SF1  | Immune-NK cells |
| 1.85E-44  | 0.38650369 | 0.919 | 0.793 | 6.25E-40 | 25 | RPLP2   | Immune-NK cells |
| 8.93E-36  | 0.38429558 | 0.418 | 0.194 | 3.01E-31 | 25 | PPA1    | Immune-NK cells |

|          |            |       |       |          |    |          |                 |
|----------|------------|-------|-------|----------|----|----------|-----------------|
| 2.09E-39 | 0.38389389 | 0.915 | 0.767 | 7.03E-35 | 25 | RPL28    | Immune-NK cells |
| 1.31E-30 | 0.38367861 | 0.288 | 0.12  | 4.40E-26 | 25 | LTBP3    | Immune-NK cells |
| 6.47E-64 | 0.3828619  | 0.992 | 0.946 | 2.18E-59 | 25 | RPL41    | Immune-NK cells |
| 4.41E-58 | 0.38223072 | 0.27  | 0.075 | 1.49E-53 | 25 | PLXDC2   | Immune-NK cells |
| 1.46E-52 | 0.38129563 | 0.412 | 0.15  | 4.93E-48 | 25 | CLIC4    | Immune-NK cells |
| 1.86E-57 | 0.38003347 | 0.298 | 0.089 | 6.28E-53 | 25 | ACLY     | Immune-NK cells |
| 5.80E-37 | 0.37950723 | 0.892 | 0.722 | 1.95E-32 | 25 | FAU      | Immune-NK cells |
| 4.84E-28 | 0.37792846 | 0.477 | 0.26  | 1.63E-23 | 25 | TSPO     | Immune-NK cells |
| 3.91E-32 | 0.37718896 | 0.416 | 0.197 | 1.32E-27 | 25 | C11orf54 | Immune-NK cells |
| 2.64E-27 | 0.3771217  | 0.442 | 0.232 | 8.89E-23 | 25 | STMN1    | Immune-NK cells |
| 2.06E-25 | 0.3770527  | 0.535 | 0.313 | 6.94E-21 | 25 | TRAM1    | Immune-NK cells |
| 2.94E-33 | 0.37702683 | 0.651 | 0.381 | 9.89E-29 | 25 | NAP1L1   | Immune-NK cells |
| 1.77E-30 | 0.37517012 | 0.649 | 0.389 | 5.98E-26 | 25 | NEDD8    | Immune-NK cells |
| 7.61E-28 | 0.37355874 | 0.515 | 0.287 | 2.56E-23 | 25 | AHNAK    | Immune-NK cells |
| 1.30E-31 | 0.37239407 | 0.582 | 0.319 | 4.36E-27 | 25 | RPL17    | Immune-NK cells |
| 2.07E-74 | 0.37228451 | 0.254 | 0.058 | 6.97E-70 | 25 | PEMT     | Immune-NK cells |
| 2.63E-32 | 0.37204621 | 0.308 | 0.129 | 8.86E-28 | 25 | VPS25    | Immune-NK cells |
| 3.21E-41 | 0.37147896 | 0.357 | 0.142 | 1.08E-36 | 25 | TNS1     | Immune-NK cells |
| 1.06E-27 | 0.37084707 | 0.826 | 0.623 | 3.57E-23 | 25 | RPS21    | Immune-NK cells |
| 2.28E-60 | 0.37040213 | 0.268 | 0.072 | 7.68E-56 | 25 | ITGA1    | Immune-NK cells |
| 8.43E-29 | 0.37016462 | 0.708 | 0.463 | 2.84E-24 | 25 | WBP5     | Immune-NK cells |
| 9.11E-49 | 0.36826969 | 0.953 | 0.851 | 3.07E-44 | 25 | RPS15    | Immune-NK cells |
| 5.86E-19 | 0.36787936 | 0.254 | 0.119 | 1.97E-14 | 25 | NNMT     | Immune-NK cells |
| 1.39E-24 | 0.36773913 | 0.807 | 0.644 | 4.70E-20 | 25 | ACTG1    | Immune-NK cells |
| 3.22E-32 | 0.3675403  | 0.546 | 0.299 | 1.09E-27 | 25 | MZT2B    | Immune-NK cells |
| 8.49E-27 | 0.36677092 | 0.777 | 0.543 | 2.86E-22 | 25 | CD63     | Immune-NK cells |
| 5.11E-33 | 0.36494242 | 0.469 | 0.235 | 1.72E-28 | 25 | SSR2     | Immune-NK cells |
| 1.40E-55 | 0.36490893 | 0.264 | 0.075 | 4.71E-51 | 25 | SYNGR1   | Immune-NK cells |
| 3.52E-28 | 0.36445042 | 0.546 | 0.309 | 1.18E-23 | 25 | SELM     | Immune-NK cells |
| 4.78E-29 | 0.36379006 | 0.456 | 0.238 | 1.61E-24 | 25 | C6orf48  | Immune-NK cells |
| 4.08E-30 | 0.36368087 | 0.819 | 0.638 | 1.38E-25 | 25 | UBA52    | Immune-NK cells |
| 6.81E-40 | 0.36316889 | 0.367 | 0.146 | 2.29E-35 | 25 | TFPI     | Immune-NK cells |
| 2.05E-45 | 0.362866   | 0.325 | 0.116 | 6.91E-41 | 25 | SLC40A1  | Immune-NK cells |
| 1.74E-47 | 0.36243994 | 0.974 | 0.902 | 5.86E-43 | 25 | PTMA     | Immune-NK cells |
| 3.73E-32 | 0.36071878 | 0.523 | 0.271 | 1.26E-27 | 25 | CETN2    | Immune-NK cells |
| 4.30E-78 | 0.35893846 | 0.252 | 0.055 | 1.45E-73 | 25 | PDGFC    | Immune-NK cells |
| 8.90E-24 | 0.35869997 | 0.515 | 0.3   | 3.00E-19 | 25 | ID2      | Immune-NK cells |
| 2.00E-30 | 0.35684334 | 0.659 | 0.391 | 6.73E-26 | 25 | RPS10    | Immune-NK cells |
| 1.56E-34 | 0.35615304 | 0.473 | 0.232 | 5.27E-30 | 25 | MRFAP1   | Immune-NK cells |
| 6.13E-33 | 0.35574988 | 0.88  | 0.717 | 2.06E-28 | 25 | RPL9     | Immune-NK cells |
| 1.52E-40 | 0.35522824 | 0.921 | 0.843 | 5.12E-36 | 25 | RPS14    | Immune-NK cells |
| 3.98E-23 | 0.35331042 | 0.897 | 0.803 | 1.34E-18 | 25 | FTH1     | Immune-NK cells |
| 3.02E-45 | 0.34909898 | 0.308 | 0.108 | 1.02E-40 | 25 | SYTL2    | Immune-NK cells |
| 3.58E-30 | 0.34827674 | 0.412 | 0.202 | 1.21E-25 | 25 | ARL2     | Immune-NK cells |
| 9.15E-76 | 0.34762587 | 0.254 | 0.057 | 3.08E-71 | 25 | HSPB8    | Immune-NK cells |
| 1.62E-23 | 0.34726454 | 0.629 | 0.396 | 5.46E-19 | 25 | NPC2     | Immune-NK cells |
| 5.22E-43 | 0.34682522 | 0.933 | 0.852 | 1.76E-38 | 25 | RPL37A   | Immune-NK cells |
| 4.54E-35 | 0.34627194 | 0.41  | 0.188 | 1.53E-30 | 25 | EIF3G    | Immune-NK cells |

|          |            |       |       |          |    |          |                 |
|----------|------------|-------|-------|----------|----|----------|-----------------|
| 3.22E-23 | 0.34603737 | 0.673 | 0.443 | 1.08E-18 | 25 | GPX4     | Immune-NK cells |
| 8.89E-31 | 0.34481821 | 0.367 | 0.167 | 3.00E-26 | 25 | FBXO21   | Immune-NK cells |
| 1.80E-29 | 0.34459959 | 0.777 | 0.498 | 6.07E-25 | 25 | RPL36A   | Immune-NK cells |
| 4.69E-31 | 0.34399284 | 0.41  | 0.195 | 1.58E-26 | 25 | IFI27L2  | Immune-NK cells |
| 3.92E-36 | 0.34392602 | 0.927 | 0.79  | 1.32E-31 | 25 | RPL23A   | Immune-NK cells |
| 1.73E-37 | 0.33770759 | 0.304 | 0.117 | 5.83E-33 | 25 | C9orf3   | Immune-NK cells |
| 2.75E-24 | 0.33745337 | 0.69  | 0.443 | 9.28E-20 | 25 | EDF1     | Immune-NK cells |
| 2.88E-24 | 0.33600044 | 0.779 | 0.573 | 9.72E-20 | 25 | GSTP1    | Immune-NK cells |
| 1.76E-25 | 0.33503197 | 0.801 | 0.565 | 5.92E-21 | 25 | MORF4L1  | Immune-NK cells |
| 2.94E-29 | 0.33493076 | 0.866 | 0.682 | 9.92E-25 | 25 | RPS20    | Immune-NK cells |
| 1.24E-26 | 0.33482682 | 0.477 | 0.261 | 4.17E-22 | 25 | KRT10    | Immune-NK cells |
| 1.15E-26 | 0.33364408 | 0.485 | 0.265 | 3.87E-22 | 25 | PPIB     | Immune-NK cells |
| 5.11E-13 | 0.33323977 | 0.744 | 0.564 | 1.72E-08 | 25 | DUSP1    | Immune-NK cells |
| 4.42E-32 | 0.33153341 | 0.89  | 0.712 | 1.49E-27 | 25 | RPS13    | Immune-NK cells |
| 8.57E-29 | 0.32946665 | 0.353 | 0.165 | 2.89E-24 | 25 | MZT2A    | Immune-NK cells |
| 5.31E-35 | 0.32942669 | 0.876 | 0.644 | 1.79E-30 | 25 | DSTN     | Immune-NK cells |
| 5.15E-26 | 0.32862991 | 0.54  | 0.314 | 1.73E-21 | 25 | PARK7    | Immune-NK cells |
| 5.51E-33 | 0.32833391 | 0.268 | 0.101 | 1.86E-28 | 25 | RAPGEF3  | Immune-NK cells |
| 2.42E-23 | 0.32670573 | 0.57  | 0.343 | 8.15E-19 | 25 | PSME1    | Immune-NK cells |
| 1.06E-19 | 0.32654869 | 0.773 | 0.554 | 3.57E-15 | 25 | POLR2L   | Immune-NK cells |
| 1.30E-31 | 0.32606883 | 0.396 | 0.187 | 4.40E-27 | 25 | ALKBH7   | Immune-NK cells |
| 5.30E-38 | 0.32555648 | 0.373 | 0.155 | 1.79E-33 | 25 | TLN1     | Immune-NK cells |
| 2.13E-35 | 0.32306288 | 0.27  | 0.1   | 7.18E-31 | 25 | TSPAN4   | Immune-NK cells |
| 6.45E-46 | 0.32206709 | 0.986 | 0.943 | 2.17E-41 | 25 | RPS27    | Immune-NK cells |
| 1.90E-23 | 0.31991235 | 0.781 | 0.564 | 6.42E-19 | 25 | HINT1    | Immune-NK cells |
| 1.63E-41 | 0.31864046 | 0.278 | 0.096 | 5.50E-37 | 25 | ZYX      | Immune-NK cells |
| 1.93E-29 | 0.31727806 | 0.282 | 0.117 | 6.52E-25 | 25 | PLP2     | Immune-NK cells |
| 5.70E-24 | 0.31559709 | 0.501 | 0.285 | 1.92E-19 | 25 | POLR2I   | Immune-NK cells |
| 7.88E-34 | 0.31490921 | 0.327 | 0.134 | 2.65E-29 | 25 | PRKCI    | Immune-NK cells |
| 4.56E-25 | 0.31476081 | 0.402 | 0.209 | 1.54E-20 | 25 | LSM7     | Immune-NK cells |
| 8.86E-31 | 0.31470588 | 0.318 | 0.136 | 2.98E-26 | 25 | SLC25A37 | Immune-NK cells |
| 1.01E-34 | 0.31391989 | 0.254 | 0.091 | 3.39E-30 | 25 | AMOTL2   | Immune-NK cells |
| 1.28E-18 | 0.31377346 | 0.742 | 0.537 | 4.32E-14 | 25 | RPS27L   | Immune-NK cells |
| 9.98E-37 | 0.31302744 | 0.949 | 0.922 | 3.36E-32 | 25 | EEF1A1   | Immune-NK cells |
| 6.64E-27 | 0.31281348 | 0.481 | 0.261 | 2.24E-22 | 25 | TMEM123  | Immune-NK cells |
| 5.00E-38 | 0.31188724 | 0.323 | 0.125 | 1.69E-33 | 25 | PON2     | Immune-NK cells |
| 1.80E-26 | 0.3102891  | 0.499 | 0.277 | 6.05E-22 | 25 | TCEAL8   | Immune-NK cells |
| 1.75E-34 | 0.31016478 | 0.312 | 0.125 | 5.88E-30 | 25 | LIMS1    | Immune-NK cells |
| 1.08E-29 | 0.30911246 | 0.46  | 0.231 | 3.63E-25 | 25 | DAB2     | Immune-NK cells |
| 1.87E-25 | 0.30909303 | 0.412 | 0.212 | 6.31E-21 | 25 | MYH9     | Immune-NK cells |
| 5.51E-25 | 0.30871462 | 0.329 | 0.155 | 1.86E-20 | 25 | RASSF7   | Immune-NK cells |
| 1.84E-35 | 0.30728399 | 0.284 | 0.106 | 6.18E-31 | 25 | PIK3R1   | Immune-NK cells |
| 8.78E-50 | 0.30711997 | 0.26  | 0.074 | 2.96E-45 | 25 | LRP2     | Immune-NK cells |
| 1.56E-45 | 0.307051   | 0.385 | 0.146 | 5.26E-41 | 25 | BST2     | Immune-NK cells |
| 2.41E-24 | 0.30232367 | 0.623 | 0.381 | 8.13E-20 | 25 | ITGB1    | Immune-NK cells |
| 1.12E-34 | 0.30132721 | 0.302 | 0.121 | 3.76E-30 | 25 | ILK      | Immune-NK cells |
| 5.25E-30 | 0.3012014  | 0.941 | 0.849 | 1.77E-25 | 25 | RPL36    | Immune-NK cells |
| 1.37E-26 | 0.30080374 | 0.349 | 0.166 | 4.62E-22 | 25 | TBCB     | Immune-NK cells |

|          |            |       |       |          |    |         |                 |
|----------|------------|-------|-------|----------|----|---------|-----------------|
| 2.19E-31 | 0.30065913 | 0.412 | 0.196 | 7.38E-27 | 25 | UBXN1   | Immune-NK cells |
| 4.28E-36 | 0.30046639 | 0.268 | 0.096 | 1.44E-31 | 25 | CAV2    | Immune-NK cells |
| 3.94E-24 | 0.29999753 | 0.391 | 0.205 | 1.33E-19 | 25 | ERGIC3  | Immune-NK cells |
| 2.83E-37 | 0.29885583 | 0.412 | 0.177 | 9.54E-33 | 25 | MARCKS  | Immune-NK cells |
| 1.83E-31 | 0.29697952 | 0.325 | 0.139 | 6.18E-27 | 25 | APEX1   | Immune-NK cells |
| 6.20E-16 | 0.29510432 | 0.728 | 0.542 | 2.09E-11 | 25 | ZFP36L1 | Immune-NK cells |
| 1.57E-20 | 0.29475275 | 0.763 | 0.552 | 5.30E-16 | 25 | ATP5G2  | Immune-NK cells |
| 1.06E-25 | 0.29395901 | 0.57  | 0.33  | 3.56E-21 | 25 | EIF3E   | Immune-NK cells |
| 7.17E-19 | 0.2936712  | 0.722 | 0.504 | 2.41E-14 | 25 | ATPIF1  | Immune-NK cells |
| 7.49E-28 | 0.29333238 | 0.341 | 0.157 | 2.52E-23 | 25 | FAM3C   | Immune-NK cells |
| 3.17E-26 | 0.29324909 | 0.274 | 0.119 | 1.07E-21 | 25 | TAX1BP3 | Immune-NK cells |
| 2.06E-21 | 0.29233116 | 0.523 | 0.308 | 6.93E-17 | 25 | DAD1    | Immune-NK cells |
| 2.03E-19 | 0.29202713 | 0.765 | 0.565 | 6.85E-15 | 25 | CIRBP   | Immune-NK cells |
| 9.79E-32 | 0.29187707 | 0.28  | 0.111 | 3.30E-27 | 25 | TUSC3   | Immune-NK cells |
| 1.46E-18 | 0.29114255 | 0.722 | 0.521 | 4.92E-14 | 25 | S100A10 | Immune-NK cells |
| 9.96E-29 | 0.29032536 | 0.404 | 0.197 | 3.36E-24 | 25 | EIF3L   | Immune-NK cells |
| 3.53E-24 | 0.28897632 | 0.412 | 0.215 | 1.19E-19 | 25 | MACF1   | Immune-NK cells |
| 5.54E-21 | 0.28846862 | 0.495 | 0.29  | 1.87E-16 | 25 | RABAC1  | Immune-NK cells |
| 1.08E-28 | 0.28829368 | 0.389 | 0.187 | 3.64E-24 | 25 | AP2M1   | Immune-NK cells |
| 2.29E-35 | 0.28703336 | 0.27  | 0.098 | 7.71E-31 | 25 | GULP1   | Immune-NK cells |
| 5.68E-23 | 0.28697656 | 0.428 | 0.232 | 1.91E-18 | 25 | CFDP1   | Immune-NK cells |
| 6.25E-30 | 0.28685501 | 0.357 | 0.162 | 2.11E-25 | 25 | AGRN    | Immune-NK cells |
| 1.20E-33 | 0.28667286 | 0.406 | 0.185 | 4.06E-29 | 25 | VKORC1  | Immune-NK cells |
| 8.20E-22 | 0.28568293 | 0.394 | 0.214 | 2.76E-17 | 25 | EIF3F   | Immune-NK cells |
| 1.05E-23 | 0.28519396 | 0.406 | 0.212 | 3.53E-19 | 25 | PAX8    | Immune-NK cells |
| 4.55E-22 | 0.28511031 | 0.471 | 0.268 | 1.53E-17 | 25 | PSMB1   | Immune-NK cells |
| 1.40E-23 | 0.2844968  | 0.505 | 0.285 | 4.71E-19 | 25 | RAB2A   | Immune-NK cells |
| 3.06E-20 | 0.28415927 | 0.568 | 0.351 | 1.03E-15 | 25 | SNRPD2  | Immune-NK cells |
| 6.26E-25 | 0.28372855 | 0.467 | 0.255 | 2.11E-20 | 25 | SF3B5   | Immune-NK cells |
| 3.91E-23 | 0.28313073 | 0.298 | 0.14  | 1.32E-18 | 25 | ARL3    | Immune-NK cells |
| 1.04E-32 | 0.28300473 | 0.367 | 0.16  | 3.51E-28 | 25 | TGIF1   | Immune-NK cells |
| 1.41E-29 | 0.28240753 | 0.357 | 0.163 | 4.74E-25 | 25 | TMEM14A | Immune-NK cells |
| 8.77E-24 | 0.28232818 | 0.387 | 0.202 | 2.96E-19 | 25 | TMED9   | Immune-NK cells |
| 2.99E-24 | 0.28190483 | 0.282 | 0.127 | 1.01E-19 | 25 | BAX     | Immune-NK cells |
| 1.76E-46 | 0.28081897 | 0.274 | 0.086 | 5.93E-42 | 25 | FOXC1   | Immune-NK cells |
| 1.67E-45 | 0.28041015 | 0.256 | 0.079 | 5.62E-41 | 25 | NBL1    | Immune-NK cells |
| 1.43E-16 | 0.28021616 | 0.669 | 0.468 | 4.81E-12 | 25 | CFL1    | Immune-NK cells |
| 2.04E-19 | 0.27952668 | 0.406 | 0.229 | 6.88E-15 | 25 | PGRMC1  | Immune-NK cells |
| 2.73E-25 | 0.27915106 | 0.353 | 0.172 | 9.21E-21 | 25 | SNRPB   | Immune-NK cells |
| 5.40E-20 | 0.27889269 | 0.426 | 0.241 | 1.82E-15 | 25 | ESD     | Immune-NK cells |
| 3.17E-34 | 0.27863846 | 0.314 | 0.128 | 1.07E-29 | 25 | RAB34   | Immune-NK cells |
| 4.49E-33 | 0.27859875 | 0.286 | 0.112 | 1.51E-28 | 25 | PLOD2   | Immune-NK cells |
| 2.61E-22 | 0.27856427 | 0.509 | 0.291 | 8.80E-18 | 25 | GTF2I   | Immune-NK cells |
| 7.95E-29 | 0.27644657 | 0.361 | 0.168 | 2.68E-24 | 25 | ZBTB44  | Immune-NK cells |
| 1.17E-24 | 0.27630567 | 0.318 | 0.15  | 3.94E-20 | 25 | SAT2    | Immune-NK cells |
| 9.94E-45 | 0.2755881  | 0.252 | 0.077 | 3.35E-40 | 25 | MAOB    | Immune-NK cells |
| 1.95E-24 | 0.27516222 | 0.465 | 0.252 | 6.58E-20 | 25 | RBM3    | Immune-NK cells |
| 6.10E-21 | 0.27443698 | 0.414 | 0.229 | 2.06E-16 | 25 | DEK     | Immune-NK cells |

|          |            |       |       |          |    |          |                 |
|----------|------------|-------|-------|----------|----|----------|-----------------|
| 2.83E-18 | 0.27428263 | 0.467 | 0.28  | 9.53E-14 | 25 | SF3B6    | Immune-NK cells |
| 1.65E-15 | 0.2735866  | 0.769 | 0.563 | 5.56E-11 | 25 | S100A11  | Immune-NK cells |
| 3.28E-37 | 0.27254737 | 0.448 | 0.197 | 1.10E-32 | 25 | TPM4     | Immune-NK cells |
| 4.56E-18 | 0.27036019 | 0.465 | 0.277 | 1.54E-13 | 25 | ANAPC11  | Immune-NK cells |
| 3.38E-24 | 0.26991029 | 0.27  | 0.119 | 1.14E-19 | 25 | GTF2F1   | Immune-NK cells |
| 2.67E-28 | 0.26935229 | 0.266 | 0.107 | 8.99E-24 | 25 | RNF144B  | Immune-NK cells |
| 9.64E-22 | 0.26931275 | 0.801 | 0.591 | 3.25E-17 | 25 | RPL30    | Immune-NK cells |
| 1.47E-19 | 0.26905869 | 0.688 | 0.466 | 4.95E-15 | 25 | SUMO2    | Immune-NK cells |
| 2.01E-16 | 0.26860714 | 0.308 | 0.162 | 6.76E-12 | 25 | SLPI     | Immune-NK cells |
| 2.48E-37 | 0.26806919 | 0.284 | 0.102 | 8.36E-33 | 25 | LBH      | Immune-NK cells |
| 5.15E-24 | 0.26789287 | 0.381 | 0.194 | 1.74E-19 | 25 | DNPH1    | Immune-NK cells |
| 1.58E-33 | 0.26759246 | 0.284 | 0.11  | 5.31E-29 | 25 | CUEDC2   | Immune-NK cells |
| 2.15E-23 | 0.26735156 | 0.59  | 0.349 | 7.23E-19 | 25 | TCEAL4   | Immune-NK cells |
| 1.67E-14 | 0.26667334 | 0.895 | 0.808 | 5.61E-10 | 25 | ACTB     | Immune-NK cells |
| 4.21E-24 | 0.26638921 | 0.385 | 0.195 | 1.42E-19 | 25 | CWC15    | Immune-NK cells |
| 1.02E-26 | 0.26587642 | 0.473 | 0.248 | 3.44E-22 | 25 | IL6ST    | Immune-NK cells |
| 2.18E-28 | 0.26565414 | 0.298 | 0.129 | 7.33E-24 | 25 | EIF3D    | Immune-NK cells |
| 2.37E-22 | 0.2647466  | 0.312 | 0.151 | 7.98E-18 | 25 | C1orf122 | Immune-NK cells |
| 3.08E-10 | 0.26456487 | 0.331 | 0.209 | 1.04E-05 | 25 | INC01320 | Immune-NK cells |
| 6.86E-20 | 0.26427856 | 0.503 | 0.3   | 2.31E-15 | 25 | SNRPE    | Immune-NK cells |
| 6.13E-29 | 0.26379701 | 0.276 | 0.114 | 2.07E-24 | 25 | RCN1     | Immune-NK cells |
| 1.23E-22 | 0.26354372 | 0.434 | 0.237 | 4.14E-18 | 25 | BEX4     | Immune-NK cells |
| 2.81E-29 | 0.26315022 | 0.254 | 0.098 | 9.46E-25 | 25 | OPTN     | Immune-NK cells |
| 6.38E-26 | 0.26289544 | 0.418 | 0.21  | 2.15E-21 | 25 | ACTR3    | Immune-NK cells |
| 5.06E-22 | 0.26253496 | 0.377 | 0.198 | 1.70E-17 | 25 | OSTC     | Immune-NK cells |
| 4.14E-19 | 0.26209801 | 0.369 | 0.2   | 1.40E-14 | 25 | TBL1XR1  | Immune-NK cells |
| 3.09E-23 | 0.26185032 | 0.487 | 0.269 | 1.04E-18 | 25 | GLTSCR2  | Immune-NK cells |
| 1.23E-32 | 0.26156358 | 0.294 | 0.117 | 4.14E-28 | 25 | ATP13A3  | Immune-NK cells |
| 1.05E-22 | 0.26080589 | 0.254 | 0.112 | 3.54E-18 | 25 | YPEL2    | Immune-NK cells |
| 3.05E-25 | 0.26056395 | 0.369 | 0.182 | 1.03E-20 | 25 | SARS     | Immune-NK cells |
| 1.02E-19 | 0.25909153 | 0.55  | 0.338 | 3.43E-15 | 25 | MRPS21   | Immune-NK cells |
| 6.16E-21 | 0.25869731 | 0.509 | 0.298 | 2.07E-16 | 25 | BRK1     | Immune-NK cells |
| 2.47E-18 | 0.25854036 | 0.55  | 0.335 | 8.32E-14 | 25 | KRT18    | Immune-NK cells |
| 2.93E-33 | 0.25829438 | 0.278 | 0.104 | 9.87E-29 | 25 | PDZK1    | Immune-NK cells |
| 3.59E-19 | 0.25755733 | 0.363 | 0.196 | 1.21E-14 | 25 | H2AFJ    | Immune-NK cells |
| 5.44E-24 | 0.25704566 | 0.46  | 0.246 | 1.83E-19 | 25 | BEX2     | Immune-NK cells |
| 1.00E-15 | 0.25704273 | 0.592 | 0.396 | 3.38E-11 | 25 | ENO1     | Immune-NK cells |
| 2.32E-19 | 0.25700994 | 0.264 | 0.128 | 7.82E-15 | 25 | MYDGF    | Immune-NK cells |
| 1.03E-16 | 0.25689645 | 0.633 | 0.429 | 3.49E-12 | 25 | HMGN1    | Immune-NK cells |
| 1.96E-24 | 0.25682699 | 0.264 | 0.113 | 6.61E-20 | 25 | NRP1     | Immune-NK cells |
| 9.26E-17 | 0.25612386 | 0.83  | 0.676 | 3.12E-12 | 25 | H3F3A    | Immune-NK cells |
| 4.39E-22 | 0.25525913 | 0.503 | 0.284 | 1.48E-17 | 25 | C090498  | Immune-NK cells |
| 1.00E-22 | 0.25461074 | 0.467 | 0.257 | 3.38E-18 | 25 | MRPL51   | Immune-NK cells |
| 9.30E-23 | 0.25441492 | 0.385 | 0.199 | 3.13E-18 | 25 | PFDN1    | Immune-NK cells |
| 7.25E-19 | 0.25327046 | 0.426 | 0.246 | 2.44E-14 | 25 | TMEM14C  | Immune-NK cells |
| 5.28E-21 | 0.25321549 | 0.481 | 0.275 | 1.78E-16 | 25 | LEPROT   | Immune-NK cells |
| 1.50E-21 | 0.25307376 | 0.505 | 0.292 | 5.06E-17 | 25 | DYNLT1   | Immune-NK cells |
| 2.37E-21 | 0.25261515 | 0.633 | 0.393 | 7.99E-17 | 25 | SOX4     | Immune-NK cells |

|           |            |       |       |          |    |          |                 |
|-----------|------------|-------|-------|----------|----|----------|-----------------|
| 8.19E-22  | 0.2525895  | 0.385 | 0.204 | 2.76E-17 | 25 | CXXC5    | Immune-NK cells |
| 3.52E-22  | 0.25202799 | 0.394 | 0.207 | 1.19E-17 | 25 | PCBD1    | Immune-NK cells |
| 2.28E-15  | 0.25091123 | 0.708 | 0.502 | 7.67E-11 | 25 | NDUFS5   | Immune-NK cells |
| 1.22E-38  | 0.25047097 | 0.284 | 0.101 | 4.10E-34 | 25 | GAS6     | Immune-NK cells |
| 4.26E-28  | 0.25035903 | 0.341 | 0.155 | 1.44E-23 | 25 | CCDC50   | Immune-NK cells |
| 1.06E-135 | 1.54343782 | 0.788 | 0.288 | #####    | 26 | MMP7     | Collecting duct |
| 1.25E-134 | 1.40608109 | 0.48  | 0.116 | #####    | 26 | CCL2     | Collecting duct |
| 6.23E-194 | 1.27152493 | 0.57  | 0.119 | #####    | 26 | CXCL2    | Collecting duct |
| 2.82E-201 | 1.17986345 | 0.381 | 0.053 | #####    | 26 | CXCL1    | Collecting duct |
| 2.49E-157 | 1.17781853 | 0.619 | 0.159 | #####    | 26 | SLPI     | Collecting duct |
| 3.79E-126 | 1.1569186  | 0.836 | 0.391 | #####    | 26 | SOX4     | Collecting duct |
| 1.52E-146 | 1.08227526 | 0.953 | 0.532 | #####    | 26 | KLF6     | Collecting duct |
| 2.54E-137 | 1.06694178 | 0.802 | 0.312 | #####    | 26 | ATF3     | Collecting duct |
| 7.79E-117 | 1.06592129 | 0.633 | 0.21  | #####    | 26 | ANXA1    | Collecting duct |
| 3.32E-202 | 1.06297561 | 0.372 | 0.05  | #####    | 26 | CXCL3    | Collecting duct |
| 3.04E-135 | 1.06083033 | 0.777 | 0.297 | #####    | 26 | TACSTD2  | Collecting duct |
| 2.70E-164 | 1.05771004 | 0.59  | 0.148 | #####    | 26 | WEE1     | Collecting duct |
| 8.93E-104 | 1.01460036 | 0.642 | 0.245 | 3.01E-99 | 26 | CLDN4    | Collecting duct |
| 5.60E-138 | 1.00152808 | 0.964 | 0.523 | #####    | 26 | EGR1     | Collecting duct |
| 1.43E-126 | 0.99915294 | 0.457 | 0.111 | #####    | 26 | RND3     | Collecting duct |
| 6.49E-101 | 0.99901761 | 0.534 | 0.179 | 2.19E-96 | 26 | CLDN3    | Collecting duct |
| 4.44E-135 | 0.99291619 | 0.664 | 0.209 | #####    | 26 | C8orf4   | Collecting duct |
| 7.11E-147 | 0.96374485 | 0.631 | 0.171 | #####    | 26 | ITGB6    | Collecting duct |
| 3.78E-124 | 0.950048   | 0.552 | 0.155 | #####    | 26 | EMP1     | Collecting duct |
| 2.81E-75  | 0.93897821 | 0.39  | 0.12  | 9.48E-71 | 26 | BIRC3    | Collecting duct |
| 2.41E-108 | 0.91164732 | 0.613 | 0.205 | #####    | 26 | KRT7     | Collecting duct |
| 9.57E-68  | 0.90580358 | 0.595 | 0.277 | 3.22E-63 | 26 | LMNA     | Collecting duct |
| 6.72E-59  | 0.89215548 | 0.523 | 0.234 | 2.26E-54 | 26 | ITM2C    | Collecting duct |
| 7.52E-88  | 0.88738806 | 0.462 | 0.141 | 2.53E-83 | 26 | CREB5    | Collecting duct |
| 1.46E-78  | 0.87977277 | 0.435 | 0.131 | 4.92E-74 | 26 | TM4SF1   | Collecting duct |
| 1.26E-99  | 0.87940704 | 0.333 | 0.074 | 4.26E-95 | 26 | HBEGF    | Collecting duct |
| 2.21E-81  | 0.87433686 | 0.793 | 0.414 | 7.45E-77 | 26 | PPP1CB   | Collecting duct |
| 2.74E-105 | 0.8739176  | 0.865 | 0.422 | #####    | 26 | FOSB     | Collecting duct |
| 3.36E-80  | 0.85930662 | 0.673 | 0.309 | 1.13E-75 | 26 | NFKBIA   | Collecting duct |
| 1.40E-109 | 0.82518957 | 0.545 | 0.159 | #####    | 26 | CLDN10   | Collecting duct |
| 3.68E-103 | 0.82338044 | 0.543 | 0.167 | 1.24E-98 | 26 | SOX9     | Collecting duct |
| 6.97E-116 | 0.80559132 | 0.466 | 0.114 | #####    | 26 | TSPAN8   | Collecting duct |
| 1.87E-96  | 0.80212066 | 0.414 | 0.111 | 6.29E-92 | 26 | MYADM    | Collecting duct |
| 2.44E-69  | 0.79724196 | 0.709 | 0.335 | 8.24E-65 | 26 | CTNNB1   | Collecting duct |
| 3.62E-92  | 0.77939685 | 0.851 | 0.435 | 1.22E-87 | 26 | ZFP36    | Collecting duct |
| 2.96E-62  | 0.74964215 | 0.743 | 0.362 | 9.99E-58 | 26 | S100A2   | Collecting duct |
| 6.76E-79  | 0.74571693 | 0.725 | 0.314 | 2.28E-74 | 26 | CXCL14   | Collecting duct |
| 5.01E-93  | 0.73741763 | 0.953 | 0.681 | 1.69E-88 | 26 | SAT1     | Collecting duct |
| 6.26E-74  | 0.73012372 | 0.399 | 0.117 | 2.11E-69 | 26 | NNMT     | Collecting duct |
| 1.72E-59  | 0.71646655 | 0.468 | 0.182 | 5.78E-55 | 26 | CYR61    | Collecting duct |
| 3.28E-65  | 0.71371108 | 0.477 | 0.176 | 1.11E-60 | 26 | D-3252C9 | Collecting duct |
| 4.96E-101 | 0.70445157 | 0.313 | 0.063 | 1.67E-96 | 26 | PLAU     | Collecting duct |
| 1.75E-52  | 0.69186241 | 0.552 | 0.252 | 5.91E-48 | 26 | WTAP     | Collecting duct |

|           |            |       |       |          |    |          |                 |
|-----------|------------|-------|-------|----------|----|----------|-----------------|
| 7.79E-43  | 0.69029971 | 0.604 | 0.322 | 2.62E-38 | 26 | SOD2     | Collecting duct |
| 5.42E-70  | 0.67973442 | 0.331 | 0.092 | 1.83E-65 | 26 | KLF5     | Collecting duct |
| 9.05E-52  | 0.66940325 | 0.477 | 0.192 | 3.05E-47 | 26 | C1orf56  | Collecting duct |
| 1.40E-97  | 0.66939481 | 0.315 | 0.066 | 4.72E-93 | 26 | EGOT     | Collecting duct |
| 2.16E-117 | 0.66341637 | 0.284 | 0.048 | #####    | 26 | FHL2     | Collecting duct |
| 9.67E-88  | 0.66302454 | 0.98  | 0.675 | 3.26E-83 | 26 | FOS      | Collecting duct |
| 1.33E-66  | 0.65381368 | 0.372 | 0.116 | 4.48E-62 | 26 | CNKS3    | Collecting duct |
| 1.73E-52  | 0.65216132 | 0.662 | 0.352 | 5.83E-48 | 26 | MCL1     | Collecting duct |
| 2.75E-47  | 0.65171436 | 0.606 | 0.313 | 9.26E-43 | 26 | ELF3     | Collecting duct |
| 4.09E-52  | 0.6502588  | 0.854 | 0.544 | 1.38E-47 | 26 | HNRNP1   | Collecting duct |
| 3.28E-16  | 0.64663701 | 0.252 | 0.127 | 1.11E-11 | 26 | SERPINA1 | Collecting duct |
| 5.32E-65  | 0.64258502 | 0.928 | 0.586 | 1.79E-60 | 26 | SPP1     | Collecting duct |
| 8.20E-60  | 0.64133421 | 0.845 | 0.508 | 2.76E-55 | 26 | RHOB     | Collecting duct |
| 9.77E-144 | 0.63954543 | 0.259 | 0.034 | #####    | 26 | LAMC2    | Collecting duct |
| 8.44E-42  | 0.63468686 | 0.374 | 0.149 | 2.84E-37 | 26 | ADAMTS1  | Collecting duct |
| 1.63E-57  | 0.63165517 | 0.457 | 0.174 | 5.48E-53 | 26 | KLF4     | Collecting duct |
| 9.48E-81  | 0.6264064  | 0.921 | 0.537 | 3.19E-76 | 26 | WFDC2    | Collecting duct |
| 2.60E-87  | 0.62087935 | 0.367 | 0.094 | 8.78E-83 | 26 | PROM1    | Collecting duct |
| 2.46E-47  | 0.62018402 | 0.477 | 0.207 | 8.29E-43 | 26 | INC01320 | Collecting duct |
| 5.59E-43  | 0.6164111  | 0.437 | 0.193 | 1.88E-38 | 26 | NCOA7    | Collecting duct |
| 6.64E-53  | 0.6044249  | 0.52  | 0.231 | 2.24E-48 | 26 | STMN1    | Collecting duct |
| 8.62E-53  | 0.59916233 | 0.64  | 0.311 | 2.90E-48 | 26 | NFKBIZ   | Collecting duct |
| 1.53E-54  | 0.59867869 | 0.869 | 0.555 | 5.15E-50 | 26 | JUND     | Collecting duct |
| 1.23E-55  | 0.59486817 | 0.743 | 0.4   | 4.15E-51 | 26 | VMP1     | Collecting duct |
| 4.71E-60  | 0.5941461  | 0.887 | 0.563 | 1.59E-55 | 26 | DUSP1    | Collecting duct |
| 1.55E-55  | 0.5802703  | 0.709 | 0.356 | 5.23E-51 | 26 | MUC1     | Collecting duct |
| 1.20E-43  | 0.57073097 | 0.543 | 0.267 | 4.03E-39 | 26 | MIDN     | Collecting duct |
| 1.67E-45  | 0.5706866  | 0.676 | 0.369 | 5.64E-41 | 26 | TPM1     | Collecting duct |
| 5.99E-55  | 0.56848569 | 0.482 | 0.194 | 2.02E-50 | 26 | UGCG     | Collecting duct |
| 2.54E-45  | 0.56798465 | 0.637 | 0.339 | 8.56E-41 | 26 | SDC4     | Collecting duct |
| 4.63E-43  | 0.56529007 | 0.291 | 0.099 | 1.56E-38 | 26 | R4435-2H | Collecting duct |
| 4.76E-45  | 0.56503944 | 0.351 | 0.129 | 1.60E-40 | 26 | RRAD     | Collecting duct |
| 1.79E-44  | 0.5648293  | 0.606 | 0.307 | 6.05E-40 | 26 | TRA2A    | Collecting duct |
| 4.73E-43  | 0.56426008 | 0.734 | 0.43  | 1.59E-38 | 26 | SET      | Collecting duct |
| 2.80E-48  | 0.56208359 | 0.608 | 0.294 | 9.43E-44 | 26 | FOSL2    | Collecting duct |
| 3.45E-64  | 0.56140739 | 0.984 | 0.817 | 1.16E-59 | 26 | S100A6   | Collecting duct |
| 2.20E-39  | 0.56103029 | 0.61  | 0.341 | 7.42E-35 | 26 | EZR      | Collecting duct |
| 7.90E-73  | 0.55667765 | 0.273 | 0.062 | 2.66E-68 | 26 | RAP2B    | Collecting duct |
| 7.92E-42  | 0.55034381 | 0.732 | 0.432 | 2.67E-37 | 26 | IER2     | Collecting duct |
| 9.18E-65  | 0.54875579 | 0.423 | 0.141 | 3.09E-60 | 26 | HSPA2    | Collecting duct |
| 7.13E-88  | 0.54609479 | 0.394 | 0.099 | 2.40E-83 | 26 | CLDN16   | Collecting duct |
| 8.69E-63  | 0.54594938 | 0.34  | 0.101 | 2.93E-58 | 26 | S100A14  | Collecting duct |
| 1.84E-49  | 0.54462316 | 0.473 | 0.196 | 6.20E-45 | 26 | KLF10    | Collecting duct |
| 6.31E-43  | 0.54065411 | 0.482 | 0.213 | 2.13E-38 | 26 | CDC42SE1 | Collecting duct |
| 6.65E-44  | 0.53127898 | 0.318 | 0.111 | 2.24E-39 | 26 | TRIB1    | Collecting duct |
| 1.04E-31  | 0.52264916 | 0.396 | 0.188 | 3.51E-27 | 26 | CD47     | Collecting duct |
| 6.33E-69  | 0.51327673 | 0.27  | 0.064 | 2.13E-64 | 26 | TFPI2    | Collecting duct |
| 3.19E-55  | 0.50884806 | 0.939 | 0.646 | 1.08E-50 | 26 | CD24     | Collecting duct |

|          |            |       |       |          |    |           |                 |
|----------|------------|-------|-------|----------|----|-----------|-----------------|
| 2.66E-34 | 0.50827097 | 0.275 | 0.102 | 8.97E-30 | 26 | PAQR7     | Collecting duct |
| 1.39E-44 | 0.50656485 | 0.899 | 0.6   | 4.68E-40 | 26 | JUN       | Collecting duct |
| 2.74E-41 | 0.50240737 | 0.426 | 0.181 | 9.25E-37 | 26 | ITGB8     | Collecting duct |
| 8.68E-42 | 0.4969001  | 0.818 | 0.541 | 2.92E-37 | 26 | ZFP36L1   | Collecting duct |
| 1.06E-38 | 0.49631636 | 0.813 | 0.521 | 3.59E-34 | 26 | S100A10   | Collecting duct |
| 7.87E-50 | 0.49341074 | 0.293 | 0.089 | 2.65E-45 | 26 | PMAIP1    | Collecting duct |
| 3.92E-33 | 0.49173776 | 0.482 | 0.246 | 1.32E-28 | 26 | ARID5B    | Collecting duct |
| 1.60E-30 | 0.48295777 | 0.444 | 0.223 | 5.39E-26 | 26 | MDM4      | Collecting duct |
| 1.16E-45 | 0.48037445 | 0.252 | 0.075 | 3.93E-41 | 26 | PLK3      | Collecting duct |
| 9.48E-33 | 0.48010745 | 0.43  | 0.206 | 3.19E-28 | 26 | NFRSF12A  | Collecting duct |
| 1.85E-35 | 0.47640783 | 0.482 | 0.239 | 6.22E-31 | 26 | C7orf73   | Collecting duct |
| 2.22E-34 | 0.47427693 | 0.462 | 0.22  | 7.47E-30 | 26 | SOCS3     | Collecting duct |
| 1.18E-38 | 0.47273918 | 0.813 | 0.531 | 3.96E-34 | 26 | APP       | Collecting duct |
| 3.40E-33 | 0.4712786  | 0.41  | 0.188 | 1.15E-28 | 26 | B4GALT1   | Collecting duct |
| 2.60E-60 | 0.46973191 | 0.277 | 0.072 | 8.75E-56 | 26 | IRX2      | Collecting duct |
| 1.34E-45 | 0.46595817 | 0.437 | 0.178 | 4.50E-41 | 26 | TES       | Collecting duct |
| 3.74E-44 | 0.46004595 | 0.356 | 0.133 | 1.26E-39 | 26 | RAB11FIP1 | Collecting duct |
| 5.63E-37 | 0.45460636 | 0.32  | 0.126 | 1.90E-32 | 26 | PON2      | Collecting duct |
| 9.41E-44 | 0.43922831 | 0.921 | 0.655 | 3.17E-39 | 26 | H3F3B     | Collecting duct |
| 3.57E-29 | 0.43847187 | 0.577 | 0.329 | 1.20E-24 | 26 | ANXA2     | Collecting duct |
| 1.46E-25 | 0.43641699 | 0.486 | 0.269 | 4.91E-21 | 26 | KRT8      | Collecting duct |
| 5.51E-46 | 0.43254372 | 0.309 | 0.103 | 1.86E-41 | 26 | OCLN      | Collecting duct |
| 9.77E-32 | 0.43003818 | 0.59  | 0.333 | 3.29E-27 | 26 | CCNL1     | Collecting duct |
| 9.70E-33 | 0.42415939 | 0.761 | 0.48  | 3.27E-28 | 26 | CDC42     | Collecting duct |
| 2.48E-43 | 0.4209206  | 0.302 | 0.102 | 8.34E-39 | 26 | DEPTOR    | Collecting duct |
| 9.10E-32 | 0.42007992 | 0.471 | 0.233 | 3.07E-27 | 26 | AMFR      | Collecting duct |
| 1.15E-39 | 0.41939762 | 0.304 | 0.109 | 3.86E-35 | 26 | MAFF      | Collecting duct |
| 1.01E-31 | 0.41929919 | 0.662 | 0.398 | 3.41E-27 | 26 | CD59      | Collecting duct |
| 3.71E-30 | 0.41891173 | 0.369 | 0.169 | 1.25E-25 | 26 | TUBA1A    | Collecting duct |
| 3.09E-35 | 0.41490208 | 0.306 | 0.116 | 1.04E-30 | 26 | ERBB4     | Collecting duct |
| 2.40E-25 | 0.41188206 | 0.376 | 0.188 | 8.08E-21 | 26 | PERP      | Collecting duct |
| 4.21E-29 | 0.40975346 | 0.858 | 0.643 | 1.42E-24 | 26 | ACTG1     | Collecting duct |
| 6.73E-34 | 0.40949488 | 0.448 | 0.213 | 2.27E-29 | 26 | PLEKHA1   | Collecting duct |
| 1.10E-30 | 0.40942039 | 0.417 | 0.199 | 3.70E-26 | 26 | BICC1     | Collecting duct |
| 5.67E-25 | 0.40707362 | 0.426 | 0.223 | 1.91E-20 | 26 | GADD45A   | Collecting duct |
| 3.68E-32 | 0.40390742 | 0.273 | 0.102 | 1.24E-27 | 26 | KDM6B     | Collecting duct |
| 3.37E-33 | 0.40219298 | 0.363 | 0.157 | 1.14E-28 | 26 | MGLL      | Collecting duct |
| 8.89E-29 | 0.40040179 | 0.5   | 0.265 | 2.99E-24 | 26 | SRSF6     | Collecting duct |
| 1.52E-25 | 0.3991751  | 0.32  | 0.147 | 5.12E-21 | 26 | LGR4      | Collecting duct |
| 8.41E-27 | 0.39786732 | 0.628 | 0.386 | 2.83E-22 | 26 | SRSF3     | Collecting duct |
| 6.10E-27 | 0.39659804 | 0.466 | 0.248 | 2.05E-22 | 26 | TOB1      | Collecting duct |
| 1.44E-27 | 0.39324703 | 0.664 | 0.403 | 4.85E-23 | 26 | TSC22D1   | Collecting duct |
| 1.38E-26 | 0.39279888 | 0.345 | 0.162 | 4.66E-22 | 26 | RAB3IP    | Collecting duct |
| 4.49E-22 | 0.39258522 | 0.405 | 0.221 | 1.51E-17 | 26 | CITED2    | Collecting duct |
| 1.25E-27 | 0.39054129 | 0.444 | 0.226 | 4.22E-23 | 26 | EFHD1     | Collecting duct |
| 7.38E-26 | 0.38993807 | 0.475 | 0.261 | 2.49E-21 | 26 | ARHGAP29  | Collecting duct |
| 1.12E-90 | 0.38655596 | 0.673 | 0.222 | 3.76E-86 | 26 | SLC12A1   | Collecting duct |
| 2.21E-37 | 0.38250834 | 0.921 | 0.6   | 7.46E-33 | 26 | FXD2      | Collecting duct |

|          |            |       |       |          |    |          |                 |
|----------|------------|-------|-------|----------|----|----------|-----------------|
| 7.96E-28 | 0.38242459 | 0.351 | 0.16  | 2.68E-23 | 26 | TGIF1    | Collecting duct |
| 8.73E-26 | 0.37947823 | 0.374 | 0.184 | 2.94E-21 | 26 | PLSCR1   | Collecting duct |
| 1.80E-48 | 0.3780492  | 0.995 | 0.902 | 6.07E-44 | 26 | PTMA     | Collecting duct |
| 5.95E-26 | 0.37456411 | 0.338 | 0.158 | 2.00E-21 | 26 | NEDD9    | Collecting duct |
| 3.21E-27 | 0.37149347 | 0.266 | 0.107 | 1.08E-22 | 26 | RNF144B  | Collecting duct |
| 8.86E-21 | 0.37096842 | 0.387 | 0.206 | 2.99E-16 | 26 | IRF2BPL  | Collecting duct |
| 1.43E-24 | 0.36972735 | 0.577 | 0.335 | 4.82E-20 | 26 | KRT18    | Collecting duct |
| 8.89E-27 | 0.36880042 | 0.874 | 0.672 | 2.99E-22 | 26 | EIF1     | Collecting duct |
| 1.72E-39 | 0.36733175 | 0.275 | 0.092 | 5.81E-35 | 26 | PPP1R1A  | Collecting duct |
| 7.10E-20 | 0.3645308  | 0.378 | 0.207 | 2.39E-15 | 26 | EIF5A    | Collecting duct |
| 2.47E-26 | 0.36399146 | 0.572 | 0.323 | 8.31E-22 | 26 | ARF6     | Collecting duct |
| 2.40E-25 | 0.3608246  | 0.944 | 0.742 | 8.08E-21 | 26 | ATP1B1   | Collecting duct |
| 5.09E-24 | 0.36036504 | 0.291 | 0.13  | 1.72E-19 | 26 | MFHAS1   | Collecting duct |
| 8.09E-30 | 0.35995278 | 0.383 | 0.172 | 2.73E-25 | 26 | PTH1R    | Collecting duct |
| 2.00E-26 | 0.35706181 | 0.441 | 0.224 | 6.75E-22 | 26 | BHLHE40  | Collecting duct |
| 3.51E-28 | 0.35491036 | 0.381 | 0.179 | 1.18E-23 | 26 | CDKN1A   | Collecting duct |
| 7.39E-23 | 0.35249456 | 0.349 | 0.175 | 2.49E-18 | 26 | CTTN     | Collecting duct |
| 1.56E-20 | 0.3491467  | 0.318 | 0.159 | 5.25E-16 | 26 | PARD6B   | Collecting duct |
| 7.23E-30 | 0.34468805 | 0.309 | 0.122 | 2.44E-25 | 26 | SFRP1    | Collecting duct |
| 1.16E-21 | 0.34402415 | 0.288 | 0.134 | 3.91E-17 | 26 | TJP2     | Collecting duct |
| 3.48E-26 | 0.34341117 | 0.261 | 0.106 | 1.17E-21 | 26 | ACTN1    | Collecting duct |
| 1.33E-24 | 0.34282438 | 0.723 | 0.462 | 4.49E-20 | 26 | JUNB     | Collecting duct |
| 3.56E-20 | 0.34227489 | 0.809 | 0.595 | 1.20E-15 | 26 | PPDPF    | Collecting duct |
| 1.96E-23 | 0.34111453 | 0.529 | 0.311 | 6.62E-19 | 26 | YWHAH    | Collecting duct |
| 1.31E-33 | 0.33988765 | 0.545 | 0.272 | 4.42E-29 | 26 | PIGR     | Collecting duct |
| 6.35E-21 | 0.3386474  | 0.552 | 0.344 | 2.14E-16 | 26 | YBX3     | Collecting duct |
| 4.32E-34 | 0.33431685 | 0.252 | 0.087 | 1.46E-29 | 26 | PRKX     | Collecting duct |
| 1.80E-12 | 0.33300989 | 0.277 | 0.157 | 6.07E-08 | 26 | IRF1     | Collecting duct |
| 1.56E-20 | 0.33256938 | 0.572 | 0.354 | 5.24E-16 | 26 | LDHA     | Collecting duct |
| 5.41E-19 | 0.33041014 | 0.448 | 0.263 | 1.82E-14 | 26 | ARF4     | Collecting duct |
| 9.38E-23 | 0.32808965 | 0.322 | 0.154 | 3.16E-18 | 26 | SUMF2    | Collecting duct |
| 1.08E-21 | 0.32638525 | 0.518 | 0.305 | 3.63E-17 | 26 | BCAM     | Collecting duct |
| 1.21E-73 | 0.32619891 | 0.617 | 0.223 | 4.07E-69 | 26 | UMOD     | Collecting duct |
| 1.25E-22 | 0.32372567 | 0.748 | 0.501 | 4.21E-18 | 26 | YBX1     | Collecting duct |
| 1.22E-20 | 0.32347075 | 0.363 | 0.188 | 4.11E-16 | 26 | UMPD3-A  | Collecting duct |
| 1.58E-19 | 0.31901845 | 0.286 | 0.138 | 5.33E-15 | 26 | VCL      | Collecting duct |
| 3.21E-16 | 0.31854277 | 0.631 | 0.44  | 1.08E-11 | 26 | MYL12A   | Collecting duct |
| 1.83E-26 | 0.31553462 | 0.295 | 0.125 | 6.15E-22 | 26 | PLEKHH2  | Collecting duct |
| 8.68E-22 | 0.31301115 | 0.41  | 0.218 | 2.93E-17 | 26 | RHOBTB3  | Collecting duct |
| 1.85E-17 | 0.31253123 | 0.466 | 0.282 | 6.24E-13 | 26 | IVNS1ABP | Collecting duct |
| 8.20E-19 | 0.31052233 | 0.259 | 0.121 | 2.76E-14 | 26 | SETD5    | Collecting duct |
| 2.13E-36 | 0.30932896 | 0.984 | 0.798 | 7.16E-32 | 26 | TMSB10   | Collecting duct |
| 6.28E-23 | 0.30892523 | 0.383 | 0.193 | 2.12E-18 | 26 | CPM      | Collecting duct |
| 2.98E-22 | 0.30612815 | 0.34  | 0.167 | 1.00E-17 | 26 | LMO7     | Collecting duct |
| 1.39E-19 | 0.30612588 | 0.327 | 0.166 | 4.68E-15 | 26 | DCDC2    | Collecting duct |
| 8.96E-20 | 0.30385946 | 0.448 | 0.262 | 3.02E-15 | 26 | SF1      | Collecting duct |
| 8.42E-25 | 0.3033069  | 0.831 | 0.56  | 2.84E-20 | 26 | CD9      | Collecting duct |
| 7.08E-15 | 0.298905   | 0.403 | 0.242 | 2.38E-10 | 26 | PPP1R15A | Collecting duct |

|          |            |       |       |          |    |          |                 |
|----------|------------|-------|-------|----------|----|----------|-----------------|
| 1.59E-17 | 0.29804107 | 0.644 | 0.438 | 5.37E-13 | 26 | NPM1     | Collecting duct |
| 5.86E-16 | 0.29598117 | 0.635 | 0.447 | 1.98E-11 | 26 | EIF4A2   | Collecting duct |
| 3.22E-18 | 0.29537134 | 0.601 | 0.403 | 1.09E-13 | 26 | RBM39    | Collecting duct |
| 1.23E-15 | 0.29410359 | 0.295 | 0.16  | 4.13E-11 | 26 | PPP1R10  | Collecting duct |
| 1.22E-18 | 0.29383238 | 0.448 | 0.268 | 4.11E-14 | 26 | PTTG1IP  | Collecting duct |
| 9.97E-19 | 0.29173384 | 0.378 | 0.201 | 3.36E-14 | 26 | RPS4Y1   | Collecting duct |
| 1.43E-16 | 0.29112772 | 0.295 | 0.155 | 4.82E-12 | 26 | KRAS     | Collecting duct |
| 1.74E-19 | 0.29043243 | 0.486 | 0.293 | 5.85E-15 | 26 | DYNLT1   | Collecting duct |
| 1.66E-20 | 0.2884321  | 0.59  | 0.364 | 5.60E-16 | 26 | SPINT2   | Collecting duct |
| 8.10E-16 | 0.28608406 | 0.691 | 0.496 | 2.73E-11 | 26 | HNRNPA1  | Collecting duct |
| 3.78E-18 | 0.28355673 | 0.441 | 0.261 | 1.27E-13 | 26 | UBE2B    | Collecting duct |
| 3.91E-17 | 0.28209982 | 0.507 | 0.318 | 1.32E-12 | 26 | SQSTM1   | Collecting duct |
| 1.59E-18 | 0.28168492 | 0.363 | 0.194 | 5.36E-14 | 26 | IFRD1    | Collecting duct |
| 6.75E-23 | 0.28155168 | 0.266 | 0.114 | 2.27E-18 | 26 | SCD5     | Collecting duct |
| 1.38E-18 | 0.28145446 | 0.457 | 0.269 | 4.64E-14 | 26 | SYNE2    | Collecting duct |
| 1.98E-16 | 0.28081557 | 0.784 | 0.564 | 6.67E-12 | 26 | HINT1    | Collecting duct |
| 1.00E-13 | 0.28054913 | 0.291 | 0.161 | 3.38E-09 | 26 | H1FO     | Collecting duct |
| 8.01E-13 | 0.2793     | 0.351 | 0.217 | 2.70E-08 | 26 | SRSF10   | Collecting duct |
| 1.72E-17 | 0.27654887 | 0.268 | 0.131 | 5.80E-13 | 26 | MARCKSL1 | Collecting duct |
| 5.06E-14 | 0.27652916 | 0.372 | 0.224 | 1.71E-09 | 26 | MAP1LC3B | Collecting duct |
| 9.95E-17 | 0.27484092 | 0.64  | 0.429 | 3.35E-12 | 26 | HMGN1    | Collecting duct |
| 6.92E-17 | 0.27355055 | 0.441 | 0.266 | 2.33E-12 | 26 | EIF5     | Collecting duct |
| 3.91E-15 | 0.27248298 | 0.291 | 0.156 | 1.32E-10 | 26 | SERTAD1  | Collecting duct |
| 9.23E-18 | 0.27127261 | 0.383 | 0.212 | 3.11E-13 | 26 | PAX8     | Collecting duct |
| 1.80E-16 | 0.26864183 | 0.297 | 0.156 | 6.06E-12 | 26 | UBE2E3   | Collecting duct |
| 1.99E-18 | 0.26834178 | 0.606 | 0.381 | 6.71E-14 | 26 | ITGB1    | Collecting duct |
| 1.67E-16 | 0.26822659 | 0.752 | 0.518 | 5.62E-12 | 26 | DYNLL1   | Collecting duct |
| 9.29E-18 | 0.26529929 | 0.259 | 0.124 | 3.13E-13 | 26 | LBR      | Collecting duct |
| 1.69E-16 | 0.26507436 | 0.545 | 0.355 | 5.70E-12 | 26 | CSTB     | Collecting duct |
| 2.28E-12 | 0.26340335 | 0.518 | 0.357 | 7.67E-08 | 26 | CEBPD    | Collecting duct |
| 5.32E-14 | 0.26321045 | 0.444 | 0.285 | 1.79E-09 | 26 | H2AFZ    | Collecting duct |
| 6.11E-18 | 0.26282148 | 0.457 | 0.265 | 2.06E-13 | 26 | TFCP2L1  | Collecting duct |
| 3.62E-17 | 0.26054705 | 0.268 | 0.132 | 1.22E-12 | 26 | CDV3     | Collecting duct |
| 1.17E-18 | 0.2596605  | 0.347 | 0.181 | 3.94E-14 | 26 | ERRFI1   | Collecting duct |
| 3.61E-16 | 0.25771557 | 0.536 | 0.334 | 1.21E-11 | 26 | MAL      | Collecting duct |
| 4.19E-17 | 0.25712338 | 0.268 | 0.132 | 1.41E-12 | 26 | CPVL     | Collecting duct |
| 1.36E-14 | 0.25625797 | 0.694 | 0.502 | 4.58E-10 | 26 | PEBP1    | Collecting duct |
| 1.59E-14 | 0.25490152 | 0.775 | 0.563 | 5.34E-10 | 26 | S100A11  | Collecting duct |
| 6.74E-13 | 0.25466458 | 0.626 | 0.45  | 2.27E-08 | 26 | HIST1H4C | Collecting duct |
| 4.28E-16 | 0.25456899 | 0.27  | 0.136 | 1.44E-11 | 26 | HEXIM1   | Collecting duct |
| 1.81E-13 | 0.25438582 | 0.381 | 0.233 | 6.10E-09 | 26 | SFT2D1   | Collecting duct |
| 1.39E-18 | 0.25396084 | 0.351 | 0.185 | 4.67E-14 | 26 | S100A16  | Collecting duct |
| 8.08E-13 | 0.25311136 | 0.408 | 0.261 | 2.72E-08 | 26 | BRD2     | Collecting duct |
| 2.09E-17 | 0.25287624 | 0.293 | 0.147 | 7.06E-13 | 26 | TFPI     | Collecting duct |
| 3.25E-13 | 0.25227885 | 0.396 | 0.251 | 1.09E-08 | 26 | ANXA11   | Collecting duct |
| 3.30E-22 | 0.25011949 | 0.761 | 0.496 | 1.11E-17 | 26 | ATP1A1   | Collecting duct |
| 0        | 3.12138778 | 0.987 | 0.043 | 0        | 27 | PTGDS    | Principal cells |
| 0        | 2.71082065 | 0.992 | 0.076 | 0        | 27 | PODXL    | Principal cells |

|           |            |       |       |       |    |          |                 |
|-----------|------------|-------|-------|-------|----|----------|-----------------|
| 0         | 2.50948165 | 0.992 | 0.072 | 0     | 27 | HTRA1    | Principal cells |
| 0         | 2.47571866 | 0.942 | 0.019 | 0     | 27 | NPHS2    | Principal cells |
| 0         | 2.4501061  | 0.965 | 0.028 | 0     | 27 | CLIC5    | Principal cells |
| 0         | 2.35229681 | 0.952 | 0.03  | 0     | 27 | DCN      | Principal cells |
| 1.90E-163 | 2.23257312 | 0.813 | 0.313 | ##### | 27 | CXCL14   | Principal cells |
| 0         | 2.17099716 | 0.947 | 0.022 | 0     | 27 | FGF1     | Principal cells |
| 0         | 2.15325655 | 0.985 | 0.284 | 0     | 27 | IGFBP5   | Principal cells |
| 0         | 2.14322466 | 0.934 | 0.035 | 0     | 27 | MME      | Principal cells |
| 0         | 2.0869176  | 0.916 | 0.021 | 0     | 27 | PTPRO    | Principal cells |
| 0         | 2.08324437 | 0.952 | 0.084 | 0     | 27 | AIF1     | Principal cells |
| 0         | 2.04616927 | 0.942 | 0.138 | 0     | 27 | CTGF     | Principal cells |
| 0         | 2.01517079 | 0.889 | 0.014 | 0     | 27 | 11-550H2 | Principal cells |
| 0         | 1.95273373 | 0.972 | 0.093 | 0     | 27 | EMCN     | Principal cells |
| 0         | 1.92072057 | 0.934 | 0.062 | 0     | 27 | TGFB3    | Principal cells |
| 0         | 1.86928538 | 0.884 | 0.035 | 0     | 27 | SPOCK1   | Principal cells |
| 0         | 1.86813203 | 0.884 | 0.026 | 0     | 27 | TNNT2    | Principal cells |
| 0         | 1.83425051 | 0.922 | 0.11  | 0     | 27 | NPNT     | Principal cells |
| 0         | 1.8207133  | 0.949 | 0.128 | 0     | 27 | VAMP5    | Principal cells |
| 0         | 1.81101616 | 0.808 | 0.015 | 0     | 27 | PCOLCE2  | Principal cells |
| 0         | 1.78940588 | 0.825 | 0.032 | 0     | 27 | TPPP3    | Principal cells |
| 0         | 1.78539068 | 0.891 | 0.028 | 0     | 27 | PLA2R1   | Principal cells |
| 0         | 1.75523421 | 0.962 | 0.232 | 0     | 27 | CRIM1    | Principal cells |
| 0         | 1.7410066  | 0.909 | 0.13  | 0     | 27 | IGFBP2   | Principal cells |
| 0         | 1.71475801 | 0.906 | 0.142 | 0     | 27 | BST2     | Principal cells |
| 0         | 1.71216604 | 0.825 | 0.047 | 0     | 27 | MEM150   | Principal cells |
| 0         | 1.7086206  | 0.881 | 0.085 | 0     | 27 | ZDHHC6   | Principal cells |
| 0         | 1.70257429 | 0.932 | 0.174 | 0     | 27 | TJP1     | Principal cells |
| 0         | 1.6821381  | 0.944 | 0.17  | 0     | 27 | MYL9     | Principal cells |
| 4.90E-226 | 1.61540783 | 1     | 0.807 | ##### | 27 | TMSB4X   | Principal cells |
| 0         | 1.56595148 | 0.813 | 0.035 | 0     | 27 | SPOCK2   | Principal cells |
| 0         | 1.5322868  | 0.884 | 0.148 | 0     | 27 | VEGFA    | Principal cells |
| 0         | 1.53177462 | 0.754 | 0.019 | 0     | 27 | APOD     | Principal cells |
| 0         | 1.50405132 | 0.929 | 0.208 | 0     | 27 | MYH9     | Principal cells |
| 0         | 1.50120123 | 0.911 | 0.163 | 0     | 27 | TGFB2    | Principal cells |
| 0         | 1.49550794 | 0.858 | 0.123 | 0     | 27 | CDKN1C   | Principal cells |
| 0         | 1.4854914  | 0.749 | 0.013 | 0     | 27 | NDNF     | Principal cells |
| 0         | 1.4795184  | 0.777 | 0.015 | 0     | 27 | WT1      | Principal cells |
| 0         | 1.4730618  | 0.911 | 0.097 | 0     | 27 | SLC9A3R2 | Principal cells |
| 0         | 1.4511156  | 0.967 | 0.182 | 0     | 27 | SPARC    | Principal cells |
| 0         | 1.44700678 | 0.866 | 0.095 | 0     | 27 | TPM2     | Principal cells |
| 0         | 1.43920515 | 0.797 | 0.063 | 0     | 27 | SEMA5A   | Principal cells |
| 0         | 1.43164121 | 0.785 | 0.055 | 0     | 27 | ENPEP    | Principal cells |
| 0         | 1.43113951 | 0.765 | 0.041 | 0     | 27 | PDLIM2   | Principal cells |
| 0         | 1.39453467 | 0.884 | 0.183 | 0     | 27 | RARRES2  | Principal cells |
| 0         | 1.39322344 | 0.757 | 0.023 | 0     | 27 | SOST     | Principal cells |
| 0         | 1.39186981 | 0.643 | 0.011 | 0     | 27 | CLDN11   | Principal cells |
| 0         | 1.36788214 | 0.754 | 0.067 | 0     | 27 | CDC42EP3 | Principal cells |
| 0         | 1.36662861 | 0.805 | 0.068 | 0     | 27 | PLAT     | Principal cells |

|           |            |       |       |       |    |          |                 |
|-----------|------------|-------|-------|-------|----|----------|-----------------|
| 1.29E-280 | 1.36519094 | 0.866 | 0.189 | ##### | 27 | GOLIM4   | Principal cells |
| 0         | 1.36472092 | 0.787 | 0.049 | 0     | 27 | SYNPO    | Principal cells |
| 0         | 1.35852354 | 0.734 | 0.081 | 0     | 27 | SBSPON   | Principal cells |
| 0         | 1.35709858 | 0.843 | 0.116 | 0     | 27 | PLPP1    | Principal cells |
| 0         | 1.35598376 | 0.792 | 0.071 | 0     | 27 | NEBL     | Principal cells |
| 0         | 1.3538995  | 0.856 | 0.131 | 0     | 27 | UACA     | Principal cells |
| 0         | 1.32917376 | 0.671 | 0.016 | 0     | 27 | IGF1     | Principal cells |
| 0         | 1.31089474 | 0.742 | 0.062 | 0     | 27 | IQGAP2   | Principal cells |
| 1.06E-248 | 1.30610533 | 0.975 | 0.298 | ##### | 27 | TIMP3    | Principal cells |
| 0         | 1.29439153 | 0.744 | 0.043 | 0     | 27 | NES      | Principal cells |
| 3.09E-246 | 1.29053401 | 0.924 | 0.27  | ##### | 27 | ACTN4    | Principal cells |
| 8.11E-231 | 1.29025042 | 0.962 | 0.307 | ##### | 27 | LGALS1   | Principal cells |
| 0         | 1.28811738 | 0.762 | 0.061 | 0     | 27 | SRGAP2C  | Principal cells |
| 0         | 1.27069194 | 0.704 | 0.034 | 0     | 27 | CRHBP    | Principal cells |
| 0         | 1.24496435 | 0.701 | 0.043 | 0     | 27 | ALS2CL   | Principal cells |
| 0         | 1.24097578 | 0.805 | 0.136 | 0     | 27 | PLPP3    | Principal cells |
| 0         | 1.23868484 | 0.884 | 0.135 | 0     | 27 | EPAS1    | Principal cells |
| 6.88E-199 | 1.23024689 | 0.99  | 0.456 | ##### | 27 | IFITM3   | Principal cells |
| 0         | 1.22843278 | 0.732 | 0.045 | 0     | 27 | CLDN5    | Principal cells |
| 0         | 1.22622525 | 0.759 | 0.104 | 0     | 27 | COL4A3   | Principal cells |
| 0         | 1.21892968 | 0.661 | 0.025 | 0     | 27 | GAS1     | Principal cells |
| 0         | 1.21649394 | 0.666 | 0.026 | 0     | 27 | F3       | Principal cells |
| 0         | 1.21503926 | 0.899 | 0.167 | 0     | 27 | IFI27    | Principal cells |
| 0         | 1.21332546 | 0.762 | 0.094 | 0     | 27 | MAFB     | Principal cells |
| 0         | 1.21327891 | 0.668 | 0.076 | 0     | 27 | GMDS     | Principal cells |
| 3.69E-188 | 1.21169755 | 0.927 | 0.326 | ##### | 27 | ANXA2    | Principal cells |
| 0         | 1.19579007 | 0.727 | 0.083 | 0     | 27 | FOXC1    | Principal cells |
| 0         | 1.19074836 | 0.633 | 0.01  | 0     | 27 | CFAP45   | Principal cells |
| 0         | 1.18538612 | 0.658 | 0.047 | 0     | 27 | DACH1    | Principal cells |
| 0         | 1.18404893 | 0.83  | 0.126 | 0     | 27 | TIMP2    | Principal cells |
| 0         | 1.15787008 | 0.722 | 0.11  | 0     | 27 | THSD7A   | Principal cells |
| 0         | 1.149085   | 0.716 | 0.101 | 0     | 27 | EPB41L5  | Principal cells |
| 0         | 1.14228046 | 0.6   | 0.014 | 0     | 27 | TCF21    | Principal cells |
| 0         | 1.12831043 | 0.603 | 0.017 | 0     | 27 | RAMP1    | Principal cells |
| 0         | 1.1202167  | 0.641 | 0.04  | 0     | 27 | LDB2     | Principal cells |
| 0         | 1.11452421 | 0.59  | 0.021 | 0     | 27 | NFASC    | Principal cells |
| 0         | 1.0872399  | 0.613 | 0.024 | 0     | 27 | EHD3     | Principal cells |
| 0         | 1.08182327 | 0.628 | 0.025 | 0     | 27 | C14orf37 | Principal cells |
| 0         | 1.07661442 | 0.671 | 0.098 | 0     | 27 | NQO1     | Principal cells |
| 0         | 1.07290939 | 0.547 | 0.01  | 0     | 27 | TNNI1    | Principal cells |
| 2.87E-182 | 1.07192646 | 1     | 0.892 | ##### | 27 | B2M      | Principal cells |
| 2.30E-159 | 1.07030584 | 0.987 | 0.506 | ##### | 27 | HLA-B    | Principal cells |
| 6.30E-221 | 1.06130752 | 0.815 | 0.204 | ##### | 27 | RDX      | Principal cells |
| 3.83E-176 | 1.05236748 | 0.848 | 0.249 | ##### | 27 | S100A4   | Principal cells |
| 0         | 1.04858201 | 0.704 | 0.08  | 0     | 27 | SH3BP5   | Principal cells |
| 3.22E-173 | 1.04356107 | 1     | 0.804 | ##### | 27 | ITM2B    | Principal cells |
| 0         | 1.03714303 | 0.648 | 0.058 | 0     | 27 | FRY      | Principal cells |
| 1.09E-250 | 1.03360417 | 0.858 | 0.18  | ##### | 27 | MGP      | Principal cells |

|           |            |       |       |       |    |          |                 |
|-----------|------------|-------|-------|-------|----|----------|-----------------|
| 0         | 1.02536555 | 0.613 | 0.031 | 0     | 27 | F2R      | Principal cells |
| 0         | 1.01274055 | 0.562 | 0.019 | 0     | 27 | FAM89A   | Principal cells |
| 0         | 1.01244942 | 0.658 | 0.052 | 0     | 27 | PTPRD    | Principal cells |
| 0         | 1.01163603 | 0.61  | 0.048 | 0     | 27 | ARHGEF3  | Principal cells |
| 5.63E-153 | 1.00995012 | 0.987 | 0.69  | ##### | 27 | CALM2    | Principal cells |
| 0         | 1.00733081 | 0.332 | 0.018 | 0     | 27 | IL1RL1   | Principal cells |
| 0         | 1.00728008 | 0.716 | 0.095 | 0     | 27 | TCF4     | Principal cells |
| 2.46E-203 | 1.00689914 | 0.899 | 0.259 | ##### | 27 | HIPK2    | Principal cells |
| 2.25E-154 | 1.00059443 | 0.894 | 0.349 | ##### | 27 | VAMP2    | Principal cells |
| 0         | 0.99661368 | 0.6   | 0.031 | 0     | 27 | KDR      | Principal cells |
| 0         | 0.99302569 | 0.554 | 0.018 | 0     | 27 | LRRC2    | Principal cells |
| 0         | 0.99193825 | 0.557 | 0.008 | 0     | 27 | NPHS1    | Principal cells |
| 0         | 0.98596125 | 0.519 | 0.01  | 0     | 27 | INC00839 | Principal cells |
| 0         | 0.98398644 | 0.587 | 0.028 | 0     | 27 | PTGER4   | Principal cells |
| 3.11E-143 | 0.9789025  | 0.858 | 0.302 | ##### | 27 | BCAM     | Principal cells |
| 0         | 0.9782017  | 0.58  | 0.019 | 0     | 27 | SEMA3G   | Principal cells |
| 1.72E-177 | 0.97677646 | 0.896 | 0.277 | ##### | 27 | TSC22D3  | Principal cells |
| 6.74E-218 | 0.97181521 | 0.737 | 0.156 | ##### | 27 | SPRY1    | Principal cells |
| 3.58E-205 | 0.96618646 | 0.775 | 0.183 | ##### | 27 | PBX1     | Principal cells |
| 0         | 0.96413139 | 0.506 | 0.009 | 0     | 27 | NTNG1    | Principal cells |
| 3.03E-293 | 0.96369162 | 0.701 | 0.112 | ##### | 27 | PALLD    | Principal cells |
| 2.15E-173 | 0.95897745 | 0.899 | 0.297 | ##### | 27 | CD81     | Principal cells |
| 0         | 0.95487507 | 0.572 | 0.036 | 0     | 27 | PDGFRB   | Principal cells |
| 2.14E-151 | 0.95311976 | 0.924 | 0.341 | ##### | 27 | HLA-E    | Principal cells |
| 1.02E-204 | 0.95297519 | 0.906 | 0.244 | ##### | 27 | CALD1    | Principal cells |
| 0         | 0.94981634 | 0.605 | 0.065 | 0     | 27 | MPP5     | Principal cells |
| 6.46E-212 | 0.9456108  | 0.739 | 0.158 | ##### | 27 | NUPR1    | Principal cells |
| 1.71E-247 | 0.944778   | 0.716 | 0.137 | ##### | 27 | PHACTR4  | Principal cells |
| 2.57E-273 | 0.94301824 | 0.752 | 0.134 | ##### | 27 | MYLK     | Principal cells |
| 1.16E-209 | 0.94234088 | 0.752 | 0.172 | ##### | 27 | Sep-19   | Principal cells |
| 0         | 0.94223872 | 0.625 | 0.064 | 0     | 27 | SDPR     | Principal cells |
| 3.54E-151 | 0.9419832  | 0.904 | 0.301 | ##### | 27 | VIM      | Principal cells |
| 0         | 0.93610914 | 0.539 | 0.014 | 0     | 27 | SULF1    | Principal cells |
| 0         | 0.93508127 | 0.694 | 0.087 | 0     | 27 | RNASE1   | Principal cells |
| 1.71E-205 | 0.9266633  | 0.757 | 0.174 | ##### | 27 | SEC14L1  | Principal cells |
| 0         | 0.92245375 | 0.605 | 0.046 | 0     | 27 | FRMD3    | Principal cells |
| 2.12E-187 | 0.91923415 | 0.722 | 0.178 | ##### | 27 | EIF3M    | Principal cells |
| 0         | 0.91636742 | 0.522 | 0.013 | 0     | 27 | TYRO3    | Principal cells |
| 2.21E-256 | 0.90815819 | 0.777 | 0.148 | ##### | 27 | DPYSL2   | Principal cells |
| 0         | 0.9039304  | 0.618 | 0.081 | 0     | 27 | TMEM98   | Principal cells |
| 6.44E-221 | 0.90148038 | 0.671 | 0.132 | ##### | 27 | PRKCI    | Principal cells |
| 0         | 0.89554032 | 0.678 | 0.096 | 0     | 27 | MTSS1    | Principal cells |
| 9.27E-205 | 0.89412514 | 0.719 | 0.159 | ##### | 27 | SYNE1    | Principal cells |
| 0         | 0.89298994 | 0.63  | 0.077 | 0     | 27 | ZEB2     | Principal cells |
| 0         | 0.89000377 | 0.547 | 0.036 | 0     | 27 | ST3GAL6  | Principal cells |
| 2.02E-280 | 0.88931017 | 0.623 | 0.092 | ##### | 27 | TRIB2    | Principal cells |
| 0         | 0.88784177 | 0.554 | 0.051 | 0     | 27 | SRGAP2B  | Principal cells |
| 4.86E-280 | 0.88767057 | 0.673 | 0.101 | ##### | 27 | A2M      | Principal cells |

|           |            |       |       |       |    |          |                 |
|-----------|------------|-------|-------|-------|----|----------|-----------------|
| 0         | 0.8858106  | 0.537 | 0.04  | 0     | 27 | RAMP3    | Principal cells |
| 0         | 0.88416048 | 0.57  | 0.059 | 0     | 27 | FAM65A   | Principal cells |
| 0         | 0.8809178  | 0.476 | 0.007 | 0     | 27 | PHYHIP   | Principal cells |
| 0         | 0.8796814  | 0.572 | 0.057 | 0     | 27 | MEIS2    | Principal cells |
| 0         | 0.87146801 | 0.575 | 0.046 | 0     | 27 | FLT1     | Principal cells |
| 0         | 0.87146329 | 0.62  | 0.068 | 0     | 27 | RAMP2    | Principal cells |
| 4.82E-153 | 0.87142182 | 0.676 | 0.183 | ##### | 27 | VKORC1   | Principal cells |
| 6.08E-129 | 0.8647181  | 0.914 | 0.379 | ##### | 27 | ITGB1    | Principal cells |
| 6.07E-111 | 0.86429551 | 0.947 | 0.516 | ##### | 27 | DYNLL1   | Principal cells |
| 7.74E-142 | 0.86340158 | 0.881 | 0.306 | ##### | 27 | IFITM2   | Principal cells |
| 7.09E-150 | 0.86068543 | 0.676 | 0.188 | ##### | 27 | GTF2A2   | Principal cells |
| 0         | 0.85995909 | 0.582 | 0.056 | 0     | 27 | CERS6    | Principal cells |
| 0         | 0.85910955 | 0.461 | 0.016 | 0     | 27 | NECAB1   | Principal cells |
| 4.68E-137 | 0.85577666 | 0.825 | 0.285 | ##### | 27 | AHNAK    | Principal cells |
| 0         | 0.85154391 | 0.554 | 0.058 | 0     | 27 | KLHL42   | Principal cells |
| 0         | 0.84882304 | 0.476 | 0.015 | 0     | 27 | PARD6G   | Principal cells |
| 4.40E-204 | 0.84691626 | 0.656 | 0.133 | ##### | 27 | NDRG2    | Principal cells |
| 2.68E-180 | 0.84485026 | 0.785 | 0.207 | ##### | 27 | RBMS1    | Principal cells |
| 0         | 0.84331189 | 0.511 | 0.012 | 0     | 27 | ARHGAP28 | Principal cells |
| 0         | 0.84029436 | 0.565 | 0.049 | 0     | 27 | PTPRB    | Principal cells |
| 0         | 0.83619542 | 0.446 | 0.012 | 0     | 27 | CRB2     | Principal cells |
| 9.43E-170 | 0.83226846 | 0.765 | 0.206 | ##### | 27 | ARHGEF12 | Principal cells |
| 7.39E-171 | 0.82484653 | 0.727 | 0.183 | ##### | 27 | DST      | Principal cells |
| 1.15E-208 | 0.81960582 | 0.347 | 0.038 | ##### | 27 | HPGD     | Principal cells |
| 2.74E-276 | 0.8191877  | 0.587 | 0.084 | ##### | 27 | CTDSP1   | Principal cells |
| 3.49E-161 | 0.81830231 | 0.805 | 0.229 | ##### | 27 | DAB2     | Principal cells |
| 0         | 0.81717754 | 0.509 | 0.055 | 0     | 27 | CBLB     | Principal cells |
| 0         | 0.8144814  | 0.529 | 0.056 | 0     | 27 | RERG     | Principal cells |
| 0         | 0.81381575 | 0.524 | 0.035 | 0     | 27 | MGAT5    | Principal cells |
| 0         | 0.80919495 | 0.494 | 0.012 | 0     | 27 | TFGALNAC | Principal cells |
| 0         | 0.80897872 | 0.537 | 0.05  | 0     | 27 | MAP1B    | Principal cells |
| 0         | 0.80788032 | 0.514 | 0.057 | 0     | 27 | RNF220   | Principal cells |
| 1.30E-173 | 0.80672519 | 0.689 | 0.165 | ##### | 27 | FBXO21   | Principal cells |
| 2.93E-284 | 0.80096288 | 0.549 | 0.072 | ##### | 27 | KANK1    | Principal cells |
| 8.88E-143 | 0.80059998 | 0.795 | 0.246 | ##### | 27 | IL6ST    | Principal cells |
| 4.70E-114 | 0.79921986 | 0.959 | 0.479 | ##### | 27 | PSAP     | Principal cells |
| 0         | 0.79753985 | 0.476 | 0.019 | 0     | 27 | OLFML2A  | Principal cells |
| 0         | 0.79675665 | 0.532 | 0.039 | 0     | 27 | FYN      | Principal cells |
| 0         | 0.79584514 | 0.453 | 0.015 | 0     | 27 | TSPAN2   | Principal cells |
| 7.76E-108 | 0.79501797 | 0.856 | 0.381 | ##### | 27 | EID1     | Principal cells |
| 1.98E-142 | 0.79477176 | 0.744 | 0.222 | ##### | 27 | SERINC1  | Principal cells |
| 0         | 0.79440199 | 0.342 | 0.023 | 0     | 27 | ESM1     | Principal cells |
| 6.11E-268 | 0.79230932 | 0.565 | 0.079 | ##### | 27 | FLRT3    | Principal cells |
| 0         | 0.79228298 | 0.544 | 0.058 | 0     | 27 | SERINC5  | Principal cells |
| 0         | 0.79134108 | 0.456 | 0.022 | 0     | 27 | SNCA     | Principal cells |
| 2.27E-156 | 0.7851773  | 0.759 | 0.203 | ##### | 27 | GNG11    | Principal cells |
| 6.59E-240 | 0.78414525 | 0.587 | 0.095 | ##### | 27 | TNS3     | Principal cells |
| 0         | 0.78385715 | 0.456 | 0.02  | 0     | 27 | MXRA8    | Principal cells |

|           |            |       |       |          |    |          |                 |
|-----------|------------|-------|-------|----------|----|----------|-----------------|
| 0         | 0.7836355  | 0.405 | 0.006 | 0        | 27 | DPP6     | Principal cells |
| 3.89E-173 | 0.78358614 | 0.678 | 0.155 | #####    | 27 | FAM134B  | Principal cells |
| 0         | 0.7830672  | 0.425 | 0.022 | 0        | 27 | PLTP     | Principal cells |
| 0         | 0.78073188 | 0.478 | 0.036 | 0        | 27 | PARD3B   | Principal cells |
| 8.97E-117 | 0.78009485 | 0.965 | 0.446 | #####    | 27 | CD74     | Principal cells |
| 0         | 0.77841233 | 0.527 | 0.039 | 0        | 27 | SH3BGRL2 | Principal cells |
| 2.22E-120 | 0.77432522 | 0.828 | 0.302 | #####    | 27 | SPTBN1   | Principal cells |
| 0         | 0.77341855 | 0.433 | 0.006 | 0        | 27 | WT1-AS   | Principal cells |
| 0         | 0.7697776  | 0.582 | 0.066 | 0        | 27 | TNS2     | Principal cells |
| 0         | 0.76962453 | 0.471 | 0.032 | 0        | 27 | FXYD1    | Principal cells |
| 5.90E-126 | 0.76943743 | 0.797 | 0.273 | #####    | 27 | LEPROT   | Principal cells |
| 0         | 0.76713453 | 0.304 | 0.011 | 0        | 27 | CHI3L1   | Principal cells |
| 7.59E-97  | 0.76671989 | 0.927 | 0.458 | 2.56E-92 | 27 | HLA-C    | Principal cells |
| 2.30E-101 | 0.764778   | 0.927 | 0.438 | 7.75E-97 | 27 | MYL12A   | Principal cells |
| 7.16E-121 | 0.76167032 | 0.792 | 0.272 | #####    | 27 | CRIP2    | Principal cells |
| 0         | 0.75719054 | 0.501 | 0.048 | 0        | 27 | ZNRF3    | Principal cells |
| 4.81E-248 | 0.75606994 | 0.549 | 0.081 | #####    | 27 | RRAS     | Principal cells |
| 7.54E-119 | 0.75552737 | 1     | 0.817 | #####    | 27 | S100A6   | Principal cells |
| 1.49E-204 | 0.75443868 | 0.691 | 0.138 | #####    | 27 | PTRF     | Principal cells |
| 5.03E-128 | 0.75139148 | 0.709 | 0.218 | #####    | 27 | SSB      | Principal cells |
| 2.75E-119 | 0.7501726  | 0.762 | 0.242 | #####    | 27 | TIMP1    | Principal cells |
| 1.49E-171 | 0.74642822 | 0.572 | 0.119 | #####    | 27 | BNIP3L   | Principal cells |
| 1.59E-98  | 0.74581436 | 0.911 | 0.434 | 5.34E-94 | 27 | POMP     | Principal cells |
| 0         | 0.74108719 | 0.418 | 0.008 | 0        | 27 | LOX      | Principal cells |
| 2.73E-114 | 0.73492266 | 0.803 | 0.287 | #####    | 27 | PABPN1   | Principal cells |
| 0         | 0.73389831 | 0.397 | 0.005 | 0        | 27 | L1-752D2 | Principal cells |
| 0         | 0.73353435 | 0.511 | 0.053 | 0        | 27 | EFNB2    | Principal cells |
| 0         | 0.73314264 | 0.468 | 0.032 | 0        | 27 | MSRB3    | Principal cells |
| 0         | 0.73044769 | 0.428 | 0.024 | 0        | 27 | PLCE1    | Principal cells |
| 0         | 0.72659807 | 0.473 | 0.048 | 0        | 27 | RBMS3    | Principal cells |
| 3.69E-243 | 0.72558764 | 0.511 | 0.071 | #####    | 27 | TANC1    | Principal cells |
| 0         | 0.72542396 | 0.423 | 0.021 | 0        | 27 | ITGA8    | Principal cells |
| 0         | 0.7248486  | 0.41  | 0.024 | 0        | 27 | MAGI2    | Principal cells |
| 3.39E-255 | 0.72303071 | 0.6   | 0.089 | #####    | 27 | AP1S2    | Principal cells |
| 1.70E-168 | 0.7200493  | 0.577 | 0.122 | #####    | 27 | WASL     | Principal cells |
| 2.01E-117 | 0.72001879 | 0.82  | 0.298 | #####    | 27 | Sep-19   | Principal cells |
| 2.75E-180 | 0.71909238 | 0.549 | 0.104 | #####    | 27 | PDE4DIP  | Principal cells |
| 8.69E-189 | 0.71676103 | 0.625 | 0.121 | #####    | 27 | MEF2C    | Principal cells |
| 2.43E-110 | 0.71597457 | 0.663 | 0.202 | #####    | 27 | BEX5     | Principal cells |
| 9.96E-156 | 0.71449928 | 0.656 | 0.16  | #####    | 27 | PDLIM5   | Principal cells |
| 4.25E-197 | 0.71308514 | 0.534 | 0.092 | #####    | 27 | PTPN14   | Principal cells |
| 0         | 0.71192343 | 0.433 | 0.037 | 0        | 27 | RASL11B  | Principal cells |
| 7.50E-215 | 0.70858516 | 0.524 | 0.082 | #####    | 27 | MIB1     | Principal cells |
| 6.72E-307 | 0.70685726 | 0.481 | 0.051 | #####    | 27 | ARRDC2   | Principal cells |
| 2.29E-130 | 0.70660467 | 0.638 | 0.176 | #####    | 27 | WASF2    | Principal cells |
| 2.23E-97  | 0.70540683 | 0.825 | 0.346 | 7.52E-93 | 27 | SABARAPL | Principal cells |
| 3.70E-81  | 0.70505086 | 0.853 | 0.402 | 1.25E-76 | 27 | TSC22D1  | Principal cells |
| 2.87E-234 | 0.70467781 | 0.554 | 0.084 | #####    | 27 | PEA15    | Principal cells |

|           |            |       |       |          |    |          |                 |
|-----------|------------|-------|-------|----------|----|----------|-----------------|
| 0         | 0.7020076  | 0.281 | 0.007 | 0        | 27 | IL13RA2  | Principal cells |
| 0         | 0.68960861 | 0.392 | 0.005 | 0        | 27 | FMN2     | Principal cells |
| 0         | 0.68899385 | 0.395 | 0.032 | 0        | 27 | GJA1     | Principal cells |
| 4.60E-238 | 0.68538437 | 0.562 | 0.082 | #####    | 27 | EGFL7    | Principal cells |
| 1.07E-88  | 0.68364657 | 0.962 | 0.574 | 3.61E-84 | 27 | TCEB2    | Principal cells |
| 2.52E-161 | 0.68276728 | 0.537 | 0.107 | #####    | 27 | PHACTR2  | Principal cells |
| 2.59E-151 | 0.68186264 | 0.597 | 0.138 | #####    | 27 | SERINC3  | Principal cells |
| 2.17E-88  | 0.68068474 | 0.982 | 0.631 | 7.33E-84 | 27 | MYL6     | Principal cells |
| 1.46E-247 | 0.68057513 | 0.473 | 0.06  | #####    | 27 | PAK1     | Principal cells |
| 1.12E-123 | 0.67542275 | 0.691 | 0.202 | #####    | 27 | ITGAV    | Principal cells |
| 2.83E-138 | 0.6750911  | 0.562 | 0.13  | #####    | 27 | RNF145   | Principal cells |
| 1.02E-263 | 0.67492121 | 0.527 | 0.067 | #####    | 27 | ENG      | Principal cells |
| 6.71E-144 | 0.67275719 | 0.537 | 0.118 | #####    | 27 | MYLIP    | Principal cells |
| 2.19E-147 | 0.67176396 | 0.635 | 0.155 | #####    | 27 | NEDD9    | Principal cells |
| 1.05E-117 | 0.67136792 | 0.671 | 0.202 | #####    | 27 | CAPN2    | Principal cells |
| 8.58E-149 | 0.66815332 | 0.63  | 0.154 | #####    | 27 | TLN1     | Principal cells |
| 2.08E-182 | 0.66648456 | 0.559 | 0.101 | #####    | 27 | IGFBP4   | Principal cells |
| 2.72E-107 | 0.66644824 | 0.684 | 0.219 | #####    | 27 | CITED2   | Principal cells |
| 1.46E-249 | 0.66591172 | 0.524 | 0.07  | #####    | 27 | MEM178A  | Principal cells |
| 2.00E-236 | 0.66522912 | 0.453 | 0.058 | #####    | 27 | LGALS8   | Principal cells |
| 1.59E-240 | 0.66469555 | 0.415 | 0.047 | #####    | 27 | ITIH5    | Principal cells |
| 0         | 0.66215048 | 0.357 | 0.005 | 0        | 27 | PTPRQ    | Principal cells |
| 0         | 0.65868986 | 0.413 | 0.019 | 0        | 27 | SLC14A1  | Principal cells |
| 0         | 0.65866015 | 0.425 | 0.036 | 0        | 27 | EXPH5    | Principal cells |
| 3.82E-123 | 0.65715916 | 0.587 | 0.154 | #####    | 27 | SDC2     | Principal cells |
| 5.96E-104 | 0.65492185 | 0.716 | 0.248 | 2.01E-99 | 27 | CAST     | Principal cells |
| 3.54E-215 | 0.65248888 | 0.509 | 0.078 | #####    | 27 | CCDC91   | Principal cells |
| 0         | 0.6523164  | 0.354 | 0.005 | 0        | 27 | MRGPRF   | Principal cells |
| 1.63E-171 | 0.6522531  | 0.491 | 0.087 | #####    | 27 | SEMA3B   | Principal cells |
| 2.17E-263 | 0.65195917 | 0.423 | 0.045 | #####    | 27 | DLC1     | Principal cells |
| 0         | 0.65188075 | 0.339 | 0.004 | 0        | 27 | FAM180A  | Principal cells |
| 4.02E-264 | 0.64986128 | 0.463 | 0.052 | #####    | 27 | GIMAP7   | Principal cells |
| 2.68E-88  | 0.64976016 | 0.949 | 0.494 | 9.05E-84 | 27 | NUCKS1   | Principal cells |
| 4.42E-204 | 0.64959466 | 0.499 | 0.077 | #####    | 27 | FSTL1    | Principal cells |
| 6.95E-135 | 0.644133   | 0.668 | 0.176 | #####    | 27 | ETS2     | Principal cells |
| 1.98E-226 | 0.64310627 | 0.441 | 0.057 | #####    | 27 | EVA1B    | Principal cells |
| 0         | 0.64209178 | 0.415 | 0.036 | 0        | 27 | EBF1     | Principal cells |
| 9.39E-251 | 0.64179862 | 0.435 | 0.051 | #####    | 27 | TOM1L2   | Principal cells |
| 7.97E-261 | 0.63978711 | 0.425 | 0.047 | #####    | 27 | SLC17A5  | Principal cells |
| 0         | 0.63706746 | 0.4   | 0.033 | 0        | 27 | TMEM204  | Principal cells |
| 3.22E-87  | 0.628663   | 0.737 | 0.288 | 1.08E-82 | 27 | RABAC1   | Principal cells |
| 2.93E-97  | 0.62722964 | 0.803 | 0.304 | 9.89E-93 | 27 | INC00657 | Principal cells |
| 3.55E-183 | 0.62683116 | 0.451 | 0.07  | #####    | 27 | C1orf115 | Principal cells |
| 0         | 0.62434163 | 0.365 | 0.018 | 0        | 27 | CDC14A   | Principal cells |
| 1.64E-183 | 0.62423802 | 0.554 | 0.102 | #####    | 27 | ABRACL   | Principal cells |
| 8.55E-241 | 0.62296804 | 0.438 | 0.051 | #####    | 27 | APOLD1   | Principal cells |
| 0         | 0.62285607 | 0.347 | 0.01  | 0        | 27 | CCBE1    | Principal cells |
| 2.64E-160 | 0.62270372 | 0.514 | 0.099 | #####    | 27 | SLK      | Principal cells |

|           |            |       |       |          |    |         |                 |
|-----------|------------|-------|-------|----------|----|---------|-----------------|
| 5.50E-163 | 0.62165871 | 0.557 | 0.114 | #####    | 27 | FERMT2  | Principal cells |
| 7.37E-74  | 0.62117426 | 0.947 | 0.589 | 2.48E-69 | 27 | SKP1    | Principal cells |
| 0         | 0.6210168  | 0.4   | 0.019 | 0        | 27 | PRKAR2B | Principal cells |
| 1.13E-158 | 0.6181534  | 0.549 | 0.109 | #####    | 27 | ETS1    | Principal cells |
| 9.77E-130 | 0.61756791 | 0.58  | 0.144 | #####    | 27 | RFC1    | Principal cells |
| 0         | 0.61698276 | 0.367 | 0.028 | 0        | 27 | SIRPA   | Principal cells |
| 2.36E-124 | 0.6155115  | 0.658 | 0.175 | #####    | 27 | FKBP5   | Principal cells |
| 1.65E-285 | 0.61471357 | 0.385 | 0.035 | #####    | 27 | FAM43A  | Principal cells |
| 4.97E-215 | 0.61346726 | 0.428 | 0.056 | #####    | 27 | SRGAP1  | Principal cells |
| 0         | 0.61344577 | 0.359 | 0.01  | 0        | 27 | FRMD1   | Principal cells |
| 1.24E-107 | 0.61316791 | 0.668 | 0.204 | #####    | 27 | MAL2    | Principal cells |
| 2.53E-271 | 0.6115906  | 0.395 | 0.039 | #####    | 27 | USP46   | Principal cells |
| 2.77E-72  | 0.61091817 | 0.939 | 0.537 | 9.33E-68 | 27 | NGFRAP1 | Principal cells |
| 1.77E-205 | 0.61025769 | 0.471 | 0.066 | #####    | 27 | GMFG    | Principal cells |
| 3.66E-82  | 0.60837252 | 0.924 | 0.447 | 1.23E-77 | 27 | CALM1   | Principal cells |
| 1.23E-199 | 0.60770141 | 0.441 | 0.06  | #####    | 27 | PECAM1  | Principal cells |
| 8.88E-125 | 0.60699313 | 0.575 | 0.146 | #####    | 27 | TMOD3   | Principal cells |
| 6.80E-263 | 0.60655313 | 0.433 | 0.047 | #####    | 27 | LIMS2   | Principal cells |
| 2.01E-92  | 0.60402658 | 0.585 | 0.18  | 6.78E-88 | 27 | ITGB8   | Principal cells |
| 5.28E-105 | 0.60362531 | 0.587 | 0.17  | #####    | 27 | PCMTD1  | Principal cells |
| 6.11E-248 | 0.60282034 | 0.433 | 0.049 | #####    | 27 | LHFP    | Principal cells |
| 6.26E-107 | 0.60158293 | 0.673 | 0.213 | #####    | 27 | MACF1   | Principal cells |
| 4.76E-95  | 0.59972324 | 0.686 | 0.235 | 1.60E-90 | 27 | BEX4    | Principal cells |
| 0         | 0.59912359 | 0.322 | 0.004 | 0        | 27 | DDN     | Principal cells |
| 4.57E-113 | 0.59826162 | 0.615 | 0.175 | #####    | 27 | PAM     | Principal cells |
| 6.81E-263 | 0.59816662 | 0.41  | 0.043 | #####    | 27 | NDN     | Principal cells |
| 1.22E-132 | 0.59757575 | 0.468 | 0.097 | #####    | 27 | GULP1   | Principal cells |
| 8.25E-78  | 0.59757006 | 0.851 | 0.392 | 2.78E-73 | 27 | HMGN3   | Principal cells |
| 1.76E-186 | 0.59569969 | 0.519 | 0.087 | #####    | 27 | G0S2    | Principal cells |
| 1.27E-180 | 0.59550769 | 0.441 | 0.068 | #####    | 27 | SASH1   | Principal cells |
| 3.30E-215 | 0.59521854 | 0.403 | 0.049 | #####    | 27 | ZEB1    | Principal cells |
| 1.45E-217 | 0.59509733 | 0.387 | 0.046 | #####    | 27 | INF2    | Principal cells |
| 1.91E-124 | 0.59394282 | 0.491 | 0.111 | #####    | 27 | MYO1C   | Principal cells |
| 3.58E-158 | 0.59151698 | 0.549 | 0.112 | #####    | 27 | PCMTD2  | Principal cells |
| 4.12E-179 | 0.59130447 | 0.443 | 0.069 | #####    | 27 | RASSF8  | Principal cells |
| 6.07E-191 | 0.59050721 | 0.737 | 0.149 | #####    | 27 | ADGRF5  | Principal cells |
| 2.28E-144 | 0.58879387 | 0.529 | 0.111 | #####    | 27 | TMEM47  | Principal cells |
| 1.80E-87  | 0.58859143 | 0.805 | 0.32  | 6.06E-83 | 27 | FKBP1A  | Principal cells |
| 2.11E-65  | 0.58837529 | 0.947 | 0.502 | 7.12E-61 | 27 | HLA-A   | Principal cells |
| 2.19E-107 | 0.58796281 | 0.62  | 0.18  | #####    | 27 | STAT1   | Principal cells |
| 1.29E-292 | 0.58690001 | 0.42  | 0.04  | #####    | 27 | EFNB1   | Principal cells |
| 3.53E-182 | 0.58606586 | 0.473 | 0.077 | #####    | 27 | PMEPA1  | Principal cells |
| 3.25E-298 | 0.58550237 | 0.395 | 0.035 | #####    | 27 | RGS10   | Principal cells |
| 2.92E-266 | 0.58464312 | 0.4   | 0.04  | #####    | 27 | SDC3    | Principal cells |
| 1.84E-144 | 0.58450233 | 0.628 | 0.148 | #####    | 27 | EMP3    | Principal cells |
| 3.37E-89  | 0.58360288 | 0.759 | 0.293 | 1.13E-84 | 27 | DYNLRB1 | Principal cells |
| 6.45E-115 | 0.58332599 | 0.567 | 0.151 | #####    | 27 | SPTAN1  | Principal cells |
| 4.19E-135 | 0.58276679 | 0.451 | 0.088 | #####    | 27 | TSPAN7  | Principal cells |

|           |            |       |       |          |    |          |                 |
|-----------|------------|-------|-------|----------|----|----------|-----------------|
| 5.55E-105 | 0.58224852 | 0.509 | 0.13  | #####    | 27 | CCND1    | Principal cells |
| 1.46E-76  | 0.58131697 | 0.727 | 0.296 | 4.91E-72 | 27 | BRK1     | Principal cells |
| 6.18E-179 | 0.58076122 | 0.473 | 0.078 | #####    | 27 | DHRS3    | Principal cells |
| 3.87E-273 | 0.57949216 | 0.408 | 0.041 | #####    | 27 | NPR1     | Principal cells |
| 6.03E-163 | 0.57924805 | 0.625 | 0.13  | #####    | 27 | TM4SF1   | Principal cells |
| 2.22E-89  | 0.57732357 | 0.77  | 0.296 | 7.49E-85 | 27 | CSDE1    | Principal cells |
| 4.43E-103 | 0.57470261 | 0.625 | 0.189 | 1.49E-98 | 27 | ADD3     | Principal cells |
| 0         | 0.57456146 | 0.327 | 0.01  | 0        | 27 | BMP7     | Principal cells |
| 3.62E-181 | 0.57445702 | 0.471 | 0.076 | #####    | 27 | KANK2    | Principal cells |
| 0         | 0.57428888 | 0.347 | 0.014 | 0        | 27 | WIPF3    | Principal cells |
| 1.85E-200 | 0.57300443 | 0.37  | 0.045 | #####    | 27 | TSHZ1    | Principal cells |
| 7.26E-112 | 0.57286077 | 0.511 | 0.128 | #####    | 27 | DNAJB9   | Principal cells |
| 1.11E-116 | 0.57269245 | 0.595 | 0.159 | #####    | 27 | QKI      | Principal cells |
| 0         | 0.57193897 | 0.319 | 0.008 | 0        | 27 | ANKS1B   | Principal cells |
| 8.40E-155 | 0.5713282  | 0.473 | 0.088 | #####    | 27 | TMCO3    | Principal cells |
| 3.83E-60  | 0.57000909 | 0.929 | 0.542 | 1.29E-55 | 27 | CD63     | Principal cells |
| 6.14E-78  | 0.56965323 | 0.886 | 0.406 | 2.07E-73 | 27 | ANAPC16  | Principal cells |
| 8.16E-73  | 0.56822091 | 0.656 | 0.25  | 2.75E-68 | 27 | CD151    | Principal cells |
| 1.81E-84  | 0.56692229 | 0.711 | 0.267 | 6.09E-80 | 27 | PSMB1    | Principal cells |
| 1.61E-83  | 0.56548063 | 0.81  | 0.335 | 5.41E-79 | 27 | SEPP1    | Principal cells |
| 0         | 0.56402611 | 0.344 | 0.023 | 0        | 27 | FAM101B  | Principal cells |
| 4.62E-74  | 0.56321886 | 0.825 | 0.366 | 1.56E-69 | 27 | CNN3     | Principal cells |
| 1.52E-91  | 0.56309223 | 0.663 | 0.226 | 5.14E-87 | 27 | CNBP     | Principal cells |
| 6.39E-138 | 0.56275226 | 0.478 | 0.098 | #####    | 27 | TSPAN4   | Principal cells |
| 3.61E-174 | 0.5620884  | 0.415 | 0.063 | #####    | 27 | APBB2    | Principal cells |
| 2.68E-172 | 0.56196963 | 0.365 | 0.049 | #####    | 27 | DOCK5    | Principal cells |
| 5.27E-125 | 0.56178013 | 0.506 | 0.118 | #####    | 27 | IP6K2    | Principal cells |
| 0         | 0.56076892 | 0.304 | 0.004 | 0        | 27 | KLK7     | Principal cells |
| 1.04E-119 | 0.56070097 | 0.496 | 0.117 | #####    | 27 | PVRL2    | Principal cells |
| 5.98E-65  | 0.55992609 | 0.881 | 0.455 | 2.02E-60 | 27 | OAZ1     | Principal cells |
| 1.27E-126 | 0.55909207 | 0.537 | 0.126 | #####    | 27 | GNAI2    | Principal cells |
| 4.81E-291 | 0.55881164 | 0.382 | 0.034 | #####    | 27 | SRGAP2   | Principal cells |
| 0         | 0.55698961 | 0.314 | 0.014 | 0        | 27 | ARHGEF26 | Principal cells |
| 0         | 0.55690262 | 0.352 | 0.017 | 0        | 27 | CA10     | Principal cells |
| 3.68E-72  | 0.55318433 | 0.777 | 0.334 | 1.24E-67 | 27 | C4orf3   | Principal cells |
| 0         | 0.55310692 | 0.314 | 0.014 | 0        | 27 | IL1RAP   | Principal cells |
| 2.19E-107 | 0.55186536 | 0.689 | 0.214 | #####    | 27 | GSN      | Principal cells |
| 3.36E-116 | 0.5518522  | 0.418 | 0.088 | #####    | 27 | P3H2     | Principal cells |
| 4.97E-165 | 0.55030518 | 0.481 | 0.084 | #####    | 27 | FNBP1    | Principal cells |
| 2.99E-89  | 0.55027528 | 0.625 | 0.204 | 1.01E-84 | 27 | LENG8    | Principal cells |
| 6.12E-83  | 0.54558857 | 0.709 | 0.259 | 2.06E-78 | 27 | ARHGAP29 | Principal cells |
| 0         | 0.54487287 | 0.311 | 0.012 | 0        | 27 | PHACTR3  | Principal cells |
| 3.67E-85  | 0.54347636 | 0.724 | 0.239 | 1.24E-80 | 27 | XIST     | Principal cells |
| 7.25E-91  | 0.54227343 | 0.58  | 0.181 | 2.44E-86 | 27 | NFIC     | Principal cells |
| 0         | 0.5421576  | 0.329 | 0.014 | 0        | 27 | HECW2    | Principal cells |
| 4.73E-192 | 0.54143772 | 0.362 | 0.045 | #####    | 27 | HSPA12A  | Principal cells |
| 2.55E-97  | 0.54093781 | 0.633 | 0.196 | 8.59E-93 | 27 | KLF9     | Principal cells |
| 4.44E-83  | 0.54081118 | 0.582 | 0.195 | 1.50E-78 | 27 | H2AFJ    | Principal cells |

|           |            |       |       |          |    |          |                 |
|-----------|------------|-------|-------|----------|----|----------|-----------------|
| 2.35E-120 | 0.53963626 | 0.646 | 0.17  | #####    | 27 | PTH1R    | Principal cells |
| 3.43E-70  | 0.53866169 | 0.98  | 0.655 | 1.16E-65 | 27 | H3F3B    | Principal cells |
| 2.46E-63  | 0.5381082  | 0.896 | 0.465 | 8.28E-59 | 27 | SUMO2    | Principal cells |
| 3.06E-153 | 0.53748662 | 0.476 | 0.086 | #####    | 27 | SLC7A8   | Principal cells |
| 7.40E-84  | 0.53175278 | 0.663 | 0.23  | 2.49E-79 | 27 | STMN1    | Principal cells |
| 7.21E-114 | 0.53158958 | 0.476 | 0.11  | #####    | 27 | BMPR2    | Principal cells |
| 3.21E-178 | 0.52983125 | 0.385 | 0.053 | #####    | 27 | AFAP1L2  | Principal cells |
| 1.12E-69  | 0.52959923 | 0.757 | 0.319 | 3.78E-65 | 27 | TRMT112  | Principal cells |
| 5.16E-230 | 0.52911889 | 0.352 | 0.036 | #####    | 27 | TBX3     | Principal cells |
| 7.52E-137 | 0.52829746 | 0.395 | 0.07  | #####    | 27 | TCEAL2   | Principal cells |
| 1.03E-94  | 0.52774821 | 0.496 | 0.134 | 3.47E-90 | 27 | PLA2G16  | Principal cells |
| 6.51E-47  | 0.52772376 | 0.841 | 0.448 | 2.19E-42 | 27 | HIST1H4C | Principal cells |
| 6.68E-69  | 0.52683005 | 0.886 | 0.424 | 2.25E-64 | 27 | CCNI     | Principal cells |
| 2.68E-69  | 0.52669997 | 0.696 | 0.286 | 9.05E-65 | 27 | C12orf57 | Principal cells |
| 0         | 0.52531233 | 0.296 | 0.015 | 0        | 27 | KLK6     | Principal cells |
| 2.01E-241 | 0.52450413 | 0.365 | 0.036 | #####    | 27 | TMTC1    | Principal cells |
| 1.44E-137 | 0.52225618 | 0.496 | 0.1   | #####    | 27 | MAF      | Principal cells |
| 3.82E-73  | 0.52128512 | 0.77  | 0.322 | 1.29E-68 | 27 | ARF6     | Principal cells |
| 4.19E-62  | 0.51918569 | 0.79  | 0.373 | 1.41E-57 | 27 | ERH      | Principal cells |
| 3.85E-290 | 0.51914331 | 0.357 | 0.03  | #####    | 27 | TCF7L1   | Principal cells |
| 0         | 0.51868734 | 0.289 | 0.006 | 0        | 27 | VSIG8    | Principal cells |
| 8.34E-86  | 0.5184151  | 0.696 | 0.243 | 2.81E-81 | 27 | SPATS2L  | Principal cells |
| 1.71E-64  | 0.51806576 | 0.982 | 0.675 | 5.77E-60 | 27 | H3F3A    | Principal cells |
| 3.84E-147 | 0.51481815 | 0.423 | 0.074 | #####    | 27 | DCBLD2   | Principal cells |
| 2.13E-117 | 0.51460924 | 0.486 | 0.111 | #####    | 27 | NRP1     | Principal cells |
| 1.03E-60  | 0.51431533 | 0.992 | 0.704 | 3.45E-56 | 27 | IGFBP7   | Principal cells |
| 2.33E-127 | 0.51313354 | 0.476 | 0.102 | #####    | 27 | O538757  | Principal cells |
| 1.49E-164 | 0.51085453 | 0.494 | 0.085 | #####    | 27 | BGN      | Principal cells |
| 1.34E-235 | 0.51022016 | 0.37  | 0.039 | #####    | 27 | T6GALNAC | Principal cells |
| 5.63E-104 | 0.51008334 | 0.441 | 0.104 | 1.90E-99 | 27 | MXD4     | Principal cells |
| 1.22E-182 | 0.50945546 | 0.4   | 0.056 | #####    | 27 | MYO1E    | Principal cells |
| 5.25E-100 | 0.50923555 | 0.501 | 0.132 | 1.77E-95 | 27 | AP3S1    | Principal cells |
| 2.98E-58  | 0.5073949  | 0.861 | 0.432 | 1.00E-53 | 27 | ATP6V1G1 | Principal cells |
| 7.05E-195 | 0.50447349 | 0.362 | 0.043 | #####    | 27 | GIMAP4   | Principal cells |
| 1.28E-196 | 0.50404343 | 0.359 | 0.043 | #####    | 27 | LIX1L    | Principal cells |
| 2.06E-101 | 0.50372054 | 0.496 | 0.126 | 6.95E-97 | 27 | UTRN     | Principal cells |
| 7.26E-84  | 0.503565   | 0.704 | 0.253 | 2.44E-79 | 27 | PTMS     | Principal cells |
| 1.27E-90  | 0.50299968 | 0.633 | 0.207 | 4.26E-86 | 27 | KIF5B    | Principal cells |
| 2.02E-111 | 0.50252978 | 0.413 | 0.087 | #####    | 27 | FGFR1    | Principal cells |
| 1.99E-58  | 0.50226032 | 0.904 | 0.48  | 6.70E-54 | 27 | RAC1     | Principal cells |
| 3.22E-199 | 0.50200241 | 0.329 | 0.036 | #####    | 27 | C1R      | Principal cells |
| 4.60E-140 | 0.50179956 | 0.408 | 0.071 | #####    | 27 | NOTCH2   | Principal cells |
| 1.73E-81  | 0.50037118 | 0.59  | 0.199 | 5.84E-77 | 27 | NFE2L1   | Principal cells |
| 3.39E-241 | 0.50031055 | 0.327 | 0.029 | #####    | 27 | NRGN     | Principal cells |
| 2.30E-111 | 0.49964513 | 0.676 | 0.193 | #####    | 27 | THBS1    | Principal cells |
| 9.89E-50  | 0.49926523 | 0.873 | 0.463 | 3.33E-45 | 27 | MYL12B   | Principal cells |
| 0         | 0.49921837 | 0.253 | 0.01  | 0        | 27 | 11-251M1 | Principal cells |
| 4.03E-98  | 0.4985906  | 0.572 | 0.166 | 1.36E-93 | 27 | TCEAL3   | Principal cells |

|           |            |       |       |          |    |          |                 |
|-----------|------------|-------|-------|----------|----|----------|-----------------|
| 3.49E-221 | 0.4983985  | 0.291 | 0.025 | #####    | 27 | FCN3     | Principal cells |
| 5.57E-132 | 0.4983321  | 0.413 | 0.078 | #####    | 27 | PARVA    | Principal cells |
| 9.76E-72  | 0.49823877 | 0.62  | 0.232 | 3.29E-67 | 27 | MRFAP1   | Principal cells |
| 1.92E-267 | 0.49801444 | 0.314 | 0.025 | #####    | 27 | RGL1     | Principal cells |
| 1.37E-104 | 0.49726584 | 0.438 | 0.102 | #####    | 27 | ATXN10   | Principal cells |
| 2.36E-120 | 0.49605964 | 0.403 | 0.079 | #####    | 27 | DAG1     | Principal cells |
| 7.81E-103 | 0.49234733 | 0.468 | 0.116 | 2.63E-98 | 27 | C9orf3   | Principal cells |
| 3.07E-111 | 0.49218302 | 0.405 | 0.085 | #####    | 27 | ANO6     | Principal cells |
| 9.86E-100 | 0.49187368 | 0.435 | 0.103 | 3.32E-95 | 27 | PSMB9    | Principal cells |
| 9.47E-149 | 0.49169446 | 0.428 | 0.075 | #####    | 27 | KLF7     | Principal cells |
| 4.84E-89  | 0.49065743 | 1     | 0.902 | 1.63E-84 | 27 | PTMA     | Principal cells |
| 3.86E-86  | 0.48991049 | 0.544 | 0.166 | 1.30E-81 | 27 | PAWR     | Principal cells |
| 1.94E-70  | 0.48984478 | 0.846 | 0.371 | 6.53E-66 | 27 | ARGLU1   | Principal cells |
| 3.74E-161 | 0.48962921 | 0.38  | 0.056 | #####    | 27 | TM4SF18  | Principal cells |
| 6.23E-113 | 0.48872127 | 0.522 | 0.129 | #####    | 27 | PSIP1    | Principal cells |
| 1.52E-58  | 0.48840057 | 0.982 | 0.636 | 5.14E-54 | 27 | HMGB1    | Principal cells |
| 3.39E-84  | 0.48824548 | 0.592 | 0.193 | 1.14E-79 | 27 | PURA     | Principal cells |
| 1.04E-101 | 0.48695423 | 0.504 | 0.129 | 3.49E-97 | 27 | MARCKSL1 | Principal cells |
| 3.18E-57  | 0.48601604 | 0.818 | 0.388 | 1.07E-52 | 27 | NEDD8    | Principal cells |
| 0         | 0.48478599 | 0.253 | 0.003 | 0        | 27 | CR1      | Principal cells |
| 2.15E-102 | 0.48458398 | 0.562 | 0.154 | 7.24E-98 | 27 | PTPRG    | Principal cells |
| 3.33E-94  | 0.48414514 | 0.522 | 0.145 | 1.12E-89 | 27 | HIPK3    | Principal cells |
| 7.91E-86  | 0.4837728  | 0.506 | 0.15  | 2.67E-81 | 27 | C1orf122 | Principal cells |
| 4.34E-121 | 0.48317991 | 0.466 | 0.101 | #####    | 27 | SPATA13  | Principal cells |
| 3.41E-85  | 0.48294656 | 0.592 | 0.191 | 1.15E-80 | 27 | ARMCX3   | Principal cells |
| 1.44E-57  | 0.48250511 | 0.792 | 0.383 | 4.85E-53 | 27 | RBX1     | Principal cells |
| 1.04E-57  | 0.48204973 | 0.709 | 0.313 | 3.51E-53 | 27 | PARK7    | Principal cells |
| 5.96E-71  | 0.48113201 | 0.722 | 0.287 | 2.01E-66 | 27 | PRMT2    | Principal cells |
| 2.42E-119 | 0.48081216 | 0.377 | 0.071 | #####    | 27 | SGCB     | Principal cells |
| 1.38E-86  | 0.48040252 | 0.552 | 0.168 | 4.65E-82 | 27 | TMEM245  | Principal cells |
| 2.03E-213 | 0.47969193 | 0.367 | 0.04  | #####    | 27 | CD34     | Principal cells |
| 2.77E-109 | 0.4795259  | 0.413 | 0.088 | #####    | 27 | TEAD1    | Principal cells |
| 1.00E-103 | 0.47921402 | 0.509 | 0.13  | 3.37E-99 | 27 | ITGA3    | Principal cells |
| 6.34E-106 | 0.47752301 | 0.532 | 0.139 | #####    | 27 | PCYOX1   | Principal cells |
| 2.39E-81  | 0.47631542 | 0.524 | 0.162 | 8.04E-77 | 27 | TMEM14A  | Principal cells |
| 2.44E-90  | 0.47598204 | 0.458 | 0.122 | 8.21E-86 | 27 | PRMT1    | Principal cells |
| 2.73E-69  | 0.47532473 | 0.699 | 0.277 | 9.19E-65 | 27 | TMEM50A  | Principal cells |
| 2.50E-80  | 0.47478731 | 0.575 | 0.187 | 8.41E-76 | 27 | CD47     | Principal cells |
| 3.76E-137 | 0.47452768 | 0.286 | 0.038 | #####    | 27 | C1S      | Principal cells |
| 4.99E-70  | 0.47354912 | 0.481 | 0.155 | 1.68E-65 | 27 | PCMT1    | Principal cells |
| 1.40E-77  | 0.47333574 | 0.623 | 0.216 | 4.71E-73 | 27 | RBPMS    | Principal cells |
| 2.46E-124 | 0.47318998 | 0.443 | 0.09  | #####    | 27 | CSR1     | Principal cells |
| 3.70E-56  | 0.47151926 | 0.691 | 0.307 | 1.25E-51 | 27 | DAD1     | Principal cells |
| 3.47E-121 | 0.47116761 | 0.413 | 0.082 | #####    | 27 | COL4A4   | Principal cells |
| 2.38E-161 | 0.47105587 | 0.327 | 0.043 | #####    | 27 | TXNRD2   | Principal cells |
| 3.58E-219 | 0.47049258 | 0.385 | 0.044 | #####    | 27 | MTHFD2   | Principal cells |
| 2.41E-77  | 0.46935771 | 0.851 | 0.346 | 8.12E-73 | 27 | PDK4     | Principal cells |
| 2.02E-62  | 0.46793608 | 0.747 | 0.326 | 6.82E-58 | 27 | NAA38    | Principal cells |

|           |            |       |       |          |    |               |                 |
|-----------|------------|-------|-------|----------|----|---------------|-----------------|
| 7.25E-52  | 0.46761141 | 0.944 | 0.564 | 2.44E-47 | 27 | MORF4L1       | Principal cells |
| 4.06E-94  | 0.46734307 | 0.62  | 0.18  | 1.37E-89 | 27 | KLF2          | Principal cells |
| 6.25E-90  | 0.46660698 | 0.722 | 0.249 | 2.11E-85 | 27 | CPEB4         | Principal cells |
| 1.92E-54  | 0.46638291 | 0.709 | 0.324 | 6.47E-50 | 27 | SEC61B        | Principal cells |
| 1.33E-48  | 0.46627321 | 0.927 | 0.564 | 4.48E-44 | 27 | CIRBP         | Principal cells |
| 1.46E-83  | 0.46615233 | 0.481 | 0.137 | 4.92E-79 | 27 | CD99          | Principal cells |
| 5.36E-56  | 0.46612942 | 0.858 | 0.43  | 1.81E-51 | 27 | NCL           | Principal cells |
| 3.16E-129 | 0.46568881 | 0.395 | 0.072 | #####    | 27 | SLC48A1       | Principal cells |
| 2.87E-222 | 0.46567805 | 0.337 | 0.034 | #####    | 27 | LMO2          | Principal cells |
| 3.56E-97  | 0.46471406 | 0.438 | 0.106 | 1.20E-92 | 27 | PTPN12        | Principal cells |
| 7.77E-91  | 0.46455266 | 0.458 | 0.119 | 2.62E-86 | 27 | LAMB2         | Principal cells |
| 8.92E-73  | 0.46444117 | 0.772 | 0.308 | 3.01E-68 | 27 | NFKBIA        | Principal cells |
| 0         | 0.46270383 | 0.258 | 0.005 | 0        | 27 | 11-180C1      | Principal cells |
| 1.76E-84  | 0.46203591 | 0.557 | 0.173 | 5.94E-80 | 27 | PJA2          | Principal cells |
| 8.49E-173 | 0.46155423 | 0.294 | 0.033 | #####    | 27 | DOCK4         | Principal cells |
| 1.89E-76  | 0.46143641 | 0.646 | 0.233 | 6.37E-72 | 27 | 14-3-3PHOSPH8 | Principal cells |
| 2.08E-163 | 0.46142025 | 0.294 | 0.034 | #####    | 27 | LTBP4         | Principal cells |
| 3.02E-76  | 0.45940285 | 0.641 | 0.228 | 1.02E-71 | 27 | CHURC1        | Principal cells |
| 1.38E-110 | 0.45939004 | 0.395 | 0.081 | #####    | 27 | MAST4         | Principal cells |
| 4.35E-128 | 0.45901404 | 0.385 | 0.069 | #####    | 27 | RAI14         | Principal cells |
| 2.40E-102 | 0.45834477 | 0.506 | 0.128 | 8.07E-98 | 27 | MYO1B         | Principal cells |
| 1.75E-51  | 0.45785896 | 0.77  | 0.363 | 5.89E-47 | 27 | SPINT2        | Principal cells |
| 1.33E-62  | 0.45723378 | 0.729 | 0.312 | 4.49E-58 | 27 | SRP9          | Principal cells |
| 3.58E-124 | 0.45624619 | 0.385 | 0.071 | #####    | 27 | ITGB5         | Principal cells |
| 4.24E-47  | 0.45502204 | 0.891 | 0.479 | 1.43E-42 | 27 | PFN1          | Principal cells |
| 1.20E-62  | 0.45421404 | 0.633 | 0.252 | 4.05E-58 | 27 | RHEB          | Principal cells |
| 2.55E-72  | 0.45287499 | 0.57  | 0.198 | 8.59E-68 | 27 | SBDS          | Principal cells |
| 5.78E-74  | 0.45219199 | 0.494 | 0.156 | 1.95E-69 | 27 | CLTB          | Principal cells |
| 2.64E-103 | 0.45141824 | 0.433 | 0.101 | 8.90E-99 | 27 | SORT1         | Principal cells |
| 6.13E-253 | 0.45138089 | 0.296 | 0.023 | #####    | 27 | RAPGEF4       | Principal cells |
| 1.31E-123 | 0.45133658 | 0.387 | 0.071 | #####    | 27 | ITGA1         | Principal cells |
| 4.12E-89  | 0.45090568 | 0.486 | 0.132 | 1.39E-84 | 27 | CARHSP1       | Principal cells |
| 1.42E-117 | 0.45086758 | 0.542 | 0.128 | #####    | 27 | HLA-DRB5      | Principal cells |
| 1.00E-75  | 0.45031291 | 0.557 | 0.183 | 3.38E-71 | 27 | GNAQ          | Principal cells |
| 4.12E-75  | 0.449887   | 0.577 | 0.193 | 1.39E-70 | 27 | CEBPB         | Principal cells |
| 1.07E-85  | 0.44946396 | 0.514 | 0.147 | 3.60E-81 | 27 | LY6E          | Principal cells |
| 9.93E-268 | 0.44882852 | 0.299 | 0.022 | #####    | 27 | TEK           | Principal cells |
| 1.39E-47  | 0.44821728 | 0.954 | 0.643 | 4.68E-43 | 27 | ACTG1         | Principal cells |
| 5.43E-150 | 0.44720066 | 0.357 | 0.053 | #####    | 27 | BAIAP2        | Principal cells |
| 1.30E-49  | 0.4459548  | 0.858 | 0.442 | 4.38E-45 | 27 | RPL36AL       | Principal cells |
| 1.31E-91  | 0.44537618 | 0.415 | 0.1   | 4.41E-87 | 27 | GAS6          | Principal cells |
| 2.14E-133 | 0.44477648 | 0.332 | 0.051 | #####    | 27 | ARHGEF17      | Principal cells |
| 1.41E-64  | 0.44365001 | 0.658 | 0.262 | 4.75E-60 | 27 | BLOC1S1       | Principal cells |
| 6.60E-101 | 0.44354868 | 0.372 | 0.078 | 2.22E-96 | 27 | CKAP4         | Principal cells |
| 1.96E-143 | 0.44335184 | 0.359 | 0.055 | #####    | 27 | NR2F1         | Principal cells |
| 3.99E-134 | 0.44222475 | 0.334 | 0.052 | #####    | 27 | SULF2         | Principal cells |
| 6.96E-51  | 0.44134637 | 0.873 | 0.463 | 2.35E-46 | 27 | WBP5          | Principal cells |
| 8.93E-130 | 0.44080376 | 0.38  | 0.067 | #####    | 27 | GSTA4         | Principal cells |

|           |            |       |       |          |    |          |                 |
|-----------|------------|-------|-------|----------|----|----------|-----------------|
| 4.15E-74  | 0.44074989 | 0.722 | 0.276 | 1.40E-69 | 27 | LUC7L3   | Principal cells |
| 5.17E-55  | 0.43962323 | 0.653 | 0.282 | 1.74E-50 | 27 | COX7A2L  | Principal cells |
| 1.32E-91  | 0.4385701  | 0.511 | 0.141 | 4.44E-87 | 27 | FAT1     | Principal cells |
| 5.63E-96  | 0.43853364 | 0.365 | 0.077 | 1.90E-91 | 27 | ARRDC4   | Principal cells |
| 2.77E-103 | 0.43813713 | 0.357 | 0.07  | 9.34E-99 | 27 | DAMTS9-A | Principal cells |
| 1.17E-91  | 0.43743211 | 0.489 | 0.132 | 3.96E-87 | 27 | SMAD5    | Principal cells |
| 4.69E-57  | 0.43702047 | 0.575 | 0.222 | 1.58E-52 | 27 | GADD45A  | Principal cells |
| 1.39E-139 | 0.43670907 | 0.322 | 0.047 | #####    | 27 | STON2    | Principal cells |
| 2.83E-184 | 0.43567621 | 0.342 | 0.04  | #####    | 27 | ADGRL4   | Principal cells |
| 1.32E-61  | 0.43564106 | 0.62  | 0.246 | 4.46E-57 | 27 | CHMP5    | Principal cells |
| 1.02E-89  | 0.43553347 | 0.382 | 0.089 | 3.43E-85 | 27 | CALCOCO1 | Principal cells |
| 3.71E-75  | 0.43537962 | 0.516 | 0.164 | 1.25E-70 | 27 | MED4     | Principal cells |
| 1.33E-65  | 0.43506438 | 0.775 | 0.329 | 4.50E-61 | 27 | HP1BP3   | Principal cells |
| 6.13E-115 | 0.43461778 | 0.372 | 0.07  | #####    | 27 | CDKN1B   | Principal cells |
| 3.72E-180 | 0.43434848 | 0.299 | 0.032 | #####    | 27 | FRZB     | Principal cells |
| 1.29E-73  | 0.43392414 | 0.562 | 0.191 | 4.34E-69 | 27 | SIVA1    | Principal cells |
| 2.11E-89  | 0.43377035 | 0.559 | 0.167 | 7.10E-85 | 27 | RAD21    | Principal cells |
| 9.08E-56  | 0.43306903 | 0.775 | 0.353 | 3.06E-51 | 27 | SNX3     | Principal cells |
| 3.27E-105 | 0.43304062 | 0.352 | 0.068 | #####    | 27 | NEK7     | Principal cells |
| 3.07E-53  | 0.43156854 | 0.818 | 0.389 | 1.03E-48 | 27 | RHOA     | Principal cells |
| 2.75E-70  | 0.43143321 | 0.552 | 0.19  | 9.26E-66 | 27 | TM2D1    | Principal cells |
| 1.09E-71  | 0.43090614 | 0.567 | 0.194 | 3.67E-67 | 27 | IFI27L2  | Principal cells |
| 3.24E-139 | 0.4307895  | 0.309 | 0.044 | #####    | 27 | B4GAT1   | Principal cells |
| 3.88E-46  | 0.43046248 | 0.944 | 0.582 | 1.31E-41 | 27 | SEC62    | Principal cells |
| 0         | 0.42947816 | 0.271 | 0.014 | 0        | 27 | ARHGAP23 | Principal cells |
| 0         | 0.4288907  | 0.284 | 0.016 | 0        | 27 | PRX      | Principal cells |
| 2.34E-45  | 0.42866567 | 0.871 | 0.467 | 7.89E-41 | 27 | CFL1     | Principal cells |
| 2.96E-67  | 0.42865562 | 0.767 | 0.319 | 9.97E-63 | 27 | HNRNPM   | Principal cells |
| 2.13E-94  | 0.4276696  | 0.395 | 0.089 | 7.19E-90 | 27 | NR3C1    | Principal cells |
| 1.27E-296 | 0.42760702 | 0.268 | 0.016 | #####    | 27 | AMIGO2   | Principal cells |
| 0         | 0.42748152 | 0.266 | 0.007 | 0        | 27 | F5       | Principal cells |
| 4.61E-44  | 0.42700061 | 0.942 | 0.597 | 1.55E-39 | 27 | COX7A2   | Principal cells |
| 2.31E-97  | 0.42690157 | 0.433 | 0.103 | 7.80E-93 | 27 | SSBP3    | Principal cells |
| 1.69E-93  | 0.42673939 | 0.428 | 0.103 | 5.69E-89 | 27 | CCDC85B  | Principal cells |
| 9.39E-194 | 0.42581057 | 0.299 | 0.03  | #####    | 27 | MCC      | Principal cells |
| 1.18E-87  | 0.42537549 | 0.423 | 0.105 | 3.99E-83 | 27 | ZNF503   | Principal cells |
| 1.15E-59  | 0.42533837 | 0.782 | 0.342 | 3.87E-55 | 27 | YBX3     | Principal cells |
| 5.04E-116 | 0.42449424 | 0.327 | 0.056 | #####    | 27 | DSTYK    | Principal cells |
| 4.27E-89  | 0.42404574 | 0.337 | 0.072 | 1.44E-84 | 27 | VASN     | Principal cells |
| 8.59E-230 | 0.42397321 | 0.291 | 0.025 | #####    | 27 | MRVI1    | Principal cells |
| 4.33E-77  | 0.42340981 | 0.484 | 0.145 | 1.46E-72 | 27 | ERLEC1   | Principal cells |
| 5.65E-77  | 0.42334886 | 0.405 | 0.109 | 1.90E-72 | 27 | WRB      | Principal cells |
| 4.77E-42  | 0.42263994 | 0.98  | 0.727 | 1.61E-37 | 27 | SERF2    | Principal cells |
| 3.50E-89  | 0.42206659 | 0.403 | 0.097 | 1.18E-84 | 27 | OPTN     | Principal cells |
| 8.35E-72  | 0.42176708 | 0.466 | 0.141 | 2.81E-67 | 27 | H1FX     | Principal cells |
| 5.37E-101 | 0.42049694 | 0.316 | 0.059 | 1.81E-96 | 27 | NAPEPLD  | Principal cells |
| 7.60E-66  | 0.42023003 | 0.61  | 0.227 | 2.56E-61 | 27 | DEK      | Principal cells |
| 5.75E-75  | 0.42000665 | 0.456 | 0.133 | 1.94E-70 | 27 | PIK3C2A  | Principal cells |

|           |            |       |       |          |    |          |                 |
|-----------|------------|-------|-------|----------|----|----------|-----------------|
| 4.87E-46  | 0.41981863 | 0.886 | 0.49  | 1.64E-41 | 27 | SEC61G   | Principal cells |
| 1.21E-70  | 0.41940821 | 0.585 | 0.196 | 4.08E-66 | 27 | TPM4     | Principal cells |
| 3.64E-73  | 0.41852903 | 0.413 | 0.114 | 1.23E-68 | 27 | LIFR     | Principal cells |
| 4.07E-121 | 0.41822284 | 0.362 | 0.064 | #####    | 27 | RABGAP1L | Principal cells |
| 1.74E-52  | 0.4174442  | 0.987 | 0.643 | 5.86E-48 | 27 | DSTN     | Principal cells |
| 3.56E-62  | 0.41711931 | 0.522 | 0.186 | 1.20E-57 | 27 | RCN2     | Principal cells |
| 6.20E-85  | 0.41629767 | 0.38  | 0.09  | 2.09E-80 | 27 | AMOTL2   | Principal cells |
| 5.41E-66  | 0.41539363 | 0.443 | 0.139 | 1.82E-61 | 27 | ARL3     | Principal cells |
| 1.64E-57  | 0.41452197 | 0.494 | 0.179 | 5.54E-53 | 27 | PSMB5    | Principal cells |
| 6.69E-162 | 0.41421508 | 0.261 | 0.028 | #####    | 27 | EDIL3    | Principal cells |
| 1.54E-112 | 0.41391311 | 0.461 | 0.101 | #####    | 27 | LBH      | Principal cells |
| 1.48E-72  | 0.41376029 | 0.481 | 0.15  | 5.00E-68 | 27 | RNASEH2C | Principal cells |
| 8.96E-51  | 0.41300212 | 0.808 | 0.387 | 3.02E-46 | 27 | YWHAB    | Principal cells |
| 1.68E-121 | 0.41285113 | 0.309 | 0.048 | #####    | 27 | EMP2     | Principal cells |
| 2.78E-45  | 0.41114567 | 0.873 | 0.474 | 9.36E-41 | 27 | APLP2    | Principal cells |
| 1.55E-67  | 0.41072485 | 0.499 | 0.165 | 5.21E-63 | 27 | TBCB     | Principal cells |
| 8.25E-68  | 0.41002626 | 0.542 | 0.184 | 2.78E-63 | 27 | S100A16  | Principal cells |
| 1.29E-94  | 0.40889024 | 0.284 | 0.051 | 4.36E-90 | 27 | NLK      | Principal cells |
| 3.46E-55  | 0.40860781 | 0.8   | 0.374 | 1.17E-50 | 27 | ATOX1    | Principal cells |
| 2.57E-152 | 0.40810692 | 0.319 | 0.042 | #####    | 27 | HEG1     | Principal cells |
| 1.13E-50  | 0.40775035 | 0.696 | 0.308 | 3.81E-46 | 27 | SELM     | Principal cells |
| 2.86E-48  | 0.40725681 | 0.79  | 0.386 | 9.63E-44 | 27 | PCBP1    | Principal cells |
| 3.99E-48  | 0.40691979 | 0.929 | 0.506 | 1.35E-43 | 27 | DDX17    | Principal cells |
| 9.19E-106 | 0.40687479 | 0.316 | 0.055 | #####    | 27 | FN1      | Principal cells |
| 3.28E-59  | 0.40686223 | 0.686 | 0.286 | 1.10E-54 | 27 | SRRM2    | Principal cells |
| 7.33E-112 | 0.40509114 | 0.37  | 0.071 | #####    | 27 | TNRC6C   | Principal cells |
| 9.04E-67  | 0.40377326 | 0.387 | 0.111 | 3.04E-62 | 27 | TUSC3    | Principal cells |
| 1.47E-46  | 0.40364317 | 0.861 | 0.45  | 4.94E-42 | 27 | HSP90B1  | Principal cells |
| 2.67E-117 | 0.40350197 | 0.281 | 0.042 | #####    | 27 | GALC     | Principal cells |
| 4.93E-55  | 0.4031299  | 0.572 | 0.228 | 1.66E-50 | 27 | NDUFAF3  | Principal cells |
| 2.58E-78  | 0.40276125 | 0.473 | 0.138 | 8.69E-74 | 27 | RAD23B   | Principal cells |
| 1.94E-70  | 0.40230193 | 0.473 | 0.148 | 6.54E-66 | 27 | CYB5B    | Principal cells |
| 1.74E-153 | 0.40216087 | 0.324 | 0.043 | #####    | 27 | SLCO2A1  | Principal cells |
| 0         | 0.40206832 | 0.251 | 0.008 | 0        | 27 | HS3ST3B1 | Principal cells |
| 1.60E-52  | 0.40177389 | 0.856 | 0.426 | 5.40E-48 | 27 | SON      | Principal cells |
| 2.39E-129 | 0.40138866 | 0.311 | 0.046 | #####    | 27 | ICAM2    | Principal cells |
| 6.74E-38  | 0.40135051 | 0.919 | 0.554 | 2.27E-33 | 27 | POLR2L   | Principal cells |
| 1.71E-74  | 0.40085518 | 0.648 | 0.23  | 5.78E-70 | 27 | ARPC5    | Principal cells |
| 3.10E-42  | 0.40065352 | 0.8   | 0.408 | 1.05E-37 | 27 | CYB5A    | Principal cells |
| 8.10E-72  | 0.39999388 | 0.686 | 0.249 | 2.73E-67 | 27 | SGK1     | Principal cells |
| 8.87E-130 | 0.39979141 | 0.263 | 0.034 | #####    | 27 | WWC3     | Principal cells |
| 3.38E-67  | 0.39882287 | 0.423 | 0.126 | 1.14E-62 | 27 | MUM1     | Principal cells |
| 6.46E-54  | 0.39862171 | 0.997 | 0.807 | 2.18E-49 | 27 | ACTB     | Principal cells |
| 9.63E-58  | 0.39772392 | 0.582 | 0.227 | 3.25E-53 | 27 | CAP1     | Principal cells |
| 4.34E-84  | 0.39754142 | 0.286 | 0.055 | 1.46E-79 | 27 | ANKRD44  | Principal cells |
| 2.56E-111 | 0.39745149 | 0.347 | 0.064 | #####    | 27 | CAMSAP2  | Principal cells |
| 2.29E-60  | 0.39559573 | 0.463 | 0.156 | 7.73E-56 | 27 | TRIM56   | Principal cells |
| 2.52E-66  | 0.3952285  | 0.448 | 0.14  | 8.50E-62 | 27 | SERPINB6 | Principal cells |

|           |            |       |       |          |    |          |                 |
|-----------|------------|-------|-------|----------|----|----------|-----------------|
| 3.64E-60  | 0.39510022 | 0.676 | 0.276 | 1.23E-55 | 27 | TCEAL8   | Principal cells |
| 6.34E-174 | 0.39401304 | 0.271 | 0.028 | #####    | 27 | TMCC3    | Principal cells |
| 1.11E-107 | 0.39362942 | 0.329 | 0.059 | #####    | 27 | ZSWIM6   | Principal cells |
| 5.21E-54  | 0.39308515 | 0.694 | 0.302 | 1.76E-49 | 27 | TMBIM4   | Principal cells |
| 1.24E-141 | 0.3922625  | 0.278 | 0.035 | #####    | 27 | FXVD6    | Principal cells |
| 6.53E-89  | 0.3912108  | 0.428 | 0.105 | 2.20E-84 | 27 | PLEKHA2  | Principal cells |
| 2.04E-42  | 0.39119733 | 0.689 | 0.335 | 6.87E-38 | 27 | PRDX6    | Principal cells |
| 3.83E-64  | 0.39083485 | 0.446 | 0.141 | 1.29E-59 | 27 | TMEM30A  | Principal cells |
| 1.34E-134 | 0.39069957 | 0.284 | 0.038 | #####    | 27 | CLIP4    | Principal cells |
| 1.25E-61  | 0.3905442  | 0.478 | 0.163 | 4.20E-57 | 27 | TMEM256  | Principal cells |
| 7.45E-119 | 0.39029853 | 0.278 | 0.041 | #####    | 27 | GRB10    | Principal cells |
| 4.06E-59  | 0.38974282 | 0.504 | 0.18  | 1.37E-54 | 27 | CYB5R3   | Principal cells |
| 2.66E-199 | 0.3893436  | 0.278 | 0.026 | #####    | 27 | BTNL9    | Principal cells |
| 2.24E-82  | 0.38894878 | 0.327 | 0.072 | 7.54E-78 | 27 | AKT3     | Principal cells |
| 1.28E-55  | 0.38793309 | 0.494 | 0.181 | 4.33E-51 | 27 | RNF7     | Principal cells |
| 5.20E-59  | 0.38766575 | 0.724 | 0.305 | 1.75E-54 | 27 | FIS1     | Principal cells |
| 9.09E-78  | 0.38729142 | 0.395 | 0.103 | 3.06E-73 | 27 | TCEA2    | Principal cells |
| 1.18E-112 | 0.38726447 | 0.291 | 0.045 | #####    | 27 | PLAC9    | Principal cells |
| 5.43E-85  | 0.38713604 | 0.342 | 0.076 | 1.83E-80 | 27 | APPBP2   | Principal cells |
| 3.43E-67  | 0.38691439 | 0.433 | 0.131 | 1.16E-62 | 27 | FEZ2     | Principal cells |
| 5.40E-112 | 0.38680662 | 0.281 | 0.043 | #####    | 27 | NOTCH4   | Principal cells |
| 2.50E-59  | 0.38669075 | 0.615 | 0.241 | 8.44E-55 | 27 | RAB7A    | Principal cells |
| 2.18E-133 | 0.38587827 | 0.273 | 0.035 | #####    | 27 | C10orf54 | Principal cells |
| 9.66E-163 | 0.38523595 | 0.251 | 0.025 | #####    | 27 | FAM167B  | Principal cells |
| 3.92E-65  | 0.38417652 | 0.443 | 0.137 | 1.32E-60 | 27 | CXADR    | Principal cells |
| 9.44E-55  | 0.38318766 | 0.562 | 0.219 | 3.18E-50 | 27 | BANF1    | Principal cells |
| 1.24E-64  | 0.38312805 | 0.628 | 0.236 | 4.19E-60 | 27 | CTNND1   | Principal cells |
| 3.42E-52  | 0.38292769 | 0.565 | 0.227 | 1.15E-47 | 27 | PAIP2    | Principal cells |
| 1.39E-47  | 0.38277169 | 0.787 | 0.38  | 4.69E-43 | 27 | EIF4G2   | Principal cells |
| 1.84E-137 | 0.38240021 | 0.354 | 0.054 | #####    | 27 | PCAT19   | Principal cells |
| 2.83E-66  | 0.38231903 | 0.527 | 0.182 | 9.52E-62 | 27 | NME3     | Principal cells |
| 2.21E-76  | 0.38225423 | 0.403 | 0.106 | 7.46E-72 | 27 | BNIP2    | Principal cells |
| 1.10E-68  | 0.38162793 | 0.39  | 0.108 | 3.70E-64 | 27 | PAPSS1   | Principal cells |
| 1.66E-136 | 0.38138532 | 0.299 | 0.041 | #####    | 27 | ST3GAL1  | Principal cells |
| 2.59E-95  | 0.38048289 | 0.334 | 0.066 | 8.73E-91 | 27 | ADAMTS9  | Principal cells |
| 1.15E-56  | 0.37994247 | 0.42  | 0.137 | 3.87E-52 | 27 | STX7     | Principal cells |
| 1.30E-91  | 0.37917136 | 0.314 | 0.061 | 4.37E-87 | 27 | ESAM     | Principal cells |
| 2.41E-90  | 0.37842035 | 0.294 | 0.056 | 8.11E-86 | 27 | RBMS2    | Principal cells |
| 5.92E-57  | 0.37825031 | 0.554 | 0.208 | 1.99E-52 | 27 | BRI3     | Principal cells |
| 1.44E-60  | 0.3779039  | 0.554 | 0.203 | 4.85E-56 | 27 | FCGRT    | Principal cells |
| 6.40E-49  | 0.37772664 | 0.628 | 0.274 | 2.16E-44 | 27 | TGOLN2   | Principal cells |
| 1.02E-62  | 0.37770293 | 0.592 | 0.22  | 3.44E-58 | 27 | YTHDC1   | Principal cells |
| 7.78E-60  | 0.37723484 | 0.443 | 0.143 | 2.62E-55 | 27 | SLC44A1  | Principal cells |
| 1.27E-56  | 0.37706666 | 0.676 | 0.284 | 4.29E-52 | 27 | RAB2A    | Principal cells |
| 4.80E-49  | 0.37690102 | 0.709 | 0.327 | 1.62E-44 | 27 | C11orf58 | Principal cells |
| 6.04E-63  | 0.37660038 | 0.592 | 0.22  | 2.04E-58 | 27 | ZFAND6   | Principal cells |
| 1.06E-84  | 0.37604494 | 0.311 | 0.065 | 3.58E-80 | 27 | SUN2     | Principal cells |
| 6.86E-62  | 0.37570064 | 0.625 | 0.233 | 2.31E-57 | 27 | APOE     | Principal cells |

|           |            |       |       |          |    |          |                 |
|-----------|------------|-------|-------|----------|----|----------|-----------------|
| 7.80E-72  | 0.37548541 | 0.405 | 0.112 | 2.63E-67 | 27 | SLC44A2  | Principal cells |
| 5.00E-42  | 0.37545335 | 0.866 | 0.448 | 1.69E-37 | 27 | BTF3     | Principal cells |
| 4.87E-71  | 0.37451668 | 0.395 | 0.109 | 1.64E-66 | 27 | CALU     | Principal cells |
| 7.92E-57  | 0.37411006 | 0.478 | 0.168 | 2.67E-52 | 27 | DYNC1LI2 | Principal cells |
| 1.55E-85  | 0.37404967 | 0.428 | 0.109 | 5.21E-81 | 27 | SEL1L    | Principal cells |
| 1.81E-84  | 0.37368708 | 0.377 | 0.089 | 6.08E-80 | 27 | NPDC1    | Principal cells |
| 3.20E-49  | 0.37334086 | 0.803 | 0.38  | 1.08E-44 | 27 | NAP1L1   | Principal cells |
| 1.58E-62  | 0.37327662 | 0.716 | 0.289 | 5.32E-58 | 27 | GLUL     | Principal cells |
| 1.66E-57  | 0.3727526  | 0.461 | 0.158 | 5.59E-53 | 27 | MEM179   | Principal cells |
| 3.49E-88  | 0.37239318 | 0.347 | 0.075 | 1.18E-83 | 27 | HYAL2    | Principal cells |
| 1.41E-56  | 0.37217704 | 0.59  | 0.231 | 4.76E-52 | 27 | PSMB6    | Principal cells |
| 1.41E-58  | 0.37216667 | 0.656 | 0.267 | 4.75E-54 | 27 | RTF1     | Principal cells |
| 2.36E-78  | 0.37140557 | 0.377 | 0.094 | 7.95E-74 | 27 | NRIP1    | Principal cells |
| 3.04E-110 | 0.37052603 | 0.268 | 0.041 | #####    | 27 | SMIM1    | Principal cells |
| 6.34E-63  | 0.37045504 | 0.441 | 0.14  | 2.14E-58 | 27 | FNDC3B   | Principal cells |
| 2.87E-44  | 0.37029131 | 0.803 | 0.395 | 9.69E-40 | 27 | NPC2     | Principal cells |
| 3.32E-53  | 0.36990944 | 0.557 | 0.219 | 1.12E-48 | 27 | TMEM219  | Principal cells |
| 1.19E-78  | 0.36973128 | 0.719 | 0.248 | 4.01E-74 | 27 | COX7A1   | Principal cells |
| 7.52E-58  | 0.36912575 | 0.719 | 0.299 | 2.53E-53 | 27 | MSI2     | Principal cells |
| 2.78E-133 | 0.3688911  | 0.327 | 0.049 | #####    | 27 | C013461  | Principal cells |
| 2.88E-125 | 0.36813055 | 0.281 | 0.039 | #####    | 27 | TMEM88   | Principal cells |
| 1.50E-52  | 0.36804174 | 0.734 | 0.327 | 5.05E-48 | 27 | ARL6IP4  | Principal cells |
| 1.43E-168 | 0.36795933 | 0.271 | 0.028 | #####    | 27 | PLXND1   | Principal cells |
| 1.89E-57  | 0.36697148 | 0.395 | 0.125 | 6.37E-53 | 27 | OAZ2     | Principal cells |
| 2.62E-70  | 0.36665237 | 0.435 | 0.128 | 8.82E-66 | 27 | DYNLT3   | Principal cells |
| 8.07E-100 | 0.36591452 | 0.322 | 0.06  | 2.72E-95 | 27 | ARNT     | Principal cells |
| 6.32E-54  | 0.36578514 | 0.59  | 0.235 | 2.13E-49 | 27 | VPS29    | Principal cells |
| 8.67E-41  | 0.36572951 | 0.848 | 0.445 | 2.92E-36 | 27 | EIF4A2   | Principal cells |
| 4.95E-69  | 0.36528628 | 0.42  | 0.122 | 1.67E-64 | 27 | VGLL4    | Principal cells |
| 4.77E-50  | 0.36411385 | 0.554 | 0.225 | 1.61E-45 | 27 | VDAC2    | Principal cells |
| 3.99E-69  | 0.36407489 | 0.309 | 0.074 | 1.35E-64 | 27 | OSBPL1A  | Principal cells |
| 2.16E-53  | 0.36376523 | 0.425 | 0.145 | 7.29E-49 | 27 | ABI2     | Principal cells |
| 6.32E-147 | 0.36319188 | 0.296 | 0.037 | #####    | 27 | MEG3     | Principal cells |
| 3.74E-53  | 0.36288081 | 0.62  | 0.251 | 1.26E-48 | 27 | RBM3     | Principal cells |
| 1.42E-65  | 0.36234954 | 0.476 | 0.154 | 4.77E-61 | 27 | RSF1     | Principal cells |
| 4.73E-76  | 0.36230487 | 0.41  | 0.107 | 1.59E-71 | 27 | ARHGDIB  | Principal cells |
| 2.11E-112 | 0.36192274 | 0.868 | 0.301 | #####    | 27 | HLA-DRA  | Principal cells |
| 8.85E-44  | 0.36113807 | 0.392 | 0.142 | 2.98E-39 | 27 | LIMCH1   | Principal cells |
| 1.74E-54  | 0.36110315 | 0.514 | 0.192 | 5.88E-50 | 27 | WAC      | Principal cells |
| 5.11E-59  | 0.36023551 | 0.448 | 0.148 | 1.72E-54 | 27 | KMT2A    | Principal cells |
| 7.56E-93  | 0.36014578 | 0.268 | 0.046 | 2.55E-88 | 27 | C5orf56  | Principal cells |
| 5.03E-57  | 0.35984827 | 0.534 | 0.195 | 1.70E-52 | 27 | DUSP23   | Principal cells |
| 1.38E-102 | 0.35952639 | 0.273 | 0.044 | 4.66E-98 | 27 | LRP11    | Principal cells |
| 2.24E-52  | 0.35917634 | 0.722 | 0.323 | 7.54E-48 | 27 | SELK     | Principal cells |
| 3.50E-116 | 0.35846769 | 0.258 | 0.035 | #####    | 27 | SERPINB9 | Principal cells |
| 3.35E-62  | 0.35821534 | 0.575 | 0.205 | 1.13E-57 | 27 | PTBP3    | Principal cells |
| 3.88E-137 | 0.35817602 | 0.284 | 0.037 | #####    | 27 | IQSEC1   | Principal cells |
| 3.40E-45  | 0.35816485 | 0.719 | 0.337 | 1.15E-40 | 27 | SAP18    | Principal cells |

|           |            |       |       |          |    |          |                 |
|-----------|------------|-------|-------|----------|----|----------|-----------------|
| 2.72E-88  | 0.35784657 | 0.382 | 0.088 | 9.17E-84 | 27 | EVL      | Principal cells |
| 8.50E-67  | 0.35765138 | 0.453 | 0.139 | 2.86E-62 | 27 | CHPT1    | Principal cells |
| 6.51E-60  | 0.35746745 | 0.408 | 0.126 | 2.19E-55 | 27 | TINAGL1  | Principal cells |
| 8.70E-40  | 0.35714866 | 0.83  | 0.447 | 2.93E-35 | 27 | KTN1     | Principal cells |
| 1.39E-53  | 0.35694513 | 0.643 | 0.269 | 4.70E-49 | 27 | TPM3     | Principal cells |
| 2.04E-92  | 0.35656297 | 0.322 | 0.064 | 6.87E-88 | 27 | KAT7     | Principal cells |
| 3.81E-61  | 0.35643959 | 0.329 | 0.089 | 1.28E-56 | 27 | SAV1     | Principal cells |
| 3.04E-53  | 0.35604528 | 0.539 | 0.209 | 1.03E-48 | 27 | CAPZB    | Principal cells |
| 2.08E-62  | 0.35517208 | 0.387 | 0.115 | 7.02E-58 | 27 | PPP1CC   | Principal cells |
| 1.20E-161 | 0.35474311 | 0.263 | 0.028 | #####    | 27 | COL3A1   | Principal cells |
| 3.96E-82  | 0.35428447 | 0.319 | 0.069 | 1.33E-77 | 27 | ANKRD40  | Principal cells |
| 1.43E-86  | 0.35414668 | 0.367 | 0.083 | 4.81E-82 | 27 | RNF38    | Principal cells |
| 1.71E-36  | 0.3538967  | 0.772 | 0.413 | 5.77E-32 | 27 | TMEM258  | Principal cells |
| 1.92E-38  | 0.35361648 | 0.825 | 0.44  | 6.48E-34 | 27 | SRSF5    | Principal cells |
| 7.04E-75  | 0.35360101 | 0.357 | 0.089 | 2.37E-70 | 27 | HEBP1    | Principal cells |
| 2.07E-69  | 0.35317857 | 0.476 | 0.148 | 6.96E-65 | 27 | ZBTB38   | Principal cells |
| 2.11E-65  | 0.35296567 | 0.542 | 0.185 | 7.11E-61 | 27 | PLS3     | Principal cells |
| 2.30E-51  | 0.35275603 | 0.542 | 0.213 | 7.74E-47 | 27 | PPP2CB   | Principal cells |
| 7.01E-82  | 0.3527131  | 0.294 | 0.06  | 2.36E-77 | 27 | TACC2    | Principal cells |
| 1.17E-93  | 0.35234586 | 0.301 | 0.056 | 3.96E-89 | 27 | ZADH2    | Principal cells |
| 2.12E-56  | 0.35201539 | 0.537 | 0.2   | 7.14E-52 | 27 | INC01420 | Principal cells |
| 1.10E-55  | 0.35181841 | 0.387 | 0.123 | 3.72E-51 | 27 | PLD3     | Principal cells |
| 3.01E-61  | 0.35150399 | 0.438 | 0.139 | 1.02E-56 | 27 | SCARB2   | Principal cells |
| 3.08E-57  | 0.35087608 | 0.463 | 0.158 | 1.04E-52 | 27 | ANKRD11  | Principal cells |
| 4.42E-53  | 0.35069551 | 0.4   | 0.133 | 1.49E-48 | 27 | CAND1    | Principal cells |
| 3.70E-58  | 0.35052354 | 0.509 | 0.181 | 1.25E-53 | 27 | ANP32B   | Principal cells |
| 8.24E-118 | 0.35044883 | 0.585 | 0.139 | #####    | 27 | SRGN     | Principal cells |
| 4.86E-60  | 0.35033804 | 0.458 | 0.15  | 1.64E-55 | 27 | FBXL5    | Principal cells |
| 2.75E-96  | 0.3493315  | 0.304 | 0.056 | 9.28E-92 | 27 | MDFIC    | Principal cells |
| 6.37E-54  | 0.34882856 | 0.514 | 0.191 | 2.14E-49 | 27 | LGALS3BP | Principal cells |
| 2.46E-55  | 0.3481432  | 0.641 | 0.264 | 8.30E-51 | 27 | PPIG     | Principal cells |
| 1.99E-30  | 0.34766356 | 0.919 | 0.596 | 6.72E-26 | 27 | PPIA     | Principal cells |
| 3.91E-46  | 0.34754789 | 0.63  | 0.275 | 1.32E-41 | 27 | ANAPC11  | Principal cells |
| 2.35E-57  | 0.34639755 | 0.463 | 0.157 | 7.92E-53 | 27 | LUC7L2   | Principal cells |
| 1.81E-44  | 0.34638016 | 0.562 | 0.24  | 6.10E-40 | 27 | PSMB3    | Principal cells |
| 2.05E-74  | 0.3463639  | 0.377 | 0.094 | 6.92E-70 | 27 | ITM2A    | Principal cells |
| 8.98E-64  | 0.34592541 | 0.395 | 0.116 | 3.03E-59 | 27 | CALCOCO2 | Principal cells |
| 6.91E-72  | 0.3455086  | 0.362 | 0.093 | 2.33E-67 | 27 | CTNNAL1  | Principal cells |
| 3.80E-92  | 0.34511457 | 0.405 | 0.093 | 1.28E-87 | 27 | GPNMB    | Principal cells |
| 7.92E-72  | 0.34491114 | 0.405 | 0.111 | 2.67E-67 | 27 | IFNGR1   | Principal cells |
| 1.66E-63  | 0.34472903 | 0.509 | 0.17  | 5.59E-59 | 27 | YWHAG    | Principal cells |
| 3.18E-50  | 0.34442552 | 0.532 | 0.211 | 1.07E-45 | 27 | ARF1     | Principal cells |
| 2.99E-41  | 0.34437084 | 0.699 | 0.329 | 1.01E-36 | 27 | NDUFB8   | Principal cells |
| 5.73E-97  | 0.3443495  | 0.403 | 0.088 | 1.93E-92 | 27 | FHL1     | Principal cells |
| 1.47E-60  | 0.34401153 | 0.329 | 0.089 | 4.95E-56 | 27 | NCSTN    | Principal cells |
| 2.66E-32  | 0.34397613 | 0.838 | 0.468 | 8.97E-28 | 27 | OST4     | Principal cells |
| 7.41E-56  | 0.34392033 | 0.511 | 0.186 | 2.50E-51 | 27 | PICALM   | Principal cells |
| 2.95E-71  | 0.34359031 | 0.365 | 0.095 | 9.94E-67 | 27 | ROCK2    | Principal cells |

|           |            |       |       |          |    |          |                 |
|-----------|------------|-------|-------|----------|----|----------|-----------------|
| 8.43E-70  | 0.34311138 | 0.428 | 0.123 | 2.84E-65 | 27 | ROCK1    | Principal cells |
| 3.65E-56  | 0.34286362 | 0.342 | 0.101 | 1.23E-51 | 27 | TERF1    | Principal cells |
| 2.72E-59  | 0.34284902 | 0.463 | 0.154 | 9.17E-55 | 27 | GOLGA4   | Principal cells |
| 6.20E-31  | 0.34264981 | 0.919 | 0.563 | 2.09E-26 | 27 | HINT1    | Principal cells |
| 6.21E-48  | 0.34223875 | 0.509 | 0.201 | 2.09E-43 | 27 | TMED9    | Principal cells |
| 3.13E-61  | 0.34092632 | 0.453 | 0.143 | 1.05E-56 | 27 | RCAN1    | Principal cells |
| 1.02E-42  | 0.34083605 | 0.77  | 0.375 | 3.43E-38 | 27 | MYEOV2   | Principal cells |
| 2.22E-52  | 0.34059916 | 0.468 | 0.169 | 7.47E-48 | 27 | RERE     | Principal cells |
| 1.80E-48  | 0.34007026 | 0.671 | 0.293 | 6.05E-44 | 27 | PDIA3    | Principal cells |
| 1.56E-54  | 0.33996983 | 0.463 | 0.163 | 5.27E-50 | 27 | DCTN3    | Principal cells |
| 6.16E-68  | 0.33994296 | 0.441 | 0.132 | 2.08E-63 | 27 | MAGT1    | Principal cells |
| 6.33E-69  | 0.33984013 | 0.395 | 0.109 | 2.13E-64 | 27 | CREB3L2  | Principal cells |
| 2.02E-58  | 0.33969117 | 0.435 | 0.142 | 6.80E-54 | 27 | RNF11    | Principal cells |
| 7.44E-64  | 0.33960194 | 0.438 | 0.137 | 2.51E-59 | 27 | DGUOK    | Principal cells |
| 4.43E-85  | 0.33909028 | 0.271 | 0.051 | 1.49E-80 | 27 | C6orf203 | Principal cells |
| 6.49E-32  | 0.33893356 | 0.896 | 0.552 | 2.19E-27 | 27 | TOMM7    | Principal cells |
| 2.06E-39  | 0.33875138 | 0.833 | 0.434 | 6.93E-35 | 27 | SUB1     | Principal cells |
| 1.44E-72  | 0.33851699 | 0.284 | 0.062 | 4.85E-68 | 27 | TMEM11   | Principal cells |
| 1.08E-50  | 0.33850225 | 0.392 | 0.132 | 3.65E-46 | 27 | NUCB1    | Principal cells |
| 9.00E-36  | 0.33846106 | 0.838 | 0.443 | 3.03E-31 | 27 | PRDX1    | Principal cells |
| 8.02E-49  | 0.3384382  | 0.311 | 0.095 | 2.70E-44 | 27 | ETHE1    | Principal cells |
| 3.62E-113 | 0.33795438 | 0.271 | 0.04  | #####    | 27 | FAM20B   | Principal cells |
| 7.87E-51  | 0.33782077 | 0.511 | 0.196 | 2.65E-46 | 27 | BBX      | Principal cells |
| 1.77E-77  | 0.33775096 | 0.324 | 0.074 | 5.98E-73 | 27 | DCTD     | Principal cells |
| 1.45E-58  | 0.337595   | 0.38  | 0.115 | 4.89E-54 | 27 | IMP3     | Principal cells |
| 9.81E-51  | 0.3375433  | 0.547 | 0.217 | 3.31E-46 | 27 | DUT      | Principal cells |
| 9.22E-44  | 0.33716072 | 0.815 | 0.396 | 3.11E-39 | 27 | N4BP2L2  | Principal cells |
| 2.18E-59  | 0.33712413 | 0.342 | 0.096 | 7.34E-55 | 27 | METTL5   | Principal cells |
| 5.97E-39  | 0.33680944 | 0.777 | 0.398 | 2.01E-34 | 27 | NDUFB4   | Principal cells |
| 9.62E-43  | 0.33628563 | 0.352 | 0.121 | 3.24E-38 | 27 | COL4A2   | Principal cells |
| 1.86E-107 | 0.33596872 | 0.263 | 0.04  | #####    | 27 | FAM114A1 | Principal cells |
| 1.55E-63  | 0.33580706 | 0.397 | 0.115 | 5.23E-59 | 27 | HLA-DMA  | Principal cells |
| 1.11E-65  | 0.33556288 | 0.39  | 0.109 | 3.75E-61 | 27 | CMIP     | Principal cells |
| 3.29E-76  | 0.33495218 | 0.387 | 0.1   | 1.11E-71 | 27 | CDC42BPA | Principal cells |
| 5.78E-92  | 0.33467678 | 0.289 | 0.053 | 1.95E-87 | 27 | COL4A5   | Principal cells |
| 9.15E-43  | 0.33445975 | 0.719 | 0.343 | 3.08E-38 | 27 | CD164    | Principal cells |
| 1.12E-64  | 0.33436145 | 0.284 | 0.067 | 3.77E-60 | 27 | EHD4     | Principal cells |
| 1.20E-66  | 0.33430187 | 0.4   | 0.114 | 4.05E-62 | 27 | 17-189H2 | Principal cells |
| 2.14E-49  | 0.33425409 | 0.511 | 0.197 | 7.21E-45 | 27 | MTPN     | Principal cells |
| 1.69E-59  | 0.33419405 | 0.43  | 0.137 | 5.71E-55 | 27 | VCL      | Principal cells |
| 5.13E-49  | 0.33373879 | 0.641 | 0.275 | 1.73E-44 | 27 | HNRNPD   | Principal cells |
| 3.34E-81  | 0.33358115 | 0.268 | 0.052 | 1.12E-76 | 27 | SQRDL    | Principal cells |
| 2.79E-64  | 0.33353791 | 0.41  | 0.121 | 9.39E-60 | 27 | PTPRA    | Principal cells |
| 1.71E-61  | 0.33349959 | 0.359 | 0.101 | 5.75E-57 | 27 | MED21    | Principal cells |
| 1.04E-51  | 0.33310752 | 0.549 | 0.216 | 3.51E-47 | 27 | JTB      | Principal cells |
| 5.79E-125 | 0.33288472 | 0.263 | 0.035 | #####    | 27 | EHD2     | Principal cells |
| 4.82E-52  | 0.33241133 | 0.506 | 0.189 | 1.63E-47 | 27 | TAF7     | Principal cells |
| 1.53E-54  | 0.33207436 | 0.542 | 0.206 | 5.17E-50 | 27 | TERF2IP  | Principal cells |

|           |            |       |       |          |    |          |                 |
|-----------|------------|-------|-------|----------|----|----------|-----------------|
| 7.37E-47  | 0.33100911 | 0.658 | 0.292 | 2.48E-42 | 27 | C19orf43 | Principal cells |
| 8.51E-47  | 0.33074641 | 0.478 | 0.185 | 2.87E-42 | 27 | MGST2    | Principal cells |
| 6.02E-39  | 0.3302439  | 0.494 | 0.208 | 2.03E-34 | 27 | CNQ1OT1  | Principal cells |
| 2.11E-59  | 0.33021905 | 0.372 | 0.11  | 7.11E-55 | 27 | SMC3     | Principal cells |
| 2.42E-34  | 0.32984518 | 0.856 | 0.477 | 8.14E-30 | 27 | SOD1     | Principal cells |
| 1.27E-85  | 0.32854855 | 0.273 | 0.051 | 4.27E-81 | 27 | ASAP1    | Principal cells |
| 8.77E-54  | 0.32803383 | 0.423 | 0.141 | 2.96E-49 | 27 | ZFHX3    | Principal cells |
| 1.85E-51  | 0.32793918 | 0.478 | 0.176 | 6.24E-47 | 27 | FNBP1L   | Principal cells |
| 2.40E-62  | 0.32754187 | 0.385 | 0.112 | 8.09E-58 | 27 | KRCC1    | Principal cells |
| 7.45E-80  | 0.32713514 | 0.251 | 0.046 | 2.51E-75 | 27 | FAM98A   | Principal cells |
| 3.47E-57  | 0.32712317 | 0.37  | 0.111 | 1.17E-52 | 27 | PPHLN1   | Principal cells |
| 5.06E-70  | 0.32700991 | 0.316 | 0.075 | 1.71E-65 | 27 | MAP4K4   | Principal cells |
| 6.90E-61  | 0.32585207 | 0.299 | 0.075 | 2.32E-56 | 27 | TULP4    | Principal cells |
| 6.17E-56  | 0.3254545  | 0.443 | 0.147 | 2.08E-51 | 27 | LMO4     | Principal cells |
| 4.12E-57  | 0.32533595 | 0.466 | 0.16  | 1.39E-52 | 27 | CCPG1    | Principal cells |
| 3.18E-73  | 0.32529566 | 0.284 | 0.061 | 1.07E-68 | 27 | SGCE     | Principal cells |
| 2.22E-51  | 0.32515918 | 0.537 | 0.208 | 7.49E-47 | 27 | POLR2F   | Principal cells |
| 7.61E-64  | 0.32502373 | 0.322 | 0.082 | 2.56E-59 | 27 | UBA2     | Principal cells |
| 1.81E-78  | 0.32436909 | 0.273 | 0.054 | 6.08E-74 | 27 | FBXW7    | Principal cells |
| 9.92E-81  | 0.32426247 | 0.278 | 0.054 | 3.34E-76 | 27 | TMEM64   | Principal cells |
| 5.01E-41  | 0.32340873 | 0.676 | 0.318 | 1.69E-36 | 27 | SARAF    | Principal cells |
| 2.38E-63  | 0.32313285 | 0.375 | 0.106 | 8.02E-59 | 27 | MBNL2    | Principal cells |
| 1.11E-84  | 0.32236712 | 0.263 | 0.048 | 3.75E-80 | 27 | ASSF8-AS | Principal cells |
| 7.97E-51  | 0.32166733 | 0.466 | 0.169 | 2.68E-46 | 27 | KPNB1    | Principal cells |
| 1.97E-59  | 0.32160089 | 0.501 | 0.173 | 6.62E-55 | 27 | SMARCA2  | Principal cells |
| 3.17E-55  | 0.32156705 | 0.344 | 0.101 | 1.07E-50 | 27 | MPRIP    | Principal cells |
| 7.77E-47  | 0.32115064 | 0.595 | 0.253 | 2.62E-42 | 27 | CSNK1A1  | Principal cells |
| 5.14E-59  | 0.32055865 | 0.289 | 0.072 | 1.73E-54 | 27 | EEA1     | Principal cells |
| 9.59E-48  | 0.3203915  | 0.478 | 0.183 | 3.23E-43 | 27 | EAPP     | Principal cells |
| 2.42E-52  | 0.32031219 | 0.641 | 0.259 | 8.17E-48 | 27 | NR2F2    | Principal cells |
| 2.62E-48  | 0.32012879 | 0.342 | 0.109 | 8.82E-44 | 27 | ITGB1BP1 | Principal cells |
| 8.23E-88  | 0.32010055 | 0.271 | 0.049 | 2.77E-83 | 27 | INC01089 | Principal cells |
| 2.25E-59  | 0.32006887 | 0.433 | 0.138 | 7.59E-55 | 27 | OSBPL8   | Principal cells |
| 7.29E-54  | 0.31916925 | 0.494 | 0.179 | 2.46E-49 | 27 | SH3GLB1  | Principal cells |
| 1.01E-109 | 0.31873841 | 0.256 | 0.037 | #####    | 27 | NOSTRIN  | Principal cells |
| 5.34E-74  | 0.31857234 | 0.261 | 0.052 | 1.80E-69 | 27 | CBX7     | Principal cells |
| 1.92E-51  | 0.31836238 | 0.38  | 0.123 | 6.46E-47 | 27 | MED13L   | Principal cells |
| 2.73E-65  | 0.31795746 | 0.352 | 0.094 | 9.20E-61 | 27 | ZNF704   | Principal cells |
| 8.16E-30  | 0.31794192 | 0.914 | 0.53  | 2.75E-25 | 27 | APP      | Principal cells |
| 6.95E-69  | 0.31747508 | 0.334 | 0.083 | 2.34E-64 | 27 | PRKCA    | Principal cells |
| 1.35E-45  | 0.31746364 | 0.456 | 0.174 | 4.55E-41 | 27 | MRPS18C  | Principal cells |
| 2.56E-39  | 0.31665954 | 0.61  | 0.279 | 8.62E-35 | 27 | SF3B6    | Principal cells |
| 2.64E-39  | 0.31614571 | 0.549 | 0.24  | 8.89E-35 | 27 | ESD      | Principal cells |
| 1.26E-48  | 0.31573878 | 0.691 | 0.304 | 4.25E-44 | 27 | SYF2     | Principal cells |
| 2.80E-37  | 0.31559755 | 0.663 | 0.324 | 9.43E-33 | 27 | ARPC2    | Principal cells |
| 3.26E-56  | 0.31525376 | 0.451 | 0.152 | 1.10E-51 | 27 | ELF1     | Principal cells |
| 1.74E-49  | 0.3151734  | 0.547 | 0.215 | 5.85E-45 | 27 | HCFC1R1  | Principal cells |
| 3.87E-39  | 0.31509676 | 0.575 | 0.261 | 1.30E-34 | 27 | SRSF9    | Principal cells |

|           |            |       |       |          |    |          |                 |
|-----------|------------|-------|-------|----------|----|----------|-----------------|
| 1.32E-59  | 0.31505623 | 0.357 | 0.101 | 4.46E-55 | 27 | KIAA0355 | Principal cells |
| 3.66E-57  | 0.31500531 | 0.443 | 0.141 | 1.23E-52 | 27 | AKAP12   | Principal cells |
| 1.67E-46  | 0.31462522 | 0.605 | 0.259 | 5.62E-42 | 27 | PSMA4    | Principal cells |
| 6.31E-65  | 0.31457962 | 0.273 | 0.062 | 2.13E-60 | 27 | LATS2    | Principal cells |
| 1.63E-41  | 0.31426334 | 0.795 | 0.399 | 5.51E-37 | 27 | CANX     | Principal cells |
| 1.84E-47  | 0.31395763 | 0.294 | 0.086 | 6.19E-43 | 27 | IGF1R    | Principal cells |
| 1.22E-49  | 0.31371624 | 0.316 | 0.093 | 4.10E-45 | 27 | UBE2J1   | Principal cells |
| 1.56E-47  | 0.3135614  | 0.311 | 0.095 | 5.25E-43 | 27 | MLXIP    | Principal cells |
| 1.21E-62  | 0.31349307 | 0.309 | 0.079 | 4.06E-58 | 27 | TMEM109  | Principal cells |
| 2.34E-42  | 0.31337759 | 0.428 | 0.165 | 7.89E-38 | 27 | COMT     | Principal cells |
| 3.57E-53  | 0.3132792  | 0.463 | 0.164 | 1.20E-48 | 27 | UPF3A    | Principal cells |
| 1.42E-82  | 0.31322565 | 0.367 | 0.086 | 4.80E-78 | 27 | CCSER2   | Principal cells |
| 6.99E-60  | 0.31283814 | 0.365 | 0.105 | 2.36E-55 | 27 | CRBN     | Principal cells |
| 1.15E-51  | 0.31184597 | 0.354 | 0.11  | 3.86E-47 | 27 | RNF115   | Principal cells |
| 1.73E-56  | 0.31151076 | 0.4   | 0.125 | 5.83E-52 | 27 | PON2     | Principal cells |
| 1.59E-56  | 0.31136111 | 0.322 | 0.089 | 5.35E-52 | 27 | FBXO25   | Principal cells |
| 1.30E-120 | 0.31087429 | 0.261 | 0.036 | #####    | 27 | CTNNBIP1 | Principal cells |
| 4.85E-40  | 0.31085667 | 0.835 | 0.426 | 1.64E-35 | 27 | YWHAZ    | Principal cells |
| 2.39E-38  | 0.31058514 | 0.835 | 0.438 | 8.04E-34 | 27 | HNRNPK   | Principal cells |
| 3.41E-44  | 0.31052166 | 0.608 | 0.267 | 1.15E-39 | 27 | SNRPB2   | Principal cells |
| 7.89E-61  | 0.31028679 | 0.286 | 0.071 | 2.66E-56 | 27 | NMRK1    | Principal cells |
| 5.95E-51  | 0.31019526 | 0.339 | 0.104 | 2.00E-46 | 27 | FAM127B  | Principal cells |
| 5.23E-38  | 0.31014768 | 0.463 | 0.196 | 1.76E-33 | 27 | UBXN1    | Principal cells |
| 1.38E-57  | 0.31006228 | 0.258 | 0.062 | 4.65E-53 | 27 | ZC3H7B   | Principal cells |
| 3.89E-46  | 0.30966185 | 0.458 | 0.167 | 1.31E-41 | 27 | ID3      | Principal cells |
| 1.42E-75  | 0.30966101 | 0.258 | 0.051 | 4.78E-71 | 27 | CHST12   | Principal cells |
| 1.27E-51  | 0.30959192 | 0.458 | 0.163 | 4.27E-47 | 27 | TMEM9B   | Principal cells |
| 2.17E-27  | 0.30949914 | 0.965 | 0.722 | 7.32E-23 | 27 | FAU      | Principal cells |
| 2.65E-60  | 0.30932345 | 0.258 | 0.059 | 8.93E-56 | 27 | EPB41L2  | Principal cells |
| 1.66E-54  | 0.30929815 | 0.557 | 0.213 | 5.60E-50 | 27 | RNF181   | Principal cells |
| 4.12E-58  | 0.30922228 | 0.532 | 0.192 | 1.39E-53 | 27 | RPN1     | Principal cells |
| 7.40E-52  | 0.3089658  | 0.281 | 0.076 | 2.49E-47 | 27 | MAML2    | Principal cells |
| 6.52E-50  | 0.3087257  | 0.387 | 0.126 | 2.20E-45 | 27 | COL4A1   | Principal cells |
| 1.28E-51  | 0.30869678 | 0.709 | 0.303 | 4.31E-47 | 27 | HERPUD1  | Principal cells |
| 1.49E-52  | 0.30863334 | 0.466 | 0.165 | 5.01E-48 | 27 | FAM63B   | Principal cells |
| 3.02E-40  | 0.30825902 | 0.785 | 0.39  | 1.02E-35 | 27 | SPCS2    | Principal cells |
| 1.06E-58  | 0.30808283 | 0.41  | 0.128 | 3.58E-54 | 27 | ARL2BP   | Principal cells |
| 7.25E-62  | 0.30803813 | 0.311 | 0.08  | 2.44E-57 | 27 | RHOQ     | Principal cells |
| 1.01E-47  | 0.30791989 | 0.6   | 0.249 | 3.40E-43 | 27 | DDX24    | Principal cells |
| 1.63E-31  | 0.30777848 | 0.944 | 0.6   | 5.49E-27 | 27 | COX6C    | Principal cells |
| 1.11E-71  | 0.30754043 | 0.316 | 0.074 | 3.75E-67 | 27 | PHF10    | Principal cells |
| 2.04E-62  | 0.30741436 | 0.319 | 0.082 | 6.87E-58 | 27 | PIGK     | Principal cells |
| 1.15E-52  | 0.30666752 | 0.403 | 0.132 | 3.87E-48 | 27 | UNC50    | Principal cells |
| 1.68E-64  | 0.30626441 | 0.322 | 0.081 | 5.67E-60 | 27 | OSTF1    | Principal cells |
| 3.98E-39  | 0.30625543 | 0.456 | 0.187 | 1.34E-34 | 27 | STUB1    | Principal cells |
| 7.13E-43  | 0.30586861 | 0.397 | 0.146 | 2.40E-38 | 27 | C7orf55  | Principal cells |
| 1.64E-61  | 0.30555724 | 0.463 | 0.146 | 5.53E-57 | 27 | TFPI     | Principal cells |
| 6.44E-38  | 0.30543911 | 0.59  | 0.272 | 2.17E-33 | 27 | RAB1A    | Principal cells |

|           |            |       |       |          |    |         |                 |
|-----------|------------|-------|-------|----------|----|---------|-----------------|
| 5.07E-49  | 0.30524714 | 0.352 | 0.112 | 1.71E-44 | 27 | TRAPPC4 | Principal cells |
| 2.75E-38  | 0.30380893 | 0.813 | 0.428 | 9.27E-34 | 27 | DYNC1I2 | Principal cells |
| 6.04E-75  | 0.30377289 | 0.286 | 0.06  | 2.03E-70 | 27 | APOL6   | Principal cells |
| 1.34E-52  | 0.30368855 | 0.491 | 0.179 | 4.51E-48 | 27 | ARHGAP5 | Principal cells |
| 6.99E-49  | 0.30262201 | 0.418 | 0.146 | 2.36E-44 | 27 | MEM106  | Principal cells |
| 2.90E-51  | 0.30257028 | 0.62  | 0.254 | 9.76E-47 | 27 | NMT1    | Principal cells |
| 2.30E-46  | 0.30208296 | 0.372 | 0.126 | 7.74E-42 | 27 | CCDC115 | Principal cells |
| 4.29E-49  | 0.30160818 | 0.339 | 0.105 | 1.45E-44 | 27 | UBE2R2  | Principal cells |
| 1.52E-55  | 0.3014198  | 0.466 | 0.159 | 5.11E-51 | 27 | CTBP1   | Principal cells |
| 6.05E-57  | 0.30104949 | 0.347 | 0.1   | 2.04E-52 | 27 | CLDND1  | Principal cells |
| 1.23E-41  | 0.30035798 | 0.732 | 0.35  | 4.13E-37 | 27 | WDR83OS | Principal cells |
| 6.12E-42  | 0.30031795 | 0.625 | 0.275 | 2.06E-37 | 27 | AIF1L   | Principal cells |
| 1.72E-49  | 0.30031138 | 0.266 | 0.071 | 5.81E-45 | 27 | UBE2Q1  | Principal cells |
| 3.02E-52  | 0.30029174 | 0.319 | 0.092 | 1.02E-47 | 27 | TPRKB   | Principal cells |
| 5.78E-39  | 0.2997094  | 0.62  | 0.284 | 1.95E-34 | 27 | H2AFZ   | Principal cells |
| 1.02E-47  | 0.29957142 | 0.435 | 0.158 | 3.44E-43 | 27 | CHD4    | Principal cells |
| 2.20E-51  | 0.29944771 | 0.42  | 0.142 | 7.42E-47 | 27 | PLEKHA5 | Principal cells |
| 5.09E-43  | 0.29930224 | 0.405 | 0.15  | 1.71E-38 | 27 | PSMB2   | Principal cells |
| 1.26E-49  | 0.29926195 | 0.324 | 0.099 | 4.24E-45 | 27 | HSBP1L1 | Principal cells |
| 1.45E-108 | 0.29876189 | 0.271 | 0.041 | #####    | 27 | ANKS1A  | Principal cells |
| 6.60E-52  | 0.29807617 | 0.365 | 0.115 | 2.22E-47 | 27 | MAN1A2  | Principal cells |
| 5.09E-51  | 0.29801498 | 0.514 | 0.195 | 1.72E-46 | 27 | PCNP    | Principal cells |
| 3.23E-46  | 0.29780142 | 0.481 | 0.186 | 1.09E-41 | 27 | ALKBH7  | Principal cells |
| 6.82E-52  | 0.29745526 | 0.385 | 0.125 | 2.30E-47 | 27 | ZFYVE21 | Principal cells |
| 1.98E-43  | 0.2971937  | 0.608 | 0.265 | 6.66E-39 | 27 | MTDH    | Principal cells |
| 8.24E-49  | 0.29718576 | 0.473 | 0.177 | 2.78E-44 | 27 | RAB18   | Principal cells |
| 1.89E-61  | 0.29695988 | 0.266 | 0.061 | 6.38E-57 | 27 | CPNE8   | Principal cells |
| 2.51E-60  | 0.29620294 | 0.334 | 0.09  | 8.45E-56 | 27 | PAN3    | Principal cells |
| 9.55E-39  | 0.29556253 | 0.577 | 0.261 | 3.22E-34 | 27 | KRT10   | Principal cells |
| 3.08E-40  | 0.29520086 | 0.749 | 0.361 | 1.04E-35 | 27 | TMCO1   | Principal cells |
| 6.01E-41  | 0.29485195 | 0.805 | 0.394 | 2.03E-36 | 27 | HNRNPC  | Principal cells |
| 8.46E-43  | 0.29461968 | 0.451 | 0.175 | 2.85E-38 | 27 | ASH1L   | Principal cells |
| 1.23E-58  | 0.29425017 | 0.291 | 0.074 | 4.13E-54 | 27 | CASC3   | Principal cells |
| 3.35E-42  | 0.29410249 | 0.408 | 0.149 | 1.13E-37 | 27 | TACC1   | Principal cells |
| 2.62E-56  | 0.29401048 | 0.344 | 0.099 | 8.83E-52 | 27 | PLEKHA3 | Principal cells |
| 7.96E-39  | 0.29393471 | 0.605 | 0.276 | 2.68E-34 | 27 | TUBA1B  | Principal cells |
| 1.86E-49  | 0.29388316 | 0.349 | 0.11  | 6.26E-45 | 27 | CHD3    | Principal cells |
| 3.99E-52  | 0.29380437 | 0.61  | 0.242 | 1.34E-47 | 27 | PFN2    | Principal cells |
| 1.05E-77  | 0.29375206 | 0.276 | 0.055 | 3.53E-73 | 27 | OGFRL1  | Principal cells |
| 1.15E-47  | 0.29375062 | 0.397 | 0.137 | 3.89E-43 | 27 | CUX1    | Principal cells |
| 7.41E-44  | 0.29367153 | 0.608 | 0.265 | 2.50E-39 | 27 | EIF5    | Principal cells |
| 1.39E-71  | 0.29357004 | 0.301 | 0.067 | 4.70E-67 | 27 | RAB31   | Principal cells |
| 7.55E-69  | 0.29349865 | 0.276 | 0.059 | 2.54E-64 | 27 | CALCRL  | Principal cells |
| 1.70E-58  | 0.29347403 | 0.453 | 0.148 | 5.74E-54 | 27 | YAP1    | Principal cells |
| 1.81E-47  | 0.29289543 | 0.676 | 0.297 | 6.11E-43 | 27 | ARPP19  | Principal cells |
| 6.20E-43  | 0.29281199 | 0.332 | 0.111 | 2.09E-38 | 27 | STRA13  | Principal cells |
| 1.89E-48  | 0.29280948 | 0.539 | 0.214 | 6.36E-44 | 27 | PSMA1   | Principal cells |
| 3.96E-44  | 0.29271417 | 0.415 | 0.152 | 1.33E-39 | 27 | USP16   | Principal cells |

|           |            |       |       |          |    |          |                 |
|-----------|------------|-------|-------|----------|----|----------|-----------------|
| 4.43E-41  | 0.2923846  | 0.587 | 0.259 | 1.49E-36 | 27 | TRAPPC1  | Principal cells |
| 3.58E-58  | 0.29225731 | 0.352 | 0.101 | 1.21E-53 | 27 | BAZ2A    | Principal cells |
| 9.00E-49  | 0.29216778 | 0.428 | 0.152 | 3.03E-44 | 27 | C16orf13 | Principal cells |
| 8.35E-40  | 0.29212756 | 0.428 | 0.169 | 2.81E-35 | 27 | MAGED2   | Principal cells |
| 1.76E-54  | 0.29164583 | 0.266 | 0.067 | 5.92E-50 | 27 | CNN2     | Principal cells |
| 1.12E-47  | 0.2912873  | 0.443 | 0.16  | 3.79E-43 | 27 | CREBRF   | Principal cells |
| 1.15E-53  | 0.29125322 | 0.261 | 0.065 | 3.86E-49 | 27 | ZNF532   | Principal cells |
| 1.01E-25  | 0.29114603 | 0.911 | 0.558 | 3.40E-21 | 27 | LAPTM4A  | Principal cells |
| 3.27E-53  | 0.29094802 | 0.476 | 0.169 | 1.10E-48 | 27 | ZC3H11A  | Principal cells |
| 7.36E-41  | 0.29079454 | 0.506 | 0.211 | 2.48E-36 | 27 | Mar-19   | Principal cells |
| 1.46E-53  | 0.29072014 | 0.327 | 0.094 | 4.93E-49 | 27 | MRFAP1L1 | Principal cells |
| 8.96E-76  | 0.29047681 | 0.268 | 0.053 | 3.02E-71 | 27 | GPRC5A   | Principal cells |
| 1.97E-53  | 0.29046998 | 0.304 | 0.084 | 6.63E-49 | 27 | RNF146   | Principal cells |
| 1.04E-63  | 0.29040197 | 0.291 | 0.069 | 3.52E-59 | 27 | ZNF462   | Principal cells |
| 8.61E-103 | 0.28962403 | 0.603 | 0.164 | 2.90E-98 | 27 | HLA-DPB1 | Principal cells |
| 3.76E-26  | 0.28955548 | 0.846 | 0.493 | 1.27E-21 | 27 | TMEM59   | Principal cells |
| 1.27E-48  | 0.28924583 | 0.478 | 0.177 | 4.28E-44 | 27 | ZRANB2   | Principal cells |
| 8.32E-27  | 0.28923156 | 0.967 | 0.635 | 2.80E-22 | 27 | TXNIP    | Principal cells |
| 4.03E-41  | 0.28872259 | 0.471 | 0.191 | 1.36E-36 | 27 | PSMB7    | Principal cells |
| 1.24E-50  | 0.28845796 | 0.339 | 0.104 | 4.18E-46 | 27 | CCNL2    | Principal cells |
| 2.37E-35  | 0.28844756 | 0.699 | 0.35  | 8.00E-31 | 27 | LAMTOR4  | Principal cells |
| 1.91E-42  | 0.2883981  | 0.276 | 0.082 | 6.43E-38 | 27 | EFEMP1   | Principal cells |
| 6.51E-38  | 0.28814566 | 0.448 | 0.186 | 2.19E-33 | 27 | CSNK2B   | Principal cells |
| 5.18E-46  | 0.28771209 | 0.423 | 0.153 | 1.75E-41 | 27 | FXR1     | Principal cells |
| 2.09E-40  | 0.28766442 | 0.684 | 0.319 | 7.04E-36 | 27 | EIF1AX   | Principal cells |
| 1.25E-42  | 0.28764291 | 0.684 | 0.314 | 4.21E-38 | 27 | SEPW1    | Principal cells |
| 5.93E-55  | 0.28751923 | 0.377 | 0.117 | 2.00E-50 | 27 | NUCB2    | Principal cells |
| 3.61E-45  | 0.2873767  | 0.42  | 0.154 | 1.22E-40 | 27 | GNB1     | Principal cells |
| 7.88E-36  | 0.28723625 | 0.777 | 0.396 | 2.65E-31 | 27 | HNRNPDL  | Principal cells |
| 2.38E-51  | 0.28700124 | 0.289 | 0.079 | 8.01E-47 | 27 | RPRD1A   | Principal cells |
| 3.71E-44  | 0.28659    | 0.413 | 0.148 | 1.25E-39 | 27 | IFI6     | Principal cells |
| 2.55E-46  | 0.28644672 | 0.42  | 0.152 | 8.60E-42 | 27 | ZCRB1    | Principal cells |
| 4.44E-41  | 0.28598995 | 0.511 | 0.215 | 1.49E-36 | 27 | PGAM1    | Principal cells |
| 7.90E-47  | 0.28565579 | 0.39  | 0.133 | 2.66E-42 | 27 | MAPK1    | Principal cells |
| 1.99E-49  | 0.2855174  | 0.453 | 0.163 | 6.70E-45 | 27 | PAK2     | Principal cells |
| 3.95E-35  | 0.28520129 | 0.646 | 0.317 | 1.33E-30 | 27 | GNG5     | Principal cells |
| 1.80E-45  | 0.28517249 | 0.463 | 0.178 | 6.08E-41 | 27 | CTSL     | Principal cells |
| 1.84E-64  | 0.28471743 | 0.433 | 0.125 | 6.20E-60 | 27 | AQP1     | Principal cells |
| 3.99E-46  | 0.28461515 | 0.491 | 0.191 | 1.34E-41 | 27 | PCM1     | Principal cells |
| 1.97E-46  | 0.28424053 | 0.392 | 0.136 | 6.63E-42 | 27 | SLC25A37 | Principal cells |
| 1.13E-48  | 0.28418425 | 0.316 | 0.095 | 3.82E-44 | 27 | C11orf73 | Principal cells |
| 4.62E-45  | 0.28397378 | 0.415 | 0.151 | 1.56E-40 | 27 | DNAJC3   | Principal cells |
| 9.44E-48  | 0.28386504 | 0.403 | 0.138 | 3.18E-43 | 27 | TPD52    | Principal cells |
| 3.16E-57  | 0.28378071 | 0.329 | 0.091 | 1.06E-52 | 27 | CCNY     | Principal cells |
| 1.15E-44  | 0.28325919 | 0.501 | 0.199 | 3.89E-40 | 27 | ATP6V1E1 | Principal cells |
| 2.52E-42  | 0.28306755 | 0.456 | 0.178 | 8.50E-38 | 27 | PSMC3    | Principal cells |
| 2.13E-46  | 0.28284327 | 0.405 | 0.142 | 7.17E-42 | 27 | VPS13C   | Principal cells |
| 3.96E-35  | 0.28249707 | 0.342 | 0.128 | 1.33E-30 | 27 | AK1      | Principal cells |

|          |            |       |       |          |    |          |                 |
|----------|------------|-------|-------|----------|----|----------|-----------------|
| 1.18E-38 | 0.28237106 | 0.78  | 0.393 | 3.98E-34 | 27 | DAZAP2   | Principal cells |
| 2.74E-45 | 0.28233122 | 0.554 | 0.228 | 9.24E-41 | 27 | NSRP1    | Principal cells |
| 1.06E-32 | 0.28226768 | 0.706 | 0.361 | 3.56E-28 | 27 | NDUFC2   | Principal cells |
| 2.43E-37 | 0.28226624 | 0.387 | 0.151 | 8.17E-33 | 27 | POLR2G   | Principal cells |
| 2.41E-40 | 0.28211854 | 0.57  | 0.251 | 8.11E-36 | 27 | KRTCAP2  | Principal cells |
| 1.47E-45 | 0.28210171 | 0.471 | 0.18  | 4.96E-41 | 27 | ARF3     | Principal cells |
| 2.80E-51 | 0.28182907 | 0.448 | 0.155 | 9.45E-47 | 27 | CGNL1    | Principal cells |
| 1.48E-39 | 0.28151738 | 0.365 | 0.135 | 5.00E-35 | 27 | EMC4     | Principal cells |
| 6.12E-47 | 0.28139853 | 0.451 | 0.166 | 2.06E-42 | 27 | LSM14A   | Principal cells |
| 1.41E-36 | 0.28087234 | 0.41  | 0.165 | 4.77E-32 | 27 | PSMA3    | Principal cells |
| 7.10E-51 | 0.28082033 | 0.322 | 0.094 | 2.39E-46 | 27 | STARD3NL | Principal cells |
| 7.85E-39 | 0.28066601 | 0.57  | 0.254 | 2.65E-34 | 27 | SF3B5    | Principal cells |
| 6.08E-78 | 0.28017293 | 0.266 | 0.051 | 2.05E-73 | 27 | MAPRE2   | Principal cells |
| 3.79E-46 | 0.27980313 | 0.392 | 0.136 | 1.28E-41 | 27 | TUG1     | Principal cells |
| 8.02E-45 | 0.27928374 | 0.567 | 0.237 | 2.70E-40 | 27 | IQGAP1   | Principal cells |
| 6.56E-40 | 0.27913355 | 0.491 | 0.205 | 2.21E-35 | 27 | ATRAID   | Principal cells |
| 8.58E-45 | 0.27896324 | 0.562 | 0.235 | 2.89E-40 | 27 | ATRX     | Principal cells |
| 1.94E-48 | 0.27895573 | 0.397 | 0.136 | 6.53E-44 | 27 | PKIG     | Principal cells |
| 5.69E-45 | 0.27877066 | 0.651 | 0.288 | 1.92E-40 | 27 | VIMP     | Principal cells |
| 2.68E-52 | 0.27850944 | 0.375 | 0.118 | 9.04E-48 | 27 | VEZT     | Principal cells |
| 4.27E-83 | 0.27842514 | 0.273 | 0.052 | 1.44E-78 | 27 | SORBS3   | Principal cells |
| 7.64E-47 | 0.27831627 | 0.562 | 0.229 | 2.58E-42 | 27 | PYURF    | Principal cells |
| 1.32E-29 | 0.27819346 | 0.992 | 0.861 | 4.44E-25 | 27 | RPS28    | Principal cells |
| 1.70E-50 | 0.27734863 | 0.352 | 0.109 | 5.72E-46 | 27 | SPPL3    | Principal cells |
| 3.20E-53 | 0.27713984 | 0.273 | 0.071 | 1.08E-48 | 27 | MBOAT2   | Principal cells |
| 1.20E-59 | 0.27692889 | 0.251 | 0.056 | 4.05E-55 | 27 | TP53INP1 | Principal cells |
| 1.70E-56 | 0.27683844 | 0.471 | 0.158 | 5.73E-52 | 27 | FLNA     | Principal cells |
| 7.67E-41 | 0.27650601 | 0.415 | 0.159 | 2.58E-36 | 27 | CDC37    | Principal cells |
| 4.25E-44 | 0.27607341 | 0.549 | 0.226 | 1.43E-39 | 27 | TMEM50B  | Principal cells |
| 9.08E-46 | 0.27553554 | 0.453 | 0.169 | 3.06E-41 | 27 | PFDN4    | Principal cells |
| 1.02E-49 | 0.27529693 | 0.347 | 0.108 | 3.44E-45 | 27 | USP9X    | Principal cells |
| 2.16E-38 | 0.27520621 | 0.762 | 0.376 | 7.28E-34 | 27 | CBX3     | Principal cells |
| 2.17E-45 | 0.27508132 | 0.344 | 0.113 | 7.30E-41 | 27 | GANAB    | Principal cells |
| 4.79E-44 | 0.27500986 | 0.435 | 0.163 | 1.61E-39 | 27 | NCKAP1   | Principal cells |
| 4.86E-39 | 0.27452122 | 0.468 | 0.193 | 1.64E-34 | 27 | HNRNPH3  | Principal cells |
| 2.27E-42 | 0.2739566  | 0.595 | 0.257 | 7.64E-38 | 27 | CD46     | Principal cells |
| 5.52E-40 | 0.27391105 | 0.461 | 0.187 | 1.86E-35 | 27 | AP2M1    | Principal cells |
| 1.81E-33 | 0.27390796 | 0.549 | 0.255 | 6.11E-29 | 27 | COX14    | Principal cells |
| 6.25E-47 | 0.27386264 | 0.461 | 0.17  | 2.11E-42 | 27 | IDS      | Principal cells |
| 1.12E-46 | 0.2736111  | 0.714 | 0.318 | 3.76E-42 | 27 | PRKAR1A  | Principal cells |
| 1.29E-40 | 0.2735612  | 0.441 | 0.173 | 4.35E-36 | 27 | TAPBP    | Principal cells |
| 5.20E-42 | 0.2733093  | 0.392 | 0.143 | 1.75E-37 | 27 | FAM204A  | Principal cells |
| 4.98E-43 | 0.27284644 | 0.458 | 0.178 | 1.68E-38 | 27 | RAB14    | Principal cells |
| 1.71E-38 | 0.27274979 | 0.501 | 0.214 | 5.77E-34 | 27 | XRCC5    | Principal cells |
| 3.85E-41 | 0.27230966 | 0.41  | 0.155 | 1.30E-36 | 27 | RAB11B   | Principal cells |
| 9.52E-46 | 0.2723045  | 0.365 | 0.123 | 3.21E-41 | 27 | CHTOP    | Principal cells |
| 3.44E-43 | 0.27220973 | 0.468 | 0.182 | 1.16E-38 | 27 | FAM200B  | Principal cells |
| 7.95E-47 | 0.2717438  | 0.284 | 0.082 | 2.68E-42 | 27 | BLVRA    | Principal cells |

|           |            |       |       |          |    |          |                 |
|-----------|------------|-------|-------|----------|----|----------|-----------------|
| 2.57E-45  | 0.270903   | 0.403 | 0.142 | 8.65E-41 | 27 | C8orf33  | Principal cells |
| 1.38E-96  | 0.27081577 | 0.58  | 0.158 | 4.66E-92 | 27 | HLA-DPA1 | Principal cells |
| 3.18E-36  | 0.27060627 | 0.392 | 0.155 | 1.07E-31 | 27 | UBE2E3   | Principal cells |
| 4.01E-48  | 0.27053125 | 0.278 | 0.077 | 1.35E-43 | 27 | CREB1    | Principal cells |
| 1.53E-39  | 0.27038431 | 0.281 | 0.09  | 5.15E-35 | 27 | SNAPIN   | Principal cells |
| 7.61E-48  | 0.2700909  | 0.468 | 0.173 | 2.56E-43 | 27 | DHX36    | Principal cells |
| 2.38E-45  | 0.26975999 | 0.392 | 0.137 | 8.01E-41 | 27 | TMEM248  | Principal cells |
| 4.75E-44  | 0.26914065 | 0.539 | 0.219 | 1.60E-39 | 27 | USP53    | Principal cells |
| 8.51E-49  | 0.26906784 | 0.278 | 0.077 | 2.87E-44 | 27 | SH3RF1   | Principal cells |
| 2.55E-56  | 0.26897479 | 0.281 | 0.071 | 8.59E-52 | 27 | QPRT     | Principal cells |
| 5.52E-41  | 0.26889453 | 0.418 | 0.16  | 1.86E-36 | 27 | PDCD6    | Principal cells |
| 1.82E-40  | 0.26871182 | 0.603 | 0.267 | 6.12E-36 | 27 | PTTG1IP  | Principal cells |
| 1.53E-48  | 0.2686354  | 0.441 | 0.156 | 5.16E-44 | 27 | RAB5B    | Principal cells |
| 6.34E-62  | 0.26839605 | 0.329 | 0.085 | 2.13E-57 | 27 | ISG15    | Principal cells |
| 2.59E-51  | 0.26796808 | 0.392 | 0.127 | 8.73E-47 | 27 | ARID1A   | Principal cells |
| 1.86E-42  | 0.26772649 | 0.332 | 0.111 | 6.28E-38 | 27 | CDC26    | Principal cells |
| 8.25E-49  | 0.26735818 | 0.299 | 0.086 | 2.78E-44 | 27 | SBF2     | Principal cells |
| 8.90E-47  | 0.26690969 | 0.582 | 0.24  | 3.00E-42 | 27 | TM9SF2   | Principal cells |
| 1.55E-38  | 0.26667849 | 0.418 | 0.164 | 5.22E-34 | 27 | RBM17    | Principal cells |
| 7.47E-48  | 0.26644319 | 0.276 | 0.077 | 2.52E-43 | 27 | ZHX1     | Principal cells |
| 1.49E-59  | 0.26638205 | 0.273 | 0.065 | 5.02E-55 | 27 | SLF2     | Principal cells |
| 2.79E-36  | 0.26622605 | 0.291 | 0.098 | 9.39E-32 | 27 | GYPC     | Principal cells |
| 2.49E-27  | 0.26597828 | 0.972 | 0.688 | 8.40E-23 | 27 | SRP14    | Principal cells |
| 6.37E-40  | 0.26590484 | 0.481 | 0.195 | 2.15E-35 | 27 | WWTR1    | Principal cells |
| 5.89E-44  | 0.26584553 | 0.311 | 0.098 | 1.99E-39 | 27 | KIF22    | Principal cells |
| 4.60E-51  | 0.26584543 | 0.456 | 0.16  | 1.55E-46 | 27 | MAT2B    | Principal cells |
| 4.75E-44  | 0.26572164 | 0.334 | 0.108 | 1.60E-39 | 27 | TNKS2    | Principal cells |
| 1.74E-47  | 0.26551053 | 0.387 | 0.131 | 5.86E-43 | 27 | ADD1     | Principal cells |
| 1.48E-102 | 0.26495019 | 0.278 | 0.044 | 5.00E-98 | 27 | CARD16   | Principal cells |
| 3.32E-33  | 0.26486047 | 0.367 | 0.147 | 1.12E-28 | 27 | PIN1     | Principal cells |
| 1.08E-50  | 0.26483286 | 0.352 | 0.11  | 3.64E-46 | 27 | APOPT1   | Principal cells |
| 1.28E-43  | 0.26473277 | 0.527 | 0.215 | 4.31E-39 | 27 | SRSF10   | Principal cells |
| 7.50E-40  | 0.26467753 | 0.37  | 0.135 | 2.53E-35 | 27 | ERBB2IP  | Principal cells |
| 9.40E-42  | 0.26456301 | 0.372 | 0.131 | 3.17E-37 | 27 | CBX6     | Principal cells |
| 2.30E-50  | 0.26455364 | 0.347 | 0.104 | 7.76E-46 | 27 | IFI16    | Principal cells |
| 6.30E-38  | 0.2645449  | 0.387 | 0.149 | 2.12E-33 | 27 | RAD23A   | Principal cells |
| 1.52E-38  | 0.26454489 | 0.542 | 0.238 | 5.13E-34 | 27 | TCEB1    | Principal cells |
| 1.15E-23  | 0.26414597 | 0.906 | 0.553 | 3.86E-19 | 27 | PFDN5    | Principal cells |
| 9.02E-47  | 0.26387105 | 0.552 | 0.222 | 3.04E-42 | 27 | MEAF6    | Principal cells |
| 4.61E-54  | 0.26376126 | 0.271 | 0.069 | 1.55E-49 | 27 | SKA2     | Principal cells |
| 5.09E-26  | 0.26367844 | 0.828 | 0.46  | 1.72E-21 | 27 | CHCHD2   | Principal cells |
| 1.34E-43  | 0.26362591 | 0.549 | 0.227 | 4.52E-39 | 27 | CELF1    | Principal cells |
| 1.81E-41  | 0.26352643 | 0.377 | 0.136 | 6.10E-37 | 27 | SEC63    | Principal cells |
| 4.95E-35  | 0.2634885  | 0.542 | 0.245 | 1.67E-30 | 27 | TMEM14C  | Principal cells |
| 5.72E-35  | 0.2634541  | 0.661 | 0.316 | 1.93E-30 | 27 | SUMO1    | Principal cells |
| 3.80E-42  | 0.26328707 | 0.496 | 0.202 | 1.28E-37 | 27 | HNRNPR   | Principal cells |
| 1.46E-39  | 0.26312631 | 0.547 | 0.235 | 4.91E-35 | 27 | TUBB     | Principal cells |
| 5.18E-59  | 0.26270238 | 0.286 | 0.07  | 1.74E-54 | 27 | SLC9A3R1 | Principal cells |

|          |            |       |       |          |    |          |                 |
|----------|------------|-------|-------|----------|----|----------|-----------------|
| 1.62E-36 | 0.26266536 | 0.62  | 0.289 | 5.46E-32 | 27 | NENF     | Principal cells |
| 3.63E-54 | 0.26265954 | 0.286 | 0.075 | 1.22E-49 | 27 | Sep-19   | Principal cells |
| 7.13E-39 | 0.26181891 | 0.506 | 0.215 | 2.40E-34 | 27 | KMT2E    | Principal cells |
| 4.84E-38 | 0.26180046 | 0.451 | 0.184 | 1.63E-33 | 27 | YY1      | Principal cells |
| 2.58E-49 | 0.26175511 | 0.299 | 0.086 | 8.69E-45 | 27 | RBFOX2   | Principal cells |
| 6.56E-53 | 0.26155442 | 0.253 | 0.063 | 2.21E-48 | 27 | EPHX1    | Principal cells |
| 1.01E-50 | 0.26152625 | 0.266 | 0.07  | 3.40E-46 | 27 | KLC1     | Principal cells |
| 4.10E-40 | 0.26094905 | 0.281 | 0.088 | 1.38E-35 | 27 | POLR3GL  | Principal cells |
| 1.09E-54 | 0.26058146 | 0.324 | 0.091 | 3.69E-50 | 27 | AKAP11   | Principal cells |
| 2.93E-39 | 0.2603932  | 0.542 | 0.232 | 9.89E-35 | 27 | SFT2D1   | Principal cells |
| 7.67E-46 | 0.2602272  | 0.405 | 0.142 | 2.58E-41 | 27 | TNS1     | Principal cells |
| 1.03E-42 | 0.25991848 | 0.582 | 0.251 | 3.49E-38 | 27 | LAMP1    | Principal cells |
| 5.89E-48 | 0.25978442 | 0.446 | 0.161 | 1.99E-43 | 27 | BORCS7   | Principal cells |
| 1.25E-42 | 0.25963706 | 0.349 | 0.12  | 4.21E-38 | 27 | DCTN6    | Principal cells |
| 3.07E-56 | 0.25941855 | 0.278 | 0.07  | 1.03E-51 | 27 | 11-382A2 | Principal cells |
| 5.33E-55 | 0.2590022  | 0.278 | 0.072 | 1.79E-50 | 27 | FBXO17   | Principal cells |
| 3.11E-48 | 0.25890165 | 0.332 | 0.101 | 1.05E-43 | 27 | RAPGEF3  | Principal cells |
| 3.75E-50 | 0.25868294 | 0.473 | 0.172 | 1.26E-45 | 27 | SNRNP27  | Principal cells |
| 3.40E-40 | 0.25805122 | 0.668 | 0.307 | 1.15E-35 | 27 | SH3BGR13 | Principal cells |
| 7.77E-31 | 0.2580263  | 0.681 | 0.347 | 2.62E-26 | 27 | GUK1     | Principal cells |
| 6.11E-47 | 0.25800229 | 0.499 | 0.192 | 2.06E-42 | 27 | VPS35    | Principal cells |
| 5.39E-68 | 0.25790555 | 0.271 | 0.058 | 1.82E-63 | 27 | POLR2M   | Principal cells |
| 1.84E-34 | 0.25752047 | 0.676 | 0.324 | 6.20E-30 | 27 | ISCU     | Principal cells |
| 2.33E-39 | 0.25740832 | 0.304 | 0.101 | 7.85E-35 | 27 | VAMP3    | Principal cells |
| 4.10E-42 | 0.25724849 | 0.387 | 0.139 | 1.38E-37 | 27 | CRTAP    | Principal cells |
| 5.42E-43 | 0.25617644 | 0.266 | 0.078 | 1.83E-38 | 27 | LAMA5    | Principal cells |
| 7.06E-49 | 0.25616789 | 0.273 | 0.075 | 2.38E-44 | 27 | SSBP4    | Principal cells |
| 6.22E-36 | 0.2552746  | 0.359 | 0.136 | 2.10E-31 | 27 | CIR1     | Principal cells |
| 1.31E-40 | 0.25511981 | 0.59  | 0.26  | 4.41E-36 | 27 | UBE2B    | Principal cells |
| 2.26E-41 | 0.25506194 | 0.547 | 0.229 | 7.60E-37 | 27 | MSN      | Principal cells |
| 2.56E-39 | 0.25504666 | 0.299 | 0.098 | 8.63E-35 | 27 | SIL1     | Principal cells |
| 8.51E-43 | 0.25499197 | 0.306 | 0.096 | 2.87E-38 | 27 | SP1      | Principal cells |
| 1.71E-37 | 0.25456061 | 0.544 | 0.237 | 5.75E-33 | 27 | C6orf48  | Principal cells |
| 4.31E-29 | 0.25452706 | 0.676 | 0.355 | 1.45E-24 | 27 | SNRPG    | Principal cells |
| 1.04E-36 | 0.25428706 | 0.615 | 0.284 | 3.49E-32 | 27 | MORF4L2  | Principal cells |
| 2.24E-38 | 0.25397202 | 0.256 | 0.078 | 7.55E-34 | 27 | USP1     | Principal cells |
| 6.22E-42 | 0.25391996 | 0.311 | 0.1   | 2.09E-37 | 27 | ABI1     | Principal cells |
| 2.92E-22 | 0.25370411 | 0.929 | 0.591 | 9.83E-18 | 27 | RPL30    | Principal cells |
| 6.01E-37 | 0.25347764 | 0.319 | 0.112 | 2.02E-32 | 27 | TM2D3    | Principal cells |
| 2.77E-67 | 0.25314793 | 0.942 | 0.452 | 9.33E-63 | 27 | ADIRF    | Principal cells |
| 6.18E-40 | 0.25270387 | 0.486 | 0.2   | 2.08E-35 | 27 | H2AFV    | Principal cells |
| 5.80E-35 | 0.25256111 | 0.253 | 0.081 | 1.95E-30 | 27 | IGF2R    | Principal cells |
| 2.47E-44 | 0.25250889 | 0.251 | 0.069 | 8.31E-40 | 27 | RIMKLB   | Principal cells |
| 1.74E-37 | 0.25245936 | 0.299 | 0.101 | 5.85E-33 | 27 | TXNDC12  | Principal cells |
| 2.62E-38 | 0.2523333  | 0.392 | 0.149 | 8.82E-34 | 27 | NPTN     | Principal cells |
| 2.70E-57 | 0.25197552 | 0.266 | 0.063 | 9.09E-53 | 27 | TRIM22   | Principal cells |
| 5.56E-43 | 0.25194618 | 0.43  | 0.162 | 1.88E-38 | 27 | GINM1    | Principal cells |
| 2.42E-38 | 0.25164519 | 0.337 | 0.118 | 8.14E-34 | 27 | PUM2     | Principal cells |

|           |            |       |       |          |    |         |                            |
|-----------|------------|-------|-------|----------|----|---------|----------------------------|
| 2.27E-55  | 0.25161235 | 0.311 | 0.085 | 7.65E-51 | 27 | TMEM128 | Principal cells            |
| 5.15E-38  | 0.25152233 | 0.443 | 0.179 | 1.73E-33 | 27 | SAR1A   | Principal cells            |
| 7.06E-48  | 0.2509512  | 0.524 | 0.203 | 2.38E-43 | 27 | CTNNA1  | Principal cells            |
| 5.05E-34  | 0.25052824 | 0.499 | 0.222 | 1.70E-29 | 27 | CFLAR   | Principal cells            |
| 1.69E-28  | 0.25047714 | 0.676 | 0.35  | 5.70E-24 | 27 | SPCS1   | Principal cells            |
| 7.76E-36  | 0.25039326 | 0.587 | 0.27  | 2.62E-31 | 27 | YWHAQ   | Principal cells            |
| 1.98E-183 | 3.0171163  | 0.27  | 0.027 | #####    | 28 | CFD     | Immune-Macrophage/monocyte |
| 0         | 2.87128195 | 0.898 | 0.18  | 0        | 28 | MGP     | Immune-Macrophage/monocyte |
| 0         | 2.75094767 | 0.661 | 0.033 | 0        | 28 | DCN     | Immune-Macrophage/monocyte |
| 1.96E-182 | 2.65532352 | 0.404 | 0.06  | #####    | 28 | CCDC80  | Immune-Macrophage/monocyte |
| 1.37E-211 | 2.44936984 | 0.798 | 0.242 | #####    | 28 | TIMP1   | Immune-Macrophage/monocyte |
| 0         | 2.42538046 | 0.656 | 0.024 | 0        | 28 | COL3A1  | Immune-Macrophage/monocyte |
| 0         | 2.36971518 | 0.449 | 0.004 | 0        | 28 | LUM     | Immune-Macrophage/monocyte |
| 0         | 2.27573132 | 0.698 | 0.034 | 0        | 28 | COL1A2  | Immune-Macrophage/monocyte |
| 2.71E-183 | 1.94818914 | 0.255 | 0.024 | #####    | 28 | APOD    | Immune-Macrophage/monocyte |
| 1.53E-162 | 1.90966285 | 0.806 | 0.309 | #####    | 28 | LGALS1  | Immune-Macrophage/monocyte |
| 0         | 1.89442722 | 0.564 | 0.021 | 0        | 28 | COL1A1  | Immune-Macrophage/monocyte |
| 7.97E-75  | 1.87064909 | 0.43  | 0.129 | 2.69E-70 | 28 | IGFBP6  | Immune-Macrophage/monocyte |
| 5.24E-281 | 1.77339919 | 0.472 | 0.053 | #####    | 28 | FN1     | Immune-Macrophage/monocyte |
| 4.73E-248 | 1.72411634 | 0.635 | 0.108 | #####    | 28 | TAGLN   | Immune-Macrophage/monocyte |
| 2.08E-158 | 1.67055734 | 0.661 | 0.185 | #####    | 28 | SPARC   | Immune-Macrophage/monocyte |
| 5.48E-212 | 1.65161592 | 0.517 | 0.085 | #####    | 28 | BGN     | Immune-Macrophage/monocyte |
| 4.35E-172 | 1.61799507 | 0.774 | 0.245 | #####    | 28 | CALD1   | Immune-Macrophage/monocyte |
| 1.02E-179 | 1.61595802 | 0.438 | 0.068 | #####    | 28 | ACTA2   | Immune-Macrophage/monocyte |
| 4.98E-168 | 1.54810673 | 0.451 | 0.078 | #####    | 28 | FSTL1   | Immune-Macrophage/monocyte |
| 0         | 1.5259913  | 0.423 | 0.035 | 0        | 28 | HOPX    | Immune-Macrophage/monocyte |
| 0         | 1.4354484  | 0.467 | 0.047 | 0        | 28 | COL6A2  | Immune-Macrophage/monocyte |
| 2.88E-50  | 1.42257757 | 0.32  | 0.101 | 9.70E-46 | 28 | RGS5    | Immune-Macrophage/monocyte |
| 3.58E-194 | 1.40832733 | 0.325 | 0.036 | #####    | 28 | C1R     | Immune-Macrophage/monocyte |
| 3.31E-143 | 1.40287951 | 0.58  | 0.142 | #####    | 28 | CTGF    | Immune-Macrophage/monocyte |
| 5.46E-224 | 1.39304429 | 0.388 | 0.044 | #####    | 28 | PLAC9   | Immune-Macrophage/monocyte |
| 1.89E-85  | 1.38237169 | 0.588 | 0.215 | 6.38E-81 | 28 | GSN     | Immune-Macrophage/monocyte |
| 0         | 1.32547292 | 0.294 | 0.012 | 0        | 28 | C7      | Immune-Macrophage/monocyte |
| 3.57E-180 | 1.27301712 | 0.344 | 0.043 | #####    | 28 | CPE     | Immune-Macrophage/monocyte |
| 2.23E-114 | 1.26451806 | 0.759 | 0.303 | #####    | 28 | VIM     | Immune-Macrophage/monocyte |
| 1.09E-196 | 1.25460369 | 0.336 | 0.038 | #####    | 28 | C1S     | Immune-Macrophage/monocyte |
| 3.30E-163 | 1.24581978 | 0.512 | 0.098 | #####    | 28 | TPM2    | Immune-Macrophage/monocyte |
| 1.24E-231 | 1.19439714 | 0.367 | 0.039 | #####    | 28 | AEBP1   | Immune-Macrophage/monocyte |
| 2.47E-275 | 1.19362452 | 0.299 | 0.022 | #####    | 28 | PCOLCE  | Immune-Macrophage/monocyte |
| 0         | 1.19129637 | 0.304 | 0.01  | 0        | 28 | COL6A3  | Immune-Macrophage/monocyte |
| 1.13E-98  | 1.15973107 | 0.462 | 0.125 | 3.81E-94 | 28 | COL4A1  | Immune-Macrophage/monocyte |
| 6.71E-163 | 1.12039138 | 0.375 | 0.055 | #####    | 28 | NR2F1   | Immune-Macrophage/monocyte |
| 1.60E-91  | 1.11726754 | 0.543 | 0.174 | 5.40E-87 | 28 | MYL9    | Immune-Macrophage/monocyte |
| 1.19E-128 | 1.03177406 | 0.323 | 0.05  | #####    | 28 | LHFP    | Immune-Macrophage/monocyte |
| 1.66E-75  | 1.00532572 | 0.438 | 0.129 | 5.59E-71 | 28 | TIMP2   | Immune-Macrophage/monocyte |
| 8.87E-83  | 1.00474626 | 0.362 | 0.087 | 2.99E-78 | 28 | CYP1B1  | Immune-Macrophage/monocyte |
| 3.57E-182 | 0.98142202 | 0.383 | 0.051 | #####    | 28 | MAP1B   | Immune-Macrophage/monocyte |
| 2.75E-85  | 0.9786904  | 0.491 | 0.14  | 9.26E-81 | 28 | AKAP12  | Immune-Macrophage/monocyte |

|           |            |       |       |          |    |          |                            |
|-----------|------------|-------|-------|----------|----|----------|----------------------------|
| 1.74E-43  | 0.97552242 | 0.436 | 0.183 | 5.85E-39 | 28 | CYR61    | Immune-Macrophage/monocyte |
| 5.98E-42  | 0.9584381  | 0.798 | 0.706 | 2.01E-37 | 28 | IGFBP7   | Immune-Macrophage/monocyte |
| 1.85E-145 | 0.94440504 | 0.315 | 0.043 | #####    | 28 | PPP1R14A | Immune-Macrophage/monocyte |
| 6.96E-64  | 0.9296581  | 0.664 | 0.287 | 2.34E-59 | 28 | IGFBP5   | Immune-Macrophage/monocyte |
| 1.45E-67  | 0.90946934 | 0.291 | 0.068 | 4.89E-63 | 28 | THY1     | Immune-Macrophage/monocyte |
| 3.81E-75  | 0.90866732 | 0.412 | 0.121 | 1.28E-70 | 28 | COL4A2   | Immune-Macrophage/monocyte |
| 2.12E-47  | 0.85469547 | 0.449 | 0.177 | 7.14E-43 | 28 | MARCKS   | Immune-Macrophage/monocyte |
| 5.72E-150 | 0.84409762 | 0.352 | 0.051 | #####    | 28 | MFGE8    | Immune-Macrophage/monocyte |
| 2.73E-126 | 0.84048638 | 0.344 | 0.057 | #####    | 28 | FILIP1L  | Immune-Macrophage/monocyte |
| 3.71E-65  | 0.83993826 | 0.386 | 0.115 | 1.25E-60 | 28 | PALLD    | Immune-Macrophage/monocyte |
| 8.60E-61  | 0.82809877 | 0.908 | 0.808 | 2.90E-56 | 28 | TMSB4X   | Immune-Macrophage/monocyte |
| 3.78E-88  | 0.82362099 | 0.417 | 0.103 | 1.27E-83 | 28 | A2M      | Immune-Macrophage/monocyte |
| 7.00E-35  | 0.81808045 | 0.388 | 0.168 | 2.36E-30 | 28 | ID3      | Immune-Macrophage/monocyte |
| 3.26E-32  | 0.81299926 | 0.801 | 0.643 | 1.10E-27 | 28 | MT2A     | Immune-Macrophage/monocyte |
| 1.18E-20  | 0.77619928 | 0.27  | 0.118 | 3.98E-16 | 28 | CCL2     | Immune-Macrophage/monocyte |
| 7.29E-151 | 0.77272629 | 0.312 | 0.041 | #####    | 28 | RBP1     | Immune-Macrophage/monocyte |
| 1.55E-56  | 0.76872638 | 0.404 | 0.138 | 5.23E-52 | 28 | CD99     | Immune-Macrophage/monocyte |
| 7.11E-36  | 0.75468901 | 0.619 | 0.382 | 2.39E-31 | 28 | ITGB1    | Immune-Macrophage/monocyte |
| 1.08E-44  | 0.73832638 | 0.727 | 0.458 | 3.64E-40 | 28 | IFITM3   | Immune-Macrophage/monocyte |
| 2.23E-60  | 0.73457889 | 0.661 | 0.3   | 7.52E-56 | 28 | TIMP3    | Immune-Macrophage/monocyte |
| 3.30E-31  | 0.73443414 | 0.522 | 0.301 | 1.11E-26 | 28 | Sep-19   | Immune-Macrophage/monocyte |
| 7.17E-60  | 0.72784594 | 0.352 | 0.102 | 2.42E-55 | 28 | PHLDA1   | Immune-Macrophage/monocyte |
| 3.84E-77  | 0.71498751 | 0.386 | 0.098 | 1.29E-72 | 28 | TCF4     | Immune-Macrophage/monocyte |
| 8.40E-40  | 0.70573105 | 0.449 | 0.198 | 2.83E-35 | 28 | TPM4     | Immune-Macrophage/monocyte |
| 1.01E-46  | 0.68603075 | 0.386 | 0.137 | 3.41E-42 | 28 | MYLK     | Immune-Macrophage/monocyte |
| 1.57E-51  | 0.67776662 | 0.446 | 0.161 | 5.30E-47 | 28 | NUPR1    | Immune-Macrophage/monocyte |
| 3.41E-92  | 0.67550776 | 0.341 | 0.072 | 1.15E-87 | 28 | ITGA1    | Immune-Macrophage/monocyte |
| 4.16E-136 | 0.67394888 | 0.265 | 0.032 | #####    | 28 | FRZB     | Immune-Macrophage/monocyte |
| 1.28E-25  | 0.6692062  | 0.74  | 0.505 | 4.32E-21 | 28 | CST3     | Immune-Macrophage/monocyte |
| 1.21E-26  | 0.6443157  | 0.312 | 0.133 | 4.06E-22 | 28 | COL6A1   | Immune-Macrophage/monocyte |
| 1.33E-37  | 0.64072695 | 0.357 | 0.135 | 4.47E-33 | 28 | IGFBP2   | Immune-Macrophage/monocyte |
| 1.18E-22  | 0.63672965 | 0.276 | 0.119 | 3.96E-18 | 28 | C10orf10 | Immune-Macrophage/monocyte |
| 2.85E-99  | 0.63289579 | 0.255 | 0.039 | 9.59E-95 | 28 | PDGFRB   | Immune-Macrophage/monocyte |
| 2.42E-52  | 0.62295987 | 0.289 | 0.077 | 8.17E-48 | 28 | CAV1     | Immune-Macrophage/monocyte |
| 1.43E-26  | 0.61329089 | 0.362 | 0.169 | 4.82E-22 | 28 | TUBA1A   | Immune-Macrophage/monocyte |
| 1.40E-24  | 0.60637741 | 0.331 | 0.147 | 4.70E-20 | 28 | TFPI     | Immune-Macrophage/monocyte |
| 6.51E-41  | 0.59825521 | 0.318 | 0.108 | 2.19E-36 | 28 | ARHGDIB  | Immune-Macrophage/monocyte |
| 3.77E-14  | 0.59254757 | 0.378 | 0.224 | 1.27E-09 | 28 | SERPING1 | Immune-Macrophage/monocyte |
| 1.14E-58  | 0.58754604 | 0.289 | 0.074 | 3.83E-54 | 28 | PDLIM7   | Immune-Macrophage/monocyte |
| 1.42E-28  | 0.58747717 | 0.486 | 0.259 | 4.79E-24 | 28 | ANXA5    | Immune-Macrophage/monocyte |
| 3.91E-26  | 0.58659834 | 0.48  | 0.265 | 1.32E-21 | 28 | PPIB     | Immune-Macrophage/monocyte |
| 1.58E-39  | 0.57587864 | 0.315 | 0.109 | 5.31E-35 | 28 | PRKCDBP  | Immune-Macrophage/monocyte |
| 2.65E-52  | 0.57297949 | 0.921 | 0.861 | 8.94E-48 | 28 | RPL10    | Immune-Macrophage/monocyte |
| 1.55E-34  | 0.5717645  | 0.357 | 0.141 | 5.21E-30 | 28 | PTRF     | Immune-Macrophage/monocyte |
| 6.05E-41  | 0.56862098 | 0.315 | 0.103 | 2.04E-36 | 28 | IGFBP4   | Immune-Macrophage/monocyte |
| 3.02E-76  | 0.56562246 | 0.315 | 0.069 | 1.02E-71 | 28 | ENG      | Immune-Macrophage/monocyte |
| 7.54E-37  | 0.55563424 | 0.299 | 0.104 | 2.54E-32 | 28 | CCDC85B  | Immune-Macrophage/monocyte |
| 1.60E-36  | 0.55213521 | 0.255 | 0.078 | 5.38E-32 | 28 | HTRA1    | Immune-Macrophage/monocyte |

|          |            |       |       |          |    |          |                            |
|----------|------------|-------|-------|----------|----|----------|----------------------------|
| 4.18E-17 | 0.54870285 | 0.585 | 0.441 | 1.41E-12 | 28 | MYL12A   | Immune-Macrophage/monocyte |
| 2.20E-43 | 0.54502911 | 0.399 | 0.146 | 7.41E-39 | 28 | BST2     | Immune-Macrophage/monocyte |
| 8.21E-30 | 0.54459592 | 0.732 | 0.544 | 2.77E-25 | 28 | CD63     | Immune-Macrophage/monocyte |
| 1.10E-29 | 0.54191428 | 0.357 | 0.15  | 3.70E-25 | 28 | EMP3     | Immune-Macrophage/monocyte |
| 5.40E-73 | 0.53558617 | 0.283 | 0.058 | 1.82E-68 | 28 | C11orf96 | Immune-Macrophage/monocyte |
| 7.51E-11 | 0.53520216 | 0.331 | 0.206 | 2.53E-06 | 28 | GNG11    | Immune-Macrophage/monocyte |
| 9.78E-17 | 0.5340702  | 0.396 | 0.213 | 3.29E-12 | 28 | ANXA1    | Immune-Macrophage/monocyte |
| 1.46E-29 | 0.53018413 | 0.291 | 0.113 | 4.92E-25 | 28 | PRSS23   | Immune-Macrophage/monocyte |
| 9.94E-06 | 0.53009427 | 0.339 | 0.253 | 0.335    | 28 | S100A4   | Immune-Macrophage/monocyte |
| 1.19E-24 | 0.52225048 | 0.32  | 0.144 | 4.00E-20 | 28 | INC00152 | Immune-Macrophage/monocyte |
| 4.77E-38 | 0.51910338 | 0.339 | 0.118 | 1.61E-33 | 28 | NNMT     | Immune-Macrophage/monocyte |
| 7.24E-30 | 0.51486755 | 0.352 | 0.148 | 2.44E-25 | 28 | LMO4     | Immune-Macrophage/monocyte |
| 9.45E-18 | 0.51290978 | 0.43  | 0.247 | 3.18E-13 | 28 | ARID5B   | Immune-Macrophage/monocyte |
| 8.51E-27 | 0.51037823 | 0.32  | 0.136 | 2.87E-22 | 28 | SERPINH1 | Immune-Macrophage/monocyte |
| 3.97E-19 | 0.50884721 | 0.257 | 0.113 | 1.34E-14 | 28 | MYADM    | Immune-Macrophage/monocyte |
| 1.56E-28 | 0.50212241 | 0.365 | 0.159 | 5.27E-24 | 28 | FLNA     | Immune-Macrophage/monocyte |
| 2.32E-21 | 0.49474798 | 0.496 | 0.28  | 7.83E-17 | 28 | TSC22D3  | Immune-Macrophage/monocyte |
| 9.04E-20 | 0.49352525 | 0.457 | 0.267 | 3.05E-15 | 28 | TAGLN2   | Immune-Macrophage/monocyte |
| 8.20E-24 | 0.49331602 | 0.751 | 0.67  | 2.76E-19 | 28 | RPS2     | Immune-Macrophage/monocyte |
| 4.03E-22 | 0.48629641 | 0.84  | 0.809 | 1.36E-17 | 28 | ACTB     | Immune-Macrophage/monocyte |
| 6.37E-17 | 0.48547352 | 0.304 | 0.156 | 2.15E-12 | 28 | SDC2     | Immune-Macrophage/monocyte |
| 4.21E-14 | 0.48190215 | 0.304 | 0.165 | 1.42E-09 | 28 | NFIA     | Immune-Macrophage/monocyte |
| 4.27E-10 | 0.47657575 | 0.562 | 0.45  | 1.44E-05 | 28 | CALM1    | Immune-Macrophage/monocyte |
| 1.50E-14 | 0.47632735 | 0.352 | 0.196 | 5.05E-10 | 28 | THBS1    | Immune-Macrophage/monocyte |
| 3.68E-17 | 0.46847889 | 0.554 | 0.382 | 1.24E-12 | 28 | NAP1L1   | Immune-Macrophage/monocyte |
| 3.94E-24 | 0.46773166 | 0.349 | 0.16  | 1.33E-19 | 28 | SPRY1    | Immune-Macrophage/monocyte |
| 6.36E-08 | 0.46503785 | 0.294 | 0.188 | 0.00214  | 28 | RARRES2  | Immune-Macrophage/monocyte |
| 1.68E-14 | 0.45616509 | 0.47  | 0.31  | 5.65E-10 | 28 | IFITM2   | Immune-Macrophage/monocyte |
| 3.20E-12 | 0.44785813 | 0.423 | 0.277 | 1.08E-07 | 28 | TUBA1B   | Immune-Macrophage/monocyte |
| 3.28E-28 | 0.44433243 | 0.273 | 0.103 | 1.10E-23 | 28 | PDLIM1   | Immune-Macrophage/monocyte |
| 5.31E-18 | 0.43787669 | 0.48  | 0.288 | 1.79E-13 | 28 | C12orf57 | Immune-Macrophage/monocyte |
| 1.80E-12 | 0.43330581 | 0.307 | 0.176 | 6.06E-08 | 28 | Sep-19   | Immune-Macrophage/monocyte |
| 1.23E-21 | 0.43177142 | 0.302 | 0.133 | 4.16E-17 | 28 | TM4SF1   | Immune-Macrophage/monocyte |
| 9.83E-27 | 0.43088988 | 0.278 | 0.11  | 3.31E-22 | 28 | CALU     | Immune-Macrophage/monocyte |
| 9.98E-10 | 0.42995537 | 0.31  | 0.193 | 3.36E-05 | 28 | LGALS3BP | Immune-Macrophage/monocyte |
| 2.72E-25 | 0.42578499 | 0.32  | 0.136 | 9.16E-21 | 28 | UACA     | Immune-Macrophage/monocyte |
| 2.63E-13 | 0.42272752 | 0.289 | 0.152 | 8.88E-09 | 28 | DPYSL2   | Immune-Macrophage/monocyte |
| 4.67E-14 | 0.41988667 | 0.446 | 0.267 | 1.57E-09 | 28 | CRIP1    | Immune-Macrophage/monocyte |
| 1.08E-29 | 0.41537568 | 0.89  | 0.834 | 3.63E-25 | 28 | RPS8     | Immune-Macrophage/monocyte |
| 1.14E-15 | 0.40964301 | 0.43  | 0.261 | 3.84E-11 | 28 | NR2F2    | Immune-Macrophage/monocyte |
| 8.43E-14 | 0.40855343 | 0.286 | 0.149 | 2.84E-09 | 28 | LY6E     | Immune-Macrophage/monocyte |
| 2.70E-17 | 0.40584526 | 0.438 | 0.255 | 9.09E-13 | 28 | PTMS     | Immune-Macrophage/monocyte |
| 7.46E-32 | 0.40351552 | 0.291 | 0.106 | 2.51E-27 | 28 | ACTN1    | Immune-Macrophage/monocyte |
| 5.46E-14 | 0.3998147  | 0.386 | 0.233 | 1.84E-09 | 28 | RHOC     | Immune-Macrophage/monocyte |
| 1.39E-15 | 0.39546867 | 0.664 | 0.556 | 4.69E-11 | 28 | GNB2L1   | Immune-Macrophage/monocyte |
| 3.83E-27 | 0.39330787 | 0.906 | 0.864 | 1.29E-22 | 28 | RPL13A   | Immune-Macrophage/monocyte |
| 6.22E-22 | 0.39259505 | 0.793 | 0.726 | 2.10E-17 | 28 | RPL18A   | Immune-Macrophage/monocyte |
| 8.73E-19 | 0.39226918 | 0.391 | 0.212 | 2.94E-14 | 28 | MYH9     | Immune-Macrophage/monocyte |

|          |            |       |       |          |    |          |                            |
|----------|------------|-------|-------|----------|----|----------|----------------------------|
| 2.37E-13 | 0.39111934 | 0.57  | 0.423 | 7.98E-09 | 28 | EEF2     | Immune-Macrophage/monocyte |
| 2.37E-23 | 0.38994898 | 0.273 | 0.113 | 7.99E-19 | 28 | NRP1     | Immune-Macrophage/monocyte |
| 2.40E-14 | 0.38814511 | 0.349 | 0.195 | 8.09E-10 | 28 | CEBPB    | Immune-Macrophage/monocyte |
| 4.97E-16 | 0.38782154 | 0.732 | 0.627 | 1.67E-11 | 28 | RPS5     | Immune-Macrophage/monocyte |
| 6.52E-24 | 0.38508904 | 0.89  | 0.809 | 2.20E-19 | 28 | RPL12    | Immune-Macrophage/monocyte |
| 1.38E-30 | 0.38458111 | 0.289 | 0.104 | 4.66E-26 | 28 | IFI16    | Immune-Macrophage/monocyte |
| 2.12E-09 | 0.38241294 | 0.677 | 0.634 | 7.13E-05 | 28 | MYL6     | Immune-Macrophage/monocyte |
| 1.18E-25 | 0.38239113 | 0.903 | 0.881 | 3.97E-21 | 28 | RPS18    | Immune-Macrophage/monocyte |
| 4.05E-16 | 0.38189541 | 0.333 | 0.174 | 1.36E-11 | 28 | LIMA1    | Immune-Macrophage/monocyte |
| 7.40E-16 | 0.37460313 | 0.255 | 0.122 | 2.49E-11 | 28 | ILK      | Immune-Macrophage/monocyte |
| 2.72E-07 | 0.37302418 | 0.475 | 0.358 | 0.00917  | 28 | CEBPD    | Immune-Macrophage/monocyte |
| 6.31E-20 | 0.37165402 | 0.291 | 0.132 | 2.13E-15 | 28 | EPS8     | Immune-Macrophage/monocyte |
| 3.07E-14 | 0.37156208 | 0.551 | 0.37  | 1.03E-09 | 28 | TPM1     | Immune-Macrophage/monocyte |
| 6.15E-15 | 0.37084078 | 0.252 | 0.121 | 2.07E-10 | 28 | LAMB2    | Immune-Macrophage/monocyte |
| 3.13E-14 | 0.37077951 | 0.388 | 0.232 | 1.05E-09 | 28 | ARPC5    | Immune-Macrophage/monocyte |
| 1.53E-06 | 0.37063178 | 0.546 | 0.482 | 0.05147  | 28 | PFN1     | Immune-Macrophage/monocyte |
| 2.44E-26 | 0.36781958 | 0.911 | 0.87  | 8.22E-22 | 28 | RPLP1    | Immune-Macrophage/monocyte |
| 2.24E-14 | 0.36563002 | 0.394 | 0.236 | 7.53E-10 | 28 | SSR2     | Immune-Macrophage/monocyte |
| 3.46E-13 | 0.36390939 | 0.333 | 0.182 | 1.17E-08 | 28 | KLF2     | Immune-Macrophage/monocyte |
| 6.87E-17 | 0.36292902 | 0.307 | 0.15  | 2.32E-12 | 28 | TACC1    | Immune-Macrophage/monocyte |
| 5.56E-41 | 0.35897736 | 0.273 | 0.08  | 1.87E-36 | 28 | ZEB2     | Immune-Macrophage/monocyte |
| 9.32E-20 | 0.35793726 | 0.325 | 0.152 | 3.14E-15 | 28 | CLIC4    | Immune-Macrophage/monocyte |
| 4.14E-27 | 0.3569069  | 0.9   | 0.872 | 1.39E-22 | 28 | RPL13    | Immune-Macrophage/monocyte |
| 4.53E-25 | 0.35680639 | 0.892 | 0.869 | 1.52E-20 | 28 | RPL32    | Immune-Macrophage/monocyte |
| 4.37E-19 | 0.35466444 | 0.85  | 0.771 | 1.47E-14 | 28 | FTL      | Immune-Macrophage/monocyte |
| 1.19E-08 | 0.35359471 | 0.328 | 0.211 | 0.0004   | 28 | RBMS1    | Immune-Macrophage/monocyte |
| 1.96E-13 | 0.35295155 | 0.714 | 0.636 | 6.60E-09 | 28 | RPL10A   | Immune-Macrophage/monocyte |
| 6.53E-16 | 0.35171758 | 0.748 | 0.662 | 2.20E-11 | 28 | RPS3     | Immune-Macrophage/monocyte |
| 6.65E-21 | 0.35066364 | 0.853 | 0.765 | 2.24E-16 | 28 | RPL35A   | Immune-Macrophage/monocyte |
| 1.57E-16 | 0.35030595 | 0.438 | 0.251 | 5.30E-12 | 28 | COX7A1   | Immune-Macrophage/monocyte |
| 6.70E-07 | 0.34833012 | 0.541 | 0.47  | 0.02258  | 28 | CFL1     | Immune-Macrophage/monocyte |
| 1.85E-09 | 0.34296498 | 0.727 | 0.667 | 6.24E-05 | 28 | HSPB1    | Immune-Macrophage/monocyte |
| 1.05E-17 | 0.34277466 | 0.27  | 0.127 | 3.53E-13 | 28 | TINAGL1  | Immune-Macrophage/monocyte |
| 3.25E-08 | 0.34173556 | 0.391 | 0.271 | 0.0011   | 28 | YWHAQ    | Immune-Macrophage/monocyte |
| 1.31E-11 | 0.34112086 | 0.638 | 0.49  | 4.42E-07 | 28 | RPLP0    | Immune-Macrophage/monocyte |
| 2.31E-12 | 0.34111645 | 0.698 | 0.616 | 7.79E-08 | 28 | RPL5     | Immune-Macrophage/monocyte |
| 7.04E-10 | 0.33950081 | 0.58  | 0.451 | 2.37E-05 | 28 | BTF3     | Immune-Macrophage/monocyte |
| 8.77E-13 | 0.33410205 | 0.719 | 0.592 | 2.96E-08 | 28 | RPL30    | Immune-Macrophage/monocyte |
| 3.46E-13 | 0.33404256 | 0.903 | 0.893 | 1.17E-08 | 28 | B2M      | Immune-Macrophage/monocyte |
| 1.25E-10 | 0.33323926 | 0.47  | 0.331 | 4.21E-06 | 28 | EIF3E    | Immune-Macrophage/monocyte |
| 1.21E-12 | 0.32959819 | 0.252 | 0.131 | 4.09E-08 | 28 | MARCKSL1 | Immune-Macrophage/monocyte |
| 1.31E-20 | 0.32773827 | 0.85  | 0.788 | 4.42E-16 | 28 | RPS15A   | Immune-Macrophage/monocyte |
| 2.84E-11 | 0.32733441 | 0.667 | 0.538 | 9.57E-07 | 28 | RPS27L   | Immune-Macrophage/monocyte |
| 1.91E-07 | 0.32353735 | 0.289 | 0.187 | 0.00644  | 28 | DST      | Immune-Macrophage/monocyte |
| 4.22E-10 | 0.32113102 | 0.291 | 0.172 | 1.42E-05 | 28 | ANKRD10  | Immune-Macrophage/monocyte |
| 1.14E-16 | 0.31973197 | 0.278 | 0.134 | 3.83E-12 | 28 | AP3S1    | Immune-Macrophage/monocyte |
| 7.32E-09 | 0.31706002 | 0.388 | 0.264 | 0.00025  | 28 | ARF4     | Immune-Macrophage/monocyte |
| 2.45E-11 | 0.31480194 | 0.711 | 0.627 | 8.24E-07 | 28 | RPL29    | Immune-Macrophage/monocyte |

|           |            |       |       |          |    |          |                            |
|-----------|------------|-------|-------|----------|----|----------|----------------------------|
| 9.63E-09  | 0.31374132 | 0.381 | 0.252 | 0.00032  | 28 | CD151    | Immune-Macrophage/monocyte |
| 7.65E-09  | 0.31123923 | 0.638 | 0.545 | 0.00026  | 28 | EEF1D    | Immune-Macrophage/monocyte |
| 1.03E-09  | 0.3105094  | 0.328 | 0.201 | 3.47E-05 | 28 | SSR3     | Immune-Macrophage/monocyte |
| 9.03E-10  | 0.30859209 | 0.31  | 0.189 | 3.04E-05 | 28 | C19orf60 | Immune-Macrophage/monocyte |
| 4.69E-08  | 0.3079373  | 0.491 | 0.369 | 0.00158  | 28 | CNN3     | Immune-Macrophage/monocyte |
| 3.50E-13  | 0.30789592 | 0.819 | 0.8   | 1.18E-08 | 28 | TMSB10   | Immune-Macrophage/monocyte |
| 9.90E-10  | 0.30773284 | 0.457 | 0.31  | 3.34E-05 | 28 | SELM     | Immune-Macrophage/monocyte |
| 2.25E-07  | 0.30715475 | 0.307 | 0.198 | 0.00759  | 28 | KLF9     | Immune-Macrophage/monocyte |
| 0.0003318 | 0.30690453 | 0.423 | 0.338 | 1        | 28 | SEPP1    | Immune-Macrophage/monocyte |
| 2.72E-12  | 0.30334354 | 0.738 | 0.646 | 9.17E-08 | 28 | RPS16    | Immune-Macrophage/monocyte |
| 2.03E-12  | 0.30153378 | 0.753 | 0.714 | 6.84E-08 | 28 | RPL15    | Immune-Macrophage/monocyte |
| 9.48E-13  | 0.29822343 | 0.782 | 0.758 | 3.20E-08 | 28 | RPL3     | Immune-Macrophage/monocyte |
| 5.71E-23  | 0.29748451 | 0.26  | 0.103 | 1.93E-18 | 28 | LBH      | Immune-Macrophage/monocyte |
| 1.11E-09  | 0.29409554 | 0.283 | 0.172 | 3.75E-05 | 28 | PSMD8    | Immune-Macrophage/monocyte |
| 6.05E-08  | 0.29408017 | 0.436 | 0.306 | 0.00204  | 28 | SPTBN1   | Immune-Macrophage/monocyte |
| 4.21E-19  | 0.29347758 | 0.268 | 0.114 | 1.42E-14 | 28 | SPARCL1  | Immune-Macrophage/monocyte |
| 5.74E-10  | 0.29214797 | 0.698 | 0.634 | 1.93E-05 | 28 | RPL18    | Immune-Macrophage/monocyte |
| 2.19E-11  | 0.2916402  | 0.517 | 0.35  | 7.36E-07 | 28 | TCEAL4   | Immune-Macrophage/monocyte |
| 1.47E-13  | 0.29133756 | 0.785 | 0.732 | 4.94E-09 | 28 | RPS4X    | Immune-Macrophage/monocyte |
| 3.03E-13  | 0.29115308 | 0.777 | 0.722 | 1.02E-08 | 28 | RPL27A   | Immune-Macrophage/monocyte |
| 1.40E-22  | 0.29080773 | 0.312 | 0.134 | 4.72E-18 | 28 | VAMP5    | Immune-Macrophage/monocyte |
| 7.97E-20  | 0.29076533 | 0.879 | 0.802 | 2.69E-15 | 28 | RPL11    | Immune-Macrophage/monocyte |
| 7.93E-08  | 0.29053836 | 0.501 | 0.384 | 0.00267  | 28 | EID1     | Immune-Macrophage/monocyte |
| 1.28E-07  | 0.28978682 | 0.349 | 0.237 | 0.0043   | 28 | TUBB     | Immune-Macrophage/monocyte |
| 2.07E-09  | 0.28773992 | 0.407 | 0.276 | 6.96E-05 | 28 | CRIP2    | Immune-Macrophage/monocyte |
| 3.89E-15  | 0.28735373 | 0.278 | 0.139 | 1.31E-10 | 28 | VCL      | Immune-Macrophage/monocyte |
| 1.07E-17  | 0.28705762 | 0.861 | 0.791 | 3.61E-13 | 28 | RPL23A   | Immune-Macrophage/monocyte |
| 1.18E-06  | 0.28645943 | 0.336 | 0.231 | 0.0398   | 28 | LPP      | Immune-Macrophage/monocyte |
| 4.01E-13  | 0.28469153 | 0.255 | 0.128 | 1.35E-08 | 28 | UTRN     | Immune-Macrophage/monocyte |
| 4.03E-10  | 0.2845436  | 0.436 | 0.291 | 1.36E-05 | 28 | RABAC1   | Immune-Macrophage/monocyte |
| 6.32E-10  | 0.28412982 | 0.323 | 0.199 | 2.13E-05 | 28 | OSTC     | Immune-Macrophage/monocyte |
| 3.15E-05  | 0.28359942 | 0.331 | 0.236 | 1        | 28 | DDX18    | Immune-Macrophage/monocyte |
| 8.61E-16  | 0.28157218 | 0.265 | 0.124 | 2.90E-11 | 28 | MEF2C    | Immune-Macrophage/monocyte |
| 3.29E-10  | 0.28120563 | 0.748 | 0.645 | 1.11E-05 | 28 | ACTG1    | Immune-Macrophage/monocyte |
| 5.87E-22  | 0.28015002 | 0.979 | 0.943 | 1.98E-17 | 28 | RPS27    | Immune-Macrophage/monocyte |
| 0.00115   | 0.28005481 | 0.572 | 0.558 | 1        | 28 | GAPDH    | Immune-Macrophage/monocyte |
| 1.36E-07  | 0.27729679 | 0.428 | 0.309 | 0.00458  | 28 | SH3BGR1  | Immune-Macrophage/monocyte |
| 9.71E-09  | 0.27603747 | 0.42  | 0.286 | 0.00033  | 28 | MORF4L2  | Immune-Macrophage/monocyte |
| 4.32E-07  | 0.27521355 | 0.273 | 0.175 | 0.01455  | 28 | DDAH2    | Immune-Macrophage/monocyte |
| 7.15E-12  | 0.27346197 | 0.391 | 0.239 | 2.41E-07 | 28 | RSL24D1  | Immune-Macrophage/monocyte |
| 1.94E-12  | 0.27153771 | 0.772 | 0.733 | 6.52E-08 | 28 | RPL19    | Immune-Macrophage/monocyte |
| 3.06E-07  | 0.26906162 | 0.436 | 0.324 | 0.01031  | 28 | FKBP1A   | Immune-Macrophage/monocyte |
| 4.08E-10  | 0.26862735 | 0.717 | 0.671 | 1.38E-05 | 28 | RPS9     | Immune-Macrophage/monocyte |
| 2.34E-09  | 0.26720266 | 0.386 | 0.253 | 7.90E-05 | 28 | RBM3     | Immune-Macrophage/monocyte |
| 2.32E-14  | 0.26524765 | 0.853 | 0.831 | 7.81E-10 | 28 | RPS12    | Immune-Macrophage/monocyte |
| 4.25E-11  | 0.26398394 | 0.738 | 0.632 | 1.43E-06 | 28 | RPS11    | Immune-Macrophage/monocyte |
| 1.95E-10  | 0.26393768 | 0.294 | 0.171 | 6.58E-06 | 28 | PPIC     | Immune-Macrophage/monocyte |
| 7.52E-14  | 0.26392561 | 0.255 | 0.126 | 2.53E-09 | 28 | LIMS1    | Immune-Macrophage/monocyte |

|           |            |       |       |          |    |          |                            |
|-----------|------------|-------|-------|----------|----|----------|----------------------------|
| 1.02E-05  | 0.26297332 | 0.438 | 0.331 | 0.34362  | 28 | ANXA2    | Immune-Macrophage/monocyte |
| 1.02E-12  | 0.26255897 | 0.793 | 0.741 | 3.45E-08 | 28 | RPS3A    | Immune-Macrophage/monocyte |
| 1.52E-10  | 0.26255617 | 0.417 | 0.267 | 5.12E-06 | 28 | MTDH     | Immune-Macrophage/monocyte |
| 1.28E-06  | 0.26198422 | 0.404 | 0.29  | 0.04324  | 28 | VIMP     | Immune-Macrophage/monocyte |
| 5.18E-07  | 0.26069922 | 0.265 | 0.171 | 0.01746  | 28 | RNH1     | Immune-Macrophage/monocyte |
| 1.01E-06  | 0.26005725 | 0.43  | 0.326 | 0.03413  | 28 | ARPC2    | Immune-Macrophage/monocyte |
| 6.65E-06  | 0.25856971 | 0.346 | 0.25  | 0.22411  | 28 | Sep-19   | Immune-Macrophage/monocyte |
| 5.31E-08  | 0.25827594 | 0.604 | 0.465 | 0.00179  | 28 | WBP5     | Immune-Macrophage/monocyte |
| 3.30E-16  | 0.25737279 | 0.866 | 0.852 | 1.11E-11 | 28 | RPS15    | Immune-Macrophage/monocyte |
| 3.31E-08  | 0.25683213 | 0.31  | 0.198 | 0.00111  | 28 | REXO2    | Immune-Macrophage/monocyte |
| 0.0001562 | 0.25652479 | 0.504 | 0.398 | 1        | 28 | NPC2     | Immune-Macrophage/monocyte |
| 7.87E-11  | 0.25587264 | 0.782 | 0.713 | 2.65E-06 | 28 | RPS13    | Immune-Macrophage/monocyte |
| 7.22E-09  | 0.25585737 | 0.693 | 0.6   | 0.00024  | 28 | RPL27    | Immune-Macrophage/monocyte |
| 0.0010479 | 0.25523982 | 0.268 | 0.206 | 1        | 28 | ITGAV    | Immune-Macrophage/monocyte |
| 1.78E-08  | 0.25198847 | 0.724 | 0.646 | 0.0006   | 28 | DSTN     | Immune-Macrophage/monocyte |
| 2.38E-301 | 1.87024557 | 0.732 | 0.1   | #####    | 29 | SPINK1   | Immune-B cells             |
| 2.90E-208 | 1.86623004 | 0.564 | 0.087 | #####    | 29 | G0S2     | Immune-B cells             |
| 0         | 1.64935146 | 0.806 | 0.075 | 0        | 29 | ATP6V1G3 | Immune-B cells             |
| 0         | 1.46539028 | 0.723 | 0.081 | 0        | 29 | ATP6V0D2 | Immune-B cells             |
| 1.82E-202 | 1.40144443 | 0.78  | 0.173 | #####    | 29 | TMEM213  | Immune-B cells             |
| 7.89E-158 | 1.25154612 | 0.576 | 0.114 | #####    | 29 | TMEM101  | Immune-B cells             |
| 0         | 1.17765194 | 0.471 | 0.039 | 0        | 29 | FAM24B   | Immune-B cells             |
| 7.90E-201 | 1.15244456 | 0.573 | 0.086 | #####    | 29 | SLC26A7  | Immune-B cells             |
| 1.00E-94  | 1.1238444  | 0.599 | 0.179 | 3.37E-90 | 29 | DDIT3    | Immune-B cells             |
| 2.45E-106 | 1.12359004 | 0.471 | 0.106 | #####    | 29 | GADD45G  | Immune-B cells             |
| 0         | 1.12052397 | 0.506 | 0.045 | 0        | 29 | INC01187 | Immune-B cells             |
| 1.05E-98  | 1.07966178 | 0.793 | 0.317 | 3.55E-94 | 29 | C12orf75 | Immune-B cells             |
| 1.80E-176 | 1.06143853 | 0.481 | 0.072 | #####    | 29 | SMIM6    | Immune-B cells             |
| 2.94E-126 | 1.0174042  | 0.634 | 0.15  | #####    | 29 | ADGRF5   | Immune-B cells             |
| 1.36E-97  | 1.00134048 | 0.86  | 0.391 | 4.57E-93 | 29 | ATP6V0B  | Immune-B cells             |
| 1.50E-188 | 0.98155937 | 0.452 | 0.057 | #####    | 29 | SLC4A1   | Immune-B cells             |
| 7.07E-102 | 0.97138475 | 0.535 | 0.139 | 2.38E-97 | 29 | ARHGAP18 | Immune-B cells             |
| 2.22E-94  | 0.90890061 | 0.799 | 0.295 | 7.48E-90 | 29 | SMIM24   | Immune-B cells             |
| 5.04E-72  | 0.89398994 | 0.685 | 0.284 | 1.70E-67 | 29 | C090498. | Immune-B cells             |
| 5.90E-76  | 0.8712705  | 0.306 | 0.059 | 1.99E-71 | 29 | DUSP2    | Immune-B cells             |
| 1.21E-68  | 0.86308951 | 0.691 | 0.293 | 4.06E-64 | 29 | ATP6AP2  | Immune-B cells             |
| 1.08E-35  | 0.85238421 | 0.373 | 0.135 | 3.63E-31 | 29 | HSPA6    | Immune-B cells             |
| 6.21E-98  | 0.84845083 | 0.455 | 0.102 | 2.09E-93 | 29 | ADGRF1   | Immune-B cells             |
| 6.12E-127 | 0.84756988 | 0.446 | 0.076 | #####    | 29 | RHCG     | Immune-B cells             |
| 8.62E-100 | 0.82927215 | 0.503 | 0.118 | 2.91E-95 | 29 | ATP6V1B1 | Immune-B cells             |
| 6.34E-46  | 0.81713014 | 0.669 | 0.314 | 2.14E-41 | 29 | ATF3     | Immune-B cells             |
| 2.60E-57  | 0.81449854 | 0.599 | 0.25  | 8.76E-53 | 29 | LITAF    | Immune-B cells             |
| 2.78E-187 | 0.81193097 | 0.373 | 0.04  | #####    | 29 | DMRT2    | Immune-B cells             |
| 1.26E-59  | 0.81036121 | 0.713 | 0.314 | 4.25E-55 | 29 | CA12     | Immune-B cells             |
| 6.14E-190 | 0.80893514 | 0.389 | 0.043 | #####    | 29 | CLNK     | Immune-B cells             |
| 7.43E-80  | 0.79855742 | 0.678 | 0.233 | 2.50E-75 | 29 | APOE     | Immune-B cells             |
| 1.13E-65  | 0.77010543 | 0.943 | 0.6   | 3.82E-61 | 29 | JUN      | Immune-B cells             |
| 2.39E-105 | 0.76643433 | 0.389 | 0.071 | #####    | 29 | IL18     | Immune-B cells             |

|           |            |       |       |          |    |            |                |
|-----------|------------|-------|-------|----------|----|------------|----------------|
| 6.16E-124 | 0.7627183  | 0.341 | 0.048 | #####    | 29 | PART1      | Immune-B cells |
| 1.71E-58  | 0.761791   | 0.854 | 0.498 | 5.75E-54 | 29 | MIF        | Immune-B cells |
| 2.44E-147 | 0.74039061 | 0.389 | 0.053 | #####    | 29 | APOC1      | Immune-B cells |
| 1.43E-62  | 0.73920585 | 0.452 | 0.137 | 4.82E-58 | 29 | ABCA5      | Immune-B cells |
| 1.08E-65  | 0.72135901 | 0.459 | 0.137 | 3.65E-61 | 29 | ITGA6      | Immune-B cells |
| 5.30E-179 | 0.71961171 | 0.338 | 0.035 | #####    | 29 | ATP6V1C2   | Immune-B cells |
| 6.07E-45  | 0.70238505 | 0.455 | 0.167 | 2.04E-40 | 29 | ID3        | Immune-B cells |
| 9.47E-63  | 0.69841597 | 0.532 | 0.174 | 3.19E-58 | 29 | PTGER3     | Immune-B cells |
| 1.37E-99  | 0.69533874 | 0.363 | 0.065 | 4.63E-95 | 29 | RCAN2      | Immune-B cells |
| 4.47E-71  | 0.69047226 | 0.331 | 0.072 | 1.51E-66 | 29 | UAP1       | Immune-B cells |
| 2.07E-49  | 0.67799542 | 0.369 | 0.111 | 6.98E-45 | 29 | ADM        | Immune-B cells |
| 2.54E-50  | 0.67380818 | 0.36  | 0.105 | 8.55E-46 | 29 | DNAJA4     | Immune-B cells |
| 4.24E-42  | 0.67257878 | 0.309 | 0.091 | 1.43E-37 | 29 | P1-313I6.1 | Immune-B cells |
| 3.63E-42  | 0.66225597 | 0.49  | 0.204 | 1.22E-37 | 29 | DHRS7      | Immune-B cells |
| 4.02E-45  | 0.66212446 | 0.637 | 0.304 | 1.35E-40 | 29 | HERPUD1    | Immune-B cells |
| 9.06E-42  | 0.65210389 | 0.723 | 0.4   | 3.05E-37 | 29 | BSG        | Immune-B cells |
| 1.27E-85  | 0.65124758 | 0.99  | 0.852 | 4.29E-81 | 29 | RPL37A     | Immune-B cells |
| 7.95E-48  | 0.65092711 | 0.955 | 0.666 | 2.68E-43 | 29 | HSPB1      | Immune-B cells |
| 2.97E-81  | 0.65043663 | 0.271 | 0.045 | 1.00E-76 | 29 | CDA        | Immune-B cells |
| 1.82E-47  | 0.64955466 | 0.57  | 0.234 | 6.12E-43 | 29 | LGALS3     | Immune-B cells |
| 5.06E-94  | 0.6484497  | 0.271 | 0.04  | 1.71E-89 | 29 | KIT        | Immune-B cells |
| 5.01E-62  | 0.6445089  | 0.283 | 0.061 | 1.69E-57 | 29 | OXCT1      | Immune-B cells |
| 2.39E-38  | 0.63831962 | 0.777 | 0.448 | 8.04E-34 | 29 | SLC25A6    | Immune-B cells |
| 6.65E-43  | 0.63446853 | 0.672 | 0.333 | 2.24E-38 | 29 | DNAJA1     | Immune-B cells |
| 5.31E-39  | 0.63064987 | 0.662 | 0.349 | 1.79E-34 | 29 | ATP6V1F    | Immune-B cells |
| 1.48E-42  | 0.62771367 | 0.525 | 0.222 | 4.98E-38 | 29 | INC00969   | Immune-B cells |
| 2.61E-42  | 0.62571025 | 0.608 | 0.285 | 8.78E-38 | 29 | CKB        | Immune-B cells |
| 4.31E-152 | 0.62538318 | 0.252 | 0.023 | #####    | 29 | FAM13C     | Immune-B cells |
| 2.57E-130 | 0.61742469 | 0.283 | 0.033 | #####    | 29 | HEPACAM2   | Immune-B cells |
| 2.15E-43  | 0.61579711 | 0.548 | 0.233 | 7.23E-39 | 29 | FOXP1      | Immune-B cells |
| 4.02E-33  | 0.61048572 | 0.541 | 0.25  | 1.35E-28 | 29 | COX7A1     | Immune-B cells |
| 2.86E-45  | 0.61031371 | 0.729 | 0.366 | 9.63E-41 | 29 | CHCHD10    | Immune-B cells |
| 1.41E-41  | 0.60988459 | 0.455 | 0.174 | 4.76E-37 | 29 | RARRES3    | Immune-B cells |
| 7.34E-45  | 0.60975445 | 0.841 | 0.51  | 2.47E-40 | 29 | RTN4       | Immune-B cells |
| 1.46E-68  | 0.60667551 | 0.334 | 0.074 | 4.91E-64 | 29 | ATP6VOA4   | Immune-B cells |
| 1.40E-66  | 0.60191105 | 0.29  | 0.059 | 4.71E-62 | 29 | ERP27      | Immune-B cells |
| 2.27E-47  | 0.5987709  | 0.363 | 0.111 | 7.65E-43 | 29 | MOB1B      | Immune-B cells |
| 3.28E-45  | 0.59068828 | 0.815 | 0.432 | 1.10E-40 | 29 | IER2       | Immune-B cells |
| 1.36E-42  | 0.58223551 | 0.427 | 0.156 | 4.57E-38 | 29 | NEDD4L     | Immune-B cells |
| 1.23E-37  | 0.58117698 | 0.666 | 0.35  | 4.15E-33 | 29 | VAPA       | Immune-B cells |
| 9.70E-40  | 0.58059474 | 0.28  | 0.078 | 3.27E-35 | 29 | RGCC       | Immune-B cells |
| 3.92E-46  | 0.57546594 | 0.325 | 0.095 | 1.32E-41 | 29 | SHROOM3    | Immune-B cells |
| 1.95E-44  | 0.57374514 | 0.417 | 0.148 | 6.55E-40 | 29 | SLC25A39   | Immune-B cells |
| 2.38E-75  | 0.5736821  | 0.338 | 0.07  | 8.04E-71 | 29 | GPAT3      | Immune-B cells |
| 1.16E-46  | 0.56965798 | 0.825 | 0.431 | 3.92E-42 | 29 | DNAJB1     | Immune-B cells |
| 1.83E-40  | 0.56948426 | 0.822 | 0.486 | 6.16E-36 | 29 | HSPE1      | Immune-B cells |
| 1.58E-30  | 0.56592465 | 0.433 | 0.188 | 5.33E-26 | 29 | RARRES2    | Immune-B cells |
| 2.68E-40  | 0.56252733 | 0.908 | 0.574 | 9.04E-36 | 29 | UBC        | Immune-B cells |

|          |            |       |       |          |    |          |                |
|----------|------------|-------|-------|----------|----|----------|----------------|
| 5.23E-33 | 0.55904195 | 0.71  | 0.407 | 1.76E-28 | 29 | CYSTM1   | Immune-B cells |
| 1.34E-40 | 0.55893655 | 0.554 | 0.24  | 4.52E-36 | 29 | ATP6V1A  | Immune-B cells |
| 2.76E-30 | 0.55811741 | 0.382 | 0.161 | 9.29E-26 | 29 | MAP1LC3A | Immune-B cells |
| 3.17E-51 | 0.54607212 | 0.965 | 0.731 | 1.07E-46 | 29 | RPL6     | Immune-B cells |
| 2.44E-33 | 0.54131133 | 0.519 | 0.242 | 8.23E-29 | 29 | PPP1R15A | Immune-B cells |
| 1.28E-31 | 0.53906033 | 0.624 | 0.337 | 4.32E-27 | 29 | SLC25A5  | Immune-B cells |
| 1.78E-44 | 0.53895878 | 0.446 | 0.155 | 6.00E-40 | 29 | CLCNKB   | Immune-B cells |
| 7.89E-28 | 0.53569498 | 0.36  | 0.15  | 2.66E-23 | 29 | ZMPSTE24 | Immune-B cells |
| 7.62E-36 | 0.53279604 | 0.366 | 0.132 | 2.57E-31 | 29 | EPS8     | Immune-B cells |
| 1.89E-60 | 0.53001564 | 0.293 | 0.065 | 6.37E-56 | 29 | TMPRSS2  | Immune-B cells |
| 9.21E-29 | 0.52402656 | 0.373 | 0.154 | 3.10E-24 | 29 | DSG2     | Immune-B cells |
| 2.54E-38 | 0.51551076 | 0.325 | 0.105 | 8.57E-34 | 29 | NUPR2    | Immune-B cells |
| 8.94E-27 | 0.5055149  | 0.424 | 0.194 | 3.01E-22 | 29 | IFRD1    | Immune-B cells |
| 2.07E-26 | 0.5050971  | 0.446 | 0.215 | 6.96E-22 | 29 | JADE1    | Immune-B cells |
| 2.91E-39 | 0.50483713 | 0.341 | 0.108 | 9.80E-35 | 29 | CLDN8    | Immune-B cells |
| 3.49E-28 | 0.50408405 | 0.341 | 0.129 | 1.18E-23 | 29 | RNF152   | Immune-B cells |
| 1.06E-26 | 0.49877231 | 0.576 | 0.31  | 3.58E-22 | 29 | HSPA5    | Immune-B cells |
| 1.33E-87 | 0.4945786  | 0.812 | 0.287 | 4.50E-83 | 29 | IGFBP5   | Immune-B cells |
| 2.94E-42 | 0.48736508 | 0.946 | 0.6   | 9.92E-38 | 29 | FXYD2    | Immune-B cells |
| 2.02E-30 | 0.48155039 | 0.5   | 0.227 | 6.81E-26 | 29 | NR4A1    | Immune-B cells |
| 6.61E-26 | 0.48107627 | 0.532 | 0.27  | 2.23E-21 | 29 | KRT8     | Immune-B cells |
| 6.81E-42 | 0.47636669 | 0.971 | 0.771 | 2.30E-37 | 29 | RPS24    | Immune-B cells |
| 7.01E-32 | 0.47355144 | 0.611 | 0.301 | 2.36E-27 | 29 | HSPH1    | Immune-B cells |
| 6.85E-30 | 0.47218929 | 0.787 | 0.499 | 2.31E-25 | 29 | RPL36A   | Immune-B cells |
| 2.52E-25 | 0.47188874 | 0.42  | 0.2   | 8.48E-21 | 29 | ATP6V1E1 | Immune-B cells |
| 2.55E-29 | 0.46800669 | 0.701 | 0.392 | 8.60E-25 | 29 | RPS10    | Immune-B cells |
| 2.34E-64 | 0.46759712 | 1     | 0.946 | 7.90E-60 | 29 | RPL41    | Immune-B cells |
| 2.75E-32 | 0.46734385 | 0.876 | 0.62  | 9.25E-28 | 29 | RPL14    | Immune-B cells |
| 8.16E-25 | 0.4670541  | 0.602 | 0.344 | 2.75E-20 | 29 | COA3     | Immune-B cells |
| 7.21E-29 | 0.46336479 | 0.436 | 0.194 | 2.43E-24 | 29 | NCOA7    | Immune-B cells |
| 1.71E-30 | 0.46317643 | 0.933 | 0.672 | 5.77E-26 | 29 | EIF1     | Immune-B cells |
| 9.04E-53 | 0.46242281 | 0.28  | 0.064 | 3.05E-48 | 29 | RHBG     | Immune-B cells |
| 2.43E-32 | 0.46153307 | 0.36  | 0.134 | 8.20E-28 | 29 | MAGI1    | Immune-B cells |
| 8.57E-31 | 0.46131618 | 0.908 | 0.615 | 2.89E-26 | 29 | RPL24    | Immune-B cells |
| 5.72E-48 | 0.46038885 | 0.36  | 0.102 | 1.93E-43 | 29 | PCK1     | Immune-B cells |
| 4.73E-26 | 0.45759163 | 0.822 | 0.535 | 1.59E-21 | 29 | COX6A1   | Immune-B cells |
| 1.77E-34 | 0.45552301 | 0.943 | 0.731 | 5.96E-30 | 29 | RPS4X    | Immune-B cells |
| 1.51E-24 | 0.45323246 | 0.471 | 0.237 | 5.09E-20 | 29 | GABARAPL | Immune-B cells |
| 3.76E-30 | 0.45290885 | 0.758 | 0.424 | 1.27E-25 | 29 | FOSB     | Immune-B cells |
| 2.85E-33 | 0.45092553 | 0.908 | 0.624 | 9.62E-29 | 29 | RPS21    | Immune-B cells |
| 2.09E-30 | 0.45045764 | 0.901 | 0.614 | 7.05E-26 | 29 | RPL5     | Immune-B cells |
| 2.00E-53 | 0.45034531 | 1     | 0.943 | 6.73E-49 | 29 | RPS27    | Immune-B cells |
| 1.67E-21 | 0.4492261  | 0.331 | 0.149 | 5.62E-17 | 29 | MKKS     | Immune-B cells |
| 3.02E-39 | 0.44619233 | 1     | 0.779 | 1.02E-34 | 29 | HSP90AA1 | Immune-B cells |
| 1.35E-19 | 0.4459663  | 0.624 | 0.379 | 4.56E-15 | 29 | GADD45B  | Immune-B cells |
| 9.68E-37 | 0.44048808 | 0.943 | 0.607 | 3.26E-32 | 29 | HSPA1A   | Immune-B cells |
| 4.39E-32 | 0.44017591 | 0.404 | 0.155 | 1.48E-27 | 29 | CLCNKA   | Immune-B cells |
| 1.01E-25 | 0.43793522 | 0.701 | 0.402 | 3.40E-21 | 29 | HSPA8    | Immune-B cells |

|          |            |       |       |          |    |          |                |
|----------|------------|-------|-------|----------|----|----------|----------------|
| 3.26E-32 | 0.43736885 | 0.669 | 0.333 | 1.10E-27 | 29 | MAL      | Immune-B cells |
| 2.10E-25 | 0.43681314 | 0.904 | 0.624 | 7.07E-21 | 29 | UBB      | Immune-B cells |
| 2.50E-29 | 0.43212685 | 0.901 | 0.641 | 8.43E-25 | 29 | UQCRCQ   | Immune-B cells |
| 3.10E-17 | 0.42905479 | 0.653 | 0.427 | 1.05E-12 | 29 | DBI      | Immune-B cells |
| 9.60E-23 | 0.42791812 | 0.503 | 0.258 | 3.24E-18 | 29 | FAM107B  | Immune-B cells |
| 2.50E-20 | 0.42736185 | 0.576 | 0.337 | 8.44E-16 | 29 | SEPP1    | Immune-B cells |
| 2.72E-23 | 0.42222129 | 0.589 | 0.326 | 9.17E-19 | 29 | HSPD1    | Immune-B cells |
| 1.79E-19 | 0.42033282 | 0.29  | 0.126 | 6.03E-15 | 29 | LIMS1    | Immune-B cells |
| 1.39E-22 | 0.4189332  | 0.589 | 0.334 | 4.68E-18 | 29 | CCNL1    | Immune-B cells |
| 3.73E-17 | 0.41688404 | 0.296 | 0.139 | 1.26E-12 | 29 | PLEKHJ1  | Immune-B cells |
| 4.32E-21 | 0.41655623 | 0.449 | 0.239 | 1.46E-16 | 29 | C6orf48  | Immune-B cells |
| 6.16E-22 | 0.41483999 | 0.347 | 0.156 | 2.07E-17 | 29 | SERTAD1  | Immune-B cells |
| 2.65E-21 | 0.41067596 | 0.726 | 0.461 | 8.91E-17 | 29 | CHCHD2   | Immune-B cells |
| 9.91E-19 | 0.41024348 | 0.424 | 0.224 | 3.34E-14 | 29 | GADD45A  | Immune-B cells |
| 2.42E-24 | 0.40897095 | 0.901 | 0.633 | 8.16E-20 | 29 | RPL18    | Immune-B cells |
| 9.78E-23 | 0.40758133 | 0.258 | 0.098 | 3.30E-18 | 29 | NRDC     | Immune-B cells |
| 2.18E-18 | 0.4071363  | 0.535 | 0.318 | 7.35E-14 | 29 | SQSTM1   | Immune-B cells |
| 7.23E-29 | 0.40257491 | 0.962 | 0.721 | 2.44E-24 | 29 | RPL27A   | Immune-B cells |
| 2.12E-20 | 0.40252458 | 0.525 | 0.301 | 7.16E-16 | 29 | MSI2     | Immune-B cells |
| 2.73E-31 | 0.40146993 | 0.939 | 0.712 | 9.21E-27 | 29 | RPL37    | Immune-B cells |
| 7.72E-19 | 0.40091145 | 0.268 | 0.112 | 2.60E-14 | 29 | TRIB1    | Immune-B cells |
| 8.25E-21 | 0.39745817 | 0.535 | 0.3   | 2.78E-16 | 29 | NDUFA6   | Immune-B cells |
| 7.50E-20 | 0.3969531  | 0.258 | 0.103 | 2.53E-15 | 29 | LBH      | Immune-B cells |
| 1.12E-21 | 0.39591429 | 0.774 | 0.503 | 3.76E-17 | 29 | NDUFS5   | Immune-B cells |
| 3.72E-19 | 0.39331209 | 0.599 | 0.357 | 1.25E-14 | 29 | CEBPD    | Immune-B cells |
| 2.08E-22 | 0.39271286 | 0.268 | 0.103 | 7.01E-18 | 29 | ITPR2    | Immune-B cells |
| 4.08E-30 | 0.39252641 | 0.981 | 0.792 | 1.37E-25 | 29 | COX7C    | Immune-B cells |
| 2.22E-22 | 0.39231508 | 0.841 | 0.569 | 7.49E-18 | 29 | HSP90AB1 | Immune-B cells |
| 2.21E-20 | 0.38932103 | 0.459 | 0.244 | 7.44E-16 | 29 | PFN2     | Immune-B cells |
| 4.35E-25 | 0.38912977 | 0.892 | 0.617 | 1.46E-20 | 29 | COX4I1   | Immune-B cells |
| 1.68E-25 | 0.38908394 | 0.955 | 0.712 | 5.66E-21 | 29 | RPL15    | Immune-B cells |
| 2.04E-33 | 0.38718432 | 0.99  | 0.897 | 6.88E-29 | 29 | RPL21    | Immune-B cells |
| 2.53E-34 | 0.38710365 | 0.987 | 0.845 | 8.51E-30 | 29 | RPS6     | Immune-B cells |
| 4.29E-19 | 0.38608161 | 0.831 | 0.561 | 1.44E-14 | 29 | CD9      | Immune-B cells |
| 1.90E-24 | 0.38593861 | 0.866 | 0.597 | 6.41E-20 | 29 | MTRNR2L8 | Immune-B cells |
| 4.23E-36 | 0.38351331 | 0.987 | 0.849 | 1.43E-31 | 29 | RPL36    | Immune-B cells |
| 2.31E-18 | 0.38339277 | 0.424 | 0.23  | 7.79E-14 | 29 | C9orf16  | Immune-B cells |
| 4.76E-28 | 0.38269466 | 0.946 | 0.669 | 1.60E-23 | 29 | RPS2     | Immune-B cells |
| 7.72E-15 | 0.38040147 | 0.315 | 0.161 | 2.60E-10 | 29 | UHMK1    | Immune-B cells |
| 1.44E-18 | 0.37890152 | 0.844 | 0.637 | 4.86E-14 | 29 | TXNIP    | Immune-B cells |
| 5.75E-22 | 0.3786609  | 0.85  | 0.592 | 1.94E-17 | 29 | RPL30    | Immune-B cells |
| 2.10E-18 | 0.37833092 | 0.841 | 0.598 | 7.09E-14 | 29 | COX7A2   | Immune-B cells |
| 1.08E-26 | 0.37828598 | 0.933 | 0.696 | 3.64E-22 | 29 | RPL38    | Immune-B cells |
| 6.27E-24 | 0.37744383 | 0.946 | 0.722 | 2.11E-19 | 29 | FAU      | Immune-B cells |
| 6.70E-25 | 0.37730332 | 0.927 | 0.725 | 2.26E-20 | 29 | RPL8     | Immune-B cells |
| 4.51E-35 | 0.37684799 | 1     | 0.992 | 1.52E-30 | 29 | MT-ND4L  | Immune-B cells |
| 3.13E-26 | 0.37342041 | 0.939 | 0.725 | 1.06E-21 | 29 | RPS17    | Immune-B cells |
| 1.89E-20 | 0.37258573 | 0.618 | 0.367 | 6.37E-16 | 29 | CYCS     | Immune-B cells |

|          |            |       |       |          |    |          |                |
|----------|------------|-------|-------|----------|----|----------|----------------|
| 2.03E-19 | 0.37147219 | 0.43  | 0.224 | 6.84E-15 | 29 | ACAT1    | Immune-B cells |
| 1.97E-16 | 0.36980383 | 0.344 | 0.175 | 6.64E-12 | 29 | MRPS5    | Immune-B cells |
| 1.60E-22 | 0.36635355 | 0.78  | 0.502 | 5.41E-18 | 29 | COX8A    | Immune-B cells |
| 5.05E-26 | 0.36363268 | 0.962 | 0.764 | 1.70E-21 | 29 | RPL31    | Immune-B cells |
| 1.43E-19 | 0.36318756 | 0.882 | 0.644 | 4.80E-15 | 29 | ACTG1    | Immune-B cells |
| 7.44E-19 | 0.36245749 | 0.796 | 0.553 | 2.51E-14 | 29 | TOMM7    | Immune-B cells |
| 3.73E-19 | 0.36012714 | 0.624 | 0.379 | 1.26E-14 | 29 | SLIRP    | Immune-B cells |
| 1.02E-13 | 0.35556214 | 0.436 | 0.261 | 3.42E-09 | 29 | BRD2     | Immune-B cells |
| 2.82E-19 | 0.35496293 | 0.857 | 0.599 | 9.50E-15 | 29 | RPL7A    | Immune-B cells |
| 5.83E-29 | 0.35246505 | 0.271 | 0.089 | 1.97E-24 | 29 | TSPAN7   | Immune-B cells |
| 4.78E-20 | 0.35063664 | 0.283 | 0.119 | 1.61E-15 | 29 | FAM195A  | Immune-B cells |
| 6.53E-12 | 0.349817   | 0.389 | 0.235 | 2.20E-07 | 29 | HNRNPA0  | Immune-B cells |
| 4.73E-24 | 0.34915608 | 0.847 | 0.525 | 1.59E-19 | 29 | EGR1     | Immune-B cells |
| 2.08E-24 | 0.34894758 | 0.946 | 0.757 | 7.01E-20 | 29 | RPL3     | Immune-B cells |
| 2.72E-15 | 0.34853638 | 0.312 | 0.156 | 9.17E-11 | 29 | SDC2     | Immune-B cells |
| 1.36E-29 | 0.34803853 | 0.997 | 0.843 | 4.57E-25 | 29 | RPS14    | Immune-B cells |
| 3.27E-18 | 0.34642076 | 0.828 | 0.601 | 1.10E-13 | 29 | RPL23    | Immune-B cells |
| 3.08E-18 | 0.34633771 | 0.268 | 0.115 | 1.04E-13 | 29 | PNPLA8   | Immune-B cells |
| 1.30E-16 | 0.34594327 | 0.535 | 0.322 | 4.38E-12 | 29 | SVIP     | Immune-B cells |
| 1.29E-19 | 0.34542464 | 0.564 | 0.325 | 4.33E-15 | 29 | VDAC1    | Immune-B cells |
| 4.33E-12 | 0.34528502 | 0.252 | 0.127 | 1.46E-07 | 29 | MKNK2    | Immune-B cells |
| 1.15E-18 | 0.34073538 | 0.901 | 0.683 | 3.89E-14 | 29 | RPS20    | Immune-B cells |
| 1.96E-12 | 0.33909645 | 0.268 | 0.136 | 6.60E-08 | 29 | ARL4D    | Immune-B cells |
| 1.40E-13 | 0.3386803  | 0.385 | 0.221 | 4.72E-09 | 29 | DMKN     | Immune-B cells |
| 2.18E-20 | 0.33853827 | 0.844 | 0.59  | 7.34E-16 | 29 | UQCR11   | Immune-B cells |
| 8.36E-27 | 0.33508425 | 0.984 | 0.83  | 2.82E-22 | 29 | RPS12    | Immune-B cells |
| 1.58E-18 | 0.3310778  | 0.487 | 0.265 | 5.32E-14 | 29 | TFCP2L1  | Immune-B cells |
| 9.30E-21 | 0.32894988 | 0.917 | 0.645 | 3.13E-16 | 29 | RPS16    | Immune-B cells |
| 3.95E-14 | 0.32832499 | 0.283 | 0.141 | 1.33E-09 | 29 | COPRS    | Immune-B cells |
| 6.59E-23 | 0.32719681 | 0.978 | 0.801 | 2.22E-18 | 29 | RPL11    | Immune-B cells |
| 4.46E-17 | 0.32680973 | 0.825 | 0.599 | 1.50E-12 | 29 | RPL27    | Immune-B cells |
| 1.97E-19 | 0.32582822 | 0.885 | 0.606 | 6.64E-15 | 29 | COX7B    | Immune-B cells |
| 1.54E-25 | 0.32486085 | 0.971 | 0.812 | 5.20E-21 | 29 | ATP5E    | Immune-B cells |
| 1.93E-12 | 0.3245365  | 0.43  | 0.262 | 6.52E-08 | 29 | DNAJB6   | Immune-B cells |
| 2.02E-28 | 0.32420518 | 0.994 | 0.881 | 6.80E-24 | 29 | RPS18    | Immune-B cells |
| 9.88E-17 | 0.32247022 | 0.596 | 0.371 | 3.33E-12 | 29 | EIF3K    | Immune-B cells |
| 3.11E-11 | 0.32189973 | 0.334 | 0.191 | 1.05E-06 | 29 | DNAJB4   | Immune-B cells |
| 2.65E-28 | 0.32160186 | 0.968 | 0.676 | 8.93E-24 | 29 | FOS      | Immune-B cells |
| 1.11E-15 | 0.32063296 | 0.535 | 0.312 | 3.73E-11 | 29 | BTG2     | Immune-B cells |
| 1.24E-17 | 0.3176706  | 0.86  | 0.618 | 4.18E-13 | 29 | ATP5L    | Immune-B cells |
| 5.01E-17 | 0.31765066 | 0.895 | 0.635 | 1.69E-12 | 29 | RPL10A   | Immune-B cells |
| 6.73E-12 | 0.31380565 | 0.363 | 0.207 | 2.27E-07 | 29 | NFRSF12A | Immune-B cells |
| 2.22E-16 | 0.31363815 | 0.497 | 0.289 | 7.48E-12 | 29 | ADI1     | Immune-B cells |
| 1.00E-11 | 0.31273402 | 0.255 | 0.131 | 3.37E-07 | 29 | TBC1D1   | Immune-B cells |
| 1.26E-13 | 0.30793119 | 0.283 | 0.141 | 4.26E-09 | 29 | OGDHL    | Immune-B cells |
| 2.81E-15 | 0.30717024 | 0.825 | 0.602 | 9.45E-11 | 29 | COX6C    | Immune-B cells |
| 5.66E-14 | 0.30636861 | 0.516 | 0.321 | 1.91E-09 | 29 | TRMT112  | Immune-B cells |
| 2.15E-14 | 0.30522735 | 0.475 | 0.284 | 7.23E-10 | 29 | COX7A2L  | Immune-B cells |

|          |            |       |       |          |    |          |                |
|----------|------------|-------|-------|----------|----|----------|----------------|
| 4.33E-16 | 0.3047576  | 0.854 | 0.576 | 1.46E-11 | 29 | COX5B    | Immune-B cells |
| 1.79E-17 | 0.30128633 | 0.777 | 0.513 | 6.03E-13 | 29 | UQCR10   | Immune-B cells |
| 2.57E-18 | 0.30074155 | 0.312 | 0.143 | 8.67E-14 | 29 | 11-532F1 | Immune-B cells |
| 1.95E-10 | 0.29963395 | 0.29  | 0.166 | 6.57E-06 | 29 | MIEN1    | Immune-B cells |
| 2.19E-14 | 0.29844876 | 0.729 | 0.483 | 7.37E-10 | 29 | RPSA     | Immune-B cells |
| 2.78E-18 | 0.29774635 | 0.78  | 0.509 | 9.37E-14 | 29 | HLA-B    | Immune-B cells |
| 5.42E-20 | 0.29637592 | 0.745 | 0.463 | 1.82E-15 | 29 | JUNB     | Immune-B cells |
| 3.52E-12 | 0.29540082 | 0.28  | 0.145 | 1.18E-07 | 29 | BTG3     | Immune-B cells |
| 2.34E-21 | 0.29383392 | 0.987 | 0.82  | 7.89E-17 | 29 | RPL26    | Immune-B cells |
| 6.12E-14 | 0.29244244 | 0.828 | 0.609 | 2.06E-09 | 29 | USMG5    | Immune-B cells |
| 7.44E-13 | 0.29241145 | 0.484 | 0.302 | 2.51E-08 | 29 | FAM133B  | Immune-B cells |
| 1.06E-13 | 0.29046111 | 0.271 | 0.131 | 3.56E-09 | 29 | MARCKSL1 | Immune-B cells |
| 4.46E-16 | 0.28904357 | 0.873 | 0.647 | 1.50E-11 | 29 | RPL22    | Immune-B cells |
| 2.00E-14 | 0.28761357 | 0.659 | 0.446 | 6.74E-10 | 29 | COX17    | Immune-B cells |
| 3.96E-09 | 0.28518476 | 0.274 | 0.159 | 0.00013  | 29 | CRYL1    | Immune-B cells |
| 4.16E-12 | 0.28477201 | 0.662 | 0.457 | 1.40E-07 | 29 | OAZ1     | Immune-B cells |
| 2.41E-09 | 0.28361457 | 0.264 | 0.149 | 8.11E-05 | 29 | PRKAA2   | Immune-B cells |
| 7.77E-11 | 0.28231212 | 0.252 | 0.133 | 2.62E-06 | 29 | SLC3A2   | Immune-B cells |
| 4.50E-13 | 0.28149169 | 0.503 | 0.314 | 1.52E-08 | 29 | SMDT1    | Immune-B cells |
| 2.64E-12 | 0.28141384 | 0.615 | 0.419 | 8.89E-08 | 29 | ST13     | Immune-B cells |
| 1.73E-12 | 0.28062357 | 0.331 | 0.183 | 5.82E-08 | 29 | ANP32A   | Immune-B cells |
| 1.57E-08 | 0.27947178 | 0.274 | 0.165 | 0.00053  | 29 | GNG12    | Immune-B cells |
| 6.38E-15 | 0.27917872 | 0.869 | 0.595 | 2.15E-10 | 29 | PPDPF    | Immune-B cells |
| 7.53E-22 | 0.27849531 | 0.99  | 0.869 | 2.54E-17 | 29 | RPL32    | Immune-B cells |
| 4.57E-14 | 0.27814164 | 0.586 | 0.375 | 1.54E-09 | 29 | ATP5H    | Immune-B cells |
| 1.29E-12 | 0.27589057 | 0.443 | 0.27  | 4.34E-08 | 29 | GLTSCR2  | Immune-B cells |
| 2.44E-10 | 0.2752671  | 0.494 | 0.332 | 8.22E-06 | 29 | NDUFB8   | Immune-B cells |
| 2.19E-19 | 0.27477416 | 0.949 | 0.644 | 7.38E-15 | 29 | HSPA1B   | Immune-B cells |
| 1.27E-17 | 0.27475715 | 0.975 | 0.808 | 4.27E-13 | 29 | RPS25    | Immune-B cells |
| 9.74E-08 | 0.2722109  | 0.436 | 0.302 | 0.00328  | 29 | ID2      | Immune-B cells |
| 5.56E-13 | 0.27046704 | 0.258 | 0.126 | 1.87E-08 | 29 | ATP6V1H  | Immune-B cells |
| 1.17E-18 | 0.26913064 | 0.334 | 0.151 | 3.96E-14 | 29 | KCTD12   | Immune-B cells |
| 6.26E-13 | 0.26862574 | 0.494 | 0.303 | 2.11E-08 | 29 | COX5A    | Immune-B cells |
| 3.96E-10 | 0.2655556  | 0.261 | 0.144 | 1.33E-05 | 29 | FAM60A   | Immune-B cells |
| 3.94E-23 | 0.26538576 | 0.997 | 0.952 | 1.33E-18 | 29 | RPL34    | Immune-B cells |
| 4.97E-14 | 0.2647078  | 0.783 | 0.534 | 1.67E-09 | 29 | KLF6     | Immune-B cells |
| 7.76E-12 | 0.26416075 | 0.449 | 0.284 | 2.61E-07 | 29 | AURKAIP1 | Immune-B cells |
| 5.66E-11 | 0.26412278 | 0.299 | 0.167 | 1.91E-06 | 29 | TTC1     | Immune-B cells |
| 4.77E-21 | 0.2622717  | 0.987 | 0.897 | 1.61E-16 | 29 | RPL39    | Immune-B cells |
| 6.98E-11 | 0.26211873 | 0.497 | 0.327 | 2.35E-06 | 29 | NDUFA5   | Immune-B cells |
| 2.02E-11 | 0.26145448 | 0.503 | 0.315 | 6.81E-07 | 29 | ELF3     | Immune-B cells |
| 1.34E-07 | 0.25995699 | 0.373 | 0.244 | 0.00453  | 29 | ANXA4    | Immune-B cells |
| 2.44E-17 | 0.25918498 | 0.984 | 0.862 | 8.21E-13 | 29 | RPS28    | Immune-B cells |
| 6.40E-10 | 0.25566814 | 0.65  | 0.464 | 2.16E-05 | 29 | ATP5D    | Immune-B cells |
| 2.19E-10 | 0.255252   | 0.408 | 0.254 | 7.36E-06 | 29 | 11R4458H | Immune-B cells |
| 1.32E-08 | 0.25513087 | 0.347 | 0.222 | 0.00044  | 29 | NDUFV2   | Immune-B cells |
| 6.30E-11 | 0.25472374 | 0.404 | 0.247 | 2.12E-06 | 29 | MPC1     | Immune-B cells |
| 9.53E-13 | 0.25463485 | 0.659 | 0.437 | 3.21E-08 | 29 | NDUFB9   | Immune-B cells |

|           |            |       |       |          |    |          |                   |
|-----------|------------|-------|-------|----------|----|----------|-------------------|
| 8.79E-13  | 0.25449368 | 0.803 | 0.564 | 2.96E-08 | 29 | DUSP1    | Immune-B cells    |
| 5.51E-10  | 0.25025507 | 0.296 | 0.17  | 1.86E-05 | 29 | SLC25A4  | Immune-B cells    |
| 5.21E-144 | 1.75421484 | 0.935 | 0.411 | #####    | 30 | CRYAB    | Immune-Neutrophil |
| 4.82E-157 | 1.70028176 | 0.711 | 0.166 | #####    | 30 | ID3      | Immune-Neutrophil |
| 3.11E-175 | 1.57243144 | 0.718 | 0.16  | #####    | 30 | NUPR1    | Immune-Neutrophil |
| 6.20E-126 | 1.54350103 | 0.687 | 0.189 | #####    | 30 | ID1      | Immune-Neutrophil |
| 1.04E-143 | 1.53712469 | 0.966 | 0.462 | #####    | 30 | JUNB     | Immune-Neutrophil |
| 3.21E-91  | 1.51235175 | 0.48  | 0.117 | 1.08E-86 | 30 | CCL2     | Immune-Neutrophil |
| 1.23E-149 | 1.49754992 | 0.786 | 0.219 | #####    | 30 | SOCS3    | Immune-Neutrophil |
| 3.42E-172 | 1.46691111 | 0.711 | 0.154 | #####    | 30 | IRF1     | Immune-Neutrophil |
| 6.57E-166 | 1.37746983 | 0.643 | 0.132 | #####    | 30 | ID4      | Immune-Neutrophil |
| 3.19E-129 | 1.37171125 | 0.779 | 0.24  | #####    | 30 | PPP1R15A | Immune-Neutrophil |
| 8.40E-190 | 1.34720665 | 0.432 | 0.051 | #####    | 30 | IGFBP3   | Immune-Neutrophil |
| 5.10E-117 | 1.28619673 | 0.844 | 0.31  | #####    | 30 | BTG2     | Immune-Neutrophil |
| 2.89E-118 | 1.27656884 | 0.667 | 0.182 | #####    | 30 | CYR61    | Immune-Neutrophil |
| 8.83E-102 | 1.25558551 | 0.871 | 0.377 | 2.98E-97 | 30 | GADD45B  | Immune-Neutrophil |
| 2.18E-108 | 1.24204417 | 0.932 | 0.432 | #####    | 30 | IER2     | Immune-Neutrophil |
| 6.51E-116 | 1.23659448 | 0.871 | 0.313 | #####    | 30 | ATF3     | Immune-Neutrophil |
| 8.90E-98  | 1.16235833 | 0.82  | 0.313 | 3.00E-93 | 30 | ELF3     | Immune-Neutrophil |
| 2.46E-116 | 1.14781979 | 0.612 | 0.149 | #####    | 30 | ADAMTS1  | Immune-Neutrophil |
| 2.97E-107 | 1.14321305 | 0.99  | 0.6   | #####    | 30 | JUN      | Immune-Neutrophil |
| 4.29E-109 | 1.123291   | 0.68  | 0.211 | #####    | 30 | PAX8     | Immune-Neutrophil |
| 6.05E-93  | 1.11369648 | 0.728 | 0.258 | 2.04E-88 | 30 | SRSF7    | Immune-Neutrophil |
| 2.47E-121 | 1.10073684 | 0.524 | 0.108 | #####    | 30 | MAFF     | Immune-Neutrophil |
| 8.79E-86  | 1.09925123 | 0.908 | 0.436 | 2.96E-81 | 30 | ZFP36    | Immune-Neutrophil |
| 2.69E-93  | 1.08434185 | 0.639 | 0.193 | 9.05E-89 | 30 | NCOA7    | Immune-Neutrophil |
| 3.68E-98  | 1.07982996 | 0.745 | 0.245 | 1.24E-93 | 30 | CLDN4    | Immune-Neutrophil |
| 8.64E-82  | 1.07025479 | 0.952 | 0.525 | 2.91E-77 | 30 | EGR1     | Immune-Neutrophil |
| 2.02E-73  | 1.06943704 | 0.656 | 0.24  | 6.82E-69 | 30 | RASD1    | Immune-Neutrophil |
| 2.37E-58  | 1.03974386 | 0.701 | 0.309 | 7.99E-54 | 30 | HSPA5    | Immune-Neutrophil |
| 1.02E-95  | 1.03103369 | 0.796 | 0.298 | 3.43E-91 | 30 | TACSTD2  | Immune-Neutrophil |
| 2.43E-154 | 1.02667366 | 0.646 | 0.13  | #####    | 30 | PFKFB3   | Immune-Neutrophil |
| 4.75E-140 | 1.02667076 | 0.558 | 0.11  | #####    | 30 | ODC1     | Immune-Neutrophil |
| 1.27E-80  | 1.00764626 | 0.643 | 0.22  | 4.27E-76 | 30 | CITED2   | Immune-Neutrophil |
| 1.99E-77  | 1.0076399  | 0.905 | 0.424 | 6.72E-73 | 30 | FOSB     | Immune-Neutrophil |
| 2.50E-75  | 1.00763748 | 0.898 | 0.444 | 8.41E-71 | 30 | HES1     | Immune-Neutrophil |
| 3.81E-106 | 0.99369503 | 0.616 | 0.16  | #####    | 30 | H1FO     | Immune-Neutrophil |
| 4.93E-95  | 0.97605766 | 0.969 | 0.655 | 1.66E-90 | 30 | H3F3B    | Immune-Neutrophil |
| 7.89E-73  | 0.97472207 | 0.793 | 0.356 | 2.66E-68 | 30 | CEBPD    | Immune-Neutrophil |
| 2.17E-80  | 0.96912747 | 0.884 | 0.431 | 7.32E-76 | 30 | DNAJB1   | Immune-Neutrophil |
| 2.40E-86  | 0.96411221 | 0.544 | 0.143 | 8.09E-82 | 30 | CTGF     | Immune-Neutrophil |
| 2.92E-99  | 0.95731298 | 0.69  | 0.207 | 9.83E-95 | 30 | INC01320 | Immune-Neutrophil |
| 4.96E-68  | 0.93366224 | 0.854 | 0.502 | 1.67E-63 | 30 | PEBP1    | Immune-Neutrophil |
| 7.94E-121 | 0.92228161 | 0.486 | 0.093 | #####    | 30 | HIST1H1C | Immune-Neutrophil |
| 2.60E-81  | 0.91778365 | 0.99  | 0.676 | 8.75E-77 | 30 | FOS      | Immune-Neutrophil |
| 3.71E-186 | 0.90249116 | 0.537 | 0.078 | #####    | 30 | GMDS     | Immune-Neutrophil |
| 1.02E-228 | 0.89759619 | 0.435 | 0.043 | #####    | 30 | CPE      | Immune-Neutrophil |
| 2.66E-76  | 0.89489619 | 0.796 | 0.332 | 8.95E-72 | 30 | DNAJA1   | Immune-Neutrophil |

|           |            |       |       |          |    |          |                   |
|-----------|------------|-------|-------|----------|----|----------|-------------------|
| 3.34E-99  | 0.88439453 | 0.541 | 0.131 | 1.13E-94 | 30 | CPVL     | Immune-Neutrophil |
| 1.49E-68  | 0.87356903 | 0.769 | 0.332 | 5.03E-64 | 30 | CCNL1    | Immune-Neutrophil |
| 3.63E-68  | 0.8702015  | 0.789 | 0.369 | 1.22E-63 | 30 | TPM1     | Immune-Neutrophil |
| 1.57E-73  | 0.86844017 | 0.956 | 0.607 | 5.28E-69 | 30 | HSPA1A   | Immune-Neutrophil |
| 2.92E-56  | 0.84709673 | 0.721 | 0.31  | 9.85E-52 | 30 | NFKBIA   | Immune-Neutrophil |
| 6.65E-128 | 0.83518243 | 0.541 | 0.106 | #####    | 30 | RNF144B  | Immune-Neutrophil |
| 3.33E-63  | 0.82336558 | 0.711 | 0.304 | 1.12E-58 | 30 | BCAM     | Immune-Neutrophil |
| 1.82E-114 | 0.81768074 | 0.391 | 0.064 | #####    | 30 | TFPI2    | Immune-Neutrophil |
| 2.32E-138 | 0.817461   | 0.66  | 0.145 | #####    | 30 | SOD3     | Immune-Neutrophil |
| 2.18E-140 | 0.81112357 | 0.5   | 0.086 | #####    | 30 | FOXC1    | Immune-Neutrophil |
| 1.73E-47  | 0.79531904 | 0.728 | 0.344 | 5.83E-43 | 30 | HLA-E    | Immune-Neutrophil |
| 5.93E-65  | 0.7931564  | 0.976 | 0.644 | 2.00E-60 | 30 | HSPA1B   | Immune-Neutrophil |
| 0         | 0.79261204 | 0.272 | 0.011 | 0        | 30 | C116366  | Immune-Neutrophil |
| 1.06E-76  | 0.7846177  | 0.595 | 0.187 | 3.56E-72 | 30 | PERP     | Immune-Neutrophil |
| 1.76E-79  | 0.77076663 | 0.636 | 0.196 | 5.92E-75 | 30 | KLF10    | Immune-Neutrophil |
| 1.17E-49  | 0.76543482 | 0.558 | 0.211 | 3.93E-45 | 30 | C8orf4   | Immune-Neutrophil |
| 6.93E-168 | 0.76046276 | 0.466 | 0.063 | #####    | 30 | AKR1C1   | Immune-Neutrophil |
| 1.53E-77  | 0.75732958 | 0.456 | 0.112 | 5.16E-73 | 30 | RND3     | Immune-Neutrophil |
| 2.38E-54  | 0.74403458 | 0.544 | 0.19  | 8.01E-50 | 30 | DNAJB4   | Immune-Neutrophil |
| 1.44E-88  | 0.74164959 | 0.517 | 0.132 | 4.84E-84 | 30 | PDXK     | Immune-Neutrophil |
| 3.84E-301 | 0.74134087 | 0.378 | 0.025 | #####    | 30 | IRX3     | Immune-Neutrophil |
| 1.10E-51  | 0.73834974 | 0.667 | 0.278 | 3.72E-47 | 30 | LMNA     | Immune-Neutrophil |
| 6.88E-38  | 0.72420678 | 0.626 | 0.301 | 2.32E-33 | 30 | ID2      | Immune-Neutrophil |
| 1.59E-43  | 0.71937298 | 0.67  | 0.301 | 5.36E-39 | 30 | SNHG9    | Immune-Neutrophil |
| 8.63E-187 | 0.70998214 | 0.357 | 0.035 | #####    | 30 | PHYHIP1L | Immune-Neutrophil |
| 3.12E-60  | 0.70178173 | 0.548 | 0.181 | 1.05E-55 | 30 | ERRFI1   | Immune-Neutrophil |
| 5.40E-49  | 0.69550129 | 0.718 | 0.326 | 1.82E-44 | 30 | HSPD1    | Immune-Neutrophil |
| 9.46E-54  | 0.69060506 | 0.629 | 0.254 | 3.19E-49 | 30 | MRPS6    | Immune-Neutrophil |
| 3.13E-45  | 0.68840373 | 0.313 | 0.085 | 1.05E-40 | 30 | MTRNR2L1 | Immune-Neutrophil |
| 1.65E-86  | 0.68635238 | 0.435 | 0.097 | 5.57E-82 | 30 | EFNA1    | Immune-Neutrophil |
| 6.57E-70  | 0.68499435 | 0.466 | 0.124 | 2.21E-65 | 30 | PLEKHH2  | Immune-Neutrophil |
| 1.05E-212 | 0.6817621  | 0.418 | 0.042 | #####    | 30 | CRNDE    | Immune-Neutrophil |
| 3.05E-107 | 0.68035152 | 0.391 | 0.067 | #####    | 30 | EGOT     | Immune-Neutrophil |
| 2.23E-59  | 0.66660846 | 0.99  | 0.779 | 7.51E-55 | 30 | HSP90AA1 | Immune-Neutrophil |
| 4.42E-64  | 0.66426592 | 0.656 | 0.226 | 1.49E-59 | 30 | NR4A1    | Immune-Neutrophil |
| 3.41E-50  | 0.66363891 | 0.541 | 0.195 | 1.15E-45 | 30 | THBS1    | Immune-Neutrophil |
| 2.90E-44  | 0.66148697 | 0.731 | 0.352 | 9.76E-40 | 30 | MCL1     | Immune-Neutrophil |
| 7.25E-60  | 0.65989422 | 0.548 | 0.181 | 2.44E-55 | 30 | CLDN3    | Immune-Neutrophil |
| 4.11E-25  | 0.65540314 | 0.34  | 0.135 | 1.38E-20 | 30 | HSPA6    | Immune-Neutrophil |
| 7.76E-50  | 0.65119183 | 0.622 | 0.26  | 2.61E-45 | 30 | ARHGAP29 | Immune-Neutrophil |
| 2.75E-53  | 0.65050933 | 0.568 | 0.2   | 9.27E-49 | 30 | RPS4Y1   | Immune-Neutrophil |
| 1.60E-58  | 0.63467744 | 0.398 | 0.108 | 5.39E-54 | 30 | NFRSF11B | Immune-Neutrophil |
| 9.29E-63  | 0.63427226 | 0.507 | 0.155 | 3.13E-58 | 30 | SDC2     | Immune-Neutrophil |
| 1.28E-72  | 0.6324132  | 0.32  | 0.063 | 4.31E-68 | 30 | ARL5B    | Immune-Neutrophil |
| 2.30E-58  | 0.62859589 | 0.5   | 0.155 | 7.75E-54 | 30 | SERTAD1  | Immune-Neutrophil |
| 5.23E-62  | 0.62556737 | 0.592 | 0.199 | 1.76E-57 | 30 | BICC1    | Immune-Neutrophil |
| 1.97E-85  | 0.62393236 | 0.422 | 0.089 | 6.65E-81 | 30 | PMAIP1   | Immune-Neutrophil |
| 2.72E-47  | 0.6236863  | 0.915 | 0.574 | 9.16E-43 | 30 | UBC      | Immune-Neutrophil |

|           |            |       |       |          |    |           |                   |
|-----------|------------|-------|-------|----------|----|-----------|-------------------|
| 3.37E-50  | 0.6225425  | 0.432 | 0.136 | 1.13E-45 | 30 | HEXIM1    | Immune-Neutrophil |
| 7.07E-44  | 0.62013289 | 0.677 | 0.3   | 2.38E-39 | 30 | HSPH1     | Immune-Neutrophil |
| 1.95E-97  | 0.61883162 | 0.456 | 0.094 | 6.58E-93 | 30 | PROM1     | Immune-Neutrophil |
| 1.21E-122 | 0.61133993 | 0.374 | 0.056 | #####    | 30 | EHF       | Immune-Neutrophil |
| 5.75E-37  | 0.60771081 | 0.854 | 0.569 | 1.94E-32 | 30 | HSP90AB1  | Immune-Neutrophil |
| 6.55E-114 | 0.59959375 | 0.299 | 0.039 | #####    | 30 | 11-295M3  | Immune-Neutrophil |
| 2.56E-66  | 0.5985681  | 0.418 | 0.109 | 8.62E-62 | 30 | SCCPDH    | Immune-Neutrophil |
| 1.96E-147 | 0.59751343 | 0.347 | 0.04  | #####    | 30 | SPOCK2    | Immune-Neutrophil |
| 7.63E-46  | 0.59663846 | 0.803 | 0.394 | 2.57E-41 | 30 | S100A13   | Immune-Neutrophil |
| 1.51E-129 | 0.5934877  | 0.255 | 0.025 | #####    | 30 | HIST1H2BC | Immune-Neutrophil |
| 9.75E-35  | 0.59253694 | 0.619 | 0.304 | 3.28E-30 | 30 | HERPUD1   | Immune-Neutrophil |
| 3.51E-40  | 0.56919877 | 0.959 | 0.757 | 1.18E-35 | 30 | RPL3      | Immune-Neutrophil |
| 1.99E-182 | 0.5671474  | 0.279 | 0.022 | #####    | 30 | LIX1      | Immune-Neutrophil |
| 8.69E-41  | 0.56504767 | 0.782 | 0.403 | 2.93E-36 | 30 | TSC22D1   | Immune-Neutrophil |
| 1.04E-33  | 0.56109377 | 0.452 | 0.177 | 3.51E-29 | 30 | D-3252C9  | Immune-Neutrophil |
| 8.34E-39  | 0.56107233 | 0.384 | 0.131 | 2.81E-34 | 30 | MARCKSL1  | Immune-Neutrophil |
| 1.51E-62  | 0.55952683 | 0.364 | 0.086 | 5.09E-58 | 30 | PDGFA     | Immune-Neutrophil |
| 1.53E-32  | 0.55081368 | 0.888 | 0.564 | 5.17E-28 | 30 | DUSP1     | Immune-Neutrophil |
| 1.41E-89  | 0.54995826 | 0.388 | 0.075 | 4.74E-85 | 30 | SYNGR1    | Immune-Neutrophil |
| 9.09E-33  | 0.53992775 | 0.609 | 0.281 | 3.06E-28 | 30 | GDF15     | Immune-Neutrophil |
| 3.69E-35  | 0.53932133 | 0.765 | 0.402 | 1.24E-30 | 30 | HSPA8     | Immune-Neutrophil |
| 1.82E-40  | 0.53215209 | 0.391 | 0.129 | 6.12E-36 | 30 | DNAJB9    | Immune-Neutrophil |
| 3.46E-39  | 0.53091036 | 0.82  | 0.455 | 1.16E-34 | 30 | BTG1      | Immune-Neutrophil |
| 2.52E-28  | 0.52692721 | 0.908 | 0.644 | 8.51E-24 | 30 | ACTG1     | Immune-Neutrophil |
| 1.24E-40  | 0.52568315 | 0.636 | 0.284 | 4.18E-36 | 30 | C090498.  | Immune-Neutrophil |
| 1.99E-33  | 0.52427207 | 0.867 | 0.573 | 6.69E-29 | 30 | GSTP1     | Immune-Neutrophil |
| 2.61E-65  | 0.52348713 | 0.459 | 0.126 | 8.81E-61 | 30 | MYO9A     | Immune-Neutrophil |
| 9.18E-41  | 0.52254197 | 0.551 | 0.223 | 3.09E-36 | 30 | MAP1LC3B  | Immune-Neutrophil |
| 2.16E-35  | 0.52102721 | 0.929 | 0.672 | 7.29E-31 | 30 | EIF1      | Immune-Neutrophil |
| 1.84E-27  | 0.52031127 | 0.895 | 0.624 | 6.19E-23 | 30 | UBB       | Immune-Neutrophil |
| 2.37E-43  | 0.51846581 | 0.33  | 0.093 | 7.98E-39 | 30 | C1orf186  | Immune-Neutrophil |
| 1.69E-40  | 0.51680659 | 0.51  | 0.195 | 5.70E-36 | 30 | TLE4      | Immune-Neutrophil |
| 2.53E-36  | 0.51630262 | 0.585 | 0.269 | 8.53E-32 | 30 | SYNE2     | Immune-Neutrophil |
| 1.99E-51  | 0.51479795 | 0.306 | 0.074 | 6.71E-47 | 30 | SPX       | Immune-Neutrophil |
| 6.52E-96  | 0.51107343 | 0.333 | 0.054 | 2.20E-91 | 30 | HIST1H1E  | Immune-Neutrophil |
| 2.81E-31  | 0.50974242 | 0.636 | 0.312 | 9.47E-27 | 30 | NFKBIZ    | Immune-Neutrophil |
| 4.68E-148 | 0.50616381 | 0.313 | 0.034 | #####    | 30 | CDKL2     | Immune-Neutrophil |
| 1.15E-33  | 0.5059813  | 0.463 | 0.18  | 3.88E-29 | 30 | DDIT3     | Immune-Neutrophil |
| 1.34E-34  | 0.49885247 | 0.67  | 0.322 | 4.52E-30 | 30 | PNRC1     | Immune-Neutrophil |
| 3.60E-28  | 0.49855757 | 0.837 | 0.551 | 1.21E-23 | 30 | DDX5      | Immune-Neutrophil |
| 2.50E-35  | 0.49390156 | 0.925 | 0.601 | 8.43E-31 | 30 | FXVD2     | Immune-Neutrophil |
| 9.10E-105 | 0.49258005 | 0.255 | 0.031 | #####    | 30 | PRSS22    | Immune-Neutrophil |
| 4.36E-22  | 0.48721238 | 0.361 | 0.153 | 1.47E-17 | 30 | MRPL18    | Immune-Neutrophil |
| 5.33E-41  | 0.48537675 | 0.452 | 0.157 | 1.80E-36 | 30 | EMP1      | Immune-Neutrophil |
| 5.28E-31  | 0.48532796 | 0.942 | 0.682 | 1.78E-26 | 30 | SAT1      | Immune-Neutrophil |
| 1.26E-30  | 0.48397772 | 0.684 | 0.345 | 4.25E-26 | 30 | EPCAM     | Immune-Neutrophil |
| 2.96E-48  | 0.48309864 | 0.463 | 0.153 | 9.97E-44 | 30 | C14orf105 | Immune-Neutrophil |
| 1.40E-32  | 0.48257508 | 0.639 | 0.308 | 4.73E-28 | 30 | TRA2A     | Immune-Neutrophil |

|           |            |       |       |          |    |            |                   |
|-----------|------------|-------|-------|----------|----|------------|-------------------|
| 6.23E-51  | 0.47667117 | 0.412 | 0.121 | 2.10E-46 | 30 | DYNC2L1    | Immune-Neutrophil |
| 2.05E-35  | 0.47592947 | 0.548 | 0.232 | 6.92E-31 | 30 | STMN1      | Immune-Neutrophil |
| 6.63E-49  | 0.4720599  | 0.449 | 0.142 | 2.23E-44 | 30 | H1FX       | Immune-Neutrophil |
| 1.09E-82  | 0.47134729 | 0.364 | 0.071 | 3.67E-78 | 30 | CNP        | Immune-Neutrophil |
| 4.03E-29  | 0.46862374 | 0.786 | 0.453 | 1.36E-24 | 30 | MTNR2L1    | Immune-Neutrophil |
| 3.64E-99  | 0.46650335 | 0.31  | 0.046 | 1.23E-94 | 30 | CTTNBP2    | Immune-Neutrophil |
| 1.21E-21  | 0.46362487 | 0.779 | 0.486 | 4.09E-17 | 30 | HSPE1      | Immune-Neutrophil |
| 2.15E-29  | 0.46232799 | 0.571 | 0.276 | 7.26E-25 | 30 | LEPROT     | Immune-Neutrophil |
| 1.42E-38  | 0.46001576 | 0.626 | 0.276 | 4.78E-34 | 30 | AIF1L      | Immune-Neutrophil |
| 3.70E-132 | 0.45986205 | 0.299 | 0.034 | #####    | 30 | THSD4      | Immune-Neutrophil |
| 2.62E-26  | 0.45679919 | 0.704 | 0.407 | 8.82E-22 | 30 | CYSTM1     | Immune-Neutrophil |
| 2.75E-41  | 0.45606076 | 0.279 | 0.073 | 9.27E-37 | 30 | LPIN1      | Immune-Neutrophil |
| 4.42E-84  | 0.45586505 | 0.259 | 0.038 | 1.49E-79 | 30 | DR2A1-AS1  | Immune-Neutrophil |
| 1.15E-45  | 0.45433468 | 0.415 | 0.131 | 3.88E-41 | 30 | EPS8L2     | Immune-Neutrophil |
| 9.74E-49  | 0.45198622 | 0.371 | 0.105 | 3.28E-44 | 30 | HOXB6      | Immune-Neutrophil |
| 2.44E-24  | 0.45094762 | 0.524 | 0.26  | 8.24E-20 | 30 | BRD2       | Immune-Neutrophil |
| 4.64E-46  | 0.45015045 | 0.32  | 0.085 | 1.56E-41 | 30 | ARHGEF35   | Immune-Neutrophil |
| 1.20E-30  | 0.4483881  | 0.653 | 0.317 | 4.06E-26 | 30 | SQSTM1     | Immune-Neutrophil |
| 6.22E-36  | 0.44691831 | 0.517 | 0.207 | 2.10E-31 | 30 | EIF5A      | Immune-Neutrophil |
| 8.73E-24  | 0.44623252 | 0.452 | 0.209 | 2.94E-19 | 30 | KCNQ1OT1   | Immune-Neutrophil |
| 6.99E-31  | 0.44511044 | 0.558 | 0.248 | 2.36E-26 | 30 | TOB1       | Immune-Neutrophil |
| 2.58E-32  | 0.44262588 | 0.476 | 0.194 | 8.71E-28 | 30 | IFRD1      | Immune-Neutrophil |
| 1.52E-48  | 0.4410254  | 0.483 | 0.162 | 5.11E-44 | 30 | SYNE1      | Immune-Neutrophil |
| 4.32E-38  | 0.43724198 | 0.357 | 0.113 | 1.45E-33 | 30 | MYADM      | Immune-Neutrophil |
| 2.30E-32  | 0.43355457 | 0.507 | 0.216 | 7.76E-28 | 30 | HCFC1R1    | Immune-Neutrophil |
| 4.69E-33  | 0.43331279 | 0.517 | 0.218 | 1.58E-28 | 30 | XBP1       | Immune-Neutrophil |
| 9.41E-27  | 0.43281868 | 0.286 | 0.098 | 3.17E-22 | 30 | FAM53C     | Immune-Neutrophil |
| 1.64E-38  | 0.43101197 | 0.486 | 0.182 | 5.53E-34 | 30 | KIF12      | Immune-Neutrophil |
| 6.67E-30  | 0.42570261 | 0.286 | 0.091 | 2.25E-25 | 30 | P1-313I6.1 | Immune-Neutrophil |
| 5.56E-20  | 0.42414189 | 0.83  | 0.509 | 1.87E-15 | 30 | RHOB       | Immune-Neutrophil |
| 5.13E-22  | 0.42093811 | 0.874 | 0.615 | 1.73E-17 | 30 | RPL24      | Immune-Neutrophil |
| 2.77E-29  | 0.41993284 | 0.456 | 0.19  | 9.32E-25 | 30 | NAMPT      | Immune-Neutrophil |
| 1.25E-32  | 0.41918565 | 0.51  | 0.212 | 4.20E-28 | 30 | GSTM3      | Immune-Neutrophil |
| 1.40E-25  | 0.41907825 | 0.378 | 0.15  | 4.73E-21 | 30 | WEE1       | Immune-Neutrophil |
| 1.64E-30  | 0.41866268 | 0.633 | 0.307 | 5.52E-26 | 30 | SNHG8      | Immune-Neutrophil |
| 4.49E-97  | 0.41461903 | 0.323 | 0.05  | 1.51E-92 | 30 | HOXA10     | Immune-Neutrophil |
| 2.09E-55  | 0.41441158 | 0.33  | 0.078 | 7.05E-51 | 30 | HIST1H2AC  | Immune-Neutrophil |
| 7.35E-23  | 0.41073281 | 0.776 | 0.496 | 2.48E-18 | 30 | HNRNPA1    | Immune-Neutrophil |
| 1.67E-22  | 0.40995085 | 0.721 | 0.438 | 5.63E-18 | 30 | NPM1       | Immune-Neutrophil |
| 1.68E-48  | 0.40984112 | 0.269 | 0.061 | 5.68E-44 | 30 | ABHD5      | Immune-Neutrophil |
| 6.26E-24  | 0.4097306  | 0.68  | 0.392 | 2.11E-19 | 30 | RPS10      | Immune-Neutrophil |
| 1.82E-27  | 0.40938258 | 0.952 | 0.747 | 6.14E-23 | 30 | RPL7       | Immune-Neutrophil |
| 1.07E-28  | 0.40928103 | 0.707 | 0.364 | 3.61E-24 | 30 | SPINT2     | Immune-Neutrophil |
| 3.48E-25  | 0.40361335 | 0.748 | 0.447 | 1.17E-20 | 30 | EIF4A2     | Immune-Neutrophil |
| 2.13E-23  | 0.40270375 | 0.684 | 0.386 | 7.18E-19 | 30 | SRSF3      | Immune-Neutrophil |
| 6.31E-29  | 0.40040253 | 0.524 | 0.238 | 2.13E-24 | 30 | C6orf48    | Immune-Neutrophil |
| 1.47E-42  | 0.39961717 | 0.265 | 0.066 | 4.94E-38 | 30 | PHLDB1     | Immune-Neutrophil |
| 7.35E-25  | 0.39906263 | 0.33  | 0.125 | 2.47E-20 | 30 | BAG3       | Immune-Neutrophil |

|          |            |       |       |          |    |         |                   |
|----------|------------|-------|-------|----------|----|---------|-------------------|
| 7.56E-34 | 0.39831586 | 0.286 | 0.084 | 2.55E-29 | 30 | HES4    | Immune-Neutrophil |
| 4.52E-31 | 0.39784778 | 0.412 | 0.159 | 1.52E-26 | 30 | PARD6B  | Immune-Neutrophil |
| 9.77E-33 | 0.39768834 | 0.469 | 0.19  | 3.29E-28 | 30 | TAF7    | Immune-Neutrophil |
| 1.74E-21 | 0.39724931 | 0.568 | 0.301 | 5.85E-17 | 30 | FAM133B | Immune-Neutrophil |
| 1.03E-30 | 0.39711874 | 0.49  | 0.204 | 3.47E-26 | 30 | PTP4A1  | Immune-Neutrophil |
| 2.00E-16 | 0.39660052 | 0.799 | 0.534 | 6.74E-12 | 30 | KLF6    | Immune-Neutrophil |
| 1.07E-38 | 0.39627589 | 0.361 | 0.113 | 3.59E-34 | 30 | JAG1    | Immune-Neutrophil |
| 2.54E-34 | 0.3958901  | 0.527 | 0.221 | 8.57E-30 | 30 | YTHDC1  | Immune-Neutrophil |
| 9.99E-23 | 0.39410635 | 0.881 | 0.62  | 3.36E-18 | 30 | RPL14   | Immune-Neutrophil |
| 1.01E-24 | 0.39346817 | 0.721 | 0.394 | 3.40E-20 | 30 | SOX4    | Immune-Neutrophil |
| 4.31E-54 | 0.39251265 | 0.276 | 0.059 | 1.45E-49 | 30 | ANKRD37 | Immune-Neutrophil |
| 2.13E-32 | 0.39234341 | 0.422 | 0.159 | 7.19E-28 | 30 | PPP1R10 | Immune-Neutrophil |
| 2.15E-24 | 0.39174903 | 0.364 | 0.146 | 7.26E-20 | 30 | HN1     | Immune-Neutrophil |
| 2.57E-21 | 0.3916884  | 0.432 | 0.201 | 8.66E-17 | 30 | INTS6   | Immune-Neutrophil |
| 5.27E-35 | 0.39078183 | 0.588 | 0.251 | 1.78E-30 | 30 | SLC5A3  | Immune-Neutrophil |
| 1.76E-21 | 0.39011122 | 0.854 | 0.615 | 5.94E-17 | 30 | RPL5    | Immune-Neutrophil |
| 5.55E-21 | 0.38979621 | 0.531 | 0.268 | 1.87E-16 | 30 | MIDN    | Immune-Neutrophil |
| 2.48E-27 | 0.38764912 | 0.483 | 0.214 | 8.35E-23 | 30 | BCLAF1  | Immune-Neutrophil |
| 1.08E-38 | 0.38708184 | 0.49  | 0.183 | 3.62E-34 | 30 | ARRDC3  | Immune-Neutrophil |
| 9.74E-41 | 0.38689186 | 0.35  | 0.106 | 3.28E-36 | 30 | SNHG7   | Immune-Neutrophil |
| 4.65E-61 | 0.38661815 | 0.296 | 0.061 | 1.57E-56 | 30 | SGIP1   | Immune-Neutrophil |
| 1.90E-27 | 0.38420592 | 0.35  | 0.132 | 6.40E-23 | 30 | CCND1   | Immune-Neutrophil |
| 2.61E-24 | 0.38388523 | 0.622 | 0.33  | 8.78E-20 | 30 | FUS     | Immune-Neutrophil |
| 1.79E-21 | 0.38253361 | 0.605 | 0.323 | 6.03E-17 | 30 | SOD2    | Immune-Neutrophil |
| 7.79E-34 | 0.38158655 | 0.422 | 0.158 | 2.63E-29 | 30 | TALDO1  | Immune-Neutrophil |
| 3.27E-21 | 0.38076556 | 0.83  | 0.565 | 1.10E-16 | 30 | CIRBP   | Immune-Neutrophil |
| 6.62E-18 | 0.37982937 | 0.898 | 0.666 | 2.23E-13 | 30 | HSPB1   | Immune-Neutrophil |
| 2.18E-25 | 0.37953149 | 0.289 | 0.103 | 7.33E-21 | 30 | KDM6B   | Immune-Neutrophil |
| 2.72E-32 | 0.37881361 | 0.412 | 0.157 | 9.17E-28 | 30 | RSL1D1  | Immune-Neutrophil |
| 1.99E-20 | 0.37869997 | 0.735 | 0.45  | 6.72E-16 | 30 | BTF3    | Immune-Neutrophil |
| 1.97E-54 | 0.37862328 | 0.276 | 0.059 | 6.63E-50 | 30 | GALNT14 | Immune-Neutrophil |
| 3.91E-28 | 0.37295047 | 0.422 | 0.172 | 1.32E-23 | 30 | HMGB2   | Immune-Neutrophil |
| 1.93E-29 | 0.37250613 | 0.313 | 0.106 | 6.50E-25 | 30 | ZC3HAV1 | Immune-Neutrophil |
| 7.16E-47 | 0.37090644 | 0.337 | 0.09  | 2.41E-42 | 30 | TMEM38B | Immune-Neutrophil |
| 1.16E-36 | 0.36912823 | 0.381 | 0.127 | 3.91E-32 | 30 | UTRN    | Immune-Neutrophil |
| 1.95E-29 | 0.36900358 | 0.524 | 0.234 | 6.57E-25 | 30 | HNRNPA0 | Immune-Neutrophil |
| 2.09E-59 | 0.36754804 | 0.33  | 0.074 | 7.05E-55 | 30 | HOXA9   | Immune-Neutrophil |
| 3.43E-45 | 0.36717067 | 0.425 | 0.133 | 1.16E-40 | 30 | SKIL    | Immune-Neutrophil |
| 1.96E-23 | 0.36296535 | 0.435 | 0.2   | 6.61E-19 | 30 | CNDP2   | Immune-Neutrophil |
| 1.27E-38 | 0.3613524  | 0.378 | 0.122 | 4.28E-34 | 30 | COL4A2  | Immune-Neutrophil |
| 9.07E-25 | 0.36014486 | 0.5   | 0.237 | 3.06E-20 | 30 | BEX4    | Immune-Neutrophil |
| 1.53E-38 | 0.35952079 | 0.374 | 0.121 | 5.15E-34 | 30 | OXR1    | Immune-Neutrophil |
| 1.94E-34 | 0.35815248 | 0.327 | 0.102 | 6.55E-30 | 30 | DEPTOR  | Immune-Neutrophil |
| 2.36E-23 | 0.35699321 | 0.381 | 0.16  | 7.96E-19 | 30 | TGIF1   | Immune-Neutrophil |
| 1.74E-19 | 0.35693272 | 0.626 | 0.344 | 5.87E-15 | 30 | YBX3    | Immune-Neutrophil |
| 2.39E-39 | 0.3561173  | 0.408 | 0.135 | 8.05E-35 | 30 | IGFBP2  | Immune-Neutrophil |
| 3.11E-21 | 0.35601118 | 0.946 | 0.74  | 1.05E-16 | 30 | RPS3A   | Immune-Neutrophil |
| 1.70E-21 | 0.35582631 | 0.398 | 0.179 | 5.73E-17 | 30 | CDKN1A  | Immune-Neutrophil |

|           |            |       |       |          |    |          |                   |
|-----------|------------|-------|-------|----------|----|----------|-------------------|
| 2.55E-20  | 0.35577879 | 0.891 | 0.633 | 8.59E-16 | 30 | RPL18    | Immune-Neutrophil |
| 2.88E-28  | 0.3542491  | 0.983 | 0.921 | 9.69E-24 | 30 | EEF1A1   | Immune-Neutrophil |
| 1.11E-26  | 0.35127334 | 0.52  | 0.237 | 3.74E-22 | 30 | GABARAPL | Immune-Neutrophil |
| 4.51E-17  | 0.35117267 | 0.724 | 0.448 | 1.52E-12 | 30 | SLC25A6  | Immune-Neutrophil |
| 4.95E-25  | 0.35038511 | 0.32  | 0.12  | 1.67E-20 | 30 | MYLIP    | Immune-Neutrophil |
| 1.99E-35  | 0.34975773 | 0.31  | 0.093 | 6.69E-31 | 30 | KLF5     | Immune-Neutrophil |
| 1.62E-33  | 0.34912736 | 0.357 | 0.122 | 5.46E-29 | 30 | ILF3-AS1 | Immune-Neutrophil |
| 5.75E-300 | 0.34895556 | 0.34  | 0.02  | #####    | 30 | HBB      | Immune-Neutrophil |
| 4.54E-39  | 0.34883625 | 0.347 | 0.104 | 1.53E-34 | 30 | PDZK1    | Immune-Neutrophil |
| 4.36E-24  | 0.34858588 | 0.439 | 0.198 | 1.47E-19 | 30 | EIF3L    | Immune-Neutrophil |
| 1.66E-23  | 0.34846463 | 0.354 | 0.143 | 5.61E-19 | 30 | PCF11    | Immune-Neutrophil |
| 6.49E-23  | 0.34532603 | 0.503 | 0.246 | 2.19E-18 | 30 | RSRP1    | Immune-Neutrophil |
| 1.18E-45  | 0.34174104 | 0.347 | 0.096 | 3.96E-41 | 30 | HNF1B    | Immune-Neutrophil |
| 9.55E-72  | 0.34072439 | 0.262 | 0.043 | 3.22E-67 | 30 | HIST2H2B | Immune-Neutrophil |
| 2.62E-31  | 0.33805197 | 0.316 | 0.103 | 8.83E-27 | 30 | LBH      | Immune-Neutrophil |
| 6.67E-91  | 0.33786638 | 0.252 | 0.033 | 2.25E-86 | 30 | SIM2     | Immune-Neutrophil |
| 7.41E-42  | 0.33784942 | 0.35  | 0.101 | 2.50E-37 | 30 | S100A14  | Immune-Neutrophil |
| 3.83E-26  | 0.33744245 | 0.476 | 0.215 | 1.29E-21 | 30 | SNRPN    | Immune-Neutrophil |
| 9.20E-11  | 0.33572913 | 0.265 | 0.135 | 3.10E-06 | 30 | AKR1B1   | Immune-Neutrophil |
| 1.59E-18  | 0.33560719 | 0.929 | 0.713 | 5.37E-14 | 30 | RPL15    | Immune-Neutrophil |
| 4.08E-22  | 0.33560384 | 0.282 | 0.102 | 1.37E-17 | 30 | PCK1     | Immune-Neutrophil |
| 1.25E-46  | 0.33465756 | 0.279 | 0.066 | 4.22E-42 | 30 | SESN3    | Immune-Neutrophil |
| 2.23E-44  | 0.33309138 | 0.432 | 0.137 | 7.50E-40 | 30 | TBC1D4   | Immune-Neutrophil |
| 1.28E-20  | 0.33197107 | 0.52  | 0.262 | 4.32E-16 | 30 | DNAJB6   | Immune-Neutrophil |
| 4.84E-30  | 0.33116154 | 0.833 | 0.504 | 1.63E-25 | 30 | CLU      | Immune-Neutrophil |
| 2.04E-27  | 0.33110634 | 0.418 | 0.172 | 6.87E-23 | 30 | FARP1    | Immune-Neutrophil |
| 2.66E-62  | 0.33023923 | 0.282 | 0.055 | 8.95E-58 | 30 | PHGDH    | Immune-Neutrophil |
| 1.21E-21  | 0.32999439 | 0.633 | 0.338 | 4.09E-17 | 30 | SAP18    | Immune-Neutrophil |
| 1.01E-20  | 0.32865317 | 0.517 | 0.263 | 3.41E-16 | 30 | HIPK2    | Immune-Neutrophil |
| 2.31E-24  | 0.32863342 | 0.548 | 0.262 | 7.78E-20 | 30 | STAT3    | Immune-Neutrophil |
| 3.79E-25  | 0.32837723 | 0.272 | 0.094 | 1.28E-20 | 30 | RNASET2  | Immune-Neutrophil |
| 2.36E-34  | 0.32801013 | 0.364 | 0.122 | 7.94E-30 | 30 | INADL    | Immune-Neutrophil |
| 4.49E-15  | 0.32470776 | 0.276 | 0.122 | 1.51E-10 | 30 | CXCL2    | Immune-Neutrophil |
| 9.16E-20  | 0.32408352 | 0.633 | 0.352 | 3.09E-15 | 30 | VAMP2    | Immune-Neutrophil |
| 1.31E-16  | 0.32160024 | 0.255 | 0.106 | 4.41E-12 | 30 | C-444N24 | Immune-Neutrophil |
| 2.76E-15  | 0.31943977 | 0.844 | 0.599 | 9.29E-11 | 30 | RPL7A    | Immune-Neutrophil |
| 1.65E-31  | 0.31861786 | 0.367 | 0.13  | 5.55E-27 | 30 | CLSTN1   | Immune-Neutrophil |
| 5.38E-30  | 0.31754706 | 0.31  | 0.104 | 1.81E-25 | 30 | EIF4A3   | Immune-Neutrophil |
| 5.42E-40  | 0.3160757  | 0.374 | 0.117 | 1.83E-35 | 30 | ZCCHC11  | Immune-Neutrophil |
| 4.29E-25  | 0.31606597 | 0.255 | 0.083 | 1.45E-20 | 30 | S100A1   | Immune-Neutrophil |
| 4.14E-26  | 0.31386881 | 0.497 | 0.221 | 1.40E-21 | 30 | DMKN     | Immune-Neutrophil |
| 1.39E-28  | 0.31355293 | 0.395 | 0.152 | 4.68E-24 | 30 | ADAM10   | Immune-Neutrophil |
| 2.66E-23  | 0.31342015 | 0.432 | 0.194 | 8.97E-19 | 30 | BAG1     | Immune-Neutrophil |
| 1.30E-36  | 0.31289233 | 0.316 | 0.095 | 4.38E-32 | 30 | HOXB2    | Immune-Neutrophil |
| 3.79E-35  | 0.31137928 | 0.405 | 0.143 | 1.28E-30 | 30 | FAM60A   | Immune-Neutrophil |
| 2.61E-22  | 0.31007429 | 0.486 | 0.232 | 8.78E-18 | 30 | CFDP1    | Immune-Neutrophil |
| 2.43E-15  | 0.30887431 | 0.857 | 0.635 | 8.19E-11 | 30 | RPL10A   | Immune-Neutrophil |
| 2.45E-21  | 0.30869334 | 0.415 | 0.188 | 8.27E-17 | 30 | RARRES2  | Immune-Neutrophil |

|          |            |       |       |          |    |          |                   |
|----------|------------|-------|-------|----------|----|----------|-------------------|
| 1.32E-18 | 0.30846739 | 0.694 | 0.403 | 4.44E-14 | 30 | RBM39    | Immune-Neutrophil |
| 1.81E-34 | 0.30802262 | 0.344 | 0.11  | 6.12E-30 | 30 | FAM84B   | Immune-Neutrophil |
| 3.65E-30 | 0.3067808  | 0.35  | 0.124 | 1.23E-25 | 30 | LBR      | Immune-Neutrophil |
| 8.32E-30 | 0.30633584 | 0.361 | 0.13  | 2.80E-25 | 30 | UXS1     | Immune-Neutrophil |
| 5.48E-30 | 0.30577076 | 0.296 | 0.095 | 1.85E-25 | 30 | TSPYL2   | Immune-Neutrophil |
| 5.73E-32 | 0.30312015 | 0.344 | 0.115 | 1.93E-27 | 30 | HOTAIRM1 | Immune-Neutrophil |
| 1.47E-16 | 0.30244802 | 0.898 | 0.67  | 4.95E-12 | 30 | RPS9     | Immune-Neutrophil |
| 3.12E-48 | 0.30196798 | 0.276 | 0.063 | 1.05E-43 | 30 | HOXA5    | Immune-Neutrophil |
| 1.84E-30 | 0.29972072 | 0.388 | 0.142 | 6.20E-26 | 30 | HSPA2    | Immune-Neutrophil |
| 6.20E-22 | 0.29924542 | 0.391 | 0.171 | 2.09E-17 | 30 | CAT      | Immune-Neutrophil |
| 4.59E-15 | 0.2988224  | 0.748 | 0.483 | 1.55E-10 | 30 | RPSA     | Immune-Neutrophil |
| 2.66E-22 | 0.29859908 | 0.575 | 0.295 | 8.96E-18 | 30 | DYNLRB1  | Immune-Neutrophil |
| 2.50E-23 | 0.29420808 | 0.364 | 0.148 | 8.41E-19 | 30 | ABPB1-AS | Immune-Neutrophil |
| 5.30E-18 | 0.2924474  | 0.789 | 0.49  | 1.79E-13 | 30 | RPLP0    | Immune-Neutrophil |
| 1.76E-25 | 0.29236389 | 0.395 | 0.16  | 5.92E-21 | 30 | TSPAN12  | Immune-Neutrophil |
| 1.13E-19 | 0.29219195 | 0.323 | 0.134 | 3.82E-15 | 30 | HOXB7    | Immune-Neutrophil |
| 3.49E-16 | 0.29061031 | 0.85  | 0.595 | 1.17E-11 | 30 | PPDPF    | Immune-Neutrophil |
| 1.24E-15 | 0.29021286 | 0.731 | 0.444 | 4.19E-11 | 30 | PRDX1    | Immune-Neutrophil |
| 2.95E-37 | 0.28982393 | 0.306 | 0.089 | 9.96E-33 | 30 | P3H2     | Immune-Neutrophil |
| 8.68E-17 | 0.28965749 | 0.486 | 0.255 | 2.92E-12 | 30 | SLC38A2  | Immune-Neutrophil |
| 4.57E-20 | 0.28946565 | 0.544 | 0.27  | 1.54E-15 | 30 | KRT8     | Immune-Neutrophil |
| 3.20E-28 | 0.28904613 | 0.418 | 0.166 | 1.08E-23 | 30 | NTN4     | Immune-Neutrophil |
| 1.87E-22 | 0.2885921  | 0.548 | 0.266 | 6.31E-18 | 30 | EIF5     | Immune-Neutrophil |
| 9.70E-23 | 0.28815046 | 0.541 | 0.269 | 3.27E-18 | 30 | GLTSCR2  | Immune-Neutrophil |
| 4.08E-17 | 0.28682214 | 0.823 | 0.538 | 1.37E-12 | 30 | NGFRAP1  | Immune-Neutrophil |
| 4.68E-54 | 0.28446536 | 0.31  | 0.07  | 1.58E-49 | 30 | CHL1     | Immune-Neutrophil |
| 1.37E-20 | 0.2839736  | 0.435 | 0.203 | 4.63E-16 | 30 | EIF4A1   | Immune-Neutrophil |
| 2.74E-23 | 0.28373705 | 0.255 | 0.087 | 9.24E-19 | 30 | ELMSAN1  | Immune-Neutrophil |
| 3.23E-28 | 0.28327653 | 0.327 | 0.115 | 1.09E-23 | 30 | ZBTB16   | Immune-Neutrophil |
| 2.39E-23 | 0.28242744 | 0.255 | 0.086 | 8.06E-19 | 30 | AFMID    | Immune-Neutrophil |
| 2.44E-32 | 0.28169166 | 0.313 | 0.099 | 8.23E-28 | 30 | MTSS1    | Immune-Neutrophil |
| 5.01E-18 | 0.27932273 | 0.514 | 0.268 | 1.69E-13 | 30 | MPC2     | Immune-Neutrophil |
| 2.53E-13 | 0.27930944 | 0.524 | 0.305 | 8.54E-09 | 30 | IER3     | Immune-Neutrophil |
| 8.82E-16 | 0.27929078 | 0.949 | 0.771 | 2.97E-11 | 30 | RPS24    | Immune-Neutrophil |
| 4.22E-23 | 0.27897939 | 0.337 | 0.134 | 1.42E-18 | 30 | TOR1AIP2 | Immune-Neutrophil |
| 4.84E-23 | 0.27484758 | 0.425 | 0.188 | 1.63E-18 | 30 | ARHGAP24 | Immune-Neutrophil |
| 4.83E-28 | 0.27467195 | 0.262 | 0.082 | 1.63E-23 | 30 | MLF1     | Immune-Neutrophil |
| 3.88E-19 | 0.27306555 | 0.293 | 0.12  | 1.31E-14 | 30 | SERPINB1 | Immune-Neutrophil |
| 1.70E-32 | 0.27281143 | 0.299 | 0.093 | 5.74E-28 | 30 | CREG1    | Immune-Neutrophil |
| 3.37E-14 | 0.27179336 | 0.765 | 0.504 | 1.14E-09 | 30 | NACA     | Immune-Neutrophil |
| 9.65E-22 | 0.27132252 | 0.418 | 0.187 | 3.25E-17 | 30 | LRPAP1   | Immune-Neutrophil |
| 1.63E-24 | 0.27090397 | 0.252 | 0.083 | 5.50E-20 | 30 | RORA     | Immune-Neutrophil |
| 2.08E-14 | 0.26770154 | 0.898 | 0.732 | 7.02E-10 | 30 | RPL6     | Immune-Neutrophil |
| 1.19E-11 | 0.26727807 | 0.782 | 0.556 | 3.99E-07 | 30 | GNB2L1   | Immune-Neutrophil |
| 7.74E-31 | 0.26640349 | 0.306 | 0.098 | 2.61E-26 | 30 | WDR60    | Immune-Neutrophil |
| 6.04E-13 | 0.26639519 | 1     | 0.999 | 2.04E-08 | 30 | MALAT1   | Immune-Neutrophil |
| 3.32E-13 | 0.26612966 | 0.895 | 0.661 | 1.12E-08 | 30 | RPS3     | Immune-Neutrophil |
| 1.96E-11 | 0.2653643  | 0.782 | 0.543 | 6.60E-07 | 30 | ZFP36L1  | Immune-Neutrophil |

|           |            |       |       |          |    |          |                   |
|-----------|------------|-------|-------|----------|----|----------|-------------------|
| 1.01E-19  | 0.26504661 | 0.49  | 0.24  | 3.39E-15 | 30 | C7orf73  | Immune-Neutrophil |
| 9.67E-12  | 0.26472883 | 0.898 | 0.683 | 3.26E-07 | 30 | RPS20    | Immune-Neutrophil |
| 2.67E-29  | 0.2646136  | 0.265 | 0.08  | 8.99E-25 | 30 | ARG2     | Immune-Neutrophil |
| 2.19E-34  | 0.26435973 | 0.31  | 0.093 | 7.37E-30 | 30 | RB1CC1   | Immune-Neutrophil |
| 1.25E-25  | 0.26369419 | 0.384 | 0.154 | 4.23E-21 | 30 | ANP32E   | Immune-Neutrophil |
| 3.01E-14  | 0.2636497  | 0.84  | 0.624 | 1.02E-09 | 30 | RPS21    | Immune-Neutrophil |
| 1.45E-28  | 0.26269193 | 0.269 | 0.085 | 4.90E-24 | 30 | IMMP2L   | Immune-Neutrophil |
| 1.30E-16  | 0.26211748 | 0.296 | 0.127 | 4.39E-12 | 30 | SERPINA1 | Immune-Neutrophil |
| 1.76E-19  | 0.2613598  | 0.473 | 0.229 | 5.91E-15 | 30 | TUBB4B   | Immune-Neutrophil |
| 6.07E-19  | 0.26125033 | 0.432 | 0.206 | 2.05E-14 | 30 | ATRAID   | Immune-Neutrophil |
| 9.08E-25  | 0.2603765  | 0.357 | 0.139 | 3.06E-20 | 30 | HNMT     | Immune-Neutrophil |
| 1.95E-13  | 0.26031165 | 0.939 | 0.764 | 6.56E-09 | 30 | RPL35A   | Immune-Neutrophil |
| 8.96E-28  | 0.26023815 | 0.378 | 0.144 | 3.02E-23 | 30 | ACAA2    | Immune-Neutrophil |
| 1.16E-21  | 0.2598929  | 0.412 | 0.182 | 3.90E-17 | 30 | PKHD1    | Immune-Neutrophil |
| 1.22E-34  | 0.25925329 | 0.286 | 0.083 | 4.11E-30 | 30 | FRMD4A   | Immune-Neutrophil |
| 3.77E-17  | 0.25923768 | 0.969 | 0.846 | 1.27E-12 | 30 | RPS6     | Immune-Neutrophil |
| 6.94E-30  | 0.25916117 | 0.286 | 0.09  | 2.34E-25 | 30 | GNAI1    | Immune-Neutrophil |
| 8.49E-26  | 0.25896802 | 0.265 | 0.088 | 2.86E-21 | 30 | HTATSF1  | Immune-Neutrophil |
| 3.58E-23  | 0.25872309 | 0.313 | 0.119 | 1.21E-18 | 30 | FKBP4    | Immune-Neutrophil |
| 2.72E-27  | 0.2583674  | 0.299 | 0.102 | 9.16E-23 | 30 | NFATC3   | Immune-Neutrophil |
| 9.69E-14  | 0.25836251 | 0.803 | 0.541 | 3.26E-09 | 30 | NRNPA2B  | Immune-Neutrophil |
| 1.37E-31  | 0.25805516 | 0.269 | 0.079 | 4.61E-27 | 30 | SMD5-AS1 | Immune-Neutrophil |
| 4.21E-13  | 0.25767855 | 0.925 | 0.721 | 1.42E-08 | 30 | RPL27A   | Immune-Neutrophil |
| 1.87E-12  | 0.25752892 | 0.874 | 0.63  | 6.30E-08 | 30 | RPS7     | Immune-Neutrophil |
| 1.30E-18  | 0.25751076 | 0.541 | 0.281 | 4.39E-14 | 30 | COBLL1   | Immune-Neutrophil |
| 2.14E-23  | 0.25595116 | 0.531 | 0.253 | 7.20E-19 | 30 | GPBP1    | Immune-Neutrophil |
| 1.47E-18  | 0.25547341 | 0.677 | 0.39  | 4.97E-14 | 30 | HMG2     | Immune-Neutrophil |
| 7.25E-18  | 0.25200548 | 0.391 | 0.183 | 2.44E-13 | 30 | AFF4     | Immune-Neutrophil |
| 7.72E-19  | 0.25195182 | 0.405 | 0.187 | 2.60E-14 | 30 | ALKBH7   | Immune-Neutrophil |
| 2.20E-22  | 0.25094039 | 0.578 | 0.282 | 7.40E-18 | 30 | IVNS1ABP | Immune-Neutrophil |
| 7.55E-23  | 0.25088198 | 0.282 | 0.104 | 2.55E-18 | 30 | B41L4A-A | Immune-Neutrophil |
| 4.12E-178 | 2.11018073 | 0.947 | 0.309 | #####    | 31 | LGALS1   | Immune-B cells    |
| 6.71E-299 | 2.04610874 | 0.961 | 0.184 | #####    | 31 | SPARC    | Immune-B cells    |
| 1.36E-270 | 2.01300937 | 0.954 | 0.203 | #####    | 31 | GNG11    | Immune-B cells    |
| 0         | 1.98893678 | 0.826 | 0.075 | 0        | 31 | RGCC     | Immune-B cells    |
| 0         | 1.94507294 | 0.642 | 0.022 | 0        | 31 | ESM1     | Immune-B cells    |
| 0         | 1.84955855 | 0.897 | 0.101 | 0        | 31 | HSPG2    | Immune-B cells    |
| 0         | 1.83809463 | 0.812 | 0.047 | 0        | 31 | CLDN5    | Immune-B cells    |
| 0         | 1.68261454 | 0.809 | 0.074 | 0        | 31 | CAV1     | Immune-B cells    |
| 0         | 1.65797733 | 0.762 | 0.023 | 0        | 31 | VWF      | Immune-B cells    |
| 0         | 1.63361762 | 0.578 | 0.011 | 0        | 31 | APLN     | Immune-B cells    |
| 0         | 1.62147505 | 0.865 | 0.123 | 0        | 31 | COL4A1   | Immune-B cells    |
| 0         | 1.60882523 | 0.929 | 0.129 | 0        | 31 | TM4SF1   | Immune-B cells    |
| 1.57E-120 | 1.59074057 | 1     | 0.808 | #####    | 31 | TMSB4X   | Immune-B cells    |
| 1.84E-160 | 1.52034691 | 0.957 | 0.303 | #####    | 31 | VIM      | Immune-B cells    |
| 1.74E-248 | 1.50803285 | 0.752 | 0.112 | #####    | 31 | SPARCL1  | Immune-B cells    |
| 0         | 1.50298287 | 0.851 | 0.101 | 0        | 31 | CCDC85B  | Immune-B cells    |
| 0         | 1.49160181 | 0.879 | 0.058 | 0        | 31 | PECAM1   | Immune-B cells    |

|           |            |       |       |          |    |          |                |
|-----------|------------|-------|-------|----------|----|----------|----------------|
| 3.82E-172 | 1.48876266 | 0.957 | 0.321 | #####    | 31 | FKBP1A   | Immune-B cells |
| 1.42E-252 | 1.47993324 | 0.844 | 0.141 | #####    | 31 | CTGF     | Immune-B cells |
| 0         | 1.47927115 | 0.84  | 0.068 | 0        | 31 | RAMP2    | Immune-B cells |
| 0         | 1.45397708 | 0.791 | 0.044 | 0        | 31 | CD93     | Immune-B cells |
| 0         | 1.43139622 | 0.844 | 0.096 | 0        | 31 | TCF4     | Immune-B cells |
| 0         | 1.42830038 | 0.709 | 0.053 | 0        | 31 | FN1      | Immune-B cells |
| 3.22E-116 | 1.42184795 | 0.965 | 0.448 | #####    | 31 | CALM1    | Immune-B cells |
| 1.11E-153 | 1.40065104 | 0.89  | 0.242 | #####    | 31 | IL32     | Immune-B cells |
| 0         | 1.38974289 | 0.879 | 0.087 | 0        | 31 | RNASE1   | Immune-B cells |
| 0         | 1.36833141 | 0.72  | 0.024 | 0        | 31 | PLVAP    | Immune-B cells |
| 2.75E-302 | 1.35892175 | 0.823 | 0.119 | #####    | 31 | COL4A2   | Immune-B cells |
| 1.32E-268 | 1.35560379 | 0.904 | 0.157 | #####    | 31 | SPRY1    | Immune-B cells |
| 0         | 1.34510304 | 0.798 | 0.066 | 0        | 31 | ENG      | Immune-B cells |
| 0         | 1.33505026 | 0.805 | 0.052 | 0        | 31 | PCAT19   | Immune-B cells |
| 9.29E-136 | 1.32834153 | 0.979 | 0.439 | #####    | 31 | MYL12A   | Immune-B cells |
| 5.15E-204 | 1.32573304 | 0.911 | 0.213 | #####    | 31 | GSN      | Immune-B cells |
| 6.98E-218 | 1.31081495 | 0.855 | 0.165 | #####    | 31 | ID3      | Immune-B cells |
| 0         | 1.29701793 | 0.798 | 0.07  | 0        | 31 | VWA1     | Immune-B cells |
| 1.28E-228 | 1.29239344 | 0.908 | 0.169 | #####    | 31 | IFI27    | Immune-B cells |
| 0         | 1.2592647  | 0.713 | 0.054 | 0        | 31 | TM4SF18  | Immune-B cells |
| 1.15E-123 | 1.25362579 | 0.993 | 0.705 | #####    | 31 | IGFBP7   | Immune-B cells |
| 2.18E-128 | 1.24636169 | 0.989 | 0.503 | #####    | 31 | HLA-A    | Immune-B cells |
| 5.78E-268 | 1.23603907 | 0.709 | 0.096 | #####    | 31 | GYPC     | Immune-B cells |
| 5.10E-238 | 1.2290582  | 0.741 | 0.116 | #####    | 31 | C10orf10 | Immune-B cells |
| 4.19E-113 | 1.19648959 | 0.957 | 0.479 | #####    | 31 | PFN1     | Immune-B cells |
| 0         | 1.18661106 | 0.663 | 0.019 | 0        | 31 | CLEC14A  | Immune-B cells |
| 0         | 1.18423385 | 0.663 | 0.023 | 0        | 31 | ECSCR.1  | Immune-B cells |
| 3.07E-254 | 1.18408127 | 0.826 | 0.131 | #####    | 31 | VAMP5    | Immune-B cells |
| 2.05E-120 | 1.17408477 | 0.986 | 0.457 | #####    | 31 | IFITM3   | Immune-B cells |
| 0         | 1.15232272 | 0.745 | 0.066 | 0        | 31 | GMFG     | Immune-B cells |
| 0         | 1.14903451 | 0.39  | 0.021 | 0        | 31 | PGF      | Immune-B cells |
| 0         | 1.1430787  | 0.582 | 0.013 | 0        | 31 | COL15A1  | Immune-B cells |
| 0         | 1.13749921 | 0.677 | 0.039 | 0        | 31 | ADGRL4   | Immune-B cells |
| 0         | 1.1323597  | 0.777 | 0.082 | 0        | 31 | EGFL7    | Immune-B cells |
| 2.52E-114 | 1.12814599 | 0.961 | 0.463 | #####    | 31 | MYL12B   | Immune-B cells |
| 2.36E-157 | 1.12403777 | 0.918 | 0.265 | #####    | 31 | TAGLN2   | Immune-B cells |
| 5.84E-127 | 1.12364804 | 1     | 0.892 | #####    | 31 | B2M      | Immune-B cells |
| 0         | 1.11825366 | 0.706 | 0.039 | 0        | 31 | CD34     | Immune-B cells |
| 8.87E-157 | 1.11223752 | 0.943 | 0.272 | #####    | 31 | CRIP2    | Immune-B cells |
| 0         | 1.10438368 | 0.702 | 0.044 | 0        | 31 | ICAM2    | Immune-B cells |
| 6.92E-122 | 1.09576598 | 0.929 | 0.328 | #####    | 31 | ANXA2    | Immune-B cells |
| 1.11E-202 | 1.09532471 | 0.553 | 0.074 | #####    | 31 | EDN1     | Immune-B cells |
| 0         | 1.08925744 | 0.493 | 0.021 | 0        | 31 | ANGPT2   | Immune-B cells |
| 8.18E-241 | 1.0806659  | 0.805 | 0.136 | #####    | 31 | CD99     | Immune-B cells |
| 1.37E-92  | 1.07896713 | 0.514 | 0.117 | 4.61E-88 | 31 | CCL2     | Immune-B cells |
| 2.60E-105 | 1.07048843 | 0.989 | 0.632 | #####    | 31 | MYL6     | Immune-B cells |
| 4.40E-223 | 1.06063785 | 0.801 | 0.139 | #####    | 31 | PTRF     | Immune-B cells |
| 1.66E-99  | 1.03369095 | 0.996 | 0.808 | 5.60E-95 | 31 | ACTB     | Immune-B cells |

|           |            |       |       |          |    |          |                |
|-----------|------------|-------|-------|----------|----|----------|----------------|
| 2.10E-262 | 1.03006519 | 0.642 | 0.079 | #####    | 31 | RGS3     | Immune-B cells |
| 1.93E-109 | 1.02992765 | 0.95  | 0.397 | #####    | 31 | CD59     | Immune-B cells |
| 1.06E-154 | 1.01706058 | 0.876 | 0.23  | #####    | 31 | RHOC     | Immune-B cells |
| 4.75E-218 | 0.99289244 | 0.695 | 0.102 | #####    | 31 | A2M      | Immune-B cells |
| 1.56E-134 | 0.99006224 | 0.858 | 0.238 | #####    | 31 | ATP1B3   | Immune-B cells |
| 1.25E-97  | 0.98629401 | 0.965 | 0.467 | 4.20E-93 | 31 | CFL1     | Immune-B cells |
| 0         | 0.97239584 | 0.663 | 0.057 | 0        | 31 | CALCRL   | Immune-B cells |
| 1.01E-223 | 0.97082905 | 0.702 | 0.107 | #####    | 31 | PRKCDBP  | Immune-B cells |
| 1.03E-82  | 0.9673763  | 0.649 | 0.183 | 3.47E-78 | 31 | MGP      | Immune-B cells |
| 0         | 0.96595465 | 0.67  | 0.065 | 0        | 31 | SDPR     | Immune-B cells |
| 3.29E-142 | 0.9641065  | 0.801 | 0.196 | #####    | 31 | TPM4     | Immune-B cells |
| 8.74E-244 | 0.9609229  | 0.72  | 0.101 | #####    | 31 | IGFBP4   | Immune-B cells |
| 0         | 0.95766735 | 0.521 | 0.012 | 0        | 31 | LAMA4    | Immune-B cells |
| 1.67E-173 | 0.951341   | 0.826 | 0.183 | #####    | 31 | S100A16  | Immune-B cells |
| 7.40E-85  | 0.94665445 | 0.961 | 0.521 | 2.49E-80 | 31 | S100A10  | Immune-B cells |
| 5.86E-126 | 0.94636466 | 0.947 | 0.307 | #####    | 31 | IFITM2   | Immune-B cells |
| 0         | 0.93865845 | 0.667 | 0.06  | 0        | 31 | ESAM     | Immune-B cells |
| 2.81E-203 | 0.93777006 | 0.727 | 0.126 | #####    | 31 | GNAI2    | Immune-B cells |
| 1.02E-90  | 0.92964051 | 0.996 | 0.799 | 3.45E-86 | 31 | TMSB10   | Immune-B cells |
| 1.51E-115 | 0.92849484 | 0.738 | 0.192 | #####    | 31 | DDIT4    | Immune-B cells |
| 4.09E-13  | 0.92672837 | 0.33  | 0.163 | 1.38E-08 | 31 | SLPI     | Immune-B cells |
| 4.47E-88  | 0.91348652 | 0.989 | 0.666 | 1.51E-83 | 31 | HSPB1    | Immune-B cells |
| 1.49E-140 | 0.90919791 | 0.762 | 0.184 | #####    | 31 | MGST2    | Immune-B cells |
| 0         | 0.90604303 | 0.5   | 0.019 | 0        | 31 | SERPINE1 | Immune-B cells |
| 4.19E-162 | 0.90484241 | 0.745 | 0.149 | #####    | 31 | CLIC4    | Immune-B cells |
| 7.44E-147 | 0.89589755 | 0.84  | 0.21  | #####    | 31 | MYH9     | Immune-B cells |
| 8.29E-140 | 0.89221422 | 0.819 | 0.199 | #####    | 31 | RPS4Y1   | Immune-B cells |
| 4.04E-138 | 0.88770323 | 0.78  | 0.18  | #####    | 31 | KLF2     | Immune-B cells |
| 2.73E-253 | 0.87819933 | 0.674 | 0.087 | #####    | 31 | NPDC1    | Immune-B cells |
| 0         | 0.86591046 | 0.592 | 0.041 | 0        | 31 | NOTCH4   | Immune-B cells |
| 2.63E-80  | 0.86577913 | 0.989 | 0.643 | 8.87E-76 | 31 | ACTG1    | Immune-B cells |
| 6.60E-188 | 0.86561302 | 0.72  | 0.129 | #####    | 31 | MARCKSL1 | Immune-B cells |
| 7.95E-87  | 0.85340631 | 0.975 | 0.556 | 2.68E-82 | 31 | GAPDH    | Immune-B cells |
| 4.36E-129 | 0.85008933 | 0.78  | 0.189 | #####    | 31 | ID1      | Immune-B cells |
| 5.86E-106 | 0.84895989 | 0.869 | 0.283 | #####    | 31 | H2AFZ    | Immune-B cells |
| 0         | 0.84543168 | 0.518 | 0.026 | 0        | 31 | ROBO4    | Immune-B cells |
| 5.50E-198 | 0.83752468 | 0.663 | 0.102 | #####    | 31 | IFI16    | Immune-B cells |
| 3.19E-154 | 0.82996612 | 0.787 | 0.175 | #####    | 31 | SEC14L1  | Immune-B cells |
| 0         | 0.82975383 | 0.585 | 0.052 | 0        | 31 | GIMAP7   | Immune-B cells |
| 2.58E-140 | 0.82193756 | 0.77  | 0.176 | #####    | 31 | MARCKS   | Immune-B cells |
| 1.33E-97  | 0.81737067 | 1     | 0.861 | 4.47E-93 | 31 | RPL10    | Immune-B cells |
| 0         | 0.81547556 | 0.525 | 0.023 | 0        | 31 | CDH5     | Immune-B cells |
| 2.28E-82  | 0.81186486 | 0.989 | 0.669 | 7.67E-78 | 31 | RPS2     | Immune-B cells |
| 1.52E-274 | 0.80880278 | 0.642 | 0.074 | #####    | 31 | HYAL2    | Immune-B cells |
| 0         | 0.80393162 | 0.553 | 0.034 | 0        | 31 | CLEC2B   | Immune-B cells |
| 8.59E-101 | 0.80282092 | 0.887 | 0.307 | 2.89E-96 | 31 | SH3BGR1  | Immune-B cells |
| 1.60E-85  | 0.80105899 | 0.972 | 0.458 | 5.38E-81 | 31 | HLA-C    | Immune-B cells |
| 3.24E-07  | 0.78521804 | 0.78  | 0.588 | 0.01093  | 31 | SPP1     | Immune-B cells |

|           |            |       |       |          |    |          |                |
|-----------|------------|-------|-------|----------|----|----------|----------------|
| 0         | 0.78450265 | 0.557 | 0.042 | 0        | 31 | GIMAP4   | Immune-B cells |
| 2.24E-103 | 0.78077351 | 0.996 | 0.903 | 7.56E-99 | 31 | PTMA     | Immune-B cells |
| 4.19E-124 | 0.77872554 | 0.83  | 0.228 | #####    | 31 | MSN      | Immune-B cells |
| 0         | 0.77796689 | 0.479 | 0.021 | 0        | 31 | MYCT1    | Immune-B cells |
| 3.17E-168 | 0.77408611 | 0.631 | 0.106 | #####    | 31 | ARHGDIB  | Immune-B cells |
| 0         | 0.77278801 | 0.496 | 0.026 | 0        | 31 | PALMD    | Immune-B cells |
| 0         | 0.7674601  | 0.482 | 0.036 | 0        | 31 | NUAK1    | Immune-B cells |
| 7.78E-114 | 0.7569417  | 0.688 | 0.168 | #####    | 31 | TUBA1A   | Immune-B cells |
| 0         | 0.74827996 | 0.465 | 0.024 | 0        | 31 | FAM167B  | Immune-B cells |
| 1.70E-69  | 0.74475875 | 0.975 | 0.508 | 5.74E-65 | 31 | HLA-B    | Immune-B cells |
| 7.25E-106 | 0.74165241 | 0.777 | 0.211 | #####    | 31 | ANXA1    | Immune-B cells |
| 1.08E-149 | 0.73986624 | 0.323 | 0.034 | #####    | 31 | FABP5    | Immune-B cells |
| 4.72E-253 | 0.73889787 | 0.472 | 0.043 | #####    | 31 | MCAM     | Immune-B cells |
| 0         | 0.73874428 | 0.44  | 0.01  | 0        | 31 | CXorf36  | Immune-B cells |
| 8.80E-79  | 0.73872153 | 0.794 | 0.275 | 2.97E-74 | 31 | TUBA1B   | Immune-B cells |
| 1.56E-142 | 0.73531159 | 0.684 | 0.142 | #####    | 31 | INC00152 | Immune-B cells |
| 0         | 0.72752214 | 0.365 | 0.013 | 0        | 31 | TNFRSF4  | Immune-B cells |
| 1.56E-102 | 0.72671956 | 0.521 | 0.11  | 5.24E-98 | 31 | ADM      | Immune-B cells |
| 5.77E-68  | 0.7261432  | 0.986 | 0.66  | 1.95E-63 | 31 | RPS3     | Immune-B cells |
| 1.14E-195 | 0.72437964 | 0.592 | 0.082 | #####    | 31 | SH3BP5   | Immune-B cells |
| 0         | 0.72344269 | 0.436 | 0.018 | 0        | 31 | FSCN1    | Immune-B cells |
| 8.38E-272 | 0.72124241 | 0.482 | 0.042 | #####    | 31 | RAMP3    | Immune-B cells |
| 1.81E-75  | 0.71752361 | 0.986 | 0.757 | 6.09E-71 | 31 | RPL3     | Immune-B cells |
| 2.77E-115 | 0.71555172 | 0.872 | 0.246 | #####    | 31 | CALD1    | Immune-B cells |
| 6.57E-80  | 0.71044151 | 0.989 | 0.669 | 2.21E-75 | 31 | RPS9     | Immune-B cells |
| 0         | 0.70131871 | 0.454 | 0.024 | 0        | 31 | FAM101B  | Immune-B cells |
| 7.73E-83  | 0.69976586 | 0.596 | 0.167 | 2.61E-78 | 31 | PRCP     | Immune-B cells |
| 3.58E-112 | 0.69949884 | 0.677 | 0.167 | #####    | 31 | ARPC1B   | Immune-B cells |
| 9.08E-139 | 0.69800162 | 0.649 | 0.134 | #####    | 31 | FDPS     | Immune-B cells |
| 3.18E-180 | 0.6979732  | 0.574 | 0.084 | #####    | 31 | ISG15    | Immune-B cells |
| 5.59E-260 | 0.69349752 | 0.45  | 0.038 | #####    | 31 | TMEM88   | Immune-B cells |
| 3.87E-130 | 0.69214141 | 0.578 | 0.112 | #####    | 31 | PRSS23   | Immune-B cells |
| 7.12E-92  | 0.68188656 | 0.801 | 0.258 | 2.40E-87 | 31 | ANXA5    | Immune-B cells |
| 0         | 0.67943573 | 0.422 | 0.025 | 0        | 31 | FAM198B  | Immune-B cells |
| 1.64E-141 | 0.67840028 | 0.78  | 0.173 | #####    | 31 | MYL9     | Immune-B cells |
| 6.48E-80  | 0.67445906 | 0.901 | 0.347 | 2.18E-75 | 31 | GUK1     | Immune-B cells |
| 4.69E-81  | 0.67328362 | 0.904 | 0.343 | 1.58E-76 | 31 | HLA-E    | Immune-B cells |
| 2.73E-136 | 0.66793273 | 0.45  | 0.069 | #####    | 31 | MPZL2    | Immune-B cells |
| 8.24E-194 | 0.65856798 | 0.621 | 0.09  | #####    | 31 | AP1S2    | Immune-B cells |
| 2.16E-284 | 0.65656092 | 0.521 | 0.046 | #####    | 31 | NES      | Immune-B cells |
| 1.06E-209 | 0.65566712 | 0.532 | 0.066 | #####    | 31 | EHD4     | Immune-B cells |
| 5.20E-239 | 0.64844895 | 0.351 | 0.026 | #####    | 31 | PXDN     | Immune-B cells |
| 0.0015913 | 0.64740168 | 0.592 | 0.541 | 1        | 31 | WFDC2    | Immune-B cells |
| 4.02E-257 | 0.64715397 | 0.482 | 0.045 | #####    | 31 | DOCK9    | Immune-B cells |
| 1.49E-61  | 0.64494454 | 0.94  | 0.449 | 5.04E-57 | 31 | BTF3     | Immune-B cells |
| 4.93E-58  | 0.64268938 | 0.975 | 0.543 | 1.66E-53 | 31 | CD63     | Immune-B cells |
| 1.91E-136 | 0.64223293 | 0.663 | 0.134 | #####    | 31 | UACA     | Immune-B cells |
| 5.39E-86  | 0.63955951 | 0.784 | 0.254 | 1.82E-81 | 31 | PTMS     | Immune-B cells |

|           |            |       |       |          |    |           |                |
|-----------|------------|-------|-------|----------|----|-----------|----------------|
| 1.50E-118 | 0.63910496 | 0.624 | 0.135 | #####    | 31 | STOM      | Immune-B cells |
| 3.50E-162 | 0.63746167 | 0.585 | 0.096 | #####    | 31 | LAMC1     | Immune-B cells |
| 6.27E-132 | 0.63628095 | 0.557 | 0.102 | #####    | 31 | PDLIM1    | Immune-B cells |
| 5.21E-219 | 0.63369646 | 0.482 | 0.052 | #####    | 31 | ELK3      | Immune-B cells |
| 3.98E-177 | 0.63231494 | 0.5   | 0.066 | #####    | 31 | FXYD5     | Immune-B cells |
| 2.03E-66  | 0.63170394 | 0.982 | 0.712 | 6.82E-62 | 31 | RPL15     | Immune-B cells |
| 7.72E-77  | 0.63068761 | 0.844 | 0.304 | 2.60E-72 | 31 | CLIC1     | Immune-B cells |
| 1.14E-193 | 0.62961886 | 0.34  | 0.03  | #####    | 31 | LXN       | Immune-B cells |
| 6.75E-90  | 0.62937903 | 0.649 | 0.181 | 2.27E-85 | 31 | RNF7      | Immune-B cells |
| 3.26E-108 | 0.62931053 | 0.851 | 0.243 | #####    | 31 | TIMP1     | Immune-B cells |
| 5.67E-71  | 0.62470328 | 1     | 0.845 | 1.91E-66 | 31 | RPS6      | Immune-B cells |
| 7.07E-220 | 0.62145833 | 0.599 | 0.077 | #####    | 31 | HTRA1     | Immune-B cells |
| 3.88E-292 | 0.62132324 | 0.447 | 0.034 | #####    | 31 | PMP22     | Immune-B cells |
| 1.96E-70  | 0.61836012 | 0.844 | 0.324 | 6.59E-66 | 31 | ARPC2     | Immune-B cells |
| 1.47E-45  | 0.61788097 | 0.954 | 0.607 | 4.95E-41 | 31 | HSPA1A    | Immune-B cells |
| 3.67E-113 | 0.61774283 | 0.723 | 0.184 | #####    | 31 | C14orf166 | Immune-B cells |
| 3.80E-91  | 0.61545654 | 0.759 | 0.23  | 1.28E-86 | 31 | ARPC5     | Immune-B cells |
| 9.38E-225 | 0.60828423 | 0.369 | 0.03  | #####    | 31 | RASGRP3   | Immune-B cells |
| 1.07E-76  | 0.60769363 | 0.631 | 0.182 | 3.61E-72 | 31 | CYR61     | Immune-B cells |
| 3.95E-75  | 0.60613047 | 0.699 | 0.21  | 1.33E-70 | 31 | C8orf4    | Immune-B cells |
| 1.88E-56  | 0.60598952 | 0.922 | 0.435 | 6.34E-52 | 31 | POMP      | Immune-B cells |
| 3.46E-295 | 0.60540298 | 0.429 | 0.031 | #####    | 31 | S1PR1     | Immune-B cells |
| 3.37E-53  | 0.59935408 | 0.968 | 0.555 | 1.13E-48 | 31 | GNB2L1    | Immune-B cells |
| 9.87E-74  | 0.5973032  | 0.809 | 0.288 | 3.33E-69 | 31 | ARPC3     | Immune-B cells |
| 1.09E-103 | 0.59720469 | 0.638 | 0.158 | 3.68E-99 | 31 | CDC37     | Immune-B cells |
| 7.44E-243 | 0.59712409 | 0.408 | 0.034 | #####    | 31 | LMO2      | Immune-B cells |
| 1.48E-51  | 0.59259396 | 0.94  | 0.489 | 4.97E-47 | 31 | RPLP0     | Immune-B cells |
| 3.47E-112 | 0.5925796  | 0.613 | 0.135 | #####    | 31 | SERPINH1  | Immune-B cells |
| 1.51E-139 | 0.59123263 | 0.404 | 0.054 | #####    | 31 | C4orf32   | Immune-B cells |
| 2.31E-114 | 0.59034896 | 0.621 | 0.14  | #####    | 31 | SERPINB6  | Immune-B cells |
| 5.77E-257 | 0.58960142 | 0.422 | 0.034 | #####    | 31 | TMEM204   | Immune-B cells |
| 4.12E-67  | 0.58787718 | 0.911 | 0.374 | 1.39E-62 | 31 | GPX1      | Immune-B cells |
| 2.10E-112 | 0.58722068 | 0.674 | 0.156 | #####    | 31 | EMP1      | Immune-B cells |
| 1.35E-54  | 0.58695385 | 0.972 | 0.543 | 4.54E-50 | 31 | EEF1D     | Immune-B cells |
| 0         | 0.58208616 | 0.365 | 0.014 | 0        | 31 | TNFAIP8L1 | Immune-B cells |
| 6.18E-254 | 0.58024578 | 0.418 | 0.034 | #####    | 31 | RAPGEF5   | Immune-B cells |
| 1.99E-51  | 0.57937301 | 0.975 | 0.614 | 6.71E-47 | 31 | RPL24     | Immune-B cells |
| 7.60E-60  | 0.57778393 | 0.858 | 0.353 | 2.56E-55 | 31 | LDHA      | Immune-B cells |
| 0         | 0.57654213 | 0.323 | 0.013 | 0        | 31 | CTHRC1    | Immune-B cells |
| 0         | 0.57571479 | 0.422 | 0.02  | 0        | 31 | TIE1      | Immune-B cells |
| 2.35E-84  | 0.57516676 | 0.812 | 0.259 | 7.91E-80 | 31 | ARHGAP29  | Immune-B cells |
| 6.67E-95  | 0.56975297 | 0.784 | 0.229 | 2.25E-90 | 31 | RAB13     | Immune-B cells |
| 3.36E-107 | 0.56828225 | 0.606 | 0.136 | #####    | 31 | ITGA6     | Immune-B cells |
| 2.27E-48  | 0.56751767 | 0.982 | 0.629 | 7.65E-44 | 31 | RPS7      | Immune-B cells |
| 2.84E-68  | 0.56354462 | 0.266 | 0.045 | 9.56E-64 | 31 | RBP7      | Immune-B cells |
| 5.91E-107 | 0.56174574 | 0.56  | 0.123 | #####    | 31 | PRMT1     | Immune-B cells |
| 1.20E-45  | 0.56060516 | 0.993 | 0.818 | 4.04E-41 | 31 | S100A6    | Immune-B cells |
| 2.25E-76  | 0.55775041 | 0.791 | 0.266 | 7.58E-72 | 31 | PTTG1IP   | Immune-B cells |

|           |            |       |       |          |    |          |                |
|-----------|------------|-------|-------|----------|----|----------|----------------|
| 3.02E-145 | 0.55520651 | 0.429 | 0.059 | #####    | 31 | PLK2     | Immune-B cells |
| 0         | 0.55436738 | 0.358 | 0.02  | 0        | 31 | KANK3    | Immune-B cells |
| 0         | 0.55379413 | 0.394 | 0.01  | 0        | 31 | MEM255   | Immune-B cells |
| 1.09E-52  | 0.5533026  | 0.936 | 0.443 | 3.66E-48 | 31 | PRDX1    | Immune-B cells |
| 1.13E-250 | 0.5513402  | 0.312 | 0.019 | #####    | 31 | PCDH17   | Immune-B cells |
| 2.36E-61  | 0.55051358 | 1     | 0.881 | 7.94E-57 | 31 | RPS18    | Immune-B cells |
| 4.49E-104 | 0.54933748 | 0.486 | 0.096 | 1.51E-99 | 31 | CAV2     | Immune-B cells |
| 2.08E-75  | 0.54855398 | 0.787 | 0.269 | 7.01E-71 | 31 | TPM3     | Immune-B cells |
| 2.51E-56  | 0.54854465 | 0.989 | 0.747 | 8.47E-52 | 31 | RPL7     | Immune-B cells |
| 8.03E-262 | 0.54825401 | 0.262 | 0.013 | #####    | 31 | GPIHBP1  | Immune-B cells |
| 5.84E-84  | 0.54772429 | 0.511 | 0.118 | 1.97E-79 | 31 | NNMT     | Immune-B cells |
| 1.41E-257 | 0.54484051 | 0.383 | 0.028 | #####    | 31 | PLXND1   | Immune-B cells |
| 1.52E-47  | 0.54228069 | 0.982 | 0.625 | 5.13E-43 | 31 | RPL29    | Immune-B cells |
| 1.48E-60  | 0.53914273 | 0.621 | 0.196 | 4.98E-56 | 31 | INSR     | Immune-B cells |
| 1.28E-71  | 0.5378698  | 0.716 | 0.235 | 4.32E-67 | 31 | TUBB     | Immune-B cells |
| 1.32E-100 | 0.53646478 | 0.645 | 0.158 | 4.46E-96 | 31 | FLNA     | Immune-B cells |
| 3.38E-302 | 0.53637316 | 0.355 | 0.021 | #####    | 31 | PDGFB    | Immune-B cells |
| 1.26E-232 | 0.53524883 | 0.44  | 0.041 | #####    | 31 | ADAM15   | Immune-B cells |
| 8.03E-79  | 0.53417705 | 0.865 | 0.296 | 2.70E-74 | 31 | BRK1     | Immune-B cells |
| 4.98E-56  | 0.53369918 | 0.918 | 0.407 | 1.68E-51 | 31 | PSMA7    | Immune-B cells |
| 3.32E-98  | 0.53283412 | 0.617 | 0.146 | 1.12E-93 | 31 | BST2     | Immune-B cells |
| 7.57E-119 | 0.53216419 | 0.567 | 0.11  | #####    | 31 | TAGLN    | Immune-B cells |
| 5.16E-83  | 0.53160379 | 0.798 | 0.251 | 1.74E-78 | 31 | RBM3     | Immune-B cells |
| 2.62E-58  | 0.53124855 | 0.996 | 0.788 | 8.83E-54 | 31 | TPT1     | Immune-B cells |
| 2.48E-67  | 0.52784621 | 1     | 0.871 | 8.35E-63 | 31 | RPL13    | Immune-B cells |
| 2.69E-45  | 0.5271771  | 0.989 | 0.676 | 9.08E-41 | 31 | H3F3A    | Immune-B cells |
| 7.59E-74  | 0.52707635 | 0.564 | 0.155 | 2.56E-69 | 31 | SERTAD1  | Immune-B cells |
| 3.36E-86  | 0.52621055 | 0.723 | 0.214 | 1.13E-81 | 31 | AP2S1    | Immune-B cells |
| 3.67E-186 | 0.52465439 | 0.362 | 0.034 | #####    | 31 | F2R      | Immune-B cells |
| 3.58E-106 | 0.52352382 | 0.514 | 0.105 | #####    | 31 | SNHG7    | Immune-B cells |
| 5.57E-91  | 0.52279302 | 0.539 | 0.126 | 1.88E-86 | 31 | BAX      | Immune-B cells |
| 2.25E-80  | 0.52264558 | 0.702 | 0.213 | 7.59E-76 | 31 | PSMA1    | Immune-B cells |
| 6.66E-57  | 0.52009446 | 0.89  | 0.38  | 2.24E-52 | 31 | ITGB1    | Immune-B cells |
| 9.24E-239 | 0.51924894 | 0.73  | 0.097 | #####    | 31 | EMCN     | Immune-B cells |
| 1.16E-163 | 0.51886091 | 0.631 | 0.101 | #####    | 31 | SLC9A3R2 | Immune-B cells |
| 5.91E-142 | 0.51815214 | 0.39  | 0.049 | #####    | 31 | SLC2A3   | Immune-B cells |
| 5.25E-51  | 0.51779959 | 0.996 | 0.788 | 1.77E-46 | 31 | RPS15A   | Immune-B cells |
| 1.17E-83  | 0.51751261 | 0.812 | 0.249 | 3.95E-79 | 31 | COX7A1   | Immune-B cells |
| 1.50E-162 | 0.51728635 | 0.287 | 0.025 | #####    | 31 | TP53I11  | Immune-B cells |
| 1.29E-46  | 0.51690655 | 0.993 | 0.725 | 4.34E-42 | 31 | RPL18A   | Immune-B cells |
| 2.10E-44  | 0.51681784 | 0.947 | 0.503 | 7.07E-40 | 31 | NACA     | Immune-B cells |
| 2.03E-121 | 0.51577489 | 0.574 | 0.11  | #####    | 31 | ETS1     | Immune-B cells |
| 3.26E-113 | 0.51491794 | 0.447 | 0.077 | #####    | 31 | MTUS1    | Immune-B cells |
| 3.78E-95  | 0.51397688 | 0.617 | 0.155 | 1.27E-90 | 31 | CCDC50   | Immune-B cells |
| 1.38E-73  | 0.51388136 | 0.805 | 0.278 | 4.66E-69 | 31 | TMEM50A  | Immune-B cells |
| 1.53E-59  | 0.51333497 | 1     | 0.869 | 5.16E-55 | 31 | RPL32    | Immune-B cells |
| 2.96E-25  | 0.51192287 | 0.415 | 0.174 | 9.97E-21 | 31 | ITGB6    | Immune-B cells |
| 1.27E-160 | 0.51083212 | 0.465 | 0.062 | #####    | 31 | WARS     | Immune-B cells |

|           |            |       |       |          |    |          |                |
|-----------|------------|-------|-------|----------|----|----------|----------------|
| 1.20E-280 | 0.51066863 | 0.369 | 0.024 | #####    | 31 | ACVRL1   | Immune-B cells |
| 4.47E-47  | 0.50997063 | 0.95  | 0.481 | 1.51E-42 | 31 | RAC1     | Immune-B cells |
| 2.51E-55  | 0.50976547 | 0.887 | 0.382 | 8.47E-51 | 31 | EID1     | Immune-B cells |
| 3.23E-142 | 0.50935056 | 0.383 | 0.048 | #####    | 31 | EMP2     | Immune-B cells |
| 4.87E-221 | 0.50930687 | 0.344 | 0.027 | #####    | 31 | CYR1     | Immune-B cells |
| 8.09E-82  | 0.50848176 | 0.699 | 0.203 | 2.73E-77 | 31 | NFIB     | Immune-B cells |
| 7.64E-227 | 0.50645691 | 0.28  | 0.018 | #####    | 31 | BMP4     | Immune-B cells |
| 3.64E-71  | 0.50586387 | 0.762 | 0.259 | 1.23E-66 | 31 | PSMA4    | Immune-B cells |
| 1.44E-199 | 0.50518863 | 0.383 | 0.036 | #####    | 31 | FAM43A   | Immune-B cells |
| 3.78E-46  | 0.5037757  | 0.989 | 0.645 | 1.27E-41 | 31 | RPS16    | Immune-B cells |
| 2.66E-51  | 0.50295452 | 0.986 | 0.725 | 8.98E-47 | 31 | RPL8     | Immune-B cells |
| 1.87E-145 | 0.5003353  | 0.528 | 0.084 | #####    | 31 | MTRNR2L1 | Immune-B cells |
| 3.23E-45  | 0.49912399 | 0.993 | 0.712 | 1.09E-40 | 31 | RPS13    | Immune-B cells |
| 2.00E-114 | 0.49267864 | 0.521 | 0.101 | #####    | 31 | NUDT14   | Immune-B cells |
| 1.11E-89  | 0.49267815 | 0.61  | 0.151 | 3.74E-85 | 31 | DPYSL2   | Immune-B cells |
| 1.29E-150 | 0.49178413 | 0.539 | 0.086 | #####    | 31 | PEA15    | Immune-B cells |
| 4.10E-123 | 0.49177467 | 0.482 | 0.083 | #####    | 31 | SWAP70   | Immune-B cells |
| 6.39E-42  | 0.48883207 | 0.309 | 0.082 | 2.15E-37 | 31 | EFEMP1   | Immune-B cells |
| 7.40E-93  | 0.48851647 | 0.447 | 0.086 | 2.49E-88 | 31 | BGN      | Immune-B cells |
| 1.71E-99  | 0.48782075 | 0.564 | 0.126 | 5.77E-95 | 31 | UPP1     | Immune-B cells |
| 0         | 0.48745363 | 0.305 | 0.008 | 0        | 31 | IL3RA    | Immune-B cells |
| 1.44E-119 | 0.48698903 | 0.443 | 0.073 | #####    | 31 | PDLIM7   | Immune-B cells |
| 4.61E-73  | 0.48629632 | 0.855 | 0.303 | 1.55E-68 | 31 | SPTBN1   | Immune-B cells |
| 2.29E-102 | 0.48472507 | 0.493 | 0.099 | 7.73E-98 | 31 | TSPAN4   | Immune-B cells |
| 1.69E-75  | 0.48459758 | 0.66  | 0.195 | 5.70E-71 | 31 | WWTR1    | Immune-B cells |
| 2.72E-190 | 0.48321181 | 0.358 | 0.033 | #####    | 31 | DOCK4    | Immune-B cells |
| 5.25E-77  | 0.48134116 | 0.755 | 0.24  | 1.77E-72 | 31 | PSMB3    | Immune-B cells |
| 1.34E-67  | 0.48070472 | 0.801 | 0.282 | 4.50E-63 | 31 | NOP10    | Immune-B cells |
| 1.64E-123 | 0.47973758 | 0.34  | 0.043 | #####    | 31 | PPP1R14A | Immune-B cells |
| 1.63E-64  | 0.47958421 | 0.801 | 0.289 | 5.49E-60 | 31 | RABAC1   | Immune-B cells |
| 1.32E-286 | 0.47901087 | 0.333 | 0.019 | #####    | 31 | ERG      | Immune-B cells |
| 8.88E-42  | 0.47871437 | 0.986 | 0.632 | 2.99E-37 | 31 | RPL18    | Immune-B cells |
| 8.55E-53  | 0.47733667 | 0.993 | 0.87  | 2.88E-48 | 31 | RPLP1    | Immune-B cells |
| 5.08E-65  | 0.47710079 | 0.805 | 0.292 | 1.71E-60 | 31 | C19orf43 | Immune-B cells |
| 4.11E-84  | 0.47652424 | 0.667 | 0.185 | 1.39E-79 | 31 | PLS3     | Immune-B cells |
| 6.27E-35  | 0.47582765 | 0.972 | 0.624 | 2.11E-30 | 31 | UBB      | Immune-B cells |
| 4.89E-45  | 0.47426995 | 0.996 | 0.82  | 1.65E-40 | 31 | RPL26    | Immune-B cells |
| 2.45E-40  | 0.47389808 | 0.979 | 0.597 | 8.25E-36 | 31 | PPIA     | Immune-B cells |
| 6.78E-126 | 0.47360649 | 0.351 | 0.046 | #####    | 31 | HOMER3   | Immune-B cells |
| 3.35E-45  | 0.47214637 | 0.989 | 0.843 | 1.13E-40 | 31 | RPS19    | Immune-B cells |
| 2.17E-199 | 0.47112471 | 0.301 | 0.023 | #####    | 31 | FILIP1   | Immune-B cells |
| 1.57E-43  | 0.47054612 | 0.996 | 0.717 | 5.28E-39 | 31 | RPL9     | Immune-B cells |
| 3.07E-58  | 0.47018348 | 0.791 | 0.3   | 1.04E-53 | 31 | Sep-19   | Immune-B cells |
| 4.77E-58  | 0.4694363  | 0.706 | 0.251 | 1.61E-53 | 31 | CD151    | Immune-B cells |
| 6.45E-208 | 0.46933258 | 0.344 | 0.028 | #####    | 31 | PPM1F    | Immune-B cells |
| 7.85E-57  | 0.46879977 | 0.876 | 0.35  | 2.65E-52 | 31 | EEF1B2   | Immune-B cells |
| 0         | 0.46775694 | 0.323 | 0.011 | 0        | 31 | DYSF     | Immune-B cells |
| 1.60E-102 | 0.46769507 | 0.511 | 0.104 | 5.38E-98 | 31 | PSMB9    | Immune-B cells |

|           |            |       |       |          |    |          |                |
|-----------|------------|-------|-------|----------|----|----------|----------------|
| 1.01E-43  | 0.46769348 | 0.989 | 0.732 | 3.39E-39 | 31 | RPL19    | Immune-B cells |
| 7.06E-39  | 0.467268   | 0.979 | 0.598 | 2.38E-34 | 31 | RPL7A    | Immune-B cells |
| 4.15E-130 | 0.46665952 | 0.635 | 0.122 | #####    | 31 | MEF2C    | Immune-B cells |
| 5.08E-68  | 0.46614103 | 0.78  | 0.267 | 1.71E-63 | 31 | PSMB1    | Immune-B cells |
| 0         | 0.46574879 | 0.323 | 0.016 | 0        | 31 | SOX18    | Immune-B cells |
| 4.84E-82  | 0.46541596 | 0.461 | 0.103 | 1.63E-77 | 31 | ARL4A    | Immune-B cells |
| 7.60E-59  | 0.4649273  | 0.816 | 0.31  | 2.56E-54 | 31 | YWHAH    | Immune-B cells |
| 4.27E-36  | 0.46473279 | 0.972 | 0.619 | 1.44E-31 | 31 | RPL14    | Immune-B cells |
| 1.30E-40  | 0.46406367 | 0.599 | 0.232 | 4.37E-36 | 31 | STMN1    | Immune-B cells |
| 2.17E-189 | 0.46249408 | 0.415 | 0.043 | #####    | 31 | LDB2     | Immune-B cells |
| 1.11E-158 | 0.46245309 | 0.34  | 0.035 | #####    | 31 | FXYP6    | Immune-B cells |
| 0         | 0.4621809  | 0.277 | 0.009 | 0        | 31 | GALNT15  | Immune-B cells |
| 1.28E-280 | 0.46217692 | 0.273 | 0.013 | #####    | 31 | VASH1    | Immune-B cells |
| 4.05E-41  | 0.46151513 | 0.993 | 0.721 | 1.37E-36 | 31 | RPL27A   | Immune-B cells |
| 2.06E-46  | 0.46058257 | 0.869 | 0.389 | 6.93E-42 | 31 | NEDD8    | Immune-B cells |
| 1.32E-35  | 0.45966297 | 0.954 | 0.562 | 4.46E-31 | 31 | S100A11  | Immune-B cells |
| 1.20E-91  | 0.45837652 | 0.493 | 0.106 | 4.04E-87 | 31 | ACTN1    | Immune-B cells |
| 2.47E-59  | 0.45762697 | 0.844 | 0.326 | 8.32E-55 | 31 | EIF2S2   | Immune-B cells |
| 2.19E-44  | 0.45657929 | 0.957 | 0.466 | 7.37E-40 | 31 | SUMO2    | Immune-B cells |
| 1.04E-217 | 0.45645269 | 0.348 | 0.027 | #####    | 31 | MMRN2    | Immune-B cells |
| 0         | 0.45628192 | 0.309 | 0.013 | 0        | 31 | STAB1    | Immune-B cells |
| 4.85E-78  | 0.45421417 | 0.433 | 0.097 | 1.63E-73 | 31 | EFNA1    | Immune-B cells |
| 7.41E-94  | 0.45326072 | 0.472 | 0.095 | 2.50E-89 | 31 | ITM2A    | Immune-B cells |
| 1.53E-66  | 0.45095174 | 0.55  | 0.156 | 5.16E-62 | 31 | MGLL     | Immune-B cells |
| 4.60E-158 | 0.45022356 | 0.298 | 0.027 | #####    | 31 | THBD     | Immune-B cells |
| 3.19E-78  | 0.44938342 | 0.447 | 0.101 | 1.07E-73 | 31 | BCAP29   | Immune-B cells |
| 2.79E-63  | 0.4484503  | 0.663 | 0.221 | 9.41E-59 | 31 | RANBP1   | Immune-B cells |
| 7.29E-73  | 0.44756591 | 0.695 | 0.215 | 2.46E-68 | 31 | ATF4     | Immune-B cells |
| 1.06E-127 | 0.44675938 | 0.433 | 0.066 | #####    | 31 | VAT1     | Immune-B cells |
| 7.46E-187 | 0.44546413 | 0.376 | 0.036 | #####    | 31 | NOSTRIN  | Immune-B cells |
| 3.87E-67  | 0.44515243 | 0.645 | 0.202 | 1.30E-62 | 31 | PRELID1  | Immune-B cells |
| 3.22E-34  | 0.44495875 | 0.961 | 0.574 | 1.09E-29 | 31 | UBC      | Immune-B cells |
| 3.10E-243 | 0.44428247 | 0.284 | 0.017 | #####    | 31 | KIAA1462 | Immune-B cells |
| 2.01E-85  | 0.44366123 | 0.387 | 0.075 | 6.77E-81 | 31 | MRPL17   | Immune-B cells |
| 3.69E-72  | 0.44193715 | 0.61  | 0.177 | 1.24E-67 | 31 | WASF2    | Immune-B cells |
| 1.28E-170 | 0.44192844 | 0.44  | 0.053 | #####    | 31 | SYNPO    | Immune-B cells |
| 5.99E-44  | 0.44169759 | 0.879 | 0.402 | 2.02E-39 | 31 | HSPA8    | Immune-B cells |
| 9.14E-87  | 0.44049018 | 0.543 | 0.131 | 3.08E-82 | 31 | FEZ2     | Immune-B cells |
| 7.91E-274 | 0.43834956 | 0.337 | 0.021 | #####    | 31 | ITGA5    | Immune-B cells |
| 7.70E-57  | 0.43676943 | 0.77  | 0.285 | 2.60E-52 | 31 | RAN      | Immune-B cells |
| 0         | 0.43676195 | 0.291 | 0.007 | 0        | 31 | ANGPTL2  | Immune-B cells |
| 8.62E-18  | 0.43572641 | 0.496 | 0.253 | 2.91E-13 | 31 | S100A4   | Immune-B cells |
| 1.47E-37  | 0.43531713 | 0.961 | 0.517 | 4.95E-33 | 31 | DYNLL1   | Immune-B cells |
| 1.17E-33  | 0.43479751 | 0.975 | 0.626 | 3.94E-29 | 31 | RPS5     | Immune-B cells |
| 1.12E-28  | 0.43240122 | 0.348 | 0.122 | 3.78E-24 | 31 | CXCL2    | Immune-B cells |
| 4.42E-64  | 0.43184625 | 0.606 | 0.19  | 1.49E-59 | 31 | SNRPD1   | Immune-B cells |
| 5.65E-44  | 0.43163522 | 1     | 0.83  | 1.90E-39 | 31 | RPS12    | Immune-B cells |
| 3.25E-56  | 0.43160754 | 0.72  | 0.26  | 1.09E-51 | 31 | TSPO     | Immune-B cells |

|           |            |       |       |          |    |          |                |
|-----------|------------|-------|-------|----------|----|----------|----------------|
| 9.08E-134 | 0.43048909 | 0.312 | 0.035 | #####    | 31 | SMAD1    | Immune-B cells |
| 3.30E-55  | 0.43015957 | 0.844 | 0.329 | 1.11E-50 | 31 | EIF3E    | Immune-B cells |
| 2.35E-51  | 0.42941669 | 0.709 | 0.27  | 7.92E-47 | 31 | YWHAQ    | Immune-B cells |
| 4.84E-33  | 0.42895108 | 0.979 | 0.634 | 1.63E-28 | 31 | RPL10A   | Immune-B cells |
| 4.29E-159 | 0.42873008 | 0.326 | 0.033 | #####    | 31 | TSPAN13  | Immune-B cells |
| 7.34E-172 | 0.42871237 | 0.44  | 0.051 | #####    | 31 | PTPRB    | Immune-B cells |
| 1.12E-32  | 0.4286385  | 0.972 | 0.591 | 3.76E-28 | 31 | RPL30    | Immune-B cells |
| 3.03E-104 | 0.42807445 | 0.426 | 0.075 | 1.02E-99 | 31 | MAP4K4   | Immune-B cells |
| 1.53E-65  | 0.4273997  | 0.628 | 0.196 | 5.14E-61 | 31 | UBXN1    | Immune-B cells |
| 0         | 0.42666798 | 0.27  | 0.011 | 0        | 31 | AFAP1L1  | Immune-B cells |
| 5.57E-41  | 0.42606956 | 0.996 | 0.801 | 1.88E-36 | 31 | RPL11    | Immune-B cells |
| 1.51E-92  | 0.42583447 | 0.365 | 0.062 | 5.07E-88 | 31 | LPAR6    | Immune-B cells |
| 0         | 0.42556205 | 0.291 | 0.013 | 0        | 31 | PDE2A    | Immune-B cells |
| 2.99E-137 | 0.42493772 | 0.355 | 0.043 | #####    | 31 | TXNRD2   | Immune-B cells |
| 3.25E-255 | 0.42409246 | 0.273 | 0.015 | #####    | 31 | PALD1    | Immune-B cells |
| 1.79E-63  | 0.42251729 | 0.585 | 0.179 | 6.04E-59 | 31 | PSMB5    | Immune-B cells |
| 9.82E-67  | 0.42205857 | 0.596 | 0.179 | 3.31E-62 | 31 | SH3GLB1  | Immune-B cells |
| 2.00E-68  | 0.42150614 | 0.457 | 0.112 | 6.72E-64 | 31 | RND3     | Immune-B cells |
| 4.38E-40  | 0.42059806 | 0.894 | 0.422 | 1.47E-35 | 31 | EEF2     | Immune-B cells |
| 2.12E-92  | 0.42000565 | 0.305 | 0.045 | 7.14E-88 | 31 | CARD16   | Immune-B cells |
| 2.05E-68  | 0.41972805 | 0.667 | 0.209 | 6.92E-64 | 31 | CAPZB    | Immune-B cells |
| 3.24E-104 | 0.41882242 | 0.323 | 0.046 | 1.09E-99 | 31 | FADS3    | Immune-B cells |
| 1.25E-74  | 0.41864309 | 0.415 | 0.092 | 4.21E-70 | 31 | TPRKB    | Immune-B cells |
| 1.05E-105 | 0.41780253 | 0.447 | 0.081 | #####    | 31 | LUZP1    | Immune-B cells |
| 1.52E-64  | 0.4171078  | 0.66  | 0.214 | 5.13E-60 | 31 | MACF1    | Immune-B cells |
| 1.36E-86  | 0.41504269 | 0.518 | 0.121 | 4.57E-82 | 31 | NAA10    | Immune-B cells |
| 2.56E-139 | 0.41401288 | 0.358 | 0.043 | #####    | 31 | TMEM173  | Immune-B cells |
| 2.06E-53  | 0.41392793 | 0.404 | 0.107 | 6.93E-49 | 31 | GADD45G  | Immune-B cells |
| 3.39E-35  | 0.4129288  | 0.989 | 0.731 | 1.14E-30 | 31 | RPS4X    | Immune-B cells |
| 1.02E-36  | 0.41284139 | 0.989 | 0.725 | 3.44E-32 | 31 | RPS17    | Immune-B cells |
| 4.97E-60  | 0.41273341 | 0.784 | 0.279 | 1.68E-55 | 31 | SF3B6    | Immune-B cells |
| 2.96E-47  | 0.41249721 | 0.833 | 0.354 | 9.97E-43 | 31 | SNX3     | Immune-B cells |
| 8.07E-92  | 0.41147231 | 0.475 | 0.101 | 2.72E-87 | 31 | VAMP3    | Immune-B cells |
| 1.06E-77  | 0.41121632 | 0.55  | 0.141 | 3.57E-73 | 31 | LIMCH1   | Immune-B cells |
| 1.18E-122 | 0.41055993 | 0.67  | 0.139 | #####    | 31 | EPAS1    | Immune-B cells |
| 5.43E-224 | 0.41051054 | 0.277 | 0.017 | #####    | 31 | IGF2     | Immune-B cells |
| 9.71E-45  | 0.4101991  | 0.883 | 0.39  | 3.27E-40 | 31 | RHOA     | Immune-B cells |
| 1.12E-37  | 0.40949281 | 0.933 | 0.471 | 3.76E-33 | 31 | RPL4     | Immune-B cells |
| 1.61E-63  | 0.4092447  | 0.638 | 0.2   | 5.44E-59 | 31 | INC01420 | Immune-B cells |
| 3.03E-93  | 0.40716894 | 0.436 | 0.086 | 1.02E-88 | 31 | HDAC7    | Immune-B cells |
| 2.69E-60  | 0.40656849 | 0.684 | 0.231 | 9.08E-56 | 31 | PSMB6    | Immune-B cells |
| 1.44E-69  | 0.40629233 | 0.674 | 0.211 | 4.85E-65 | 31 | ARF1     | Immune-B cells |
| 3.68E-46  | 0.40569244 | 0.869 | 0.381 | 1.24E-41 | 31 | NAP1L1   | Immune-B cells |
| 0         | 0.405371   | 0.273 | 0.01  | 0        | 31 | RHOJ     | Immune-B cells |
| 2.78E-70  | 0.40381305 | 0.489 | 0.125 | 9.36E-66 | 31 | PON2     | Immune-B cells |
| 4.04E-27  | 0.4034881  | 0.507 | 0.223 | 1.36E-22 | 31 | SERPING1 | Immune-B cells |
| 8.47E-78  | 0.40331605 | 0.39  | 0.079 | 2.85E-73 | 31 | C1orf54  | Immune-B cells |
| 1.89E-38  | 0.40286322 | 0.986 | 0.793 | 6.38E-34 | 31 | RPLP2    | Immune-B cells |

|           |            |       |       |          |    |          |                |
|-----------|------------|-------|-------|----------|----|----------|----------------|
| 6.31E-30  | 0.40125873 | 0.979 | 0.614 | 2.12E-25 | 31 | RPL5     | Immune-B cells |
| 2.15E-49  | 0.40094218 | 0.801 | 0.326 | 7.24E-45 | 31 | NAA38    | Immune-B cells |
| 1.92E-53  | 0.40047109 | 0.472 | 0.139 | 6.47E-49 | 31 | ARHGAP18 | Immune-B cells |
| 2.23E-60  | 0.40026498 | 0.56  | 0.172 | 7.50E-56 | 31 | SNRPB    | Immune-B cells |
| 7.63E-156 | 0.39982146 | 0.305 | 0.029 | #####    | 31 | TUBB6    | Immune-B cells |
| 2.76E-39  | 0.39904949 | 0.993 | 0.843 | 9.31E-35 | 31 | RPS14    | Immune-B cells |
| 6.71E-68  | 0.39897136 | 0.638 | 0.196 | 2.26E-63 | 31 | LAMTOR2  | Immune-B cells |
| 1.73E-81  | 0.39847301 | 0.489 | 0.112 | 5.83E-77 | 31 | NRP1     | Immune-B cells |
| 9.52E-68  | 0.39813257 | 0.436 | 0.106 | 3.21E-63 | 31 | LAP3     | Immune-B cells |
| 9.79E-50  | 0.39776065 | 0.574 | 0.196 | 3.30E-45 | 31 | DUSP23   | Immune-B cells |
| 0         | 0.39755831 | 0.266 | 0.01  | 0        | 31 | SEMA6B   | Immune-B cells |
| 3.85E-108 | 0.39741414 | 0.291 | 0.037 | #####    | 31 | USP31    | Immune-B cells |
| 2.61E-45  | 0.39699962 | 0.787 | 0.325 | 8.79E-41 | 31 | HSPD1    | Immune-B cells |
| 5.82E-150 | 0.39642561 | 0.277 | 0.025 | #####    | 31 | PLEKHG1  | Immune-B cells |
| 1.69E-142 | 0.39591952 | 0.284 | 0.028 | #####    | 31 | GRPEL2   | Immune-B cells |
| 1.45E-82  | 0.39557209 | 0.404 | 0.081 | 4.90E-78 | 31 | MAST4    | Immune-B cells |
| 4.57E-120 | 0.39497465 | 0.369 | 0.052 | #####    | 31 | ECE1     | Immune-B cells |
| 1.39E-68  | 0.39492029 | 0.507 | 0.136 | 4.68E-64 | 31 | PKIG     | Immune-B cells |
| 1.30E-55  | 0.39261235 | 0.762 | 0.285 | 4.37E-51 | 31 | ENY2     | Immune-B cells |
| 1.07E-86  | 0.392025   | 0.326 | 0.054 | 3.61E-82 | 31 | GGH      | Immune-B cells |
| 3.94E-69  | 0.39074049 | 0.624 | 0.187 | 1.33E-64 | 31 | AP2M1    | Immune-B cells |
| 1.49E-144 | 0.39058802 | 0.323 | 0.034 | #####    | 31 | GBP4     | Immune-B cells |
| 5.32E-66  | 0.39028036 | 0.454 | 0.116 | 1.79E-61 | 31 | NASP     | Immune-B cells |
| 6.09E-56  | 0.38947356 | 0.606 | 0.202 | 2.05E-51 | 31 | ARL2     | Immune-B cells |
| 5.19E-42  | 0.38933661 | 0.894 | 0.388 | 1.75E-37 | 31 | MGST3    | Immune-B cells |
| 3.21E-45  | 0.38883751 | 1     | 0.921 | 1.08E-40 | 31 | EEF1A1   | Immune-B cells |
| 1.63E-63  | 0.38829614 | 0.546 | 0.157 | 5.50E-59 | 31 | NEDD9    | Immune-B cells |
| 2.26E-26  | 0.38693803 | 0.979 | 0.672 | 7.62E-22 | 31 | EIF1     | Immune-B cells |
| 2.32E-83  | 0.38674798 | 0.628 | 0.166 | 7.83E-79 | 31 | TGFB2    | Immune-B cells |
| 5.82E-30  | 0.38638902 | 0.291 | 0.091 | 1.96E-25 | 31 | INC01503 | Immune-B cells |
| 3.88E-38  | 0.38592924 | 0.993 | 0.863 | 1.31E-33 | 31 | RPL13A   | Immune-B cells |
| 1.34E-62  | 0.38535344 | 0.645 | 0.207 | 4.52E-58 | 31 | RDX      | Immune-B cells |
| 2.61E-155 | 0.38496824 | 0.27  | 0.023 | #####    | 31 | PLEKHO1  | Immune-B cells |
| 1.32E-123 | 0.38463096 | 0.301 | 0.034 | #####    | 31 | LY96     | Immune-B cells |
| 1.23E-31  | 0.38449367 | 0.982 | 0.728 | 4.15E-27 | 31 | SERF2    | Immune-B cells |
| 4.96E-141 | 0.38432885 | 0.355 | 0.042 | #####    | 31 | DOCK6    | Immune-B cells |
| 3.58E-54  | 0.3842682  | 0.67  | 0.235 | 1.21E-49 | 31 | VPS29    | Immune-B cells |
| 2.34E-34  | 0.38316468 | 0.989 | 0.767 | 7.88E-30 | 31 | RPL28    | Immune-B cells |
| 5.64E-26  | 0.38303064 | 0.929 | 0.537 | 1.90E-21 | 31 | RPS27L   | Immune-B cells |
| 1.02E-69  | 0.38084483 | 0.436 | 0.105 | 3.43E-65 | 31 | PRDX4    | Immune-B cells |
| 2.06E-46  | 0.37953476 | 0.773 | 0.317 | 6.95E-42 | 31 | CAPZA2   | Immune-B cells |
| 2.14E-232 | 0.37941638 | 0.312 | 0.021 | #####    | 31 | GIMAP6   | Immune-B cells |
| 1.33E-203 | 0.37902303 | 0.277 | 0.019 | #####    | 31 | CDH13    | Immune-B cells |
| 5.59E-56  | 0.37809394 | 0.582 | 0.188 | 1.88E-51 | 31 | GSTO1    | Immune-B cells |
| 2.52E-56  | 0.37793446 | 0.546 | 0.171 | 8.48E-52 | 31 | GNB2     | Immune-B cells |
| 5.40E-58  | 0.37776281 | 0.539 | 0.165 | 1.82E-53 | 31 | PSMA3    | Immune-B cells |
| 7.74E-165 | 0.37767609 | 0.284 | 0.024 | #####    | 31 | LRRC32   | Immune-B cells |
| 6.38E-61  | 0.37734548 | 0.617 | 0.196 | 2.15E-56 | 31 | REXO2    | Immune-B cells |

|           |            |       |       |          |    |          |                |
|-----------|------------|-------|-------|----------|----|----------|----------------|
| 2.90E-95  | 0.37726923 | 0.312 | 0.046 | 9.76E-91 | 31 | EIF4EBP1 | Immune-B cells |
| 4.00E-229 | 0.37689867 | 0.266 | 0.016 | #####    | 31 | TMEM233  | Immune-B cells |
| 3.66E-197 | 0.37651916 | 0.287 | 0.021 | #####    | 31 | GFOD1    | Immune-B cells |
| 6.39E-59  | 0.37465906 | 0.691 | 0.235 | 2.15E-54 | 31 | NDUFA12  | Immune-B cells |
| 4.95E-64  | 0.37461187 | 0.631 | 0.197 | 1.67E-59 | 31 | OSTC     | Immune-B cells |
| 1.37E-74  | 0.37460024 | 0.496 | 0.123 | 4.61E-70 | 31 | FLNB     | Immune-B cells |
| 6.04E-101 | 0.37454052 | 0.379 | 0.062 | 2.03E-96 | 31 | PTPRM    | Immune-B cells |
| 5.98E-200 | 0.37396269 | 0.376 | 0.034 | #####    | 31 | KDR      | Immune-B cells |
| 3.67E-31  | 0.37341357 | 0.989 | 0.74  | 1.23E-26 | 31 | RPS3A    | Immune-B cells |
| 2.34E-53  | 0.37228302 | 0.66  | 0.232 | 7.90E-49 | 31 | MRFAP1   | Immune-B cells |
| 1.73E-67  | 0.3717379  | 0.397 | 0.089 | 5.82E-63 | 31 | PMAIP1   | Immune-B cells |
| 2.88E-83  | 0.37030661 | 0.394 | 0.078 | 9.71E-79 | 31 | RALA     | Immune-B cells |
| 7.41E-43  | 0.37022813 | 0.362 | 0.103 | 2.50E-38 | 31 | PHLDA1   | Immune-B cells |
| 3.42E-76  | 0.3701993  | 0.472 | 0.111 | 1.15E-71 | 31 | SP100    | Immune-B cells |
| 3.90E-29  | 0.36975266 | 0.986 | 0.764 | 1.31E-24 | 31 | RPL35A   | Immune-B cells |
| 1.57E-48  | 0.36958859 | 0.702 | 0.264 | 5.29E-44 | 31 | PPIB     | Immune-B cells |
| 4.80E-29  | 0.36913309 | 0.982 | 0.638 | 1.62E-24 | 31 | UBA52    | Immune-B cells |
| 3.14E-27  | 0.36744195 | 0.975 | 0.637 | 1.06E-22 | 31 | HMGB1    | Immune-B cells |
| 2.05E-82  | 0.36615885 | 0.433 | 0.091 | 6.92E-78 | 31 | FRMD4B   | Immune-B cells |
| 1.09E-51  | 0.36589212 | 0.66  | 0.238 | 3.67E-47 | 31 | TCEB1    | Immune-B cells |
| 3.98E-66  | 0.36467707 | 0.493 | 0.132 | 1.34E-61 | 31 | CNIH1    | Immune-B cells |
| 3.51E-102 | 0.36444787 | 0.273 | 0.034 | 1.18E-97 | 31 | GJA1     | Immune-B cells |
| 1.26E-32  | 0.36433689 | 0.879 | 0.437 | 4.24E-28 | 31 | NPM1     | Immune-B cells |
| 2.76E-105 | 0.363892   | 0.287 | 0.037 | #####    | 31 | SMTN     | Immune-B cells |
| 5.49E-197 | 0.36376117 | 0.277 | 0.019 | #####    | 31 | RASIP1   | Immune-B cells |
| 7.83E-59  | 0.36375817 | 0.553 | 0.17  | 2.64E-54 | 31 | UBE2L3   | Immune-B cells |
| 8.82E-57  | 0.3635329  | 0.56  | 0.176 | 2.97E-52 | 31 | GDI2     | Immune-B cells |
| 4.18E-40  | 0.36325018 | 0.894 | 0.404 | 1.41E-35 | 31 | TXN      | Immune-B cells |
| 6.55E-63  | 0.36243316 | 0.45  | 0.116 | 2.21E-58 | 31 | PLP2     | Immune-B cells |
| 1.75E-51  | 0.36226438 | 0.78  | 0.294 | 5.89E-47 | 31 | DYNLRB1  | Immune-B cells |
| 6.56E-67  | 0.36159023 | 0.426 | 0.102 | 2.21E-62 | 31 | GSDMD    | Immune-B cells |
| 3.16E-143 | 0.36142258 | 0.287 | 0.028 | #####    | 31 | PARVB    | Immune-B cells |
| 2.16E-33  | 0.36135414 | 0.897 | 0.443 | 7.28E-29 | 31 | RPL36AL  | Immune-B cells |
| 8.43E-63  | 0.36133897 | 0.539 | 0.157 | 2.84E-58 | 31 | CLTB     | Immune-B cells |
| 4.35E-51  | 0.36011577 | 0.812 | 0.317 | 1.47E-46 | 31 | GNG5     | Immune-B cells |
| 1.04E-39  | 0.36002126 | 0.582 | 0.223 | 3.50E-35 | 31 | MAP1LC3B | Immune-B cells |
| 3.71E-74  | 0.36000048 | 0.521 | 0.134 | 1.25E-69 | 31 | POLR1D   | Immune-B cells |
| 4.41E-58  | 0.35946178 | 0.457 | 0.127 | 1.49E-53 | 31 | MYDGF    | Immune-B cells |
| 1.06E-63  | 0.35922318 | 0.564 | 0.165 | 3.57E-59 | 31 | TBCB     | Immune-B cells |
| 1.10E-57  | 0.35886278 | 0.504 | 0.147 | 3.71E-53 | 31 | TMOD3    | Immune-B cells |
| 4.64E-34  | 0.35866698 | 0.993 | 0.851 | 1.56E-29 | 31 | RPS15    | Immune-B cells |
| 9.28E-54  | 0.35776838 | 0.819 | 0.307 | 3.13E-49 | 31 | DAD1     | Immune-B cells |
| 1.06E-49  | 0.35670295 | 0.652 | 0.237 | 3.58E-45 | 31 | RSL24D1  | Immune-B cells |
| 3.25E-51  | 0.35661391 | 0.617 | 0.214 | 1.10E-46 | 31 | EIF3F    | Immune-B cells |
| 3.67E-27  | 0.35528689 | 0.972 | 0.599 | 1.24E-22 | 31 | RPL27    | Immune-B cells |
| 6.39E-56  | 0.35509256 | 0.511 | 0.155 | 2.15E-51 | 31 | RAB5C    | Immune-B cells |
| 1.78E-55  | 0.35492889 | 0.677 | 0.235 | 6.00E-51 | 31 | SSR2     | Immune-B cells |
| 2.73E-53  | 0.35453993 | 0.635 | 0.22  | 9.21E-49 | 31 | SSB      | Immune-B cells |

|           |            |       |       |          |    |          |                |
|-----------|------------|-------|-------|----------|----|----------|----------------|
| 5.26E-52  | 0.35447321 | 0.61  | 0.209 | 1.77E-47 | 31 | BRI3     | Immune-B cells |
| 8.89E-45  | 0.35393526 | 0.766 | 0.313 | 3.00E-40 | 31 | SNU13    | Immune-B cells |
| 1.54E-51  | 0.35294366 | 0.436 | 0.126 | 5.20E-47 | 31 | LIMS1    | Immune-B cells |
| 1.74E-69  | 0.35220774 | 0.546 | 0.15  | 5.85E-65 | 31 | PSMB2    | Immune-B cells |
| 2.12E-35  | 0.35068567 | 0.915 | 0.443 | 7.14E-31 | 31 | EDF1     | Immune-B cells |
| 4.92E-49  | 0.35046987 | 0.635 | 0.228 | 1.66E-44 | 31 | CNBP     | Immune-B cells |
| 1.17E-51  | 0.35018009 | 0.383 | 0.1   | 3.94E-47 | 31 | ZFAND2A  | Immune-B cells |
| 2.55E-65  | 0.35004912 | 0.447 | 0.114 | 8.59E-61 | 31 | RCN1     | Immune-B cells |
| 1.73E-62  | 0.3491522  | 0.468 | 0.124 | 5.82E-58 | 31 | PSMB8    | Immune-B cells |
| 2.84E-28  | 0.34889251 | 0.929 | 0.509 | 9.58E-24 | 31 | RHOB     | Immune-B cells |
| 1.69E-75  | 0.34843373 | 0.426 | 0.094 | 5.68E-71 | 31 | RSU1     | Immune-B cells |
| 5.80E-163 | 0.34800487 | 0.266 | 0.021 | #####    | 31 | NAV1     | Immune-B cells |
| 7.15E-57  | 0.34766962 | 0.401 | 0.101 | 2.41E-52 | 31 | NQO1     | Immune-B cells |
| 2.30E-27  | 0.34740073 | 0.876 | 0.461 | 7.74E-23 | 31 | CHCHD2   | Immune-B cells |
| 6.31E-30  | 0.34737702 | 0.383 | 0.135 | 2.13E-25 | 31 | HSPA6    | Immune-B cells |
| 1.70E-39  | 0.34682686 | 0.812 | 0.358 | 5.72E-35 | 31 | SSR4     | Immune-B cells |
| 3.41E-52  | 0.34605724 | 0.727 | 0.267 | 1.15E-47 | 31 | SNRPB2   | Immune-B cells |
| 1.35E-45  | 0.3456471  | 0.755 | 0.299 | 4.56E-41 | 31 | CD81     | Immune-B cells |
| 5.29E-27  | 0.34500408 | 0.894 | 0.501 | 1.78E-22 | 31 | YBX1     | Immune-B cells |
| 1.96E-55  | 0.34499335 | 0.305 | 0.065 | 6.61E-51 | 31 | SLC12A2  | Immune-B cells |
| 9.52E-33  | 0.34472766 | 0.996 | 0.834 | 3.21E-28 | 31 | RPS23    | Immune-B cells |
| 1.34E-48  | 0.34352963 | 0.691 | 0.259 | 4.51E-44 | 31 | CHMP2A   | Immune-B cells |
| 1.23E-70  | 0.34304593 | 0.621 | 0.178 | 4.16E-66 | 31 | ETS2     | Immune-B cells |
| 1.73E-52  | 0.34201717 | 0.404 | 0.111 | 5.83E-48 | 31 | STRA13   | Immune-B cells |
| 3.61E-112 | 0.34140999 | 0.277 | 0.033 | #####    | 31 | IKBIP    | Immune-B cells |
| 2.56E-52  | 0.34104082 | 0.791 | 0.299 | 8.62E-48 | 31 | RAB11A   | Immune-B cells |
| 1.23E-71  | 0.34092776 | 0.387 | 0.083 | 4.16E-67 | 31 | SVIL     | Immune-B cells |
| 2.27E-55  | 0.34052658 | 0.628 | 0.21  | 7.66E-51 | 31 | ACTR3    | Immune-B cells |
| 1.64E-53  | 0.34004155 | 0.674 | 0.235 | 5.52E-49 | 31 | PSME2    | Immune-B cells |
| 8.22E-73  | 0.33772555 | 0.316 | 0.059 | 2.77E-68 | 31 | NANS     | Immune-B cells |
| 3.28E-69  | 0.33711431 | 0.252 | 0.04  | 1.11E-64 | 31 | ICAM1    | Immune-B cells |
| 2.28E-39  | 0.33688183 | 0.812 | 0.348 | 7.67E-35 | 31 | GABARAPL | Immune-B cells |
| 5.61E-24  | 0.33674857 | 0.993 | 0.689 | 1.89E-19 | 31 | SRP14    | Immune-B cells |
| 2.77E-72  | 0.33603454 | 0.365 | 0.076 | 9.35E-68 | 31 | UFD1L    | Immune-B cells |
| 5.55E-70  | 0.33533903 | 0.394 | 0.087 | 1.87E-65 | 31 | DGKH     | Immune-B cells |
| 1.10E-41  | 0.33532613 | 0.585 | 0.217 | 3.71E-37 | 31 | DUT      | Immune-B cells |
| 1.41E-81  | 0.3348441  | 0.273 | 0.041 | 4.77E-77 | 31 | HAUS1    | Immune-B cells |
| 8.08E-43  | 0.33453946 | 0.766 | 0.31  | 2.72E-38 | 31 | NFKBIA   | Immune-B cells |
| 7.27E-57  | 0.33389959 | 0.624 | 0.203 | 2.45E-52 | 31 | FCGRT    | Immune-B cells |
| 5.71E-29  | 0.33371661 | 0.787 | 0.378 | 1.92E-24 | 31 | GADD45B  | Immune-B cells |
| 3.47E-70  | 0.3327576  | 0.454 | 0.109 | 1.17E-65 | 31 | PHACTR2  | Immune-B cells |
| 1.12E-161 | 0.33274484 | 0.252 | 0.019 | #####    | 31 | FLI1     | Immune-B cells |
| 1.15E-94  | 0.33271081 | 0.33  | 0.051 | 3.87E-90 | 31 | ASAP1    | Immune-B cells |
| 4.81E-68  | 0.33254528 | 0.33  | 0.066 | 1.62E-63 | 31 | ANXA6    | Immune-B cells |
| 8.61E-35  | 0.33227884 | 0.837 | 0.388 | 2.90E-30 | 31 | YWHAB    | Immune-B cells |
| 1.09E-67  | 0.33139984 | 0.316 | 0.061 | 3.68E-63 | 31 | SNRK     | Immune-B cells |
| 6.44E-42  | 0.33123197 | 0.855 | 0.371 | 2.17E-37 | 31 | SHFM1    | Immune-B cells |
| 6.18E-33  | 0.33065056 | 0.993 | 0.876 | 2.08E-28 | 31 | RPS27A   | Immune-B cells |

|           |            |       |       |          |    |          |                |
|-----------|------------|-------|-------|----------|----|----------|----------------|
| 8.40E-41  | 0.33031715 | 0.78  | 0.325 | 2.83E-36 | 31 | SEC61B   | Immune-B cells |
| 3.16E-60  | 0.33025301 | 0.532 | 0.156 | 1.06E-55 | 31 | CAMLG    | Immune-B cells |
| 9.55E-90  | 0.33020391 | 0.309 | 0.047 | 3.22E-85 | 31 | DLC1     | Immune-B cells |
| 4.35E-55  | 0.32999408 | 0.447 | 0.126 | 1.47E-50 | 31 | ARPC5L   | Immune-B cells |
| 1.47E-24  | 0.32995923 | 0.968 | 0.564 | 4.96E-20 | 31 | HINT1    | Immune-B cells |
| 3.09E-53  | 0.32939131 | 0.443 | 0.127 | 1.04E-48 | 31 | LSM2     | Immune-B cells |
| 9.06E-53  | 0.32914097 | 0.599 | 0.201 | 3.05E-48 | 31 | TMED9    | Immune-B cells |
| 1.31E-47  | 0.32801035 | 0.631 | 0.228 | 4.41E-43 | 31 | DNAJC15  | Immune-B cells |
| 2.19E-51  | 0.32767407 | 0.553 | 0.18  | 7.39E-47 | 31 | ZNF706   | Immune-B cells |
| 1.07E-85  | 0.32678938 | 0.323 | 0.053 | 3.59E-81 | 31 | IFITM1   | Immune-B cells |
| 2.42E-58  | 0.32638959 | 0.486 | 0.138 | 8.15E-54 | 31 | EIF3I    | Immune-B cells |
| 4.27E-26  | 0.32589846 | 0.652 | 0.305 | 1.44E-21 | 31 | BCAM     | Immune-B cells |
| 2.53E-52  | 0.32429422 | 0.667 | 0.236 | 8.54E-48 | 31 | CRIM1    | Immune-B cells |
| 1.72E-43  | 0.32332884 | 0.667 | 0.257 | 5.78E-39 | 31 | MRPL51   | Immune-B cells |
| 2.08E-192 | 0.32328331 | 0.27  | 0.019 | #####    | 31 | ADCY4    | Immune-B cells |
| 1.13E-63  | 0.32270089 | 0.34  | 0.072 | 3.82E-59 | 31 | CDC42EP3 | Immune-B cells |
| 1.37E-50  | 0.32205375 | 0.649 | 0.229 | 4.63E-46 | 31 | C9orf16  | Immune-B cells |
| 3.46E-51  | 0.32174905 | 0.454 | 0.134 | 1.17E-46 | 31 | PSMD4    | Immune-B cells |
| 4.09E-62  | 0.32158475 | 0.493 | 0.133 | 1.38E-57 | 31 | CARHSP1  | Immune-B cells |
| 1.62E-51  | 0.32120508 | 0.369 | 0.096 | 5.46E-47 | 31 | ZYX      | Immune-B cells |
| 7.68E-22  | 0.31995994 | 0.979 | 0.682 | 2.59E-17 | 31 | RPS20    | Immune-B cells |
| 3.54E-57  | 0.3199312  | 0.323 | 0.073 | 1.19E-52 | 31 | CARD19   | Immune-B cells |
| 1.81E-164 | 0.31973709 | 0.252 | 0.019 | #####    | 31 | GIMAP1   | Immune-B cells |
| 1.60E-43  | 0.31948325 | 0.67  | 0.26  | 5.39E-39 | 31 | SEC11A   | Immune-B cells |
| 3.97E-95  | 0.319378   | 0.34  | 0.054 | 1.34E-90 | 31 | PKN1     | Immune-B cells |
| 1.33E-63  | 0.31936856 | 0.443 | 0.111 | 4.50E-59 | 31 | BMPR2    | Immune-B cells |
| 4.39E-61  | 0.31935934 | 0.404 | 0.099 | 1.48E-56 | 31 | R4435-2H | Immune-B cells |
| 1.88E-72  | 0.3193523  | 0.294 | 0.052 | 6.34E-68 | 31 | CDC42EP1 | Immune-B cells |
| 5.62E-107 | 0.31934703 | 0.348 | 0.05  | #####    | 31 | ZEB1     | Immune-B cells |
| 2.89E-106 | 0.31931993 | 0.309 | 0.041 | #####    | 31 | GRB10    | Immune-B cells |
| 5.16E-63  | 0.31905455 | 0.45  | 0.116 | 1.74E-58 | 31 | ILF2     | Immune-B cells |
| 1.83E-38  | 0.31883209 | 0.684 | 0.278 | 6.18E-34 | 31 | LMNA     | Immune-B cells |
| 8.49E-39  | 0.31871776 | 0.794 | 0.337 | 2.86E-34 | 31 | SAP18    | Immune-B cells |
| 1.45E-64  | 0.31854576 | 0.273 | 0.05  | 4.87E-60 | 31 | TSPAN15  | Immune-B cells |
| 6.29E-49  | 0.31707673 | 0.482 | 0.152 | 2.12E-44 | 31 | FLOT1    | Immune-B cells |
| 2.67E-63  | 0.31651235 | 0.28  | 0.053 | 9.00E-59 | 31 | CFAP20   | Immune-B cells |
| 4.83E-45  | 0.31577892 | 0.83  | 0.335 | 1.63E-40 | 31 | C4orf3   | Immune-B cells |
| 6.89E-76  | 0.31566773 | 0.337 | 0.063 | 2.32E-71 | 31 | ABL2     | Immune-B cells |
| 3.41E-63  | 0.31519003 | 0.34  | 0.073 | 1.15E-58 | 31 | RASAL2   | Immune-B cells |
| 2.75E-204 | 0.31423192 | 0.613 | 0.08  | #####    | 31 | PODXL    | Immune-B cells |
| 3.48E-24  | 0.31415552 | 0.961 | 0.554 | 1.17E-19 | 31 | POLR2L   | Immune-B cells |
| 7.24E-31  | 0.31388227 | 0.876 | 0.428 | 2.44E-26 | 31 | TPI1     | Immune-B cells |
| 1.87E-56  | 0.31340676 | 0.578 | 0.18  | 6.32E-52 | 31 | EIF3M    | Immune-B cells |
| 1.10E-67  | 0.31212522 | 0.443 | 0.107 | 3.70E-63 | 31 | PTPN12   | Immune-B cells |
| 9.85E-43  | 0.31191753 | 0.752 | 0.3   | 3.32E-38 | 31 | CLTA     | Immune-B cells |
| 2.70E-48  | 0.31174582 | 0.777 | 0.3   | 9.10E-44 | 31 | ADD45GIP | Immune-B cells |
| 8.32E-57  | 0.31166107 | 0.411 | 0.107 | 2.80E-52 | 31 | BNIP2    | Immune-B cells |
| 5.76E-44  | 0.31132225 | 0.833 | 0.35  | 1.94E-39 | 31 | WDR83OS  | Immune-B cells |

|           |            |       |       |          |    |          |                |
|-----------|------------|-------|-------|----------|----|----------|----------------|
| 1.67E-65  | 0.31093072 | 0.305 | 0.058 | 5.61E-61 | 31 | FILIP1L  | Immune-B cells |
| 5.60E-51  | 0.31069365 | 0.557 | 0.182 | 1.89E-46 | 31 | LAMTOR1  | Immune-B cells |
| 1.60E-53  | 0.31045638 | 0.457 | 0.129 | 5.38E-49 | 31 | MYO1B    | Immune-B cells |
| 2.52E-87  | 0.30969666 | 0.355 | 0.06  | 8.49E-83 | 31 | MEIS2    | Immune-B cells |
| 4.81E-51  | 0.30942399 | 0.358 | 0.092 | 1.62E-46 | 31 | CSRP1    | Immune-B cells |
| 4.52E-48  | 0.30876126 | 0.723 | 0.273 | 1.52E-43 | 31 | ACTN4    | Immune-B cells |
| 5.98E-42  | 0.30837533 | 0.73  | 0.293 | 2.01E-37 | 31 | PDIA3    | Immune-B cells |
| 3.07E-45  | 0.30700511 | 0.479 | 0.158 | 1.03E-40 | 31 | TCP1     | Immune-B cells |
| 2.67E-62  | 0.30698585 | 0.34  | 0.075 | 9.00E-58 | 31 | MPG      | Immune-B cells |
| 9.06E-53  | 0.30600957 | 0.457 | 0.133 | 3.05E-48 | 31 | RALY     | Immune-B cells |
| 2.85E-43  | 0.30501095 | 0.73  | 0.287 | 9.60E-39 | 31 | ATP5C1   | Immune-B cells |
| 4.53E-59  | 0.3046839  | 0.465 | 0.128 | 1.53E-54 | 31 | MRPL32   | Immune-B cells |
| 1.17E-46  | 0.3041892  | 0.663 | 0.247 | 3.96E-42 | 31 | CHMP5    | Immune-B cells |
| 1.59E-65  | 0.30388612 | 0.401 | 0.093 | 5.37E-61 | 31 | UBE2J1   | Immune-B cells |
| 2.57E-80  | 0.30366072 | 0.33  | 0.058 | 8.67E-76 | 31 | PDCL     | Immune-B cells |
| 5.04E-85  | 0.30355068 | 0.27  | 0.039 | 1.70E-80 | 31 | LRRC8A   | Immune-B cells |
| 5.09E-133 | 0.30345623 | 0.383 | 0.049 | #####    | 31 | FLT1     | Immune-B cells |
| 7.31E-106 | 0.30277564 | 0.34  | 0.048 | #####    | 31 | LIMS2    | Immune-B cells |
| 2.41E-94  | 0.30267744 | 0.326 | 0.05  | 8.12E-90 | 31 | CARD8    | Immune-B cells |
| 2.08E-58  | 0.30232811 | 0.284 | 0.056 | 7.01E-54 | 31 | EFNB2    | Immune-B cells |
| 3.07E-54  | 0.30231772 | 0.589 | 0.184 | 1.04E-49 | 31 | TNFSF10  | Immune-B cells |
| 1.56E-44  | 0.3022739  | 0.426 | 0.132 | 5.26E-40 | 31 | SLC3A2   | Immune-B cells |
| 1.24E-50  | 0.30215802 | 0.613 | 0.209 | 4.16E-46 | 31 | COPE     | Immune-B cells |
| 1.15E-29  | 0.30135069 | 0.904 | 0.454 | 3.86E-25 | 31 | BTG1     | Immune-B cells |
| 2.04E-132 | 0.30101388 | 0.255 | 0.024 | #####    | 31 | SH2B3    | Immune-B cells |
| 2.81E-34  | 0.30096071 | 0.77  | 0.343 | 9.48E-30 | 31 | YBX3     | Immune-B cells |
| 5.79E-60  | 0.30068564 | 0.56  | 0.168 | 1.95E-55 | 31 | LSM8     | Immune-B cells |
| 4.18E-30  | 0.30066361 | 0.826 | 0.394 | 1.41E-25 | 31 | S100A13  | Immune-B cells |
| 3.08E-52  | 0.30061418 | 0.56  | 0.182 | 1.04E-47 | 31 | RPS19BP1 | Immune-B cells |
| 1.82E-58  | 0.29980423 | 0.379 | 0.093 | 6.15E-54 | 31 | MED10    | Immune-B cells |
| 7.31E-52  | 0.29885224 | 0.571 | 0.188 | 2.46E-47 | 31 | EIF3G    | Immune-B cells |
| 4.08E-22  | 0.29884237 | 0.979 | 0.647 | 1.37E-17 | 31 | RPL22    | Immune-B cells |
| 5.52E-51  | 0.29874431 | 0.599 | 0.202 | 1.86E-46 | 31 | EIF4A1   | Immune-B cells |
| 1.16E-72  | 0.29865425 | 0.262 | 0.042 | 3.90E-68 | 31 | PIK3R3   | Immune-B cells |
| 6.33E-49  | 0.29773276 | 0.599 | 0.209 | 2.13E-44 | 31 | WDR1     | Immune-B cells |
| 5.61E-55  | 0.29681537 | 0.422 | 0.114 | 1.89E-50 | 31 | DCTN2    | Immune-B cells |
| 2.78E-71  | 0.29650227 | 0.323 | 0.061 | 9.37E-67 | 31 | KLHL5    | Immune-B cells |
| 1.46E-57  | 0.29610516 | 0.486 | 0.137 | 4.92E-53 | 31 | CKLF     | Immune-B cells |
| 7.08E-46  | 0.2959813  | 0.489 | 0.158 | 2.39E-41 | 31 | TALDO1   | Immune-B cells |
| 2.54E-54  | 0.29573762 | 0.73  | 0.262 | 8.55E-50 | 31 | RBM8A    | Immune-B cells |
| 4.73E-67  | 0.29528823 | 0.255 | 0.042 | 1.60E-62 | 31 | RBP1     | Immune-B cells |
| 2.10E-18  | 0.29516338 | 0.936 | 0.601 | 7.07E-14 | 31 | RPL23    | Immune-B cells |
| 1.05E-61  | 0.29507947 | 0.833 | 0.3   | 3.55E-57 | 31 | TIMP3    | Immune-B cells |
| 1.69E-66  | 0.29489277 | 0.447 | 0.111 | 5.69E-62 | 31 | ADRM1    | Immune-B cells |
| 9.88E-48  | 0.29462446 | 0.504 | 0.162 | 3.33E-43 | 31 | PDLIM5   | Immune-B cells |
| 1.24E-37  | 0.29418169 | 0.762 | 0.328 | 4.17E-33 | 31 | ARL6IP4  | Immune-B cells |
| 4.83E-42  | 0.29375089 | 0.656 | 0.254 | 1.63E-37 | 31 | SLC38A2  | Immune-B cells |
| 3.89E-49  | 0.29370416 | 0.525 | 0.171 | 1.31E-44 | 31 | PSMD8    | Immune-B cells |

|          |            |       |       |          |    |          |                |
|----------|------------|-------|-------|----------|----|----------|----------------|
| 8.42E-50 | 0.29343423 | 0.468 | 0.142 | 2.84E-45 | 31 | FUNDC2   | Immune-B cells |
| 3.74E-46 | 0.29279088 | 0.592 | 0.209 | 1.26E-41 | 31 | APRT     | Immune-B cells |
| 4.77E-36 | 0.29271547 | 0.574 | 0.22  | 1.61E-31 | 31 | SOCS3    | Immune-B cells |
| 1.31E-47 | 0.29243979 | 0.475 | 0.149 | 4.42E-43 | 31 | NDUFA8   | Immune-B cells |
| 1.14E-72 | 0.29219654 | 0.305 | 0.055 | 3.85E-68 | 31 | MAP3K11  | Immune-B cells |
| 1.68E-52 | 0.29212064 | 0.348 | 0.086 | 5.65E-48 | 31 | LAGE3    | Immune-B cells |
| 1.37E-44 | 0.29179231 | 0.571 | 0.202 | 4.62E-40 | 31 | PSMA2    | Immune-B cells |
| 2.02E-37 | 0.29174951 | 0.606 | 0.241 | 6.80E-33 | 31 | ESD      | Immune-B cells |
| 5.74E-46 | 0.29150317 | 0.482 | 0.156 | 1.93E-41 | 31 | CCT8     | Immune-B cells |
| 8.25E-66 | 0.29109824 | 0.344 | 0.072 | 2.78E-61 | 31 | SOCS2    | Immune-B cells |
| 1.09E-94 | 0.29050128 | 0.301 | 0.043 | 3.67E-90 | 31 | HEG1     | Immune-B cells |
| 6.03E-58 | 0.29026422 | 0.277 | 0.054 | 2.03E-53 | 31 | RPGR     | Immune-B cells |
| 1.81E-35 | 0.29008264 | 0.83  | 0.374 | 6.10E-31 | 31 | ATOX1    | Immune-B cells |
| 1.85E-48 | 0.28950135 | 0.411 | 0.119 | 6.23E-44 | 31 | TAX1BP3  | Immune-B cells |
| 2.80E-40 | 0.28949561 | 0.713 | 0.289 | 9.42E-36 | 31 | ZNHIT1   | Immune-B cells |
| 2.57E-73 | 0.28911929 | 0.365 | 0.074 | 8.66E-69 | 31 | UTP11L   | Immune-B cells |
| 1.33E-43 | 0.288557   | 0.677 | 0.259 | 4.49E-39 | 31 | SCAND1   | Immune-B cells |
| 1.45E-41 | 0.28830209 | 0.652 | 0.25  | 4.90E-37 | 31 | BCAP31   | Immune-B cells |
| 1.24E-62 | 0.28818253 | 0.252 | 0.043 | 4.19E-58 | 31 | CRNDE    | Immune-B cells |
| 1.39E-50 | 0.28801333 | 0.333 | 0.082 | 4.69E-46 | 31 | HMOX2    | Immune-B cells |
| 1.57E-53 | 0.28799078 | 0.333 | 0.079 | 5.30E-49 | 31 | PXN      | Immune-B cells |
| 2.28E-44 | 0.28736919 | 0.574 | 0.203 | 7.67E-40 | 31 | UFC1     | Immune-B cells |
| 3.76E-35 | 0.28618255 | 0.73  | 0.309 | 1.27E-30 | 31 | SELM     | Immune-B cells |
| 1.44E-51 | 0.28607864 | 0.454 | 0.132 | 4.84E-47 | 31 | JUP      | Immune-B cells |
| 1.83E-20 | 0.28509177 | 0.979 | 0.7   | 6.18E-16 | 31 | RPS26    | Immune-B cells |
| 4.39E-56 | 0.28473001 | 0.379 | 0.095 | 1.48E-51 | 31 | C11orf73 | Immune-B cells |
| 7.10E-49 | 0.2844018  | 0.461 | 0.14  | 2.39E-44 | 31 | MEF2A    | Immune-B cells |
| 5.73E-47 | 0.28428864 | 0.699 | 0.259 | 1.93E-42 | 31 | VPS28    | Immune-B cells |
| 3.70E-37 | 0.28424443 | 0.748 | 0.314 | 1.25E-32 | 31 | SEPW1    | Immune-B cells |
| 1.78E-47 | 0.28358034 | 0.415 | 0.122 | 6.00E-43 | 31 | YIPF3    | Immune-B cells |
| 7.23E-46 | 0.28268241 | 0.468 | 0.149 | 2.44E-41 | 31 | RAD23A   | Immune-B cells |
| 1.33E-61 | 0.28243594 | 0.532 | 0.149 | 4.48E-57 | 31 | TACC1    | Immune-B cells |
| 4.03E-46 | 0.28242075 | 0.681 | 0.253 | 1.36E-41 | 31 | RHEB     | Immune-B cells |
| 4.68E-36 | 0.27996635 | 0.801 | 0.351 | 1.58E-31 | 31 | SNRPD2   | Immune-B cells |
| 1.06E-47 | 0.27989166 | 0.433 | 0.129 | 3.56E-43 | 31 | EIF3D    | Immune-B cells |
| 1.05E-29 | 0.27929492 | 0.727 | 0.333 | 3.53E-25 | 31 | DNAJA1   | Immune-B cells |
| 3.97E-70 | 0.27859579 | 0.298 | 0.054 | 1.34E-65 | 31 | PGM2L1   | Immune-B cells |
| 4.59E-78 | 0.27859403 | 0.266 | 0.041 | 1.55E-73 | 31 | FAM114A1 | Immune-B cells |
| 2.52E-49 | 0.2784211  | 0.447 | 0.132 | 8.50E-45 | 31 | MGMT     | Immune-B cells |
| 1.18E-47 | 0.27827991 | 0.298 | 0.071 | 3.98E-43 | 31 | YES1     | Immune-B cells |
| 4.05E-26 | 0.27812423 | 0.897 | 0.456 | 1.36E-21 | 31 | OAZ1     | Immune-B cells |
| 1.06E-34 | 0.27806618 | 0.844 | 0.384 | 3.56E-30 | 31 | RBX1     | Immune-B cells |
| 8.54E-31 | 0.27790349 | 0.894 | 0.434 | 2.88E-26 | 31 | SUB1     | Immune-B cells |
| 1.49E-44 | 0.27785815 | 0.61  | 0.22  | 5.04E-40 | 31 | BANF1    | Immune-B cells |
| 6.41E-54 | 0.27727575 | 0.429 | 0.118 | 2.16E-49 | 31 | CCT5     | Immune-B cells |
| 1.35E-86 | 0.27630659 | 0.635 | 0.151 | 4.54E-82 | 31 | ADGRF5   | Immune-B cells |
| 4.80E-52 | 0.27602382 | 0.489 | 0.148 | 1.62E-47 | 31 | CACYBP   | Immune-B cells |
| 9.64E-54 | 0.27597554 | 0.312 | 0.071 | 3.25E-49 | 31 | RAI14    | Immune-B cells |

|          |            |       |       |          |    |          |                |
|----------|------------|-------|-------|----------|----|----------|----------------|
| 2.86E-40 | 0.27567283 | 0.833 | 0.354 | 9.63E-36 | 31 | SNRPG    | Immune-B cells |
| 1.09E-47 | 0.27541881 | 0.486 | 0.153 | 3.68E-43 | 31 | C1QBP    | Immune-B cells |
| 1.58E-43 | 0.27538087 | 0.443 | 0.139 | 5.31E-39 | 31 | PIM3     | Immune-B cells |
| 5.39E-41 | 0.27524493 | 0.33  | 0.092 | 1.82E-36 | 31 | NMT2     | Immune-B cells |
| 2.52E-74 | 0.27486662 | 0.305 | 0.053 | 8.48E-70 | 31 | TGM2     | Immune-B cells |
| 8.85E-48 | 0.27431817 | 0.39  | 0.109 | 2.98E-43 | 31 | NME1     | Immune-B cells |
| 6.13E-18 | 0.27423848 | 0.972 | 0.655 | 2.07E-13 | 31 | H3F3B    | Immune-B cells |
| 2.97E-48 | 0.27392609 | 0.436 | 0.13  | 1.00E-43 | 31 | MRPL22   | Immune-B cells |
| 7.48E-34 | 0.27374798 | 0.507 | 0.195 | 2.52E-29 | 31 | PPA1     | Immune-B cells |
| 4.36E-46 | 0.27369382 | 0.348 | 0.093 | 1.47E-41 | 31 | GTF3A    | Immune-B cells |
| 4.02E-43 | 0.27297844 | 0.638 | 0.239 | 1.35E-38 | 31 | RWDD1    | Immune-B cells |
| 2.70E-52 | 0.27255365 | 0.408 | 0.111 | 9.11E-48 | 31 | CDC26    | Immune-B cells |
| 1.29E-36 | 0.27209311 | 0.606 | 0.238 | 4.35E-32 | 31 | IQGAP1   | Immune-B cells |
| 2.45E-44 | 0.27159296 | 0.663 | 0.248 | 8.25E-40 | 31 | Sep-19   | Immune-B cells |
| 2.39E-47 | 0.27110779 | 0.521 | 0.17  | 8.04E-43 | 31 | PPIC     | Immune-B cells |
| 8.72E-63 | 0.27035427 | 0.28  | 0.052 | 2.94E-58 | 31 | SHC1     | Immune-B cells |
| 2.24E-54 | 0.27033843 | 0.582 | 0.185 | 7.54E-50 | 31 | CNIH4    | Immune-B cells |
| 1.67E-43 | 0.27005466 | 0.461 | 0.148 | 5.63E-39 | 31 | ARPC4    | Immune-B cells |
| 2.79E-49 | 0.26955391 | 0.394 | 0.108 | 9.39E-45 | 31 | NOP56    | Immune-B cells |
| 2.27E-63 | 0.26950235 | 0.376 | 0.085 | 7.65E-59 | 31 | PLEC     | Immune-B cells |
| 1.87E-47 | 0.26935848 | 0.582 | 0.2   | 6.29E-43 | 31 | SSR3     | Immune-B cells |
| 7.69E-20 | 0.26905068 | 0.954 | 0.569 | 2.59E-15 | 31 | HSP90AB1 | Immune-B cells |
| 9.87E-42 | 0.26904377 | 0.468 | 0.158 | 3.33E-37 | 31 | UBE2I    | Immune-B cells |
| 4.89E-39 | 0.26904334 | 0.674 | 0.267 | 1.65E-34 | 31 | COL18A1  | Immune-B cells |
| 9.83E-43 | 0.26877032 | 0.34  | 0.095 | 3.31E-38 | 31 | ETHE1    | Immune-B cells |
| 3.56E-55 | 0.26853181 | 0.55  | 0.169 | 1.20E-50 | 31 | PFDN4    | Immune-B cells |
| 5.89E-47 | 0.26813376 | 0.61  | 0.215 | 1.98E-42 | 31 | TXNDC17  | Immune-B cells |
| 5.71E-44 | 0.26808573 | 0.496 | 0.165 | 1.93E-39 | 31 | COMT     | Immune-B cells |
| 8.33E-32 | 0.26775216 | 0.741 | 0.338 | 2.81E-27 | 31 | SERBP1   | Immune-B cells |
| 6.34E-60 | 0.2677515  | 0.344 | 0.077 | 2.14E-55 | 31 | ABCE1    | Immune-B cells |
| 1.09E-55 | 0.26762247 | 0.504 | 0.148 | 3.68E-51 | 31 | OS9      | Immune-B cells |
| 1.21E-46 | 0.26754495 | 0.674 | 0.248 | 4.06E-42 | 31 | IL6ST    | Immune-B cells |
| 3.57E-45 | 0.26728037 | 0.355 | 0.098 | 1.20E-40 | 31 | SLC39A1  | Immune-B cells |
| 6.32E-46 | 0.26726169 | 0.684 | 0.254 | 2.13E-41 | 31 | SF3B5    | Immune-B cells |
| 3.25E-54 | 0.26690199 | 0.355 | 0.086 | 1.10E-49 | 31 | STX12    | Immune-B cells |
| 5.22E-26 | 0.26689466 | 0.833 | 0.431 | 1.76E-21 | 31 | DNAJB1   | Immune-B cells |
| 1.42E-45 | 0.26680284 | 0.652 | 0.239 | 4.78E-41 | 31 | OCIAD1   | Immune-B cells |
| 4.99E-28 | 0.26641841 | 0.833 | 0.448 | 1.68E-23 | 31 | CD74     | Immune-B cells |
| 1.74E-41 | 0.2648494  | 0.66  | 0.254 | 5.85E-37 | 31 | SSBP1    | Immune-B cells |
| 1.51E-53 | 0.26468151 | 0.28  | 0.059 | 5.10E-49 | 31 | EVA1B    | Immune-B cells |
| 3.99E-44 | 0.26455093 | 0.564 | 0.197 | 1.34E-39 | 31 | EIF3L    | Immune-B cells |
| 6.81E-57 | 0.26453877 | 0.426 | 0.112 | 2.30E-52 | 31 | IFNGR1   | Immune-B cells |
| 1.83E-49 | 0.26421761 | 0.394 | 0.108 | 6.15E-45 | 31 | ZNF22    | Immune-B cells |
| 9.11E-22 | 0.2640988  | 0.918 | 0.482 | 3.07E-17 | 31 | RPSA     | Immune-B cells |
| 1.09E-50 | 0.2637389  | 0.592 | 0.198 | 3.68E-46 | 31 | DRAP1    | Immune-B cells |
| 3.09E-39 | 0.26371283 | 0.394 | 0.12  | 1.04E-34 | 31 | PLPP1    | Immune-B cells |
| 5.59E-44 | 0.26340096 | 0.504 | 0.168 | 1.88E-39 | 31 | DYNC1LI2 | Immune-B cells |
| 2.39E-33 | 0.26300567 | 0.67  | 0.287 | 8.06E-29 | 31 | C12orf57 | Immune-B cells |

|          |            |       |       |          |    |          |                |
|----------|------------|-------|-------|----------|----|----------|----------------|
| 2.00E-31 | 0.26293976 | 0.369 | 0.125 | 6.75E-27 | 31 | BAG3     | Immune-B cells |
| 8.95E-59 | 0.26289636 | 0.259 | 0.048 | 3.01E-54 | 31 | MAPK3    | Immune-B cells |
| 9.73E-46 | 0.26250626 | 0.55  | 0.185 | 3.28E-41 | 31 | VKORC1   | Immune-B cells |
| 7.63E-62 | 0.26195444 | 0.415 | 0.101 | 2.57E-57 | 31 | GAS6     | Immune-B cells |
| 3.28E-48 | 0.26187098 | 0.33  | 0.083 | 1.10E-43 | 31 | VASP     | Immune-B cells |
| 8.05E-51 | 0.26142396 | 0.454 | 0.132 | 2.71E-46 | 31 | SIGIRR   | Immune-B cells |
| 3.27E-63 | 0.26087355 | 0.287 | 0.053 | 1.10E-58 | 31 | APOLD1   | Immune-B cells |
| 3.23E-19 | 0.26039806 | 0.986 | 0.696 | 1.09E-14 | 31 | RPL38    | Immune-B cells |
| 5.38E-35 | 0.2603846  | 0.713 | 0.3   | 1.81E-30 | 31 | HSPH1    | Immune-B cells |
| 3.75E-58 | 0.25976846 | 0.401 | 0.1   | 1.27E-53 | 31 | TSPAN14  | Immune-B cells |
| 7.08E-21 | 0.25971977 | 0.993 | 0.809 | 2.38E-16 | 31 | RPL12    | Immune-B cells |
| 1.42E-18 | 0.2596701  | 0.929 | 0.561 | 4.78E-14 | 31 | CD9      | Immune-B cells |
| 8.58E-64 | 0.25911817 | 0.259 | 0.045 | 2.89E-59 | 31 | NTAN1    | Immune-B cells |
| 8.70E-43 | 0.25890529 | 0.539 | 0.187 | 2.93E-38 | 31 | UBE2D2   | Immune-B cells |
| 5.14E-59 | 0.25869641 | 0.443 | 0.116 | 1.73E-54 | 31 | FERMT2   | Immune-B cells |
| 6.93E-49 | 0.25853744 | 0.553 | 0.182 | 2.33E-44 | 31 | ANP32B   | Immune-B cells |
| 9.57E-43 | 0.25817913 | 0.401 | 0.122 | 3.22E-38 | 31 | CCT7     | Immune-B cells |
| 1.37E-49 | 0.25815666 | 0.369 | 0.098 | 4.62E-45 | 31 | PSMD13   | Immune-B cells |
| 7.76E-44 | 0.25766942 | 0.514 | 0.175 | 2.61E-39 | 31 | PSMC5    | Immune-B cells |
| 2.20E-79 | 0.25735367 | 0.262 | 0.039 | 7.42E-75 | 31 | CDK17    | Immune-B cells |
| 2.44E-47 | 0.25721661 | 0.479 | 0.15  | 8.22E-43 | 31 | RNASEH2C | Immune-B cells |
| 5.25E-36 | 0.25704594 | 0.319 | 0.095 | 1.77E-31 | 31 | AIDA     | Immune-B cells |
| 6.70E-42 | 0.2570386  | 0.333 | 0.093 | 2.26E-37 | 31 | CREG1    | Immune-B cells |
| 1.13E-52 | 0.25680284 | 0.443 | 0.125 | 3.80E-48 | 31 | FAM195B  | Immune-B cells |
| 5.50E-61 | 0.25658405 | 0.369 | 0.085 | 1.85E-56 | 31 | GLRX3    | Immune-B cells |
| 1.31E-46 | 0.25639514 | 0.461 | 0.143 | 4.41E-42 | 31 | TOMM22   | Immune-B cells |
| 1.38E-33 | 0.2561574  | 0.702 | 0.299 | 4.64E-29 | 31 | NDUFA6   | Immune-B cells |
| 5.91E-30 | 0.25542742 | 0.812 | 0.374 | 1.99E-25 | 31 | ERH      | Immune-B cells |
| 3.60E-36 | 0.25526205 | 0.592 | 0.232 | 1.21E-31 | 31 | MRPL52   | Immune-B cells |
| 8.27E-46 | 0.25525661 | 0.571 | 0.196 | 2.79E-41 | 31 | EIF6     | Immune-B cells |
| 3.34E-50 | 0.25518414 | 0.316 | 0.075 | 1.12E-45 | 31 | SEPN1    | Immune-B cells |
| 5.87E-64 | 0.25496917 | 0.287 | 0.054 | 1.98E-59 | 31 | NMI      | Immune-B cells |
| 1.41E-18 | 0.25421782 | 0.947 | 0.554 | 4.76E-14 | 31 | PFDN5    | Immune-B cells |
| 1.05E-33 | 0.25419648 | 0.571 | 0.229 | 3.55E-29 | 31 | CAPNS1   | Immune-B cells |
| 1.10E-32 | 0.25405574 | 0.812 | 0.361 | 3.70E-28 | 31 | NDUFC2   | Immune-B cells |
| 1.83E-38 | 0.25388381 | 0.656 | 0.259 | 6.16E-34 | 31 | TRAPPC1  | Immune-B cells |
| 4.92E-55 | 0.25372317 | 0.294 | 0.063 | 1.66E-50 | 31 | TRIM47   | Immune-B cells |
| 3.14E-41 | 0.25360374 | 0.461 | 0.153 | 1.06E-36 | 31 | SUPT4H1  | Immune-B cells |
| 1.87E-33 | 0.25313926 | 0.699 | 0.299 | 6.31E-29 | 31 | MZT2B    | Immune-B cells |
| 3.03E-44 | 0.25295965 | 0.376 | 0.107 | 1.02E-39 | 31 | MRPS15   | Immune-B cells |
| 7.66E-44 | 0.25282104 | 0.606 | 0.219 | 2.58E-39 | 31 | FAM96B   | Immune-B cells |
| 1.19E-46 | 0.25257884 | 0.571 | 0.195 | 4.00E-42 | 31 | PCNP     | Immune-B cells |
| 3.85E-17 | 0.25249372 | 0.968 | 0.63  | 1.30E-12 | 31 | RPS11    | Immune-B cells |
| 2.24E-16 | 0.25215574 | 0.979 | 0.722 | 7.54E-12 | 31 | FAU      | Immune-B cells |
| 7.94E-42 | 0.25206208 | 0.369 | 0.108 | 2.68E-37 | 31 | MCTS1    | Immune-B cells |
| 1.61E-17 | 0.25164034 | 0.986 | 0.731 | 5.43E-13 | 31 | RPL6     | Immune-B cells |
| 1.29E-41 | 0.25074211 | 0.628 | 0.234 | 4.34E-37 | 31 | HNRNPA0  | Immune-B cells |
| 3.97E-48 | 0.25055413 | 0.28  | 0.063 | 1.34E-43 | 31 | GALNT1   | Immune-B cells |

|           |            |       |       |          |    |          |                |
|-----------|------------|-------|-------|----------|----|----------|----------------|
| 1.47E-40  | 0.25052161 | 0.511 | 0.18  | 4.96E-36 | 31 | PDCD5    | Immune-B cells |
| 1.98E-39  | 0.25024891 | 0.415 | 0.135 | 6.68E-35 | 31 | EMC4     | Immune-B cells |
| 2.54E-18  | 0.25010967 | 0.982 | 0.771 | 8.55E-14 | 31 | RPS24    | Immune-B cells |
| 1.33E-188 | 2.40613692 | 0.989 | 0.381 | #####    | 32 | MT1G     | Immune-B cells |
| 0         | 2.29817769 | 0.911 | 0.148 | 0        | 32 | MT1H     | Immune-B cells |
| 2.87E-180 | 2.28448861 | 0.986 | 0.403 | #####    | 32 | MT1X     | Immune-B cells |
| 9.69E-208 | 1.92814585 | 0.954 | 0.259 | #####    | 32 | MT1F     | Immune-B cells |
| 7.99E-146 | 1.75142201 | 0.964 | 0.419 | #####    | 32 | MT1E     | Immune-B cells |
| 4.47E-174 | 1.71662931 | 0.729 | 0.143 | #####    | 32 | MT1M     | Immune-B cells |
| 1.99E-212 | 1.66693878 | 0.996 | 0.301 | #####    | 32 | HLA-DRA  | Immune-B cells |
| 0         | 1.62947678 | 0.957 | 0.163 | 0        | 32 | HLA-DPB1 | Immune-B cells |
| 8.06E-122 | 1.6064883  | 0.989 | 0.642 | #####    | 32 | MT2A     | Immune-B cells |
| 0         | 1.5556982  | 0.889 | 0.127 | 0        | 32 | HLA-DRB5 | Immune-B cells |
| 2.57E-99  | 1.48273366 | 0.75  | 0.233 | 8.67E-95 | 32 | APOE     | Immune-B cells |
| 4.24E-156 | 1.44249501 | 0.996 | 0.447 | #####    | 32 | CD74     | Immune-B cells |
| 1.88E-77  | 1.42784458 | 0.886 | 0.504 | 6.33E-73 | 32 | CLU      | Immune-B cells |
| 0         | 1.32041955 | 0.546 | 0.032 | 0        | 32 | CCL3     | Immune-B cells |
| 1.67E-249 | 1.31928083 | 0.882 | 0.157 | #####    | 32 | HLA-DPA1 | Immune-B cells |
| 1.18E-112 | 1.30561527 | 0.836 | 0.271 | #####    | 32 | PIGR     | Immune-B cells |
| 1.46E-240 | 1.30163085 | 0.454 | 0.042 | #####    | 32 | RBP4     | Immune-B cells |
| 1.74E-206 | 1.28628149 | 0.475 | 0.053 | #####    | 32 | APOC1    | Immune-B cells |
| 0         | 1.24226595 | 0.811 | 0.072 | 0        | 32 | TYROBP   | Immune-B cells |
| 0         | 1.22883827 | 0.725 | 0.042 | 0        | 32 | HLA-DQA2 | Immune-B cells |
| 0         | 1.20808771 | 0.729 | 0.066 | 0        | 32 | RGS1     | Immune-B cells |
| 8.46E-194 | 1.14929875 | 0.964 | 0.24  | #####    | 32 | HLA-DRB1 | Immune-B cells |
| 2.17E-304 | 1.14455163 | 0.761 | 0.092 | #####    | 32 | LGALS2   | Immune-B cells |
| 2.41E-222 | 1.10466536 | 0.761 | 0.119 | #####    | 32 | ACSM2A   | Immune-B cells |
| 8.19E-173 | 1.07149294 | 0.564 | 0.088 | #####    | 32 | FHL1     | Immune-B cells |
| 2.63E-196 | 1.06951604 | 0.739 | 0.126 | #####    | 32 | VCAM1    | Immune-B cells |
| 0         | 1.05783279 | 0.782 | 0.097 | 0        | 32 | HLA-DQB1 | Immune-B cells |
| 3.31E-76  | 1.0513315  | 0.868 | 0.412 | 1.11E-71 | 32 | CRYAB    | Immune-B cells |
| 1.18E-114 | 1.00793334 | 1     | 0.803 | #####    | 32 | FTH1     | Immune-B cells |
| 7.08E-95  | 1.0055852  | 1     | 0.77  | 2.39E-90 | 32 | FTL      | Immune-B cells |
| 4.69E-86  | 0.99767442 | 0.818 | 0.29  | 1.58E-81 | 32 | MMP7     | Immune-B cells |
| 0         | 0.99564457 | 0.4   | 0.014 | 0        | 32 | CCL3L3   | Immune-B cells |
| 8.46E-140 | 0.97924539 | 0.693 | 0.156 | #####    | 32 | FAM134B  | Immune-B cells |
| 4.09E-227 | 0.94352605 | 0.371 | 0.03  | #####    | 32 | REG1A    | Immune-B cells |
| 2.75E-87  | 0.9411856  | 0.957 | 0.508 | 9.28E-83 | 32 | HLA-B    | Immune-B cells |
| 3.16E-103 | 0.93809654 | 0.996 | 0.799 | 1.07E-98 | 32 | TMSB10   | Immune-B cells |
| 2.63E-191 | 0.93523084 | 0.614 | 0.09  | #####    | 32 | NAT8     | Immune-B cells |
| 2.03E-118 | 0.93184223 | 0.757 | 0.21  | #####    | 32 | MEM176   | Immune-B cells |
| 1.55E-123 | 0.91157728 | 0.814 | 0.213 | #####    | 32 | PDZK1IP1 | Immune-B cells |
| 7.25E-193 | 0.90301264 | 0.586 | 0.082 | #####    | 32 | PTN      | Immune-B cells |
| 0         | 0.89988961 | 0.607 | 0.047 | 0        | 32 | FCER1G   | Immune-B cells |
| 7.47E-70  | 0.88859576 | 0.732 | 0.266 | 2.52E-65 | 32 | CRIP1    | Immune-B cells |
| 1.69E-120 | 0.88437389 | 0.746 | 0.197 | #####    | 32 | MEM176   | Immune-B cells |
| 1.54E-228 | 0.87935267 | 0.661 | 0.087 | #####    | 32 | ACSM2B   | Immune-B cells |
| 5.97E-226 | 0.87870281 | 0.507 | 0.053 | #####    | 32 | LYZ      | Immune-B cells |

|           |            |       |       |          |    |          |                |
|-----------|------------|-------|-------|----------|----|----------|----------------|
| 0         | 0.87579248 | 0.564 | 0.047 | 0        | 32 | C3       | Immune-B cells |
| 1.13E-97  | 0.8752213  | 0.932 | 0.374 | 3.79E-93 | 32 | GPX1     | Immune-B cells |
| 2.82E-142 | 0.87053092 | 0.811 | 0.186 | #####    | 32 | GATM     | Immune-B cells |
| 2.90E-96  | 0.86414031 | 0.868 | 0.314 | 9.78E-92 | 32 | CXCL14   | Immune-B cells |
| 3.46E-118 | 0.86213844 | 0.721 | 0.184 | #####    | 32 | TNFSF10  | Immune-B cells |
| 7.39E-81  | 0.84905526 | 0.896 | 0.396 | 2.49E-76 | 32 | NPC2     | Immune-B cells |
| 2.37E-159 | 0.84814558 | 0.607 | 0.103 | #####    | 32 | C19orf33 | Immune-B cells |
| 7.87E-306 | 0.84685994 | 0.686 | 0.073 | #####    | 32 | HLA-DQA1 | Immune-B cells |
| 3.72E-79  | 0.83813393 | 0.95  | 0.504 | 1.25E-74 | 32 | CST3     | Immune-B cells |
| 2.13E-51  | 0.82018643 | 0.825 | 0.454 | 7.17E-47 | 32 | ADIRF    | Immune-B cells |
| 1.96E-170 | 0.80729792 | 0.604 | 0.095 | #####    | 32 | RBP5     | Immune-B cells |
| 3.67E-100 | 0.80030496 | 0.904 | 0.303 | 1.24E-95 | 32 | VIM      | Immune-B cells |
| 5.36E-292 | 0.7876781  | 0.5   | 0.042 | #####    | 32 | FTCD     | Immune-B cells |
| 1.69E-71  | 0.78161935 | 0.736 | 0.278 | 5.70E-67 | 32 | OCIAD2   | Immune-B cells |
| 9.92E-119 | 0.78073731 | 0.604 | 0.125 | #####    | 32 | SERPINA1 | Immune-B cells |
| 0         | 0.77521225 | 0.361 | 0.016 | 0        | 32 | C1QB     | Immune-B cells |
| 8.85E-174 | 0.7538435  | 0.711 | 0.121 | #####    | 32 | CXCR4    | Immune-B cells |
| 0         | 0.75312702 | 0.375 | 0.022 | 0        | 32 | C1QA     | Immune-B cells |
| 7.22E-79  | 0.7483599  | 0.911 | 0.365 | 2.43E-74 | 32 | CYBA     | Immune-B cells |
| 3.83E-89  | 0.74665273 | 0.789 | 0.243 | 1.29E-84 | 32 | IL32     | Immune-B cells |
| 1.16E-48  | 0.74045447 | 0.811 | 0.347 | 3.90E-44 | 32 | GPX3     | Immune-B cells |
| 9.15E-93  | 0.7368698  | 0.793 | 0.25  | 3.08E-88 | 32 | SGK1     | Immune-B cells |
| 2.62E-74  | 0.73592517 | 0.996 | 0.669 | 8.84E-70 | 32 | RPS2     | Immune-B cells |
| 1.35E-227 | 0.73518742 | 0.557 | 0.064 | #####    | 32 | ANPEP    | Immune-B cells |
| 1.02E-177 | 0.73436892 | 0.539 | 0.074 | #####    | 32 | LRP2     | Immune-B cells |
| 0         | 0.73208307 | 0.336 | 0.017 | 0        | 32 | CCL4L2   | Immune-B cells |
| 1.22E-117 | 0.70153657 | 0.739 | 0.177 | #####    | 32 | UGT2B7   | Immune-B cells |
| 4.50E-118 | 0.69698679 | 0.664 | 0.15  | #####    | 32 | CLIC4    | Immune-B cells |
| 3.10E-151 | 0.68352651 | 0.629 | 0.114 | #####    | 32 | HLA-DMA  | Immune-B cells |
| 1.09E-219 | 0.68068168 | 0.439 | 0.043 | #####    | 32 | HRCT1    | Immune-B cells |
| 3.08E-64  | 0.68031803 | 0.961 | 0.626 | 1.04E-59 | 32 | RPS5     | Immune-B cells |
| 8.78E-52  | 0.67018813 | 0.914 | 0.533 | 2.96E-47 | 32 | KLF6     | Immune-B cells |
| 3.26E-59  | 0.66171779 | 0.893 | 0.443 | 1.10E-54 | 32 | GPX4     | Immune-B cells |
| 3.18E-98  | 0.65579923 | 0.689 | 0.186 | 1.07E-93 | 32 | CTSB     | Immune-B cells |
| 8.32E-303 | 0.65504748 | 0.425 | 0.029 | #####    | 32 | MS4A6A   | Immune-B cells |
| 6.88E-53  | 0.65355634 | 0.839 | 0.404 | 2.32E-48 | 32 | TXN      | Immune-B cells |
| 1.65E-108 | 0.65278622 | 0.457 | 0.082 | #####    | 32 | S100A1   | Immune-B cells |
| 4.27E-151 | 0.65124508 | 0.532 | 0.082 | #####    | 32 | TMEM27   | Immune-B cells |
| 5.15E-56  | 0.64945362 | 0.929 | 0.479 | 1.73E-51 | 32 | PFN1     | Immune-B cells |
| 1.41E-137 | 0.64117834 | 0.511 | 0.083 | #####    | 32 | AMN      | Immune-B cells |
| 7.64E-226 | 0.63926348 | 0.675 | 0.088 | #####    | 32 | AIF1     | Immune-B cells |
| 1.84E-91  | 0.63724668 | 0.736 | 0.204 | 6.20E-87 | 32 | MGST1    | Immune-B cells |
| 2.85E-76  | 0.6287454  | 0.996 | 0.861 | 9.61E-72 | 32 | RPL10    | Immune-B cells |
| 1.17E-81  | 0.62163652 | 0.65  | 0.186 | 3.93E-77 | 32 | RARRES2  | Immune-B cells |
| 7.80E-77  | 0.6200847  | 0.993 | 0.793 | 2.63E-72 | 32 | RPLP2    | Immune-B cells |
| 5.61E-72  | 0.6194632  | 1     | 0.788 | 1.89E-67 | 32 | RPS15A   | Immune-B cells |
| 1.29E-80  | 0.61683511 | 0.729 | 0.231 | 4.33E-76 | 32 | DAB2     | Immune-B cells |
| 1.88E-54  | 0.61679436 | 0.939 | 0.555 | 6.33E-50 | 32 | GNB2L1   | Immune-B cells |

|           |            |       |       |          |    |          |                |
|-----------|------------|-------|-------|----------|----|----------|----------------|
| 3.76E-260 | 0.60985128 | 0.468 | 0.04  | #####    | 32 | LST1     | Immune-B cells |
| 3.56E-76  | 0.60745174 | 0.621 | 0.18  | 1.20E-71 | 32 | ERRF1    | Immune-B cells |
| 2.47E-55  | 0.60689172 | 0.432 | 0.118 | 8.31E-51 | 32 | NNMT     | Immune-B cells |
| 1.06E-129 | 0.60112828 | 0.529 | 0.092 | #####    | 32 | C1orf186 | Immune-B cells |
| 3.49E-53  | 0.59581655 | 0.975 | 0.66  | 1.17E-48 | 32 | RPS3     | Immune-B cells |
| 3.55E-56  | 0.59519769 | 0.979 | 0.638 | 1.20E-51 | 32 | UBA52    | Immune-B cells |
| 7.99E-70  | 0.59259323 | 1     | 0.843 | 2.69E-65 | 32 | RPS14    | Immune-B cells |
| 3.23E-172 | 0.59105231 | 0.329 | 0.03  | #####    | 32 | L1-1143G | Immune-B cells |
| 3.60E-54  | 0.59061922 | 0.982 | 0.645 | 1.21E-49 | 32 | RPS16    | Immune-B cells |
| 7.45E-128 | 0.59056716 | 0.45  | 0.07  | #####    | 32 | DAMTS9-A | Immune-B cells |
| 4.40E-148 | 0.59017858 | 0.471 | 0.067 | #####    | 32 | SEMA5A   | Immune-B cells |
| 8.57E-267 | 0.58990611 | 0.296 | 0.016 | #####    | 32 | FCER1A   | Immune-B cells |
| 2.80E-66  | 0.58889683 | 0.811 | 0.309 | 9.45E-62 | 32 | NFKBIA   | Immune-B cells |
| 7.78E-131 | 0.58809751 | 0.689 | 0.139 | #####    | 32 | SRGN     | Immune-B cells |
| 1.32E-53  | 0.5871     | 0.954 | 0.591 | 4.46E-49 | 32 | RPL30    | Immune-B cells |
| 2.51E-77  | 0.58373019 | 0.629 | 0.179 | 8.45E-73 | 32 | SLC3A1   | Immune-B cells |
| 3.46E-45  | 0.58323087 | 0.886 | 0.482 | 1.17E-40 | 32 | RPSA     | Immune-B cells |
| 3.71E-75  | 0.58292134 | 1     | 0.87  | 1.25E-70 | 32 | RPLP1    | Immune-B cells |
| 2.91E-56  | 0.58029376 | 0.993 | 0.731 | 9.80E-52 | 32 | RPS4X    | Immune-B cells |
| 2.19E-70  | 0.57578865 | 0.996 | 0.843 | 7.37E-66 | 32 | RPS19    | Immune-B cells |
| 5.84E-60  | 0.57520906 | 0.993 | 0.732 | 1.97E-55 | 32 | RPL19    | Immune-B cells |
| 3.01E-84  | 0.57248335 | 0.646 | 0.177 | 1.01E-79 | 32 | MARCKS   | Immune-B cells |
| 8.83E-70  | 0.57011077 | 1     | 0.881 | 2.97E-65 | 32 | RPS18    | Immune-B cells |
| 2.37E-44  | 0.56675845 | 0.746 | 0.335 | 7.97E-40 | 32 | KRT18    | Immune-B cells |
| 1.04E-67  | 0.56450941 | 0.711 | 0.244 | 3.49E-63 | 32 | SPATS2L  | Immune-B cells |
| 9.68E-65  | 0.56363022 | 0.993 | 0.767 | 3.26E-60 | 32 | RPL28    | Immune-B cells |
| 5.23E-62  | 0.56262604 | 0.996 | 0.834 | 1.76E-57 | 32 | RPS8     | Immune-B cells |
| 1.16E-61  | 0.56139598 | 0.989 | 0.801 | 3.92E-57 | 32 | RPL11    | Immune-B cells |
| 1.36E-34  | 0.56052577 | 0.807 | 0.449 | 4.60E-30 | 32 | HIST1H4C | Immune-B cells |
| 1.80E-181 | 0.55923157 | 0.354 | 0.033 | #####    | 32 | ALOX5AP  | Immune-B cells |
| 3.51E-58  | 0.5577346  | 0.989 | 0.721 | 1.18E-53 | 32 | RPL27A   | Immune-B cells |
| 3.42E-47  | 0.55619226 | 0.971 | 0.63  | 1.15E-42 | 32 | RPS11    | Immune-B cells |
| 2.24E-114 | 0.55596797 | 0.646 | 0.141 | #####    | 32 | CREB5    | Immune-B cells |
| 8.08E-66  | 0.55475378 | 1     | 0.808 | 2.72E-61 | 32 | TMSB4X   | Immune-B cells |
| 2.00E-68  | 0.55212184 | 1     | 0.863 | 6.74E-64 | 32 | RPL13A   | Immune-B cells |
| 8.74E-46  | 0.55174619 | 0.907 | 0.489 | 2.95E-41 | 32 | RPLP0    | Immune-B cells |
| 7.03E-41  | 0.55168582 | 0.875 | 0.504 | 2.37E-36 | 32 | HLA-A    | Immune-B cells |
| 7.06E-58  | 0.55012783 | 0.743 | 0.279 | 2.38E-53 | 32 | TSC22D3  | Immune-B cells |
| 5.64E-48  | 0.54940136 | 0.961 | 0.629 | 1.90E-43 | 32 | RPS7     | Immune-B cells |
| 4.52E-47  | 0.54860719 | 0.661 | 0.269 | 1.52E-42 | 32 | KRT8     | Immune-B cells |
| 6.33E-69  | 0.5472821  | 0.996 | 0.862 | 2.13E-64 | 32 | RPS28    | Immune-B cells |
| 8.52E-53  | 0.54678482 | 0.982 | 0.725 | 2.87E-48 | 32 | RPL18A   | Immune-B cells |
| 3.57E-83  | 0.54579838 | 0.571 | 0.147 | 1.20E-78 | 32 | LY6E     | Immune-B cells |
| 3.41E-172 | 0.54214845 | 0.271 | 0.021 | #####    | 32 | MSR1     | Immune-B cells |
| 4.51E-74  | 0.5411284  | 0.621 | 0.183 | 1.52E-69 | 32 | CTSC     | Immune-B cells |
| 1.80E-210 | 0.54005557 | 0.446 | 0.045 | #####    | 32 | BNC2     | Immune-B cells |
| 4.46E-61  | 0.53936638 | 1     | 0.788 | 1.50E-56 | 32 | TPT1     | Immune-B cells |
| 5.79E-47  | 0.5384755  | 0.975 | 0.6   | 1.95E-42 | 32 | RPL23    | Immune-B cells |

|           |            |       |       |          |    |          |                |
|-----------|------------|-------|-------|----------|----|----------|----------------|
| 1.00E-89  | 0.53635018 | 0.532 | 0.123 | 3.38E-85 | 32 | TYMP     | Immune-B cells |
| 1.91E-47  | 0.5360215  | 0.982 | 0.625 | 6.44E-43 | 32 | RPL29    | Immune-B cells |
| 2.98E-79  | 0.53383116 | 0.557 | 0.141 | 1.00E-74 | 32 | AKAP12   | Immune-B cells |
| 1.39E-108 | 0.53344244 | 0.525 | 0.103 | #####    | 32 | PDZK1    | Immune-B cells |
| 1.85E-82  | 0.53155642 | 0.529 | 0.131 | 6.24E-78 | 32 | AKR1A1   | Immune-B cells |
| 8.22E-79  | 0.53052222 | 0.529 | 0.134 | 2.77E-74 | 32 | PLA2G16  | Immune-B cells |
| 4.64E-279 | 0.5295708  | 0.307 | 0.017 | #####    | 32 | IGSF6    | Immune-B cells |
| 1.84E-50  | 0.5293471  | 0.993 | 0.711 | 6.21E-46 | 32 | RPL37    | Immune-B cells |
| 7.55E-93  | 0.52925481 | 0.554 | 0.13  | 2.54E-88 | 32 | ALDH2    | Immune-B cells |
| 1.61E-45  | 0.52874017 | 0.757 | 0.341 | 5.42E-41 | 32 | EZR      | Immune-B cells |
| 4.59E-52  | 0.52700779 | 0.986 | 0.712 | 1.55E-47 | 32 | RPS13    | Immune-B cells |
| 2.90E-215 | 0.52543026 | 0.339 | 0.026 | #####    | 32 | MS4A7    | Immune-B cells |
| 5.91E-59  | 0.52460643 | 1     | 0.83  | 1.99E-54 | 32 | RPS12    | Immune-B cells |
| 1.99E-63  | 0.52397406 | 1     | 0.851 | 6.71E-59 | 32 | RPS15    | Immune-B cells |
| 1.92E-174 | 0.52273789 | 0.407 | 0.044 | #####    | 32 | LAPTM5   | Immune-B cells |
| 9.01E-66  | 0.51903488 | 1     | 0.871 | 3.04E-61 | 32 | RPL13    | Immune-B cells |
| 1.08E-50  | 0.51889989 | 0.693 | 0.266 | 3.64E-46 | 32 | TSPAN1   | Immune-B cells |
| 3.96E-183 | 0.51548175 | 0.414 | 0.044 | #####    | 32 | GLYAT    | Immune-B cells |
| 9.38E-46  | 0.51494923 | 0.982 | 0.712 | 3.16E-41 | 32 | RPL15    | Immune-B cells |
| 1.34E-156 | 0.51401485 | 0.296 | 0.027 | #####    | 32 | SLC17A3  | Immune-B cells |
| 2.56E-69  | 0.51363145 | 1     | 0.906 | 8.64E-65 | 32 | RPS29    | Immune-B cells |
| 7.79E-52  | 0.51094572 | 1     | 0.74  | 2.62E-47 | 32 | RPS3A    | Immune-B cells |
| 1.27E-71  | 0.50970348 | 0.646 | 0.196 | 4.29E-67 | 32 | C11orf54 | Immune-B cells |
| 7.26E-47  | 0.50674548 | 0.986 | 0.682 | 2.45E-42 | 32 | RPS20    | Immune-B cells |
| 2.97E-270 | 0.50662162 | 0.339 | 0.021 | #####    | 32 | MNDA     | Immune-B cells |
| 1.56E-61  | 0.50623455 | 0.639 | 0.207 | 5.27E-57 | 32 | INC01320 | Immune-B cells |
| 5.12E-127 | 0.5059565  | 0.364 | 0.047 | #####    | 32 | MIOX     | Immune-B cells |
| 4.14E-74  | 0.50550488 | 0.414 | 0.089 | 1.40E-69 | 32 | TNFAIP3  | Immune-B cells |
| 9.27E-47  | 0.50340202 | 0.804 | 0.351 | 3.12E-42 | 32 | EEF1B2   | Immune-B cells |
| 2.08E-38  | 0.50334749 | 0.975 | 0.634 | 7.02E-34 | 32 | RPL10A   | Immune-B cells |
| 1.44E-57  | 0.50291566 | 0.996 | 0.834 | 4.85E-53 | 32 | RPS23    | Immune-B cells |
| 1.48E-61  | 0.50252852 | 0.604 | 0.194 | 5.00E-57 | 32 | UGCG     | Immune-B cells |
| 2.84E-76  | 0.50234681 | 0.314 | 0.055 | 9.58E-72 | 32 | CXCL1    | Immune-B cells |
| 2.38E-70  | 0.50119354 | 0.521 | 0.142 | 8.01E-66 | 32 | IMPA2    | Immune-B cells |
| 7.30E-129 | 0.49755377 | 0.332 | 0.039 | #####    | 32 | CCL4     | Immune-B cells |
| 2.30E-118 | 0.49274181 | 0.421 | 0.066 | #####    | 32 | AKR1C3   | Immune-B cells |
| 2.39E-41  | 0.49266538 | 0.961 | 0.619 | 8.05E-37 | 32 | RPL14    | Immune-B cells |
| 2.07E-39  | 0.49187279 | 0.879 | 0.459 | 6.97E-35 | 32 | HLA-C    | Immune-B cells |
| 1.54E-55  | 0.48975677 | 0.636 | 0.221 | 5.20E-51 | 32 | CAPG     | Immune-B cells |
| 1.00E-99  | 0.48957403 | 0.436 | 0.079 | 3.37E-95 | 32 | AK4      | Immune-B cells |
| 3.25E-39  | 0.48808914 | 0.971 | 0.599 | 1.10E-34 | 32 | RPL27    | Immune-B cells |
| 2.01E-31  | 0.4864229  | 0.896 | 0.543 | 6.77E-27 | 32 | CD63     | Immune-B cells |
| 6.67E-172 | 0.48629072 | 0.461 | 0.056 | #####    | 32 | UGT2A3   | Immune-B cells |
| 5.86E-78  | 0.48399642 | 0.607 | 0.168 | 1.97E-73 | 32 | ARPC1B   | Immune-B cells |
| 7.89E-74  | 0.48263913 | 0.511 | 0.129 | 2.66E-69 | 32 | IGFBP6   | Immune-B cells |
| 2.27E-45  | 0.48142892 | 0.982 | 0.764 | 7.64E-41 | 32 | RPL35A   | Immune-B cells |
| 1.28E-117 | 0.47750205 | 0.45  | 0.075 | #####    | 32 | PLXDC2   | Immune-B cells |
| 1.76E-39  | 0.47746084 | 0.907 | 0.481 | 5.94E-35 | 32 | RAC1     | Immune-B cells |

|           |            |       |       |          |    |          |                |
|-----------|------------|-------|-------|----------|----|----------|----------------|
| 5.01E-119 | 0.47692203 | 0.421 | 0.065 | #####    | 32 | CTSS     | Immune-B cells |
| 5.88E-112 | 0.47658216 | 0.382 | 0.058 | #####    | 32 | HLA-DMB  | Immune-B cells |
| 4.30E-107 | 0.47506946 | 0.45  | 0.08  | #####    | 32 | P11-14N7 | Immune-B cells |
| 6.25E-43  | 0.47375434 | 0.993 | 0.725 | 2.11E-38 | 32 | RPS17    | Immune-B cells |
| 1.47E-36  | 0.4735027  | 0.943 | 0.564 | 4.96E-32 | 32 | HINT1    | Immune-B cells |
| 1.66E-189 | 0.47265689 | 0.307 | 0.024 | #####    | 32 | RNASE6   | Immune-B cells |
| 3.79E-133 | 0.47259532 | 0.321 | 0.036 | #####    | 32 | RGS10    | Immune-B cells |
| 5.82E-140 | 0.47070011 | 0.421 | 0.057 | #####    | 32 | NAPSA    | Immune-B cells |
| 1.37E-60  | 0.47050047 | 1     | 0.943 | 4.61E-56 | 32 | RPS27    | Immune-B cells |
| 1.04E-40  | 0.47005344 | 0.739 | 0.329 | 3.49E-36 | 32 | ANXA2    | Immune-B cells |
| 8.13E-72  | 0.46961382 | 0.461 | 0.112 | 2.74E-67 | 32 | IFNGR1   | Immune-B cells |
| 4.44E-41  | 0.46923924 | 0.982 | 0.722 | 1.50E-36 | 32 | FAU      | Immune-B cells |
| 5.09E-140 | 0.46567325 | 0.432 | 0.059 | #####    | 32 | SPON2    | Immune-B cells |
| 3.06E-43  | 0.46433082 | 0.4   | 0.118 | 1.03E-38 | 32 | CCL2     | Immune-B cells |
| 2.03E-34  | 0.46402221 | 0.907 | 0.559 | 6.84E-30 | 32 | LAPTM4A  | Immune-B cells |
| 1.74E-36  | 0.46314642 | 0.971 | 0.669 | 5.87E-32 | 32 | RPS9     | Immune-B cells |
| 5.25E-79  | 0.46297653 | 0.532 | 0.132 | 1.77E-74 | 32 | CARHSP1  | Immune-B cells |
| 5.43E-166 | 0.46174213 | 0.361 | 0.037 | #####    | 32 | SLC47A1  | Immune-B cells |
| 1.61E-49  | 0.46020007 | 1     | 0.869 | 5.42E-45 | 32 | RPL32    | Immune-B cells |
| 7.39E-92  | 0.46002645 | 0.414 | 0.076 | 2.49E-87 | 32 | CELF2    | Immune-B cells |
| 2.76E-119 | 0.45958746 | 0.293 | 0.034 | #####    | 32 | SAMHD1   | Immune-B cells |
| 8.18E-52  | 0.458627   | 1     | 0.892 | 2.76E-47 | 32 | B2M      | Immune-B cells |
| 1.88E-56  | 0.45599123 | 0.996 | 0.876 | 6.34E-52 | 32 | RPS27A   | Immune-B cells |
| 5.65E-87  | 0.4543158  | 0.471 | 0.101 | 1.91E-82 | 32 | B4GALT5  | Immune-B cells |
| 3.16E-95  | 0.45279479 | 0.371 | 0.062 | 1.06E-90 | 32 | VCAN     | Immune-B cells |
| 2.61E-35  | 0.45267664 | 0.954 | 0.598 | 8.79E-31 | 32 | RPL7A    | Immune-B cells |
| 7.64E-56  | 0.4525604  | 0.764 | 0.288 | 2.57E-51 | 32 | ARPC3    | Immune-B cells |
| 1.16E-145 | 0.45253219 | 0.343 | 0.038 | #####    | 32 | CYP3A5   | Immune-B cells |
| 7.91E-85  | 0.45148057 | 0.479 | 0.105 | 2.66E-80 | 32 | LRRK2    | Immune-B cells |
| 5.23E-43  | 0.45048182 | 1     | 0.82  | 1.76E-38 | 32 | RPL26    | Immune-B cells |
| 7.53E-36  | 0.44929827 | 0.836 | 0.437 | 2.54E-31 | 32 | ZFP36    | Immune-B cells |
| 2.29E-45  | 0.44842688 | 0.993 | 0.79  | 7.71E-41 | 32 | RPL23A   | Immune-B cells |
| 1.68E-32  | 0.4469025  | 0.961 | 0.632 | 5.65E-28 | 32 | MYL6     | Immune-B cells |
| 3.74E-47  | 0.44631962 | 0.996 | 0.823 | 1.26E-42 | 32 | RPL35    | Immune-B cells |
| 5.71E-39  | 0.4451835  | 0.761 | 0.354 | 1.92E-34 | 32 | VAMP8    | Immune-B cells |
| 4.98E-36  | 0.44511019 | 0.971 | 0.633 | 1.68E-31 | 32 | RPL18    | Immune-B cells |
| 6.61E-173 | 0.44270686 | 0.329 | 0.03  | #####    | 32 | CD37     | Immune-B cells |
| 1.96E-69  | 0.44264084 | 0.518 | 0.137 | 6.62E-65 | 32 | CKLF     | Immune-B cells |
| 9.33E-68  | 0.440935   | 0.461 | 0.113 | 3.14E-63 | 32 | ASS1     | Immune-B cells |
| 4.54E-47  | 0.43829271 | 0.314 | 0.077 | 1.53E-42 | 32 | ANK2     | Immune-B cells |
| 1.73E-144 | 0.43825065 | 0.414 | 0.053 | #####    | 32 | CDH2     | Immune-B cells |
| 1.77E-94  | 0.43547069 | 0.5   | 0.103 | 5.97E-90 | 32 | IGFBP4   | Immune-B cells |
| 8.55E-35  | 0.43469484 | 0.964 | 0.597 | 2.88E-30 | 32 | PPIA     | Immune-B cells |
| 2.91E-30  | 0.43406393 | 0.889 | 0.521 | 9.81E-26 | 32 | S100A10  | Immune-B cells |
| 1.84E-31  | 0.43266087 | 0.961 | 0.614 | 6.22E-27 | 32 | RPL5     | Immune-B cells |
| 3.76E-133 | 0.4309769  | 0.346 | 0.041 | #####    | 32 | DPEP1    | Immune-B cells |
| 1.04E-69  | 0.43020024 | 0.486 | 0.12  | 3.51E-65 | 32 | BIRC3    | Immune-B cells |
| 8.50E-45  | 0.42873399 | 0.736 | 0.296 | 2.86E-40 | 32 | SMIM24   | Immune-B cells |

|           |            |       |       |          |    |         |                |
|-----------|------------|-------|-------|----------|----|---------|----------------|
| 8.63E-93  | 0.42494685 | 0.314 | 0.046 | 2.91E-88 | 32 | SLC13A1 | Immune-B cells |
| 1.38E-45  | 0.42432389 | 0.693 | 0.276 | 4.66E-41 | 32 | TUBA1B  | Immune-B cells |
| 1.95E-71  | 0.42342026 | 0.339 | 0.065 | 6.55E-67 | 32 | FYB     | Immune-B cells |
| 5.36E-62  | 0.42334839 | 0.593 | 0.181 | 1.80E-57 | 32 | ITGB8   | Immune-B cells |
| 2.77E-79  | 0.42325097 | 0.382 | 0.076 | 9.32E-75 | 32 | LPIN2   | Immune-B cells |
| 7.00E-60  | 0.42233917 | 0.461 | 0.121 | 2.36E-55 | 32 | CXCL2   | Immune-B cells |
| 8.19E-31  | 0.42095137 | 0.914 | 0.563 | 2.76E-26 | 32 | S100A11 | Immune-B cells |
| 1.38E-45  | 0.42038145 | 0.582 | 0.215 | 4.63E-41 | 32 | JADE1   | Immune-B cells |
| 8.36E-39  | 0.4202975  | 0.986 | 0.764 | 2.82E-34 | 32 | RPL31   | Immune-B cells |
| 2.42E-37  | 0.41954518 | 1     | 0.717 | 8.15E-33 | 32 | RPL9    | Immune-B cells |
| 4.53E-31  | 0.41951612 | 0.914 | 0.544 | 1.53E-26 | 32 | EEF1D   | Immune-B cells |
| 4.76E-72  | 0.41846184 | 0.407 | 0.091 | 1.60E-67 | 32 | CITED4  | Immune-B cells |
| 3.02E-31  | 0.41772412 | 0.946 | 0.554 | 1.02E-26 | 32 | PFDN5   | Immune-B cells |
| 2.04E-49  | 0.41753633 | 0.586 | 0.204 | 6.88E-45 | 32 | NFIB    | Immune-B cells |
| 3.91E-31  | 0.41745456 | 0.971 | 0.676 | 1.32E-26 | 32 | FOS     | Immune-B cells |
| 8.86E-114 | 0.41614364 | 0.357 | 0.049 | #####    | 32 | PRAP1   | Immune-B cells |
| 3.51E-57  | 0.41421689 | 1     | 0.952 | 1.18E-52 | 32 | RPL34   | Immune-B cells |
| 1.94E-33  | 0.41411682 | 0.968 | 0.623 | 6.52E-29 | 32 | RPS21   | Immune-B cells |
| 3.95E-36  | 0.41340788 | 0.85  | 0.422 | 1.33E-31 | 32 | EEF2    | Immune-B cells |
| 6.04E-48  | 0.41060004 | 0.568 | 0.203 | 2.03E-43 | 32 | PRELID1 | Immune-B cells |
| 5.07E-61  | 0.41009543 | 0.554 | 0.164 | 1.71E-56 | 32 | NFIA    | Immune-B cells |
| 4.45E-66  | 0.4093817  | 0.579 | 0.161 | 1.50E-61 | 32 | NUPR1   | Immune-B cells |
| 1.86E-71  | 0.40898338 | 0.439 | 0.102 | 6.25E-67 | 32 | PLIN2   | Immune-B cells |
| 4.07E-113 | 0.40691659 | 0.414 | 0.065 | #####    | 32 | BHMT    | Immune-B cells |
| 1.37E-147 | 0.40482774 | 0.425 | 0.055 | #####    | 32 | PTPRD   | Immune-B cells |
| 1.24E-29  | 0.404266   | 0.879 | 0.509 | 4.18E-25 | 32 | RHOB    | Immune-B cells |
| 2.79E-30  | 0.40412368 | 0.85  | 0.456 | 9.39E-26 | 32 | OAZ1    | Immune-B cells |
| 5.34E-42  | 0.40087581 | 0.586 | 0.223 | 1.80E-37 | 32 | GADD45A | Immune-B cells |
| 2.08E-127 | 0.40070569 | 0.4   | 0.056 | #####    | 32 | GIPC2   | Immune-B cells |
| 1.10E-39  | 0.40013193 | 0.643 | 0.267 | 3.70E-35 | 32 | MPC2    | Immune-B cells |
| 5.91E-90  | 0.39762701 | 0.411 | 0.075 | 1.99E-85 | 32 | CDH6    | Immune-B cells |
| 9.75E-66  | 0.39715702 | 0.543 | 0.149 | 3.29E-61 | 32 | EMP3    | Immune-B cells |
| 5.57E-30  | 0.39705319 | 0.925 | 0.552 | 1.88E-25 | 32 | ATP5G2  | Immune-B cells |
| 1.86E-39  | 0.39645028 | 0.518 | 0.194 | 6.27E-35 | 32 | DNPH1   | Immune-B cells |
| 1.14E-32  | 0.39535562 | 0.793 | 0.403 | 3.85E-28 | 32 | EMX2    | Immune-B cells |
| 1.54E-258 | 0.39517895 | 0.257 | 0.013 | #####    | 32 | LY86    | Immune-B cells |
| 2.64E-41  | 0.39441706 | 0.725 | 0.311 | 8.88E-37 | 32 | ZFAS1   | Immune-B cells |
| 5.43E-92  | 0.3937788  | 0.286 | 0.039 | 1.83E-87 | 32 | SLC16A9 | Immune-B cells |
| 2.36E-95  | 0.39317456 | 0.486 | 0.097 | 7.94E-91 | 32 | KCNJ15  | Immune-B cells |
| 1.73E-50  | 0.39301558 | 0.571 | 0.196 | 5.84E-46 | 32 | UBXN1   | Immune-B cells |
| 6.32E-102 | 0.39139552 | 0.379 | 0.059 | 2.13E-97 | 32 | ENPEP   | Immune-B cells |
| 7.52E-42  | 0.39094141 | 1     | 0.921 | 2.53E-37 | 32 | EEF1A1  | Immune-B cells |
| 6.07E-28  | 0.38953338 | 0.814 | 0.45  | 2.05E-23 | 32 | BTF3    | Immune-B cells |
| 1.40E-68  | 0.38933258 | 0.418 | 0.098 | 4.73E-64 | 32 | HPN     | Immune-B cells |
| 5.49E-34  | 0.38915769 | 0.789 | 0.391 | 1.85E-29 | 32 | RHOA    | Immune-B cells |
| 7.68E-64  | 0.38810035 | 0.443 | 0.11  | 2.59E-59 | 32 | COTL1   | Immune-B cells |
| 2.55E-31  | 0.38711892 | 0.9   | 0.471 | 8.59E-27 | 32 | RPL4    | Immune-B cells |
| 1.32E-28  | 0.3862097  | 0.886 | 0.503 | 4.46E-24 | 32 | NACA    | Immune-B cells |

|           |            |       |       |          |    |          |                |
|-----------|------------|-------|-------|----------|----|----------|----------------|
| 2.84E-30  | 0.38567379 | 0.721 | 0.357 | 9.57E-26 | 32 | CEBPD    | Immune-B cells |
| 3.53E-36  | 0.38503054 | 1     | 0.808 | 1.19E-31 | 32 | RPS25    | Immune-B cells |
| 2.36E-29  | 0.38367019 | 0.986 | 0.747 | 7.94E-25 | 32 | RPL7     | Immune-B cells |
| 1.56E-41  | 0.38247377 | 0.714 | 0.299 | 5.25E-37 | 32 | MZT2B    | Immune-B cells |
| 1.39E-132 | 0.38241708 | 0.3   | 0.032 | #####    | 32 | DDC      | Immune-B cells |
| 1.21E-83  | 0.3817692  | 0.368 | 0.066 | 4.07E-79 | 32 | FXYD5    | Immune-B cells |
| 3.78E-88  | 0.38116579 | 0.368 | 0.064 | 1.27E-83 | 32 | AKR1C1   | Immune-B cells |
| 2.32E-27  | 0.37920354 | 0.993 | 0.771 | 7.80E-23 | 32 | RPS24    | Immune-B cells |
| 2.26E-26  | 0.37893662 | 0.8   | 0.444 | 7.62E-22 | 32 | PRDX1    | Immune-B cells |
| 4.95E-36  | 0.37885799 | 1     | 0.809 | 1.67E-31 | 32 | RPL12    | Immune-B cells |
| 5.64E-27  | 0.37821075 | 0.971 | 0.676 | 1.90E-22 | 32 | H3F3A    | Immune-B cells |
| 1.65E-114 | 0.37639885 | 0.261 | 0.028 | #####    | 32 | C1orf162 | Immune-B cells |
| 9.43E-35  | 0.37593601 | 0.518 | 0.21  | 3.18E-30 | 32 | BRI3     | Immune-B cells |
| 1.07E-66  | 0.37518647 | 0.418 | 0.099 | 3.60E-62 | 32 | LACTB2   | Immune-B cells |
| 2.14E-57  | 0.37474423 | 0.486 | 0.141 | 7.22E-53 | 32 | MSRB2    | Immune-B cells |
| 8.42E-38  | 0.37466333 | 0.996 | 0.897 | 2.84E-33 | 32 | RPL39    | Immune-B cells |
| 8.36E-94  | 0.37368248 | 0.3   | 0.042 | 2.82E-89 | 32 | HCST     | Immune-B cells |
| 7.12E-62  | 0.37228184 | 0.536 | 0.151 | 2.40E-57 | 32 | DPYSL2   | Immune-B cells |
| 1.52E-30  | 0.37179456 | 0.836 | 0.432 | 5.11E-26 | 32 | IER2     | Immune-B cells |
| 2.79E-59  | 0.37142308 | 0.514 | 0.146 | 9.41E-55 | 32 | TFPI     | Immune-B cells |
| 9.21E-96  | 0.37091205 | 0.389 | 0.067 | 3.10E-91 | 32 | BIN1     | Immune-B cells |
| 5.54E-102 | 0.37055995 | 0.386 | 0.063 | 1.87E-97 | 32 | CORO1C   | Immune-B cells |
| 6.95E-118 | 0.37034795 | 0.364 | 0.05  | #####    | 32 | AR       | Immune-B cells |
| 1.37E-131 | 0.36936758 | 0.311 | 0.035 | #####    | 32 | ACMSD    | Immune-B cells |
| 1.26E-31  | 0.36936242 | 0.864 | 0.443 | 4.26E-27 | 32 | RPL36AL  | Immune-B cells |
| 9.43E-44  | 0.36909625 | 0.521 | 0.187 | 3.18E-39 | 32 | ALKBH7   | Immune-B cells |
| 4.70E-61  | 0.36904099 | 0.764 | 0.24  | 1.58E-56 | 32 | XIST     | Immune-B cells |
| 1.18E-123 | 0.36893102 | 0.264 | 0.027 | #####    | 32 | CD68     | Immune-B cells |
| 8.49E-32  | 0.3684314  | 0.989 | 0.808 | 2.86E-27 | 32 | ACTB     | Immune-B cells |
| 4.08E-40  | 0.36800124 | 0.561 | 0.207 | 1.37E-35 | 32 | KRT7     | Immune-B cells |
| 3.18E-36  | 0.36646097 | 0.346 | 0.107 | 1.07E-31 | 32 | REL      | Immune-B cells |
| 4.93E-35  | 0.36537177 | 0.479 | 0.174 | 1.66E-30 | 32 | RARRES3  | Immune-B cells |
| 1.39E-78  | 0.36516524 | 0.396 | 0.079 | 4.68E-74 | 32 | RASSF4   | Immune-B cells |
| 6.68E-56  | 0.36507648 | 0.5   | 0.147 | 2.25E-51 | 32 | PABPC4   | Immune-B cells |
| 4.86E-73  | 0.36477975 | 0.289 | 0.049 | 1.64E-68 | 32 | SMAP2    | Immune-B cells |
| 2.66E-68  | 0.36449842 | 0.464 | 0.114 | 8.96E-64 | 32 | SYCE1L   | Immune-B cells |
| 4.46E-48  | 0.36342983 | 0.6   | 0.214 | 1.50E-43 | 32 | EIF3F    | Immune-B cells |
| 1.28E-27  | 0.36319373 | 0.939 | 0.601 | 4.33E-23 | 32 | FXYD2    | Immune-B cells |
| 4.45E-27  | 0.36282826 | 0.982 | 0.696 | 1.50E-22 | 32 | RPL38    | Immune-B cells |
| 1.43E-47  | 0.36272322 | 0.611 | 0.212 | 4.83E-43 | 32 | ANXA1    | Immune-B cells |
| 7.92E-32  | 0.36253328 | 0.711 | 0.322 | 2.67E-27 | 32 | SOD2     | Immune-B cells |
| 9.16E-35  | 0.36170521 | 0.729 | 0.33  | 3.09E-30 | 32 | EIF3E    | Immune-B cells |
| 8.02E-36  | 0.35998873 | 0.996 | 0.849 | 2.70E-31 | 32 | RPL36    | Immune-B cells |
| 3.73E-26  | 0.35984624 | 0.968 | 0.725 | 1.26E-21 | 32 | RPL8     | Immune-B cells |
| 1.71E-27  | 0.35957352 | 1     | 0.897 | 5.75E-23 | 32 | RPL21    | Immune-B cells |
| 2.16E-41  | 0.35883254 | 0.668 | 0.269 | 7.28E-37 | 32 | GLTSCR2  | Immune-B cells |
| 1.30E-35  | 0.35869611 | 0.775 | 0.352 | 4.38E-31 | 32 | MCL1     | Immune-B cells |
| 3.42E-26  | 0.35709795 | 0.857 | 0.468 | 1.15E-21 | 32 | CFL1     | Immune-B cells |

|           |            |       |       |          |    |            |                |
|-----------|------------|-------|-------|----------|----|------------|----------------|
| 2.07E-55  | 0.35494899 | 0.55  | 0.173 | 6.96E-51 | 32 | TAPBP      | Immune-B cells |
| 7.47E-49  | 0.35491539 | 0.55  | 0.177 | 2.52E-44 | 32 | FKBP5      | Immune-B cells |
| 1.69E-72  | 0.35403102 | 0.311 | 0.056 | 5.69E-68 | 32 | RAB32      | Immune-B cells |
| 7.51E-24  | 0.35229082 | 0.739 | 0.409 | 2.53E-19 | 32 | CYB5A      | Immune-B cells |
| 6.01E-70  | 0.35172396 | 0.4   | 0.089 | 2.02E-65 | 32 | NIT2       | Immune-B cells |
| 3.70E-41  | 0.35037344 | 1     | 0.946 | 1.25E-36 | 32 | RPL41      | Immune-B cells |
| 1.17E-84  | 0.34837435 | 0.414 | 0.08  | 3.96E-80 | 32 | ZEB2       | Immune-B cells |
| 6.30E-37  | 0.34825529 | 0.825 | 0.387 | 2.12E-32 | 32 | PCBP1      | Immune-B cells |
| 1.98E-48  | 0.34823851 | 0.45  | 0.136 | 6.67E-44 | 32 | CTSZ       | Immune-B cells |
| 8.78E-26  | 0.34745397 | 0.982 | 0.757 | 2.96E-21 | 32 | RPL3       | Immune-B cells |
| 3.01E-38  | 0.34737183 | 0.279 | 0.072 | 1.02E-33 | 32 | PHACTR1    | Immune-B cells |
| 4.13E-39  | 0.34736569 | 0.596 | 0.236 | 1.39E-34 | 32 | TUBB       | Immune-B cells |
| 1.35E-37  | 0.34480696 | 0.721 | 0.31  | 4.54E-33 | 32 | YWHAH      | Immune-B cells |
| 2.50E-37  | 0.34452347 | 0.525 | 0.196 | 8.42E-33 | 32 | INSR       | Immune-B cells |
| 3.33E-41  | 0.34392612 | 0.564 | 0.21  | 1.12E-36 | 32 | GRN        | Immune-B cells |
| 1.34E-42  | 0.34389796 | 0.546 | 0.193 | 4.52E-38 | 32 | CPM        | Immune-B cells |
| 1.95E-56  | 0.34384118 | 0.55  | 0.168 | 6.55E-52 | 32 | SORBS2     | Immune-B cells |
| 6.54E-41  | 0.34310012 | 0.736 | 0.308 | 2.20E-36 | 32 | SH3BGR1    | Immune-B cells |
| 2.99E-31  | 0.34275816 | 0.993 | 0.846 | 1.01E-26 | 32 | RPS6       | Immune-B cells |
| 1.04E-51  | 0.34273616 | 0.546 | 0.175 | 3.50E-47 | 32 | FNIP2      | Immune-B cells |
| 1.06E-22  | 0.34250526 | 0.964 | 0.615 | 3.57E-18 | 32 | RPL24      | Immune-B cells |
| 1.08E-27  | 0.34110338 | 0.832 | 0.458 | 3.63E-23 | 32 | IFITM3     | Immune-B cells |
| 2.02E-59  | 0.33952141 | 0.382 | 0.091 | 6.81E-55 | 32 | FRMD4B     | Immune-B cells |
| 1.72E-23  | 0.33906673 | 0.261 | 0.086 | 5.80E-19 | 32 | ISG15      | Immune-B cells |
| 7.96E-51  | 0.33757907 | 0.536 | 0.169 | 2.68E-46 | 32 | SOX9       | Immune-B cells |
| 4.80E-67  | 0.33684491 | 0.414 | 0.097 | 1.62E-62 | 32 | MPST       | Immune-B cells |
| 5.26E-39  | 0.33610871 | 0.511 | 0.187 | 1.77E-34 | 32 | CSNK2B     | Immune-B cells |
| 1.25E-52  | 0.33580244 | 0.3   | 0.065 | 4.23E-48 | 32 | AREG       | Immune-B cells |
| 2.32E-62  | 0.33434655 | 0.286 | 0.053 | 7.80E-58 | 32 | C15orf48   | Immune-B cells |
| 1.66E-80  | 0.33374802 | 0.332 | 0.058 | 5.58E-76 | 32 | TNFRSF21   | Immune-B cells |
| 6.60E-64  | 0.33296443 | 0.293 | 0.055 | 2.22E-59 | 32 | CD83       | Immune-B cells |
| 3.12E-50  | 0.3326927  | 0.354 | 0.09  | 1.05E-45 | 32 | ERTAD4-AS1 | Immune-B cells |
| 1.04E-31  | 0.3324146  | 0.668 | 0.305 | 3.50E-27 | 32 | CLIC1      | Immune-B cells |
| 4.53E-39  | 0.33213219 | 0.461 | 0.158 | 1.53E-34 | 32 | CRYL1      | Immune-B cells |
| 2.21E-28  | 0.33187936 | 0.775 | 0.394 | 7.45E-24 | 32 | HMGN3      | Immune-B cells |
| 1.40E-135 | 0.33168481 | 0.257 | 0.023 | #####    | 32 | SLC47A2    | Immune-B cells |
| 3.83E-101 | 0.33159729 | 0.296 | 0.039 | 1.29E-96 | 32 | IL6R       | Immune-B cells |
| 3.68E-24  | 0.33131198 | 0.911 | 0.564 | 1.24E-19 | 32 | DUSP1      | Immune-B cells |
| 8.01E-109 | 0.33046875 | 0.289 | 0.036 | #####    | 32 | ZNF385B    | Immune-B cells |
| 2.89E-61  | 0.32980434 | 0.371 | 0.086 | 9.74E-57 | 32 | MET        | Immune-B cells |
| 1.72E-50  | 0.32916078 | 0.511 | 0.16  | 5.78E-46 | 32 | TGIF1      | Immune-B cells |
| 2.18E-103 | 0.32882147 | 0.343 | 0.05  | 7.34E-99 | 32 | DPP4       | Immune-B cells |
| 8.29E-22  | 0.32855172 | 0.975 | 0.647 | 2.79E-17 | 32 | RPL22      | Immune-B cells |
| 2.74E-21  | 0.32761803 | 0.907 | 0.556 | 9.22E-17 | 32 | GAPDH      | Immune-B cells |
| 5.77E-38  | 0.32758724 | 0.639 | 0.26  | 1.94E-33 | 32 | SEC11A     | Immune-B cells |
| 2.17E-46  | 0.32728747 | 0.446 | 0.138 | 7.32E-42 | 32 | CUX1       | Immune-B cells |
| 2.18E-25  | 0.3260624  | 0.746 | 0.394 | 7.33E-21 | 32 | SOX4       | Immune-B cells |
| 2.97E-27  | 0.32596413 | 0.986 | 0.805 | 1.00E-22 | 32 | ITM2B      | Immune-B cells |

|          |            |       |       |          |    |          |                |
|----------|------------|-------|-------|----------|----|----------|----------------|
| 2.13E-33 | 0.32584868 | 0.786 | 0.369 | 7.18E-29 | 32 | TPM1     | Immune-B cells |
| 4.91E-59 | 0.32550791 | 0.411 | 0.103 | 1.66E-54 | 32 | HSD17B11 | Immune-B cells |
| 2.22E-24 | 0.3245284  | 0.704 | 0.365 | 7.49E-20 | 32 | SPINT2   | Immune-B cells |
| 8.50E-35 | 0.3244456  | 0.686 | 0.298 | 2.87E-30 | 32 | BRK1     | Immune-B cells |
| 1.51E-21 | 0.32409251 | 0.839 | 0.481 | 5.07E-17 | 32 | PSAP     | Immune-B cells |
| 7.55E-59 | 0.32380128 | 0.493 | 0.139 | 2.54E-54 | 32 | CRTAP    | Immune-B cells |
| 6.98E-21 | 0.32340321 | 0.721 | 0.389 | 2.35E-16 | 32 | MGST3    | Immune-B cells |
| 1.49E-32 | 0.32268157 | 0.782 | 0.375 | 5.02E-28 | 32 | ATOX1    | Immune-B cells |
| 4.87E-70 | 0.32258701 | 0.346 | 0.068 | 1.64E-65 | 32 | TNFAIP2  | Immune-B cells |
| 5.95E-45 | 0.32250168 | 0.611 | 0.223 | 2.01E-40 | 32 | ACAT1    | Immune-B cells |
| 1.10E-31 | 0.32245587 | 0.718 | 0.324 | 3.72E-27 | 32 | ARPC2    | Immune-B cells |
| 5.10E-51 | 0.3223682  | 0.55  | 0.171 | 1.72E-46 | 32 | IFI27    | Immune-B cells |
| 2.85E-26 | 0.32082573 | 0.714 | 0.355 | 9.60E-22 | 32 | CSTB     | Immune-B cells |
| 1.83E-65 | 0.32069665 | 0.361 | 0.077 | 6.17E-61 | 32 | MAOB     | Immune-B cells |
| 7.81E-55 | 0.32016772 | 0.432 | 0.115 | 2.63E-50 | 32 | PALLD    | Immune-B cells |
| 1.16E-78 | 0.31802898 | 0.286 | 0.045 | 3.90E-74 | 32 | PAPLN    | Immune-B cells |
| 3.45E-41 | 0.31764252 | 0.35  | 0.099 | 1.16E-36 | 32 | MAFB     | Immune-B cells |
| 6.06E-74 | 0.31763073 | 0.257 | 0.039 | 2.04E-69 | 32 | ANKRD65  | Immune-B cells |
| 2.33E-81 | 0.3164569  | 0.325 | 0.055 | 7.86E-77 | 32 | GALM     | Immune-B cells |
| 1.31E-31 | 0.31508236 | 0.754 | 0.355 | 4.43E-27 | 32 | SNX3     | Immune-B cells |
| 6.67E-56 | 0.31460202 | 0.3   | 0.064 | 2.25E-51 | 32 | HS3ST1   | Immune-B cells |
| 4.20E-26 | 0.31395586 | 0.782 | 0.414 | 1.42E-21 | 32 | TMEM258  | Immune-B cells |
| 1.98E-40 | 0.3138896  | 0.593 | 0.228 | 6.67E-36 | 32 | CAP1     | Immune-B cells |
| 1.35E-27 | 0.31324674 | 0.843 | 0.439 | 4.56E-23 | 32 | MYL12A   | Immune-B cells |
| 3.17E-55 | 0.31282464 | 0.311 | 0.067 | 1.07E-50 | 32 | NR4A2    | Immune-B cells |
| 8.86E-30 | 0.31265808 | 0.293 | 0.092 | 2.98E-25 | 32 | LIPA     | Immune-B cells |
| 5.67E-23 | 0.31211606 | 0.729 | 0.378 | 1.91E-18 | 32 | GADD45B  | Immune-B cells |
| 1.23E-24 | 0.3116345  | 0.875 | 0.494 | 4.14E-20 | 32 | PABPC1   | Immune-B cells |
| 2.13E-74 | 0.30917059 | 0.368 | 0.071 | 7.17E-70 | 32 | IL18     | Immune-B cells |
| 3.90E-20 | 0.30898314 | 0.957 | 0.672 | 1.31E-15 | 32 | EIF1     | Immune-B cells |
| 1.16E-30 | 0.30844066 | 0.746 | 0.363 | 3.91E-26 | 32 | PHPT1    | Immune-B cells |
| 1.19E-27 | 0.30765784 | 0.768 | 0.392 | 4.02E-23 | 32 | RPS10    | Immune-B cells |
| 4.39E-44 | 0.30720104 | 0.482 | 0.158 | 1.48E-39 | 32 | NEDD9    | Immune-B cells |
| 5.13E-42 | 0.30693303 | 0.282 | 0.068 | 1.73E-37 | 32 | THY1     | Immune-B cells |
| 7.78E-37 | 0.3064622  | 0.529 | 0.2   | 2.62E-32 | 32 | CNDP2    | Immune-B cells |
| 5.21E-62 | 0.30525088 | 0.371 | 0.084 | 1.76E-57 | 32 | TMEM98   | Immune-B cells |
| 2.03E-24 | 0.30508245 | 0.821 | 0.444 | 6.85E-20 | 32 | EDF1     | Immune-B cells |
| 3.12E-62 | 0.30490758 | 0.354 | 0.077 | 1.05E-57 | 32 | PMM1     | Immune-B cells |
| 2.72E-60 | 0.30467841 | 0.411 | 0.1   | 9.15E-56 | 32 | NREP     | Immune-B cells |
| 6.91E-53 | 0.30431772 | 0.396 | 0.103 | 2.33E-48 | 32 | PDLIM1   | Immune-B cells |
| 9.44E-22 | 0.30358528 | 0.836 | 0.464 | 3.18E-17 | 32 | MYL12B   | Immune-B cells |
| 3.71E-22 | 0.30346662 | 0.893 | 0.537 | 1.25E-17 | 32 | RPS27L   | Immune-B cells |
| 6.13E-29 | 0.30312524 | 0.996 | 0.852 | 2.07E-24 | 32 | RPL37A   | Immune-B cells |
| 2.87E-23 | 0.3021377  | 0.979 | 0.7   | 9.66E-19 | 32 | RPS26    | Immune-B cells |
| 2.58E-41 | 0.30180639 | 0.439 | 0.142 | 8.69E-37 | 32 | NCOA4    | Immune-B cells |
| 8.91E-54 | 0.30169424 | 0.371 | 0.093 | 3.00E-49 | 32 | RNF130   | Immune-B cells |
| 4.81E-37 | 0.30169037 | 0.639 | 0.26  | 1.62E-32 | 32 | TSPO     | Immune-B cells |
| 6.91E-54 | 0.30159337 | 0.432 | 0.118 | 2.33E-49 | 32 | UBE2E2   | Immune-B cells |

|           |            |       |       |          |    |          |                |
|-----------|------------|-------|-------|----------|----|----------|----------------|
| 1.96E-40  | 0.30104369 | 0.504 | 0.177 | 6.60E-36 | 32 | GDI2     | Immune-B cells |
| 2.18E-34  | 0.30085274 | 0.596 | 0.248 | 7.36E-30 | 32 | TIMM8B   | Immune-B cells |
| 1.18E-68  | 0.3001415  | 0.439 | 0.101 | 3.99E-64 | 32 | MAF      | Immune-B cells |
| 4.67E-28  | 0.29975139 | 0.757 | 0.371 | 1.57E-23 | 32 | EIF3K    | Immune-B cells |
| 8.79E-63  | 0.29864261 | 0.329 | 0.068 | 2.96E-58 | 32 | RAB31    | Immune-B cells |
| 2.83E-77  | 0.29836329 | 0.318 | 0.055 | 9.53E-73 | 32 | BAMBI    | Immune-B cells |
| 4.53E-37  | 0.29800664 | 0.564 | 0.22  | 1.53E-32 | 32 | TMEM219  | Immune-B cells |
| 4.92E-45  | 0.29693584 | 0.325 | 0.084 | 1.66E-40 | 32 | IL13RA1  | Immune-B cells |
| 7.30E-87  | 0.29501909 | 0.343 | 0.058 | 2.46E-82 | 32 | SHMT1    | Immune-B cells |
| 6.82E-19  | 0.29499388 | 0.982 | 0.728 | 2.30E-14 | 32 | SERF2    | Immune-B cells |
| 3.55E-18  | 0.29421935 | 0.825 | 0.502 | 1.19E-13 | 32 | PEBP1    | Immune-B cells |
| 1.77E-29  | 0.29405924 | 0.404 | 0.149 | 5.96E-25 | 32 | IFI6     | Immune-B cells |
| 7.56E-60  | 0.29351354 | 0.286 | 0.055 | 2.55E-55 | 32 | OGFRL1   | Immune-B cells |
| 8.65E-54  | 0.29246011 | 0.346 | 0.083 | 2.92E-49 | 32 | HRSP12   | Immune-B cells |
| 5.90E-32  | 0.2924008  | 0.729 | 0.338 | 1.99E-27 | 32 | MRPS21   | Immune-B cells |
| 8.30E-34  | 0.29224959 | 0.589 | 0.243 | 2.80E-29 | 32 | ANXA4    | Immune-B cells |
| 1.65E-61  | 0.29191761 | 0.311 | 0.063 | 5.56E-57 | 32 | PYCARD   | Immune-B cells |
| 5.17E-20  | 0.29149973 | 0.8   | 0.448 | 1.74E-15 | 32 | SLC25A6  | Immune-B cells |
| 3.44E-45  | 0.291184   | 0.443 | 0.136 | 1.16E-40 | 32 | SLC25A37 | Immune-B cells |
| 9.54E-41  | 0.2911484  | 0.439 | 0.143 | 3.21E-36 | 32 | PLEKHA5  | Immune-B cells |
| 6.47E-47  | 0.29064355 | 0.486 | 0.153 | 2.18E-42 | 32 | 11-553L6 | Immune-B cells |
| 1.28E-52  | 0.28966527 | 0.436 | 0.12  | 4.32E-48 | 32 | MAP3K1   | Immune-B cells |
| 6.89E-77  | 0.28913572 | 0.254 | 0.037 | 2.32E-72 | 32 | TNC      | Immune-B cells |
| 2.50E-61  | 0.28890821 | 0.436 | 0.107 | 8.41E-57 | 32 | ARHGDIB  | Immune-B cells |
| 8.31E-24  | 0.28875277 | 0.746 | 0.39  | 2.80E-19 | 32 | NEDD8    | Immune-B cells |
| 1.06E-43  | 0.28867053 | 0.471 | 0.153 | 3.56E-39 | 32 | SUPT4H1  | Immune-B cells |
| 6.53E-42  | 0.28756381 | 0.4   | 0.122 | 2.20E-37 | 32 | TCEA3    | Immune-B cells |
| 2.13E-37  | 0.28652503 | 0.489 | 0.175 | 7.18E-33 | 32 | ANK3     | Immune-B cells |
| 2.38E-102 | 0.28544716 | 0.311 | 0.042 | 8.01E-98 | 32 | ADGRG6   | Immune-B cells |
| 2.15E-48  | 0.28495276 | 0.414 | 0.116 | 7.24E-44 | 32 | SLC40A1  | Immune-B cells |
| 7.38E-31  | 0.28476608 | 0.539 | 0.226 | 2.49E-26 | 32 | ZBTB20   | Immune-B cells |
| 1.28E-111 | 0.28460151 | 0.264 | 0.029 | #####    | 32 | USH1C    | Immune-B cells |
| 1.33E-18  | 0.28417188 | 0.864 | 0.553 | 4.47E-14 | 32 | TOMM7    | Immune-B cells |
| 2.91E-28  | 0.28397913 | 0.714 | 0.343 | 9.79E-24 | 32 | PSME1    | Immune-B cells |
| 1.52E-35  | 0.28343916 | 0.529 | 0.204 | 5.11E-31 | 32 | FCGRT    | Immune-B cells |
| 7.25E-36  | 0.2827669  | 0.636 | 0.263 | 2.44E-31 | 32 | BLOC1S1  | Immune-B cells |
| 2.67E-41  | 0.28252095 | 0.282 | 0.068 | 9.00E-37 | 32 | GMFG     | Immune-B cells |
| 5.61E-60  | 0.2815169  | 0.411 | 0.101 | 1.89E-55 | 32 | TNFRSF1A | Immune-B cells |
| 7.48E-70  | 0.28020849 | 0.289 | 0.05  | 2.52E-65 | 32 | HGD      | Immune-B cells |
| 1.72E-50  | 0.27957644 | 0.425 | 0.118 | 5.81E-46 | 32 | SLC16A4  | Immune-B cells |
| 2.39E-43  | 0.27837132 | 0.343 | 0.093 | 8.04E-39 | 32 | RNASET2  | Immune-B cells |
| 2.30E-55  | 0.27703266 | 0.389 | 0.098 | 7.76E-51 | 32 | KIF22    | Immune-B cells |
| 1.14E-36  | 0.27688354 | 0.507 | 0.187 | 3.85E-32 | 32 | PICALM   | Immune-B cells |
| 2.38E-49  | 0.27432736 | 0.425 | 0.121 | 8.02E-45 | 32 | BNIP3L   | Immune-B cells |
| 9.91E-25  | 0.27399234 | 0.65  | 0.321 | 3.34E-20 | 32 | TRMT112  | Immune-B cells |
| 5.97E-32  | 0.27363441 | 0.693 | 0.304 | 2.01E-27 | 32 | HERPUD1  | Immune-B cells |
| 2.25E-18  | 0.27287531 | 0.943 | 0.617 | 7.59E-14 | 32 | COX4I1   | Immune-B cells |
| 2.32E-32  | 0.27180212 | 0.307 | 0.093 | 7.82E-28 | 32 | PBLD     | Immune-B cells |

|          |            |       |       |          |    |          |                |
|----------|------------|-------|-------|----------|----|----------|----------------|
| 7.88E-37 | 0.27170059 | 0.339 | 0.101 | 2.66E-32 | 32 | UBR4     | Immune-B cells |
| 1.64E-35 | 0.27150821 | 0.529 | 0.205 | 5.52E-31 | 32 | ERGIC3   | Immune-B cells |
| 1.80E-56 | 0.27131993 | 0.329 | 0.073 | 6.06E-52 | 32 | NOTCH2   | Immune-B cells |
| 2.38E-54 | 0.27054814 | 0.336 | 0.078 | 8.03E-50 | 32 | TM7SF3   | Immune-B cells |
| 6.32E-30 | 0.26995179 | 0.704 | 0.324 | 2.13E-25 | 32 | NDUFB10  | Immune-B cells |
| 5.28E-21 | 0.26988911 | 0.796 | 0.429 | 1.78E-16 | 32 | TPI1     | Immune-B cells |
| 8.59E-71 | 0.26983872 | 0.314 | 0.057 | 2.89E-66 | 32 | HSPB8    | Immune-B cells |
| 8.53E-76 | 0.26963151 | 0.289 | 0.047 | 2.87E-71 | 32 | FZD1     | Immune-B cells |
| 3.54E-41 | 0.26889328 | 0.421 | 0.132 | 1.19E-36 | 32 | SIGIRR   | Immune-B cells |
| 3.83E-38 | 0.26838523 | 0.5   | 0.178 | 1.29E-33 | 32 | WASF2    | Immune-B cells |
| 6.39E-55 | 0.26720417 | 0.293 | 0.061 | 2.15E-50 | 32 | PDE7A    | Immune-B cells |
| 4.02E-55 | 0.26657427 | 0.346 | 0.081 | 1.35E-50 | 32 | CMBL     | Immune-B cells |
| 1.19E-41 | 0.26648423 | 0.421 | 0.132 | 4.02E-37 | 32 | CBX6     | Immune-B cells |
| 6.17E-22 | 0.26621936 | 0.879 | 0.512 | 2.08E-17 | 32 | PCBP2    | Immune-B cells |
| 1.98E-18 | 0.26598955 | 0.825 | 0.469 | 6.66E-14 | 32 | OST4     | Immune-B cells |
| 1.10E-35 | 0.2659884  | 0.479 | 0.176 | 3.70E-31 | 32 | SYNGR2   | Immune-B cells |
| 6.11E-34 | 0.26580897 | 0.496 | 0.189 | 2.06E-29 | 32 | EIF3G    | Immune-B cells |
| 5.04E-42 | 0.26572598 | 0.354 | 0.101 | 1.70E-37 | 32 | ISOC2    | Immune-B cells |
| 1.80E-44 | 0.26560767 | 0.314 | 0.079 | 6.05E-40 | 32 | NBL1     | Immune-B cells |
| 3.27E-26 | 0.26516046 | 0.7   | 0.34  | 1.10E-21 | 32 | CUTA     | Immune-B cells |
| 9.74E-50 | 0.26491121 | 0.304 | 0.07  | 3.28E-45 | 32 | SNX7     | Immune-B cells |
| 1.25E-18 | 0.26475389 | 0.761 | 0.439 | 4.21E-14 | 32 | LAMTOR5  | Immune-B cells |
| 1.32E-18 | 0.26467905 | 0.854 | 0.496 | 4.46E-14 | 32 | HNRNPA1  | Immune-B cells |
| 2.60E-24 | 0.26403001 | 0.893 | 0.498 | 8.76E-20 | 32 | RPL36A   | Immune-B cells |
| 3.13E-57 | 0.26391307 | 0.339 | 0.076 | 1.06E-52 | 32 | EDN1     | Immune-B cells |
| 3.20E-38 | 0.2631508  | 0.421 | 0.139 | 1.08E-33 | 32 | GRHPR    | Immune-B cells |
| 3.26E-18 | 0.26041283 | 0.982 | 0.731 | 1.10E-13 | 32 | RPL6     | Immune-B cells |
| 3.38E-31 | 0.26024316 | 0.557 | 0.229 | 1.14E-26 | 32 | EIF3H    | Immune-B cells |
| 8.73E-71 | 0.25993291 | 0.254 | 0.039 | 2.94E-66 | 32 | OLR1     | Immune-B cells |
| 4.95E-38 | 0.25919086 | 0.521 | 0.19  | 1.67E-33 | 32 | H2AFY    | Immune-B cells |
| 1.50E-47 | 0.25871478 | 0.371 | 0.1   | 5.06E-43 | 32 | TSPAN4   | Immune-B cells |
| 4.03E-58 | 0.25855053 | 0.529 | 0.15  | 1.36E-53 | 32 | KCTD12   | Immune-B cells |
| 4.95E-23 | 0.25850725 | 0.743 | 0.385 | 1.67E-18 | 32 | RBX1     | Immune-B cells |
| 3.06E-59 | 0.25775831 | 0.282 | 0.053 | 1.03E-54 | 32 | PTPRC    | Immune-B cells |
| 8.53E-37 | 0.25768028 | 0.475 | 0.168 | 2.87E-32 | 32 | ZBTB44   | Immune-B cells |
| 2.37E-45 | 0.25755908 | 0.307 | 0.075 | 7.99E-41 | 32 | BCL2     | Immune-B cells |
| 2.96E-31 | 0.25745767 | 0.464 | 0.178 | 9.99E-27 | 32 | CTSL     | Immune-B cells |
| 7.26E-19 | 0.257444   | 0.861 | 0.505 | 2.45E-14 | 32 | ATPIF1   | Immune-B cells |
| 1.42E-53 | 0.25716454 | 0.304 | 0.067 | 4.80E-49 | 32 | TMEM54   | Immune-B cells |
| 3.91E-62 | 0.25700168 | 0.254 | 0.044 | 1.32E-57 | 32 | ARSE     | Immune-B cells |
| 8.11E-75 | 0.25691788 | 0.382 | 0.075 | 2.73E-70 | 32 | SLC22A2  | Immune-B cells |
| 3.02E-70 | 0.25657788 | 0.275 | 0.046 | 1.02E-65 | 32 | TINAG    | Immune-B cells |
| 1.29E-48 | 0.25566447 | 0.336 | 0.082 | 4.34E-44 | 32 | FABP3    | Immune-B cells |
| 8.68E-34 | 0.25534594 | 0.561 | 0.219 | 2.92E-29 | 32 | USP53    | Immune-B cells |
| 3.48E-45 | 0.25524641 | 0.275 | 0.062 | 1.17E-40 | 32 | LPAR6    | Immune-B cells |
| 1.56E-27 | 0.25511349 | 0.507 | 0.214 | 5.26E-23 | 32 | RNF181   | Immune-B cells |
| 1.54E-40 | 0.25489233 | 0.357 | 0.103 | 5.20E-36 | 32 | ATP6V1B2 | Immune-B cells |
| 6.91E-41 | 0.25472935 | 0.275 | 0.067 | 2.33E-36 | 32 | PRMT9    | Immune-B cells |

|           |            |       |       |          |    |          |                 |
|-----------|------------|-------|-------|----------|----|----------|-----------------|
| 2.08E-39  | 0.25421015 | 0.404 | 0.124 | 7.00E-35 | 32 | MEF2C    | Immune-B cells  |
| 1.43E-43  | 0.25414204 | 0.321 | 0.083 | 4.81E-39 | 32 | PEPD     | Immune-B cells  |
| 4.27E-72  | 0.25411431 | 0.279 | 0.046 | 1.44E-67 | 32 | CLDN1    | Immune-B cells  |
| 7.57E-31  | 0.2540974  | 0.5   | 0.198 | 2.55E-26 | 32 | OSTC     | Immune-B cells  |
| 8.28E-40  | 0.25344288 | 0.496 | 0.169 | 2.79E-35 | 32 | TUBA1A   | Immune-B cells  |
| 5.97E-33  | 0.25308192 | 0.668 | 0.288 | 2.01E-28 | 32 | ADI1     | Immune-B cells  |
| 3.85E-49  | 0.25245628 | 0.389 | 0.104 | 1.30E-44 | 32 | PSMB9    | Immune-B cells  |
| 2.35E-30  | 0.25223983 | 0.471 | 0.181 | 7.93E-26 | 32 | CLDN3    | Immune-B cells  |
| 2.93E-30  | 0.2517393  | 0.539 | 0.222 | 9.86E-26 | 32 | CFLAR    | Immune-B cells  |
| 3.88E-35  | 0.25132439 | 0.518 | 0.197 | 1.31E-30 | 32 | POLR2J   | Immune-B cells  |
| 2.28E-88  | 0.25112518 | 0.261 | 0.035 | 7.68E-84 | 32 | TNIK     | Immune-B cells  |
| 1.96E-36  | 0.25087166 | 0.386 | 0.124 | 6.60E-32 | 32 | PSMB8    | Immune-B cells  |
| 7.37E-18  | 0.25046638 | 0.829 | 0.478 | 2.48E-13 | 32 | SOD1     | Immune-B cells  |
| 7.57E-31  | 0.25045807 | 0.529 | 0.217 | 2.55E-26 | 32 | ECH1     | Immune-B cells  |
| 1.04E-35  | 0.25030746 | 0.525 | 0.197 | 3.51E-31 | 32 | EIF3L    | Immune-B cells  |
| 3.51E-45  | 0.25023496 | 0.311 | 0.077 | 1.18E-40 | 32 | ERBB3    | Immune-B cells  |
| 0         | 2.29840441 | 0.962 | 0.101 | 0        | 33 | SPINK1   | Immune-NK cells |
| 0         | 1.70408579 | 0.623 | 0.026 | 0        | 33 | OLFM4    | Immune-NK cells |
| 3.04E-96  | 1.6804323  | 0.995 | 0.588 | 1.02E-91 | 33 | SPP1     | Immune-NK cells |
| 9.49E-145 | 1.23665471 | 0.798 | 0.135 | #####    | 33 | SLC8A1   | Immune-NK cells |
| 6.85E-126 | 1.20477905 | 0.35  | 0.032 | #####    | 33 | KLK1     | Immune-NK cells |
| 5.46E-203 | 1.19701861 | 0.694 | 0.076 | #####    | 33 | RHCG     | Immune-NK cells |
| 3.22E-185 | 1.11353662 | 0.716 | 0.087 | #####    | 33 | SLC26A7  | Immune-NK cells |
| 1.51E-57  | 1.10861709 | 0.934 | 0.54  | 5.09E-53 | 33 | WFDC2    | Immune-NK cells |
| 8.82E-211 | 1.08296695 | 0.738 | 0.083 | #####    | 33 | ATP6V0D2 | Immune-NK cells |
| 7.11E-61  | 1.01366458 | 0.798 | 0.318 | 2.40E-56 | 33 | C12orf75 | Immune-NK cells |
| 7.40E-141 | 0.98783633 | 0.519 | 0.061 | #####    | 33 | LTF      | Immune-NK cells |
| 2.95E-64  | 0.98090422 | 0.749 | 0.25  | 9.93E-60 | 33 | LITAF    | Immune-NK cells |
| 1.90E-178 | 0.98015294 | 0.568 | 0.058 | #####    | 33 | SLC4A1   | Immune-NK cells |
| 9.13E-35  | 0.9547951  | 0.689 | 0.292 | 3.08E-30 | 33 | MMP7     | Immune-NK cells |
| 5.34E-76  | 0.91213976 | 0.661 | 0.148 | 1.80E-71 | 33 | CALB1    | Immune-NK cells |
| 1.33E-93  | 0.88960885 | 0.765 | 0.174 | 4.48E-89 | 33 | PTGER3   | Immune-NK cells |
| 1.25E-43  | 0.8607562  | 0.699 | 0.267 | 4.21E-39 | 33 | TSPAN1   | Immune-NK cells |
| 5.81E-56  | 0.8304239  | 0.787 | 0.293 | 1.96E-51 | 33 | ATP6AP2  | Immune-NK cells |
| 3.55E-102 | 0.82996497 | 0.634 | 0.116 | 1.20E-97 | 33 | TMEM101  | Immune-NK cells |
| 1.74E-40  | 0.80561208 | 0.787 | 0.392 | 5.87E-36 | 33 | ATP6V0B  | Immune-NK cells |
| 3.21E-69  | 0.78918834 | 0.683 | 0.175 | 1.08E-64 | 33 | TMEM213  | Immune-NK cells |
| 8.41E-44  | 0.78428278 | 0.891 | 0.48  | 2.83E-39 | 33 | CTSD     | Immune-NK cells |
| 1.25E-58  | 0.77224839 | 0.623 | 0.174 | 4.21E-54 | 33 | RARRES3  | Immune-NK cells |
| 2.97E-41  | 0.7598854  | 0.995 | 0.606 | 1.00E-36 | 33 | DEFB1    | Immune-NK cells |
| 1.51E-37  | 0.74231025 | 0.754 | 0.355 | 5.10E-33 | 33 | LDHA     | Immune-NK cells |
| 9.94E-128 | 0.73922087 | 0.486 | 0.059 | #####    | 33 | ERP27    | Immune-NK cells |
| 3.22E-148 | 0.73878276 | 0.579 | 0.071 | #####    | 33 | IL18     | Immune-NK cells |
| 3.69E-45  | 0.73728527 | 0.645 | 0.223 | 1.24E-40 | 33 | SERPING1 | Immune-NK cells |
| 2.98E-44  | 0.726488   | 0.77  | 0.296 | 1.00E-39 | 33 | HIF1A    | Immune-NK cells |
| 8.09E-34  | 0.71339889 | 0.732 | 0.323 | 2.73E-29 | 33 | SOD2     | Immune-NK cells |
| 1.44E-82  | 0.71094446 | 0.448 | 0.072 | 4.84E-78 | 33 | UAP1     | Immune-NK cells |
| 2.76E-36  | 0.69714287 | 0.749 | 0.337 | 9.30E-32 | 33 | SLC25A5  | Immune-NK cells |

|           |            |       |       |          |    |          |                 |
|-----------|------------|-------|-------|----------|----|----------|-----------------|
| 1.26E-39  | 0.68852966 | 0.437 | 0.118 | 4.24E-35 | 33 | CCL2     | Immune-NK cells |
| 1.29E-57  | 0.67991389 | 0.492 | 0.111 | 4.34E-53 | 33 | ADM      | Immune-NK cells |
| 9.60E-41  | 0.67483893 | 0.656 | 0.235 | 3.24E-36 | 33 | LGALS3   | Immune-NK cells |
| 1.77E-66  | 0.66843731 | 0.65  | 0.152 | 5.96E-62 | 33 | ADGRF5   | Immune-NK cells |
| 3.54E-216 | 0.66577731 | 0.519 | 0.041 | #####    | 33 | DMRT2    | Immune-NK cells |
| 8.61E-36  | 0.66361254 | 0.781 | 0.367 | 2.90E-31 | 33 | CHCHD10  | Immune-NK cells |
| 6.93E-49  | 0.65955089 | 0.727 | 0.24  | 2.33E-44 | 33 | RASD1    | Immune-NK cells |
| 1.68E-32  | 0.65131063 | 0.858 | 0.483 | 5.66E-28 | 33 | LDHB     | Immune-NK cells |
| 1.36E-56  | 0.63152841 | 0.612 | 0.166 | 4.59E-52 | 33 | DCDC2    | Immune-NK cells |
| 5.52E-58  | 0.62032823 | 0.481 | 0.107 | 1.86E-53 | 33 | GADD45G  | Immune-NK cells |
| 1.31E-43  | 0.61518635 | 0.727 | 0.25  | 4.42E-39 | 33 | COX7A1   | Immune-NK cells |
| 8.13E-80  | 0.61138434 | 0.448 | 0.072 | 2.74E-75 | 33 | MEM178   | Immune-NK cells |
| 3.22E-32  | 0.6090335  | 0.683 | 0.3   | 1.08E-27 | 33 | NDUFA6   | Immune-NK cells |
| 2.14E-175 | 0.60489222 | 0.437 | 0.035 | #####    | 33 | AVPR1A   | Immune-NK cells |
| 6.52E-35  | 0.59566005 | 0.705 | 0.285 | 2.20E-30 | 33 | CKB      | Immune-NK cells |
| 9.73E-48  | 0.59369819 | 0.552 | 0.151 | 3.28E-43 | 33 | KCTD12   | Immune-NK cells |
| 2.95E-39  | 0.59227853 | 0.678 | 0.247 | 9.95E-35 | 33 | UQCRCF1  | Immune-NK cells |
| 8.56E-178 | 0.58079707 | 0.383 | 0.027 | #####    | 33 | FOXI1    | Immune-NK cells |
| 5.32E-33  | 0.57432164 | 0.956 | 0.648 | 1.79E-28 | 33 | CD24     | Immune-NK cells |
| 2.25E-38  | 0.57132642 | 0.678 | 0.24  | 7.57E-34 | 33 | ATP6V1A  | Immune-NK cells |
| 4.12E-29  | 0.56440904 | 0.76  | 0.367 | 1.39E-24 | 33 | CYCS     | Immune-NK cells |
| 5.57E-27  | 0.56072787 | 0.847 | 0.511 | 1.88E-22 | 33 | RTN4     | Immune-NK cells |
| 3.88E-24  | 0.55920078 | 0.798 | 0.449 | 1.31E-19 | 33 | ATP5G3   | Immune-NK cells |
| 7.48E-28  | 0.55678624 | 0.765 | 0.374 | 2.52E-23 | 33 | PKM      | Immune-NK cells |
| 1.85E-26  | 0.55662539 | 0.721 | 0.345 | 6.24E-22 | 33 | EPCAM    | Immune-NK cells |
| 1.24E-41  | 0.55461492 | 0.459 | 0.118 | 4.19E-37 | 33 | SLC16A7  | Immune-NK cells |
| 5.59E-42  | 0.55398937 | 0.727 | 0.252 | 1.88E-37 | 33 | SCIN     | Immune-NK cells |
| 1.87E-31  | 0.54794156 | 0.76  | 0.355 | 6.29E-27 | 33 | ATP5B    | Immune-NK cells |
| 1.19E-46  | 0.54522147 | 0.601 | 0.174 | 4.02E-42 | 33 | ITGB6    | Immune-NK cells |
| 2.04E-22  | 0.54511355 | 0.678 | 0.336 | 6.87E-18 | 33 | KRT18    | Immune-NK cells |
| 2.94E-21  | 0.54322101 | 0.831 | 0.574 | 9.89E-17 | 33 | GSTP1    | Immune-NK cells |
| 4.49E-99  | 0.54243538 | 0.317 | 0.033 | 1.51E-94 | 33 | LCN2     | Immune-NK cells |
| 4.13E-44  | 0.54230981 | 0.492 | 0.13  | 1.39E-39 | 33 | RRAD     | Immune-NK cells |
| 2.55E-29  | 0.53712971 | 0.896 | 0.497 | 8.59E-25 | 33 | ATP1A1   | Immune-NK cells |
| 6.37E-187 | 0.52121388 | 0.372 | 0.024 | #####    | 33 | AQP6     | Immune-NK cells |
| 1.12E-29  | 0.5211035  | 0.705 | 0.305 | 3.76E-25 | 33 | BCAM     | Immune-NK cells |
| 5.14E-21  | 0.51655018 | 0.76  | 0.449 | 1.73E-16 | 33 | SLC25A6  | Immune-NK cells |
| 7.04E-25  | 0.51512894 | 0.94  | 0.607 | 2.37E-20 | 33 | COX7B    | Immune-NK cells |
| 1.47E-37  | 0.51350469 | 0.82  | 0.315 | 4.96E-33 | 33 | CA12     | Immune-NK cells |
| 4.92E-43  | 0.51253433 | 0.557 | 0.163 | 1.66E-38 | 33 | IDH2     | Immune-NK cells |
| 1.81E-32  | 0.51216069 | 0.628 | 0.237 | 6.09E-28 | 33 | HIGD1A   | Immune-NK cells |
| 8.37E-58  | 0.51206005 | 0.563 | 0.134 | 2.82E-53 | 33 | MAGI1    | Immune-NK cells |
| 5.46E-27  | 0.50912262 | 0.749 | 0.373 | 1.84E-22 | 33 | ATP5O    | Immune-NK cells |
| 1.18E-24  | 0.50848339 | 0.913 | 0.608 | 3.97E-20 | 33 | HSPA1A   | Immune-NK cells |
| 4.45E-81  | 0.50415326 | 0.459 | 0.075 | 1.50E-76 | 33 | ATP6V0A4 | Immune-NK cells |
| 2.07E-44  | 0.50375013 | 0.541 | 0.15  | 6.97E-40 | 33 | ADAMTS1  | Immune-NK cells |
| 7.98E-25  | 0.50111229 | 0.694 | 0.325 | 2.69E-20 | 33 | ATP5A1   | Immune-NK cells |
| 1.16E-111 | 0.49973201 | 0.377 | 0.04  | #####    | 33 | KIT      | Immune-NK cells |

|           |            |       |       |          |    |          |                 |
|-----------|------------|-------|-------|----------|----|----------|-----------------|
| 2.37E-96  | 0.49584409 | 0.372 | 0.044 | 7.97E-92 | 33 | CLNK     | Immune-NK cells |
| 9.16E-61  | 0.49011009 | 0.475 | 0.098 | 3.09E-56 | 33 | KITLG    | Immune-NK cells |
| 1.49E-42  | 0.48968087 | 0.557 | 0.165 | 5.01E-38 | 33 | AK2      | Immune-NK cells |
| 3.68E-50  | 0.4867004  | 0.546 | 0.14  | 1.24E-45 | 33 | OGDHL    | Immune-NK cells |
| 1.86E-24  | 0.4865439  | 0.716 | 0.35  | 6.27E-20 | 33 | PRR13    | Immune-NK cells |
| 4.61E-103 | 0.4841576  | 0.399 | 0.047 | 1.55E-98 | 33 | INC01187 | Immune-NK cells |
| 2.20E-32  | 0.48333481 | 0.743 | 0.301 | 7.40E-28 | 33 | MSI2     | Immune-NK cells |
| 2.04E-65  | 0.47900793 | 0.885 | 0.288 | 6.87E-61 | 33 | IGFBP5   | Immune-NK cells |
| 1.01E-23  | 0.47740156 | 0.721 | 0.352 | 3.40E-19 | 33 | ATP5G1   | Immune-NK cells |
| 1.67E-22  | 0.47451675 | 0.913 | 0.715 | 5.62E-18 | 33 | NDUFA4   | Immune-NK cells |
| 1.20E-23  | 0.47380444 | 0.929 | 0.617 | 4.06E-19 | 33 | COX4I1   | Immune-NK cells |
| 3.16E-32  | 0.47208972 | 0.65  | 0.243 | 1.06E-27 | 33 | PFN2     | Immune-NK cells |
| 5.20E-25  | 0.47057856 | 0.601 | 0.263 | 1.75E-20 | 33 | SRI      | Immune-NK cells |
| 2.02E-25  | 0.46981253 | 0.667 | 0.303 | 6.82E-21 | 33 | COX5A    | Immune-NK cells |
| 7.13E-23  | 0.46980117 | 0.738 | 0.376 | 2.40E-18 | 33 | SLC25A3  | Immune-NK cells |
| 6.32E-38  | 0.46883312 | 0.672 | 0.237 | 2.13E-33 | 33 | ABARAPL  | Immune-NK cells |
| 2.64E-18  | 0.46864798 | 0.825 | 0.564 | 8.90E-14 | 33 | S100A11  | Immune-NK cells |
| 1.54E-20  | 0.4686368  | 0.88  | 0.577 | 5.19E-16 | 33 | COX5B    | Immune-NK cells |
| 3.74E-84  | 0.46842153 | 0.503 | 0.085 | 1.26E-79 | 33 | MTRNR2L1 | Immune-NK cells |
| 4.58E-34  | 0.46154399 | 0.519 | 0.169 | 1.54E-29 | 33 | SLC25A4  | Immune-NK cells |
| 1.25E-22  | 0.46104776 | 0.929 | 0.683 | 4.21E-18 | 33 | SAT1     | Immune-NK cells |
| 4.86E-32  | 0.46067388 | 0.486 | 0.154 | 1.64E-27 | 33 | RBBP8    | Immune-NK cells |
| 2.57E-19  | 0.45831453 | 0.781 | 0.462 | 8.65E-15 | 33 | CHCHD2   | Immune-NK cells |
| 4.20E-31  | 0.45740869 | 0.552 | 0.194 | 1.41E-26 | 33 | PPP2R1A  | Immune-NK cells |
| 6.64E-48  | 0.4548481  | 0.443 | 0.101 | 2.24E-43 | 33 | LHX1     | Immune-NK cells |
| 9.07E-46  | 0.4511216  | 0.492 | 0.125 | 3.06E-41 | 33 | TBC1D9   | Immune-NK cells |
| 2.51E-60  | 0.44979362 | 0.443 | 0.087 | 8.47E-56 | 33 | FOLR3    | Immune-NK cells |
| 8.65E-37  | 0.44972741 | 0.454 | 0.129 | 2.91E-32 | 33 | DYNLT3   | Immune-NK cells |
| 9.15E-41  | 0.44935234 | 0.475 | 0.13  | 3.08E-36 | 33 | TBC1D1   | Immune-NK cells |
| 4.01E-44  | 0.44597586 | 0.459 | 0.114 | 1.35E-39 | 33 | MSMO1    | Immune-NK cells |
| 3.50E-20  | 0.44590047 | 0.885 | 0.619 | 1.18E-15 | 33 | ATP5L    | Immune-NK cells |
| 5.36E-82  | 0.44293498 | 0.486 | 0.078 | 1.80E-77 | 33 | ATP6V1G3 | Immune-NK cells |
| 3.73E-25  | 0.44258142 | 0.656 | 0.289 | 1.26E-20 | 33 | ATP5C1   | Immune-NK cells |
| 5.24E-30  | 0.44164522 | 0.443 | 0.137 | 1.76E-25 | 33 | SCPEP1   | Immune-NK cells |
| 8.27E-16  | 0.44044758 | 0.847 | 0.67  | 2.79E-11 | 33 | RPS2     | Immune-NK cells |
| 8.32E-46  | 0.43905889 | 0.366 | 0.077 | 2.80E-41 | 33 | RRAGD    | Immune-NK cells |
| 4.93E-21  | 0.43827749 | 0.88  | 0.503 | 1.66E-16 | 33 | COX8A    | Immune-NK cells |
| 3.05E-33  | 0.43801964 | 0.557 | 0.191 | 1.03E-28 | 33 | LAPTM4B  | Immune-NK cells |
| 2.82E-18  | 0.43686747 | 0.77  | 0.505 | 9.49E-14 | 33 | HLA-A    | Immune-NK cells |
| 7.55E-65  | 0.43565518 | 0.47  | 0.091 | 2.55E-60 | 33 | INC01503 | Immune-NK cells |
| 2.59E-24  | 0.43533991 | 0.683 | 0.31  | 8.73E-20 | 33 | IFITM2   | Immune-NK cells |
| 1.15E-19  | 0.43336023 | 0.792 | 0.464 | 3.87E-15 | 33 | ATP5D    | Immune-NK cells |
| 1.19E-24  | 0.43273107 | 0.667 | 0.29  | 4.02E-20 | 33 | GHITM    | Immune-NK cells |
| 5.98E-35  | 0.43056914 | 0.519 | 0.155 | 2.02E-30 | 33 | CLCNKB   | Immune-NK cells |
| 4.60E-16  | 0.42799949 | 0.76  | 0.495 | 1.55E-11 | 33 | TMEM59   | Immune-NK cells |
| 1.88E-29  | 0.42771518 | 0.29  | 0.07  | 6.35E-25 | 33 | PVALB    | Immune-NK cells |
| 3.80E-36  | 0.42757551 | 0.661 | 0.237 | 1.28E-31 | 33 | NDUFB5   | Immune-NK cells |
| 1.32E-20  | 0.4253593  | 0.689 | 0.352 | 4.46E-16 | 33 | SPCS1    | Immune-NK cells |

|           |            |       |       |          |    |          |                 |
|-----------|------------|-------|-------|----------|----|----------|-----------------|
| 4.01E-46  | 0.42529687 | 0.541 | 0.149 | 1.35E-41 | 33 | SLC25A39 | Immune-NK cells |
| 5.21E-47  | 0.42498285 | 0.563 | 0.154 | 1.76E-42 | 33 | DSG2     | Immune-NK cells |
| 3.53E-15  | 0.42429376 | 0.683 | 0.399 | 1.19E-10 | 33 | CD59     | Immune-NK cells |
| 7.64E-34  | 0.42347722 | 0.475 | 0.144 | 2.57E-29 | 33 | INC00152 | Immune-NK cells |
| 3.24E-36  | 0.42338373 | 0.492 | 0.148 | 1.09E-31 | 33 | MKKS     | Immune-NK cells |
| 4.28E-27  | 0.4231645  | 0.596 | 0.237 | 1.44E-22 | 33 | HACD3    | Immune-NK cells |
| 4.97E-31  | 0.42106195 | 0.448 | 0.136 | 1.67E-26 | 33 | HSPA6    | Immune-NK cells |
| 6.30E-16  | 0.42081088 | 0.754 | 0.487 | 2.12E-11 | 33 | HSPE1    | Immune-NK cells |
| 1.16E-31  | 0.42062446 | 0.645 | 0.231 | 3.89E-27 | 33 | CA2      | Immune-NK cells |
| 1.71E-26  | 0.42043509 | 0.65  | 0.271 | 5.77E-22 | 33 | ATP5F1   | Immune-NK cells |
| 1.59E-28  | 0.41942604 | 0.612 | 0.239 | 5.36E-24 | 33 | HIGD2A   | Immune-NK cells |
| 8.41E-100 | 0.41857001 | 0.344 | 0.037 | 2.83E-95 | 33 | SLIT2    | Immune-NK cells |
| 3.00E-32  | 0.4174466  | 0.579 | 0.205 | 1.01E-27 | 33 | ITGAV    | Immune-NK cells |
| 3.40E-27  | 0.41517645 | 0.443 | 0.145 | 1.15E-22 | 33 | RCAN1    | Immune-NK cells |
| 1.59E-16  | 0.41493913 | 0.803 | 0.544 | 5.37E-12 | 33 | CD63     | Immune-NK cells |
| 1.30E-42  | 0.41464596 | 0.53  | 0.15  | 4.38E-38 | 33 | ZMPSTE24 | Immune-NK cells |
| 6.23E-17  | 0.41405487 | 0.743 | 0.43  | 2.10E-12 | 33 | TPI1     | Immune-NK cells |
| 7.87E-33  | 0.41296269 | 0.574 | 0.194 | 2.65E-28 | 33 | HSPA9    | Immune-NK cells |
| 1.53E-17  | 0.41168918 | 0.672 | 0.355 | 5.15E-13 | 33 | PRDX2    | Immune-NK cells |
| 6.29E-27  | 0.41157516 | 0.727 | 0.31  | 2.12E-22 | 33 | HSPA5    | Immune-NK cells |
| 1.49E-27  | 0.41156983 | 0.738 | 0.325 | 5.02E-23 | 33 | VDAC1    | Immune-NK cells |
| 6.25E-21  | 0.40998928 | 0.699 | 0.344 | 2.11E-16 | 33 | COA3     | Immune-NK cells |
| 3.54E-23  | 0.40923356 | 0.787 | 0.369 | 1.19E-18 | 33 | CDH16    | Immune-NK cells |
| 6.13E-36  | 0.40859894 | 0.437 | 0.12  | 2.07E-31 | 33 | HMGCS1   | Immune-NK cells |
| 6.41E-32  | 0.40858411 | 0.639 | 0.235 | 2.16E-27 | 33 | APOE     | Immune-NK cells |
| 1.78E-18  | 0.4045081  | 0.923 | 0.706 | 5.99E-14 | 33 | IGFBP7   | Immune-NK cells |
| 9.33E-38  | 0.40433961 | 0.557 | 0.174 | 3.14E-33 | 33 | LIMA1    | Immune-NK cells |
| 2.01E-17  | 0.40048913 | 0.689 | 0.363 | 6.76E-13 | 33 | NDUFC2   | Immune-NK cells |
| 3.35E-23  | 0.39970097 | 0.667 | 0.305 | 1.13E-18 | 33 | DDT      | Immune-NK cells |
| 6.37E-25  | 0.39878697 | 0.738 | 0.327 | 2.15E-20 | 33 | NDUFA5   | Immune-NK cells |
| 2.07E-31  | 0.39773583 | 0.574 | 0.205 | 6.99E-27 | 33 | DHRS7    | Immune-NK cells |
| 2.44E-57  | 0.39726682 | 0.399 | 0.076 | 8.22E-53 | 33 | GRB14    | Immune-NK cells |
| 2.08E-38  | 0.39470415 | 0.399 | 0.097 | 7.01E-34 | 33 | SERPINA5 | Immune-NK cells |
| 1.19E-27  | 0.39299831 | 0.694 | 0.281 | 4.00E-23 | 33 | GDF15    | Immune-NK cells |
| 3.46E-27  | 0.39209141 | 0.574 | 0.22  | 1.16E-22 | 33 | CYC1     | Immune-NK cells |
| 1.97E-37  | 0.38961075 | 0.546 | 0.171 | 6.63E-33 | 33 | PPIC     | Immune-NK cells |
| 1.23E-27  | 0.38863824 | 0.59  | 0.223 | 4.16E-23 | 33 | CLDN7    | Immune-NK cells |
| 9.00E-39  | 0.38650961 | 0.596 | 0.187 | 3.03E-34 | 33 | PLEKHB2  | Immune-NK cells |
| 1.06E-26  | 0.38615354 | 0.568 | 0.212 | 3.56E-22 | 33 | C8orf4   | Immune-NK cells |
| 1.30E-18  | 0.38610551 | 0.913 | 0.642 | 4.37E-14 | 33 | UQCRCQ   | Immune-NK cells |
| 2.36E-82  | 0.38563597 | 0.333 | 0.041 | 7.96E-78 | 33 | C1orf168 | Immune-NK cells |
| 2.55E-49  | 0.38463343 | 0.454 | 0.103 | 8.61E-45 | 33 | PHLDA1   | Immune-NK cells |
| 1.56E-21  | 0.3833146  | 0.612 | 0.27  | 5.25E-17 | 33 | KRT8     | Immune-NK cells |
| 6.98E-16  | 0.38268131 | 0.836 | 0.527 | 2.35E-11 | 33 | ATP5J    | Immune-NK cells |
| 1.66E-14  | 0.38167312 | 0.705 | 0.397 | 5.60E-10 | 33 | ENO1     | Immune-NK cells |
| 3.99E-28  | 0.37918014 | 0.486 | 0.16  | 1.35E-23 | 33 | UHMK1    | Immune-NK cells |
| 4.10E-17  | 0.37807293 | 0.628 | 0.326 | 1.38E-12 | 33 | ISCU     | Immune-NK cells |
| 2.74E-15  | 0.3773959  | 0.754 | 0.428 | 9.24E-11 | 33 | DBI      | Immune-NK cells |

|           |            |       |       |          |    |          |                 |
|-----------|------------|-------|-------|----------|----|----------|-----------------|
| 6.39E-36  | 0.37734472 | 0.443 | 0.123 | 2.15E-31 | 33 | SNX10    | Immune-NK cells |
| 3.05E-33  | 0.37719463 | 0.454 | 0.132 | 1.03E-28 | 33 | EPS8     | Immune-NK cells |
| 4.92E-15  | 0.37017156 | 0.721 | 0.407 | 1.66E-10 | 33 | CYSTM1   | Immune-NK cells |
| 3.63E-38  | 0.37003864 | 0.492 | 0.14  | 1.22E-33 | 33 | HPRT1    | Immune-NK cells |
| 1.46E-27  | 0.36978013 | 0.546 | 0.2   | 4.91E-23 | 33 | ATP6V1E1 | Immune-NK cells |
| 1.28E-45  | 0.3694294  | 0.333 | 0.065 | 4.31E-41 | 33 | TMPRSS2  | Immune-NK cells |
| 4.97E-25  | 0.36921353 | 0.536 | 0.207 | 1.67E-20 | 33 | RNF213   | Immune-NK cells |
| 3.66E-24  | 0.3689306  | 0.792 | 0.358 | 1.23E-19 | 33 | MUC1     | Immune-NK cells |
| 3.42E-16  | 0.36772513 | 0.792 | 0.469 | 1.15E-11 | 33 | CFL1     | Immune-NK cells |
| 3.22E-13  | 0.36750197 | 0.727 | 0.465 | 1.08E-08 | 33 | MYL12B   | Immune-NK cells |
| 1.03E-14  | 0.36544172 | 0.891 | 0.673 | 3.46E-10 | 33 | EIF1     | Immune-NK cells |
| 4.97E-36  | 0.3653093  | 0.514 | 0.152 | 1.67E-31 | 33 | PPARGC1A | Immune-NK cells |
| 1.31E-30  | 0.36517154 | 0.497 | 0.156 | 4.42E-26 | 33 | CLCNKA   | Immune-NK cells |
| 1.31E-34  | 0.36473456 | 0.262 | 0.053 | 4.40E-30 | 33 | TFAP2A   | Immune-NK cells |
| 4.40E-30  | 0.36071618 | 0.454 | 0.141 | 1.48E-25 | 33 | COPRS    | Immune-NK cells |
| 5.93E-56  | 0.360673   | 0.35  | 0.061 | 2.00E-51 | 33 | OXCT1    | Immune-NK cells |
| 8.68E-20  | 0.36033942 | 0.628 | 0.284 | 2.92E-15 | 33 | COX7A2L  | Immune-NK cells |
| 4.33E-139 | 0.35951386 | 0.393 | 0.035 | #####    | 33 | ATP6V1C2 | Immune-NK cells |
| 1.52E-33  | 0.357646   | 0.47  | 0.138 | 5.11E-29 | 33 | ABCA5    | Immune-NK cells |
| 1.15E-43  | 0.35609858 | 0.41  | 0.097 | 3.86E-39 | 33 | MEM106   | Immune-NK cells |
| 1.22E-28  | 0.35573482 | 0.53  | 0.186 | 4.11E-24 | 33 | CBR1     | Immune-NK cells |
| 1.63E-13  | 0.35494771 | 0.842 | 0.591 | 5.51E-09 | 33 | SKP1     | Immune-NK cells |
| 2.02E-20  | 0.35486804 | 0.645 | 0.299 | 6.82E-16 | 33 | NDUFB3   | Immune-NK cells |
| 1.70E-24  | 0.35412297 | 0.541 | 0.201 | 5.73E-20 | 33 | RPS4Y1   | Immune-NK cells |
| 1.05E-19  | 0.35268982 | 0.508 | 0.205 | 3.52E-15 | 33 | PTP4A1   | Immune-NK cells |
| 3.05E-21  | 0.35265283 | 0.601 | 0.261 | 1.03E-16 | 33 | ARHGAP29 | Immune-NK cells |
| 1.25E-24  | 0.35250069 | 0.568 | 0.219 | 4.21E-20 | 33 | XBP1     | Immune-NK cells |
| 8.46E-25  | 0.35238714 | 0.579 | 0.231 | 2.85E-20 | 33 | SDHC     | Immune-NK cells |
| 2.48E-28  | 0.35173505 | 0.612 | 0.233 | 8.37E-24 | 33 | NFAT5    | Immune-NK cells |
| 7.43E-21  | 0.35148248 | 0.727 | 0.35  | 2.50E-16 | 33 | ATP6V1F  | Immune-NK cells |
| 2.31E-25  | 0.35127021 | 0.59  | 0.237 | 7.78E-21 | 33 | NDUFA12  | Immune-NK cells |
| 5.00E-29  | 0.35094954 | 0.645 | 0.234 | 1.69E-24 | 33 | HSD11B2  | Immune-NK cells |
| 8.08E-22  | 0.34972948 | 0.661 | 0.295 | 2.72E-17 | 33 | PDIA3    | Immune-NK cells |
| 2.92E-26  | 0.34934703 | 0.574 | 0.221 | 9.84E-22 | 33 | NDUFV2   | Immune-NK cells |
| 2.83E-23  | 0.34862512 | 0.585 | 0.243 | 9.54E-19 | 33 | REEP5    | Immune-NK cells |
| 1.72E-13  | 0.34859872 | 0.918 | 0.729 | 5.81E-09 | 33 | SERF2    | Immune-NK cells |
| 4.70E-16  | 0.34791294 | 0.705 | 0.382 | 1.58E-11 | 33 | ALDOA    | Immune-NK cells |
| 4.08E-14  | 0.34654984 | 0.847 | 0.599 | 1.37E-09 | 33 | COX7A2   | Immune-NK cells |
| 1.33E-29  | 0.34651333 | 0.486 | 0.157 | 4.49E-25 | 33 | NEDD4L   | Immune-NK cells |
| 3.55E-50  | 0.34560781 | 0.344 | 0.065 | 1.20E-45 | 33 | BPGM     | Immune-NK cells |
| 1.09E-38  | 0.34424679 | 0.301 | 0.062 | 3.67E-34 | 33 | FAM102A  | Immune-NK cells |
| 3.02E-21  | 0.34372708 | 0.601 | 0.263 | 1.02E-16 | 33 | ARF4     | Immune-NK cells |
| 1.07E-36  | 0.34365329 | 0.377 | 0.095 | 3.61E-32 | 33 | MRPL15   | Immune-NK cells |
| 6.04E-28  | 0.34292376 | 0.53  | 0.188 | 2.03E-23 | 33 | ADGRG1   | Immune-NK cells |
| 1.87E-23  | 0.3415492  | 0.317 | 0.092 | 6.28E-19 | 33 | TBX2     | Immune-NK cells |
| 8.25E-18  | 0.3409273  | 0.672 | 0.337 | 2.78E-13 | 33 | PRDX6    | Immune-NK cells |
| 1.83E-16  | 0.3408119  | 0.716 | 0.365 | 6.15E-12 | 33 | SPINT2   | Immune-NK cells |
| 5.01E-34  | 0.34009709 | 0.47  | 0.141 | 1.69E-29 | 33 | CLN5     | Immune-NK cells |

|          |            |       |       |          |    |          |                 |
|----------|------------|-------|-------|----------|----|----------|-----------------|
| 1.56E-23 | 0.3399944  | 0.563 | 0.226 | 5.24E-19 | 33 | VDAC2    | Immune-NK cells |
| 3.72E-27 | 0.33985721 | 0.585 | 0.222 | 1.25E-22 | 33 | INC00969 | Immune-NK cells |
| 2.12E-25 | 0.33970011 | 0.508 | 0.185 | 7.14E-21 | 33 | SDHD     | Immune-NK cells |
| 8.75E-12 | 0.33934227 | 0.787 | 0.558 | 2.95E-07 | 33 | GAPDH    | Immune-NK cells |
| 8.19E-30 | 0.33920521 | 0.525 | 0.178 | 2.76E-25 | 33 | ENSA     | Immune-NK cells |
| 2.08E-28 | 0.33848081 | 0.393 | 0.116 | 7.01E-24 | 33 | GPI      | Immune-NK cells |
| 9.64E-36 | 0.33736131 | 0.421 | 0.114 | 3.25E-31 | 33 | CCNG1    | Immune-NK cells |
| 2.89E-22 | 0.33654486 | 0.617 | 0.263 | 9.75E-18 | 33 | STAT3    | Immune-NK cells |
| 1.09E-23 | 0.33579839 | 0.568 | 0.229 | 3.66E-19 | 33 | ALDH1A1  | Immune-NK cells |
| 4.66E-53 | 0.33537371 | 0.361 | 0.068 | 1.57E-48 | 33 | ST5      | Immune-NK cells |
| 4.89E-42 | 0.33513773 | 0.514 | 0.14  | 1.65E-37 | 33 | ARHGAP18 | Immune-NK cells |
| 1.87E-24 | 0.33473618 | 0.486 | 0.179 | 6.31E-20 | 33 | NDUFS2   | Immune-NK cells |
| 6.22E-25 | 0.33431229 | 0.552 | 0.214 | 2.10E-20 | 33 | HADHB    | Immune-NK cells |
| 3.51E-28 | 0.33398702 | 0.377 | 0.11  | 1.18E-23 | 33 | SLC25A11 | Immune-NK cells |
| 3.58E-13 | 0.33215984 | 0.874 | 0.726 | 1.21E-08 | 33 | RPL8     | Immune-NK cells |
| 2.38E-11 | 0.33194013 | 0.842 | 0.714 | 8.03E-07 | 33 | RPL15    | Immune-NK cells |
| 1.32E-31 | 0.33193955 | 0.464 | 0.143 | 4.46E-27 | 33 | 11-532F1 | Immune-NK cells |
| 1.95E-62 | 0.33144509 | 0.383 | 0.065 | 6.57E-58 | 33 | ERO1A    | Immune-NK cells |
| 3.06E-20 | 0.3304547  | 0.344 | 0.116 | 1.03E-15 | 33 | NDFIP2   | Immune-NK cells |
| 7.99E-32 | 0.33022485 | 0.311 | 0.075 | 2.69E-27 | 33 | HOXA9    | Immune-NK cells |
| 1.54E-13 | 0.33017834 | 0.792 | 0.503 | 5.20E-09 | 33 | NDUFS5   | Immune-NK cells |
| 9.11E-26 | 0.32999371 | 0.421 | 0.138 | 3.07E-21 | 33 | ITGA6    | Immune-NK cells |
| 1.97E-34 | 0.32934893 | 0.393 | 0.103 | 6.64E-30 | 33 | ADGRF1   | Immune-NK cells |
| 1.25E-13 | 0.32831042 | 0.738 | 0.472 | 4.21E-09 | 33 | ATP6V0E1 | Immune-NK cells |
| 6.91E-33 | 0.32803864 | 0.399 | 0.11  | 2.33E-28 | 33 | TPD52L1  | Immune-NK cells |
| 1.15E-20 | 0.32691447 | 0.612 | 0.268 | 3.86E-16 | 33 | CIB1     | Immune-NK cells |
| 4.81E-40 | 0.32690752 | 0.443 | 0.113 | 1.62E-35 | 33 | PRSS23   | Immune-NK cells |
| 1.07E-12 | 0.32678273 | 0.836 | 0.584 | 3.62E-08 | 33 | NDUFB2   | Immune-NK cells |
| 5.52E-20 | 0.32622436 | 0.536 | 0.226 | 1.86E-15 | 33 | TMEM147  | Immune-NK cells |
| 2.58E-14 | 0.32589391 | 0.596 | 0.311 | 8.71E-10 | 33 | SELM     | Immune-NK cells |
| 3.02E-29 | 0.32565951 | 0.579 | 0.207 | 1.02E-24 | 33 | PTBP3    | Immune-NK cells |
| 5.72E-27 | 0.32550935 | 0.372 | 0.11  | 1.93E-22 | 33 | WWP1     | Immune-NK cells |
| 2.92E-18 | 0.32527876 | 0.71  | 0.351 | 9.83E-14 | 33 | VAPA     | Immune-NK cells |
| 2.70E-12 | 0.32519335 | 0.896 | 0.748 | 9.08E-08 | 33 | RPL7     | Immune-NK cells |
| 2.93E-39 | 0.32517166 | 0.372 | 0.087 | 9.88E-35 | 33 | PPP2R5A  | Immune-NK cells |
| 7.86E-14 | 0.32510435 | 0.918 | 0.644 | 2.65E-09 | 33 | ACTG1    | Immune-NK cells |
| 1.06E-14 | 0.32464904 | 0.874 | 0.537 | 3.57E-10 | 33 | TMBIM6   | Immune-NK cells |
| 4.73E-13 | 0.32412584 | 0.88  | 0.598 | 1.59E-08 | 33 | PPIA     | Immune-NK cells |
| 4.41E-20 | 0.32367723 | 0.514 | 0.21  | 1.49E-15 | 33 | WDR1     | Immune-NK cells |
| 2.13E-12 | 0.32317571 | 0.787 | 0.536 | 7.19E-08 | 33 | COX6A1   | Immune-NK cells |
| 1.14E-21 | 0.32119023 | 0.344 | 0.111 | 3.85E-17 | 33 | SEL1L    | Immune-NK cells |
| 2.63E-36 | 0.32101285 | 0.268 | 0.053 | 8.85E-32 | 33 | CXCL3    | Immune-NK cells |
| 5.67E-27 | 0.32045551 | 0.393 | 0.119 | 1.91E-22 | 33 | NNT      | Immune-NK cells |
| 6.34E-25 | 0.32038902 | 0.383 | 0.119 | 2.14E-20 | 33 | CCT5     | Immune-NK cells |
| 1.77E-32 | 0.31803948 | 0.426 | 0.12  | 5.95E-28 | 33 | UCHL1    | Immune-NK cells |
| 7.01E-24 | 0.31730824 | 0.492 | 0.181 | 2.36E-19 | 33 | PHB      | Immune-NK cells |
| 5.72E-27 | 0.31719625 | 0.399 | 0.122 | 1.93E-22 | 33 | CXCL2    | Immune-NK cells |
| 8.37E-18 | 0.31711808 | 0.989 | 0.743 | 2.82E-13 | 33 | ATP1B1   | Immune-NK cells |

|          |            |       |       |          |    |          |                 |
|----------|------------|-------|-------|----------|----|----------|-----------------|
| 1.05E-20 | 0.31702286 | 0.464 | 0.175 | 3.55E-16 | 33 | SUCLG2   | Immune-NK cells |
| 4.16E-17 | 0.31612826 | 0.574 | 0.264 | 1.40E-12 | 33 | HIPK2    | Immune-NK cells |
| 4.82E-57 | 0.31580076 | 0.311 | 0.049 | 1.63E-52 | 33 | SCN2A    | Immune-NK cells |
| 1.53E-17 | 0.31540903 | 0.53  | 0.242 | 5.14E-13 | 33 | PSMB3    | Immune-NK cells |
| 1.95E-14 | 0.31517341 | 0.825 | 0.483 | 6.58E-10 | 33 | NDUFA3   | Immune-NK cells |
| 2.95E-49 | 0.31471327 | 0.35  | 0.066 | 9.95E-45 | 33 | RCAN2    | Immune-NK cells |
| 3.14E-28 | 0.31468866 | 0.29  | 0.071 | 1.06E-23 | 33 | SLC9A3R1 | Immune-NK cells |
| 1.04E-14 | 0.31348086 | 0.65  | 0.336 | 3.50E-10 | 33 | C4orf3   | Immune-NK cells |
| 7.30E-15 | 0.31234125 | 0.721 | 0.389 | 2.46E-10 | 33 | MGST3    | Immune-NK cells |
| 9.01E-47 | 0.31158599 | 0.383 | 0.081 | 3.03E-42 | 33 | EXOSC7   | Immune-NK cells |
| 1.27E-25 | 0.31155299 | 0.464 | 0.158 | 4.27E-21 | 33 | FAM3C    | Immune-NK cells |
| 2.16E-33 | 0.31081502 | 0.35  | 0.087 | 7.28E-29 | 33 | BACE2    | Immune-NK cells |
| 6.62E-23 | 0.31049711 | 0.552 | 0.216 | 2.23E-18 | 33 | MACF1    | Immune-NK cells |
| 1.49E-24 | 0.30927124 | 0.432 | 0.147 | 5.02E-20 | 33 | LYPLAL1  | Immune-NK cells |
| 1.29E-19 | 0.30797892 | 0.596 | 0.266 | 4.36E-15 | 33 | NDUFS7   | Immune-NK cells |
| 2.46E-80 | 0.30791863 | 0.295 | 0.033 | 8.29E-76 | 33 | HEPACAM2 | Immune-NK cells |
| 1.57E-29 | 0.30781002 | 0.448 | 0.139 | 5.28E-25 | 33 | PLEKHJ1  | Immune-NK cells |
| 2.30E-24 | 0.30757402 | 0.541 | 0.209 | 7.74E-20 | 33 | SELT     | Immune-NK cells |
| 8.43E-23 | 0.3075515  | 0.563 | 0.23  | 2.84E-18 | 33 | C9orf16  | Immune-NK cells |
| 9.88E-62 | 0.30688723 | 0.301 | 0.043 | 3.33E-57 | 33 | SNTB1    | Immune-NK cells |
| 5.17E-19 | 0.30649389 | 0.628 | 0.297 | 1.74E-14 | 33 | PDIA6    | Immune-NK cells |
| 1.03E-54 | 0.30583543 | 0.295 | 0.046 | 3.47E-50 | 33 | CDA      | Immune-NK cells |
| 3.87E-25 | 0.30548891 | 0.284 | 0.075 | 1.30E-20 | 33 | IDH3A    | Immune-NK cells |
| 8.07E-14 | 0.30546524 | 0.705 | 0.392 | 2.72E-09 | 33 | SPCS2    | Immune-NK cells |
| 8.30E-25 | 0.30514275 | 0.552 | 0.208 | 2.80E-20 | 33 | PCBD1    | Immune-NK cells |
| 4.11E-26 | 0.30505853 | 0.41  | 0.131 | 1.38E-21 | 33 | NDUFA9   | Immune-NK cells |
| 8.20E-28 | 0.30503526 | 0.355 | 0.1   | 2.76E-23 | 33 | R4435-2H | Immune-NK cells |
| 1.37E-27 | 0.30490773 | 0.257 | 0.06  | 4.61E-23 | 33 | HMGCR    | Immune-NK cells |
| 2.13E-19 | 0.30478839 | 0.503 | 0.207 | 7.18E-15 | 33 | NFRSF12A | Immune-NK cells |
| 7.46E-26 | 0.30408639 | 0.514 | 0.183 | 2.51E-21 | 33 | ATP6AP1  | Immune-NK cells |
| 3.06E-29 | 0.30343401 | 0.333 | 0.089 | 1.03E-24 | 33 | PLGRKT   | Immune-NK cells |
| 2.92E-19 | 0.30321668 | 0.617 | 0.278 | 9.85E-15 | 33 | PGK1     | Immune-NK cells |
| 1.08E-19 | 0.30316685 | 0.781 | 0.449 | 3.65E-15 | 33 | CD74     | Immune-NK cells |
| 1.31E-51 | 0.30286349 | 0.339 | 0.061 | 4.42E-47 | 33 | MPPED2   | Immune-NK cells |
| 6.92E-14 | 0.30268784 | 0.82  | 0.514 | 2.33E-09 | 33 | UQCR10   | Immune-NK cells |
| 1.26E-48 | 0.30262507 | 0.306 | 0.054 | 4.23E-44 | 33 | TMEM116  | Immune-NK cells |
| 1.40E-23 | 0.300695   | 0.399 | 0.13  | 4.71E-19 | 33 | CNPPD1   | Immune-NK cells |
| 6.49E-22 | 0.30053451 | 0.464 | 0.174 | 2.19E-17 | 33 | LYPLA1   | Immune-NK cells |
| 8.37E-26 | 0.30041156 | 0.322 | 0.09  | 2.82E-21 | 33 | SAV1     | Immune-NK cells |
| 4.80E-24 | 0.30013364 | 0.519 | 0.195 | 1.62E-19 | 33 | PPA1     | Immune-NK cells |
| 9.01E-24 | 0.30008339 | 0.508 | 0.189 | 3.04E-19 | 33 | CDK2AP2  | Immune-NK cells |
| 1.35E-10 | 0.2998206  | 0.869 | 0.609 | 4.54E-06 | 33 | USMG5    | Immune-NK cells |
| 7.51E-17 | 0.29942533 | 0.645 | 0.314 | 2.53E-12 | 33 | SNU13    | Immune-NK cells |
| 5.25E-30 | 0.29931249 | 0.41  | 0.12  | 1.77E-25 | 33 | SLC35F5  | Immune-NK cells |
| 4.29E-24 | 0.29907557 | 0.574 | 0.224 | 1.45E-19 | 33 | ACAT1    | Immune-NK cells |
| 8.90E-13 | 0.29903052 | 0.716 | 0.435 | 3.00E-08 | 33 | ATP6V1G1 | Immune-NK cells |
| 4.03E-18 | 0.2989711  | 0.989 | 0.922 | 1.36E-13 | 33 | EEF1A1   | Immune-NK cells |
| 2.78E-21 | 0.29777617 | 0.47  | 0.181 | 9.36E-17 | 33 | PSMB5    | Immune-NK cells |

|          |            |       |       |          |    |          |                 |
|----------|------------|-------|-------|----------|----|----------|-----------------|
| 1.12E-17 | 0.29692793 | 0.634 | 0.307 | 3.76E-13 | 33 | NDUFS8   | Immune-NK cells |
| 8.12E-27 | 0.2964377  | 0.35  | 0.1   | 2.73E-22 | 33 | SHISA5   | Immune-NK cells |
| 7.79E-26 | 0.29639582 | 0.404 | 0.129 | 2.63E-21 | 33 | SPINT1   | Immune-NK cells |
| 1.08E-20 | 0.2951381  | 0.672 | 0.3   | 3.63E-16 | 33 | TACSTD2  | Immune-NK cells |
| 2.80E-23 | 0.29481244 | 0.432 | 0.151 | 9.43E-19 | 33 | SAT2     | Immune-NK cells |
| 1.61E-30 | 0.29338209 | 0.322 | 0.081 | 5.44E-26 | 33 | TFRC     | Immune-NK cells |
| 2.30E-24 | 0.29269114 | 0.464 | 0.163 | 7.76E-20 | 33 | CD2AP    | Immune-NK cells |
| 2.37E-22 | 0.29255798 | 0.536 | 0.21  | 7.99E-18 | 33 | NDUFS4   | Immune-NK cells |
| 5.58E-16 | 0.29222349 | 0.656 | 0.314 | 1.88E-11 | 33 | TRAM1    | Immune-NK cells |
| 2.93E-44 | 0.29141136 | 0.344 | 0.071 | 9.86E-40 | 33 | RAB25    | Immune-NK cells |
| 2.75E-25 | 0.28999656 | 0.503 | 0.181 | 9.25E-21 | 33 | ANAPC13  | Immune-NK cells |
| 6.88E-11 | 0.28975453 | 0.77  | 0.47  | 2.32E-06 | 33 | OST4     | Immune-NK cells |
| 6.75E-17 | 0.28966484 | 0.683 | 0.349 | 2.27E-12 | 33 | GUK1     | Immune-NK cells |
| 8.42E-14 | 0.28953438 | 0.798 | 0.465 | 2.84E-09 | 33 | MINOS1   | Immune-NK cells |
| 2.98E-23 | 0.28922644 | 0.388 | 0.128 | 1.00E-18 | 33 | UPP1     | Immune-NK cells |
| 1.63E-31 | 0.28901654 | 0.432 | 0.126 | 5.49E-27 | 33 | ATP6V1H  | Immune-NK cells |
| 6.16E-22 | 0.28860195 | 0.497 | 0.193 | 2.08E-17 | 33 | UQCRC2   | Immune-NK cells |
| 8.96E-25 | 0.28837444 | 0.508 | 0.182 | 3.02E-20 | 33 | DSP      | Immune-NK cells |
| 9.05E-24 | 0.28780403 | 0.372 | 0.116 | 3.05E-19 | 33 | LRPPRC   | Immune-NK cells |
| 7.59E-24 | 0.28769614 | 0.443 | 0.154 | 2.56E-19 | 33 | C1QBP    | Immune-NK cells |
| 2.29E-12 | 0.28723037 | 0.689 | 0.401 | 7.72E-08 | 33 | BSG      | Immune-NK cells |
| 2.16E-33 | 0.28672203 | 0.415 | 0.115 | 7.29E-29 | 33 | SCD5     | Immune-NK cells |
| 2.47E-23 | 0.28594889 | 0.617 | 0.254 | 8.34E-19 | 33 | MIR4458H | Immune-NK cells |
| 3.45E-30 | 0.28573832 | 0.372 | 0.103 | 1.16E-25 | 33 | DIAPH1   | Immune-NK cells |
| 4.40E-20 | 0.28501338 | 0.421 | 0.156 | 1.48E-15 | 33 | RAB11B   | Immune-NK cells |
| 2.33E-23 | 0.2840162  | 0.53  | 0.205 | 7.85E-19 | 33 | UQCRC1   | Immune-NK cells |
| 2.49E-36 | 0.28399506 | 0.41  | 0.107 | 8.38E-32 | 33 | PLPP5    | Immune-NK cells |
| 1.38E-20 | 0.28332789 | 0.514 | 0.211 | 4.66E-16 | 33 | YPEL5    | Immune-NK cells |
| 3.34E-27 | 0.28331878 | 0.481 | 0.161 | 1.12E-22 | 33 | MAP1LC3A | Immune-NK cells |
| 7.29E-18 | 0.2827705  | 0.519 | 0.218 | 2.45E-13 | 33 | RBPMS    | Immune-NK cells |
| 4.33E-13 | 0.28266478 | 0.656 | 0.355 | 1.46E-08 | 33 | VAMP8    | Immune-NK cells |
| 1.14E-14 | 0.28252534 | 0.65  | 0.324 | 3.83E-10 | 33 | GLS      | Immune-NK cells |
| 9.89E-20 | 0.28205568 | 0.661 | 0.301 | 3.33E-15 | 33 | RAB11A   | Immune-NK cells |
| 1.01E-20 | 0.28113072 | 0.557 | 0.23  | 3.41E-16 | 33 | EIF1B    | Immune-NK cells |
| 8.15E-29 | 0.28095326 | 0.475 | 0.155 | 2.75E-24 | 33 | EEF1E1   | Immune-NK cells |
| 1.47E-27 | 0.28028451 | 0.552 | 0.195 | 4.95E-23 | 33 | NDUFV1   | Immune-NK cells |
| 1.81E-16 | 0.27966967 | 0.727 | 0.368 | 6.08E-12 | 33 | CNN3     | Immune-NK cells |
| 9.01E-16 | 0.27945801 | 0.585 | 0.284 | 3.04E-11 | 33 | AURKAIP1 | Immune-NK cells |
| 7.70E-27 | 0.27935263 | 0.454 | 0.148 | 2.59E-22 | 33 | PRKAA2   | Immune-NK cells |
| 1.04E-17 | 0.27902834 | 0.59  | 0.262 | 3.49E-13 | 33 | SRSF9    | Immune-NK cells |
| 6.82E-17 | 0.27902079 | 0.497 | 0.215 | 2.30E-12 | 33 | LMAN1    | Immune-NK cells |
| 8.13E-18 | 0.2787645  | 0.721 | 0.344 | 2.74E-13 | 33 | YBX3     | Immune-NK cells |
| 2.64E-14 | 0.27861483 | 0.699 | 0.374 | 8.90E-10 | 33 | PTGES3   | Immune-NK cells |
| 5.60E-23 | 0.27801377 | 0.251 | 0.066 | 1.89E-18 | 33 | ISOC1    | Immune-NK cells |
| 1.31E-13 | 0.27713589 | 0.732 | 0.398 | 4.42E-09 | 33 | HNRNPDL  | Immune-NK cells |
| 6.95E-17 | 0.27708658 | 0.77  | 0.395 | 2.34E-12 | 33 | DAZAP2   | Immune-NK cells |
| 1.12E-26 | 0.27672386 | 0.393 | 0.121 | 3.77E-22 | 33 | PPP1R14B | Immune-NK cells |
| 2.44E-47 | 0.27577119 | 0.29  | 0.05  | 8.23E-43 | 33 | PTP4A3   | Immune-NK cells |

|          |            |       |       |          |    |          |                 |
|----------|------------|-------|-------|----------|----|----------|-----------------|
| 2.68E-15 | 0.27524634 | 0.508 | 0.235 | 9.03E-11 | 33 | HNRNPA0  | Immune-NK cells |
| 1.23E-11 | 0.27522149 | 0.902 | 0.665 | 4.15E-07 | 33 | UQCRB    | Immune-NK cells |
| 8.98E-21 | 0.27489988 | 0.464 | 0.172 | 3.03E-16 | 33 | HNRNPH2  | Immune-NK cells |
| 5.45E-43 | 0.27434851 | 0.311 | 0.06  | 1.84E-38 | 33 | 11-445F1 | Immune-NK cells |
| 3.16E-12 | 0.27431515 | 0.672 | 0.38  | 1.06E-07 | 33 | NDUFB11  | Immune-NK cells |
| 1.10E-18 | 0.27400754 | 0.634 | 0.287 | 3.70E-14 | 33 | ACADVL   | Immune-NK cells |
| 1.55E-20 | 0.27387111 | 0.372 | 0.127 | 5.22E-16 | 33 | LIMS1    | Immune-NK cells |
| 1.22E-20 | 0.27386987 | 0.574 | 0.241 | 4.10E-16 | 33 | TMEM14B  | Immune-NK cells |
| 2.45E-16 | 0.27343083 | 0.579 | 0.262 | 8.26E-12 | 33 | SF1      | Immune-NK cells |
| 1.16E-32 | 0.27300275 | 0.393 | 0.105 | 3.92E-28 | 33 | NUPR2    | Immune-NK cells |
| 1.00E-21 | 0.27295876 | 0.443 | 0.163 | 3.37E-17 | 33 | SPTSSA   | Immune-NK cells |
| 1.20E-13 | 0.27293308 | 0.956 | 0.792 | 4.03E-09 | 33 | COX7C    | Immune-NK cells |
| 1.23E-39 | 0.2727757  | 0.355 | 0.079 | 4.14E-35 | 33 | ABCC5    | Immune-NK cells |
| 9.55E-19 | 0.27246239 | 0.383 | 0.14  | 3.22E-14 | 33 | USP22    | Immune-NK cells |
| 3.25E-19 | 0.27238316 | 0.519 | 0.213 | 1.09E-14 | 33 | PAX8     | Immune-NK cells |
| 8.15E-52 | 0.27214755 | 0.383 | 0.074 | 2.74E-47 | 33 | PPP1R12B | Immune-NK cells |
| 3.14E-38 | 0.27186111 | 0.437 | 0.116 | 1.06E-33 | 33 | MRPS12   | Immune-NK cells |
| 3.79E-11 | 0.2714469  | 0.661 | 0.394 | 1.28E-06 | 33 | PRDX5    | Immune-NK cells |
| 3.50E-17 | 0.2712354  | 0.508 | 0.219 | 1.18E-12 | 33 | HNRNPF   | Immune-NK cells |
| 7.69E-67 | 0.27118265 | 0.322 | 0.046 | 2.59E-62 | 33 | SPTBN2   | Immune-NK cells |
| 5.39E-29 | 0.27112128 | 0.415 | 0.125 | 1.81E-24 | 33 | MTX2     | Immune-NK cells |
| 2.35E-23 | 0.2708548  | 0.443 | 0.157 | 7.92E-19 | 33 | NAA20    | Immune-NK cells |
| 9.31E-21 | 0.27046432 | 0.557 | 0.229 | 3.14E-16 | 33 | SNRNP70  | Immune-NK cells |
| 1.36E-19 | 0.27046383 | 0.251 | 0.072 | 4.58E-15 | 33 | G6PC3    | Immune-NK cells |
| 2.29E-17 | 0.27043138 | 0.568 | 0.258 | 7.71E-13 | 33 | MRPL51   | Immune-NK cells |
| 4.81E-17 | 0.27042094 | 0.628 | 0.3   | 1.62E-12 | 33 | NDFIP1   | Immune-NK cells |
| 4.66E-23 | 0.27035228 | 0.317 | 0.094 | 1.57E-18 | 33 | SQLE     | Immune-NK cells |
| 1.46E-22 | 0.27015901 | 0.383 | 0.127 | 4.92E-18 | 33 | TSG101   | Immune-NK cells |
| 1.94E-20 | 0.27007408 | 0.656 | 0.281 | 6.53E-16 | 33 | COBLL1   | Immune-NK cells |
| 2.20E-25 | 0.26941714 | 0.459 | 0.158 | 7.42E-21 | 33 | BDH2     | Immune-NK cells |
| 6.06E-59 | 0.26878009 | 0.273 | 0.038 | 2.04E-54 | 33 | MUC20    | Immune-NK cells |
| 1.36E-24 | 0.26796066 | 0.514 | 0.189 | 4.57E-20 | 33 | GSTO1    | Immune-NK cells |
| 1.37E-10 | 0.26792972 | 0.699 | 0.437 | 4.63E-06 | 33 | NDUFB9   | Immune-NK cells |
| 6.19E-23 | 0.26777103 | 0.415 | 0.145 | 2.08E-18 | 33 | ECI1     | Immune-NK cells |
| 3.83E-14 | 0.26732037 | 0.689 | 0.372 | 1.29E-09 | 33 | EIF3K    | Immune-NK cells |
| 7.72E-26 | 0.26624662 | 0.481 | 0.165 | 2.60E-21 | 33 | GBAS     | Immune-NK cells |
| 1.39E-13 | 0.26547215 | 0.765 | 0.438 | 4.68E-09 | 33 | ATP5J2   | Immune-NK cells |
| 1.23E-10 | 0.26538546 | 0.82  | 0.476 | 4.15E-06 | 33 | APLP2    | Immune-NK cells |
| 4.39E-10 | 0.26536711 | 0.792 | 0.499 | 1.48E-05 | 33 | MIF      | Immune-NK cells |
| 1.52E-26 | 0.26498245 | 0.404 | 0.126 | 5.10E-22 | 33 | GOT1     | Immune-NK cells |
| 3.09E-27 | 0.26395315 | 0.448 | 0.146 | 1.04E-22 | 33 | ZNF593   | Immune-NK cells |
| 1.96E-37 | 0.26383422 | 0.29  | 0.059 | 6.59E-33 | 33 | DPY19L2  | Immune-NK cells |
| 2.40E-27 | 0.26338065 | 0.421 | 0.131 | 8.09E-23 | 33 | SULT1C2  | Immune-NK cells |
| 4.73E-17 | 0.26310188 | 0.574 | 0.258 | 1.59E-12 | 33 | MRPL41   | Immune-NK cells |
| 2.63E-27 | 0.26301525 | 0.301 | 0.077 | 8.87E-23 | 33 | ALAS1    | Immune-NK cells |
| 1.21E-22 | 0.26297989 | 0.366 | 0.118 | 4.08E-18 | 33 | NEU1     | Immune-NK cells |
| 8.33E-18 | 0.2629748  | 0.366 | 0.134 | 2.81E-13 | 33 | COL6A1   | Immune-NK cells |
| 3.70E-21 | 0.26244918 | 0.448 | 0.166 | 1.25E-16 | 33 | PSMA3    | Immune-NK cells |

|           |            |       |       |          |    |          |                 |
|-----------|------------|-------|-------|----------|----|----------|-----------------|
| 8.71E-20  | 0.26159049 | 0.568 | 0.24  | 2.93E-15 | 33 | OCIAD1   | Immune-NK cells |
| 1.92E-23  | 0.26154169 | 0.361 | 0.111 | 6.45E-19 | 33 | MOB1B    | Immune-NK cells |
| 8.41E-10  | 0.2614279  | 0.814 | 0.549 | 2.83E-05 | 33 | UQCRH    | Immune-NK cells |
| 1.36E-18  | 0.25995658 | 0.459 | 0.183 | 4.59E-14 | 33 | MOB1A    | Immune-NK cells |
| 3.56E-25  | 0.25905496 | 0.475 | 0.168 | 1.20E-20 | 33 | NDUFS3   | Immune-NK cells |
| 2.44E-26  | 0.25905394 | 0.383 | 0.116 | 8.21E-22 | 33 | MRPL12   | Immune-NK cells |
| 1.58E-13  | 0.25865462 | 0.607 | 0.316 | 5.33E-09 | 33 | CAMTA1   | Immune-NK cells |
| 3.20E-16  | 0.25839621 | 0.661 | 0.327 | 1.08E-11 | 33 | HSPD1    | Immune-NK cells |
| 3.95E-18  | 0.25827056 | 0.454 | 0.178 | 1.33E-13 | 33 | LMAN2    | Immune-NK cells |
| 2.28E-51  | 0.25822857 | 0.273 | 0.042 | 7.69E-47 | 33 | SMARCD3  | Immune-NK cells |
| 9.70E-24  | 0.25792634 | 0.421 | 0.143 | 3.27E-19 | 33 | FUNDC2   | Immune-NK cells |
| 3.84E-18  | 0.25762693 | 0.41  | 0.156 | 1.30E-13 | 33 | SERTAD1  | Immune-NK cells |
| 1.68E-11  | 0.25762586 | 0.749 | 0.46  | 5.67E-07 | 33 | HLA-C    | Immune-NK cells |
| 7.62E-17  | 0.2572557  | 0.508 | 0.221 | 2.57E-12 | 33 | CITED2   | Immune-NK cells |
| 9.22E-23  | 0.25704297 | 0.372 | 0.119 | 3.11E-18 | 33 | TMEM33   | Immune-NK cells |
| 6.60E-13  | 0.25703115 | 0.617 | 0.332 | 2.22E-08 | 33 | NDUFB8   | Immune-NK cells |
| 6.59E-15  | 0.25637015 | 0.437 | 0.191 | 2.22E-10 | 33 | GTF2A2   | Immune-NK cells |
| 4.88E-09  | 0.25626121 | 0.798 | 0.565 | 0.00016  | 33 | HINT1    | Immune-NK cells |
| 5.26E-19  | 0.25608267 | 0.432 | 0.166 | 1.77E-14 | 33 | CCT6A    | Immune-NK cells |
| 1.05E-28  | 0.25495826 | 0.355 | 0.098 | 3.55E-24 | 33 | INSIG1   | Immune-NK cells |
| 1.08E-28  | 0.25428069 | 0.393 | 0.114 | 3.64E-24 | 33 | IDH3G    | Immune-NK cells |
| 3.58E-10  | 0.25424473 | 0.902 | 0.615 | 1.21E-05 | 33 | NDUFA1   | Immune-NK cells |
| 1.28E-19  | 0.25398243 | 0.448 | 0.172 | 4.31E-15 | 33 | GNB2     | Immune-NK cells |
| 8.25E-13  | 0.25348219 | 0.65  | 0.344 | 2.78E-08 | 33 | NDUFS6   | Immune-NK cells |
| 1.48E-37  | 0.25307489 | 0.361 | 0.085 | 4.98E-33 | 33 | ITPA     | Immune-NK cells |
| 3.26E-22  | 0.25294083 | 0.503 | 0.187 | 1.10E-17 | 33 | CSNK2B   | Immune-NK cells |
| 9.22E-12  | 0.25263036 | 0.689 | 0.403 | 3.11E-07 | 33 | HSPA8    | Immune-NK cells |
| 4.09E-20  | 0.25253005 | 0.508 | 0.202 | 1.38E-15 | 33 | TMED9    | Immune-NK cells |
| 1.01E-26  | 0.25232889 | 0.344 | 0.098 | 3.39E-22 | 33 | EFNA1    | Immune-NK cells |
| 2.13E-19  | 0.25232505 | 0.497 | 0.204 | 7.18E-15 | 33 | MDH1     | Immune-NK cells |
| 3.31E-14  | 0.25225502 | 0.519 | 0.242 | 1.11E-09 | 33 | AHCYL1   | Immune-NK cells |
| 3.05E-10  | 0.25164574 | 0.88  | 0.619 | 1.03E-05 | 33 | COX6B1   | Immune-NK cells |
| 1.23E-19  | 0.25150048 | 0.557 | 0.234 | 4.14E-15 | 33 | MRFAP1   | Immune-NK cells |
| 4.70E-20  | 0.25145299 | 0.541 | 0.222 | 1.58E-15 | 33 | CAPG     | Immune-NK cells |
| 4.02E-31  | 0.25142611 | 0.443 | 0.132 | 1.36E-26 | 33 | NAPA     | Immune-NK cells |
| 8.68E-25  | 0.2512873  | 0.399 | 0.128 | 2.92E-20 | 33 | MRPS35   | Immune-NK cells |
| 1.72E-49  | 0.25104352 | 0.328 | 0.059 | 5.81E-45 | 33 | DUSP15   | Immune-NK cells |
| 2.88E-22  | 0.25039593 | 0.322 | 0.098 | 9.70E-18 | 33 | STIM2    | Immune-NK cells |
| 1.29E-286 | 2.1774801  | 0.949 | 0.12  | #####    | 34 | CXCL2    | Immune-B cells  |
| 6.65E-144 | 2.06674196 | 0.972 | 0.309 | #####    | 34 | HSPA5    | Immune-B cells  |
| 0         | 1.97945727 | 0.847 | 0.05  | 0        | 34 | CXCL3    | Immune-B cells  |
| 2.82E-143 | 1.75602488 | 0.921 | 0.241 | #####    | 34 | PPP1R15A | Immune-B cells  |
| 0         | 1.57377175 | 0.672 | 0.027 | 0        | 34 | TC-425F1 | Immune-B cells  |
| 5.65E-154 | 1.38033791 | 0.831 | 0.155 | #####    | 34 | IRF1     | Immune-B cells  |
| 9.99E-229 | 1.34368502 | 0.61  | 0.054 | #####    | 34 | CXCL1    | Immune-B cells  |
| 1.21E-184 | 1.30617323 | 0.407 | 0.029 | #####    | 34 | CXCL8    | Immune-B cells  |
| 1.36E-87  | 1.29317089 | 0.847 | 0.237 | 4.59E-83 | 34 | FXVD4    | Immune-B cells  |
| 1.29E-88  | 1.2456131  | 0.893 | 0.31  | 4.35E-84 | 34 | NFKBIA   | Immune-B cells  |

|           |            |       |       |          |    |            |                |
|-----------|------------|-------|-------|----------|----|------------|----------------|
| 1.41E-181 | 1.24118178 | 0.684 | 0.084 | #####    | 34 | MTRNR2L1   | Immune-B cells |
| 1.38E-149 | 1.24066951 | 0.701 | 0.108 | #####    | 34 | MAFF       | Immune-B cells |
| 3.29E-153 | 1.23288888 | 0.644 | 0.089 | #####    | 34 | PMAIP1     | Immune-B cells |
| 2.71E-83  | 1.2103628  | 0.893 | 0.333 | 9.12E-79 | 34 | DNAJA1     | Immune-B cells |
| 9.11E-108 | 1.1991862  | 0.802 | 0.188 | #####    | 34 | B4GALT1    | Immune-B cells |
| 1.58E-78  | 1.16070947 | 0.859 | 0.304 | 5.32E-74 | 34 | HERPUD1    | Immune-B cells |
| 3.99E-80  | 1.13872721 | 0.87  | 0.281 | 1.35E-75 | 34 | GDF15      | Immune-B cells |
| 8.73E-70  | 1.10588489 | 0.853 | 0.312 | 2.94E-65 | 34 | BTG2       | Immune-B cells |
| 2.01E-87  | 1.10306619 | 0.842 | 0.246 | 6.77E-83 | 34 | CLDN4      | Immune-B cells |
| 1.18E-139 | 1.08934138 | 0.633 | 0.091 | #####    | 34 | P1-313I6.1 | Immune-B cells |
| 4.97E-58  | 1.08037412 | 0.791 | 0.291 | 1.68E-53 | 34 | MMP7       | Immune-B cells |
| 1.66E-85  | 1.05550973 | 0.638 | 0.135 | 5.59E-81 | 34 | HSPA6      | Immune-B cells |
| 1.29E-95  | 1.04937488 | 0.559 | 0.1   | 4.36E-91 | 34 | ZFAND2A    | Immune-B cells |
| 3.53E-65  | 1.04696427 | 0.898 | 0.395 | 1.19E-60 | 34 | CALR       | Immune-B cells |
| 2.93E-71  | 1.04067524 | 0.96  | 0.433 | 9.86E-67 | 34 | IER2       | Immune-B cells |
| 7.36E-72  | 1.0347944  | 0.972 | 0.463 | 2.48E-67 | 34 | JUNB       | Immune-B cells |
| 1.73E-115 | 1.01897668 | 0.898 | 0.19  | #####    | 34 | AQP2       | Immune-B cells |
| 1.75E-64  | 0.97231038 | 0.881 | 0.345 | 5.88E-60 | 34 | EPCAM      | Immune-B cells |
| 6.32E-69  | 0.94611898 | 0.729 | 0.212 | 2.13E-64 | 34 | GSTM3      | Immune-B cells |
| 1.56E-61  | 0.93438071 | 0.661 | 0.19  | 5.26E-57 | 34 | DNAJB4     | Immune-B cells |
| 7.63E-142 | 0.93032527 | 0.537 | 0.066 | #####    | 34 | NUAK2      | Immune-B cells |
| 1.00E-63  | 0.92756905 | 0.876 | 0.314 | 3.37E-59 | 34 | ELF3       | Immune-B cells |
| 4.44E-73  | 0.92034336 | 0.734 | 0.207 | 1.49E-68 | 34 | EIF5A      | Immune-B cells |
| 3.86E-67  | 0.91553969 | 0.853 | 0.273 | 1.30E-62 | 34 | KRT19      | Immune-B cells |
| 1.96E-48  | 0.91029415 | 0.825 | 0.335 | 6.61E-44 | 34 | KRT18      | Immune-B cells |
| 4.80E-51  | 0.90076094 | 0.74  | 0.27  | 1.62E-46 | 34 | KRT8       | Immune-B cells |
| 2.08E-56  | 0.88579594 | 0.825 | 0.323 | 7.01E-52 | 34 | SOD2       | Immune-B cells |
| 1.79E-56  | 0.88418579 | 0.915 | 0.378 | 6.04E-52 | 34 | GADD45B    | Immune-B cells |
| 1.04E-54  | 0.88049681 | 0.977 | 0.569 | 3.49E-50 | 34 | HSP90AB1   | Immune-B cells |
| 5.01E-67  | 0.87491736 | 0.91  | 0.314 | 1.69E-62 | 34 | ATF3       | Immune-B cells |
| 1.18E-68  | 0.86517787 | 0.678 | 0.18  | 3.97E-64 | 34 | DDIT3      | Immune-B cells |
| 1.49E-53  | 0.85748061 | 0.966 | 0.656 | 5.02E-49 | 34 | H3F3B      | Immune-B cells |
| 8.91E-93  | 0.85159125 | 0.497 | 0.08  | 3.00E-88 | 34 | ARG2       | Immune-B cells |
| 6.98E-64  | 0.84914709 | 0.588 | 0.152 | 2.35E-59 | 34 | MRPL18     | Immune-B cells |
| 5.10E-51  | 0.84430767 | 0.684 | 0.221 | 1.72E-46 | 34 | SOCS3      | Immune-B cells |
| 6.89E-21  | 0.83944317 | 0.379 | 0.136 | 2.32E-16 | 34 | SLC8A1     | Immune-B cells |
| 1.41E-76  | 0.83674002 | 0.525 | 0.102 | 4.74E-72 | 34 | PAQR7      | Immune-B cells |
| 2.69E-64  | 0.83614591 | 0.65  | 0.168 | 9.05E-60 | 34 | ID3        | Immune-B cells |
| 9.19E-30  | 0.83267911 | 0.412 | 0.129 | 3.10E-25 | 34 | RNF152     | Immune-B cells |
| 1.10E-69  | 0.82569269 | 0.559 | 0.125 | 3.70E-65 | 34 | BAG3       | Immune-B cells |
| 1.05E-49  | 0.82233257 | 0.983 | 0.625 | 3.54E-45 | 34 | UBB        | Immune-B cells |
| 2.95E-51  | 0.81376449 | 0.667 | 0.223 | 9.95E-47 | 34 | MAP1LC3B   | Immune-B cells |
| 3.86E-59  | 0.81030702 | 0.763 | 0.234 | 1.30E-54 | 34 | HSD11B2    | Immune-B cells |
| 1.43E-108 | 0.80583378 | 0.469 | 0.063 | #####    | 34 | ARL5B      | Immune-B cells |
| 3.83E-49  | 0.80339981 | 0.729 | 0.252 | 1.29E-44 | 34 | SCIN       | Immune-B cells |
| 6.11E-56  | 0.80267209 | 0.638 | 0.183 | 2.06E-51 | 34 | CYR61      | Immune-B cells |
| 3.53E-54  | 0.80227374 | 0.525 | 0.138 | 1.19E-49 | 34 | DNAJB11    | Immune-B cells |
| 3.37E-57  | 0.79472406 | 0.633 | 0.181 | 1.13E-52 | 34 | CTSH       | Immune-B cells |

|           |            |       |       |          |    |          |                |
|-----------|------------|-------|-------|----------|----|----------|----------------|
| 5.27E-49  | 0.79278788 | 0.638 | 0.207 | 1.78E-44 | 34 | PTBP3    | Immune-B cells |
| 1.85E-54  | 0.79209209 | 0.949 | 0.432 | 6.23E-50 | 34 | DNAJB1   | Immune-B cells |
| 2.87E-76  | 0.78890401 | 0.446 | 0.076 | 9.68E-72 | 34 | ALAS1    | Immune-B cells |
| 5.67E-272 | 0.78710918 | 0.424 | 0.022 | #####    | 34 | ZNF165   | Immune-B cells |
| 1.36E-106 | 0.77589544 | 0.78  | 0.15  | #####    | 34 | STC1     | Immune-B cells |
| 1.61E-227 | 0.76839998 | 0.373 | 0.02  | #####    | 34 | TNF      | Immune-B cells |
| 2.69E-48  | 0.7663825  | 0.983 | 0.601 | 9.05E-44 | 34 | JUN      | Immune-B cells |
| 4.35E-47  | 0.76013434 | 0.514 | 0.146 | 1.47E-42 | 34 | HN1      | Immune-B cells |
| 5.94E-45  | 0.75516283 | 0.864 | 0.403 | 2.00E-40 | 34 | HSPA8    | Immune-B cells |
| 4.27E-80  | 0.75430366 | 0.588 | 0.118 | 1.44E-75 | 34 | CCL2     | Immune-B cells |
| 6.71E-35  | 0.75361003 | 0.864 | 0.453 | 2.26E-30 | 34 | ITRNR2L1 | Immune-B cells |
| 1.55E-44  | 0.75247044 | 0.734 | 0.279 | 5.23E-40 | 34 | LMNA     | Immune-B cells |
| 4.48E-39  | 0.74987299 | 0.74  | 0.323 | 1.51E-34 | 34 | PNRC1    | Immune-B cells |
| 2.20E-53  | 0.73943573 | 0.525 | 0.138 | 7.43E-49 | 34 | SDF2L1   | Immune-B cells |
| 3.96E-35  | 0.73728081 | 0.492 | 0.148 | 1.34E-30 | 34 | CALB1    | Immune-B cells |
| 2.48E-36  | 0.73601825 | 0.729 | 0.327 | 8.35E-32 | 34 | HSPD1    | Immune-B cells |
| 3.33E-51  | 0.73550756 | 0.712 | 0.234 | 1.12E-46 | 34 | AMFR     | Immune-B cells |
| 1.63E-34  | 0.73411156 | 0.842 | 0.452 | 5.49E-30 | 34 | HSP90B1  | Immune-B cells |
| 4.78E-46  | 0.7334419  | 0.486 | 0.131 | 1.61E-41 | 34 | MARCKSL1 | Immune-B cells |
| 1.42E-93  | 0.72464228 | 0.435 | 0.06  | 4.78E-89 | 34 | PTGER1   | Immune-B cells |
| 4.60E-63  | 0.72258293 | 0.565 | 0.131 | 1.55E-58 | 34 | PFKFB3   | Immune-B cells |
| 1.58E-62  | 0.71650706 | 0.565 | 0.135 | 5.31E-58 | 34 | ARL4D    | Immune-B cells |
| 4.13E-51  | 0.71325011 | 0.655 | 0.198 | 1.39E-46 | 34 | TPM4     | Immune-B cells |
| 1.23E-23  | 0.71178668 | 0.78  | 0.413 | 4.14E-19 | 34 | CRYAB    | Immune-B cells |
| 1.69E-58  | 0.70260242 | 0.497 | 0.11  | 5.69E-54 | 34 | SMIM5    | Immune-B cells |
| 1.95E-39  | 0.7009275  | 0.672 | 0.262 | 6.56E-35 | 34 | DNAJB6   | Immune-B cells |
| 1.44E-36  | 0.69773998 | 0.825 | 0.393 | 4.84E-32 | 34 | RPS10    | Immune-B cells |
| 9.87E-45  | 0.69717681 | 0.785 | 0.301 | 3.33E-40 | 34 | HSPH1    | Immune-B cells |
| 1.41E-41  | 0.69658251 | 0.644 | 0.229 | 4.76E-37 | 34 | TUBB4B   | Immune-B cells |
| 4.21E-44  | 0.68946254 | 0.983 | 0.706 | 1.42E-39 | 34 | IGFBP7   | Immune-B cells |
| 4.04E-60  | 0.686632   | 0.508 | 0.114 | 1.36E-55 | 34 | RDH10    | Immune-B cells |
| 3.60E-35  | 0.68428374 | 0.955 | 0.575 | 1.21E-30 | 34 | UBC      | Immune-B cells |
| 2.06E-54  | 0.68232234 | 0.446 | 0.098 | 6.95E-50 | 34 | CADPS2   | Immune-B cells |
| 5.39E-45  | 0.67877647 | 0.638 | 0.201 | 1.82E-40 | 34 | RPS4Y1   | Immune-B cells |
| 5.49E-46  | 0.67677894 | 1     | 0.808 | 1.85E-41 | 34 | TMSB4X   | Immune-B cells |
| 3.58E-95  | 0.67484931 | 0.35  | 0.041 | 1.20E-90 | 34 | ICAM1    | Immune-B cells |
| 8.85E-79  | 0.66591381 | 0.39  | 0.058 | 2.98E-74 | 34 | MNS1     | Immune-B cells |
| 1.37E-39  | 0.66493029 | 0.678 | 0.249 | 4.61E-35 | 34 | TOB1     | Immune-B cells |
| 7.52E-58  | 0.66459539 | 0.672 | 0.177 | 2.53E-53 | 34 | AQP3     | Immune-B cells |
| 6.19E-41  | 0.66446863 | 0.78  | 0.318 | 2.08E-36 | 34 | SQSTM1   | Immune-B cells |
| 9.62E-43  | 0.66398777 | 0.859 | 0.367 | 3.24E-38 | 34 | CHCHD10  | Immune-B cells |
| 4.20E-33  | 0.6618556  | 0.768 | 0.334 | 1.41E-28 | 34 | CCNL1    | Immune-B cells |
| 9.47E-46  | 0.65998278 | 0.537 | 0.152 | 3.19E-41 | 34 | FOLR1    | Immune-B cells |
| 7.89E-53  | 0.65801442 | 0.74  | 0.231 | 2.66E-48 | 34 | CA2      | Immune-B cells |
| 1.77E-30  | 0.65727243 | 0.418 | 0.134 | 5.96E-26 | 34 | AKR1B1   | Immune-B cells |
| 5.89E-48  | 0.64637306 | 0.548 | 0.15  | 1.98E-43 | 34 | ADAMTS1  | Immune-B cells |
| 1.85E-66  | 0.64142307 | 0.401 | 0.068 | 6.25E-62 | 34 | PHKG1    | Immune-B cells |
| 1.84E-35  | 0.63451535 | 0.576 | 0.197 | 6.19E-31 | 34 | KLF10    | Immune-B cells |

|          |            |       |       |          |    |          |                |
|----------|------------|-------|-------|----------|----|----------|----------------|
| 4.48E-44 | 0.63084088 | 0.401 | 0.093 | 1.51E-39 | 34 | PHLDA2   | Immune-B cells |
| 1.53E-37 | 0.62568399 | 0.972 | 0.608 | 5.15E-33 | 34 | HSPA1A   | Immune-B cells |
| 8.76E-37 | 0.62430244 | 0.898 | 0.425 | 2.95E-32 | 34 | FOSB     | Immune-B cells |
| 1.14E-43 | 0.62365415 | 0.429 | 0.109 | 3.83E-39 | 34 | SCCPDH   | Immune-B cells |
| 5.71E-79 | 0.61857288 | 0.373 | 0.052 | 1.92E-74 | 34 | GATA2    | Immune-B cells |
| 3.21E-74 | 0.61716646 | 0.412 | 0.064 | 1.08E-69 | 34 | SCNN1G   | Immune-B cells |
| 1.29E-32 | 0.61418548 | 0.571 | 0.215 | 4.35E-28 | 34 | SNRPN    | Immune-B cells |
| 1.43E-48 | 0.61403169 | 0.559 | 0.156 | 4.81E-44 | 34 | SERTAD1  | Immune-B cells |
| 7.36E-35 | 0.61307372 | 0.706 | 0.273 | 2.48E-30 | 34 | PIGR     | Immune-B cells |
| 6.12E-68 | 0.61198154 | 0.463 | 0.089 | 2.06E-63 | 34 | HSPA4    | Immune-B cells |
| 2.17E-43 | 0.61036613 | 0.667 | 0.223 | 7.32E-39 | 34 | CLDN7    | Immune-B cells |
| 2.84E-26 | 0.60729107 | 0.819 | 0.449 | 9.57E-22 | 34 | SLC25A6  | Immune-B cells |
| 2.63E-55 | 0.60705591 | 0.565 | 0.14  | 8.87E-51 | 34 | SMIM22   | Immune-B cells |
| 3.85E-32 | 0.60678819 | 0.531 | 0.194 | 1.30E-27 | 34 | BAG1     | Immune-B cells |
| 8.09E-32 | 0.6038782  | 0.938 | 0.557 | 2.73E-27 | 34 | GAPDH    | Immune-B cells |
| 6.10E-37 | 0.60218138 | 0.48  | 0.149 | 2.05E-32 | 34 | CACYBP   | Immune-B cells |
| 6.50E-71 | 0.60185622 | 0.384 | 0.061 | 2.19E-66 | 34 | ZC3H12A  | Immune-B cells |
| 4.80E-38 | 0.60063344 | 0.565 | 0.19  | 1.62E-33 | 34 | TMED4    | Immune-B cells |
| 1.13E-36 | 0.59563459 | 0.407 | 0.112 | 3.80E-32 | 34 | IDI1     | Immune-B cells |
| 3.22E-45 | 0.59424788 | 0.435 | 0.106 | 1.08E-40 | 34 | ZC3HAV1  | Immune-B cells |
| 1.02E-31 | 0.59128531 | 0.429 | 0.13  | 3.43E-27 | 34 | RRAD     | Immune-B cells |
| 8.28E-30 | 0.58972543 | 0.655 | 0.267 | 2.79E-25 | 34 | TSPAN1   | Immune-B cells |
| 4.21E-34 | 0.5849021  | 0.74  | 0.305 | 1.42E-29 | 34 | BCAM     | Immune-B cells |
| 5.83E-32 | 0.58356507 | 0.842 | 0.431 | 1.96E-27 | 34 | SET      | Immune-B cells |
| 4.98E-45 | 0.5831529  | 0.52  | 0.137 | 1.68E-40 | 34 | GATA3    | Immune-B cells |
| 1.07E-28 | 0.58298616 | 0.859 | 0.438 | 3.62E-24 | 34 | ZFP36    | Immune-B cells |
| 1.14E-33 | 0.58114364 | 0.633 | 0.235 | 3.83E-29 | 34 | ITM2C    | Immune-B cells |
| 4.64E-38 | 0.57857081 | 0.994 | 0.677 | 1.56E-33 | 34 | FOS      | Immune-B cells |
| 2.47E-51 | 0.57852295 | 0.328 | 0.059 | 8.32E-47 | 34 | ANKRD37  | Immune-B cells |
| 2.09E-28 | 0.57813405 | 0.797 | 0.397 | 7.06E-24 | 34 | ENO1     | Immune-B cells |
| 1.14E-30 | 0.5725292  | 0.972 | 0.673 | 3.83E-26 | 34 | EIF1     | Immune-B cells |
| 7.80E-34 | 0.57105887 | 0.989 | 0.645 | 2.63E-29 | 34 | HSPA1B   | Immune-B cells |
| 3.52E-37 | 0.57091599 | 0.52  | 0.164 | 1.18E-32 | 34 | PTGR1    | Immune-B cells |
| 4.03E-35 | 0.57024127 | 0.605 | 0.219 | 1.36E-30 | 34 | XBP1     | Immune-B cells |
| 2.70E-68 | 0.56806641 | 0.367 | 0.057 | 9.10E-64 | 34 | LPCAT2   | Immune-B cells |
| 2.39E-40 | 0.56426385 | 0.475 | 0.134 | 8.06E-36 | 34 | SKIL     | Immune-B cells |
| 4.78E-34 | 0.56300265 | 0.751 | 0.308 | 1.61E-29 | 34 | TRA2A    | Immune-B cells |
| 2.68E-32 | 0.55558936 | 0.644 | 0.251 | 9.04E-28 | 34 | LITAF    | Immune-B cells |
| 4.44E-24 | 0.55520325 | 0.802 | 0.439 | 1.50E-19 | 34 | NPM1     | Immune-B cells |
| 3.07E-38 | 0.55217646 | 0.463 | 0.134 | 1.03E-33 | 34 | TOR1AIP2 | Immune-B cells |
| 1.08E-31 | 0.54969187 | 0.605 | 0.235 | 3.62E-27 | 34 | HNRNPA0  | Immune-B cells |
| 4.28E-32 | 0.54883728 | 0.689 | 0.285 | 1.44E-27 | 34 | C090498  | Immune-B cells |
| 2.06E-45 | 0.54567538 | 0.446 | 0.109 | 6.95E-41 | 34 | ABCB1    | Immune-B cells |
| 2.90E-36 | 0.54485139 | 0.441 | 0.13  | 9.78E-32 | 34 | SERINC2  | Immune-B cells |
| 1.19E-33 | 0.5448461  | 0.994 | 0.757 | 4.01E-29 | 34 | RPL3     | Immune-B cells |
| 6.46E-28 | 0.54039839 | 0.661 | 0.277 | 2.18E-23 | 34 | TUBA1B   | Immune-B cells |
| 1.44E-38 | 0.54008518 | 0.452 | 0.128 | 4.84E-34 | 34 | MANF     | Immune-B cells |
| 1.63E-42 | 0.53848548 | 0.605 | 0.19  | 5.48E-38 | 34 | NAMPT    | Immune-B cells |

|          |            |       |       |          |    |          |                |
|----------|------------|-------|-------|----------|----|----------|----------------|
| 2.74E-35 | 0.53844021 | 0.435 | 0.124 | 9.22E-31 | 34 | LRRC16A  | Immune-B cells |
| 2.08E-27 | 0.53770888 | 0.559 | 0.208 | 6.99E-23 | 34 | KRT7     | Immune-B cells |
| 2.56E-53 | 0.53763781 | 0.418 | 0.086 | 8.63E-49 | 34 | AFMID    | Immune-B cells |
| 5.18E-26 | 0.5369828  | 0.881 | 0.486 | 1.75E-21 | 34 | HSPE1    | Immune-B cells |
| 6.73E-26 | 0.53639442 | 0.367 | 0.118 | 2.27E-21 | 34 | NEU1     | Immune-B cells |
| 1.01E-26 | 0.53521283 | 0.757 | 0.367 | 3.42E-22 | 34 | CYCS     | Immune-B cells |
| 8.16E-44 | 0.53503339 | 0.367 | 0.081 | 2.75E-39 | 34 | SLC25A25 | Immune-B cells |
| 6.31E-56 | 0.53083327 | 0.458 | 0.098 | 2.12E-51 | 34 | CAPS     | Immune-B cells |
| 1.76E-28 | 0.53058126 | 0.678 | 0.295 | 5.93E-24 | 34 | PDIA3    | Immune-B cells |
| 1.02E-26 | 0.52998764 | 0.96  | 0.667 | 3.42E-22 | 34 | HSPB1    | Immune-B cells |
| 3.52E-23 | 0.52907691 | 0.853 | 0.499 | 1.18E-18 | 34 | MIF      | Immune-B cells |
| 4.45E-28 | 0.52796553 | 0.791 | 0.381 | 1.50E-23 | 34 | ALDOA    | Immune-B cells |
| 1.14E-31 | 0.52788725 | 0.74  | 0.3   | 3.85E-27 | 34 | TACSTD2  | Immune-B cells |
| 1.88E-27 | 0.52686162 | 0.469 | 0.166 | 6.33E-23 | 34 | DCDC2    | Immune-B cells |
| 1.12E-30 | 0.52658205 | 0.537 | 0.194 | 3.76E-26 | 34 | NCOA7    | Immune-B cells |
| 4.03E-23 | 0.52640862 | 0.859 | 0.496 | 1.36E-18 | 34 | HNRNPA1  | Immune-B cells |
| 1.69E-32 | 0.52341291 | 0.994 | 0.747 | 5.69E-28 | 34 | RPL7     | Immune-B cells |
| 8.80E-23 | 0.52329713 | 0.763 | 0.407 | 2.97E-18 | 34 | CYSTM1   | Immune-B cells |
| 3.13E-38 | 0.52226807 | 0.435 | 0.118 | 1.05E-33 | 34 | PNP      | Immune-B cells |
| 4.29E-89 | 0.52133326 | 0.288 | 0.029 | 1.45E-84 | 34 | LRRC75A  | Immune-B cells |
| 8.04E-28 | 0.51748867 | 0.65  | 0.277 | 2.71E-23 | 34 | AIF1L    | Immune-B cells |
| 7.56E-51 | 0.51236619 | 0.367 | 0.073 | 2.55E-46 | 34 | FAM3B    | Immune-B cells |
| 3.72E-24 | 0.51120887 | 0.898 | 0.541 | 1.25E-19 | 34 | NRNPA2B  | Immune-B cells |
| 1.81E-42 | 0.50967461 | 0.983 | 0.539 | 6.10E-38 | 34 | WFDC2    | Immune-B cells |
| 3.58E-35 | 0.50878679 | 0.446 | 0.132 | 1.21E-30 | 34 | SLC3A2   | Immune-B cells |
| 2.01E-48 | 0.50871853 | 0.429 | 0.098 | 6.77E-44 | 34 | CSRNP1   | Immune-B cells |
| 6.39E-24 | 0.50762868 | 0.537 | 0.222 | 2.15E-19 | 34 | CAPG     | Immune-B cells |
| 2.44E-24 | 0.50425122 | 0.548 | 0.23  | 8.23E-20 | 34 | C9orf16  | Immune-B cells |
| 2.20E-36 | 0.50377167 | 0.418 | 0.112 | 7.40E-32 | 34 | ADM      | Immune-B cells |
| 2.10E-32 | 0.50375631 | 0.486 | 0.158 | 7.07E-28 | 34 | TCP1     | Immune-B cells |
| 3.72E-26 | 0.5035364  | 0.497 | 0.19  | 1.25E-21 | 34 | CDK2AP2  | Immune-B cells |
| 1.08E-26 | 0.50212884 | 0.684 | 0.301 | 3.63E-22 | 34 | ID2      | Immune-B cells |
| 4.33E-29 | 0.50148991 | 0.554 | 0.211 | 1.46E-24 | 34 | YPEL5    | Immune-B cells |
| 6.69E-25 | 0.5010871  | 0.944 | 0.67  | 2.25E-20 | 34 | RPS9     | Immune-B cells |
| 1.59E-27 | 0.49886033 | 0.927 | 0.526 | 5.36E-23 | 34 | EGR1     | Immune-B cells |
| 2.93E-44 | 0.49776623 | 0.26  | 0.044 | 9.87E-40 | 34 | HOXD1    | Immune-B cells |
| 9.33E-23 | 0.49769993 | 0.932 | 0.615 | 3.14E-18 | 34 | RPL5     | Immune-B cells |
| 1.24E-17 | 0.49294956 | 0.915 | 0.561 | 4.18E-13 | 34 | CD9      | Immune-B cells |
| 4.50E-19 | 0.4922006  | 0.831 | 0.484 | 1.52E-14 | 34 | RPSA     | Immune-B cells |
| 2.07E-23 | 0.4909386  | 0.723 | 0.355 | 6.99E-19 | 34 | ATP5B    | Immune-B cells |
| 1.03E-20 | 0.48927181 | 0.78  | 0.41  | 3.46E-16 | 34 | CYB5A    | Immune-B cells |
| 4.58E-64 | 0.48689079 | 0.254 | 0.031 | 1.54E-59 | 34 | PRSS22   | Immune-B cells |
| 7.33E-28 | 0.48341337 | 0.39  | 0.12  | 2.47E-23 | 34 | HMGCS1   | Immune-B cells |
| 1.79E-24 | 0.48224764 | 0.638 | 0.283 | 6.05E-20 | 34 | ASAH1    | Immune-B cells |
| 7.34E-27 | 0.47999809 | 0.757 | 0.34  | 2.47E-22 | 34 | SDC4     | Immune-B cells |
| 2.29E-27 | 0.47994    | 0.503 | 0.182 | 7.72E-23 | 34 | STAT1    | Immune-B cells |
| 9.08E-41 | 0.47867358 | 0.407 | 0.102 | 3.06E-36 | 34 | AHSA1    | Immune-B cells |
| 2.69E-47 | 0.47699413 | 0.333 | 0.065 | 9.07E-43 | 34 | CD82     | Immune-B cells |

|          |            |       |       |          |    |          |                |
|----------|------------|-------|-------|----------|----|----------|----------------|
| 1.59E-40 | 0.47578872 | 0.345 | 0.076 | 5.35E-36 | 34 | TUBA4A   | Immune-B cells |
| 1.97E-37 | 0.47390935 | 0.328 | 0.074 | 6.63E-33 | 34 | SOCS1    | Immune-B cells |
| 2.52E-35 | 0.47185416 | 0.367 | 0.092 | 8.50E-31 | 34 | INC01503 | Immune-B cells |
| 7.59E-37 | 0.47110891 | 0.52  | 0.16  | 2.56E-32 | 34 | CREM     | Immune-B cells |
| 5.16E-44 | 0.47054843 | 0.299 | 0.057 | 1.74E-39 | 34 | EHF      | Immune-B cells |
| 1.42E-27 | 0.46875432 | 0.486 | 0.174 | 4.80E-23 | 34 | FAM213A  | Immune-B cells |
| 9.75E-23 | 0.46860535 | 0.356 | 0.119 | 3.29E-18 | 34 | TAX1BP3  | Immune-B cells |
| 8.21E-23 | 0.4682051  | 0.621 | 0.286 | 2.77E-18 | 34 | H2AFZ    | Immune-B cells |
| 8.05E-26 | 0.46680156 | 0.418 | 0.143 | 2.71E-21 | 34 | TOMM22   | Immune-B cells |
| 1.97E-30 | 0.46667022 | 0.514 | 0.176 | 6.64E-26 | 34 | KLF4     | Immune-B cells |
| 5.32E-19 | 0.46643161 | 0.655 | 0.337 | 1.79E-14 | 34 | SLC25A5  | Immune-B cells |
| 2.64E-20 | 0.46627408 | 0.475 | 0.195 | 8.91E-16 | 34 | IFRD1    | Immune-B cells |
| 3.13E-22 | 0.45888483 | 0.74  | 0.365 | 1.05E-17 | 34 | SPINT2   | Immune-B cells |
| 8.37E-23 | 0.45409117 | 0.989 | 0.78  | 2.82E-18 | 34 | HSP90AA1 | Immune-B cells |
| 1.02E-33 | 0.45350233 | 0.294 | 0.066 | 3.45E-29 | 34 | CKS2     | Immune-B cells |
| 3.46E-22 | 0.45246257 | 0.395 | 0.143 | 1.17E-17 | 34 | HDLBP    | Immune-B cells |
| 5.94E-27 | 0.45246181 | 0.452 | 0.154 | 2.00E-22 | 34 | SUMF2    | Immune-B cells |
| 3.06E-25 | 0.45211234 | 0.831 | 0.416 | 1.03E-20 | 34 | PPP1CB   | Immune-B cells |
| 9.91E-29 | 0.45145242 | 0.384 | 0.117 | 3.34E-24 | 34 | NASP     | Immune-B cells |
| 6.18E-31 | 0.45126981 | 0.401 | 0.12  | 2.08E-26 | 34 | FKBP4    | Immune-B cells |
| 7.59E-23 | 0.44797347 | 0.605 | 0.267 | 2.56E-18 | 34 | EIF5     | Immune-B cells |
| 1.09E-35 | 0.44756267 | 0.339 | 0.081 | 3.67E-31 | 34 | EYA3     | Immune-B cells |
| 2.33E-19 | 0.4470575  | 0.751 | 0.404 | 7.84E-15 | 34 | TSC22D1  | Immune-B cells |
| 5.87E-22 | 0.44607421 | 0.39  | 0.137 | 1.98E-17 | 34 | SERPINH1 | Immune-B cells |
| 3.09E-41 | 0.44581458 | 0.407 | 0.098 | 1.04E-36 | 34 | KITLG    | Immune-B cells |
| 3.70E-34 | 0.44563864 | 0.458 | 0.136 | 1.25E-29 | 34 | IGFBP2   | Immune-B cells |
| 1.32E-33 | 0.44533396 | 0.362 | 0.094 | 4.43E-29 | 34 | KLF5     | Immune-B cells |
| 5.01E-41 | 0.44486352 | 0.333 | 0.071 | 1.69E-36 | 34 | QPRT     | Immune-B cells |
| 1.08E-29 | 0.44458485 | 0.367 | 0.105 | 3.63E-25 | 34 | CHORDC1  | Immune-B cells |
| 5.41E-21 | 0.44296645 | 0.729 | 0.375 | 1.82E-16 | 34 | PKM      | Immune-B cells |
| 3.18E-36 | 0.44209628 | 0.944 | 0.505 | 1.07E-31 | 34 | CLU      | Immune-B cells |
| 2.81E-21 | 0.43712368 | 0.712 | 0.334 | 9.47E-17 | 34 | MAL      | Immune-B cells |
| 7.98E-33 | 0.43636872 | 0.322 | 0.08  | 2.69E-28 | 34 | ARMCX2   | Immune-B cells |
| 1.83E-25 | 0.43633721 | 0.395 | 0.13  | 6.16E-21 | 34 | DNAJB9   | Immune-B cells |
| 4.07E-21 | 0.43518933 | 0.763 | 0.397 | 1.37E-16 | 34 | NPC2     | Immune-B cells |
| 4.67E-24 | 0.43220634 | 0.441 | 0.161 | 1.57E-19 | 34 | PDHA1    | Immune-B cells |
| 4.78E-23 | 0.4304141  | 0.605 | 0.266 | 1.61E-18 | 34 | PPIB     | Immune-B cells |
| 2.72E-23 | 0.42873185 | 0.537 | 0.22  | 9.15E-19 | 34 | TSPYL1   | Immune-B cells |
| 6.43E-22 | 0.42785277 | 0.418 | 0.151 | 2.17E-17 | 34 | WEE1     | Immune-B cells |
| 9.32E-21 | 0.42629008 | 0.684 | 0.335 | 3.14E-16 | 34 | HNRNPU   | Immune-B cells |
| 1.16E-23 | 0.425215   | 0.441 | 0.159 | 3.92E-19 | 34 | PARD6B   | Immune-B cells |
| 5.77E-24 | 0.42326555 | 0.39  | 0.132 | 1.95E-19 | 34 | CPVL     | Immune-B cells |
| 7.70E-19 | 0.42239726 | 0.367 | 0.137 | 2.60E-14 | 34 | HEXIM1   | Immune-B cells |
| 7.51E-25 | 0.42193129 | 0.294 | 0.082 | 2.53E-20 | 34 | MLF1     | Immune-B cells |
| 6.63E-27 | 0.42193087 | 0.322 | 0.091 | 2.24E-22 | 34 | GIPC1    | Immune-B cells |
| 7.85E-18 | 0.41899819 | 0.915 | 0.574 | 2.64E-13 | 34 | GSTP1    | Immune-B cells |
| 2.44E-26 | 0.41724721 | 0.446 | 0.154 | 8.22E-22 | 34 | RBBP8    | Immune-B cells |
| 1.78E-23 | 0.41654639 | 0.379 | 0.13  | 6.01E-19 | 34 | ARF5     | Immune-B cells |

|          |            |       |       |          |    |           |                |
|----------|------------|-------|-------|----------|----|-----------|----------------|
| 2.65E-17 | 0.41618733 | 0.944 | 0.633 | 8.93E-13 | 34 | MYL6      | Immune-B cells |
| 5.80E-34 | 0.41540054 | 0.395 | 0.106 | 1.95E-29 | 34 | DNAJA4    | Immune-B cells |
| 5.45E-29 | 0.41486985 | 0.384 | 0.113 | 1.83E-24 | 34 | MYADM     | Immune-B cells |
| 7.47E-27 | 0.4146379  | 0.35  | 0.104 | 2.52E-22 | 34 | EIF4A3    | Immune-B cells |
| 5.57E-17 | 0.41458298 | 0.61  | 0.315 | 1.88E-12 | 34 | PARK7     | Immune-B cells |
| 2.18E-19 | 0.41418788 | 0.718 | 0.357 | 7.35E-15 | 34 | CEBPD     | Immune-B cells |
| 6.54E-42 | 0.41051653 | 0.435 | 0.107 | 2.20E-37 | 34 | RGS2      | Immune-B cells |
| 1.37E-21 | 0.41047138 | 0.39  | 0.142 | 4.63E-17 | 34 | PPFIBP1   | Immune-B cells |
| 1.73E-18 | 0.41021622 | 0.503 | 0.221 | 5.84E-14 | 34 | CITED2    | Immune-B cells |
| 4.62E-34 | 0.41016682 | 0.435 | 0.122 | 1.56E-29 | 34 | ST6GAL1   | Immune-B cells |
| 1.41E-21 | 0.40958086 | 0.305 | 0.095 | 4.75E-17 | 34 | HIST1H1C  | Immune-B cells |
| 1.70E-16 | 0.40851357 | 0.893 | 0.596 | 5.72E-12 | 34 | PPDPF     | Immune-B cells |
| 2.72E-16 | 0.40827703 | 0.768 | 0.43  | 9.17E-12 | 34 | TPI1      | Immune-B cells |
| 2.38E-20 | 0.40796913 | 0.977 | 0.67  | 8.03E-16 | 34 | RPS2      | Immune-B cells |
| 2.00E-20 | 0.40779584 | 0.633 | 0.294 | 6.73E-16 | 34 | ATP6AP2   | Immune-B cells |
| 3.06E-39 | 0.40755905 | 0.328 | 0.071 | 1.03E-34 | 34 | SLC16A3   | Immune-B cells |
| 1.61E-23 | 0.4071779  | 0.571 | 0.237 | 5.44E-19 | 34 | MYO6      | Immune-B cells |
| 1.28E-18 | 0.40691284 | 0.525 | 0.233 | 4.33E-14 | 34 | STMN1     | Immune-B cells |
| 3.47E-44 | 0.40605303 | 0.254 | 0.042 | 1.17E-39 | 34 | TBC1D7    | Immune-B cells |
| 1.23E-20 | 0.40509809 | 0.503 | 0.213 | 4.15E-16 | 34 | ARF1      | Immune-B cells |
| 2.40E-17 | 0.40413836 | 0.718 | 0.394 | 8.07E-13 | 34 | PRDX5     | Immune-B cells |
| 6.32E-20 | 0.40356651 | 0.497 | 0.207 | 2.13E-15 | 34 | MAL2      | Immune-B cells |
| 7.64E-54 | 0.40339004 | 0.26  | 0.037 | 2.57E-49 | 34 | MAP3K8    | Immune-B cells |
| 1.05E-28 | 0.40225136 | 0.294 | 0.074 | 3.55E-24 | 34 | UBE2S     | Immune-B cells |
| 1.89E-18 | 0.40113508 | 0.65  | 0.325 | 6.36E-14 | 34 | SELK      | Immune-B cells |
| 3.83E-22 | 0.40081201 | 0.559 | 0.237 | 1.29E-17 | 34 | HIGD1A    | Immune-B cells |
| 7.93E-23 | 0.400438   | 0.48  | 0.176 | 2.67E-18 | 34 | TMEM213   | Immune-B cells |
| 4.54E-20 | 0.40025281 | 0.571 | 0.253 | 1.53E-15 | 34 | WTAP      | Immune-B cells |
| 8.46E-18 | 0.39934872 | 0.955 | 0.599 | 2.85E-13 | 34 | RPL7A     | Immune-B cells |
| 3.57E-28 | 0.39839553 | 0.373 | 0.11  | 1.20E-23 | 34 | DCUN1D1   | Immune-B cells |
| 2.85E-17 | 0.39723931 | 0.808 | 0.445 | 9.59E-13 | 34 | PRDX1     | Immune-B cells |
| 2.66E-28 | 0.39649977 | 0.446 | 0.145 | 8.95E-24 | 34 | BTG3      | Immune-B cells |
| 7.54E-56 | 0.3947537  | 0.266 | 0.037 | 2.54E-51 | 34 | 11-670E13 | Immune-B cells |
| 2.17E-51 | 0.39457361 | 0.288 | 0.047 | 7.32E-47 | 34 | H2AFX     | Immune-B cells |
| 2.05E-20 | 0.3944559  | 0.395 | 0.149 | 6.91E-16 | 34 | GPRC5C    | Immune-B cells |
| 5.17E-17 | 0.3942786  | 0.299 | 0.106 | 1.74E-12 | 34 | HOXB6     | Immune-B cells |
| 7.20E-23 | 0.39236362 | 0.503 | 0.191 | 2.43E-18 | 34 | ID1       | Immune-B cells |
| 1.68E-14 | 0.39219681 | 0.808 | 0.519 | 5.65E-10 | 34 | DYNLL1    | Immune-B cells |
| 1.38E-18 | 0.39192018 | 0.605 | 0.29  | 4.63E-14 | 34 | ARPC3     | Immune-B cells |
| 3.22E-18 | 0.3915369  | 0.972 | 0.713 | 1.08E-13 | 34 | RPL15     | Immune-B cells |
| 2.65E-22 | 0.39077514 | 0.373 | 0.127 | 8.94E-18 | 34 | MKNK2     | Immune-B cells |
| 2.10E-20 | 0.3907516  | 0.463 | 0.185 | 7.07E-16 | 34 | PLSCR1    | Immune-B cells |
| 6.35E-25 | 0.39071    | 0.384 | 0.125 | 2.14E-20 | 34 | TUBA1C    | Immune-B cells |
| 7.12E-28 | 0.39062352 | 0.339 | 0.095 | 2.40E-23 | 34 | MYH10     | Immune-B cells |
| 8.26E-23 | 0.39018017 | 0.644 | 0.281 | 2.78E-18 | 34 | COBLL1    | Immune-B cells |
| 2.41E-19 | 0.39016611 | 0.661 | 0.313 | 8.11E-15 | 34 | NFKBIZ    | Immune-B cells |
| 3.26E-23 | 0.38864595 | 0.288 | 0.082 | 1.10E-18 | 34 | PFKP      | Immune-B cells |
| 5.01E-33 | 0.38849562 | 0.35  | 0.09  | 1.69E-28 | 34 | BCL10     | Immune-B cells |

|          |            |       |       |          |    |          |                |
|----------|------------|-------|-------|----------|----|----------|----------------|
| 1.18E-18 | 0.38844545 | 0.96  | 0.648 | 3.98E-14 | 34 | CD24     | Immune-B cells |
| 2.82E-22 | 0.38827942 | 0.435 | 0.163 | 9.51E-18 | 34 | GINM1    | Immune-B cells |
| 8.00E-21 | 0.38815084 | 0.446 | 0.171 | 2.69E-16 | 34 | SLC38A1  | Immune-B cells |
| 4.60E-56 | 0.38536345 | 0.266 | 0.037 | 1.55E-51 | 34 | CST6     | Immune-B cells |
| 1.13E-16 | 0.38510903 | 0.836 | 0.469 | 3.81E-12 | 34 | CFL1     | Immune-B cells |
| 1.72E-21 | 0.38506163 | 0.768 | 0.39  | 5.79E-17 | 34 | ARL6IP1  | Immune-B cells |
| 6.12E-29 | 0.38350366 | 0.322 | 0.083 | 2.06E-24 | 34 | S100A1   | Immune-B cells |
| 7.47E-25 | 0.38331442 | 0.266 | 0.069 | 2.52E-20 | 34 | SERTAD3  | Immune-B cells |
| 5.13E-19 | 0.38306893 | 0.565 | 0.26  | 1.73E-14 | 34 | SRSF7    | Immune-B cells |
| 8.62E-22 | 0.38030701 | 0.395 | 0.14  | 2.90E-17 | 34 | PIM3     | Immune-B cells |
| 2.30E-15 | 0.37851129 | 0.881 | 0.551 | 7.75E-11 | 34 | DDX5     | Immune-B cells |
| 1.07E-16 | 0.3784721  | 0.661 | 0.339 | 3.60E-12 | 34 | SAP18    | Immune-B cells |
| 1.01E-16 | 0.37806905 | 0.429 | 0.185 | 3.39E-12 | 34 | FKBP8    | Immune-B cells |
| 1.10E-18 | 0.37754672 | 0.554 | 0.255 | 3.72E-14 | 34 | SLC38A2  | Immune-B cells |
| 1.35E-38 | 0.37706235 | 0.305 | 0.063 | 4.56E-34 | 34 | MXD1     | Immune-B cells |
| 5.34E-22 | 0.37444608 | 0.305 | 0.093 | 1.80E-17 | 34 | CD55     | Immune-B cells |
| 2.08E-31 | 0.37362481 | 0.266 | 0.059 | 7.01E-27 | 34 | JMJD6    | Immune-B cells |
| 3.53E-24 | 0.37360782 | 0.328 | 0.099 | 1.19E-19 | 34 | TMED5    | Immune-B cells |
| 4.42E-18 | 0.37310818 | 0.531 | 0.241 | 1.49E-13 | 34 | ERP29    | Immune-B cells |
| 6.19E-18 | 0.3726585  | 0.367 | 0.142 | 2.09E-13 | 34 | PPA2     | Immune-B cells |
| 2.15E-34 | 0.3715737  | 0.316 | 0.072 | 7.26E-30 | 34 | PHACTR1  | Immune-B cells |
| 1.21E-15 | 0.37075967 | 0.831 | 0.49  | 4.08E-11 | 34 | RPLP0    | Immune-B cells |
| 6.55E-27 | 0.36756935 | 0.339 | 0.097 | 2.21E-22 | 34 | INC01116 | Immune-B cells |
| 1.77E-22 | 0.36723282 | 0.26  | 0.071 | 5.95E-18 | 34 | RAB25    | Immune-B cells |
| 3.25E-26 | 0.36570232 | 0.994 | 0.922 | 1.10E-21 | 34 | EEF1A1   | Immune-B cells |
| 9.02E-26 | 0.36556989 | 0.356 | 0.109 | 3.04E-21 | 34 | PQLC3    | Immune-B cells |
| 5.84E-16 | 0.36551987 | 0.582 | 0.297 | 1.97E-11 | 34 | SERP1    | Immune-B cells |
| 2.40E-28 | 0.36493964 | 0.373 | 0.109 | 8.09E-24 | 34 | SYTL2    | Immune-B cells |
| 1.16E-34 | 0.36489349 | 0.294 | 0.064 | 3.92E-30 | 34 | RAP2B    | Immune-B cells |
| 5.47E-14 | 0.36475644 | 0.898 | 0.564 | 1.84E-09 | 34 | S100A11  | Immune-B cells |
| 4.35E-19 | 0.36419266 | 0.26  | 0.08  | 1.47E-14 | 34 | LSR      | Immune-B cells |
| 4.70E-26 | 0.36129382 | 1     | 0.743 | 1.58E-21 | 34 | ATP1B1   | Immune-B cells |
| 5.68E-21 | 0.3603249  | 0.463 | 0.18  | 1.91E-16 | 34 | CDKN1A   | Immune-B cells |
| 5.68E-16 | 0.3597765  | 0.475 | 0.213 | 1.91E-11 | 34 | PAX8     | Immune-B cells |
| 6.40E-21 | 0.35919102 | 0.61  | 0.276 | 2.15E-16 | 34 | RALBP1   | Immune-B cells |
| 3.54E-15 | 0.35897172 | 0.791 | 0.451 | 1.19E-10 | 34 | BTF3     | Immune-B cells |
| 2.62E-15 | 0.35840813 | 0.819 | 0.465 | 8.83E-11 | 34 | MYL12B   | Immune-B cells |
| 1.06E-22 | 0.35724772 | 0.339 | 0.107 | 3.58E-18 | 34 | ZNF503   | Immune-B cells |
| 1.62E-20 | 0.35707975 | 0.497 | 0.205 | 5.46E-16 | 34 | DHRS7    | Immune-B cells |
| 4.84E-15 | 0.3570507  | 0.678 | 0.355 | 1.63E-10 | 34 | LDHA     | Immune-B cells |
| 1.26E-17 | 0.35600871 | 0.328 | 0.119 | 4.26E-13 | 34 | SLC39A6  | Immune-B cells |
| 2.20E-14 | 0.35518565 | 0.525 | 0.262 | 7.42E-10 | 34 | ARHGAP29 | Immune-B cells |
| 9.35E-14 | 0.35514938 | 0.915 | 0.644 | 3.15E-09 | 34 | ACTG1    | Immune-B cells |
| 1.59E-13 | 0.35503453 | 0.915 | 0.62  | 5.36E-09 | 34 | RPL14    | Immune-B cells |
| 2.07E-15 | 0.35495716 | 0.537 | 0.264 | 6.97E-11 | 34 | ARF4     | Immune-B cells |
| 5.68E-26 | 0.35492899 | 0.282 | 0.072 | 1.91E-21 | 34 | SYNC     | Immune-B cells |
| 1.91E-13 | 0.35296342 | 0.797 | 0.481 | 6.44E-09 | 34 | PFN1     | Immune-B cells |
| 8.02E-15 | 0.35290669 | 0.701 | 0.387 | 2.70E-10 | 34 | SRSF3    | Immune-B cells |

|          |            |       |       |          |    |           |                |
|----------|------------|-------|-------|----------|----|-----------|----------------|
| 1.56E-16 | 0.35184544 | 0.876 | 0.528 | 5.27E-12 | 34 | YWHAE     | Immune-B cells |
| 1.46E-35 | 0.35103583 | 0.373 | 0.091 | 4.91E-31 | 34 | PAPPA     | Immune-B cells |
| 2.56E-22 | 0.35055835 | 0.339 | 0.107 | 8.64E-18 | 34 | REL       | Immune-B cells |
| 4.32E-28 | 0.35033971 | 0.424 | 0.134 | 1.46E-23 | 34 | RAB11FIP1 | Immune-B cells |
| 2.35E-17 | 0.3497542  | 0.469 | 0.204 | 7.91E-13 | 34 | EIF4A1    | Immune-B cells |
| 4.80E-24 | 0.34828625 | 0.339 | 0.103 | 1.62E-19 | 34 | KDM6B     | Immune-B cells |
| 1.11E-14 | 0.34796998 | 0.825 | 0.462 | 3.74E-10 | 34 | CHCHD2    | Immune-B cells |
| 6.37E-18 | 0.34792995 | 0.554 | 0.254 | 2.15E-13 | 34 | GPBP1     | Immune-B cells |
| 2.55E-13 | 0.34778873 | 0.576 | 0.308 | 8.59E-09 | 34 | SRSF2     | Immune-B cells |
| 7.40E-13 | 0.34751387 | 0.797 | 0.502 | 2.49E-08 | 34 | YBX1      | Immune-B cells |
| 1.84E-20 | 0.34749569 | 0.429 | 0.166 | 6.19E-16 | 34 | CCT6A     | Immune-B cells |
| 2.80E-17 | 0.34661944 | 0.994 | 0.903 | 9.44E-13 | 34 | PTMA      | Immune-B cells |
| 1.78E-27 | 0.34443786 | 0.305 | 0.079 | 5.98E-23 | 34 | GMNN      | Immune-B cells |
| 1.26E-36 | 0.34342514 | 0.26  | 0.049 | 4.24E-32 | 34 | NHSL1     | Immune-B cells |
| 4.51E-31 | 0.34311353 | 0.379 | 0.101 | 1.52E-26 | 34 | LHX1      | Immune-B cells |
| 4.26E-15 | 0.34279584 | 0.418 | 0.185 | 1.44E-10 | 34 | SDHD      | Immune-B cells |
| 2.14E-16 | 0.34138633 | 0.356 | 0.14  | 7.20E-12 | 34 | DDX6      | Immune-B cells |
| 7.38E-17 | 0.33984501 | 0.571 | 0.266 | 2.49E-12 | 34 | SRSF6     | Immune-B cells |
| 2.89E-19 | 0.33971117 | 0.678 | 0.327 | 9.75E-15 | 34 | NDUFA5    | Immune-B cells |
| 2.10E-20 | 0.33949343 | 0.305 | 0.095 | 7.08E-16 | 34 | PTPRS     | Immune-B cells |
| 7.02E-17 | 0.33910262 | 0.486 | 0.22  | 2.37E-12 | 34 | HNRNPF    | Immune-B cells |
| 1.14E-27 | 0.33877058 | 0.322 | 0.086 | 3.85E-23 | 34 | SGPP1     | Immune-B cells |
| 9.01E-17 | 0.33763509 | 0.401 | 0.167 | 3.04E-12 | 34 | TBCB      | Immune-B cells |
| 5.73E-15 | 0.33723274 | 0.39  | 0.167 | 1.93E-10 | 34 | CCT3      | Immune-B cells |
| 1.48E-20 | 0.33671212 | 0.35  | 0.12  | 5.00E-16 | 34 | MYLIP     | Immune-B cells |
| 2.24E-15 | 0.33667423 | 0.379 | 0.16  | 7.54E-11 | 34 | PPP1R10   | Immune-B cells |
| 1.83E-22 | 0.33605821 | 0.333 | 0.104 | 6.16E-18 | 34 | ARL4A     | Immune-B cells |
| 9.60E-22 | 0.33511097 | 0.379 | 0.131 | 3.24E-17 | 34 | HNRNPL    | Immune-B cells |
| 2.63E-21 | 0.33444002 | 0.356 | 0.119 | 8.87E-17 | 34 | SLC16A4   | Immune-B cells |
| 7.32E-17 | 0.33350207 | 0.412 | 0.174 | 2.47E-12 | 34 | KDELRL1   | Immune-B cells |
| 3.92E-17 | 0.33281047 | 0.367 | 0.143 | 1.32E-12 | 34 | AFF1      | Immune-B cells |
| 1.44E-29 | 0.33077243 | 0.266 | 0.06  | 4.87E-25 | 34 | 11-445F1  | Immune-B cells |
| 1.73E-13 | 0.33071489 | 0.559 | 0.297 | 5.84E-09 | 34 | PDIA6     | Immune-B cells |
| 4.00E-12 | 0.33041617 | 0.395 | 0.188 | 1.35E-07 | 34 | LRPAP1    | Immune-B cells |
| 3.04E-13 | 0.32920739 | 0.373 | 0.17  | 1.02E-08 | 34 | MDH2      | Immune-B cells |
| 3.61E-20 | 0.32841428 | 0.373 | 0.134 | 1.22E-15 | 34 | TEX264    | Immune-B cells |
| 5.61E-16 | 0.32814216 | 0.35  | 0.138 | 1.89E-11 | 34 | C5orf15   | Immune-B cells |
| 4.83E-22 | 0.3270565  | 0.299 | 0.09  | 1.63E-17 | 34 | FUCA1     | Immune-B cells |
| 5.50E-20 | 0.32641252 | 0.384 | 0.139 | 1.85E-15 | 34 | CXADR     | Immune-B cells |
| 1.74E-14 | 0.32633567 | 0.859 | 0.503 | 5.86E-10 | 34 | COX8A     | Immune-B cells |
| 6.42E-12 | 0.32627597 | 0.927 | 0.635 | 2.16E-07 | 34 | RPL10A    | Immune-B cells |
| 1.44E-19 | 0.32592788 | 0.446 | 0.178 | 4.87E-15 | 34 | ENSA      | Immune-B cells |
| 3.01E-11 | 0.32494913 | 0.881 | 0.616 | 1.01E-06 | 34 | RPL24     | Immune-B cells |
| 5.88E-17 | 0.32455859 | 0.35  | 0.133 | 1.98E-12 | 34 | MGMT      | Immune-B cells |
| 1.21E-13 | 0.32453107 | 0.52  | 0.261 | 4.07E-09 | 34 | BRD2      | Immune-B cells |
| 7.96E-16 | 0.32433259 | 0.853 | 0.511 | 2.68E-11 | 34 | RTN4      | Immune-B cells |
| 4.86E-16 | 0.32370572 | 0.492 | 0.227 | 1.64E-11 | 34 | ECHS1     | Immune-B cells |
| 1.02E-12 | 0.3233953  | 0.842 | 0.503 | 3.45E-08 | 34 | PEBP1     | Immune-B cells |

|          |            |       |       |          |    |          |                |
|----------|------------|-------|-------|----------|----|----------|----------------|
| 7.98E-15 | 0.32331109 | 0.52  | 0.254 | 2.69E-10 | 34 | RBM3     | Immune-B cells |
| 1.90E-14 | 0.32287908 | 0.729 | 0.389 | 6.40E-10 | 34 | MGST3    | Immune-B cells |
| 2.07E-12 | 0.32179496 | 0.966 | 0.741 | 6.96E-08 | 34 | RPS3A    | Immune-B cells |
| 6.16E-19 | 0.32169557 | 0.362 | 0.133 | 2.07E-14 | 34 | CHMP2B   | Immune-B cells |
| 3.57E-11 | 0.32150334 | 0.294 | 0.126 | 1.20E-06 | 34 | PLEKHH2  | Immune-B cells |
| 8.22E-11 | 0.32118628 | 0.458 | 0.244 | 2.77E-06 | 34 | REEP5    | Immune-B cells |
| 2.94E-14 | 0.32029275 | 0.588 | 0.303 | 9.92E-10 | 34 | COX5A    | Immune-B cells |
| 4.72E-13 | 0.31861074 | 0.751 | 0.45  | 1.59E-08 | 34 | CALM1    | Immune-B cells |
| 7.56E-15 | 0.31757195 | 0.746 | 0.401 | 2.55E-10 | 34 | BSG      | Immune-B cells |
| 7.76E-23 | 0.31685319 | 0.288 | 0.082 | 2.61E-18 | 34 | PRPS2    | Immune-B cells |
| 3.42E-16 | 0.31628946 | 0.548 | 0.26  | 1.15E-11 | 34 | ANXA5    | Immune-B cells |
| 1.45E-13 | 0.31492303 | 0.322 | 0.134 | 4.89E-09 | 34 | DNAJB14  | Immune-B cells |
| 1.28E-14 | 0.31477229 | 0.412 | 0.178 | 4.32E-10 | 34 | D-3252C9 | Immune-B cells |
| 2.36E-15 | 0.31414875 | 0.91  | 0.564 | 7.97E-11 | 34 | DUSP1    | Immune-B cells |
| 1.88E-12 | 0.31316507 | 0.395 | 0.188 | 6.33E-08 | 34 | ALKBH7   | Immune-B cells |
| 1.18E-20 | 0.3131203  | 0.407 | 0.149 | 3.97E-16 | 34 | IFI6     | Immune-B cells |
| 4.35E-11 | 0.31305954 | 0.944 | 0.661 | 1.47E-06 | 34 | RPS3     | Immune-B cells |
| 3.62E-18 | 0.31234728 | 0.277 | 0.088 | 1.22E-13 | 34 | WDR43    | Immune-B cells |
| 6.58E-14 | 0.31211447 | 0.452 | 0.212 | 2.22E-09 | 34 | GRN      | Immune-B cells |
| 9.60E-14 | 0.31209818 | 0.576 | 0.299 | 3.23E-09 | 34 | BRK1     | Immune-B cells |
| 3.05E-11 | 0.31174189 | 0.333 | 0.152 | 1.03E-06 | 34 | G3BP2    | Immune-B cells |
| 1.97E-13 | 0.31161414 | 0.441 | 0.21  | 6.64E-09 | 34 | KCNQ1OT1 | Immune-B cells |
| 1.32E-16 | 0.31065961 | 0.814 | 0.445 | 4.44E-12 | 34 | HES1     | Immune-B cells |
| 3.49E-14 | 0.30956998 | 0.452 | 0.208 | 1.18E-09 | 34 | PCBD1    | Immune-B cells |
| 3.39E-13 | 0.3092881  | 0.672 | 0.376 | 1.14E-08 | 34 | SLC25A3  | Immune-B cells |
| 1.36E-13 | 0.30923738 | 0.379 | 0.169 | 4.58E-09 | 34 | HSD17B10 | Immune-B cells |
| 6.21E-16 | 0.30899606 | 0.893 | 0.545 | 2.09E-11 | 34 | HNRNPH1  | Immune-B cells |
| 1.82E-18 | 0.30796701 | 0.254 | 0.078 | 6.14E-14 | 34 | WASH1    | Immune-B cells |
| 7.80E-23 | 0.30779452 | 0.288 | 0.082 | 2.63E-18 | 34 | HYOU1    | Immune-B cells |
| 1.19E-13 | 0.30731526 | 0.492 | 0.242 | 4.01E-09 | 34 | PSMB3    | Immune-B cells |
| 3.90E-11 | 0.30679129 | 0.311 | 0.14  | 1.32E-06 | 34 | EIF3I    | Immune-B cells |
| 1.84E-13 | 0.30661574 | 0.588 | 0.305 | 6.21E-09 | 34 | DDT      | Immune-B cells |
| 2.43E-13 | 0.30656124 | 0.463 | 0.226 | 8.20E-09 | 34 | RTN3     | Immune-B cells |
| 1.23E-23 | 0.30633831 | 0.616 | 0.241 | 4.15E-19 | 34 | RASD1    | Immune-B cells |
| 5.73E-10 | 0.3055957  | 0.277 | 0.123 | 1.93E-05 | 34 | INADL    | Immune-B cells |
| 2.36E-13 | 0.30555373 | 0.39  | 0.176 | 7.94E-09 | 34 | THRAP3   | Immune-B cells |
| 4.73E-21 | 0.30538593 | 0.26  | 0.074 | 1.59E-16 | 34 | VASN     | Immune-B cells |
| 1.44E-16 | 0.30514117 | 0.452 | 0.198 | 4.86E-12 | 34 | SYAP1    | Immune-B cells |
| 4.10E-12 | 0.30485788 | 0.407 | 0.2   | 1.38E-07 | 34 | NUDC     | Immune-B cells |
| 5.74E-11 | 0.30444904 | 0.299 | 0.134 | 1.93E-06 | 34 | APOA1BP  | Immune-B cells |
| 4.54E-12 | 0.30350472 | 0.802 | 0.473 | 1.53E-07 | 34 | RPL4     | Immune-B cells |
| 1.77E-12 | 0.30252674 | 0.345 | 0.154 | 5.97E-08 | 34 | ANP32E   | Immune-B cells |
| 3.40E-15 | 0.30180999 | 0.847 | 0.481 | 1.14E-10 | 34 | CDC42    | Immune-B cells |
| 1.32E-15 | 0.30097912 | 0.395 | 0.168 | 4.44E-11 | 34 | MAPK1IP1 | Immune-B cells |
| 2.84E-23 | 0.30067124 | 0.254 | 0.066 | 9.57E-19 | 34 | TMPRSS2  | Immune-B cells |
| 8.76E-13 | 0.30055084 | 0.763 | 0.447 | 2.95E-08 | 34 | EIF4A2   | Immune-B cells |
| 1.18E-13 | 0.29941673 | 0.667 | 0.355 | 3.99E-09 | 34 | PRDX2    | Immune-B cells |
| 1.90E-15 | 0.29871908 | 0.48  | 0.22  | 6.41E-11 | 34 | CYC1     | Immune-B cells |

|          |            |       |       |          |    |          |                |
|----------|------------|-------|-------|----------|----|----------|----------------|
| 2.99E-12 | 0.29812789 | 0.39  | 0.182 | 1.01E-07 | 34 | PHB      | Immune-B cells |
| 9.50E-17 | 0.29808585 | 0.435 | 0.185 | 3.20E-12 | 34 | CCT4     | Immune-B cells |
| 1.26E-30 | 0.29795085 | 0.305 | 0.073 | 4.26E-26 | 34 | FAM84A   | Immune-B cells |
| 9.13E-20 | 0.29782108 | 0.277 | 0.085 | 3.08E-15 | 34 | IQCK     | Immune-B cells |
| 1.06E-14 | 0.29781555 | 0.463 | 0.215 | 3.58E-10 | 34 | EIF3F    | Immune-B cells |
| 4.53E-12 | 0.29761346 | 0.593 | 0.325 | 1.53E-07 | 34 | ATP5A1   | Immune-B cells |
| 2.04E-17 | 0.29652008 | 0.463 | 0.2   | 6.88E-13 | 34 | NBEAL1   | Immune-B cells |
| 8.75E-16 | 0.29643183 | 0.463 | 0.207 | 2.95E-11 | 34 | ATRAID   | Immune-B cells |
| 1.54E-13 | 0.29608275 | 0.74  | 0.394 | 5.18E-09 | 34 | SOX4     | Immune-B cells |
| 1.10E-14 | 0.29599394 | 0.328 | 0.129 | 3.71E-10 | 34 | SPINT1   | Immune-B cells |
| 8.15E-14 | 0.29547948 | 0.757 | 0.423 | 2.75E-09 | 34 | EEF2     | Immune-B cells |
| 2.05E-15 | 0.29530958 | 0.35  | 0.14  | 6.91E-11 | 34 | TTC19    | Immune-B cells |
| 3.58E-11 | 0.29365228 | 0.627 | 0.356 | 1.21E-06 | 34 | CSTB     | Immune-B cells |
| 8.05E-10 | 0.29261924 | 0.904 | 0.592 | 2.71E-05 | 34 | RPL30    | Immune-B cells |
| 4.77E-16 | 0.29236326 | 0.418 | 0.176 | 1.61E-11 | 34 | CTTN     | Immune-B cells |
| 9.90E-15 | 0.29204342 | 0.429 | 0.193 | 3.34E-10 | 34 | LGALS3BP | Immune-B cells |
| 4.29E-13 | 0.29153683 | 0.254 | 0.095 | 1.45E-08 | 34 | EIF2A    | Immune-B cells |
| 1.00E-46 | 0.29094415 | 0.333 | 0.062 | 3.37E-42 | 34 | LTF      | Immune-B cells |
| 6.07E-15 | 0.29084742 | 0.373 | 0.157 | 2.05E-10 | 34 | RAB5C    | Immune-B cells |
| 1.86E-12 | 0.2905953  | 0.356 | 0.16  | 6.25E-08 | 34 | MEM179   | Immune-B cells |
| 8.28E-16 | 0.28998618 | 0.362 | 0.143 | 2.79E-11 | 34 | 11-532F1 | Immune-B cells |
| 3.21E-13 | 0.28990336 | 0.418 | 0.198 | 1.08E-08 | 34 | LAMTOR2  | Immune-B cells |
| 1.21E-15 | 0.28935673 | 0.48  | 0.221 | 4.07E-11 | 34 | BANF1    | Immune-B cells |
| 1.02E-13 | 0.28906811 | 0.429 | 0.198 | 3.42E-09 | 34 | EIF3L    | Immune-B cells |
| 5.80E-10 | 0.28895954 | 0.441 | 0.237 | 1.95E-05 | 34 | VPS29    | Immune-B cells |
| 5.29E-16 | 0.28869607 | 0.469 | 0.205 | 1.78E-11 | 34 | PTP4A1   | Immune-B cells |
| 1.75E-16 | 0.28842323 | 0.492 | 0.222 | 5.89E-12 | 34 | NDUFV2   | Immune-B cells |
| 7.63E-15 | 0.28815842 | 0.294 | 0.11  | 2.57E-10 | 34 | NAA50    | Immune-B cells |
| 4.90E-18 | 0.28807826 | 0.441 | 0.181 | 1.65E-13 | 34 | ARHGAP5  | Immune-B cells |
| 1.37E-17 | 0.2878401  | 0.407 | 0.163 | 4.62E-13 | 34 | SPTSSA   | Immune-B cells |
| 1.95E-13 | 0.28767525 | 0.486 | 0.239 | 6.57E-09 | 34 | C6orf48  | Immune-B cells |
| 2.43E-10 | 0.28712028 | 0.898 | 0.627 | 8.19E-06 | 34 | RPL29    | Immune-B cells |
| 2.02E-09 | 0.28711544 | 0.435 | 0.232 | 6.82E-05 | 34 | RAB13    | Immune-B cells |
| 3.18E-19 | 0.28710084 | 0.379 | 0.138 | 1.07E-14 | 34 | SCPEP1   | Immune-B cells |
| 1.43E-14 | 0.2868687  | 0.836 | 0.46  | 4.83E-10 | 34 | HLA-C    | Immune-B cells |
| 4.20E-14 | 0.28666819 | 0.718 | 0.396 | 1.42E-09 | 34 | HNRNPC   | Immune-B cells |
| 1.19E-14 | 0.28579265 | 0.271 | 0.098 | 4.00E-10 | 34 | EFNA1    | Immune-B cells |
| 5.99E-11 | 0.28529346 | 0.944 | 0.648 | 2.02E-06 | 34 | RPL22    | Immune-B cells |
| 2.23E-15 | 0.28481625 | 1     | 0.818 | 7.51E-11 | 34 | S100A6   | Immune-B cells |
| 1.62E-17 | 0.28446408 | 0.322 | 0.114 | 5.47E-13 | 34 | PTPN13   | Immune-B cells |
| 7.41E-12 | 0.28416662 | 0.395 | 0.191 | 2.50E-07 | 34 | FAM162A  | Immune-B cells |
| 1.79E-09 | 0.28403779 | 0.328 | 0.161 | 6.03E-05 | 34 | CREBRF   | Immune-B cells |
| 1.28E-21 | 0.28389375 | 0.288 | 0.085 | 4.33E-17 | 34 | TGFBR1   | Immune-B cells |
| 7.02E-14 | 0.28381364 | 0.254 | 0.091 | 2.37E-09 | 34 | SLBP     | Immune-B cells |
| 6.06E-12 | 0.28214964 | 0.542 | 0.287 | 2.04E-07 | 34 | RAN      | Immune-B cells |
| 4.19E-11 | 0.28117324 | 0.718 | 0.435 | 1.41E-06 | 34 | ATP6V1G1 | Immune-B cells |
| 6.05E-14 | 0.28102885 | 0.333 | 0.135 | 2.04E-09 | 34 | ID4      | Immune-B cells |
| 2.68E-12 | 0.28076959 | 0.373 | 0.171 | 9.03E-08 | 34 | MLF2     | Immune-B cells |

|          |            |       |       |          |    |          |                |
|----------|------------|-------|-------|----------|----|----------|----------------|
| 2.80E-15 | 0.28047109 | 0.52  | 0.245 | 9.44E-11 | 34 | SH3BGRL  | Immune-B cells |
| 1.18E-12 | 0.28027294 | 0.373 | 0.171 | 3.99E-08 | 34 | MAGED2   | Immune-B cells |
| 5.27E-25 | 0.2801339  | 0.542 | 0.194 | 1.78E-20 | 34 | C1orf56  | Immune-B cells |
| 8.55E-14 | 0.27972303 | 0.48  | 0.229 | 2.88E-09 | 34 | C4orf48  | Immune-B cells |
| 1.34E-13 | 0.27966513 | 0.52  | 0.255 | 4.51E-09 | 34 | MRPS6    | Immune-B cells |
| 3.89E-18 | 0.27914039 | 0.294 | 0.098 | 1.31E-13 | 34 | ABHD11   | Immune-B cells |
| 5.90E-17 | 0.2788249  | 0.621 | 0.296 | 1.99E-12 | 34 | FOSL2    | Immune-B cells |
| 3.45E-12 | 0.27866211 | 0.26  | 0.101 | 1.16E-07 | 34 | DAP      | Immune-B cells |
| 5.12E-23 | 0.27854218 | 0.328 | 0.098 | 1.73E-18 | 34 | INSIG1   | Immune-B cells |
| 2.19E-11 | 0.27831253 | 0.836 | 0.536 | 7.37E-07 | 34 | COX6A1   | Immune-B cells |
| 1.17E-13 | 0.27812126 | 0.294 | 0.113 | 3.95E-09 | 34 | RAP1B    | Immune-B cells |
| 4.55E-11 | 0.27770166 | 0.802 | 0.483 | 1.53E-06 | 34 | LDHB     | Immune-B cells |
| 1.38E-12 | 0.27687107 | 0.475 | 0.237 | 4.66E-08 | 34 | HACD3    | Immune-B cells |
| 2.52E-25 | 0.27679481 | 0.367 | 0.108 | 8.48E-21 | 34 | CLDN8    | Immune-B cells |
| 1.45E-14 | 0.27509052 | 0.768 | 0.419 | 4.89E-10 | 34 | ST13     | Immune-B cells |
| 1.37E-13 | 0.27506884 | 0.311 | 0.125 | 4.61E-09 | 34 | RAB5A    | Immune-B cells |
| 4.38E-18 | 0.27412354 | 0.582 | 0.259 | 1.48E-13 | 34 | FAM107B  | Immune-B cells |
| 2.03E-11 | 0.27399441 | 0.288 | 0.12  | 6.84E-07 | 34 | PPP3CA   | Immune-B cells |
| 1.37E-15 | 0.27389888 | 0.35  | 0.14  | 4.63E-11 | 34 | APEX1    | Immune-B cells |
| 1.68E-14 | 0.27373868 | 0.74  | 0.398 | 5.67E-10 | 34 | HNRNPDL  | Immune-B cells |
| 1.14E-15 | 0.27301915 | 0.39  | 0.162 | 3.85E-11 | 34 | XRN2     | Immune-B cells |
| 1.50E-19 | 0.2725408  | 0.475 | 0.188 | 5.06E-15 | 34 | PERP     | Immune-B cells |
| 2.61E-11 | 0.2723129  | 0.808 | 0.47  | 8.80E-07 | 34 | OST4     | Immune-B cells |
| 5.29E-20 | 0.27227943 | 0.475 | 0.187 | 1.78E-15 | 34 | PLS3     | Immune-B cells |
| 3.62E-15 | 0.27215965 | 0.52  | 0.247 | 1.22E-10 | 34 | RSRP1    | Immune-B cells |
| 2.11E-20 | 0.27191116 | 0.384 | 0.133 | 7.10E-16 | 34 | CDH1     | Immune-B cells |
| 2.48E-10 | 0.27190469 | 0.537 | 0.303 | 8.34E-06 | 34 | SNHG9    | Immune-B cells |
| 2.41E-14 | 0.27137706 | 0.429 | 0.195 | 8.12E-10 | 34 | HSPA9    | Immune-B cells |
| 7.65E-14 | 0.27137296 | 0.266 | 0.098 | 2.58E-09 | 34 | TPGS2    | Immune-B cells |
| 3.24E-19 | 0.27092724 | 0.418 | 0.154 | 1.09E-14 | 34 | FGL2     | Immune-B cells |
| 3.14E-16 | 0.27087217 | 0.582 | 0.277 | 1.06E-11 | 34 | CLK1     | Immune-B cells |
| 3.67E-15 | 0.27047453 | 0.418 | 0.179 | 1.24E-10 | 34 | NDUFS2   | Immune-B cells |
| 3.85E-13 | 0.27037373 | 0.328 | 0.137 | 1.30E-08 | 34 | TROVE2   | Immune-B cells |
| 6.68E-15 | 0.27024224 | 0.339 | 0.135 | 2.25E-10 | 34 | HNRNPAB  | Immune-B cells |
| 3.93E-12 | 0.27024222 | 0.588 | 0.311 | 1.32E-07 | 34 | SELM     | Immune-B cells |
| 4.85E-11 | 0.27018945 | 0.774 | 0.491 | 1.63E-06 | 34 | MRPL33   | Immune-B cells |
| 9.69E-12 | 0.27005327 | 0.384 | 0.184 | 3.26E-07 | 34 | LAMTOR1  | Immune-B cells |
| 4.03E-09 | 0.26981985 | 0.356 | 0.181 | 0.00014  | 34 | PSMB5    | Immune-B cells |
| 3.34E-13 | 0.26944125 | 0.48  | 0.237 | 1.13E-08 | 34 | NDUFB5   | Immune-B cells |
| 9.21E-14 | 0.26851505 | 0.401 | 0.179 | 3.10E-09 | 34 | XRCC6    | Immune-B cells |
| 4.74E-12 | 0.26845402 | 0.548 | 0.284 | 1.60E-07 | 34 | COX7A2L  | Immune-B cells |
| 1.08E-28 | 0.26843474 | 0.294 | 0.072 | 3.63E-24 | 34 | PPP1R15B | Immune-B cells |
| 1.47E-17 | 0.26733382 | 0.277 | 0.091 | 4.95E-13 | 34 | MRPL4    | Immune-B cells |
| 3.81E-10 | 0.26731551 | 0.486 | 0.26  | 1.28E-05 | 34 | SMS      | Immune-B cells |
| 3.20E-15 | 0.26693261 | 1     | 0.946 | 1.08E-10 | 34 | RPL41    | Immune-B cells |
| 1.20E-13 | 0.26672796 | 0.35  | 0.148 | 4.06E-09 | 34 | DECR1    | Immune-B cells |
| 2.96E-17 | 0.26655    | 0.322 | 0.116 | 9.96E-13 | 34 | POLR2E   | Immune-B cells |
| 8.28E-15 | 0.26636785 | 0.277 | 0.1   | 2.79E-10 | 34 | SMCO4    | Immune-B cells |

|          |            |       |       |          |    |          |                |
|----------|------------|-------|-------|----------|----|----------|----------------|
| 4.44E-14 | 0.26626561 | 0.288 | 0.111 | 1.49E-09 | 34 | LSM1     | Immune-B cells |
| 3.81E-14 | 0.26574281 | 0.627 | 0.319 | 1.28E-09 | 34 | C12orf75 | Immune-B cells |
| 3.56E-12 | 0.2652304  | 0.418 | 0.201 | 1.20E-07 | 34 | ATP6V1E1 | Immune-B cells |
| 1.28E-14 | 0.26503985 | 0.384 | 0.162 | 4.33E-10 | 34 | CFI      | Immune-B cells |
| 8.97E-15 | 0.26483733 | 0.452 | 0.206 | 3.02E-10 | 34 | UQCRC1   | Immune-B cells |
| 4.50E-15 | 0.26453532 | 0.751 | 0.396 | 1.52E-10 | 34 | S100A13  | Immune-B cells |
| 1.01E-22 | 0.26429133 | 0.305 | 0.087 | 3.39E-18 | 34 | EMX1     | Immune-B cells |
| 5.12E-12 | 0.26415076 | 0.548 | 0.291 | 1.72E-07 | 34 | GHITM    | Immune-B cells |
| 1.30E-11 | 0.26405441 | 0.356 | 0.162 | 4.38E-07 | 34 | FKBP3    | Immune-B cells |
| 5.44E-14 | 0.2636814  | 0.627 | 0.321 | 1.83E-09 | 34 | TRMT112  | Immune-B cells |
| 4.53E-13 | 0.26356164 | 0.271 | 0.102 | 1.53E-08 | 34 | LGAP1-AS | Immune-B cells |
| 2.17E-14 | 0.26350623 | 0.853 | 0.48  | 7.30E-10 | 34 | CTSD     | Immune-B cells |
| 1.80E-13 | 0.26339133 | 0.299 | 0.118 | 6.07E-09 | 34 | ILF2     | Immune-B cells |
| 1.24E-13 | 0.26322841 | 0.424 | 0.192 | 4.17E-09 | 34 | PCM1     | Immune-B cells |
| 2.14E-11 | 0.26273458 | 0.593 | 0.326 | 7.21E-07 | 34 | ISCU     | Immune-B cells |
| 3.27E-13 | 0.26269248 | 0.384 | 0.174 | 1.10E-08 | 34 | SNRPB    | Immune-B cells |
| 6.59E-15 | 0.26263781 | 0.452 | 0.2   | 2.22E-10 | 34 | BICC1    | Immune-B cells |
| 2.05E-17 | 0.26253191 | 0.537 | 0.237 | 6.92E-13 | 34 | GABARAPL | Immune-B cells |
| 3.05E-17 | 0.26218881 | 0.463 | 0.195 | 1.03E-12 | 34 | CEBPB    | Immune-B cells |
| 5.41E-10 | 0.26200135 | 0.802 | 0.504 | 1.82E-05 | 34 | NACA     | Immune-B cells |
| 5.36E-17 | 0.26188172 | 0.288 | 0.099 | 1.81E-12 | 34 | SLC39A1  | Immune-B cells |
| 1.96E-14 | 0.26173122 | 0.497 | 0.237 | 6.60E-10 | 34 | IMP24-AS | Immune-B cells |
| 3.11E-15 | 0.26159156 | 0.429 | 0.187 | 1.05E-10 | 34 | BLVRB    | Immune-B cells |
| 3.64E-11 | 0.26156181 | 0.299 | 0.129 | 1.23E-06 | 34 | RNMT     | Immune-B cells |
| 7.60E-19 | 0.26143258 | 0.542 | 0.226 | 2.56E-14 | 34 | MECOM    | Immune-B cells |
| 5.72E-12 | 0.26089431 | 0.401 | 0.193 | 1.93E-07 | 34 | PSMB7    | Immune-B cells |
| 2.72E-09 | 0.26068015 | 0.271 | 0.123 | 9.17E-05 | 34 | TCEA3    | Immune-B cells |
| 2.27E-12 | 0.26046883 | 0.373 | 0.168 | 7.63E-08 | 34 | GOLGB1   | Immune-B cells |
| 4.77E-14 | 0.26034516 | 0.266 | 0.096 | 1.61E-09 | 34 | PROM1    | Immune-B cells |
| 1.51E-14 | 0.26029886 | 0.333 | 0.131 | 5.08E-10 | 34 | ITGA2    | Immune-B cells |
| 6.85E-16 | 0.26025607 | 0.299 | 0.108 | 2.31E-11 | 34 | MRPS15   | Immune-B cells |
| 2.58E-09 | 0.25982498 | 0.271 | 0.124 | 8.69E-05 | 34 | PHB2     | Immune-B cells |
| 1.90E-16 | 0.25980025 | 0.311 | 0.111 | 6.42E-12 | 34 | NOP58    | Immune-B cells |
| 2.10E-15 | 0.25967158 | 0.424 | 0.185 | 7.07E-11 | 34 | PNRC2    | Immune-B cells |
| 2.01E-11 | 0.25897695 | 0.508 | 0.263 | 6.76E-07 | 34 | STAT3    | Immune-B cells |
| 1.27E-10 | 0.25874228 | 0.316 | 0.144 | 4.29E-06 | 34 | PCF11    | Immune-B cells |
| 2.39E-17 | 0.25850424 | 0.271 | 0.088 | 8.06E-13 | 34 | PHYH     | Immune-B cells |
| 9.46E-10 | 0.25803569 | 0.254 | 0.111 | 3.19E-05 | 34 | NME1     | Immune-B cells |
| 5.03E-08 | 0.25759556 | 0.288 | 0.143 | 0.00169  | 34 | VPS13C   | Immune-B cells |
| 5.01E-14 | 0.2571015  | 0.254 | 0.091 | 1.69E-09 | 34 | HEBP1    | Immune-B cells |
| 5.41E-13 | 0.25680066 | 0.367 | 0.164 | 1.82E-08 | 34 | CD2AP    | Immune-B cells |
| 1.52E-10 | 0.25672214 | 0.96  | 0.765 | 5.11E-06 | 34 | RPL31    | Immune-B cells |
| 1.08E-12 | 0.25671244 | 0.294 | 0.119 | 3.63E-08 | 34 | PVRL2    | Immune-B cells |
| 5.05E-10 | 0.25639742 | 0.424 | 0.221 | 1.70E-05 | 34 | TMEM219  | Immune-B cells |
| 1.72E-12 | 0.25597659 | 0.266 | 0.103 | 5.78E-08 | 34 | SMIM15   | Immune-B cells |
| 1.06E-23 | 0.25594728 | 0.333 | 0.098 | 3.58E-19 | 34 | KCNJ15   | Immune-B cells |
| 8.66E-13 | 0.25498936 | 0.525 | 0.264 | 2.92E-08 | 34 | C6orf62  | Immune-B cells |
| 8.64E-15 | 0.25467475 | 0.299 | 0.113 | 2.91E-10 | 34 | PMF1     | Immune-B cells |

|           |            |       |       |          |    |          |                |
|-----------|------------|-------|-------|----------|----|----------|----------------|
| 1.01E-13  | 0.25466359 | 0.39  | 0.172 | 3.39E-09 | 34 | PSMD8    | Immune-B cells |
| 1.00E-10  | 0.25407444 | 0.746 | 0.441 | 3.38E-06 | 34 | MYL12A   | Immune-B cells |
| 9.31E-19  | 0.25406268 | 0.311 | 0.103 | 3.14E-14 | 34 | SLC25A29 | Immune-B cells |
| 2.24E-15  | 0.25394707 | 0.271 | 0.095 | 7.55E-11 | 34 | EIF1AY   | Immune-B cells |
| 1.02E-09  | 0.2538817  | 0.362 | 0.184 | 3.45E-05 | 34 | LSM4     | Immune-B cells |
| 4.61E-12  | 0.25373451 | 0.706 | 0.395 | 1.55E-07 | 34 | HMGN3    | Immune-B cells |
| 3.94E-10  | 0.25318228 | 0.757 | 0.458 | 1.33E-05 | 34 | OAZ1     | Immune-B cells |
| 2.85E-09  | 0.25250256 | 0.441 | 0.24  | 9.61E-05 | 34 | HIGD2A   | Immune-B cells |
| 1.43E-10  | 0.25198835 | 0.497 | 0.269 | 4.83E-06 | 34 | COL18A1  | Immune-B cells |
| 3.39E-12  | 0.25169779 | 0.277 | 0.11  | 1.14E-07 | 34 | TPD52L1  | Immune-B cells |
| 2.23E-12  | 0.25051973 | 0.672 | 0.375 | 7.51E-08 | 34 | ATP5H    | Immune-B cells |
| 9.08E-09  | 0.25047792 | 0.379 | 0.204 | 0.00031  | 34 | ARL2     | Immune-B cells |
| 8.06E-08  | 0.25040303 | 0.345 | 0.187 | 0.00272  | 34 | BUD31    | Immune-B cells |
| 8.17E-10  | 0.25018675 | 0.768 | 0.468 | 2.75E-05 | 34 | SUMO2    | Immune-B cells |
| 3.14E-104 | 1.61330551 | 0.934 | 0.101 | 1.06E-99 | 35 | RGS5     | Immune-B cells |
| 6.95E-54  | 1.53334234 | 0.934 | 0.191 | 2.34E-49 | 35 | AQP2     | Immune-B cells |
| 2.32E-36  | 1.52112886 | 0.967 | 0.439 | 7.82E-32 | 35 | ZFP36    | Immune-B cells |
| 4.53E-45  | 1.51754354 | 0.885 | 0.222 | 1.53E-40 | 35 | SOCS3    | Immune-B cells |
| 8.04E-39  | 1.50428944 | 1     | 0.527 | 2.71E-34 | 35 | EGR1     | Immune-B cells |
| 1.05E-39  | 1.47391387 | 0.639 | 0.119 | 3.53E-35 | 35 | CCL2     | Immune-B cells |
| 2.29E-73  | 1.41067379 | 0.607 | 0.059 | 7.73E-69 | 35 | C11orf96 | Immune-B cells |
| 1.86E-53  | 1.38789224 | 0.754 | 0.122 | 6.28E-49 | 35 | CXCL2    | Immune-B cells |
| 2.26E-47  | 1.37677365 | 0.869 | 0.198 | 7.62E-43 | 35 | KLF10    | Immune-B cells |
| 5.39E-28  | 1.22980007 | 0.967 | 0.557 | 1.82E-23 | 35 | JUND     | Immune-B cells |
| 8.40E-29  | 1.21975283 | 0.869 | 0.313 | 2.83E-24 | 35 | BTG2     | Immune-B cells |
| 9.27E-52  | 1.21315595 | 0.77  | 0.132 | 3.12E-47 | 35 | PFKFB3   | Immune-B cells |
| 8.74E-36  | 1.20319338 | 0.803 | 0.194 | 2.94E-31 | 35 | C1orf56  | Immune-B cells |
| 2.60E-35  | 1.19383816 | 0.967 | 0.316 | 8.77E-31 | 35 | ATF3     | Immune-B cells |
| 1.95E-30  | 1.19169177 | 1     | 0.677 | 6.57E-26 | 35 | FOS      | Immune-B cells |
| 2.37E-34  | 1.15588185 | 0.885 | 0.269 | 7.99E-30 | 35 | MIDN     | Immune-B cells |
| 8.76E-38  | 1.1550784  | 0.803 | 0.178 | 2.95E-33 | 35 | AQP3     | Immune-B cells |
| 4.44E-27  | 1.12854526 | 0.934 | 0.426 | 1.49E-22 | 35 | FOSB     | Immune-B cells |
| 4.73E-63  | 1.0329803  | 0.541 | 0.054 | 1.59E-58 | 35 | APOLD1   | Immune-B cells |
| 9.13E-40  | 1.02692481 | 0.574 | 0.092 | 3.08E-35 | 35 | PAPPA    | Immune-B cells |
| 1.03E-25  | 1.00064355 | 0.902 | 0.354 | 3.46E-21 | 35 | MCL1     | Immune-B cells |
| 3.76E-21  | 0.99752307 | 0.787 | 0.296 | 1.27E-16 | 35 | FOSL2    | Immune-B cells |
| 8.88E-28  | 0.98673054 | 0.934 | 0.337 | 2.99E-23 | 35 | CTNNB1   | Immune-B cells |
| 3.96E-26  | 0.98542718 | 0.721 | 0.207 | 1.33E-21 | 35 | IRF2BPL  | Immune-B cells |
| 4.82E-25  | 0.97910817 | 0.902 | 0.345 | 1.62E-20 | 35 | YBX3     | Immune-B cells |
| 4.28E-26  | 0.97035211 | 0.869 | 0.303 | 1.44E-21 | 35 | TIMP3    | Immune-B cells |
| 2.46E-24  | 0.96049472 | 0.967 | 0.464 | 8.27E-20 | 35 | JUNB     | Immune-B cells |
| 2.98E-38  | 0.96022877 | 0.918 | 0.226 | 1.01E-33 | 35 | UMOD     | Immune-B cells |
| 2.56E-46  | 0.94782005 | 0.426 | 0.045 | 8.62E-42 | 35 | RBP7     | Immune-B cells |
| 0         | 0.9443207  | 0.328 | 0.003 | 0        | 35 | CCL8     | Immune-B cells |
| 8.20E-29  | 0.94090768 | 0.459 | 0.081 | 2.76E-24 | 35 | SLC25A25 | Immune-B cells |
| 7.09E-40  | 0.92751496 | 0.525 | 0.077 | 2.39E-35 | 35 | ALAS1    | Immune-B cells |
| 1.09E-27  | 0.92315445 | 0.639 | 0.151 | 3.67E-23 | 35 | ADAMTS1  | Immune-B cells |
| 3.22E-25  | 0.90608256 | 0.754 | 0.215 | 1.09E-20 | 35 | CDC42SE1 | Immune-B cells |

|          |            |       |       |          |    |          |                |
|----------|------------|-------|-------|----------|----|----------|----------------|
| 1.93E-21 | 0.90092517 | 0.541 | 0.134 | 6.49E-17 | 35 | TM4SF1   | Immune-B cells |
| 2.42E-18 | 0.89095695 | 0.787 | 0.313 | 8.17E-14 | 35 | NFKBIZ   | Immune-B cells |
| 8.86E-22 | 0.86799196 | 0.639 | 0.185 | 2.98E-17 | 35 | CYR61    | Immune-B cells |
| 5.55E-21 | 0.86735372 | 1     | 0.602 | 1.87E-16 | 35 | JUN      | Immune-B cells |
| 8.28E-20 | 0.85488874 | 0.574 | 0.158 | 2.79E-15 | 35 | EMP1     | Immune-B cells |
| 3.26E-20 | 0.84991228 | 0.934 | 0.434 | 1.10E-15 | 35 | IER2     | Immune-B cells |
| 9.72E-17 | 0.84811152 | 0.803 | 0.358 | 3.27E-12 | 35 | CEBPD    | Immune-B cells |
| 9.52E-24 | 0.84710544 | 0.492 | 0.104 | 3.21E-19 | 35 | PHLDA1   | Immune-B cells |
| 2.38E-61 | 0.84489213 | 0.41  | 0.032 | 8.02E-57 | 35 | ENPP2    | Immune-B cells |
| 6.17E-18 | 0.81105169 | 0.721 | 0.254 | 2.08E-13 | 35 | WTAP     | Immune-B cells |
| 5.60E-23 | 0.80759568 | 0.672 | 0.191 | 1.89E-18 | 35 | NAMPT    | Immune-B cells |
| 4.50E-30 | 0.79091509 | 0.869 | 0.225 | 1.52E-25 | 35 | SLC12A1  | Immune-B cells |
| 7.86E-17 | 0.78852742 | 0.656 | 0.225 | 2.65E-12 | 35 | BHLHE40  | Immune-B cells |
| 4.36E-38 | 0.78475192 | 0.443 | 0.056 | 1.47E-33 | 35 | FN1      | Immune-B cells |
| 9.33E-19 | 0.78456019 | 0.623 | 0.19  | 3.14E-14 | 35 | B4GALT1  | Immune-B cells |
| 4.43E-17 | 0.78028459 | 1     | 0.646 | 1.49E-12 | 35 | HSPA1B   | Immune-B cells |
| 1.66E-26 | 0.77380518 | 0.836 | 0.239 | 5.58E-22 | 35 | FXYP4    | Immune-B cells |
| 1.91E-16 | 0.74923019 | 0.934 | 0.565 | 6.42E-12 | 35 | DUSP1    | Immune-B cells |
| 1.97E-19 | 0.74613658 | 0.59  | 0.166 | 6.63E-15 | 35 | CYFIP2   | Immune-B cells |
| 1.10E-18 | 0.74494521 | 0.918 | 0.446 | 3.72E-14 | 35 | HES1     | Immune-B cells |
| 3.29E-21 | 0.73286325 | 0.426 | 0.087 | 1.11E-16 | 35 | PDGFA    | Immune-B cells |
| 2.12E-19 | 0.72811001 | 0.721 | 0.235 | 7.16E-15 | 35 | AMFR     | Immune-B cells |
| 7.21E-27 | 0.72633863 | 0.393 | 0.063 | 2.43E-22 | 35 | MYC      | Immune-B cells |
| 2.84E-15 | 0.70977745 | 0.803 | 0.335 | 9.58E-11 | 35 | CCNL1    | Immune-B cells |
| 1.66E-64 | 0.70874827 | 0.361 | 0.024 | 5.58E-60 | 35 | EGR3     | Immune-B cells |
| 8.40E-12 | 0.70456209 | 0.803 | 0.432 | 2.83E-07 | 35 | SET      | Immune-B cells |
| 1.51E-15 | 0.70420032 | 0.393 | 0.099 | 5.09E-11 | 35 | CSRNP1   | Immune-B cells |
| 3.39E-14 | 0.70190707 | 0.984 | 0.643 | 1.14E-09 | 35 | MT2A     | Immune-B cells |
| 2.14E-18 | 0.69452245 | 0.557 | 0.157 | 7.21E-14 | 35 | IRF1     | Immune-B cells |
| 2.44E-41 | 0.68790354 | 0.344 | 0.034 | 8.23E-37 | 35 | EGR2     | Immune-B cells |
| 8.61E-57 | 0.68761345 | 0.361 | 0.027 | 2.90E-52 | 35 | KLHL23   | Immune-B cells |
| 1.05E-22 | 0.67962729 | 0.541 | 0.123 | 3.53E-18 | 35 | ST6GAL1  | Immune-B cells |
| 3.89E-15 | 0.67511105 | 0.951 | 0.535 | 1.31E-10 | 35 | KLF6     | Immune-B cells |
| 9.48E-15 | 0.67117498 | 0.934 | 0.511 | 3.20E-10 | 35 | RHOB     | Immune-B cells |
| 1.26E-17 | 0.6706439  | 0.328 | 0.064 | 4.24E-13 | 35 | ARL5B    | Immune-B cells |
| 7.21E-21 | 0.6628532  | 0.574 | 0.146 | 2.43E-16 | 35 | MT1M     | Immune-B cells |
| 7.22E-14 | 0.65187646 | 0.672 | 0.262 | 2.43E-09 | 35 | NDRG1    | Immune-B cells |
| 1.47E-13 | 0.64607638 | 0.951 | 0.645 | 4.96E-09 | 35 | ACTG1    | Immune-B cells |
| 2.66E-13 | 0.63896359 | 0.984 | 0.609 | 8.95E-09 | 35 | HSPA1A   | Immune-B cells |
| 1.30E-15 | 0.63710465 | 0.426 | 0.11  | 4.40E-11 | 35 | MAFF     | Immune-B cells |
| 9.84E-15 | 0.63578874 | 0.59  | 0.199 | 3.32E-10 | 35 | TPM4     | Immune-B cells |
| 2.97E-13 | 0.6347634  | 0.77  | 0.315 | 9.99E-09 | 35 | ELF3     | Immune-B cells |
| 1.08E-12 | 0.6339363  | 0.656 | 0.262 | 3.64E-08 | 35 | NR2F2    | Immune-B cells |
| 3.03E-17 | 0.6312058  | 0.459 | 0.116 | 1.02E-12 | 35 | PRKAG2   | Immune-B cells |
| 1.16E-45 | 0.62798252 | 0.328 | 0.028 | 3.91E-41 | 35 | CRISPLD2 | Immune-B cells |
| 2.80E-12 | 0.62381775 | 0.918 | 0.54  | 9.43E-08 | 35 | NGFRAP1  | Immune-B cells |
| 2.37E-15 | 0.62270874 | 0.557 | 0.17  | 7.99E-11 | 35 | SOX9     | Immune-B cells |
| 1.48E-17 | 0.61632734 | 0.377 | 0.079 | 4.99E-13 | 35 | RGCC     | Immune-B cells |

|          |            |       |       |          |    |          |                |
|----------|------------|-------|-------|----------|----|----------|----------------|
| 6.34E-11 | 0.61259108 | 0.459 | 0.162 | 2.14E-06 | 35 | H1FO     | Immune-B cells |
| 1.71E-16 | 0.61186639 | 0.459 | 0.119 | 5.76E-12 | 35 | PNP      | Immune-B cells |
| 1.43E-13 | 0.61175402 | 0.59  | 0.213 | 4.82E-09 | 35 | MYH9     | Immune-B cells |
| 6.26E-14 | 0.60939538 | 0.475 | 0.143 | 2.11E-09 | 35 | HSPA2    | Immune-B cells |
| 7.28E-12 | 0.60641634 | 0.525 | 0.191 | 2.45E-07 | 35 | TMED4    | Immune-B cells |
| 3.29E-15 | 0.60384231 | 0.426 | 0.111 | 1.11E-10 | 35 | TWSG1    | Immune-B cells |
| 4.41E-13 | 0.60357187 | 0.754 | 0.328 | 1.48E-08 | 35 | DDX3X    | Immune-B cells |
| 9.29E-40 | 0.60332595 | 0.344 | 0.034 | 3.13E-35 | 35 | MT1A     | Immune-B cells |
| 6.43E-12 | 0.59769764 | 0.459 | 0.151 | 2.17E-07 | 35 | TACC1    | Immune-B cells |
| 2.38E-11 | 0.59675895 | 0.377 | 0.112 | 8.02E-07 | 35 | MOB1B    | Immune-B cells |
| 8.76E-21 | 0.59522162 | 0.459 | 0.099 | 2.95E-16 | 35 | KCNJ15   | Immune-B cells |
| 6.35E-15 | 0.59407222 | 0.328 | 0.073 | 2.14E-10 | 35 | SOCS2    | Immune-B cells |
| 1.35E-22 | 0.59193233 | 0.262 | 0.034 | 4.55E-18 | 35 | FRZB     | Immune-B cells |
| 2.29E-77 | 0.58545221 | 0.295 | 0.014 | 7.72E-73 | 35 | SOX17    | Immune-B cells |
| 8.25E-16 | 0.58496053 | 0.377 | 0.087 | 2.78E-11 | 35 | SGPP1    | Immune-B cells |
| 2.70E-13 | 0.58202456 | 0.984 | 0.657 | 9.11E-09 | 35 | H3F3B    | Immune-B cells |
| 8.01E-10 | 0.58174923 | 0.705 | 0.35  | 2.70E-05 | 35 | PDK4     | Immune-B cells |
| 1.35E-12 | 0.57979656 | 0.377 | 0.103 | 4.55E-08 | 35 | KDM6B    | Immune-B cells |
| 5.42E-13 | 0.57800241 | 0.689 | 0.28  | 1.83E-08 | 35 | LMNA     | Immune-B cells |
| 1.31E-10 | 0.57671104 | 0.705 | 0.324 | 4.40E-06 | 35 | SOD2     | Immune-B cells |
| 1.33E-23 | 0.57073503 | 0.262 | 0.033 | 4.49E-19 | 35 | LTBP1    | Immune-B cells |
| 5.02E-20 | 0.56922501 | 0.361 | 0.065 | 1.69E-15 | 35 | SCNN1G   | Immune-B cells |
| 8.57E-12 | 0.56688097 | 0.82  | 0.38  | 2.89E-07 | 35 | GADD45B  | Immune-B cells |
| 2.00E-11 | 0.56681483 | 0.361 | 0.106 | 6.73E-07 | 35 | CCNG2    | Immune-B cells |
| 4.90E-26 | 0.56229242 | 0.328 | 0.045 | 1.65E-21 | 35 | CPE      | Immune-B cells |
| 4.58E-13 | 0.5546819  | 0.344 | 0.087 | 1.54E-08 | 35 | TIPARP   | Immune-B cells |
| 2.89E-15 | 0.55457984 | 0.41  | 0.1   | 9.72E-11 | 35 | TCF4     | Immune-B cells |
| 1.93E-21 | 0.55405186 | 0.328 | 0.053 | 6.52E-17 | 35 | IGFBP3   | Immune-B cells |
| 1.08E-17 | 0.55228447 | 0.361 | 0.073 | 3.64E-13 | 35 | FAM84A   | Immune-B cells |
| 6.69E-13 | 0.54932396 | 0.459 | 0.143 | 2.25E-08 | 35 | AFF1     | Immune-B cells |
| 3.79E-13 | 0.54882318 | 0.41  | 0.115 | 1.28E-08 | 35 | RDH10    | Immune-B cells |
| 1.99E-14 | 0.54532216 | 0.59  | 0.199 | 6.72E-10 | 35 | KLF9     | Immune-B cells |
| 4.11E-06 | 0.54148921 | 0.557 | 0.308 | 0.13843  | 35 | INC00657 | Immune-B cells |
| 4.98E-12 | 0.54114982 | 0.574 | 0.202 | 1.68E-07 | 35 | RPS4Y1   | Immune-B cells |
| 1.21E-11 | 0.53779121 | 0.311 | 0.08  | 4.06E-07 | 35 | P5-862P8 | Immune-B cells |
| 3.56E-15 | 0.53577516 | 0.984 | 0.743 | 1.20E-10 | 35 | ATP1B1   | Immune-B cells |
| 2.20E-24 | 0.53283528 | 0.557 | 0.115 | 7.42E-20 | 35 | SPARCL1  | Immune-B cells |
| 2.14E-20 | 0.53229793 | 0.541 | 0.127 | 7.20E-16 | 35 | AQP1     | Immune-B cells |
| 9.03E-12 | 0.5319419  | 0.967 | 0.546 | 3.04E-07 | 35 | HNRNPH1  | Immune-B cells |
| 8.78E-11 | 0.52998977 | 0.541 | 0.208 | 2.96E-06 | 35 | MAL2     | Immune-B cells |
| 5.38E-17 | 0.52891261 | 0.295 | 0.053 | 1.81E-12 | 35 | CXCL3    | Immune-B cells |
| 2.65E-13 | 0.52865291 | 0.475 | 0.138 | 8.94E-09 | 35 | GATA3    | Immune-B cells |
| 7.40E-10 | 0.52705369 | 0.328 | 0.1   | 2.49E-05 | 35 | SMCO4    | Immune-B cells |
| 8.35E-11 | 0.52417807 | 0.328 | 0.092 | 2.81E-06 | 35 | AMOTL2   | Immune-B cells |
| 3.60E-16 | 0.51865111 | 0.557 | 0.153 | 1.21E-11 | 35 | ADGRF5   | Immune-B cells |
| 2.21E-19 | 0.51447063 | 0.279 | 0.044 | 7.45E-15 | 35 | CYBRD1   | Immune-B cells |
| 2.20E-08 | 0.51143235 | 0.508 | 0.219 | 0.00074  | 35 | RBPMS    | Immune-B cells |
| 3.38E-10 | 0.50974431 | 0.443 | 0.157 | 1.14E-05 | 35 | NEDD4L   | Immune-B cells |

|           |            |       |       |          |    |          |                |
|-----------|------------|-------|-------|----------|----|----------|----------------|
| 2.67E-17  | 0.50876538 | 0.541 | 0.142 | 9.01E-13 | 35 | SRGN     | Immune-B cells |
| 1.95E-09  | 0.50767005 | 0.869 | 0.544 | 6.57E-05 | 35 | ZFP36L1  | Immune-B cells |
| 1.56E-08  | 0.50543823 | 0.41  | 0.155 | 0.00053  | 35 | 11-553L6 | Immune-B cells |
| 5.24E-09  | 0.50255753 | 0.525 | 0.22  | 0.00018  | 35 | TSPYL1   | Immune-B cells |
| 2.30E-11  | 0.50041693 | 0.295 | 0.075 | 7.76E-07 | 35 | DDX3Y    | Immune-B cells |
| 9.76E-08  | 0.49890384 | 0.459 | 0.2   | 0.00329  | 35 | MAT2A    | Immune-B cells |
| 4.52E-07  | 0.49657698 | 0.607 | 0.317 | 0.01522  | 35 | CAMTA1   | Immune-B cells |
| 5.32E-11  | 0.49516873 | 0.393 | 0.124 | 1.79E-06 | 35 | MED13L   | Immune-B cells |
| 4.12E-13  | 0.49417957 | 0.41  | 0.115 | 1.39E-08 | 35 | THSD7A   | Immune-B cells |
| 2.27E-13  | 0.49393951 | 0.361 | 0.091 | 7.65E-09 | 35 | PMAIP1   | Immune-B cells |
| 1.35E-09  | 0.49341621 | 0.344 | 0.107 | 4.56E-05 | 35 | PLEKHA2  | Immune-B cells |
| 7.42E-21  | 0.49298822 | 0.311 | 0.049 | 2.50E-16 | 35 | CD93     | Immune-B cells |
| 6.06E-09  | 0.48558212 | 0.787 | 0.405 | 0.0002   | 35 | TSC22D1  | Immune-B cells |
| 1.47E-09  | 0.48267267 | 0.443 | 0.164 | 4.95E-05 | 35 | SYNCRIP  | Immune-B cells |
| 2.66E-09  | 0.48107811 | 0.262 | 0.069 | 8.95E-05 | 35 | PHKG1    | Immune-B cells |
| 2.73E-11  | 0.48094299 | 0.82  | 0.388 | 9.19E-07 | 35 | SRSF3    | Immune-B cells |
| 1.08E-07  | 0.48079475 | 0.377 | 0.145 | 0.00364  | 35 | RBM5     | Immune-B cells |
| 1.68E-10  | 0.475981   | 0.738 | 0.344 | 5.65E-06 | 35 | UBE2D3   | Immune-B cells |
| 7.54E-09  | 0.47397395 | 0.361 | 0.124 | 0.00025  | 35 | CSNK1E   | Immune-B cells |
| 2.70E-07  | 0.47368216 | 0.377 | 0.146 | 0.0091   | 35 | RCAN1    | Immune-B cells |
| 1.09E-15  | 0.47323958 | 0.311 | 0.062 | 3.69E-11 | 35 | SERPINE2 | Immune-B cells |
| 5.09E-09  | 0.4729164  | 0.279 | 0.079 | 0.00017  | 35 | ARRDC4   | Immune-B cells |
| 1.90E-07  | 0.47204368 | 0.344 | 0.13  | 0.00639  | 35 | TOB2     | Immune-B cells |
| 2.63E-17  | 0.47197784 | 0.377 | 0.079 | 8.86E-13 | 35 | CAV1     | Immune-B cells |
| 1.00E-10  | 0.4717     | 0.672 | 0.283 | 3.39E-06 | 35 | NUDT4    | Immune-B cells |
| 3.10E-07  | 0.4689827  | 0.557 | 0.277 | 0.01044  | 35 | HNRNPD   | Immune-B cells |
| 5.05E-10  | 0.46766581 | 0.41  | 0.138 | 1.70E-05 | 35 | STOM     | Immune-B cells |
| 1.58E-31  | 0.46675124 | 0.738 | 0.152 | 5.31E-27 | 35 | STC1     | Immune-B cells |
| 3.39E-08  | 0.46611623 | 0.311 | 0.103 | 0.00114  | 35 | TNFRSF1A | Immune-B cells |
| 3.94E-13  | 0.46561448 | 0.262 | 0.053 | 1.33E-08 | 35 | GATA2    | Immune-B cells |
| 1.07E-07  | 0.46459823 | 0.475 | 0.209 | 0.0036   | 35 | METTL9   | Immune-B cells |
| 3.53E-07  | 0.4638881  | 0.492 | 0.224 | 0.0119   | 35 | MDM4     | Immune-B cells |
| 4.04E-08  | 0.46182482 | 0.639 | 0.312 | 0.00136  | 35 | NFKBIA   | Immune-B cells |
| 2.28E-06  | 0.45905372 | 0.393 | 0.175 | 0.07677  | 35 | SMARCA2  | Immune-B cells |
| 1.13E-08  | 0.4588276  | 0.492 | 0.19  | 0.00038  | 35 | GATM     | Immune-B cells |
| 9.55E-07  | 0.45869828 | 0.459 | 0.213 | 0.03217  | 35 | Mar-19   | Immune-B cells |
| 7.74E-08  | 0.4534951  | 0.492 | 0.217 | 0.00261  | 35 | JADE1    | Immune-B cells |
| 1.16E-06  | 0.44950405 | 0.492 | 0.228 | 0.03918  | 35 | NR4A1    | Immune-B cells |
| 5.77E-12  | 0.44911185 | 0.311 | 0.078 | 1.94E-07 | 35 | ERF      | Immune-B cells |
| 8.21E-11  | 0.44707817 | 0.639 | 0.253 | 2.77E-06 | 35 | SCIN     | Immune-B cells |
| 9.67E-10  | 0.44700103 | 0.344 | 0.107 | 3.26E-05 | 35 | C-444N24 | Immune-B cells |
| 9.16E-09  | 0.44580606 | 0.656 | 0.31  | 0.00031  | 35 | TRA2A    | Immune-B cells |
| 1.22E-14  | 0.44502493 | 1     | 0.922 | 4.11E-10 | 35 | EEF1A1   | Immune-B cells |
| 3.73E-12  | 0.44419934 | 0.639 | 0.232 | 1.26E-07 | 35 | CA2      | Immune-B cells |
| 1.68E-07  | 0.44068878 | 0.426 | 0.177 | 0.00566  | 35 | Sep-19   | Immune-B cells |
| 3.66E-11  | 0.44048081 | 0.508 | 0.182 | 1.23E-06 | 35 | C5orf24  | Immune-B cells |
| 0.0002022 | 0.44019804 | 0.311 | 0.154 | 1        | 35 | RNF5     | Immune-B cells |
| 2.26E-09  | 0.44000711 | 0.426 | 0.156 | 7.60E-05 | 35 | CGGBP1   | Immune-B cells |

|          |            |       |       |          |    |          |                |
|----------|------------|-------|-------|----------|----|----------|----------------|
| 3.68E-08 | 0.4399503  | 0.836 | 0.503 | 0.00124  | 35 | YBX1     | Immune-B cells |
| 5.91E-07 | 0.43927224 | 0.311 | 0.113 | 0.01992  | 35 | TRIB1    | Immune-B cells |
| 1.07E-10 | 0.43765895 | 0.262 | 0.063 | 3.60E-06 | 35 | RNF150   | Immune-B cells |
| 4.91E-07 | 0.43456313 | 0.311 | 0.114 | 0.01655  | 35 | PPM1A    | Immune-B cells |
| 3.69E-12 | 0.43417471 | 0.262 | 0.057 | 1.24E-07 | 35 | NOTCH3   | Immune-B cells |
| 3.25E-09 | 0.43366111 | 0.623 | 0.275 | 0.00011  | 35 | PTP4A2   | Immune-B cells |
| 1.93E-07 | 0.43308154 | 0.59  | 0.284 | 0.00649  | 35 | ASAH1    | Immune-B cells |
| 4.39E-09 | 0.42967854 | 0.836 | 0.411 | 0.00015  | 35 | CYB5A    | Immune-B cells |
| 2.94E-09 | 0.42966955 | 0.59  | 0.252 | 9.92E-05 | 35 | RBM47    | Immune-B cells |
| 2.15E-15 | 0.42950466 | 0.623 | 0.188 | 7.25E-11 | 35 | SPARC    | Immune-B cells |
| 3.42E-08 | 0.428379   | 0.443 | 0.178 | 0.00115  | 35 | PAM      | Immune-B cells |
| 1.08E-13 | 0.42820433 | 0.295 | 0.064 | 3.65E-09 | 35 | ABL2     | Immune-B cells |
| 5.52E-07 | 0.4280134  | 0.574 | 0.278 | 0.01859  | 35 | AIF1L    | Immune-B cells |
| 2.82E-07 | 0.42789182 | 0.508 | 0.232 | 0.0095   | 35 | AMD1     | Immune-B cells |
| 1.13E-06 | 0.42703994 | 0.77  | 0.44  | 0.03818  | 35 | NPM1     | Immune-B cells |
| 7.97E-08 | 0.42539711 | 0.754 | 0.418 | 0.00268  | 35 | PPP1CB   | Immune-B cells |
| 7.84E-10 | 0.42526858 | 0.295 | 0.081 | 2.64E-05 | 35 | ARG2     | Immune-B cells |
| 2.80E-09 | 0.4240366  | 0.754 | 0.382 | 9.42E-05 | 35 | ZFAND5   | Immune-B cells |
| 6.34E-07 | 0.42260575 | 0.492 | 0.23  | 0.02137  | 35 | HEBP2    | Immune-B cells |
| 4.68E-07 | 0.42229057 | 0.262 | 0.085 | 0.01577  | 35 | TGFBR1   | Immune-B cells |
| 4.52E-07 | 0.4199365  | 0.328 | 0.122 | 0.01524  | 35 | CRIP1    | Immune-B cells |
| 1.23E-08 | 0.41839721 | 0.311 | 0.098 | 0.00041  | 35 | IRS2     | Immune-B cells |
| 1.34E-10 | 0.41797264 | 0.41  | 0.131 | 4.50E-06 | 35 | MYO1B    | Immune-B cells |
| 1.84E-08 | 0.41749123 | 0.262 | 0.075 | 0.00062  | 35 | SOCS1    | Immune-B cells |
| 2.11E-07 | 0.41692346 | 0.41  | 0.166 | 0.00711  | 35 | RAB21    | Immune-B cells |
| 7.09E-07 | 0.41546441 | 0.59  | 0.309 | 0.02389  | 35 | SRSF2    | Immune-B cells |
| 1.55E-08 | 0.41196679 | 0.459 | 0.18  | 0.00052  | 35 | CDKN1A   | Immune-B cells |
| 9.20E-10 | 0.41186613 | 0.344 | 0.104 | 3.10E-05 | 35 | LBH      | Immune-B cells |
| 2.93E-14 | 0.40995723 | 0.328 | 0.074 | 9.87E-10 | 35 | TLE1     | Immune-B cells |
| 4.95E-07 | 0.40917965 | 0.508 | 0.227 | 0.01667  | 35 | MECOM    | Immune-B cells |
| 2.79E-08 | 0.40883157 | 0.459 | 0.179 | 0.00094  | 35 | FKBP5    | Immune-B cells |
| 1.00E-07 | 0.4080368  | 0.377 | 0.144 | 0.00338  | 35 | TNS1     | Immune-B cells |
| 3.23E-07 | 0.40789443 | 0.59  | 0.283 | 0.01089  | 35 | IVNS1ABP | Immune-B cells |
| 7.08E-08 | 0.40693242 | 0.475 | 0.198 | 0.00239  | 35 | INSR     | Immune-B cells |
| 6.06E-07 | 0.40616078 | 0.475 | 0.217 | 0.02041  | 35 | GSN      | Immune-B cells |
| 7.76E-12 | 0.40596335 | 1     | 0.809 | 2.62E-07 | 35 | TMSB4X   | Immune-B cells |
| 5.21E-09 | 0.40398313 | 0.41  | 0.142 | 0.00018  | 35 | EPAS1    | Immune-B cells |
| 1.96E-06 | 0.40241415 | 0.492 | 0.241 | 0.06608  | 35 | TCEB1    | Immune-B cells |
| 1.52E-11 | 0.40227001 | 0.393 | 0.114 | 5.11E-07 | 35 | JAG1     | Immune-B cells |
| 4.74E-07 | 0.40117606 | 0.328 | 0.121 | 0.01595  | 35 | ABHD2    | Immune-B cells |
| 1.62E-07 | 0.40105503 | 0.639 | 0.321 | 0.00547  | 35 | PRKAR1A  | Immune-B cells |
| 1.92E-06 | 0.40033866 | 0.279 | 0.101 | 0.0646   | 35 | R4435-2H | Immune-B cells |
| 3.27E-07 | 0.40018835 | 0.443 | 0.189 | 0.01102  | 35 | ARHGAP24 | Immune-B cells |
| 1.77E-06 | 0.39998531 | 0.607 | 0.316 | 0.05973  | 35 | SRP9     | Immune-B cells |
| 2.35E-11 | 0.39924251 | 0.311 | 0.079 | 7.92E-07 | 35 | ANK2     | Immune-B cells |
| 1.50E-13 | 0.39886112 | 0.41  | 0.106 | 5.06E-09 | 35 | A2M      | Immune-B cells |
| 2.50E-06 | 0.39790019 | 0.279 | 0.101 | 0.08419  | 35 | UBE2W    | Immune-B cells |
| 1.15E-07 | 0.39633643 | 0.738 | 0.391 | 0.00389  | 35 | ARL6IP1  | Immune-B cells |

|           |            |       |       |          |    |          |                |
|-----------|------------|-------|-------|----------|----|----------|----------------|
| 0.0005064 | 0.39567575 | 0.295 | 0.147 | 1        | 35 | STK24    | Immune-B cells |
| 1.02E-07  | 0.39520167 | 0.344 | 0.127 | 0.00344  | 35 | CCNDBP1  | Immune-B cells |
| 2.42E-06  | 0.39496705 | 0.803 | 0.509 | 0.08161  | 35 | DDX17    | Immune-B cells |
| 9.55E-08  | 0.39326141 | 0.262 | 0.08  | 0.00322  | 35 | PMEPA1   | Immune-B cells |
| 1.82E-05  | 0.3929045  | 0.279 | 0.111 | 0.61469  | 35 | DCUN1D1  | Immune-B cells |
| 1.48E-05  | 0.39256691 | 0.279 | 0.111 | 0.49764  | 35 | SPPL3    | Immune-B cells |
| 2.37E-08  | 0.39241503 | 0.361 | 0.127 | 0.0008   | 35 | PKD2     | Immune-B cells |
| 2.98E-06  | 0.39178598 | 0.393 | 0.174 | 0.10045  | 35 | GLRX5    | Immune-B cells |
| 8.32E-08  | 0.39042109 | 0.377 | 0.139 | 0.0028   | 35 | PDE1A    | Immune-B cells |
| 1.28E-06  | 0.38891123 | 0.525 | 0.236 | 0.04321  | 35 | APOE     | Immune-B cells |
| 1.35E-07  | 0.3868123  | 0.262 | 0.081 | 0.00454  | 35 | SLC11A2  | Immune-B cells |
| 1.50E-08  | 0.38384004 | 0.393 | 0.139 | 0.0005   | 35 | MYLK     | Immune-B cells |
| 1.99E-06  | 0.38224316 | 0.393 | 0.171 | 0.06691  | 35 | TMEM245  | Immune-B cells |
| 6.10E-06  | 0.38092882 | 0.311 | 0.126 | 0.20549  | 35 | ATP2A2   | Immune-B cells |
| 4.55E-06  | 0.37915799 | 0.262 | 0.096 | 0.15337  | 35 | EIF1AY   | Immune-B cells |
| 3.85E-08  | 0.37729711 | 0.393 | 0.141 | 0.0013   | 35 | SMIM22   | Immune-B cells |
| 5.46E-06  | 0.37593342 | 0.443 | 0.206 | 0.18408  | 35 | NFIB     | Immune-B cells |
| 1.03E-08  | 0.3755882  | 0.59  | 0.263 | 0.00035  | 35 | SF1      | Immune-B cells |
| 2.57E-06  | 0.37545147 | 0.59  | 0.303 | 0.0865   | 35 | Sep-19   | Immune-B cells |
| 2.47E-06  | 0.37510918 | 0.557 | 0.29  | 0.08331  | 35 | EIF4B    | Immune-B cells |
| 3.00E-10  | 0.37450274 | 0.279 | 0.071 | 1.01E-05 | 35 | 11-382A2 | Immune-B cells |
| 1.18E-06  | 0.37310648 | 0.443 | 0.2   | 0.03991  | 35 | MTPN     | Immune-B cells |
| 6.12E-07  | 0.37268964 | 0.639 | 0.306 | 0.02061  | 35 | VIM      | Immune-B cells |
| 7.75E-07  | 0.37259512 | 0.295 | 0.103 | 0.02612  | 35 | NTRK2    | Immune-B cells |
| 5.28E-06  | 0.37205587 | 0.672 | 0.37  | 0.17799  | 35 | CNN3     | Immune-B cells |
| 5.08E-05  | 0.37148369 | 0.59  | 0.338 | 1        | 35 | SLC25A5  | Immune-B cells |
| 1.21E-06  | 0.37116947 | 0.689 | 0.383 | 0.04079  | 35 | ITGB1    | Immune-B cells |
| 1.69E-06  | 0.37062349 | 0.426 | 0.192 | 0.05682  | 35 | LAPTM4B  | Immune-B cells |
| 0.0002385 | 0.37049272 | 0.311 | 0.151 | 1        | 35 | FAM127A  | Immune-B cells |
| 7.33E-06  | 0.36997161 | 0.377 | 0.168 | 0.24704  | 35 | MAPK1IP1 | Immune-B cells |
| 4.33E-07  | 0.36756235 | 0.279 | 0.093 | 0.01459  | 35 | CCNY     | Immune-B cells |
| 5.07E-08  | 0.36667552 | 0.984 | 0.809 | 0.00171  | 35 | ACTB     | Immune-B cells |
| 2.81E-06  | 0.36390433 | 0.311 | 0.12  | 0.09469  | 35 | PTPRF    | Immune-B cells |
| 1.54E-06  | 0.36346814 | 0.262 | 0.091 | 0.05197  | 35 | SAV1     | Immune-B cells |
| 5.43E-24  | 0.36335782 | 0.738 | 0.185 | 1.83E-19 | 35 | MGP      | Immune-B cells |
| 2.95E-06  | 0.36276314 | 0.656 | 0.35  | 0.09955  | 35 | GABARAPL | Immune-B cells |
| 7.01E-10  | 0.36272805 | 0.262 | 0.067 | 2.36E-05 | 35 | MAFK     | Immune-B cells |
| 2.65E-08  | 0.36243774 | 0.459 | 0.177 | 0.00089  | 35 | KLF4     | Immune-B cells |
| 1.87E-27  | 0.36004187 | 0.574 | 0.112 | 6.31E-23 | 35 | TAGLN    | Immune-B cells |
| 9.44E-07  | 0.35980536 | 0.426 | 0.182 | 0.03179  | 35 | CTSH     | Immune-B cells |
| 9.87E-05  | 0.35754306 | 0.344 | 0.168 | 1        | 35 | RAB6A    | Immune-B cells |
| 2.55E-06  | 0.35723322 | 0.393 | 0.172 | 0.08597  | 35 | CAT      | Immune-B cells |
| 1.27E-05  | 0.3567035  | 0.328 | 0.14  | 0.42959  | 35 | VCL      | Immune-B cells |
| 3.67E-06  | 0.35629401 | 0.77  | 0.443 | 0.1235   | 35 | SRSF5    | Immune-B cells |
| 9.37E-05  | 0.3559475  | 0.623 | 0.366 | 1        | 35 | SPINT2   | Immune-B cells |
| 2.30E-05  | 0.35588171 | 0.574 | 0.325 | 0.77388  | 35 | GLS      | Immune-B cells |
| 4.24E-07  | 0.35578406 | 0.279 | 0.093 | 0.0143   | 35 | IER5L    | Immune-B cells |
| 3.95E-07  | 0.35343768 | 0.426 | 0.18  | 0.01332  | 35 | TMEM141  | Immune-B cells |

|           |            |       |       |          |    |          |                |
|-----------|------------|-------|-------|----------|----|----------|----------------|
| 7.08E-07  | 0.3532191  | 0.443 | 0.188 | 0.02387  | 35 | PLS3     | Immune-B cells |
| 4.93E-05  | 0.35316419 | 0.279 | 0.118 | 1        | 35 | KDSR     | Immune-B cells |
| 3.20E-09  | 0.35304602 | 0.328 | 0.1   | 0.00011  | 35 | CMTM4    | Immune-B cells |
| 1.47E-07  | 0.35093766 | 0.295 | 0.098 | 0.00495  | 35 | DAPK1    | Immune-B cells |
| 0.000684  | 0.35071944 | 0.557 | 0.34  | 1        | 35 | SAP18    | Immune-B cells |
| 1.03E-08  | 0.35066057 | 0.475 | 0.176 | 0.00035  | 35 | PTGER3   | Immune-B cells |
| 8.10E-11  | 0.35045825 | 0.279 | 0.068 | 2.73E-06 | 35 | ADAMTS9  | Immune-B cells |
| 4.29E-07  | 0.3503581  | 0.475 | 0.212 | 0.01444  | 35 | YPEL5    | Immune-B cells |
| 0.0002599 | 0.34896768 | 0.344 | 0.173 | 1        | 35 | YWHAG    | Immune-B cells |
| 1.95E-06  | 0.34638518 | 0.377 | 0.158 | 0.0658   | 35 | CAMLG    | Immune-B cells |
| 2.85E-06  | 0.34587079 | 0.492 | 0.241 | 0.09603  | 35 | C7orf73  | Immune-B cells |
| 2.66E-05  | 0.34495408 | 0.475 | 0.248 | 0.89794  | 35 | MPC1     | Immune-B cells |
| 0.0004291 | 0.34440452 | 0.328 | 0.169 | 1        | 35 | LMO7     | Immune-B cells |
| 9.90E-07  | 0.34398247 | 0.262 | 0.085 | 0.03337  | 35 | SH3BP5   | Immune-B cells |
| 3.45E-06  | 0.34395532 | 0.557 | 0.287 | 0.11612  | 35 | MORF4L2  | Immune-B cells |
| 2.04E-06  | 0.34302854 | 0.525 | 0.257 | 0.06865  | 35 | Sep-19   | Immune-B cells |
| 8.20E-08  | 0.34301905 | 0.262 | 0.075 | 0.00276  | 35 | EGF      | Immune-B cells |
| 0.0004875 | 0.34234182 | 0.279 | 0.135 | 1        | 35 | ATP2C1   | Immune-B cells |
| 9.61E-08  | 0.34145333 | 0.328 | 0.113 | 0.00324  | 35 | YPEL2    | Immune-B cells |
| 8.73E-07  | 0.33923534 | 0.311 | 0.114 | 0.0294   | 35 | RAP1B    | Immune-B cells |
| 1.25E-05  | 0.33685974 | 0.279 | 0.109 | 0.42132  | 35 | PTPN12   | Immune-B cells |
| 1.02E-05  | 0.33627935 | 0.311 | 0.128 | 0.34237  | 35 | TINAGL1  | Immune-B cells |
| 3.36E-05  | 0.33614333 | 0.311 | 0.135 | 1        | 35 | PRRC2B   | Immune-B cells |
| 1.67E-05  | 0.33588454 | 0.295 | 0.119 | 0.56211  | 35 | MAN2A1   | Immune-B cells |
| 0.0003307 | 0.33588453 | 0.361 | 0.186 | 1        | 35 | PLSCR1   | Immune-B cells |
| 4.49E-07  | 0.33582381 | 0.443 | 0.188 | 0.01512  | 35 | EIF2S3   | Immune-B cells |
| 4.94E-07  | 0.33529398 | 0.311 | 0.11  | 0.01665  | 35 | FAM171A1 | Immune-B cells |
| 6.22E-06  | 0.33512555 | 0.328 | 0.133 | 0.20949  | 35 | ADD1     | Immune-B cells |
| 3.15E-07  | 0.33469519 | 0.541 | 0.248 | 0.01062  | 35 | ARID5B   | Immune-B cells |
| 4.18E-06  | 0.33439434 | 0.738 | 0.395 | 0.14088  | 35 | PRDX5    | Immune-B cells |
| 1.02E-07  | 0.33389428 | 0.377 | 0.141 | 0.00344  | 35 | PIM3     | Immune-B cells |
| 4.76E-06  | 0.33246328 | 0.525 | 0.262 | 0.16044  | 35 | BRD2     | Immune-B cells |
| 0.0001968 | 0.33192704 | 0.77  | 0.533 | 1        | 35 | APP      | Immune-B cells |
| 1.86E-06  | 0.33144583 | 0.525 | 0.236 | 0.06256  | 35 | HSD11B2  | Immune-B cells |
| 0.0001035 | 0.33143343 | 0.443 | 0.238 | 1        | 35 | ACTR2    | Immune-B cells |
| 1.86E-05  | 0.32952733 | 0.311 | 0.129 | 0.62763  | 35 | ARID1A   | Immune-B cells |
| 9.19E-05  | 0.32924439 | 0.279 | 0.121 | 1        | 35 | MYLIP    | Immune-B cells |
| 1.05E-07  | 0.32871267 | 0.344 | 0.124 | 0.00353  | 35 | VEZF1    | Immune-B cells |
| 2.98E-07  | 0.3284183  | 1     | 0.789 | 0.01005  | 35 | TPT1     | Immune-B cells |
| 4.47E-05  | 0.32618968 | 0.656 | 0.383 | 1        | 35 | NAP1L1   | Immune-B cells |
| 2.26E-05  | 0.32597482 | 0.787 | 0.477 | 0.76067  | 35 | APLP2    | Immune-B cells |
| 4.43E-07  | 0.32551165 | 1     | 0.893 | 0.01494  | 35 | NEAT1    | Immune-B cells |
| 0.0010813 | 0.32497241 | 0.377 | 0.215 | 1        | 35 | HADHB    | Immune-B cells |
| 5.30E-07  | 0.32404796 | 0.344 | 0.129 | 0.01785  | 35 | UTRN     | Immune-B cells |
| 2.50E-06  | 0.32355108 | 0.262 | 0.09  | 0.08409  | 35 | ANKRD28  | Immune-B cells |
| 2.66E-06  | 0.32343376 | 0.361 | 0.148 | 0.0896   | 35 | HIPK3    | Immune-B cells |
| 7.87E-07  | 0.32303897 | 0.803 | 0.448 | 0.0265   | 35 | EIF4A2   | Immune-B cells |
| 1.23E-06  | 0.32277475 | 0.492 | 0.227 | 0.04143  | 35 | RTN3     | Immune-B cells |

|           |            |       |       |          |    |          |                |
|-----------|------------|-------|-------|----------|----|----------|----------------|
| 1.45E-06  | 0.3215252  | 0.803 | 0.482 | 0.04887  | 35 | CDC42    | Immune-B cells |
| 0.0001437 | 0.32065488 | 0.377 | 0.191 | 1        | 35 | TAF7     | Immune-B cells |
| 0.0014528 | 0.31988509 | 0.41  | 0.24  | 1        | 35 | C6orf48  | Immune-B cells |
| 3.08E-06  | 0.31947279 | 0.607 | 0.302 | 0.10378  | 35 | HSPH1    | Immune-B cells |
| 7.68E-05  | 0.31846387 | 0.803 | 0.497 | 1        | 35 | HNRNPA1  | Immune-B cells |
| 2.62E-05  | 0.31836906 | 0.344 | 0.152 | 0.88358  | 35 | WEE1     | Immune-B cells |
| 7.05E-16  | 0.31803162 | 0.344 | 0.071 | 2.38E-11 | 35 | ACTA2    | Immune-B cells |
| 0.0003054 | 0.31799042 | 0.344 | 0.169 | 1        | 35 | KCNJ1    | Immune-B cells |
| 1.79E-09  | 0.31766484 | 0.262 | 0.067 | 6.02E-05 | 35 | BHMT     | Immune-B cells |
| 5.49E-05  | 0.31760113 | 0.492 | 0.264 | 1        | 35 | STAT3    | Immune-B cells |
| 0.0001241 | 0.31756337 | 0.328 | 0.152 | 1        | 35 | KCTD12   | Immune-B cells |
| 0.0001519 | 0.3168101  | 0.82  | 0.552 | 1        | 35 | DDX5     | Immune-B cells |
| 0.0001503 | 0.3163763  | 0.377 | 0.192 | 1        | 35 | GTF2A2   | Immune-B cells |
| 7.12E-06  | 0.31581993 | 0.344 | 0.144 | 0.23984  | 35 | PCF11    | Immune-B cells |
| 2.29E-06  | 0.31487773 | 0.459 | 0.208 | 0.07723  | 35 | IRF2BP2  | Immune-B cells |
| 1.85E-08  | 0.31472379 | 0.492 | 0.192 | 0.00062  | 35 | ID1      | Immune-B cells |
| 0.0003459 | 0.31456458 | 0.344 | 0.179 | 1        | 35 | FGD5-AS1 | Immune-B cells |
| 9.96E-05  | 0.31445306 | 0.639 | 0.383 | 1        | 35 | EIF4G2   | Immune-B cells |
| 0.0001694 | 0.31430167 | 0.262 | 0.113 | 1        | 35 | VMA21    | Immune-B cells |
| 0.000442  | 0.31370542 | 0.361 | 0.195 | 1        | 35 | HNRNPH3  | Immune-B cells |
| 3.00E-06  | 0.31366724 | 0.393 | 0.169 | 0.10093  | 35 | MTURN    | Immune-B cells |
| 5.07E-17  | 0.31342548 | 0.295 | 0.051 | 1.71E-12 | 35 | CLDN5    | Immune-B cells |
| 4.34E-08  | 0.31149632 | 0.492 | 0.197 | 0.00146  | 35 | THBS1    | Immune-B cells |
| 3.21E-09  | 0.31092077 | 0.344 | 0.101 | 0.00011  | 35 | HMGCS2   | Immune-B cells |
| 0.0001611 | 0.30993851 | 0.59  | 0.354 | 1        | 35 | VAMP2    | Immune-B cells |
| 0.000148  | 0.30980855 | 0.475 | 0.261 | 1        | 35 | SRSF7    | Immune-B cells |
| 0.000462  | 0.30978392 | 0.426 | 0.235 | 1        | 35 | FOXP1    | Immune-B cells |
| 0.0001114 | 0.30975386 | 0.508 | 0.285 | 1        | 35 | COX7A2L  | Immune-B cells |
| 6.30E-10  | 0.309598   | 0.311 | 0.085 | 2.12E-05 | 35 | HES4     | Immune-B cells |
| 1.71E-05  | 0.30907081 | 0.377 | 0.172 | 0.57649  | 35 | IDS      | Immune-B cells |
| 6.78E-07  | 0.30762619 | 0.475 | 0.209 | 0.02283  | 35 | EIF5A    | Immune-B cells |
| 2.85E-06  | 0.30738735 | 0.262 | 0.092 | 0.09607  | 35 | FBXL3    | Immune-B cells |
| 0.0007289 | 0.30646628 | 0.311 | 0.158 | 1        | 35 | RAB5B    | Immune-B cells |
| 4.77E-07  | 0.3057035  | 0.59  | 0.286 | 0.01606  | 35 | RBM25    | Immune-B cells |
| 5.02E-06  | 0.30482399 | 0.525 | 0.263 | 0.16923  | 35 | SRSF9    | Immune-B cells |
| 2.90E-07  | 0.30457448 | 0.295 | 0.1   | 0.00977  | 35 | DUSP3    | Immune-B cells |
| 0.0002037 | 0.3038393  | 0.82  | 0.567 | 1        | 35 | CIRBP    | Immune-B cells |
| 0.0002691 | 0.3035001  | 0.41  | 0.213 | 1        | 35 | C8orf4   | Immune-B cells |
| 5.29E-05  | 0.30328555 | 0.328 | 0.145 | 1        | 35 | INC00152 | Immune-B cells |
| 1.29E-05  | 0.30318018 | 0.443 | 0.216 | 0.43624  | 35 | LMAN1    | Immune-B cells |
| 9.65E-06  | 0.30236568 | 0.492 | 0.245 | 0.32502  | 35 | PFN2     | Immune-B cells |
| 0.0001042 | 0.30231573 | 0.508 | 0.278 | 1        | 35 | ANAPC11  | Immune-B cells |
| 0.0041212 | 0.30179032 | 0.279 | 0.151 | 1        | 35 | CYS1     | Immune-B cells |
| 0.0001104 | 0.30150788 | 0.82  | 0.55  | 1        | 35 | UQCRH    | Immune-B cells |
| 4.26E-05  | 0.30102198 | 0.459 | 0.233 | 1        | 35 | ARPC5    | Immune-B cells |
| 0.0011565 | 0.30092481 | 0.361 | 0.206 | 1        | 35 | CTNNA1   | Immune-B cells |
| 3.03E-06  | 0.30078468 | 0.557 | 0.277 | 0.10211  | 35 | RALBP1   | Immune-B cells |
| 4.57E-05  | 0.300635   | 0.311 | 0.133 | 1        | 35 | CCND1    | Immune-B cells |

|           |            |       |       |          |    |          |                |
|-----------|------------|-------|-------|----------|----|----------|----------------|
| 5.92E-05  | 0.30018619 | 0.262 | 0.107 | 1        | 35 | BRWD1    | Immune-B cells |
| 8.16E-06  | 0.29966983 | 0.525 | 0.268 | 0.27485  | 35 | EIF5     | Immune-B cells |
| 0.0041469 | 0.29801121 | 0.361 | 0.218 | 1        | 35 | AK3      | Immune-B cells |
| 0.0001254 | 0.2979931  | 0.295 | 0.133 | 1        | 35 | CBX6     | Immune-B cells |
| 4.16E-05  | 0.29787243 | 0.393 | 0.19  | 1        | 35 | FAM120A  | Immune-B cells |
| 0.0003736 | 0.29645892 | 0.361 | 0.183 | 1        | 35 | CDC42SE2 | Immune-B cells |
| 6.46E-06  | 0.29595428 | 0.377 | 0.162 | 0.21777  | 35 | QKI      | Immune-B cells |
| 0.0012448 | 0.29595246 | 0.377 | 0.212 | 1        | 35 | CAPZB    | Immune-B cells |
| 0.0002207 | 0.29549572 | 0.361 | 0.184 | 1        | 35 | AFF4     | Immune-B cells |
| 4.02E-16  | 0.29481493 | 0.295 | 0.053 | 1.35E-11 | 35 | MYH11    | Immune-B cells |
| 6.79E-05  | 0.29401161 | 0.59  | 0.336 | 1        | 35 | HNRNPU   | Immune-B cells |
| 4.81E-06  | 0.29380365 | 0.393 | 0.173 | 0.16194  | 35 | HNRNPH2  | Immune-B cells |
| 2.64E-06  | 0.29324982 | 0.967 | 0.638 | 0.08909  | 35 | TXNIP    | Immune-B cells |
| 3.55E-05  | 0.29321188 | 0.623 | 0.361 | 1        | 35 | HNRNPA3  | Immune-B cells |
| 8.86E-06  | 0.29318055 | 0.459 | 0.22  | 0.29858  | 35 | HNRNPF   | Immune-B cells |
| 0.0001008 | 0.29252115 | 0.344 | 0.162 | 1        | 35 | CREM     | Immune-B cells |
| 0.0002415 | 0.29220426 | 0.262 | 0.114 | 1        | 35 | PTPN13   | Immune-B cells |
| 3.21E-06  | 0.29137274 | 0.279 | 0.099 | 0.10808  | 35 | CADPS2   | Immune-B cells |
| 0.0006153 | 0.29126886 | 0.607 | 0.385 | 1        | 35 | EID1     | Immune-B cells |
| 3.16E-06  | 0.29124219 | 0.295 | 0.11  | 0.10635  | 35 | NAA50    | Immune-B cells |
| 1.18E-06  | 0.29089807 | 0.607 | 0.298 | 0.03976  | 35 | HIF1A    | Immune-B cells |
| 7.52E-05  | 0.29068327 | 0.295 | 0.128 | 1        | 35 | COPA     | Immune-B cells |
| 0.0005875 | 0.29058742 | 0.311 | 0.158 | 1        | 35 | NAA20    | Immune-B cells |
| 0.0004195 | 0.28979939 | 0.311 | 0.15  | 1        | 35 | YAP1     | Immune-B cells |
| 0.0002957 | 0.28951789 | 0.262 | 0.116 | 1        | 35 | PDXDC1   | Immune-B cells |
| 0.0006947 | 0.28734806 | 0.279 | 0.135 | 1        | 35 | SMAD2    | Immune-B cells |
| 0.000135  | 0.28695954 | 0.607 | 0.351 | 1        | 35 | ATP6V1F  | Immune-B cells |
| 1.42E-05  | 0.286594   | 0.295 | 0.118 | 0.47898  | 35 | CAB39    | Immune-B cells |
| 1.60E-05  | 0.28612682 | 0.459 | 0.22  | 0.53863  | 35 | RHOBTB3  | Immune-B cells |
| 0.0007161 | 0.28594124 | 0.59  | 0.379 | 1        | 35 | MYEOV2   | Immune-B cells |
| 1.04E-05  | 0.28560502 | 0.262 | 0.096 | 0.35153  | 35 | MYH10    | Immune-B cells |
| 0.0007712 | 0.28506076 | 0.361 | 0.195 | 1        | 35 | NCOA7    | Immune-B cells |
| 0.0002856 | 0.28438904 | 0.328 | 0.162 | 1        | 35 | CREBRF   | Immune-B cells |
| 3.74E-06  | 0.28422318 | 0.262 | 0.093 | 0.12597  | 35 | TOM1L1   | Immune-B cells |
| 3.91E-05  | 0.28380044 | 0.311 | 0.135 | 1        | 35 | DDB1     | Immune-B cells |
| 3.77E-06  | 0.28222309 | 0.852 | 0.498 | 0.12689  | 35 | NUCKS1   | Immune-B cells |
| 1.28E-05  | 0.28182965 | 0.311 | 0.127 | 0.43031  | 35 | ZNF664   | Immune-B cells |
| 0.000153  | 0.28116932 | 0.262 | 0.113 | 1        | 35 | LARP1    | Immune-B cells |
| 6.00E-06  | 0.28101561 | 0.574 | 0.293 | 0.20219  | 35 | GLUL     | Immune-B cells |
| 4.43E-05  | 0.28072    | 0.311 | 0.133 | 1        | 35 | EPS8     | Immune-B cells |
| 5.08E-05  | 0.28006884 | 0.508 | 0.262 | 1        | 35 | ARHGAP29 | Immune-B cells |
| 1.77E-08  | 0.27994442 | 0.262 | 0.074 | 0.0006   | 35 | VASN     | Immune-B cells |
| 0.0018937 | 0.2780872  | 0.59  | 0.396 | 1        | 35 | DAZAP2   | Immune-B cells |
| 9.95E-05  | 0.27743174 | 0.295 | 0.126 | 1        | 35 | TBC1D9   | Immune-B cells |
| 0.0008225 | 0.27718158 | 0.279 | 0.135 | 1        | 35 | ZNF518A  | Immune-B cells |
| 0.000675  | 0.27691043 | 0.279 | 0.135 | 1        | 35 | COL6A1   | Immune-B cells |
| 0.0001776 | 0.2761493  | 0.525 | 0.302 | 1        | 35 | CD81     | Immune-B cells |
| 0.0001081 | 0.27589762 | 0.311 | 0.141 | 1        | 35 | USP22    | Immune-B cells |

|           |            |       |       |         |    |          |                |
|-----------|------------|-------|-------|---------|----|----------|----------------|
| 1.19E-05  | 0.27587971 | 0.607 | 0.324 | 0.40256 | 35 | PNRC1    | Immune-B cells |
| 0.000689  | 0.27472588 | 0.689 | 0.451 | 1       | 35 | HIST1H4C | Immune-B cells |
| 2.24E-05  | 0.27461841 | 0.623 | 0.337 | 0.7563  | 35 | C4orf3   | Immune-B cells |
| 6.20E-06  | 0.27461721 | 0.328 | 0.134 | 0.20904 | 35 | UNC50    | Immune-B cells |
| 5.31E-05  | 0.27411931 | 0.262 | 0.105 | 1       | 35 | PDLIM1   | Immune-B cells |
| 3.29E-05  | 0.27396884 | 0.721 | 0.408 | 1       | 35 | CYSTM1   | Immune-B cells |
| 0.0003109 | 0.27211648 | 0.262 | 0.118 | 1       | 35 | EPN1     | Immune-B cells |
| 5.09E-05  | 0.27135636 | 0.328 | 0.143 | 1       | 35 | PTRF     | Immune-B cells |
| 2.75E-05  | 0.27014095 | 0.393 | 0.183 | 0.9275  | 35 | TOP1     | Immune-B cells |
| 0.0003468 | 0.26847078 | 0.508 | 0.291 | 1       | 35 | PABPN1   | Immune-B cells |
| 0.0007302 | 0.26836651 | 0.279 | 0.135 | 1       | 35 | CAND1    | Immune-B cells |
| 6.77E-05  | 0.26711549 | 0.492 | 0.26  | 1       | 35 | CD46     | Immune-B cells |
| 0.0030251 | 0.2662793  | 0.41  | 0.249 | 1       | 35 | NDUFAB1  | Immune-B cells |
| 0.0015181 | 0.26546589 | 0.393 | 0.225 | 1       | 35 | GADD45A  | Immune-B cells |
| 0.0099759 | 0.26523926 | 0.262 | 0.154 | 1       | 35 | MRPL18   | Immune-B cells |
| 0.0001882 | 0.26493794 | 0.443 | 0.236 | 1       | 35 | HNRNPA0  | Immune-B cells |
| 3.56E-07  | 0.26474574 | 0.279 | 0.088 | 0.01199 | 35 | BGN      | Immune-B cells |
| 8.44E-05  | 0.26468841 | 0.803 | 0.517 | 1       | 35 | WSB1     | Immune-B cells |
| 0.0002465 | 0.26461504 | 0.361 | 0.179 | 1       | 35 | CAPZA1   | Immune-B cells |
| 5.70E-05  | 0.26454718 | 0.459 | 0.237 | 1       | 35 | ATRX     | Immune-B cells |
| 0.0021901 | 0.26445872 | 0.262 | 0.133 | 1       | 35 | FEZ2     | Immune-B cells |
| 2.86E-05  | 0.26445136 | 0.475 | 0.243 | 0.96531 | 35 | AHCYL1   | Immune-B cells |
| 0.0017499 | 0.26351197 | 0.311 | 0.167 | 1       | 35 | C16orf72 | Immune-B cells |
| 0.000723  | 0.26349473 | 0.295 | 0.145 | 1       | 35 | RNF11    | Immune-B cells |
| 9.11E-05  | 0.2630914  | 0.311 | 0.139 | 1       | 35 | DHX15    | Immune-B cells |
| 7.54E-06  | 0.26298974 | 0.41  | 0.183 | 0.25392 | 35 | STAT1    | Immune-B cells |
| 0.0002469 | 0.26286721 | 0.967 | 0.748 | 1       | 35 | RPL7     | Immune-B cells |
| 0.0001752 | 0.26233387 | 0.869 | 0.567 | 1       | 35 | MORF4L1  | Immune-B cells |
| 0.0046931 | 0.26232826 | 0.311 | 0.182 | 1       | 35 | PSMB5    | Immune-B cells |
| 0.0013941 | 0.26202619 | 0.361 | 0.201 | 1       | 35 | CNDP2    | Immune-B cells |
| 0.0037142 | 0.26165504 | 0.295 | 0.162 | 1       | 35 | MAT2B    | Immune-B cells |
| 1.39E-05  | 0.26056791 | 0.295 | 0.118 | 0.46799 | 35 | IAH1     | Immune-B cells |
| 0.0067492 | 0.26044291 | 0.361 | 0.221 | 1       | 35 | CYC1     | Immune-B cells |
| 0.0010492 | 0.25947274 | 0.311 | 0.163 | 1       | 35 | C7orf50  | Immune-B cells |
| 0.0001287 | 0.25945652 | 0.803 | 0.484 | 1       | 35 | LDHB     | Immune-B cells |
| 0.000293  | 0.25917479 | 0.361 | 0.181 | 1       | 35 | DDIT3    | Immune-B cells |
| 2.29E-05  | 0.25909677 | 0.607 | 0.325 | 0.77315 | 35 | ARF6     | Immune-B cells |
| 9.05E-05  | 0.25902929 | 0.328 | 0.149 | 1       | 35 | PABPC4   | Immune-B cells |
| 1.47E-05  | 0.25885945 | 0.459 | 0.218 | 0.49651 | 35 | CMTM6    | Immune-B cells |
| 0.0011297 | 0.25867708 | 0.344 | 0.186 | 1       | 35 | PNRC2    | Immune-B cells |
| 0.004688  | 0.25867483 | 0.377 | 0.233 | 1       | 35 | SDHC     | Immune-B cells |
| 8.96E-07  | 0.25847662 | 0.279 | 0.093 | 0.03018 | 35 | TBX2     | Immune-B cells |
| 0.002004  | 0.25820156 | 0.754 | 0.542 | 1       | 35 | NRNPA2B  | Immune-B cells |
| 4.24E-07  | 0.25769801 | 0.574 | 0.26  | 0.01428 | 35 | FAM107B  | Immune-B cells |
| 0.0055449 | 0.2576917  | 0.295 | 0.169 | 1       | 35 | SLC25A36 | Immune-B cells |
| 0.0005108 | 0.25766019 | 0.328 | 0.164 | 1       | 35 | PDLIM5   | Immune-B cells |
| 0.0016954 | 0.25546318 | 0.295 | 0.155 | 1       | 35 | GGNBP2   | Immune-B cells |
| 3.99E-08  | 0.2537661  | 0.262 | 0.075 | 0.00134 | 35 | PPP1R12E | Immune-B cells |

|           |            |       |       |          |    |          |                |
|-----------|------------|-------|-------|----------|----|----------|----------------|
| 0.0006718 | 0.25338055 | 0.311 | 0.155 | 1        | 35 | SUMF2    | Immune-B cells |
| 3.13E-05  | 0.25189077 | 0.738 | 0.434 | 1        | 35 | DNAJB1   | Immune-B cells |
| 0.0007948 | 0.2518548  | 0.311 | 0.157 | 1        | 35 | PTPRG    | Immune-B cells |
| 4.03E-05  | 0.25149669 | 0.262 | 0.104 | 1        | 35 | TRIM8    | Immune-B cells |
| 0.0048766 | 0.25052592 | 0.443 | 0.29  | 1        | 35 | SRRM2    | Immune-B cells |
| 0.0002989 | 0.25010951 | 0.279 | 0.127 | 1        | 35 | LIMS1    | Immune-B cells |
| 6.99E-92  | 6.5148081  | 0.48  | 0.026 | 2.36E-87 | 36 | IGKC     | Immune-B cells |
| 4.48E-209 | 6.49246916 | 0.44  | 0.01  | #####    | 36 | IGLC2    | Immune-B cells |
| 1.59E-246 | 6.08218174 | 0.4   | 0.007 | #####    | 36 | IGLC3    | Immune-B cells |
| 0         | 5.52365733 | 0.6   | 0.005 | 0        | 36 | IGHG1    | Immune-B cells |
| 0         | 5.51221574 | 0.62  | 0.005 | 0        | 36 | IGHG3    | Immune-B cells |
| 3.60E-135 | 5.31912173 | 0.28  | 0.006 | #####    | 36 | IGHM     | Immune-B cells |
| 0         | 5.28256102 | 0.66  | 0.007 | 0        | 36 | JCHAIN   | Immune-B cells |
| 0         | 4.69300059 | 0.32  | 0.001 | 0        | 36 | IGHG2    | Immune-B cells |
| 0         | 4.484633   | 0.54  | 0.001 | 0        | 36 | IGHG4    | Immune-B cells |
| 0         | 2.70442626 | 0.76  | 0.002 | 0        | 36 | MZB1     | Immune-B cells |
| 4.65E-32  | 2.40397955 | 0.88  | 0.36  | 1.57E-27 | 36 | SSR4     | Immune-B cells |
| 2.74E-82  | 1.83632156 | 0.6   | 0.046 | 9.24E-78 | 36 | FKBP11   | Immune-B cells |
| 0         | 1.71645374 | 0.48  | 0.001 | 0        | 36 | TNFRSF17 | Immune-B cells |
| 2.42E-19  | 1.59104025 | 0.76  | 0.306 | 8.14E-15 | 36 | HERPUD1  | Immune-B cells |
| 0         | 1.56354506 | 0.46  | 0.005 | 0        | 36 | DERL3    | Immune-B cells |
| 1.03E-15  | 1.17060214 | 0.48  | 0.131 | 3.48E-11 | 36 | SEC11C   | Immune-B cells |
| 7.10E-50  | 1.10676665 | 0.36  | 0.026 | 2.39E-45 | 36 | ISG20    | Immune-B cells |
| 0         | 1.04696468 | 0.3   | 0.001 | 0        | 36 | FCRL5    | Immune-B cells |
| 2.46E-11  | 0.99619435 | 0.74  | 0.368 | 8.29E-07 | 36 | CYBA     | Immune-B cells |
| 3.53E-195 | 0.9623038  | 0.34  | 0.006 | #####    | 36 | CD27     | Immune-B cells |
| 7.55E-06  | 0.93418448 | 0.44  | 0.22  | 0.25452  | 36 | XBP1     | Immune-B cells |
| 0.0010012 | 0.88262004 | 0.5   | 0.326 | 1        | 36 | SELK     | Immune-B cells |
| 8.57E-08  | 0.85635315 | 0.38  | 0.139 | 0.00289  | 36 | SDF2L1   | Immune-B cells |
| 1.60E-06  | 0.7986856  | 0.3   | 0.107 | 0.05401  | 36 | PRDX4    | Immune-B cells |
| 4.44E-06  | 0.77406766 | 0.52  | 0.291 | 0.14957  | 36 | VIMP     | Immune-B cells |
| 1.15E-08  | 0.76029676 | 0.32  | 0.095 | 0.00039  | 36 | UBE2J1   | Immune-B cells |
| 1.25E-06  | 0.72987346 | 0.34  | 0.129 | 0.04199  | 36 | MANF     | Immune-B cells |
| 0.0006736 | 0.6225917  | 0.26  | 0.119 | 1        | 36 | NUCB2    | Immune-B cells |
| 0.0001727 | 0.62224733 | 0.32  | 0.147 | 1        | 36 | ERLEC1   | Immune-B cells |
| 1.18E-05  | 0.59162995 | 0.66  | 0.454 | 0.39896  | 36 | HSP90B1  | Immune-B cells |
| 4.16E-08  | 0.57910957 | 0.38  | 0.125 | 0.0014   | 36 | CXCR4    | Immune-B cells |
| 0.0004722 | 0.57645907 | 0.32  | 0.157 | 1        | 36 | SPCS3    | Immune-B cells |
| 0.000137  | 0.55639737 | 0.3   | 0.131 | 1        | 36 | DNAJB9   | Immune-B cells |
| 0.0004533 | 0.54396587 | 0.26  | 0.112 | 1        | 36 | CREB3L2  | Immune-B cells |
| 0.005168  | 0.50124921 | 0.52  | 0.393 | 1        | 36 | SPCS2    | Immune-B cells |
| 0.0012674 | 0.40222845 | 0.3   | 0.143 | 1        | 36 | SRGN     | Immune-B cells |
| 0.0006349 | 0.33066569 | 0.28  | 0.122 | 1        | 36 | BIRC3    | Immune-B cells |

## Mux-Seq markers

| p_val      | avg_logFC  | pct.1 | pct.2 | p_val_adj | cluster | Gene    | Cell type |
|------------|------------|-------|-------|-----------|---------|---------|-----------|
| 0          | 0.61528488 | 0.485 | 0.101 | 0         | 0       | CCL5    | T Cells   |
| 0          | 0.36909192 | 0.361 | 0.093 | 0         | 0       | CD69    | T Cells   |
| 0          | 0.25500115 | 0.269 | 0.048 | 0         | 0       | CD3D    | T Cells   |
| 0          | 0.3826042  | 0.418 | 0.115 | 0         | 0       | CD52    | T Cells   |
| 0          | 0.22917641 | 0.169 | 0.032 | 0         | 0       | KLRB1   | T Cells   |
| 0          | 0.42013676 | 0.488 | 0.17  | 0         | 0       | CXCR4   | T Cells   |
| 0          | 0.38424015 | 0.43  | 0.138 | 0         | 0       | IL32    | T Cells   |
| 0          | 0.21198794 | 0.225 | 0.043 | 0         | 0       | CD2     | T Cells   |
| 0          | 0.38229432 | 0.509 | 0.234 | 0         | 0       | BTG1    | T Cells   |
| 1.285E-252 | 0.28590407 | 0.223 | 0.092 | 2.6E-248  | 0       | CCL4    | T Cells   |
| 0          | 0.25215529 | 0.301 | 0.127 | 0         | 0       | RGS1    | T Cells   |
| 0          | 0.32462008 | 0.571 | 0.339 | 0         | 0       | PABPC1  | T Cells   |
| 0          | 0.47151191 | 0.985 | 0.94  | 0         | 0       | RPS27   | T Cells   |
| 0          | 0.36138777 | 0.747 | 0.576 | 0         | 0       | RPS15A  | T Cells   |
| 0          | 0.37131904 | 0.912 | 0.839 | 0         | 0       | RPS29   | T Cells   |
| 0          | 0.38481933 | 0.994 | 0.948 | 0         | 0       | B2M     | T Cells   |
| 1.049E-235 | 0.21632102 | 0.339 | 0.183 | 2.1E-231  | 0       | ZFP36L2 | T Cells   |
| 1.174E-277 | 0.28646049 | 0.633 | 0.47  | 2.4E-273  | 0       | RPS26   | T Cells   |
| 0          | 0.36254969 | 1     | 0.997 | 0         | 0       | MALAT1  | T Cells   |
| 0          | 0.34669154 | 0.944 | 0.901 | 0         | 0       | RPL21   | T Cells   |
| 1.275E-246 | 0.28081806 | 0.676 | 0.536 | 2.6E-242  | 0       | RPL18A  | T Cells   |
| 0          | 0.31840485 | 0.868 | 0.782 | 0         | 0       | RPL13A  | T Cells   |
| 9.098E-282 | 0.28046593 | 0.72  | 0.572 | 1.8E-277  | 0       | RPL28   | T Cells   |
| 1.054E-255 | 0.28603624 | 0.702 | 0.573 | 2.1E-251  | 0       | RPLP2   | T Cells   |
| 0          | 0.30417245 | 0.88  | 0.811 | 0         | 0       | RPL13   | T Cells   |
| 9.321E-204 | 0.25962962 | 0.655 | 0.53  | 1.9E-199  | 0       | RPL23A  | T Cells   |
| 4.435E-208 | 0.25783263 | 0.67  | 0.545 | 9E-204    | 0       | RPS25   | T Cells   |
| 2.735E-174 | 0.22959193 | 0.545 | 0.404 | 5.5E-170  | 0       | RPS3    | T Cells   |
| 1.198E-303 | 0.29060543 | 0.915 | 0.864 | 2.4E-299  | 0       | RPL39   | T Cells   |
| 2.572E-228 | 0.26349674 | 0.83  | 0.754 | 5.2E-224  | 0       | RPL32   | T Cells   |
| 3.567E-284 | 0.25954458 | 0.873 | 0.792 | 7.2E-280  | 0       | RPS19   | T Cells   |
| 4.244E-233 | 0.25705701 | 0.848 | 0.774 | 8.6E-229  | 0       | RPL10   | T Cells   |
| 1.024E-150 | 0.23628683 | 0.688 | 0.597 | 2.1E-146  | 0       | RPS12   | T Cells   |
| 5.547E-153 | 0.21657255 | 0.622 | 0.502 | 1.1E-148  | 0       | RPL35A  | T Cells   |
| 2.968E-250 | 0.24660338 | 0.842 | 0.774 | 6E-246    | 0       | RPS15   | T Cells   |
| 2.361E-151 | 0.22062124 | 0.807 | 0.765 | 4.8E-147  | 0       | RPS27A  | T Cells   |
| 2.745E-178 | 0.2160401  | 0.861 | 0.805 | 5.5E-174  | 0       | RPS18   | T Cells   |
| 2.637E-176 | 0.22365807 | 0.962 | 0.945 | 5.3E-172  | 0       | RPL34   | T Cells   |
| 3.366E-206 | -0.2679239 | 0.018 | 0.148 | 6.8E-202  | 0       | CXCL2   | T Cells   |
| 1.063E-128 | -0.2034876 | 0.02  | 0.11  | 2.1E-124  | 0       | MGP     | T Cells   |
| 1.293E-186 | -0.2021983 | 0.037 | 0.167 | 2.6E-182  | 0       | FCER1G  | T Cells   |
| 1.524E-131 | -0.2297352 | 0.024 | 0.117 | 3.1E-127  | 0       | CTGF    | T Cells   |
| 7.531E-198 | -0.21185   | 0.04  | 0.178 | 1.5E-193  | 0       | CD24    | T Cells   |
| 3.561E-193 | -0.2153871 | 0.039 | 0.175 | 7.2E-189  | 0       | HES1    | T Cells   |
| 2.279E-144 | -0.3063001 | 0.022 | 0.121 | 4.6E-140  | 0       | IGFBP5  | T Cells   |

|            |            |       |       |          |   |         |                   |
|------------|------------|-------|-------|----------|---|---------|-------------------|
| 4.411E-265 | -0.2411636 | 0.056 | 0.233 | 8.9E-261 | 0 | NPC2    | T Cells           |
| 1.43E-222  | -0.36004   | 0.029 | 0.173 | 2.9E-218 | 0 | LYZ     | T Cells           |
| 0          | -0.2767903 | 0.061 | 0.267 | 0        | 0 | IFITM3  | T Cells           |
| 8.548E-264 | -0.2603853 | 0.058 | 0.237 | 1.7E-259 | 0 | PSAP    | T Cells           |
| 9.745E-234 | -0.3260923 | 0.038 | 0.192 | 2E-229   | 0 | WFDC2   | T Cells           |
| 9.343E-237 | -0.3282356 | 0.038 | 0.193 | 1.9E-232 | 0 | DEFB1   | T Cells           |
| 3.962E-208 | -0.2124926 | 0.074 | 0.232 | 8E-204   | 0 | HSPB1   | T Cells           |
| 2.643E-229 | -0.2740069 | 0.056 | 0.215 | 5.3E-225 | 0 | AIF1    | T Cells           |
| 0          | -0.3295503 | 0.06  | 0.276 | 0        | 0 | IGFBP7  | T Cells           |
| 4.588E-195 | -0.2490873 | 0.062 | 0.205 | 9.3E-191 | 0 | TYROBP  | T Cells           |
| 0          | -0.3389631 | 0.071 | 0.312 | 0        | 0 | CST3    | T Cells           |
| 4.451E-244 | -0.3440887 | 0.048 | 0.212 | 9E-240   | 0 | CLU     | T Cells           |
| 7.544E-109 | -0.2330076 | 0.047 | 0.137 | 1.5E-104 | 0 | C1QA    | T Cells           |
| 3.228E-199 | -0.2131477 | 0.098 | 0.258 | 6.5E-195 | 0 | DSTN    | T Cells           |
| 2.707E-190 | -0.2380423 | 0.077 | 0.225 | 5.5E-186 | 0 | CTSD    | T Cells           |
| 2.165E-233 | -0.2855565 | 0.069 | 0.235 | 4.4E-229 | 0 | FXD2    | T Cells           |
| 4.475E-141 | -0.2860575 | 0.046 | 0.156 | 9E-137   | 0 | TIMP1   | T Cells           |
| 1.097E-304 | -0.4146084 | 0.056 | 0.25  | 2.2E-300 | 0 | ADIRF   | T Cells           |
| 7.036E-303 | -0.3883147 | 0.062 | 0.259 | 1.4E-298 | 0 | ATP1B1  | T Cells           |
| 3.384E-159 | -0.2013614 | 0.131 | 0.276 | 6.8E-155 | 0 | VIM     | T Cells           |
| 5.649E-165 | -0.2327374 | 0.123 | 0.269 | 1.1E-160 | 0 | HSPA1A  | T Cells           |
| 2.157E-113 | -0.2749915 | 0.068 | 0.167 | 4.4E-109 | 0 | APOE    | T Cells           |
| 2.914E-200 | -0.2549947 | 0.135 | 0.303 | 5.9E-196 | 0 | EGR1    | T Cells           |
| 7.625E-140 | -0.2909133 | 0.162 | 0.299 | 1.5E-135 | 0 | LGALS1  | T Cells           |
| 2.184E-292 | -0.3138357 | 0.226 | 0.444 | 4.4E-288 | 0 | ITM2B   | T Cells           |
| 9.8672E-71 | -0.2860342 | 0.118 | 0.201 | 1.99E-66 | 0 | MT1X    | T Cells           |
| 0          | -0.6026878 | 0.083 | 0.297 | 0        | 0 | SPP1    | T Cells           |
| 2.716E-248 | -0.357304  | 0.253 | 0.444 | 5.5E-244 | 0 | SAT1    | T Cells           |
| 1.765E-238 | -0.3925694 | 0.204 | 0.385 | 3.6E-234 | 0 | CD74    | T Cells           |
| 1.861E-208 | -0.2909113 | 0.554 | 0.717 | 3.8E-204 | 0 | NEAT1   | T Cells           |
| 0          | -0.4453353 | 0.268 | 0.487 | 0        | 0 | S100A6  | T Cells           |
| 6.355E-303 | -0.6033046 | 0.155 | 0.358 | 1.3E-298 | 0 | HLA-DRA | T Cells           |
| 3.51E-109  | -0.3155194 | 0.505 | 0.596 | 7.1E-105 | 0 | FOS     | T Cells           |
| 2.467E-160 | -0.2789946 | 0.933 | 0.955 | 5E-156   | 0 | MT-ND1  | T Cells           |
| 1.275E-121 | -0.4077267 | 0.253 | 0.375 | 2.6E-117 | 0 | MT2A    | T Cells           |
| 1.392E-250 | -0.438707  | 0.423 | 0.592 | 2.8E-246 | 0 | FTH1    | T Cells           |
| 2.9402E-68 | -0.6112502 | 0.147 | 0.228 | 5.94E-64 | 0 | MT1G    | T Cells           |
| 2.257E-153 | -0.7050549 | 0.621 | 0.717 | 4.6E-149 | 0 | FTL     | T Cells           |
| 0.00518808 | -1.4838242 | 0.185 | 0.165 | 1        | 0 | IGKC    | T Cells           |
| 0          | 0.84998692 | 0.625 | 0.028 | 0        | 1 | VWF     | Endothelial cells |
| 0          | 0.47012233 | 0.366 | 0.012 | 0        | 1 | ACKR1   | Endothelial cells |
| 0          | 0.90056783 | 0.673 | 0.047 | 0        | 1 | SPARCL1 | Endothelial cells |
| 0          | 0.33210973 | 0.301 | 0.011 | 0        | 1 | COL15A1 | Endothelial cells |
| 0          | 0.25069062 | 0.18  | 0.005 | 0        | 1 | SELE    | Endothelial cells |
| 0          | 0.46976604 | 0.471 | 0.028 | 0        | 1 | HSPG2   | Endothelial cells |
| 0          | 0.46493325 | 0.4   | 0.026 | 0        | 1 | CAV1    | Endothelial cells |
| 0          | 0.33640117 | 0.272 | 0.014 | 0        | 1 | EDN1    | Endothelial cells |
| 0          | 0.23604646 | 0.24  | 0.011 | 0        | 1 | ADGRL4  | Endothelial cells |

|            |            |       |       |          |   |        |                   |
|------------|------------|-------|-------|----------|---|--------|-------------------|
| 0          | 0.44446785 | 0.42  | 0.037 | 0        | 1 | TM4SF1 | Endothelial cells |
| 0          | 0.20894908 | 0.217 | 0.01  | 0        | 1 | NUAK1  | Endothelial cells |
| 0          | 0.6781792  | 0.452 | 0.069 | 0        | 1 | CTGF   | Endothelial cells |
| 0          | 0.44270675 | 0.468 | 0.051 | 0        | 1 | GNG11  | Endothelial cells |
| 0          | 0.55899609 | 0.53  | 0.076 | 0        | 1 | IFI27  | Endothelial cells |
| 0          | 0.43563087 | 0.435 | 0.05  | 0        | 1 | A2M    | Endothelial cells |
| 0          | 0.51265068 | 0.49  | 0.073 | 0        | 1 | SPARC  | Endothelial cells |
| 0          | 0.41205521 | 0.443 | 0.055 | 0        | 1 | TCF4   | Endothelial cells |
| 0          | 0.20743986 | 0.22  | 0.014 | 0        | 1 | CALCRL | Endothelial cells |
| 0          | 0.27848499 | 0.288 | 0.025 | 0        | 1 | EGFL7  | Endothelial cells |
| 0          | 0.20828908 | 0.224 | 0.015 | 0        | 1 | PCAT19 | Endothelial cells |
| 0          | 0.48250429 | 0.415 | 0.066 | 0        | 1 | MGP    | Endothelial cells |
| 0          | 0.24983032 | 0.138 | 0.012 | 0        | 1 | RBP7   | Endothelial cells |
| 0          | 0.34772615 | 0.328 | 0.04  | 0        | 1 | CYR61  | Endothelial cells |
| 0          | 0.27941073 | 0.312 | 0.031 | 0        | 1 | ENG    | Endothelial cells |
| 0          | 0.33572199 | 0.312 | 0.038 | 0        | 1 | SPRY1  | Endothelial cells |
| 0          | 0.26771327 | 0.242 | 0.024 | 0        | 1 | COL4A1 | Endothelial cells |
| 0          | 0.26144726 | 0.296 | 0.03  | 0        | 1 | PECAM1 | Endothelial cells |
| 0          | 0.25716984 | 0.29  | 0.029 | 0        | 1 | CD93   | Endothelial cells |
| 0          | 0.20853861 | 0.225 | 0.019 | 0        | 1 | PRSS23 | Endothelial cells |
| 0          | 0.47932728 | 0.543 | 0.113 | 0        | 1 | FKBP1A | Endothelial cells |
| 0          | 0.29405553 | 0.328 | 0.042 | 0        | 1 | EPAS1  | Endothelial cells |
| 0          | 0.52194519 | 0.64  | 0.197 | 0        | 1 | IFITM3 | Endothelial cells |
| 0          | 0.53709241 | 0.644 | 0.205 | 0        | 1 | IGFBP7 | Endothelial cells |
| 0          | 0.20690534 | 0.14  | 0.018 | 0        | 1 | CXCL12 | Endothelial cells |
| 0          | 0.20308867 | 0.242 | 0.031 | 0        | 1 | PTRF   | Endothelial cells |
| 0          | 0.33698719 | 0.332 | 0.075 | 0        | 1 | THBS1  | Endothelial cells |
| 0          | 0.2697974  | 0.327 | 0.064 | 0        | 1 | CRIM1  | Endothelial cells |
| 0          | 0.21752382 | 0.256 | 0.043 | 0        | 1 | PRCP   | Endothelial cells |
| 0          | 0.46137122 | 0.604 | 0.22  | 0        | 1 | VIM    | Endothelial cells |
| 0          | 0.24968833 | 0.313 | 0.068 | 0        | 1 | TGFBR2 | Endothelial cells |
| 0          | 0.30591673 | 0.405 | 0.109 | 0        | 1 | CD59   | Endothelial cells |
| 0          | 0.3064916  | 0.262 | 0.077 | 0        | 1 | TIMP3  | Endothelial cells |
| 7.896E-189 | 0.20369063 | 0.182 | 0.063 | 1.6E-184 | 1 | CCL2   | Endothelial cells |
| 8.076E-256 | 0.34480894 | 0.667 | 0.451 | 1.6E-251 | 1 | RPL3   | Endothelial cells |
| 8.917E-245 | 0.348397   | 0.669 | 0.46  | 1.8E-240 | 1 | RPS2   | Endothelial cells |
| 0          | 0.45374995 | 0.895 | 0.805 | 0        | 1 | RPS18  | Endothelial cells |
| 2.345E-281 | 0.3762878  | 0.772 | 0.577 | 4.7E-277 | 1 | RPS6   | Endothelial cells |
| 4.562E-271 | 0.24645943 | 0.474 | 0.239 | 9.2E-267 | 1 | POLR2L | Endothelial cells |
| 5.236E-120 | 0.2265789  | 0.239 | 0.118 | 1.1E-115 | 1 | CXCL2  | Endothelial cells |
| 0          | 0.40111008 | 0.886 | 0.795 | 0        | 1 | RPS19  | Endothelial cells |
| 3.37E-265  | 0.3218924  | 0.75  | 0.547 | 6.8E-261 | 1 | TPT1   | Endothelial cells |
| 6.177E-228 | 0.22142739 | 0.432 | 0.223 | 1.2E-223 | 1 | MYL12A | Endothelial cells |
| 2.4E-230   | 0.31560864 | 0.749 | 0.569 | 4.8E-226 | 1 | RPL26  | Endothelial cells |
| 3.565E-209 | 0.26548028 | 0.618 | 0.405 | 7.2E-205 | 1 | RPS3   | Endothelial cells |
| 2.78E-180  | 0.2221406  | 0.438 | 0.245 | 5.6E-176 | 1 | ZFP36  | Endothelial cells |
| 3.701E-262 | 0.31801488 | 0.815 | 0.654 | 7.5E-258 | 1 | RPS28  | Endothelial cells |
| 7.701E-160 | 0.21718896 | 0.449 | 0.262 | 1.6E-155 | 1 | EGR1   | Endothelial cells |

|            |            |       |       |          |   |         |                    |
|------------|------------|-------|-------|----------|---|---------|--------------------|
| 1.74E-191  | 0.24744807 | 0.607 | 0.407 | 3.5E-187 | 1 | RPL15   | Endothelial cells  |
| 2.922E-191 | 0.26129305 | 0.738 | 0.56  | 5.9E-187 | 1 | RPS23   | Endothelial cells  |
| 4.467E-166 | 0.24050971 | 0.662 | 0.478 | 9E-162   | 1 | RPL7    | Endothelial cells  |
| 1.659E-220 | 0.28166263 | 0.853 | 0.726 | 3.4E-216 | 1 | EEF1A1  | Endothelial cells  |
| 3.653E-202 | 0.25708045 | 0.796 | 0.622 | 7.4E-198 | 1 | RPL36   | Endothelial cells  |
| 8.003E-172 | 0.25296264 | 0.764 | 0.594 | 1.6E-167 | 1 | RPS12   | Endothelial cells  |
| 5.653E-262 | 0.31462774 | 0.968 | 0.945 | 1.1E-257 | 1 | RPL34   | Endothelial cells  |
| 6.412E-196 | 0.26930991 | 0.86  | 0.755 | 1.3E-191 | 1 | RPL32   | Endothelial cells  |
| 6.965E-153 | 0.22843925 | 0.71  | 0.541 | 1.4E-148 | 1 | RPL37A  | Endothelial cells  |
| 4.42E-153  | 0.20337655 | 0.641 | 0.446 | 8.9E-149 | 1 | RPS17   | Endothelial cells  |
| 8.433E-156 | 0.2616185  | 0.863 | 0.777 | 1.7E-151 | 1 | RPL10   | Endothelial cells  |
| 1.916E-153 | 0.2422156  | 0.813 | 0.681 | 3.9E-149 | 1 | RPS8    | Endothelial cells  |
| 3.026E-128 | 0.20667043 | 0.605 | 0.434 | 6.1E-124 | 1 | RPS4X   | Endothelial cells  |
| 7.825E-145 | 0.20100963 | 0.664 | 0.477 | 1.6E-140 | 1 | RPS26   | Endothelial cells  |
| 1.256E-178 | 0.24209182 | 0.902 | 0.783 | 2.5E-174 | 1 | TMSB10  | Endothelial cells  |
| 4.512E-128 | 0.21697695 | 0.708 | 0.552 | 9.1E-124 | 1 | RPL12   | Endothelial cells  |
| 7.387E-136 | 0.21489971 | 0.747 | 0.586 | 1.5E-131 | 1 | RPS15A  | Endothelial cells  |
| 6.4E-128   | 0.22672941 | 0.901 | 0.87  | 1.3E-123 | 1 | RPL41   | Endothelial cells  |
| 2.907E-149 | 0.21137382 | 0.913 | 0.84  | 5.9E-145 | 1 | PTMA    | Endothelial cells  |
| 1.257E-118 | 0.21047572 | 0.956 | 0.88  | 2.5E-114 | 1 | TMSB4X  | Endothelial cells  |
| 3.17E-134  | 0.20286988 | 0.885 | 0.815 | 6.4E-130 | 1 | RPL13   | Endothelial cells  |
| 4.311E-132 | -0.2107804 | 0.026 | 0.16  | 8.7E-128 | 1 | FCER1G  | Endothelial cells  |
| 9.809E-139 | -0.2178674 | 0.029 | 0.171 | 2E-134   | 1 | CD24    | Endothelial cells  |
| 1.0779E-86 | -0.2158624 | 0.023 | 0.118 | 2.18E-82 | 1 | CCL3    | Endothelial cells  |
| 4.887E-168 | -0.2747181 | 0.034 | 0.199 | 9.9E-164 | 1 | TYROBP  | Endothelial cells  |
| 1.509E-111 | -0.2087169 | 0.039 | 0.164 | 3E-107   | 1 | RGS1    | Endothelial cells  |
| 1.368E-174 | -0.2871727 | 0.036 | 0.208 | 2.8E-170 | 1 | AIF1    | Endothelial cells  |
| 2.308E-134 | -0.3361458 | 0.027 | 0.164 | 4.7E-130 | 1 | LYZ     | Endothelial cells  |
| 4.6129E-88 | -0.2421694 | 0.033 | 0.133 | 9.32E-84 | 1 | C1QA    | Endothelial cells  |
| 9.878E-166 | -0.2965913 | 0.054 | 0.226 | 2E-161   | 1 | FXVD2   | Endothelial cells  |
| 2.2E-126   | -0.2991715 | 0.044 | 0.183 | 4.4E-122 | 1 | DEFB1   | Endothelial cells  |
| 6.606E-117 | -0.2812753 | 0.048 | 0.182 | 1.3E-112 | 1 | WFDC2   | Endothelial cells  |
| 3.88E-152  | -0.2455946 | 0.075 | 0.245 | 7.8E-148 | 1 | S100A4  | Endothelial cells  |
| 2.5939E-78 | -0.2083179 | 0.063 | 0.166 | 5.24E-74 | 1 | CCL5    | Endothelial cells  |
| 1.452E-106 | -0.2098322 | 0.092 | 0.229 | 2.9E-102 | 1 | CXCR4   | Endothelial cells  |
| 1.252E-103 | -0.2226995 | 0.084 | 0.216 | 2.5E-99  | 1 | CTSD    | Endothelial cells  |
| 7.2895E-89 | -0.2796725 | 0.053 | 0.163 | 1.47E-84 | 1 | APOE    | Endothelial cells  |
| 4.685E-199 | -0.2808432 | 0.101 | 0.309 | 9.5E-195 | 1 | CYBA    | Endothelial cells  |
| 1.055E-179 | -0.3715278 | 0.062 | 0.247 | 2.1E-175 | 1 | ATP1B1  | Endothelial cells  |
| 4.708E-202 | -0.573524  | 0.081 | 0.285 | 9.5E-198 | 1 | SPP1    | Endothelial cells  |
| 1.254E-153 | -0.3535267 | 0.256 | 0.432 | 2.5E-149 | 1 | SAT1    | Endothelial cells  |
| 2.7639E-83 | -0.2524203 | 0.726 | 0.799 | 5.59E-79 | 1 | MT-ND4L | Endothelial cells  |
| 2.9204E-65 | -0.6072455 | 0.124 | 0.226 | 5.9E-61  | 1 | MT1G    | Endothelial cells  |
| 1.46E-101  | -0.395138  | 0.494 | 0.575 | 2.95E-97 | 1 | FTH1    | Endothelial cells  |
| 7.496E-200 | -0.8147419 | 0.586 | 0.714 | 1.5E-195 | 1 | FTL     | Endothelial cells  |
| 4.0781E-25 | -1.5241584 | 0.118 | 0.173 | 8.24E-21 | 1 | IGKC    | Endothelial cells  |
| 0          | 0.86537795 | 0.426 | 0.031 | 0        | 2 | S100A8  | Immune/Neutrophils |
| 0          | 0.51141201 | 0.373 | 0.019 | 0        | 2 | IL1B    | Immune/Neutrophils |

|            |            |       |       |          |   |           |                    |
|------------|------------|-------|-------|----------|---|-----------|--------------------|
| 0          | 1.04412793 | 0.696 | 0.102 | 0        | 2 | LYZ       | Immune/Neutrophils |
| 0          | 0.62496135 | 0.49  | 0.057 | 0        | 2 | 11-1143G9 | Immune/Neutrophils |
| 0          | 0.22195943 | 0.156 | 0.007 | 0        | 2 | EREG      | Immune/Neutrophils |
| 0          | 0.65520805 | 0.419 | 0.056 | 0        | 2 | S100A9    | Immune/Neutrophils |
| 0          | 0.60588677 | 0.365 | 0.047 | 0        | 2 | CXCL8     | Immune/Neutrophils |
| 0          | 0.30486082 | 0.26  | 0.026 | 0        | 2 | VCAN      | Immune/Neutrophils |
| 0          | 0.41468779 | 0.418 | 0.058 | 0        | 2 | LST1      | Immune/Neutrophils |
| 0          | 0.51741085 | 0.535 | 0.095 | 0        | 2 | NAMPT     | Immune/Neutrophils |
| 0          | 0.65322144 | 0.369 | 0.085 | 0        | 2 | CCL3      | Immune/Neutrophils |
| 0          | 0.25484534 | 0.234 | 0.022 | 0        | 2 | BCL2A1    | Immune/Neutrophils |
| 0          | 0.62328913 | 0.652 | 0.15  | 0        | 2 | AIF1      | Immune/Neutrophils |
| 0          | 0.58452867 | 0.651 | 0.141 | 0        | 2 | TYROBP    | Immune/Neutrophils |
| 0          | 0.6048551  | 0.423 | 0.102 | 0        | 2 | CXCL2     | Immune/Neutrophils |
| 0          | 0.39664957 | 0.27  | 0.043 | 0        | 2 | CXCL3     | Immune/Neutrophils |
| 0          | 0.48386517 | 0.535 | 0.112 | 0        | 2 | FCER1G    | Immune/Neutrophils |
| 0          | 0.29120872 | 0.305 | 0.042 | 0        | 2 | MNDA      | Immune/Neutrophils |
| 0          | 0.4197454  | 0.482 | 0.098 | 0        | 2 | CTSS      | Immune/Neutrophils |
| 0          | 0.32943118 | 0.222 | 0.038 | 0        | 2 | CCL3L3    | Immune/Neutrophils |
| 0          | 0.66173111 | 0.767 | 0.288 | 0        | 2 | HLA-DRA   | Immune/Neutrophils |
| 0          | 0.2015176  | 0.214 | 0.025 | 0        | 2 | PLAUR     | Immune/Neutrophils |
| 0          | 0.73468814 | 0.793 | 0.35  | 0        | 2 | DUSP1     | Immune/Neutrophils |
| 0          | 0.59676722 | 0.692 | 0.255 | 0        | 2 | SRGN      | Immune/Neutrophils |
| 0          | 0.68390151 | 0.812 | 0.38  | 0        | 2 | SAT1      | Immune/Neutrophils |
| 0          | 0.24699646 | 0.278 | 0.05  | 0        | 2 | CD83      | Immune/Neutrophils |
| 0          | 0.48524952 | 0.542 | 0.192 | 0        | 2 | NFKBIA    | Immune/Neutrophils |
| 0          | 0.82009697 | 0.915 | 0.552 | 0        | 2 | FOS       | Immune/Neutrophils |
| 0          | 0.22286328 | 0.253 | 0.045 | 0        | 2 | CYBB      | Immune/Neutrophils |
| 0          | 0.34158151 | 0.406 | 0.111 | 0        | 2 | SOD2      | Immune/Neutrophils |
| 0          | 0.34158151 | 0.406 | 0.111 | 0        | 2 | SOD2      | Immune/Neutrophils |
| 0          | 0.27447795 | 0.308 | 0.069 | 0        | 2 | RGS2      | Immune/Neutrophils |
| 0          | 0.74796006 | 0.879 | 0.538 | 0        | 2 | FTH1      | Immune/Neutrophils |
| 0          | 0.45640414 | 0.602 | 0.231 | 0        | 2 | ZFP36     | Immune/Neutrophils |
| 0          | 0.33616634 | 0.35  | 0.099 | 0        | 2 | IER3      | Immune/Neutrophils |
| 0          | 0.28672537 | 0.246 | 0.065 | 0        | 2 | AREG      | Immune/Neutrophils |
| 0          | 0.4117532  | 0.52  | 0.203 | 0        | 2 | S100A4    | Immune/Neutrophils |
| 0          | 0.24486475 | 0.292 | 0.07  | 0        | 2 | MAFB      | Immune/Neutrophils |
| 1.778E-306 | 0.22561947 | 0.161 | 0.036 | 3.6E-302 | 2 | C15orf48  | Immune/Neutrophils |
| 0          | 0.25227027 | 0.325 | 0.089 | 0        | 2 | COTL1     | Immune/Neutrophils |
| 0          | 0.29154511 | 0.369 | 0.119 | 0        | 2 | NR4A2     | Immune/Neutrophils |
| 0          | 0.28335436 | 0.333 | 0.111 | 0        | 2 | SGK1      | Immune/Neutrophils |
| 0          | 0.59940216 | 0.902 | 0.674 | 0        | 2 | NEAT1     | Immune/Neutrophils |
| 0          | 0.26185138 | 0.349 | 0.114 | 0        | 2 | NFKBIZ    | Immune/Neutrophils |
| 0          | 0.35341461 | 0.563 | 0.25  | 0        | 2 | CST3      | Immune/Neutrophils |
| 0          | 0.28657403 | 0.361 | 0.13  | 0        | 2 | TNFAIP3   | Immune/Neutrophils |
| 0          | 0.21391579 | 0.27  | 0.073 | 0        | 2 | KLF4      | Immune/Neutrophils |
| 0          | 0.55579688 | 0.894 | 0.635 | 0        | 2 | ACTB      | Immune/Neutrophils |
| 0          | 0.20665    | 0.273 | 0.074 | 0        | 2 | MS4A6A    | Immune/Neutrophils |
| 0          | 0.54490938 | 0.95  | 0.68  | 0        | 2 | FTL       | Immune/Neutrophils |

|            |            |       |       |          |   |          |                    |
|------------|------------|-------|-------|----------|---|----------|--------------------|
| 0          | 0.32541089 | 0.502 | 0.215 | 0        | 2 | SH3BGRL3 | Immune/Neutrophils |
| 0          | 0.34888632 | 0.479 | 0.227 | 0        | 2 | HSPA1A   | Immune/Neutrophils |
| 0          | 0.20472605 | 0.285 | 0.085 | 0        | 2 | TYMP     | Immune/Neutrophils |
| 0          | 0.32539038 | 0.556 | 0.265 | 0        | 2 | CYBA     | Immune/Neutrophils |
| 5.545E-267 | 0.36265642 | 0.49  | 0.261 | 1.1E-262 | 2 | HSPA1B   | Immune/Neutrophils |
| 0          | 0.21855316 | 0.299 | 0.098 | 0        | 2 | SOCS3    | Immune/Neutrophils |
| 0          | 0.33622461 | 0.642 | 0.332 | 0        | 2 | CD74     | Immune/Neutrophils |
| 0          | 0.22080169 | 0.35  | 0.129 | 0        | 2 | GLUL     | Immune/Neutrophils |
| 1.831E-286 | 0.23460217 | 0.37  | 0.15  | 3.7E-282 | 2 | HLA-DPB1 | Immune/Neutrophils |
| 9.909E-273 | 0.28280646 | 0.484 | 0.242 | 2E-268   | 2 | FOSB     | Immune/Neutrophils |
| 1.663E-289 | 0.21485751 | 0.335 | 0.128 | 3.4E-285 | 2 | HLA-DPA1 | Immune/Neutrophils |
| 2.787E-295 | 0.32146149 | 0.612 | 0.358 | 5.6E-291 | 2 | H3F3A    | Immune/Neutrophils |
| 4.57E-299  | 0.30383731 | 0.625 | 0.349 | 9.2E-295 | 2 | PABPC1   | Immune/Neutrophils |
| 6.292E-242 | 0.27792699 | 0.452 | 0.234 | 1.3E-237 | 2 | ZFP36L1  | Immune/Neutrophils |
| 1.069E-260 | 0.2415685  | 0.406 | 0.185 | 2.2E-256 | 2 | GPX1     | Immune/Neutrophils |
| 2.422E-222 | 0.29157049 | 0.504 | 0.284 | 4.9E-218 | 2 | KLF6     | Immune/Neutrophils |
| 6.834E-183 | 0.27517633 | 0.461 | 0.262 | 1.4E-178 | 2 | EGR1     | Immune/Neutrophils |
| 1.106E-260 | 0.23029767 | 0.44  | 0.211 | 2.2E-256 | 2 | OAZ1     | Immune/Neutrophils |
| 4.36E-259  | 0.21496717 | 0.422 | 0.191 | 8.8E-255 | 2 | PSAP     | Immune/Neutrophils |
| 4.784E-263 | 0.23879789 | 0.51  | 0.257 | 9.7E-259 | 2 | LGALS1   | Immune/Neutrophils |
| 3.932E-240 | 0.20022352 | 0.347 | 0.152 | 7.9E-236 | 2 | MCL1     | Immune/Neutrophils |
| 6.736E-119 | 0.21295313 | 0.215 | 0.101 | 1.4E-114 | 2 | CCL4     | Immune/Neutrophils |
| 7.371E-206 | 0.20034551 | 0.392 | 0.19  | 1.5E-201 | 2 | NPC2     | Immune/Neutrophils |
| 1.543E-205 | 0.25805385 | 0.639 | 0.413 | 3.1E-201 | 2 | H3F3B    | Immune/Neutrophils |
| 5.468E-158 | 0.2302117  | 0.591 | 0.396 | 1.1E-153 | 2 | RPS9     | Immune/Neutrophils |
| 1.852E-202 | 0.25822176 | 0.914 | 0.782 | 3.7E-198 | 2 | TMSB10   | Immune/Neutrophils |
| 2.098E-113 | 0.21920904 | 0.616 | 0.45  | 4.2E-109 | 2 | HSP90AA1 | Immune/Neutrophils |
| 2.639E-248 | 0.2673377  | 0.973 | 0.878 | 5.3E-244 | 2 | TMSB4X   | Immune/Neutrophils |
| 7.856E-120 | 0.20732835 | 0.717 | 0.551 | 1.6E-115 | 2 | TPT1     | Immune/Neutrophils |
| 1.038E-191 | 0.24442747 | 0.938 | 0.865 | 2.1E-187 | 2 | RPL39    | Immune/Neutrophils |
| 3.133E-112 | -0.2014618 | 0.039 | 0.169 | 6.3E-108 | 2 | CD24     | Immune/Neutrophils |
| 7.071E-70  | -0.2109628 | 0.026 | 0.111 | 1.43E-65 | 2 | CTGF     | Immune/Neutrophils |
| 1.194E-124 | -0.2995714 | 0.04  | 0.182 | 2.4E-120 | 2 | DEFB1    | Immune/Neutrophils |
| 1.476E-127 | -0.3084297 | 0.039 | 0.182 | 3E-123   | 2 | WFDC2    | Immune/Neutrophils |
| 4.8176E-64 | -0.2685355 | 0.031 | 0.114 | 9.74E-60 | 2 | IGFBP5   | Immune/Neutrophils |
| 1.164E-191 | -0.3208158 | 0.061 | 0.262 | 2.4E-187 | 2 | IGFBP7   | Immune/Neutrophils |
| 5.365E-126 | -0.2223722 | 0.09  | 0.249 | 1.1E-121 | 2 | DSTN     | Immune/Neutrophils |
| 2.146E-130 | -0.3195557 | 0.051 | 0.201 | 4.3E-126 | 2 | CLU      | Immune/Neutrophils |
| 2.472E-133 | -0.2780054 | 0.067 | 0.224 | 5E-129   | 2 | FXYP2    | Immune/Neutrophils |
| 3.029E-151 | -0.3774987 | 0.065 | 0.236 | 6.1E-147 | 2 | ADIRF    | Immune/Neutrophils |
| 6.539E-130 | -0.3366305 | 0.085 | 0.244 | 1.3E-125 | 2 | ATP1B1   | Immune/Neutrophils |
| 7.1732E-29 | -0.2311772 | 0.13  | 0.194 | 1.45E-24 | 2 | MT1X     | Immune/Neutrophils |
| 9.536E-114 | -0.4329377 | 0.124 | 0.279 | 1.9E-109 | 2 | SPP1     | Immune/Neutrophils |
| 2.8454E-54 | -0.2005459 | 0.951 | 0.952 | 5.75E-50 | 2 | MT-ND1   | Immune/Neutrophils |
| 1.4501E-30 | -0.2655114 | 0.293 | 0.363 | 2.93E-26 | 2 | MT2A     | Immune/Neutrophils |
| 3.6381E-77 | -0.2341491 | 0.861 | 0.889 | 7.35E-73 | 2 | MT-ND5   | Immune/Neutrophils |
| 3.3039E-41 | -0.2365159 | 0.781 | 0.794 | 6.68E-37 | 2 | MT-ND4L  | Immune/Neutrophils |
| 1.403E-188 | -0.3388492 | 1     | 0.997 | 2.8E-184 | 2 | MALAT1   | Immune/Neutrophils |

|            |            |       |       |          |   |         |                              |
|------------|------------|-------|-------|----------|---|---------|------------------------------|
| 6.0302E-26 | -0.5370871 | 0.163 | 0.222 | 1.22E-21 | 2 | MT1G    | Immune/Neutrophils           |
| 9.4177E-06 | -1.4754639 | 0.15  | 0.169 | 0.190314 | 2 | IGKC    | Immune/Neutrophils           |
| 0          | 1.10107687 | 0.75  | 0.069 | 0        | 3 | C1QA    | Immune/Monocyte, Macrophages |
| 0          | 0.92465466 | 0.67  | 0.056 | 0        | 3 | C1QB    | Immune/Monocyte, Macrophages |
| 0          | 0.87678721 | 0.485 | 0.045 | 0        | 3 | APOC1   | Immune/Monocyte, Macrophages |
| 0          | 0.75004903 | 0.413 | 0.033 | 0        | 3 | HMOX1   | Immune/Monocyte, Macrophages |
| 0          | 0.47949509 | 0.207 | 0.011 | 0        | 3 | CCL18   | Immune/Monocyte, Macrophages |
| 0          | 0.60927288 | 0.486 | 0.037 | 0        | 3 | LGMN    | Immune/Monocyte, Macrophages |
| 0          | 0.45352601 | 0.428 | 0.025 | 0        | 3 | C1QC    | Immune/Monocyte, Macrophages |
| 0          | 0.46071004 | 0.457 | 0.037 | 0        | 3 | CD163   | Immune/Monocyte, Macrophages |
| 0          | 0.67869882 | 0.595 | 0.082 | 0        | 3 | CTSB    | Immune/Monocyte, Macrophages |
| 0          | 0.97255259 | 0.577 | 0.115 | 0        | 3 | APOE    | Immune/Monocyte, Macrophages |
| 0          | 0.52497652 | 0.491 | 0.054 | 0        | 3 | CTSZ    | Immune/Monocyte, Macrophages |
| 0          | 0.29048313 | 0.295 | 0.018 | 0        | 3 | MS4A4A  | Immune/Monocyte, Macrophages |
| 0          | 0.26392969 | 0.245 | 0.014 | 0        | 3 | PLTP    | Immune/Monocyte, Macrophages |
| 0          | 0.37501112 | 0.371 | 0.032 | 0        | 3 | CD14    | Immune/Monocyte, Macrophages |
| 0          | 0.62291646 | 0.513 | 0.074 | 0        | 3 | RNASE1  | Immune/Monocyte, Macrophages |
| 0          | 0.41988857 | 0.381 | 0.043 | 0        | 3 | CTSL    | Immune/Monocyte, Macrophages |
| 0          | 0.25625431 | 0.23  | 0.016 | 0        | 3 | F13A1   | Immune/Monocyte, Macrophages |
| 0          | 0.24736134 | 0.245 | 0.017 | 0        | 3 | SDC3    | Immune/Monocyte, Macrophages |
| 0          | 0.44125336 | 0.464 | 0.058 | 0        | 3 | MS4A6A  | Immune/Monocyte, Macrophages |
| 0          | 0.59467146 | 0.602 | 0.108 | 0        | 3 | FCER1G  | Immune/Monocyte, Macrophages |
| 0          | 1.07751146 | 0.864 | 0.282 | 0        | 3 | HLA-DRA | Immune/Monocyte, Macrophages |
| 0          | 0.76563714 | 0.715 | 0.166 | 0        | 3 | PSAP    | Immune/Monocyte, Macrophages |
| 0          | 0.6634707  | 0.677 | 0.141 | 0        | 3 | TYROBP  | Immune/Monocyte, Macrophages |
| 0          | 0.34009309 | 0.346 | 0.037 | 0        | 3 | STAB1   | Immune/Monocyte, Macrophages |
| 0          | 0.31485011 | 0.32  | 0.032 | 0        | 3 | CFD     | Immune/Monocyte, Macrophages |
| 0          | 0.58388644 | 0.58  | 0.11  | 0        | 3 | GLUL    | Immune/Monocyte, Macrophages |
| 0          | 0.33546459 | 0.253 | 0.029 | 0        | 3 | SLC40A1 | Immune/Monocyte, Macrophages |
| 0          | 0.26671638 | 0.241 | 0.022 | 0        | 3 | GPNMB   | Immune/Monocyte, Macrophages |
| 0          | 0.48520557 | 0.536 | 0.095 | 0        | 3 | CTSS    | Immune/Monocyte, Macrophages |
| 0          | 0.2866605  | 0.314 | 0.033 | 0        | 3 | FCGR3A  | Immune/Monocyte, Macrophages |
| 0          | 0.61375969 | 0.662 | 0.151 | 0        | 3 | AIF1    | Immune/Monocyte, Macrophages |
| 0          | 0.69829607 | 0.628 | 0.167 | 0        | 3 | CTSD    | Immune/Monocyte, Macrophages |
| 0          | 1.79233714 | 0.99  | 0.677 | 0        | 3 | FTL     | Immune/Monocyte, Macrophages |
| 0          | 0.21914246 | 0.236 | 0.02  | 0        | 3 | FPR3    | Immune/Monocyte, Macrophages |
| 0          | 0.30303973 | 0.289 | 0.035 | 0        | 3 | MSR1    | Immune/Monocyte, Macrophages |
| 0          | 0.61953496 | 0.668 | 0.167 | 0        | 3 | NPC2    | Immune/Monocyte, Macrophages |
| 0          | 0.5154211  | 0.426 | 0.091 | 0        | 3 | SEPP1   | Immune/Monocyte, Macrophages |
| 0          | 0.30663959 | 0.322 | 0.043 | 0        | 3 | LIPA    | Immune/Monocyte, Macrophages |
| 0          | 0.23788728 | 0.16  | 0.017 | 0        | 3 | CXCL9   | Immune/Monocyte, Macrophages |
| 0          | 0.54963608 | 0.496 | 0.122 | 0        | 3 | LYZ     | Immune/Monocyte, Macrophages |
| 0          | 0.85515839 | 0.815 | 0.318 | 0        | 3 | CD74    | Immune/Monocyte, Macrophages |
| 0          | 0.33427028 | 0.377 | 0.06  | 0        | 3 | GRN     | Immune/Monocyte, Macrophages |
| 0          | 0.21074594 | 0.237 | 0.024 | 0        | 3 | CREG1   | Immune/Monocyte, Macrophages |
| 0          | 0.32344102 | 0.361 | 0.061 | 0        | 3 | CTSC    | Immune/Monocyte, Macrophages |
| 0          | 0.3165946  | 0.368 | 0.064 | 0        | 3 | MAFB    | Immune/Monocyte, Macrophages |
| 0          | 0.33965303 | 0.397 | 0.075 | 0        | 3 | LY96    | Immune/Monocyte, Macrophages |

|            |            |       |       |          |   |           |                              |
|------------|------------|-------|-------|----------|---|-----------|------------------------------|
| 0          | 0.36519698 | 0.447 | 0.095 | 0        | 3 | MARCKS    | Immune/Monocyte, Macrophages |
| 0          | 0.44005405 | 0.534 | 0.137 | 0        | 3 | HLA-DPB1  | Immune/Monocyte, Macrophages |
| 0          | 0.23604113 | 0.259 | 0.036 | 0        | 3 | MS4A7     | Immune/Monocyte, Macrophages |
| 0          | 0.24230016 | 0.28  | 0.043 | 0        | 3 | CYBB      | Immune/Monocyte, Macrophages |
| 0          | 0.38407831 | 0.468 | 0.117 | 0        | 3 | HLA-DPA1  | Immune/Monocyte, Macrophages |
| 0          | 0.29862718 | 0.363 | 0.071 | 0        | 3 | LAPTM5    | Immune/Monocyte, Macrophages |
| 0          | 0.52895007 | 0.676 | 0.242 | 0        | 3 | CST3      | Immune/Monocyte, Macrophages |
| 0          | 0.35750557 | 0.454 | 0.111 | 0        | 3 | SDCBP     | Immune/Monocyte, Macrophages |
| 0          | 0.39129129 | 0.39  | 0.106 | 0        | 3 | CXCL2     | Immune/Monocyte, Macrophages |
| 0          | 0.20865696 | 0.25  | 0.038 | 0        | 3 | MFSD1     | Immune/Monocyte, Macrophages |
| 0          | 0.42269788 | 0.548 | 0.173 | 0        | 3 | GPX1      | Immune/Monocyte, Macrophages |
| 0          | 0.6211568  | 0.82  | 0.381 | 0        | 3 | SAT1      | Immune/Monocyte, Macrophages |
| 0          | 0.79562478 | 0.888 | 0.539 | 0        | 3 | FTH1      | Immune/Monocyte, Macrophages |
| 0          | 0.25615921 | 0.327 | 0.066 | 0        | 3 | S100A9    | Immune/Monocyte, Macrophages |
| 0          | 0.22659461 | 0.276 | 0.054 | 0        | 3 | FCGRT     | Immune/Monocyte, Macrophages |
| 0          | 0.23945808 | 0.221 | 0.048 | 0        | 3 | CXCL3     | Immune/Monocyte, Macrophages |
| 0          | 0.25865975 | 0.248 | 0.059 | 0        | 3 | CXCL8     | Immune/Monocyte, Macrophages |
| 0          | 0.3080937  | 0.345 | 0.101 | 0        | 3 | IER3      | Immune/Monocyte, Macrophages |
| 0          | 0.42025112 | 0.646 | 0.261 | 0        | 3 | SRGN      | Immune/Monocyte, Macrophages |
| 0          | 0.44821529 | 0.518 | 0.224 | 0        | 3 | HSPA1A    | Immune/Monocyte, Macrophages |
| 0          | 0.41439124 | 0.616 | 0.261 | 0        | 3 | CYBA      | Immune/Monocyte, Macrophages |
| 0          | 0.25416266 | 0.245 | 0.067 | 0        | 3 | FABP5     | Immune/Monocyte, Macrophages |
| 0          | 0.22340105 | 0.291 | 0.07  | 0        | 3 | ASAH1     | Immune/Monocyte, Macrophages |
| 0          | 0.23958826 | 0.318 | 0.083 | 0        | 3 | TYMP      | Immune/Monocyte, Macrophages |
| 0          | 0.58794684 | 0.862 | 0.559 | 0        | 3 | FOS       | Immune/Monocyte, Macrophages |
| 9.856E-200 | 0.29038079 | 0.191 | 0.064 | 2E-195   | 3 | CCL2      | Immune/Monocyte, Macrophages |
| 0          | 0.24990995 | 0.265 | 0.078 | 0        | 3 | 11-1143G9 | Immune/Monocyte, Macrophages |
| 0          | 0.43904716 | 0.682 | 0.362 | 0        | 3 | DUSP1     | Immune/Monocyte, Macrophages |
| 0          | 0.3187167  | 0.513 | 0.205 | 0        | 3 | OAZ1      | Immune/Monocyte, Macrophages |
| 0          | 0.55416676 | 0.877 | 0.637 | 0        | 3 | ACTB      | Immune/Monocyte, Macrophages |
| 0          | 0.2409192  | 0.356 | 0.115 | 0        | 3 | VAMP8     | Immune/Monocyte, Macrophages |
| 0          | 0.22652367 | 0.302 | 0.093 | 0        | 3 | STAT1     | Immune/Monocyte, Macrophages |
| 0          | 0.25883889 | 0.389 | 0.14  | 0        | 3 | HLA-DRB1  | Immune/Monocyte, Macrophages |
| 0          | 0.21783162 | 0.299 | 0.093 | 0        | 3 | CCL3      | Immune/Monocyte, Macrophages |
| 0          | 0.56421155 | 0.947 | 0.78  | 0        | 3 | TMSB10    | Immune/Monocyte, Macrophages |
| 0          | 0.26077359 | 0.362 | 0.138 | 0        | 3 | PRDX1     | Immune/Monocyte, Macrophages |
| 0          | 0.22573107 | 0.336 | 0.114 | 0        | 3 | NAMPT     | Immune/Monocyte, Macrophages |
| 0          | 0.24064728 | 0.334 | 0.123 | 0        | 3 | NR4A2     | Immune/Monocyte, Macrophages |
| 0          | 0.21493704 | 0.309 | 0.104 | 0        | 3 | HLA-DRB5  | Immune/Monocyte, Macrophages |
| 1.121E-276 | 0.31636529 | 0.514 | 0.258 | 2.3E-272 | 3 | LGALS1    | Immune/Monocyte, Macrophages |
| 2.35E-290  | 0.22276615 | 0.312 | 0.113 | 4.7E-286 | 3 | SGK1      | Immune/Monocyte, Macrophages |
| 1.242E-284 | 0.2959835  | 0.495 | 0.242 | 2.5E-280 | 3 | ZFP36     | Immune/Monocyte, Macrophages |
| 0          | 0.51973136 | 0.978 | 0.878 | 0        | 3 | TMSB4X    | Immune/Monocyte, Macrophages |
| 1.256E-301 | 0.27372771 | 0.486 | 0.23  | 2.5E-297 | 3 | HLA-A     | Immune/Monocyte, Macrophages |
| 2.013E-274 | 0.24989566 | 0.423 | 0.192 | 4.1E-270 | 3 | CD63      | Immune/Monocyte, Macrophages |
| 2.284E-272 | 0.20557086 | 0.318 | 0.12  | 4.6E-268 | 3 | SOD2      | Immune/Monocyte, Macrophages |
| 2.284E-272 | 0.20557086 | 0.318 | 0.12  | 4.6E-268 | 3 | SOD2      | Immune/Monocyte, Macrophages |
| 6.552E-266 | 0.28853327 | 0.591 | 0.338 | 1.3E-261 | 3 | HLA-B     | Immune/Monocyte, Macrophages |

|            |            |       |       |          |   |         |                              |
|------------|------------|-------|-------|----------|---|---------|------------------------------|
| 2.326E-213 | 0.26390229 | 0.462 | 0.245 | 4.7E-209 | 3 | FOSB    | Immune/Monocyte, Macrophages |
| 4.96E-177  | 0.27820733 | 0.46  | 0.263 | 1E-172   | 3 | EGR1    | Immune/Monocyte, Macrophages |
| 1.023E-214 | 0.25031631 | 0.45  | 0.235 | 2.1E-210 | 3 | ZFP36L1 | Immune/Monocyte, Macrophages |
| 0          | 0.45126426 | 0.991 | 0.952 | 0        | 3 | B2M     | Immune/Monocyte, Macrophages |
| 1.304E-181 | 0.22819231 | 0.398 | 0.206 | 2.6E-177 | 3 | NFKBIA  | Immune/Monocyte, Macrophages |
| 1.342E-157 | 0.22973967 | 0.483 | 0.287 | 2.7E-153 | 3 | KLF6    | Immune/Monocyte, Macrophages |
| 1.555E-169 | 0.20198755 | 0.416 | 0.222 | 3.1E-165 | 3 | S100A11 | Immune/Monocyte, Macrophages |
| 4.527E-189 | 0.26124169 | 0.763 | 0.559 | 9.1E-185 | 3 | ATP5E   | Immune/Monocyte, Macrophages |
| 7.178E-99  | 0.20374142 | 0.419 | 0.268 | 1.45E-94 | 3 | HSPA1B  | Immune/Monocyte, Macrophages |
| 6.478E-145 | 0.25368225 | 0.825 | 0.681 | 1.3E-140 | 3 | NEAT1   | Immune/Monocyte, Macrophages |
| 6.112E-116 | -0.2100251 | 0.034 | 0.169 | 1.2E-111 | 3 | CD24    | Immune/Monocyte, Macrophages |
| 1.468E-118 | -0.292021  | 0.04  | 0.182 | 3E-114   | 3 | WFDC2   | Immune/Monocyte, Macrophages |
| 4.382E-192 | -0.3216289 | 0.055 | 0.262 | 8.9E-188 | 3 | IGFBP7  | Immune/Monocyte, Macrophages |
| 4.558E-147 | -0.2874028 | 0.054 | 0.225 | 9.2E-143 | 3 | FXD2    | Immune/Monocyte, Macrophages |
| 2.2875E-63 | -0.2660433 | 0.03  | 0.114 | 4.62E-59 | 3 | IGFBP5  | Immune/Monocyte, Macrophages |
| 1.801E-134 | -0.3218512 | 0.044 | 0.201 | 3.6E-130 | 3 | CLU     | Immune/Monocyte, Macrophages |
| 6.071E-114 | -0.2998731 | 0.044 | 0.181 | 1.2E-109 | 3 | DEFB1   | Immune/Monocyte, Macrophages |
| 7.145E-110 | -0.2152945 | 0.097 | 0.247 | 1.4E-105 | 3 | DSTN    | Immune/Monocyte, Macrophages |
| 1.975E-156 | -0.385241  | 0.057 | 0.236 | 4E-152   | 3 | ADIRF   | Immune/Monocyte, Macrophages |
| 2.661E-96  | -0.3153136 | 0.106 | 0.241 | 5.38E-92 | 3 | ATP1B1  | Immune/Monocyte, Macrophages |
| 1.4285E-93 | -0.2135318 | 0.313 | 0.459 | 2.89E-89 | 3 | RPL6    | Immune/Monocyte, Macrophages |
| 1.7334E-87 | -0.2197779 | 0.329 | 0.46  | 3.5E-83  | 3 | RPS4X   | Immune/Monocyte, Macrophages |
| 1.1766E-98 | -0.2289617 | 0.367 | 0.506 | 2.38E-94 | 3 | RPL7    | Immune/Monocyte, Macrophages |
| 3.5036E-73 | -0.204808  | 0.454 | 0.556 | 7.08E-69 | 3 | RPL11   | Immune/Monocyte, Macrophages |
| 9.597E-87  | -0.2222845 | 0.407 | 0.53  | 1.94E-82 | 3 | RPL35A  | Immune/Monocyte, Macrophages |
| 1.349E-125 | -0.2676135 | 0.318 | 0.484 | 2.7E-121 | 3 | RPL3    | Immune/Monocyte, Macrophages |
| 8.0098E-59 | -0.2045457 | 0.488 | 0.562 | 1.62E-54 | 3 | RPL18A  | Immune/Monocyte, Macrophages |
| 2.0262E-77 | -0.2192319 | 0.454 | 0.556 | 4.09E-73 | 3 | RPL23A  | Immune/Monocyte, Macrophages |
| 1.9975E-55 | -0.2058282 | 0.548 | 0.605 | 4.04E-51 | 3 | RPS15A  | Immune/Monocyte, Macrophages |
| 1.8863E-84 | -0.2091485 | 0.708 | 0.777 | 3.81E-80 | 3 | RPS27A  | Immune/Monocyte, Macrophages |
| 2.732E-32  | -0.2217674 | 0.399 | 0.46  | 5.52E-28 | 3 | S100A6  | Immune/Monocyte, Macrophages |
| 2.6492E-65 | -0.2111698 | 0.859 | 0.889 | 5.35E-61 | 3 | MT-ND5  | Immune/Monocyte, Macrophages |
| 8.982E-78  | -0.2242515 | 0.748 | 0.808 | 1.82E-73 | 3 | RPS19   | Immune/Monocyte, Macrophages |
| 1.093E-122 | -0.2458749 | 0.61  | 0.721 | 2.2E-118 | 3 | RPS14   | Immune/Monocyte, Macrophages |
| 2.1085E-90 | -0.2334704 | 0.718 | 0.791 | 4.26E-86 | 3 | RPL10   | Immune/Monocyte, Macrophages |
| 5.231E-114 | -0.2433389 | 0.709 | 0.802 | 1.1E-109 | 3 | RPL13A  | Immune/Monocyte, Macrophages |
| 5.685E-119 | -0.2478952 | 0.742 | 0.828 | 1.1E-114 | 3 | RPL13   | Immune/Monocyte, Macrophages |
| 4.789E-163 | -0.3208932 | 0.446 | 0.608 | 9.7E-159 | 3 | RPS6    | Immune/Monocyte, Macrophages |
| 2.214E-133 | -0.2870497 | 0.579 | 0.703 | 4.5E-129 | 3 | RPS8    | Immune/Monocyte, Macrophages |
| 3.722E-167 | -0.2655931 | 0.79  | 0.881 | 7.5E-163 | 3 | RPL41   | Immune/Monocyte, Macrophages |
| 1.18E-157  | -0.293599  | 0.652 | 0.774 | 2.4E-153 | 3 | RPL32   | Immune/Monocyte, Macrophages |
| 3.2796E-60 | -0.2615153 | 0.757 | 0.796 | 6.63E-56 | 3 | MT-ND4L | Immune/Monocyte, Macrophages |
| 3.88E-151  | -0.2789823 | 0.84  | 0.913 | 7.8E-147 | 3 | RPL21   | Immune/Monocyte, Macrophages |
| 2.411E-205 | -0.3525118 | 0.697 | 0.824 | 4.9E-201 | 3 | RPS18   | Immune/Monocyte, Macrophages |
| 3.848E-228 | -0.3429414 | 0.888 | 0.951 | 7.8E-224 | 3 | RPS27   | Immune/Monocyte, Macrophages |
| 1.318E-252 | -0.3571988 | 0.888 | 0.952 | 2.7E-248 | 3 | RPL34   | Immune/Monocyte, Macrophages |
| 3.7702E-18 | -0.4758373 | 0.171 | 0.221 | 7.62E-14 | 3 | MT1G    | Immune/Monocyte, Macrophages |
| 0          | -0.5879686 | 0.998 | 0.997 | 0        | 3 | MALAT1  | Immune/Monocyte, Macrophages |

|            |            |       |       |          |   |          |                              |
|------------|------------|-------|-------|----------|---|----------|------------------------------|
| 0.00027977 | -1.4260162 | 0.154 | 0.169 | 1        | 3 | IGKC     | Immune/Monocyte, Macrophages |
| 0          | 1.20223793 | 0.649 | 0.052 | 0        | 4 | MT1H     | Proximal Tubule              |
| 0          | 2.33996953 | 0.914 | 0.175 | 0        | 4 | MT1G     | Proximal Tubule              |
| 0          | 0.79667881 | 0.525 | 0.049 | 0        | 4 | MT1F     | Proximal Tubule              |
| 0          | 1.41294426 | 0.738 | 0.156 | 0        | 4 | MT1X     | Proximal Tubule              |
| 0          | 0.5642171  | 0.379 | 0.041 | 0        | 4 | PIGR     | Proximal Tubule              |
| 0          | 0.81718313 | 0.543 | 0.092 | 0        | 4 | MT1E     | Proximal Tubule              |
| 0          | 0.26939728 | 0.26  | 0.017 | 0        | 4 | ACSM2A   | Proximal Tubule              |
| 0          | 1.07495019 | 0.564 | 0.166 | 0        | 4 | CLU      | Proximal Tubule              |
| 0          | 0.38667152 | 0.233 | 0.025 | 0        | 4 | MT1M     | Proximal Tubule              |
| 0          | 0.51573673 | 0.317 | 0.059 | 0        | 4 | MMP7     | Proximal Tubule              |
| 0          | 0.50644259 | 0.412 | 0.076 | 0        | 4 | CRYAB    | Proximal Tubule              |
| 0          | 0.40143524 | 0.368 | 0.058 | 0        | 4 | GATM     | Proximal Tubule              |
| 0          | 1.07787245 | 0.758 | 0.334 | 0        | 4 | MT2A     | Proximal Tubule              |
| 0          | 0.27000585 | 0.266 | 0.038 | 0        | 4 | MGST1    | Proximal Tubule              |
| 0          | 0.2032233  | 0.219 | 0.028 | 0        | 4 | LGALS2   | Proximal Tubule              |
| 0          | 0.23784807 | 0.235 | 0.037 | 0        | 4 | VCAM1    | Proximal Tubule              |
| 0          | 0.22276851 | 0.247 | 0.04  | 0        | 4 | C11orf54 | Proximal Tubule              |
| 0          | 0.26334781 | 0.274 | 0.053 | 0        | 4 | PDZK1P1  | Proximal Tubule              |
| 0          | 0.54615445 | 0.49  | 0.206 | 0        | 4 | ADIRF    | Proximal Tubule              |
| 0          | 0.30132468 | 0.364 | 0.088 | 0        | 4 | CXCL14   | Proximal Tubule              |
| 0          | 0.39396674 | 0.444 | 0.141 | 0        | 4 | CD24     | Proximal Tubule              |
| 0          | 0.39942236 | 0.554 | 0.19  | 0        | 4 | FXD2     | Proximal Tubule              |
| 0          | 0.25979686 | 0.307 | 0.078 | 0        | 4 | EMX2     | Proximal Tubule              |
| 1.841E-168 | 0.20078809 | 0.312 | 0.126 | 3.7E-164 | 4 | GPX3     | Proximal Tubule              |
| 6.7E-154   | 0.21637785 | 0.36  | 0.168 | 1.4E-149 | 4 | TXN      | Proximal Tubule              |
| 1.315E-154 | 0.20916253 | 0.371 | 0.176 | 2.7E-150 | 4 | LAPTM4A  | Proximal Tubule              |
| 5.754E-128 | 0.27297217 | 0.596 | 0.401 | 1.2E-123 | 4 | ITM2B    | Proximal Tubule              |
| 1.6385E-55 | -0.2072492 | 0.081 | 0.199 | 3.31E-51 | 4 | AIF1     | Proximal Tubule              |
| 1.2109E-67 | -0.2054389 | 0.098 | 0.238 | 2.45E-63 | 4 | S100A4   | Proximal Tubule              |
| 2.5055E-51 | -0.2738167 | 0.054 | 0.158 | 5.06E-47 | 4 | LYZ      | Proximal Tubule              |
| 1.554E-102 | -0.272708  | 0.115 | 0.303 | 3.14E-98 | 4 | SRGN     | Proximal Tubule              |
| 1.1689E-18 | -0.2093445 | 0.058 | 0.11  | 2.36E-14 | 4 | IGFBP5   | Proximal Tubule              |
| 4.7907E-72 | -0.2974058 | 0.135 | 0.287 | 9.68E-68 | 4 | LGALS1   | Proximal Tubule              |
| 1.0643E-28 | -0.210111  | 0.276 | 0.363 | 2.15E-24 | 4 | CD74     | Proximal Tubule              |
| 1.0742E-36 | -0.2189485 | 0.321 | 0.422 | 2.17E-32 | 4 | SAT1     | Proximal Tubule              |
| 5.8084E-42 | -0.2375347 | 0.288 | 0.394 | 1.17E-37 | 4 | DUSP1    | Proximal Tubule              |
| 4.2249E-49 | -0.3332673 | 0.214 | 0.336 | 8.54E-45 | 4 | HLA-DRA  | Proximal Tubule              |
| 1.0376E-50 | -0.278205  | 0.588 | 0.661 | 2.1E-46  | 4 | ACTB     | Proximal Tubule              |
| 7.4208E-88 | -0.4043195 | 0.448 | 0.591 | 1.5E-83  | 4 | FOS      | Proximal Tubule              |
| 1.59E-106  | -0.3679933 | 0.925 | 0.957 | 3.2E-102 | 4 | B2M      | Proximal Tubule              |
| 5.082E-186 | -0.472023  | 0.795 | 0.892 | 1E-181   | 4 | TMSB4X   | Proximal Tubule              |
| 6.281E-15  | -1.409831  | 0.117 | 0.171 | 1.27E-10 | 4 | IGKC     | Proximal Tubule              |
| 0          | 0.5619503  | 0.56  | 0.213 | 0        | 5 | ATP1B1   | Mixed Markers                |
| 0          | 0.23672296 | 0.223 | 0.04  | 0        | 5 | ADGRF5   | Mixed Markers                |
| 0          | 0.37366606 | 0.492 | 0.141 | 0        | 5 | CD24     | Mixed Markers                |
| 0          | 0.24384009 | 0.223 | 0.042 | 0        | 5 | TACSTD2  | Mixed Markers                |
| 0          | 0.29044481 | 0.343 | 0.078 | 0        | 5 | EMX2     | Mixed Markers                |

|            |            |       |       |          |   |          |                      |
|------------|------------|-------|-------|----------|---|----------|----------------------|
| 0          | 0.27200755 | 0.311 | 0.07  | 0        | 5 | C12orf75 | Mixed Markers        |
| 0          | 0.29796735 | 0.298 | 0.075 | 0        | 5 | SOX4     | Mixed Markers        |
| 0          | 0.38945679 | 0.553 | 0.193 | 0        | 5 | FXD2     | Mixed Markers        |
| 2.448E-170 | 0.29687718 | 0.25  | 0.086 | 4.9E-166 | 5 | CRYAB    | Mixed Markers        |
| 7.993E-302 | 0.20091759 | 0.271 | 0.066 | 1.6E-297 | 5 | SMIM24   | Mixed Markers        |
| 5.662E-219 | 0.28599877 | 0.365 | 0.143 | 1.1E-214 | 5 | RTN4     | Mixed Markers        |
| 1.442E-218 | 0.27183624 | 0.359 | 0.135 | 2.9E-214 | 5 | CD9      | Mixed Markers        |
| 2.503E-202 | 0.2069798  | 0.238 | 0.072 | 5.1E-198 | 5 | ATP6AP2  | Mixed Markers        |
| 1.409E-152 | 0.2695067  | 0.37  | 0.16  | 2.8E-148 | 5 | DEFB1    | Mixed Markers        |
| 5.129E-169 | 0.24984748 | 0.382 | 0.159 | 1E-164   | 5 | WFDC2    | Mixed Markers        |
| 6.972E-128 | 0.24033551 | 0.492 | 0.281 | 1.4E-123 | 5 | NDUFA4   | Mixed Markers        |
| 8.586E-106 | 0.20911371 | 0.381 | 0.2   | 1.7E-101 | 5 | HSPB1    | Mixed Markers        |
| 1.055E-105 | 0.2069187  | 0.384 | 0.207 | 2.1E-101 | 5 | COX7B    | Mixed Markers        |
| 3.4194E-60 | 0.2024256  | 0.27  | 0.149 | 6.91E-56 | 5 | HES1     | Mixed Markers        |
| 1.322E-106 | 0.23020657 | 0.564 | 0.366 | 2.7E-102 | 5 | COX7C    | Mixed Markers        |
| 6.415E-124 | 0.22641847 | 1     | 1     | 1.3E-119 | 5 | MT-CO1   | Mixed Markers        |
| 1.43E-46   | -0.20488   | 0.023 | 0.114 | 2.89E-42 | 5 | CCL3     | Mixed Markers        |
| 2.2449E-68 | -0.2070892 | 0.043 | 0.176 | 4.54E-64 | 5 | HLA-DPB1 | Mixed Markers        |
| 7.4163E-51 | -0.2353874 | 0.029 | 0.129 | 1.5E-46  | 5 | C1QA     | Mixed Markers        |
| 5.8671E-84 | -0.2563202 | 0.04  | 0.192 | 1.19E-79 | 5 | TYROBP   | Mixed Markers        |
| 2.1591E-89 | -0.2715922 | 0.04  | 0.2   | 4.36E-85 | 5 | AIF1     | Mixed Markers        |
| 1.8497E-69 | -0.3241179 | 0.03  | 0.158 | 3.74E-65 | 5 | LYZ      | Mixed Markers        |
| 2.6871E-56 | -0.2194119 | 0.047 | 0.163 | 5.43E-52 | 5 | CCL5     | Mixed Markers        |
| 3.177E-159 | -0.3585277 | 0.055 | 0.305 | 6.4E-155 | 5 | SRGN     | Mixed Markers        |
| 1.0283E-72 | -0.2219594 | 0.074 | 0.224 | 2.08E-68 | 5 | CXCR4    | Mixed Markers        |
| 1.0585E-81 | -0.237452  | 0.075 | 0.238 | 2.14E-77 | 5 | S100A4   | Mixed Markers        |
| 5.1893E-38 | -0.2547796 | 0.054 | 0.145 | 1.05E-33 | 5 | TIMP1    | Mixed Markers        |
| 1.8266E-89 | -0.3293825 | 0.105 | 0.288 | 3.69E-85 | 5 | LGALS1   | Mixed Markers        |
| 3.9394E-62 | -0.2320714 | 0.227 | 0.38  | 7.96E-58 | 5 | PABPC1   | Mixed Markers        |
| 3.1197E-48 | -0.2550713 | 0.268 | 0.394 | 6.3E-44  | 5 | DUSP1    | Mixed Markers        |
| 2.0838E-39 | -0.2020175 | 0.773 | 0.805 | 4.21E-35 | 5 | RPS19    | Mixed Markers        |
| 3.688E-83  | -0.3772358 | 0.196 | 0.367 | 7.45E-79 | 5 | CD74     | Mixed Markers        |
| 1.0296E-63 | -0.2404413 | 0.7   | 0.798 | 2.08E-59 | 5 | TMSB10   | Mixed Markers        |
| 4.6519E-05 | -0.2052071 | 0.589 | 0.566 | 0.940057 | 5 | FTH1     | Mixed Markers        |
| 3.8262E-06 | -0.2363127 | 0.332 | 0.359 | 0.07732  | 5 | MT2A     | Mixed Markers        |
| 4.9311E-49 | -0.2850023 | 0.583 | 0.661 | 9.96E-45 | 5 | ACTB     | Mixed Markers        |
| 1.647E-100 | -0.5772066 | 0.152 | 0.338 | 3.33E-96 | 5 | HLA-DRA  | Mixed Markers        |
| 6.252E-135 | -0.4408931 | 0.919 | 0.957 | 1.3E-130 | 5 | B2M      | Mixed Markers        |
| 5.473E-165 | -0.4860034 | 0.808 | 0.891 | 1.1E-160 | 5 | TMSB4X   | Mixed Markers        |
| 7.578E-109 | -0.8128805 | 0.584 | 0.709 | 1.5E-104 | 5 | FTL      | Mixed Markers        |
| 1.9686E-23 | -1.5211132 | 0.099 | 0.171 | 3.98E-19 | 5 | IGKC     | Mixed Markers        |
| 0          | 1.92845944 | 0.977 | 0.035 | 0        | 6 | UMOD     | Thick Ascending Limb |
| 0          | 1.27594517 | 0.734 | 0.032 | 0        | 6 | SLC12A1  | Thick Ascending Limb |
| 0          | 0.27511329 | 0.26  | 0.003 | 0        | 6 | EGF      | Thick Ascending Limb |
| 0          | 0.41737429 | 0.409 | 0.014 | 0        | 6 | KNG1     | Thick Ascending Limb |
| 0          | 0.2604522  | 0.271 | 0.011 | 0        | 6 | HSPA2    | Thick Ascending Limb |
| 0          | 0.23452966 | 0.206 | 0.008 | 0        | 6 | CLDN16   | Thick Ascending Limb |
| 0          | 0.87057294 | 0.736 | 0.149 | 0        | 6 | DEFB1    | Thick Ascending Limb |

|            |            |       |       |          |   |          |                      |
|------------|------------|-------|-------|----------|---|----------|----------------------|
| 0          | 0.86833643 | 0.768 | 0.21  | 0        | 6 | ATP1B1   | Thick Ascending Limb |
| 0          | 0.2068284  | 0.22  | 0.015 | 0        | 6 | PTGER3   | Thick Ascending Limb |
| 0          | 0.21025183 | 0.235 | 0.018 | 0        | 6 | MTURN    | Thick Ascending Limb |
| 0          | 0.24313541 | 0.269 | 0.024 | 0        | 6 | RHOBTB3  | Thick Ascending Limb |
| 0          | 0.56280521 | 0.6   | 0.142 | 0        | 6 | CD24     | Thick Ascending Limb |
| 0          | 0.24316268 | 0.273 | 0.028 | 0        | 6 | CYFIP2   | Thick Ascending Limb |
| 0          | 0.30754362 | 0.348 | 0.051 | 0        | 6 | NUDT4    | Thick Ascending Limb |
| 0          | 0.39612394 | 0.475 | 0.097 | 0        | 6 | ATP1A1   | Thick Ascending Limb |
| 0          | 0.56529046 | 0.635 | 0.195 | 0        | 6 | FXYD2    | Thick Ascending Limb |
| 0          | 0.2816405  | 0.31  | 0.048 | 0        | 6 | SLC5A3   | Thick Ascending Limb |
| 0          | 0.20216391 | 0.221 | 0.025 | 0        | 6 | CLDN10   | Thick Ascending Limb |
| 0          | 0.22776863 | 0.261 | 0.034 | 0        | 6 | CKB      | Thick Ascending Limb |
| 0          | 0.3311412  | 0.355 | 0.075 | 0        | 6 | PDK4     | Thick Ascending Limb |
| 5.59E-233  | 0.26991834 | 0.196 | 0.037 | 1.1E-228 | 6 | TMEM52B  | Thick Ascending Limb |
| 0          | 0.33412459 | 0.424 | 0.107 | 0        | 6 | PEBP1    | Thick Ascending Limb |
| 0          | 0.21910667 | 0.264 | 0.047 | 0        | 6 | MRPS6    | Thick Ascending Limb |
| 1.135E-282 | 0.30222817 | 0.4   | 0.118 | 2.3E-278 | 6 | ZFAND5   | Thick Ascending Limb |
| 1.955E-259 | 0.32883934 | 0.637 | 0.253 | 4E-255   | 6 | SPP1     | Thick Ascending Limb |
| 5.375E-224 | 0.25639025 | 0.366 | 0.116 | 1.1E-219 | 6 | LDHB     | Thick Ascending Limb |
| 3.979E-212 | 0.25851823 | 0.381 | 0.127 | 8E-208   | 6 | APP      | Thick Ascending Limb |
| 5.689E-175 | 0.23026095 | 0.36  | 0.129 | 1.1E-170 | 6 | NGFRAP1  | Thick Ascending Limb |
| 0          | 0.53384226 | 1     | 1     | 0        | 6 | MT-CO3   | Thick Ascending Limb |
| 1.815E-281 | 0.5146958  | 1     | 0.998 | 3.7E-277 | 6 | MT-ND3   | Thick Ascending Limb |
| 0          | 0.51065137 | 1     | 0.996 | 0        | 6 | MT-ND2   | Thick Ascending Limb |
| 5.268E-307 | 0.45981648 | 0.997 | 0.95  | 1.1E-302 | 6 | MT-ND1   | Thick Ascending Limb |
| 0          | 0.47321777 | 1     | 1     | 0        | 6 | MT-CO1   | Thick Ascending Limb |
| 3.25E-114  | 0.22008622 | 0.414 | 0.196 | 6.6E-110 | 6 | MTRNR2L8 | Thick Ascending Limb |
| 4.202E-216 | 0.3715936  | 1     | 1     | 8.5E-212 | 6 | MT-ND4   | Thick Ascending Limb |
| 4.404E-280 | 0.36798165 | 1     | 1     | 8.9E-276 | 6 | MT-CO2   | Thick Ascending Limb |
| 8.566E-165 | 0.35394042 | 0.999 | 0.989 | 1.7E-160 | 6 | MT-CYB   | Thick Ascending Limb |
| 1.2472E-74 | 0.21283677 | 0.508 | 0.315 | 2.52E-70 | 6 | UQCRB    | Thick Ascending Limb |
| 8.0697E-75 | 0.22388676 | 0.563 | 0.369 | 1.63E-70 | 6 | COX7C    | Thick Ascending Limb |
| 2.5534E-67 | 0.20726013 | 0.565 | 0.372 | 5.16E-63 | 6 | ATP5I    | Thick Ascending Limb |
| 2.969E-131 | 0.29361765 | 1     | 0.996 | 6E-127   | 6 | MT-ATP6  | Thick Ascending Limb |
| 6.3555E-67 | 0.25850629 | 0.832 | 0.734 | 1.28E-62 | 6 | EEF1A1   | Thick Ascending Limb |
| 3.2259E-77 | 0.21377264 | 0.97  | 0.883 | 6.52E-73 | 6 | MT-ND5   | Thick Ascending Limb |
| 2.8473E-37 | -0.2297389 | 0.028 | 0.127 | 5.75E-33 | 6 | C1QA     | Thick Ascending Limb |
| 1.2891E-60 | -0.2544013 | 0.039 | 0.19  | 2.61E-56 | 6 | TYROBP   | Thick Ascending Limb |
| 9.2898E-34 | -0.2033901 | 0.035 | 0.132 | 1.88E-29 | 6 | CXCL2    | Thick Ascending Limb |
| 8.8166E-70 | -0.2249238 | 0.066 | 0.246 | 1.78E-65 | 6 | SH3BGRL3 | Thick Ascending Limb |
| 2.3113E-83 | -0.2665512 | 0.06  | 0.262 | 4.67E-79 | 6 | VIM      | Thick Ascending Limb |
| 6.8106E-41 | -0.2716279 | 0.033 | 0.144 | 1.38E-36 | 6 | TIMP1    | Thick Ascending Limb |
| 9.7813E-57 | -0.2537496 | 0.049 | 0.198 | 1.98E-52 | 6 | AIF1     | Thick Ascending Limb |
| 1.6497E-64 | -0.2434489 | 0.066 | 0.236 | 3.33E-60 | 6 | S100A4   | Thick Ascending Limb |
| 6.937E-94  | -0.2877963 | 0.074 | 0.298 | 1.4E-89  | 6 | CYBA     | Thick Ascending Limb |
| 2.1413E-45 | -0.3103246 | 0.036 | 0.156 | 4.33E-41 | 6 | LYZ      | Thick Ascending Limb |
| 2.2163E-34 | -0.2064622 | 0.056 | 0.161 | 4.48E-30 | 6 | CCL5     | Thick Ascending Limb |
| 5E-106     | -0.3470182 | 0.064 | 0.301 | 1E-101   | 6 | SRGN     | Thick Ascending Limb |

|            |            |       |       |          |   |          |                      |
|------------|------------|-------|-------|----------|---|----------|----------------------|
| 7.7987E-63 | -0.214776  | 0.118 | 0.298 | 1.58E-58 | 6 | PFN1     | Thick Ascending Limb |
| 3.0661E-51 | -0.2101349 | 0.111 | 0.269 | 6.2E-47  | 6 | FOSB     | Thick Ascending Limb |
| 5.2544E-33 | -0.2570523 | 0.055 | 0.156 | 1.06E-28 | 6 | APOE     | Thick Ascending Limb |
| 5.2342E-94 | -0.2851711 | 0.131 | 0.367 | 1.06E-89 | 6 | HLA-B    | Thick Ascending Limb |
| 1.4801E-13 | -0.2036338 | 0.055 | 0.109 | 2.99E-09 | 6 | IGFBP5   | Thick Ascending Limb |
| 9.3685E-82 | -0.3710196 | 0.08  | 0.286 | 1.89E-77 | 6 | LGALS1   | Thick Ascending Limb |
| 3.1937E-58 | -0.2126474 | 0.177 | 0.358 | 6.45E-54 | 6 | RPL27    | Thick Ascending Limb |
| 3.7128E-32 | -0.2049911 | 0.163 | 0.281 | 7.5E-28  | 6 | CST3     | Thick Ascending Limb |
| 1.3259E-64 | -0.2321494 | 0.219 | 0.415 | 2.68E-60 | 6 | UBA52    | Thick Ascending Limb |
| 7.8158E-85 | -0.3034989 | 0.157 | 0.38  | 1.58E-80 | 6 | PABPC1   | Thick Ascending Limb |
| 7.2018E-74 | -0.2741752 | 0.225 | 0.432 | 1.46E-69 | 6 | RPS3     | Thick Ascending Limb |
| 2.2015E-35 | -0.2013916 | 0.311 | 0.436 | 4.45E-31 | 6 | H3F3B    | Thick Ascending Limb |
| 1.0441E-58 | -0.2363753 | 0.285 | 0.466 | 2.11E-54 | 6 | RPL19    | Thick Ascending Limb |
| 1.1432E-12 | -0.2084    | 0.159 | 0.224 | 2.31E-08 | 6 | ADIRF    | Thick Ascending Limb |
| 3.1378E-39 | -0.2067205 | 0.341 | 0.474 | 6.34E-35 | 6 | RPS13    | Thick Ascending Limb |
| 1.6277E-59 | -0.2486239 | 0.277 | 0.456 | 3.29E-55 | 6 | RPS4X    | Thick Ascending Limb |
| 8.3408E-47 | -0.2185613 | 0.373 | 0.53  | 1.69E-42 | 6 | RPS24    | Thick Ascending Limb |
| 3.368E-103 | -0.4502666 | 0.126 | 0.367 | 6.8E-99  | 6 | CD74     | Thick Ascending Limb |
| 5.0455E-45 | -0.237994  | 0.321 | 0.469 | 1.02E-40 | 6 | HSP90AA1 | Thick Ascending Limb |
| 2.373E-49  | -0.2409699 | 0.323 | 0.476 | 4.8E-45  | 6 | RPL3     | Thick Ascending Limb |
| 3.1905E-69 | -0.2673202 | 0.317 | 0.509 | 6.45E-65 | 6 | RPL27A   | Thick Ascending Limb |
| 2.9688E-68 | -0.2724068 | 0.308 | 0.501 | 6E-64    | 6 | RPS26    | Thick Ascending Limb |
| 1.782E-114 | -0.3761483 | 0.224 | 0.488 | 3.6E-110 | 6 | RPS2     | Thick Ascending Limb |
| 7.4303E-61 | -0.3187136 | 0.217 | 0.394 | 1.5E-56  | 6 | DUSP1    | Thick Ascending Limb |
| 4.1353E-78 | -0.2912578 | 0.323 | 0.527 | 8.36E-74 | 6 | RPL35A   | Thick Ascending Limb |
| 1.006E-67  | -0.2728679 | 0.379 | 0.57  | 2.03E-63 | 6 | RPS25    | Thick Ascending Limb |
| 2.1858E-66 | -0.2742602 | 0.373 | 0.554 | 4.42E-62 | 6 | RPL23A   | Thick Ascending Limb |
| 4.0709E-52 | -0.2561349 | 0.389 | 0.535 | 8.23E-48 | 6 | RPS3A    | Thick Ascending Limb |
| 8.9828E-70 | -0.2814182 | 0.369 | 0.555 | 1.82E-65 | 6 | RPL11    | Thick Ascending Limb |
| 7.2031E-27 | -0.2486973 | 0.319 | 0.42  | 1.46E-22 | 6 | SAT1     | Thick Ascending Limb |
| 1.3942E-52 | -0.2277194 | 0.594 | 0.716 | 2.82E-48 | 6 | RPS14    | Thick Ascending Limb |
| 4.8108E-97 | -0.592826  | 0.108 | 0.337 | 9.72E-93 | 6 | HLA-DRA  | Thick Ascending Limb |
| 1.084E-89  | -0.3163073 | 0.355 | 0.574 | 2.19E-85 | 6 | RPL12    | Thick Ascending Limb |
| 8.9069E-49 | -0.207845  | 0.826 | 0.875 | 1.8E-44  | 6 | RPL41    | Thick Ascending Limb |
| 1.8802E-88 | -0.3009203 | 0.425 | 0.638 | 3.8E-84  | 6 | RPL35    | Thick Ascending Limb |
| 1.6431E-61 | -0.2787702 | 0.44  | 0.6   | 3.32E-57 | 6 | RPS6     | Thick Ascending Limb |
| 3.5287E-70 | -0.2745174 | 0.48  | 0.644 | 7.13E-66 | 6 | RPL36    | Thick Ascending Limb |
| 0.00036465 | -0.2217953 | 0.336 | 0.358 | 1        | 6 | MT2A     | Thick Ascending Limb |
| 1.956E-109 | -0.3677837 | 0.322 | 0.565 | 4E-105   | 6 | RPL18A   | Thick Ascending Limb |
| 3.9826E-89 | -0.3241938 | 0.392 | 0.599 | 8.05E-85 | 6 | RPLP2    | Thick Ascending Limb |
| 1.4097E-57 | -0.2390787 | 0.788 | 0.852 | 2.85E-53 | 6 | RPS29    | Thick Ascending Limb |
| 1.5206E-89 | -0.3302022 | 0.414 | 0.617 | 3.07E-85 | 6 | RPS12    | Thick Ascending Limb |
| 7.7228E-76 | -0.3125987 | 0.423 | 0.591 | 1.56E-71 | 6 | RPL26    | Thick Ascending Limb |
| 1.103E-128 | -0.3964215 | 0.346 | 0.603 | 2.2E-124 | 6 | RPL28    | Thick Ascending Limb |
| 7.9457E-37 | -0.2617401 | 0.623 | 0.696 | 1.61E-32 | 6 | NEAT1    | Thick Ascending Limb |
| 1.328E-139 | -0.4394646 | 0.343 | 0.61  | 2.7E-135 | 6 | RPS15A   | Thick Ascending Limb |
| 1.4945E-82 | -0.2935792 | 0.659 | 0.775 | 3.02E-78 | 6 | RPS27A   | Thick Ascending Limb |
| 7.788E-107 | -0.3707684 | 0.507 | 0.7   | 1.6E-102 | 6 | RPS8     | Thick Ascending Limb |

|            |            |       |       |          |   |           |                      |
|------------|------------|-------|-------|----------|---|-----------|----------------------|
| 3.4117E-67 | -0.2831529 | 0.924 | 0.948 | 6.89E-63 | 6 | RPL34     | Thick Ascending Limb |
| 1.099E-139 | -0.3723072 | 0.59  | 0.791 | 2.2E-135 | 6 | RPS15     | Thick Ascending Limb |
| 5.386E-105 | -0.3238737 | 0.746 | 0.85  | 1.1E-100 | 6 | PTMA      | Thick Ascending Limb |
| 4.365E-131 | -0.3678459 | 0.631 | 0.809 | 8.8E-127 | 6 | RPLP1     | Thick Ascending Limb |
| 1.316E-149 | -0.4125814 | 0.542 | 0.773 | 2.7E-145 | 6 | RPL32     | Thick Ascending Limb |
| 7.359E-125 | -0.3713257 | 0.627 | 0.801 | 1.5E-120 | 6 | RPL13A    | Thick Ascending Limb |
| 1.0603E-68 | -0.3162541 | 0.826 | 0.873 | 2.14E-64 | 6 | RPL39     | Thick Ascending Limb |
| 2.035E-147 | -0.3966912 | 0.639 | 0.828 | 4.1E-143 | 6 | RPL13     | Thick Ascending Limb |
| 7.541E-143 | -0.4986066 | 0.423 | 0.665 | 1.5E-138 | 6 | ACTB      | Thick Ascending Limb |
| 3.959E-160 | -0.4432195 | 0.574 | 0.793 | 8E-156   | 6 | RPL10     | Thick Ascending Limb |
| 3.5834E-95 | -0.4912563 | 0.376 | 0.574 | 7.24E-91 | 6 | FTH1      | Thick Ascending Limb |
| 8.365E-113 | -0.5408716 | 0.358 | 0.592 | 1.7E-108 | 6 | FOS       | Thick Ascending Limb |
| 2.141E-125 | -0.3997566 | 0.676 | 0.818 | 4.3E-121 | 6 | RPS18     | Thick Ascending Limb |
| 9.406E-160 | -0.4479044 | 0.606 | 0.811 | 1.9E-155 | 6 | RPS19     | Thick Ascending Limb |
| 8.156E-18  | -0.5662886 | 0.143 | 0.219 | 1.65E-13 | 6 | MT1G      | Thick Ascending Limb |
| 6.978E-183 | -0.4501966 | 0.766 | 0.912 | 1.4E-178 | 6 | RPL21     | Thick Ascending Limb |
| 3.088E-260 | -0.6289759 | 0.493 | 0.805 | 6.2E-256 | 6 | TMSB10    | Thick Ascending Limb |
| 1.671E-196 | -0.4754267 | 0.822 | 0.951 | 3.4E-192 | 6 | RPS27     | Thick Ascending Limb |
| 0          | -0.9836889 | 0.481 | 0.902 | 0        | 6 | TMSB4X    | Thick Ascending Limb |
| 4.294E-140 | -0.9175156 | 0.487 | 0.711 | 8.7E-136 | 6 | FTL       | Thick Ascending Limb |
| 2.357E-26  | -1.5207982 | 0.078 | 0.171 | 4.76E-22 | 6 | IGKC      | Thick Ascending Limb |
| 0          | -1.0079934 | 0.77  | 0.962 | 0        | 6 | B2M       | Thick Ascending Limb |
| 0          | 0.86502022 | 0.581 | 0.006 | 0        | 7 | NPHS2     | Podocytes            |
| 0          | 0.53866655 | 0.47  | 0.004 | 0        | 7 | P11-550H2 | Podocytes            |
| 0          | 0.40204432 | 0.367 | 0.003 | 0        | 7 | PCOLCE2   | Podocytes            |
| 0          | 0.57271149 | 0.514 | 0.006 | 0        | 7 | FGF1      | Podocytes            |
| 0          | 0.8315323  | 0.649 | 0.011 | 0        | 7 | CLIC5     | Podocytes            |
| 0          | 1.23907606 | 0.74  | 0.021 | 0        | 7 | PTGDS     | Podocytes            |
| 0          | 0.5055159  | 0.48  | 0.006 | 0        | 7 | PLA2R1    | Podocytes            |
| 0          | 0.62224987 | 0.556 | 0.009 | 0        | 7 | PTPRO     | Podocytes            |
| 0          | 0.5721215  | 0.508 | 0.008 | 0        | 7 | SPOCK1    | Podocytes            |
| 0          | 0.71081931 | 0.596 | 0.012 | 0        | 7 | MME       | Podocytes            |
| 0          | 0.71312493 | 0.575 | 0.012 | 0        | 7 | DCN       | Podocytes            |
| 0          | 1.31110904 | 0.796 | 0.031 | 0        | 7 | PODXL     | Podocytes            |
| 0          | 0.30438006 | 0.312 | 0.003 | 0        | 7 | WT1       | Podocytes            |
| 0          | 0.29862702 | 0.29  | 0.003 | 0        | 7 | NDNF      | Podocytes            |
| 0          | 0.66262215 | 0.56  | 0.013 | 0        | 7 | NPNT      | Podocytes            |
| 0          | 0.33857228 | 0.31  | 0.004 | 0        | 7 | TNNT2     | Podocytes            |
| 0          | 0.83285475 | 0.642 | 0.022 | 0        | 7 | HTRA1     | Podocytes            |
| 0          | 0.40396278 | 0.331 | 0.006 | 0        | 7 | APOD      | Podocytes            |
| 0          | 0.22135354 | 0.233 | 0.003 | 0        | 7 | C14orf37  | Podocytes            |
| 0          | 0.2930364  | 0.284 | 0.005 | 0        | 7 | TPPP3     | Podocytes            |
| 0          | 0.47523769 | 0.454 | 0.013 | 0        | 7 | ENPEP     | Podocytes            |
| 0          | 0.25584143 | 0.256 | 0.004 | 0        | 7 | GAS1      | Podocytes            |
| 0          | 0.28323874 | 0.282 | 0.005 | 0        | 7 | F3        | Podocytes            |
| 0          | 0.33410923 | 0.328 | 0.007 | 0        | 7 | TMEM150C  | Podocytes            |
| 0          | 0.53385214 | 0.445 | 0.018 | 0        | 7 | IGFBP2    | Podocytes            |
| 0          | 0.67463423 | 0.569 | 0.031 | 0        | 7 | VEGFA     | Podocytes            |

|            |            |       |       |          |   |          |           |
|------------|------------|-------|-------|----------|---|----------|-----------|
| 0          | 0.30779689 | 0.314 | 0.008 | 0        | 7 | SBSPON   | Podocytes |
| 0          | 0.45847549 | 0.451 | 0.018 | 0        | 7 | ZDHHC6   | Podocytes |
| 0          | 0.42270136 | 0.428 | 0.016 | 0        | 7 | COL4A3   | Podocytes |
| 0          | 0.28998377 | 0.303 | 0.008 | 0        | 7 | NEBL     | Podocytes |
| 0          | 0.2665924  | 0.264 | 0.007 | 0        | 7 | ALS2CL   | Podocytes |
| 0          | 0.31506628 | 0.32  | 0.011 | 0        | 7 | SEMA5A   | Podocytes |
| 0          | 0.22284707 | 0.233 | 0.006 | 0        | 7 | DACH1    | Podocytes |
| 0          | 1.25551632 | 0.569 | 0.089 | 0        | 7 | CXCL14   | Podocytes |
| 0          | 0.43612384 | 0.396 | 0.023 | 0        | 7 | CDKN1C   | Podocytes |
| 0          | 0.45533373 | 0.469 | 0.029 | 0        | 7 | TJP1     | Podocytes |
| 0          | 0.98050207 | 0.644 | 0.087 | 0        | 7 | CTGF     | Podocytes |
| 0          | 0.30115289 | 0.321 | 0.014 | 0        | 7 | SPOCK2   | Podocytes |
| 0          | 0.41397862 | 0.429 | 0.027 | 0        | 7 | TGFBR3   | Podocytes |
| 0          | 0.7055923  | 0.626 | 0.072 | 0        | 7 | CRIM1    | Podocytes |
| 0          | 0.58038727 | 0.555 | 0.055 | 0        | 7 | MYL9     | Podocytes |
| 0          | 0.23542707 | 0.254 | 0.011 | 0        | 7 | EPB41L5  | Podocytes |
| 0          | 0.32034015 | 0.347 | 0.021 | 0        | 7 | THSD7A   | Podocytes |
| 0          | 0.26597988 | 0.258 | 0.013 | 0        | 7 | CLDN11   | Podocytes |
| 0          | 0.49545418 | 0.449 | 0.043 | 0        | 7 | GOLIM4   | Podocytes |
| 0          | 0.23469828 | 0.253 | 0.012 | 0        | 7 | FOXC1    | Podocytes |
| 0          | 0.24371966 | 0.256 | 0.013 | 0        | 7 | NES      | Podocytes |
| 0          | 0.24177135 | 0.266 | 0.014 | 0        | 7 | SYNPO    | Podocytes |
| 0          | 0.20214269 | 0.198 | 0.009 | 0        | 7 | IGF1     | Podocytes |
| 0          | 0.33006618 | 0.35  | 0.027 | 0        | 7 | CDC42EP3 | Podocytes |
| 0          | 0.31852169 | 0.342 | 0.027 | 0        | 7 | UACA     | Podocytes |
| 0          | 0.34306488 | 0.366 | 0.034 | 0        | 7 | RARRES2  | Podocytes |
| 0          | 0.32257667 | 0.365 | 0.044 | 0        | 7 | BCAM     | Podocytes |
| 0          | 0.24217828 | 0.278 | 0.027 | 0        | 7 | IQGAP2   | Podocytes |
| 0          | 0.38975513 | 0.38  | 0.061 | 0        | 7 | BST2     | Podocytes |
| 0          | 0.30479074 | 0.369 | 0.052 | 0        | 7 | ACTN4    | Podocytes |
| 0          | 0.21010336 | 0.225 | 0.022 | 0        | 7 | SRGAP2C  | Podocytes |
| 7.055E-132 | 0.8344815  | 0.344 | 0.134 | 1.4E-127 | 7 | TIMP1    | Podocytes |
| 0          | 0.38932951 | 0.459 | 0.084 | 0        | 7 | MYH9     | Podocytes |
| 0          | 0.2405311  | 0.288 | 0.035 | 0        | 7 | DST      | Podocytes |
| 0          | 0.87306038 | 0.825 | 0.4   | 0        | 7 | ITM2B    | Podocytes |
| 0          | 0.20229947 | 0.236 | 0.027 | 0        | 7 | FAM134B  | Podocytes |
| 0          | 0.22336204 | 0.239 | 0.031 | 0        | 7 | TPM2     | Podocytes |
| 0          | 0.27262314 | 0.32  | 0.051 | 0        | 7 | HIPK2    | Podocytes |
| 0          | 0.34877706 | 0.443 | 0.1   | 0        | 7 | SPARC    | Podocytes |
| 0          | 0.79351327 | 0.84  | 0.443 | 0        | 7 | S100A6   | Podocytes |
| 1.497E-302 | 0.48723138 | 0.558 | 0.181 | 3E-298   | 7 | AIF1     | Podocytes |
| 0          | 0.68929816 | 0.75  | 0.348 | 0        | 7 | CALM2    | Podocytes |
| 1.188E-302 | 0.54116318 | 0.636 | 0.233 | 2.4E-298 | 7 | IGFBP7   | Podocytes |
| 7.631E-301 | 0.33746604 | 0.421 | 0.111 | 1.5E-296 | 7 | ANXA2    | Podocytes |
| 6.223E-265 | 0.44774825 | 0.595 | 0.224 | 1.3E-260 | 7 | DSTN     | Podocytes |
| 2.711E-257 | 0.21295239 | 0.273 | 0.056 | 5.5E-253 | 7 | RDX      | Podocytes |
| 8.118E-253 | 0.28537428 | 0.399 | 0.112 | 1.6E-248 | 7 | VAMP5    | Podocytes |
| 1.36E-250  | 0.30099619 | 0.43  | 0.128 | 2.7E-246 | 7 | NGFRAP1  | Podocytes |

|            |            |       |       |          |   |         |           |
|------------|------------|-------|-------|----------|---|---------|-----------|
| 2.09E-230  | 0.2186203  | 0.288 | 0.067 | 4.2E-226 | 7 | CD81    | Podocytes |
| 1.056E-211 | 0.23786857 | 0.355 | 0.099 | 2.1E-207 | 7 | CALD1   | Podocytes |
| 1.385E-175 | 0.23818943 | 0.305 | 0.087 | 2.8E-171 | 7 | TIMP3   | Podocytes |
| 1.028E-208 | 0.23652777 | 0.354 | 0.102 | 2.1E-204 | 7 | VAMP2   | Podocytes |
| 2.149E-182 | 0.26612456 | 0.377 | 0.126 | 4.3E-178 | 7 | HMGN3   | Podocytes |
| 4.327E-149 | 0.3672087  | 0.571 | 0.27  | 8.7E-145 | 7 | LGALS1  | Podocytes |
| 2.4884E-25 | 0.42758015 | 0.182 | 0.105 | 5.03E-21 | 7 | IGFBP5  | Podocytes |
| 1.751E-141 | 0.31691785 | 0.507 | 0.229 | 3.5E-137 | 7 | IFITM3  | Podocytes |
| 1.232E-143 | 0.29753983 | 0.476 | 0.214 | 2.5E-139 | 7 | DYNLL1  | Podocytes |
| 1.176E-149 | 0.21200741 | 0.349 | 0.119 | 2.4E-145 | 7 | WBP5    | Podocytes |
| 3.959E-141 | 0.21543737 | 0.362 | 0.132 | 8E-137   | 7 | ITGB1   | Podocytes |
| 2.384E-124 | 0.52683303 | 0.976 | 0.884 | 4.8E-120 | 7 | TMSB4X  | Podocytes |
| 1.3882E-88 | 0.27677752 | 0.377 | 0.182 | 2.81E-84 | 7 | S100A10 | Podocytes |
| 6.676E-106 | 0.24810345 | 0.46  | 0.227 | 1.3E-101 | 7 | SKP1    | Podocytes |
| 1.9002E-59 | 0.29763753 | 0.999 | 0.997 | 3.84E-55 | 7 | MALAT1  | Podocytes |
| 3.4517E-28 | -0.2087444 | 0.036 | 0.132 | 6.98E-24 | 7 | CXCL2   | Podocytes |
| 1.8399E-42 | -0.2334041 | 0.052 | 0.189 | 3.72E-38 | 7 | TYROBP  | Podocytes |
| 1.1884E-24 | -0.2122702 | 0.039 | 0.126 | 2.4E-20  | 7 | C1QA    | Podocytes |
| 4.774E-34  | -0.2997082 | 0.043 | 0.155 | 9.65E-30 | 7 | LYZ     | Podocytes |
| 2.3763E-31 | -0.210009  | 0.091 | 0.214 | 4.8E-27  | 7 | FXD2    | Podocytes |
| 2.3695E-73 | -0.3143694 | 0.086 | 0.298 | 4.79E-69 | 7 | SRGN    | Podocytes |
| 9.026E-22  | -0.2051181 | 0.079 | 0.173 | 1.82E-17 | 7 | WFDC2   | Podocytes |
| 3.0144E-42 | -0.2125423 | 0.123 | 0.278 | 6.09E-38 | 7 | BTG1    | Podocytes |
| 6.0733E-41 | -0.2215894 | 0.118 | 0.267 | 1.23E-36 | 7 | ZFP36   | Podocytes |
| 1.5145E-20 | -0.204756  | 0.083 | 0.173 | 3.06E-16 | 7 | DEFB1   | Podocytes |
| 2.0063E-58 | -0.2634832 | 0.118 | 0.308 | 4.05E-54 | 7 | KLF6    | Podocytes |
| 9.4036E-24 | -0.2242496 | 0.089 | 0.191 | 1.9E-19  | 7 | CLU     | Podocytes |
| 5.8289E-38 | -0.2122579 | 0.15  | 0.294 | 1.18E-33 | 7 | CYBA    | Podocytes |
| 2.634E-33  | -0.2141886 | 0.15  | 0.285 | 5.32E-29 | 7 | HSPA1B  | Podocytes |
| 9.6841E-20 | -0.2415301 | 0.073 | 0.155 | 1.96E-15 | 7 | APOE    | Podocytes |
| 3.0442E-46 | -0.2205608 | 0.224 | 0.397 | 6.15E-42 | 7 | RPL37   | Podocytes |
| 1.2733E-38 | -0.201832  | 0.259 | 0.412 | 2.57E-34 | 7 | UBA52   | Podocytes |
| 8.437E-62  | -0.2869801 | 0.177 | 0.378 | 1.7E-57  | 7 | PABPC1  | Podocytes |
| 4.0335E-48 | -0.2303444 | 0.26  | 0.438 | 8.15E-44 | 7 | RPL31   | Podocytes |
| 1.7043E-44 | -0.2280414 | 0.253 | 0.417 | 3.44E-40 | 7 | RPS9    | Podocytes |
| 1.0246E-29 | -0.2020507 | 0.304 | 0.428 | 2.07E-25 | 7 | RPS3    | Podocytes |
| 1.2442E-33 | -0.2065227 | 0.332 | 0.463 | 2.51E-29 | 7 | RPL19   | Podocytes |
| 2.3327E-43 | -0.2300273 | 0.309 | 0.469 | 4.71E-39 | 7 | RPS17   | Podocytes |
| 7.9769E-34 | -0.2116331 | 0.342 | 0.473 | 1.61E-29 | 7 | RPS13   | Podocytes |
| 7.3558E-42 | -0.2348835 | 0.344 | 0.498 | 1.49E-37 | 7 | RPS26   | Podocytes |
| 3.9884E-31 | -0.2100752 | 0.408 | 0.523 | 8.06E-27 | 7 | RPL35A  | Podocytes |
| 2.8109E-35 | -0.2026605 | 0.652 | 0.797 | 5.68E-31 | 7 | MT-ND4L | Podocytes |
| 2.8352E-51 | -0.2555496 | 0.337 | 0.507 | 5.73E-47 | 7 | RPL27A  | Podocytes |
| 2.1156E-40 | -0.2271956 | 0.424 | 0.56  | 4.28E-36 | 7 | RPL37A  | Podocytes |
| 7.8231E-32 | -0.2024534 | 0.589 | 0.671 | 1.58E-27 | 7 | RPS28   | Podocytes |
| 3.438E-38  | -0.28374   | 0.246 | 0.392 | 6.95E-34 | 7 | DUSP1   | Podocytes |
| 1.2575E-30 | -0.2253742 | 0.43  | 0.533 | 2.54E-26 | 7 | RPS3A   | Podocytes |
| 6.5697E-57 | -0.2960082 | 0.3   | 0.484 | 1.33E-52 | 7 | RPS2    | Podocytes |

|            |            |       |       |          |   |         |                      |
|------------|------------|-------|-------|----------|---|---------|----------------------|
| 8.6278E-70 | -0.3032801 | 0.324 | 0.53  | 1.74E-65 | 7 | RPS24   | Podocytes            |
| 9.7788E-51 | -0.2636131 | 0.393 | 0.553 | 1.98E-46 | 7 | RPL11   | Podocytes            |
| 2.005E-42  | -0.2468224 | 0.431 | 0.567 | 4.05E-38 | 7 | RPS25   | Podocytes            |
| 3.7185E-32 | -0.2039152 | 0.717 | 0.773 | 7.51E-28 | 7 | RPS27A  | Podocytes            |
| 1.5867E-36 | -0.3144068 | 0.222 | 0.363 | 3.21E-32 | 7 | CD74    | Podocytes            |
| 4.4886E-55 | -0.3466474 | 0.239 | 0.422 | 9.07E-51 | 7 | SAT1    | Podocytes            |
| 1.2808E-51 | -0.2774027 | 0.397 | 0.552 | 2.59E-47 | 7 | RPL23A  | Podocytes            |
| 4.0448E-39 | -0.4392019 | 0.125 | 0.271 | 8.17E-35 | 7 | SPP1    | Podocytes            |
| 2.9476E-66 | -0.299655  | 0.4   | 0.581 | 5.96E-62 | 7 | RPS23   | Podocytes            |
| 3.9122E-83 | -0.3443671 | 0.35  | 0.573 | 7.91E-79 | 7 | RPL12   | Podocytes            |
| 4.8238E-71 | -0.3281042 | 0.365 | 0.562 | 9.75E-67 | 7 | RPL18A  | Podocytes            |
| 1.0992E-56 | -0.2756333 | 0.491 | 0.635 | 2.22E-52 | 7 | RPL35   | Podocytes            |
| 1.8997E-57 | -0.2937419 | 0.414 | 0.57  | 3.84E-53 | 7 | TPT1    | Podocytes            |
| 9.3114E-48 | -0.2775816 | 0.462 | 0.599 | 1.88E-43 | 7 | RPS6    | Podocytes            |
| 8.2048E-76 | -0.3116592 | 0.444 | 0.644 | 1.66E-71 | 7 | RPL36   | Podocytes            |
| 1.0456E-55 | -0.2916296 | 0.465 | 0.614 | 2.11E-51 | 7 | RPS12   | Podocytes            |
| 5.767E-100 | -0.376845  | 0.354 | 0.601 | 1.17E-95 | 7 | RPL28   | Podocytes            |
| 1.1723E-56 | -0.2689326 | 0.591 | 0.716 | 2.37E-52 | 7 | RPS14   | Podocytes            |
| 4.4619E-61 | -0.3041287 | 0.436 | 0.597 | 9.02E-57 | 7 | RPLP2   | Podocytes            |
| 1.2283E-76 | -0.3421419 | 0.391 | 0.591 | 2.48E-72 | 7 | RPL26   | Podocytes            |
| 2.6653E-62 | -0.2574223 | 0.791 | 0.876 | 5.39E-58 | 7 | RPL41   | Podocytes            |
| 1.772E-06  | -0.258866  | 0.325 | 0.358 | 0.035809 | 7 | MT2A    | Podocytes            |
| 5.1733E-88 | -0.3747947 | 0.393 | 0.607 | 1.05E-83 | 7 | RPS15A  | Podocytes            |
| 1.0244E-47 | -0.4826487 | 0.169 | 0.334 | 2.07E-43 | 7 | HLA-DRA | Podocytes            |
| 2.7163E-58 | -0.3007665 | 0.574 | 0.696 | 5.49E-54 | 7 | RPS8    | Podocytes            |
| 8.4354E-71 | -0.2884721 | 0.68  | 0.787 | 1.7E-66  | 7 | RPS15   | Podocytes            |
| 1.3971E-69 | -0.3202166 | 0.67  | 0.788 | 2.82E-65 | 7 | RPL10   | Podocytes            |
| 7.383E-89  | -0.3511029 | 0.603 | 0.77  | 1.49E-84 | 7 | RPL32   | Podocytes            |
| 2.797E-24  | -0.3168512 | 0.506 | 0.569 | 5.65E-20 | 7 | FTH1    | Podocytes            |
| 3.1177E-91 | -0.3477508 | 0.663 | 0.798 | 6.3E-87  | 7 | RPL13A  | Podocytes            |
| 4.7586E-67 | -0.3378509 | 0.685 | 0.797 | 9.62E-63 | 7 | TMSB10  | Podocytes            |
| 3.4868E-42 | -0.3767743 | 0.453 | 0.587 | 7.05E-38 | 7 | FOS     | Podocytes            |
| 4.623E-115 | -0.3748878 | 0.63  | 0.808 | 9.3E-111 | 7 | RPLP1   | Podocytes            |
| 5.1206E-73 | -0.3175811 | 0.838 | 0.909 | 1.03E-68 | 7 | RPL21   | Podocytes            |
| 2.1712E-72 | -0.314557  | 0.888 | 0.949 | 4.39E-68 | 7 | RPL34   | Podocytes            |
| 4.5014E-17 | -0.4935866 | 0.133 | 0.219 | 9.1E-13  | 7 | MT1G    | Podocytes            |
| 1.345E-123 | -0.383809  | 0.682 | 0.855 | 2.7E-119 | 7 | RPS29   | Podocytes            |
| 1.498E-116 | -0.3859649 | 0.66  | 0.826 | 3E-112   | 7 | RPL13   | Podocytes            |
| 6.704E-102 | -0.3901845 | 0.669 | 0.818 | 1.35E-97 | 7 | RPS18   | Podocytes            |
| 3.688E-151 | -0.4597561 | 0.579 | 0.81  | 7.5E-147 | 7 | RPS19   | Podocytes            |
| 1.172E-128 | -0.4422227 | 0.731 | 0.876 | 2.4E-124 | 7 | RPL39   | Podocytes            |
| 1.843E-134 | -0.418083  | 0.87  | 0.949 | 3.7E-130 | 7 | RPS27   | Podocytes            |
| 2.7148E-83 | -0.7869828 | 0.528 | 0.708 | 5.49E-79 | 7 | FTL     | Podocytes            |
| 2.3789E-09 | -1.4037826 | 0.115 | 0.169 | 4.81E-05 | 7 | IGKC    | Podocytes            |
| 0          | 1.01599073 | 0.503 | 0.013 | 0        | 8 | SOD3    | Thick Ascending Limb |
| 0          | 1.32007963 | 0.821 | 0.067 | 0        | 8 | S100A2  | Thick Ascending Limb |
| 0          | 0.38430234 | 0.322 | 0.008 | 0        | 8 | PAPPA2  | Thick Ascending Limb |
| 0          | 1.1365232  | 0.811 | 0.152 | 0        | 8 | WFDC2   | Thick Ascending Limb |

|            |            |       |       |          |   |          |                      |
|------------|------------|-------|-------|----------|---|----------|----------------------|
| 0          | 0.36708046 | 0.352 | 0.023 | 0        | 8 | CLDN10   | Thick Ascending Limb |
| 0          | 0.52596589 | 0.467 | 0.046 | 0        | 8 | SLC12A1  | Thick Ascending Limb |
| 0          | 0.49054169 | 0.434 | 0.048 | 0        | 8 | PCSK1N   | Thick Ascending Limb |
| 0          | 0.20283285 | 0.193 | 0.01  | 0        | 8 | SUCNR1   | Thick Ascending Limb |
| 0          | 0.34801738 | 0.288 | 0.03  | 0        | 8 | IGFBP6   | Thick Ascending Limb |
| 0          | 0.27263269 | 0.274 | 0.023 | 0        | 8 | BBOX1    | Thick Ascending Limb |
| 0          | 0.24762115 | 0.245 | 0.02  | 0        | 8 | ITGB6    | Thick Ascending Limb |
| 0          | 0.69505851 | 0.655 | 0.156 | 0        | 8 | DEFB1    | Thick Ascending Limb |
| 0          | 0.41776387 | 0.461 | 0.069 | 0        | 8 | MUC1     | Thick Ascending Limb |
| 0          | 0.30252705 | 0.304 | 0.034 | 0        | 8 | ACSL4    | Thick Ascending Limb |
| 0          | 0.25003692 | 0.237 | 0.026 | 0        | 8 | ITM2C    | Thick Ascending Limb |
| 0          | 0.29700217 | 0.318 | 0.042 | 0        | 8 | CAMK2N1  | Thick Ascending Limb |
| 0          | 0.68111332 | 0.643 | 0.198 | 0        | 8 | FXD2     | Thick Ascending Limb |
| 0          | 0.70881918 | 0.638 | 0.21  | 0        | 8 | ADIRF    | Thick Ascending Limb |
| 0          | 0.31254351 | 0.339 | 0.051 | 0        | 8 | KCNJ16   | Thick Ascending Limb |
| 3.602E-298 | 0.61844224 | 0.629 | 0.219 | 7.3E-294 | 8 | ATP1B1   | Thick Ascending Limb |
| 0          | 0.23029009 | 0.244 | 0.032 | 0        | 8 | C8orf4   | Thick Ascending Limb |
| 0          | 0.90191603 | 0.804 | 0.445 | 0        | 8 | S100A6   | Thick Ascending Limb |
| 0          | 0.23523835 | 0.272 | 0.042 | 0        | 8 | MAL      | Thick Ascending Limb |
| 0          | 0.22325878 | 0.264 | 0.04  | 0        | 8 | CA12     | Thick Ascending Limb |
| 1.131E-287 | 0.54510397 | 0.678 | 0.255 | 2.3E-283 | 8 | SPP1     | Thick Ascending Limb |
| 6.937E-247 | 0.38760794 | 0.447 | 0.138 | 1.4E-242 | 8 | CD9      | Thick Ascending Limb |
| 1.096E-263 | 0.31455725 | 0.397 | 0.102 | 2.2E-259 | 8 | ATP1A1   | Thick Ascending Limb |
| 2.502E-242 | 0.30661587 | 0.354 | 0.09  | 5.1E-238 | 8 | S100A13  | Thick Ascending Limb |
| 1.326E-207 | 0.40448483 | 0.457 | 0.165 | 2.7E-203 | 8 | ATP6V0E1 | Thick Ascending Limb |
| 1.066E-228 | 0.3437515  | 0.472 | 0.149 | 2.2E-224 | 8 | CD24     | Thick Ascending Limb |
| 2.948E-193 | 0.3539847  | 0.56  | 0.226 | 6E-189   | 8 | DSTN     | Thick Ascending Limb |
| 1.328E-127 | 0.32637763 | 0.457 | 0.202 | 2.7E-123 | 8 | HSPB1    | Thick Ascending Limb |
| 4.757E-130 | 0.25857216 | 0.357 | 0.132 | 9.6E-126 | 8 | CRIP1    | Thick Ascending Limb |
| 2.8431E-96 | 0.2148585  | 0.236 | 0.081 | 5.75E-92 | 8 | PDK4     | Thick Ascending Limb |
| 1.2683E-90 | 0.24391312 | 0.414 | 0.201 | 2.56E-86 | 8 | PPDPF    | Thick Ascending Limb |
| 2.9454E-81 | 0.20816127 | 0.339 | 0.155 | 5.95E-77 | 8 | TMEM59   | Thick Ascending Limb |
| 6.0673E-72 | 0.29870433 | 0.593 | 0.407 | 1.23E-67 | 8 | ITM2B    | Thick Ascending Limb |
| 4.3466E-75 | 0.21161996 | 0.372 | 0.183 | 8.78E-71 | 8 | S100A10  | Thick Ascending Limb |
| 2.8468E-75 | 0.20422711 | 0.383 | 0.188 | 5.75E-71 | 8 | GSTP1    | Thick Ascending Limb |
| 2.0098E-24 | 0.25848426 | 0.999 | 0.997 | 4.06E-20 | 8 | MALAT1   | Thick Ascending Limb |
| 1.9979E-49 | -0.2576441 | 0.034 | 0.189 | 4.04E-45 | 8 | TYROBP   | Thick Ascending Limb |
| 8.779E-29  | -0.2342413 | 0.028 | 0.126 | 1.77E-24 | 8 | C1QA     | Thick Ascending Limb |
| 7.0899E-55 | -0.2481091 | 0.047 | 0.221 | 1.43E-50 | 8 | CXCR4    | Thick Ascending Limb |
| 8.4163E-95 | -0.3685516 | 0.043 | 0.299 | 1.7E-90  | 8 | SRGN     | Thick Ascending Limb |
| 1.043E-47  | -0.2610039 | 0.042 | 0.197 | 2.11E-43 | 8 | AIF1     | Thick Ascending Limb |
| 2.2789E-63 | -0.2596578 | 0.06  | 0.261 | 4.61E-59 | 8 | VIM      | Thick Ascending Limb |
| 2.0181E-38 | -0.3159311 | 0.03  | 0.156 | 4.08E-34 | 8 | LYZ      | Thick Ascending Limb |
| 4.7427E-31 | -0.2132194 | 0.047 | 0.16  | 9.58E-27 | 8 | CCL5     | Thick Ascending Limb |
| 4.467E-21  | -0.2304856 | 0.064 | 0.155 | 9.03E-17 | 8 | APOE     | Thick Ascending Limb |
| 1.2029E-54 | -0.271575  | 0.173 | 0.378 | 2.43E-50 | 8 | PABPC1   | Thick Ascending Limb |
| 5.0212E-06 | -0.2006392 | 0.072 | 0.108 | 0.101468 | 8 | IGFBP5   | Thick Ascending Limb |
| 2.8204E-36 | -0.3063062 | 0.134 | 0.283 | 5.7E-32  | 8 | LGALS1   | Thick Ascending Limb |

|            |            |       |       |          |   |          |                      |
|------------|------------|-------|-------|----------|---|----------|----------------------|
| 7.979E-76  | -0.429256  | 0.127 | 0.365 | 1.61E-71 | 8 | CD74     | Thick Ascending Limb |
| 6.7155E-08 | -0.2148062 | 0.137 | 0.19  | 0.001357 | 8 | MT1X     | Thick Ascending Limb |
| 1.9592E-35 | -0.2182304 | 0.372 | 0.524 | 3.96E-31 | 8 | RPL35A   | Thick Ascending Limb |
| 7.8288E-86 | -0.6188048 | 0.087 | 0.336 | 1.58E-81 | 8 | HLA-DRA  | Thick Ascending Limb |
| 1.4254E-41 | -0.2412608 | 0.336 | 0.498 | 2.88E-37 | 8 | RPS26    | Thick Ascending Limb |
| 1.1645E-24 | -0.2057268 | 0.428 | 0.533 | 2.35E-20 | 8 | RPS3A    | Thick Ascending Limb |
| 9.504E-30  | -0.2000532 | 0.573 | 0.671 | 1.92E-25 | 8 | RPS28    | Thick Ascending Limb |
| 5.8327E-34 | -0.2450255 | 0.341 | 0.482 | 1.18E-29 | 8 | RPS2     | Thick Ascending Limb |
| 3.6425E-39 | -0.290452  | 0.234 | 0.392 | 7.36E-35 | 8 | DUSP1    | Thick Ascending Limb |
| 5.7591E-37 | -0.2327182 | 0.452 | 0.596 | 1.16E-32 | 8 | RPLP2    | Thick Ascending Limb |
| 1.2737E-38 | -0.244034  | 0.462 | 0.597 | 2.57E-34 | 8 | RPL28    | Thick Ascending Limb |
| 4.7838E-57 | -0.2914576 | 0.384 | 0.571 | 9.67E-53 | 8 | TPT1     | Thick Ascending Limb |
| 1.6669E-51 | -0.288882  | 0.383 | 0.561 | 3.37E-47 | 8 | RPL18A   | Thick Ascending Limb |
| 2.0728E-36 | -0.2128262 | 0.797 | 0.851 | 4.19E-32 | 8 | RPS29    | Thick Ascending Limb |
| 7.4739E-29 | -0.207749  | 0.774 | 0.804 | 1.51E-24 | 8 | RPLP1    | Thick Ascending Limb |
| 2.2101E-38 | -0.2218464 | 0.733 | 0.786 | 4.47E-34 | 8 | RPS15    | Thick Ascending Limb |
| 1.3437E-19 | -0.2075402 | 0.812 | 0.813 | 2.72E-15 | 8 | RPS18    | Thick Ascending Limb |
| 2.9151E-34 | -0.22373   | 0.75  | 0.796 | 5.89E-30 | 8 | RPL13A   | Thick Ascending Limb |
| 1.8443E-33 | -0.2337615 | 0.7   | 0.766 | 3.73E-29 | 8 | RPL32    | Thick Ascending Limb |
| 2.9115E-28 | -0.2332703 | 0.751 | 0.786 | 5.88E-24 | 8 | RPL10    | Thick Ascending Limb |
| 2.9342E-37 | -0.258755  | 0.606 | 0.695 | 5.93E-33 | 8 | RPS8     | Thick Ascending Limb |
| 8.0577E-62 | -0.336731  | 0.426 | 0.605 | 1.63E-57 | 8 | RPS15A   | Thick Ascending Limb |
| 1.7614E-06 | -0.2451545 | 0.566 | 0.567 | 0.035594 | 8 | FTH1     | Thick Ascending Limb |
| 3.7561E-47 | -0.2615874 | 0.777 | 0.822 | 7.59E-43 | 8 | RPL13    | Thick Ascending Limb |
| 4.2082E-41 | -0.2595243 | 0.952 | 0.947 | 8.5E-37  | 8 | RPL34    | Thick Ascending Limb |
| 4.1968E-30 | -0.3314298 | 0.476 | 0.586 | 8.48E-26 | 8 | FOS      | Thick Ascending Limb |
| 1.3236E-48 | -0.2808255 | 0.893 | 0.908 | 2.67E-44 | 8 | RPL21    | Thick Ascending Limb |
| 6.8832E-50 | -0.2786405 | 0.952 | 0.946 | 1.39E-45 | 8 | RPS27    | Thick Ascending Limb |
| 3.0168E-40 | -0.3325085 | 0.564 | 0.659 | 6.1E-36  | 8 | ACTB     | Thick Ascending Limb |
| 2.1978E-77 | -0.3570538 | 0.693 | 0.806 | 4.44E-73 | 8 | RPS19    | Thick Ascending Limb |
| 5.522E-79  | -0.3999315 | 0.684 | 0.796 | 1.12E-74 | 8 | TMSB10   | Thick Ascending Limb |
| 4.253E-116 | -0.4523721 | 0.783 | 0.874 | 8.6E-112 | 8 | RPL39    | Thick Ascending Limb |
| 1.846E-250 | -0.7915296 | 0.669 | 0.893 | 3.7E-246 | 8 | TMSB4X   | Thick Ascending Limb |
| 2.306E-185 | -0.707021  | 0.909 | 0.956 | 4.7E-181 | 8 | B2M      | Thick Ascending Limb |
| 8.0076E-57 | -0.7990986 | 0.605 | 0.705 | 1.62E-52 | 8 | FTL      | Thick Ascending Limb |
| 4.0422E-18 | -1.4786054 | 0.084 | 0.17  | 8.17E-14 | 8 | IGKC     | Thick Ascending Limb |
| 0          | 2.56409235 | 0.837 | 0.064 | 0        | 9 | IGHG1    | B cells              |
| 0          | 0.95248667 | 0.51  | 0.018 | 0        | 9 | IGHGP    | B cells              |
| 0          | 3.89678455 | 0.964 | 0.147 | 0        | 9 | IGKC     | B cells              |
| 0          | 1.73899747 | 0.73  | 0.059 | 0        | 9 | IGHG3    | B cells              |
| 0          | 0.20603379 | 0.13  | 0.002 | 0        | 9 | IGKV1-12 | B cells              |
| 0          | 0.47096807 | 0.378 | 0.022 | 0        | 9 | MZB1     | B cells              |
| 0          | 0.6564096  | 0.327 | 0.029 | 0        | 9 | JCHAIN   | B cells              |
| 0          | 0.20929413 | 0.254 | 0.012 | 0        | 9 | IGHG2    | B cells              |
| 0          | 0.83453981 | 0.617 | 0.146 | 0        | 9 | SSR4     | B cells              |
| 0          | 0.49633811 | 0.407 | 0.069 | 0        | 9 | XBP1     | B cells              |
| 0          | 0.21818136 | 0.235 | 0.027 | 0        | 9 | FKBP11   | B cells              |
| 3.2917E-63 | 0.23016997 | 0.492 | 0.285 | 6.65E-59 | 9 | CYBA     | B cells              |

|            |            |       |       |          |    |          |                    |
|------------|------------|-------|-------|----------|----|----------|--------------------|
| 1.5952E-24 | -0.2010341 | 0.127 | 0.248 | 3.22E-20 | 9  | IGFBP7   | B cells            |
| 6.7726E-21 | -0.2247609 | 0.125 | 0.233 | 1.37E-16 | 9  | ATP1B1   | B cells            |
| 1.8335E-34 | -0.2350146 | 0.258 | 0.416 | 3.71E-30 | 9  | ITM2B    | B cells            |
| 7.6477E-15 | -0.2577534 | 0.235 | 0.331 | 1.55E-10 | 9  | HLA-DRA  | B cells            |
| 4.2655E-41 | -0.2177238 | 0.733 | 0.849 | 8.62E-37 | 9  | PTMA     | B cells            |
| 3.9406E-24 | -0.2078155 | 0.721 | 0.795 | 7.96E-20 | 9  | MT-ND4L  | B cells            |
| 9.7855E-45 | -0.2369417 | 0.595 | 0.741 | 1.98E-40 | 9  | EEF1A1   | B cells            |
| 4.7042E-51 | -0.3458864 | 0.257 | 0.46  | 9.51E-47 | 9  | S100A6   | B cells            |
| 9.2294E-23 | -0.3033061 | 0.235 | 0.361 | 1.87E-18 | 9  | MT2A     | B cells            |
| 3.2138E-50 | -0.2000864 | 0.999 | 1     | 6.49E-46 | 9  | MT-CO1   | B cells            |
| 8.1854E-49 | -0.202758  | 1     | 1     | 1.65E-44 | 9  | MT-CO3   | B cells            |
| 3.3754E-22 | -0.3627247 | 0.154 | 0.269 | 6.82E-18 | 9  | SPP1     | B cells            |
| 4.6621E-42 | -0.2309708 | 0.907 | 0.953 | 9.42E-38 | 9  | MT-ND1   | B cells            |
| 5.5382E-54 | -0.3160593 | 0.464 | 0.662 | 1.12E-49 | 9  | ACTB     | B cells            |
| 7.4246E-32 | -0.3012949 | 0.431 | 0.571 | 1.5E-27  | 9  | FTH1     | B cells            |
| 3.1244E-63 | -0.3176566 | 0.626 | 0.798 | 6.31E-59 | 9  | TMSB10   | B cells            |
| 8.9279E-39 | -0.2851303 | 0.781 | 0.889 | 1.8E-34  | 9  | TMSB4X   | B cells            |
| 2.1662E-06 | -0.3653087 | 0.169 | 0.218 | 0.043775 | 9  | MT1G     | B cells            |
| 0          | 1.36881387 | 0.751 | 0.03  | 0        | 10 | SLPI     | Immune/Neutrophils |
| 0          | 0.37604096 | 0.129 | 0.002 | 0        | 10 | SAA1     | Immune/Neutrophils |
| 0          | 1.47717466 | 0.818 | 0.252 | 0        | 10 | SPP1     | Immune/Neutrophils |
| 0          | 0.91784378 | 0.685 | 0.157 | 0        | 10 | WFDC2    | Immune/Neutrophils |
| 0          | 0.20387561 | 0.196 | 0.022 | 0        | 10 | ITGB6    | Immune/Neutrophils |
| 1.12E-136  | 0.48221897 | 0.234 | 0.063 | 2.3E-132 | 10 | SERPINA1 | Immune/Neutrophils |
| 1.177E-233 | 0.28236826 | 0.244 | 0.044 | 2.4E-229 | 10 | NNMT     | Immune/Neutrophils |
| 7.14E-266  | 0.32534182 | 0.339 | 0.073 | 1.4E-261 | 10 | MUC1     | Immune/Neutrophils |
| 6.544E-221 | 0.30747714 | 0.305 | 0.068 | 1.3E-216 | 10 | MMP7     | Immune/Neutrophils |
| 1.2E-172   | 0.40233674 | 0.43  | 0.151 | 2.4E-168 | 10 | CD24     | Immune/Neutrophils |
| 1.483E-212 | 0.3752014  | 0.529 | 0.179 | 3E-208   | 10 | CLU      | Immune/Neutrophils |
| 8.449E-170 | 0.32494596 | 0.47  | 0.162 | 1.7E-165 | 10 | DEFB1    | Immune/Neutrophils |
| 1.999E-155 | 0.37402522 | 0.51  | 0.203 | 4E-151   | 10 | FXD2     | Immune/Neutrophils |
| 4.202E-131 | 0.50724452 | 0.708 | 0.449 | 8.5E-127 | 10 | S100A6   | Immune/Neutrophils |
| 5.332E-124 | 0.23902336 | 0.287 | 0.089 | 1.1E-119 | 10 | CRYAB    | Immune/Neutrophils |
| 3.804E-101 | 0.20350629 | 0.271 | 0.093 | 7.69E-97 | 10 | S100A13  | Immune/Neutrophils |
| 7.8166E-62 | 0.2140915  | 0.415 | 0.217 | 1.58E-57 | 10 | ADIRF    | Immune/Neutrophils |
| 3.2107E-50 | 0.20898279 | 0.371 | 0.205 | 6.49E-46 | 10 | HSPB1    | Immune/Neutrophils |
| 8.6263E-91 | 0.33647977 | 0.985 | 0.951 | 1.74E-86 | 10 | MT-ND1   | Immune/Neutrophils |
| 8.8938E-38 | 0.3219051  | 0.837 | 0.792 | 1.8E-33  | 10 | MT-ND4L  | Immune/Neutrophils |
| 2.5469E-34 | 0.23412639 | 0.925 | 0.885 | 5.15E-30 | 10 | MT-ND5   | Immune/Neutrophils |
| 3.5721E-74 | 0.20523487 | 1     | 1     | 7.22E-70 | 10 | MT-CO2   | Immune/Neutrophils |
| 1.3051E-64 | 0.20061449 | 1     | 1     | 2.64E-60 | 10 | MT-CO1   | Immune/Neutrophils |
| 3.3133E-36 | -0.2333526 | 0.031 | 0.16  | 6.7E-32  | 10 | CCL5     | Immune/Neutrophils |
| 2.834E-89  | -0.3708127 | 0.039 | 0.299 | 5.73E-85 | 10 | SRGN     | Immune/Neutrophils |
| 6.4246E-52 | -0.2514478 | 0.044 | 0.221 | 1.3E-47  | 10 | CXCR4    | Immune/Neutrophils |
| 3.0012E-45 | -0.2645184 | 0.039 | 0.196 | 6.06E-41 | 10 | AIF1     | Immune/Neutrophils |
| 6.7437E-37 | -0.3213361 | 0.027 | 0.155 | 1.36E-32 | 10 | LYZ      | Immune/Neutrophils |
| 8.9196E-23 | -0.2169299 | 0.035 | 0.126 | 1.8E-18  | 10 | C1QA     | Immune/Neutrophils |
| 1.4572E-37 | -0.238859  | 0.049 | 0.188 | 2.94E-33 | 10 | TYROBP   | Immune/Neutrophils |

|            |            |       |       |          |    |         |                    |
|------------|------------|-------|-------|----------|----|---------|--------------------|
| 5.9658E-43 | -0.2296946 | 0.069 | 0.234 | 1.21E-38 | 10 | S100A4  | Immune/Neutrophils |
| 4.195E-36  | -0.2032508 | 0.12  | 0.277 | 8.48E-32 | 10 | BTG1    | Immune/Neutrophils |
| 7.5194E-12 | -0.2031495 | 0.087 | 0.154 | 1.52E-07 | 10 | APOE    | Immune/Neutrophils |
| 1.8491E-31 | -0.2101804 | 0.215 | 0.376 | 3.74E-27 | 10 | PABPC1  | Immune/Neutrophils |
| 6.8818E-31 | -0.2598747 | 0.135 | 0.283 | 1.39E-26 | 10 | LGALS1  | Immune/Neutrophils |
| 4.6985E-18 | -0.203848  | 0.282 | 0.391 | 9.49E-14 | 10 | DUSP1   | Immune/Neutrophils |
| 1.7865E-07 | -0.2069662 | 0.135 | 0.19  | 0.00361  | 10 | MT1X    | Immune/Neutrophils |
| 7.6827E-24 | -0.2167587 | 0.498 | 0.603 | 1.55E-19 | 10 | RPS15A  | Immune/Neutrophils |
| 7.3668E-17 | -0.255959  | 0.265 | 0.361 | 1.49E-12 | 10 | CD74    | Immune/Neutrophils |
| 3.6837E-40 | -0.2517457 | 0.879 | 0.908 | 7.44E-36 | 10 | RPL21   | Immune/Neutrophils |
| 1.3272E-28 | -0.292118  | 0.569 | 0.659 | 2.68E-24 | 10 | ACTB    | Immune/Neutrophils |
| 6.7502E-45 | -0.5371607 | 0.163 | 0.333 | 1.36E-40 | 10 | HLA-DRA | Immune/Neutrophils |
| 4.2819E-44 | -0.285587  | 0.831 | 0.872 | 8.65E-40 | 10 | RPL39   | Immune/Neutrophils |
| 2.0597E-69 | -0.4044952 | 0.934 | 0.956 | 4.16E-65 | 10 | B2M     | Immune/Neutrophils |
| 1.516E-152 | -0.6350709 | 0.766 | 0.89  | 3.1E-148 | 10 | TMSB4X  | Immune/Neutrophils |
| 4.1692E-36 | -0.7079605 | 0.637 | 0.704 | 8.43E-32 | 10 | FTL     | Immune/Neutrophils |
| 1.0861E-16 | -1.3899889 | 0.083 | 0.17  | 2.19E-12 | 10 | IGKC    | Immune/Neutrophils |
| 0          | 1.45079587 | 0.99  | 0.035 | 0        | 11 | GNLY    | T cells            |
| 0          | 0.37065653 | 0.374 | 0.059 | 0        | 11 | NKG7    | T cells            |
| 0          | 0.53941646 | 0.554 | 0.147 | 0        | 11 | CCL5    | T cells            |
| 4.917E-305 | 0.2593644  | 0.258 | 0.039 | 9.9E-301 | 11 | KLRD1   | T cells            |
| 6.387E-263 | 0.22298199 | 0.21  | 0.03  | 1.3E-258 | 11 | GZMB    | T cells            |
| 1.397E-237 | 0.44291487 | 0.482 | 0.151 | 2.8E-233 | 11 | CD52    | T cells            |
| 3.113E-131 | 0.37937316 | 0.321 | 0.105 | 6.3E-127 | 11 | CCL4    | T cells            |
| 8.928E-117 | 0.3317471  | 0.471 | 0.21  | 1.8E-112 | 11 | CXCR4   | T cells            |
| 2.432E-116 | 0.30163309 | 0.422 | 0.174 | 4.9E-112 | 11 | IL32    | T cells            |
| 2.251E-106 | 0.24406878 | 0.338 | 0.126 | 4.5E-102 | 11 | CD69    | T cells            |
| 1.145E-99  | 0.21678421 | 0.314 | 0.118 | 2.31E-95 | 11 | HCST    | T cells            |
| 1.0015E-81 | 0.29346688 | 0.493 | 0.268 | 2.02E-77 | 11 | BTG1    | T cells            |
| 2.8714E-65 | 0.24550048 | 0.387 | 0.201 | 5.8E-61  | 11 | ZFP36L2 | T cells            |
| 2.7993E-60 | 0.23354175 | 0.418 | 0.225 | 5.66E-56 | 11 | S100A4  | T cells            |
| 2.7673E-51 | 0.2677639  | 0.549 | 0.368 | 5.59E-47 | 11 | PABPC1  | T cells            |
| 1.908E-111 | 0.35242766 | 0.994 | 0.954 | 3.9E-107 | 11 | B2M     | T cells            |
| 4.728E-108 | 0.29354451 | 1     | 0.997 | 9.6E-104 | 11 | MALAT1  | T cells            |
| 2.4157E-35 | 0.21644208 | 0.63  | 0.49  | 4.88E-31 | 11 | RPS26   | T cells            |
| 5.2997E-74 | 0.26791644 | 0.975 | 0.946 | 1.07E-69 | 11 | RPS27   | T cells            |
| 9.782E-46  | 0.21701938 | 0.905 | 0.848 | 1.98E-41 | 11 | RPS29   | T cells            |
| 1.1926E-30 | -0.2281896 | 0.022 | 0.132 | 2.41E-26 | 11 | CXCL2   | T cells            |
| 4.4386E-38 | -0.3245267 | 0.023 | 0.155 | 8.97E-34 | 11 | LYZ     | T cells            |
| 2.1005E-44 | -0.2184016 | 0.05  | 0.212 | 4.24E-40 | 11 | NPC2    | T cells            |
| 3.7298E-19 | -0.2528842 | 0.03  | 0.109 | 7.54E-15 | 11 | IGFBP5  | T cells            |
| 4.0311E-35 | -0.2160833 | 0.072 | 0.214 | 8.15E-31 | 11 | PSAP    | T cells            |
| 1.6722E-40 | -0.2203633 | 0.08  | 0.241 | 3.38E-36 | 11 | IFITM3  | T cells            |
| 7.7985E-34 | -0.234551  | 0.062 | 0.196 | 1.58E-29 | 11 | AIF1    | T cells            |
| 1.4185E-61 | -0.3086157 | 0.071 | 0.282 | 2.87E-57 | 11 | CST3    | T cells            |
| 3.5964E-31 | -0.2699056 | 0.05  | 0.173 | 7.27E-27 | 11 | DEFB1   | T cells            |
| 8.9065E-48 | -0.2778596 | 0.071 | 0.249 | 1.8E-43  | 11 | IGFBP7  | T cells            |
| 7.98E-30   | -0.2656421 | 0.052 | 0.173 | 1.61E-25 | 11 | WFDC2   | T cells            |

|            |            |       |       |          |    |          |         |
|------------|------------|-------|-------|----------|----|----------|---------|
| 3.903E-31  | -0.2289872 | 0.081 | 0.214 | 7.89E-27 | 11 | FXD2     | T cells |
| 6.607E-17  | -0.2386459 | 0.06  | 0.142 | 1.34E-12 | 11 | TIMP1    | T cells |
| 1.1766E-27 | -0.2713157 | 0.071 | 0.191 | 2.38E-23 | 11 | CLU      | T cells |
| 1.3351E-15 | -0.2183794 | 0.074 | 0.155 | 2.7E-11  | 11 | APOE     | T cells |
| 1.2464E-40 | -0.3432538 | 0.069 | 0.226 | 2.52E-36 | 11 | ADIRF    | T cells |
| 2.508E-41  | -0.3314639 | 0.075 | 0.234 | 5.07E-37 | 11 | ATP1B1   | T cells |
| 7.4629E-30 | -0.2229445 | 0.14  | 0.282 | 1.51E-25 | 11 | EGR1     | T cells |
| 2.9277E-45 | -0.2709519 | 0.224 | 0.417 | 5.92E-41 | 11 | ITM2B    | T cells |
| 2.5731E-15 | -0.2632751 | 0.106 | 0.191 | 5.2E-11  | 11 | MT1X     | T cells |
| 2.4086E-44 | -0.3613326 | 0.181 | 0.363 | 4.87E-40 | 11 | CD74     | T cells |
| 2.4978E-40 | -0.3194922 | 0.248 | 0.421 | 5.05E-36 | 11 | SAT1     | T cells |
| 4.3755E-44 | -0.5123995 | 0.101 | 0.271 | 8.84E-40 | 11 | SPP1     | T cells |
| 1.0593E-12 | -0.2394669 | 0.527 | 0.585 | 2.14E-08 | 11 | FOS      | T cells |
| 1.1779E-32 | -0.3249818 | 0.313 | 0.459 | 2.38E-28 | 11 | S100A6   | T cells |
| 3.7893E-21 | -0.3727323 | 0.246 | 0.36  | 7.66E-17 | 11 | MT2A     | T cells |
| 3.5277E-43 | -0.5366286 | 0.166 | 0.333 | 7.13E-39 | 11 | HLA-DRA  | T cells |
| 3.053E-40  | -0.376447  | 0.418 | 0.571 | 6.17E-36 | 11 | FTH1     | T cells |
| 1.5024E-06 | -0.4798675 | 0.168 | 0.218 | 0.03036  | 11 | MT1G     | T cells |
| 2.8676E-25 | -0.6304605 | 0.626 | 0.705 | 5.79E-21 | 11 | FTL      | T cells |
| 0          | 3.99942809 | 0.791 | 0.064 | 0        | 12 | IGLC2    | B cells |
| 0          | 3.33975612 | 0.665 | 0.046 | 0        | 12 | IGLC3    | B cells |
| 0          | 1.40859998 | 0.263 | 0.012 | 0        | 12 | IGHG2    | B cells |
| 0          | 2.22572284 | 0.743 | 0.067 | 0        | 12 | IGHG1    | B cells |
| 0          | 1.48794773 | 0.633 | 0.062 | 0        | 12 | IGHG3    | B cells |
| 0          | 0.70067773 | 0.346 | 0.022 | 0        | 12 | IGHGP    | B cells |
| 0          | 0.74157829 | 0.248 | 0.021 | 0        | 12 | IGHG4    | B cells |
| 0          | 0.43563465 | 0.359 | 0.023 | 0        | 12 | MZB1     | B cells |
| 0          | 0.57137331 | 0.312 | 0.03  | 0        | 12 | JCHAIN   | B cells |
| 2.178E-161 | 0.5067987  | 0.102 | 0.012 | 4.4E-157 | 12 | IGLV3-21 | B cells |
| 0          | 0.71996044 | 0.562 | 0.148 | 0        | 12 | SSR4     | B cells |
| 0          | 0.4070219  | 0.355 | 0.071 | 0        | 12 | XBP1     | B cells |
| 1.7614E-57 | 1.0208465  | 0.323 | 0.164 | 3.56E-53 | 12 | IGKC     | B cells |
| 3.5425E-19 | -0.2111883 | 0.118 | 0.224 | 7.16E-15 | 12 | ADIRF    | B cells |
| 7.7017E-10 | -0.2013107 | 0.081 | 0.141 | 1.56E-05 | 12 | TIMP1    | B cells |
| 8.5213E-35 | -0.2399054 | 0.249 | 0.416 | 1.72E-30 | 12 | ITM2B    | B cells |
| 2.0963E-18 | -0.2018835 | 0.304 | 0.419 | 4.24E-14 | 12 | SAT1     | B cells |
| 1.4608E-14 | -0.2054313 | 0.267 | 0.361 | 2.95E-10 | 12 | CD74     | B cells |
| 8.9985E-15 | -0.2271357 | 0.259 | 0.36  | 1.82E-10 | 12 | MT2A     | B cells |
| 2.7272E-42 | -0.3229292 | 0.272 | 0.46  | 5.51E-38 | 12 | S100A6   | B cells |
| 3.7928E-48 | -0.2350303 | 0.692 | 0.85  | 7.66E-44 | 12 | PTMA     | B cells |
| 9.312E-47  | -0.2473809 | 0.586 | 0.741 | 1.88E-42 | 12 | EEF1A1   | B cells |
| 1.7787E-17 | -0.3219285 | 0.165 | 0.269 | 3.59E-13 | 12 | SPP1     | B cells |
| 1.1543E-20 | -0.3143958 | 0.214 | 0.332 | 2.33E-16 | 12 | HLA-DRA  | B cells |
| 5.4225E-51 | -0.3252044 | 0.472 | 0.661 | 1.1E-46  | 12 | ACTB     | B cells |
| 2.2639E-38 | -0.3237899 | 0.411 | 0.571 | 4.57E-34 | 12 | FTH1     | B cells |
| 1.7758E-66 | -0.3332565 | 0.582 | 0.799 | 3.59E-62 | 12 | TMSB10   | B cells |
| 0.00080094 | -0.3107927 | 0.181 | 0.217 | 1        | 12 | MT1G     | B cells |
| 3.8686E-50 | -0.3266847 | 0.775 | 0.889 | 7.82E-46 | 12 | TMSB4X   | B cells |

|            |            |       |       |          |    |           |                       |
|------------|------------|-------|-------|----------|----|-----------|-----------------------|
| 0.00025493 | -0.3306714 | 0.692 | 0.703 | 1        | 12 | FTL       | B cells               |
| 0          | 0.51371591 | 0.425 | 0.005 | 0        | 13 | FCER1A    | Immune/Dendritic, APC |
| 0          | 0.22416935 | 0.195 | 0.002 | 0        | 13 | CD1E      | Immune/Dendritic, APC |
| 0          | 1.01116067 | 0.861 | 0.152 | 0        | 13 | HLA-DPB1  | Immune/Dendritic, APC |
| 0          | 0.7866747  | 0.778 | 0.13  | 0        | 13 | HLA-DPA1  | Immune/Dendritic, APC |
| 0          | 0.84079599 | 0.784 | 0.145 | 0        | 13 | HLA-DRB1  | Immune/Dendritic, APC |
| 0          | 0.44023327 | 0.478 | 0.048 | 0        | 13 | HLA-DQB1  | Immune/Dendritic, APC |
| 0          | 1.39980468 | 0.974 | 0.313 | 0        | 13 | HLA-DRA   | Immune/Dendritic, APC |
| 0          | 0.3888128  | 0.405 | 0.039 | 0        | 13 | HLA-DQA2  | Immune/Dendritic, APC |
| 0          | 0.45383474 | 0.502 | 0.064 | 0        | 13 | HLA-DQA1  | Immune/Dendritic, APC |
| 0          | 0.77996154 | 0.642 | 0.141 | 0        | 13 | RGS1      | Immune/Dendritic, APC |
| 0          | 0.62789697 | 0.599 | 0.109 | 0        | 13 | HLA-DRB5  | Immune/Dendritic, APC |
| 0          | 0.53355854 | 0.379 | 0.073 | 0        | 13 | AREG      | Immune/Dendritic, APC |
| 0          | 0.30658434 | 0.348 | 0.041 | 0        | 13 | RNASE6    | Immune/Dendritic, APC |
| 0          | 0.93615299 | 0.926 | 0.344 | 0        | 13 | CD74      | Immune/Dendritic, APC |
| 0          | 0.59635425 | 0.669 | 0.192 | 0        | 13 | GPX1      | Immune/Dendritic, APC |
| 0          | 0.23189513 | 0.25  | 0.029 | 0        | 13 | PHACTR1   | Immune/Dendritic, APC |
| 0          | 0.20123344 | 0.231 | 0.024 | 0        | 13 | OGFRL1    | Immune/Dendritic, APC |
| 0          | 0.30094445 | 0.351 | 0.057 | 0        | 13 | MNDA      | Immune/Dendritic, APC |
| 0          | 0.43273133 | 0.504 | 0.12  | 0        | 13 | SGK1      | Immune/Dendritic, APC |
| 0          | 0.65135068 | 0.72  | 0.266 | 0        | 13 | CST3      | Immune/Dendritic, APC |
| 0          | 0.22122242 | 0.246 | 0.034 | 0        | 13 | GPR183    | Immune/Dendritic, APC |
| 0          | 0.42629741 | 0.61  | 0.174 | 0        | 13 | TYROBP    | Immune/Dendritic, APC |
| 6.882E-254 | 0.41420302 | 0.504 | 0.143 | 1.4E-249 | 13 | LYZ       | Immune/Dendritic, APC |
| 2.213E-243 | 0.30549867 | 0.372 | 0.087 | 4.5E-239 | 13 | 11-1143G9 | Immune/Dendritic, APC |
| 3.094E-261 | 0.2212402  | 0.265 | 0.045 | 6.3E-257 | 13 | IFNGR1    | Immune/Dendritic, APC |
| 7.726E-270 | 0.24667112 | 0.316 | 0.061 | 1.6E-265 | 13 | KCTD12    | Immune/Dendritic, APC |
| 5.288E-230 | 0.29749526 | 0.354 | 0.084 | 1.1E-225 | 13 | MS4A6A    | Immune/Dendritic, APC |
| 1.102E-260 | 0.2700679  | 0.37  | 0.082 | 2.2E-256 | 13 | LST1      | Immune/Dendritic, APC |
| 2.102E-243 | 0.41974517 | 0.6   | 0.207 | 4.2E-239 | 13 | CXCR4     | Immune/Dendritic, APC |
| 9.28E-219  | 0.29011289 | 0.344 | 0.083 | 1.9E-214 | 13 | RGS2      | Immune/Dendritic, APC |
| 4.853E-245 | 0.23774724 | 0.327 | 0.069 | 9.8E-241 | 13 | HLA-DMA   | Immune/Dendritic, APC |
| 2.05E-219  | 0.21346047 | 0.263 | 0.051 | 4.1E-215 | 13 | C1orf162  | Immune/Dendritic, APC |
| 3.231E-213 | 0.25315203 | 0.356 | 0.089 | 6.5E-209 | 13 | CELF2     | Immune/Dendritic, APC |
| 5.562E-186 | 0.22988543 | 0.306 | 0.076 | 1.1E-181 | 13 | CKLF      | Immune/Dendritic, APC |
| 3.242E-226 | 0.53372795 | 0.851 | 0.516 | 6.6E-222 | 13 | RPS24     | Immune/Dendritic, APC |
| 1.112E-168 | 0.2534999  | 0.36  | 0.107 | 2.2E-164 | 13 | HERPUD1   | Immune/Dendritic, APC |
| 1.086E-215 | 0.50787257 | 0.858 | 0.522 | 2.2E-211 | 13 | RPS3A     | Immune/Dendritic, APC |
| 8.083E-157 | 0.2000851  | 0.252 | 0.061 | 1.6E-152 | 13 | ALOX5AP   | Immune/Dendritic, APC |
| 7.013E-148 | 0.22844202 | 0.31  | 0.09  | 1.4E-143 | 13 | YWHAH     | Immune/Dendritic, APC |
| 1.334E-142 | 0.34401175 | 0.623 | 0.284 | 2.7E-138 | 13 | SRGN      | Immune/Dendritic, APC |
| 9.399E-185 | 0.48927861 | 0.863 | 0.578 | 1.9E-180 | 13 | RPL26     | Immune/Dendritic, APC |
| 3.029E-151 | 0.40999937 | 0.776 | 0.461 | 6.1E-147 | 13 | RPS13     | Immune/Dendritic, APC |
| 2.659E-177 | 0.4465989  | 0.874 | 0.569 | 5.4E-173 | 13 | RPS23     | Immune/Dendritic, APC |
| 3.385E-261 | 0.59955741 | 0.995 | 0.884 | 6.8E-257 | 13 | TMSB4X    | Immune/Dendritic, APC |
| 1.037E-196 | 0.48172718 | 0.934 | 0.687 | 2.1E-192 | 13 | RPS8      | Immune/Dendritic, APC |
| 5.026E-140 | 0.24435097 | 0.494 | 0.185 | 1E-135   | 13 | AIF1      | Immune/Dendritic, APC |
| 3.229E-119 | 0.21076615 | 0.304 | 0.099 | 6.5E-115 | 13 | MEF2C     | Immune/Dendritic, APC |

|            |            |       |       |          |    |        |                       |
|------------|------------|-------|-------|----------|----|--------|-----------------------|
| 4.188E-162 | 0.42873679 | 0.882 | 0.593 | 8.5E-158 | 13 | RPS15A | Immune/Dendritic, APC |
| 2.638E-256 | 0.55354129 | 0.979 | 0.869 | 5.3E-252 | 13 | RPL39  | Immune/Dendritic, APC |
| 3.3E-135   | 0.21324688 | 0.41  | 0.142 | 6.7E-131 | 13 | FCER1G | Immune/Dendritic, APC |
| 4.689E-141 | 0.39148924 | 0.861 | 0.559 | 9.5E-137 | 13 | RPL12  | Immune/Dendritic, APC |
| 1.737E-140 | 0.38857208 | 0.838 | 0.541 | 3.5E-136 | 13 | RPL11  | Immune/Dendritic, APC |
| 4.993E-140 | 0.39054813 | 0.844 | 0.549 | 1E-135   | 13 | RPL18A | Immune/Dendritic, APC |
| 7.269E-126 | 0.34379974 | 0.791 | 0.471 | 1.5E-121 | 13 | RPS2   | Immune/Dendritic, APC |
| 4.0358E-95 | 0.2013632  | 0.296 | 0.105 | 8.16E-91 | 13 | CCL3   | Immune/Dendritic, APC |
| 3.702E-112 | 0.30223635 | 0.656 | 0.358 | 7.5E-108 | 13 | RPS11  | Immune/Dendritic, APC |
| 4.6606E-93 | 0.23706296 | 0.392 | 0.172 | 9.42E-89 | 13 | NAP1L1 | Immune/Dendritic, APC |
| 2.115E-118 | 0.35455207 | 0.821 | 0.541 | 4.3E-114 | 13 | RPL23A | Immune/Dendritic, APC |
| 1.861E-123 | 0.36577451 | 0.852 | 0.587 | 3.8E-119 | 13 | RPL28  | Immune/Dendritic, APC |
| 3.6519E-95 | 0.21598522 | 0.368 | 0.15  | 7.38E-91 | 13 | TRA2B  | Immune/Dendritic, APC |
| 5.881E-94  | 0.29851597 | 0.646 | 0.366 | 1.19E-89 | 13 | PABPC1 | Immune/Dendritic, APC |
| 3.536E-111 | 0.33257752 | 0.8   | 0.513 | 7.1E-107 | 13 | RPL35A | Immune/Dendritic, APC |
| 8.045E-103 | 0.29600871 | 0.693 | 0.401 | 1.63E-98 | 13 | UBA52  | Immune/Dendritic, APC |
| 3.172E-205 | 0.4557533  | 0.983 | 0.905 | 6.4E-201 | 13 | RPL21  | Immune/Dendritic, APC |
| 2.96E-102  | 0.31338749 | 0.776 | 0.495 | 5.98E-98 | 13 | RPL27A | Immune/Dendritic, APC |
| 4.599E-147 | 0.41347983 | 0.927 | 0.781 | 9.3E-143 | 13 | RPL10  | Immune/Dendritic, APC |
| 8.0869E-92 | 0.25879069 | 0.585 | 0.313 | 1.63E-87 | 13 | RPL30  | Immune/Dendritic, APC |
| 5.6588E-91 | 0.26586158 | 0.618 | 0.345 | 1.14E-86 | 13 | RPL27  | Immune/Dendritic, APC |
| 2.035E-203 | 0.44201094 | 0.991 | 0.946 | 4.1E-199 | 13 | RPL34  | Immune/Dendritic, APC |
| 5.627E-137 | 0.37208664 | 0.937 | 0.76  | 1.1E-132 | 13 | RPL32  | Immune/Dendritic, APC |
| 1.593E-144 | 0.38144203 | 0.954 | 0.8   | 3.2E-140 | 13 | RPS19  | Immune/Dendritic, APC |
| 6.0913E-74 | 0.24458673 | 0.528 | 0.286 | 1.23E-69 | 13 | TXNIP  | Immune/Dendritic, APC |
| 2.82E-136  | 0.36934507 | 0.939 | 0.78  | 5.7E-132 | 13 | RPS15  | Immune/Dendritic, APC |
| 6.376E-105 | 0.31758046 | 0.868 | 0.624 | 1.3E-100 | 13 | RPL35  | Immune/Dendritic, APC |
| 1.296E-135 | 0.37050801 | 0.954 | 0.81  | 2.6E-131 | 13 | RPS18  | Immune/Dendritic, APC |
| 4.7548E-80 | 0.23715458 | 0.556 | 0.304 | 9.61E-76 | 13 | RPL23  | Immune/Dendritic, APC |
| 1.6054E-92 | 0.3036885  | 0.838 | 0.589 | 3.24E-88 | 13 | RPS6   | Immune/Dendritic, APC |
| 4.077E-115 | 0.33925324 | 0.892 | 0.707 | 8.2E-111 | 13 | RPS14  | Immune/Dendritic, APC |
| 1.8639E-77 | 0.25808422 | 0.64  | 0.386 | 3.77E-73 | 13 | RPL37  | Immune/Dendritic, APC |
| 2.8955E-83 | 0.2668197  | 0.727 | 0.458 | 5.85E-79 | 13 | RPS17  | Immune/Dendritic, APC |
| 4.9761E-72 | 0.25493601 | 0.621 | 0.374 | 1.01E-67 | 13 | H3F3A  | Immune/Dendritic, APC |
| 3.1984E-79 | 0.26101058 | 0.69  | 0.426 | 6.46E-75 | 13 | RPL31  | Immune/Dendritic, APC |
| 2.6624E-71 | 0.26284806 | 0.689 | 0.444 | 5.38E-67 | 13 | RPS4X  | Immune/Dendritic, APC |
| 3.1453E-74 | 0.27184375 | 0.732 | 0.489 | 6.36E-70 | 13 | RPL7   | Immune/Dendritic, APC |
| 2.7157E-83 | 0.28401118 | 0.829 | 0.586 | 5.49E-79 | 13 | RPLP2  | Immune/Dendritic, APC |
| 1.716E-123 | 0.34014126 | 0.954 | 0.818 | 3.5E-119 | 13 | RPL13  | Immune/Dendritic, APC |
| 5.4894E-77 | 0.27133049 | 0.8   | 0.557 | 1.11E-72 | 13 | RPS25  | Immune/Dendritic, APC |
| 2.4393E-69 | 0.25017642 | 0.66  | 0.424 | 4.93E-65 | 13 | FAU    | Immune/Dendritic, APC |
| 8.227E-130 | 0.33792826 | 0.964 | 0.847 | 1.7E-125 | 13 | RPS29  | Immune/Dendritic, APC |
| 1.363E-157 | 0.36180599 | 0.994 | 0.945 | 2.8E-153 | 13 | RPS27  | Immune/Dendritic, APC |
| 9.163E-110 | 0.31598913 | 0.923 | 0.767 | 1.9E-105 | 13 | RPS27A | Immune/Dendritic, APC |
| 3.206E-66  | 0.21849017 | 0.572 | 0.331 | 6.48E-62 | 13 | RPL10A | Immune/Dendritic, APC |
| 3.48E-66   | 0.23979589 | 0.661 | 0.42  | 7.03E-62 | 13 | RPL15  | Immune/Dendritic, APC |
| 4.5236E-64 | 0.24846436 | 0.657 | 0.434 | 9.14E-60 | 13 | RPL9   | Immune/Dendritic, APC |
| 1.645E-100 | 0.31659626 | 0.939 | 0.791 | 3.32E-96 | 13 | RPL13A | Immune/Dendritic, APC |

|            |            |       |       |          |    |          |                       |
|------------|------------|-------|-------|----------|----|----------|-----------------------|
| 2.3206E-64 | 0.23153725 | 0.627 | 0.389 | 4.69E-60 | 13 | RPS5     | Immune/Dendritic, APC |
| 3.3182E-67 | 0.20131128 | 0.524 | 0.284 | 6.71E-63 | 13 | CYBA     | Immune/Dendritic, APC |
| 4.7064E-65 | 0.21171314 | 0.543 | 0.311 | 9.51E-61 | 13 | RPS7     | Immune/Dendritic, APC |
| 7.2691E-64 | 0.24768256 | 0.677 | 0.454 | 1.47E-59 | 13 | RPL19    | Immune/Dendritic, APC |
| 6.553E-63  | 0.22294435 | 0.66  | 0.419 | 1.32E-58 | 13 | RPS3     | Immune/Dendritic, APC |
| 3.7017E-69 | 0.25796038 | 0.819 | 0.605 | 7.48E-65 | 13 | RPS12    | Immune/Dendritic, APC |
| 1.9902E-62 | 0.25052125 | 0.78  | 0.56  | 4.02E-58 | 13 | TPT1     | Immune/Dendritic, APC |
| 4.4188E-83 | 0.28492573 | 0.944 | 0.79  | 8.93E-79 | 13 | TMSB10   | Immune/Dendritic, APC |
| 2.482E-59  | 0.20393741 | 0.581 | 0.351 | 5.02E-55 | 13 | RPL18    | Immune/Dendritic, APC |
| 8.7247E-54 | 0.20986282 | 0.631 | 0.41  | 1.76E-49 | 13 | RPS20    | Immune/Dendritic, APC |
| 2.3355E-46 | 0.25646095 | 0.817 | 0.653 | 4.72E-42 | 13 | ACTB     | Immune/Dendritic, APC |
| 1.6418E-59 | 0.23717328 | 0.836 | 0.633 | 3.32E-55 | 13 | RPL36    | Immune/Dendritic, APC |
| 1.6372E-45 | 0.20160903 | 0.632 | 0.411 | 3.31E-41 | 13 | SAT1     | Immune/Dendritic, APC |
| 6.0354E-48 | 0.22756156 | 0.776 | 0.578 | 1.22E-43 | 13 | FOS      | Immune/Dendritic, APC |
| 2.7966E-56 | 0.22803226 | 0.842 | 0.664 | 5.65E-52 | 13 | RPS28    | Immune/Dendritic, APC |
| 4.0106E-67 | 0.24112047 | 0.916 | 0.8   | 8.1E-63  | 13 | RPLP1    | Immune/Dendritic, APC |
| 7.8497E-75 | 0.24663548 | 0.968 | 0.871 | 1.59E-70 | 13 | RPL41    | Immune/Dendritic, APC |
| 8.2947E-61 | 0.24519382 | 0.929 | 0.844 | 1.68E-56 | 13 | PTMA     | Immune/Dendritic, APC |
| 6.5671E-20 | -0.202927  | 0.026 | 0.106 | 1.33E-15 | 13 | CTGF     | Immune/Dendritic, APC |
| 9.1361E-39 | -0.3078866 | 0.032 | 0.173 | 1.85E-34 | 13 | WFDC2    | Immune/Dendritic, APC |
| 1.4915E-48 | -0.2955868 | 0.042 | 0.215 | 3.01E-44 | 13 | FXD2     | Immune/Dendritic, APC |
| 2.462E-37  | -0.2960773 | 0.035 | 0.173 | 4.98E-33 | 13 | DEFB1    | Immune/Dendritic, APC |
| 1.8153E-20 | -0.2678151 | 0.026 | 0.109 | 3.67E-16 | 13 | IGFBP5   | Immune/Dendritic, APC |
| 1.893E-56  | -0.3090618 | 0.052 | 0.25  | 3.83E-52 | 13 | IGFBP7   | Immune/Dendritic, APC |
| 4.7022E-54 | -0.3954834 | 0.04  | 0.226 | 9.5E-50  | 13 | ADIRF    | Immune/Dendritic, APC |
| 1.8563E-37 | -0.3089183 | 0.047 | 0.192 | 3.75E-33 | 13 | CLU      | Immune/Dendritic, APC |
| 1.0443E-36 | -0.2192914 | 0.086 | 0.239 | 2.11E-32 | 13 | DSTN     | Immune/Dendritic, APC |
| 3.8781E-23 | -0.2002966 | 0.095 | 0.207 | 7.84E-19 | 13 | CTSD     | Immune/Dendritic, APC |
| 1.2388E-33 | -0.3290567 | 0.094 | 0.233 | 2.5E-29  | 13 | ATP1B1   | Immune/Dendritic, APC |
| 3.1426E-08 | -0.213526  | 0.089 | 0.141 | 0.000635 | 13 | TIMP1    | Immune/Dendritic, APC |
| 1.3137E-49 | -0.5424431 | 0.087 | 0.271 | 2.65E-45 | 13 | SPP1     | Immune/Dendritic, APC |
| 2.0077E-52 | -0.211236  | 1     | 1     | 4.06E-48 | 13 | MT-CO3   | Immune/Dendritic, APC |
| 3.4691E-15 | -0.2218267 | 0.813 | 0.7   | 7.01E-11 | 13 | FTL      | Immune/Dendritic, APC |
| 9.597E-36  | -0.3727861 | 0.32  | 0.458 | 1.94E-31 | 13 | S100A6   | Immune/Dendritic, APC |
| 9.6251E-42 | -0.3002711 | 0.834 | 0.888 | 1.95E-37 | 13 | MT-ND5   | Immune/Dendritic, APC |
| 6.3381E-45 | -0.2945358 | 0.927 | 0.953 | 1.28E-40 | 13 | MT-ND1   | Immune/Dendritic, APC |
| 1.3673E-32 | -0.3167031 | 0.748 | 0.794 | 2.76E-28 | 13 | MT-ND4L  | Immune/Dendritic, APC |
| 2.4976E-06 | -0.5053015 | 0.172 | 0.218 | 0.050472 | 13 | MT1G     | Immune/Dendritic, APC |
| 0.00040919 | -1.447616  | 0.137 | 0.168 | 1        | 13 | IGKC     | Immune/Dendritic, APC |
| 0          | 1.22963681 | 0.685 | 0.013 | 0        | 14 | RGS5     | vSMCs                 |
| 0          | 0.43987797 | 0.291 | 0.002 | 0        | 14 | RERGL    | vSMCs                 |
| 0          | 0.33961616 | 0.252 | 0.003 | 0        | 14 | PLN      | vSMCs                 |
| 0          | 0.41803454 | 0.343 | 0.012 | 0        | 14 | ACTA2    | vSMCs                 |
| 0          | 0.31285381 | 0.266 | 0.008 | 0        | 14 | MYH11    | vSMCs                 |
| 0          | 0.66138313 | 0.486 | 0.041 | 0        | 14 | TAGLN    | vSMCs                 |
| 0          | 1.25256406 | 0.76  | 0.209 | 0        | 14 | ADIRF    | vSMCs                 |
| 0          | 0.25540735 | 0.219 | 0.013 | 0        | 14 | C11orf96 | vSMCs                 |
| 0          | 0.21505094 | 0.21  | 0.012 | 0        | 14 | PLAC9    | vSMCs                 |

|            |            |       |       |          |    |         |                     |
|------------|------------|-------|-------|----------|----|---------|---------------------|
| 0          | 0.63569756 | 0.559 | 0.096 | 0        | 14 | CALD1   | vSMCs               |
| 0          | 0.48314912 | 0.434 | 0.061 | 0        | 14 | MYL9    | vSMCs               |
| 0          | 0.31859308 | 0.29  | 0.031 | 0        | 14 | TPM2    | vSMCs               |
| 0          | 0.47410217 | 0.41  | 0.086 | 0        | 14 | TIMP3   | vSMCs               |
| 7.567E-237 | 0.20737882 | 0.175 | 0.022 | 1.5E-232 | 14 | PTN     | vSMCs               |
| 1.825E-295 | 0.20579424 | 0.214 | 0.027 | 3.7E-291 | 14 | MYLK    | vSMCs               |
| 2.547E-258 | 0.34307812 | 0.392 | 0.09  | 5.1E-254 | 14 | MGP     | vSMCs               |
| 1.704E-187 | 0.49961391 | 0.563 | 0.227 | 3.4E-183 | 14 | DSTN    | vSMCs               |
| 2.587E-199 | 0.31281621 | 0.372 | 0.097 | 5.2E-195 | 14 | SPARCL1 | vSMCs               |
| 6.741E-213 | 0.29150558 | 0.393 | 0.1   | 1.4E-208 | 14 | IGFBP5  | vSMCs               |
| 9.576E-174 | 0.27298133 | 0.315 | 0.083 | 1.9E-169 | 14 | TSC22D1 | vSMCs               |
| 9.798E-105 | 0.59401112 | 0.611 | 0.351 | 2E-100   | 14 | MT2A    | vSMCs               |
| 1.563E-144 | 0.34573673 | 0.384 | 0.132 | 3.2E-140 | 14 | CRIP1   | vSMCs               |
| 3.519E-163 | 0.20624354 | 0.247 | 0.056 | 7.1E-159 | 14 | CAV1    | vSMCs               |
| 9.4765E-95 | 0.29431671 | 0.501 | 0.239 | 1.92E-90 | 14 | IGFBP7  | vSMCs               |
| 2.539E-56  | 0.30056004 | 0.466 | 0.274 | 5.13E-52 | 14 | EGR1    | vSMCs               |
| 2.293E-66  | 0.24479023 | 0.356 | 0.172 | 4.63E-62 | 14 | RHOB    | vSMCs               |
| 1.9903E-63 | 0.21605891 | 0.494 | 0.274 | 4.02E-59 | 14 | LGALS1  | vSMCs               |
| 1.5082E-36 | -0.237831  | 0.044 | 0.188 | 3.05E-32 | 14 | TYROBP  | vSMCs               |
| 1.041E-30  | -0.2276894 | 0.064 | 0.195 | 2.1E-26  | 14 | AIF1    | vSMCs               |
| 2.4281E-27 | -0.2834812 | 0.041 | 0.155 | 4.91E-23 | 14 | LYZ     | vSMCs               |
| 3.4869E-41 | -0.2379705 | 0.117 | 0.294 | 7.05E-37 | 14 | CYBA    | vSMCs               |
| 2.3782E-10 | -0.2005597 | 0.09  | 0.154 | 4.81E-06 | 14 | APOE    | vSMCs               |
| 7.7202E-23 | -0.206894  | 0.171 | 0.295 | 1.56E-18 | 14 | SRGN    | vSMCs               |
| 4.1399E-24 | -0.2151919 | 0.498 | 0.612 | 8.37E-20 | 14 | RPS12   | vSMCs               |
| 1.0071E-22 | -0.2146163 | 0.493 | 0.603 | 2.04E-18 | 14 | RPS15A  | vSMCs               |
| 9.8647E-38 | -0.3109742 | 0.244 | 0.42  | 1.99E-33 | 14 | SAT1    | vSMCs               |
| 4.6644E-40 | -0.3598779 | 0.187 | 0.362 | 9.43E-36 | 14 | CD74    | vSMCs               |
| 6.5692E-21 | -0.2041088 | 0.753 | 0.805 | 1.33E-16 | 14 | RPS19   | vSMCs               |
| 4.567E-40  | -0.2654902 | 0.438 | 0.597 | 9.23E-36 | 14 | RPL28   | vSMCs               |
| 4.5499E-22 | -0.2298196 | 0.601 | 0.695 | 9.19E-18 | 14 | NEAT1   | vSMCs               |
| 9.2428E-43 | -0.2432719 | 0.73  | 0.852 | 1.87E-38 | 14 | RPS29   | vSMCs               |
| 2.7788E-06 | -0.226961  | 0.547 | 0.568 | 0.056153 | 14 | FTH1    | vSMCs               |
| 6.4178E-16 | -0.3647672 | 0.168 | 0.269 | 1.3E-11  | 14 | SPP1    | vSMCs               |
| 1.0715E-41 | -0.5140179 | 0.159 | 0.333 | 2.17E-37 | 14 | HLA-DRA | vSMCs               |
| 2.446E-38  | -0.2745279 | 0.826 | 0.872 | 4.94E-34 | 14 | RPL39   | vSMCs               |
| 1.224E-28  | -0.2987933 | 0.96  | 0.955 | 2.47E-24 | 14 | B2M     | vSMCs               |
| 1.5412E-65 | -0.3809012 | 0.634 | 0.797 | 3.11E-61 | 14 | TMSB10  | vSMCs               |
| 6.8187E-06 | -0.4860968 | 0.171 | 0.218 | 0.137791 | 14 | MT1G    | vSMCs               |
| 6.9804E-35 | -0.6725964 | 0.61  | 0.705 | 1.41E-30 | 14 | FTL     | vSMCs               |
| 0.00027892 | -1.3395391 | 0.133 | 0.168 | 1        | 14 | IGKC    | vSMCs               |
| 0          | 0.98387256 | 0.664 | 0.016 | 0        | 15 | AQP2    | Principal cells, PC |
| 0          | 1.34079188 | 0.847 | 0.028 | 0        | 15 | FXYP4   | Principal cells, PC |
| 0          | 0.67970112 | 0.479 | 0.015 | 0        | 15 | AQP3    | Principal cells, PC |
| 0          | 0.204436   | 0.195 | 0.006 | 0        | 15 | PAPPA   | Principal cells, PC |
| 0          | 0.21009904 | 0.217 | 0.014 | 0        | 15 | SMIM22  | Principal cells, PC |
| 0          | 0.31049011 | 0.31  | 0.035 | 0        | 15 | KRT19   | Principal cells, PC |
| 0          | 0.23764326 | 0.239 | 0.021 | 0        | 15 | GATA3   | Principal cells, PC |

|            |            |       |       |          |    |          |                     |
|------------|------------|-------|-------|----------|----|----------|---------------------|
| 0          | 0.33647572 | 0.371 | 0.055 | 0        | 15 | CDH16    | Principal cells, PC |
| 0          | 0.22423538 | 0.227 | 0.023 | 0        | 15 | ST6GAL1  | Principal cells, PC |
| 0          | 0.20876117 | 0.216 | 0.021 | 0        | 15 | HSD11B2  | Principal cells, PC |
| 5.103E-295 | 0.26102788 | 0.293 | 0.046 | 1E-290   | 15 | EPCAM    | Principal cells, PC |
| 6.628E-182 | 0.20574581 | 0.188 | 0.03  | 1.3E-177 | 15 | STC1     | Principal cells, PC |
| 5.382E-197 | 0.21984951 | 0.247 | 0.046 | 1.1E-192 | 15 | TACSTD2  | Principal cells, PC |
| 1.485E-164 | 0.34019171 | 0.457 | 0.151 | 3E-160   | 15 | CD24     | Principal cells, PC |
| 4.957E-154 | 0.40103332 | 0.567 | 0.223 | 1E-149   | 15 | ATP1B1   | Principal cells, PC |
| 1.673E-165 | 0.31000142 | 0.497 | 0.163 | 3.4E-161 | 15 | WFDC2    | Principal cells, PC |
| 8.035E-121 | 0.2569733  | 0.373 | 0.132 | 1.6E-116 | 15 | NGFRAP1  | Principal cells, PC |
| 3.94E-109  | 0.20009461 | 0.282 | 0.087 | 8E-105   | 15 | EMX2     | Principal cells, PC |
| 1.0839E-84 | 0.26831402 | 0.365 | 0.151 | 2.19E-80 | 15 | HES1     | Principal cells, PC |
| 2.637E-105 | 0.22578882 | 0.431 | 0.164 | 5.3E-101 | 15 | DEFB1    | Principal cells, PC |
| 2.2468E-94 | 0.21339118 | 0.441 | 0.183 | 4.54E-90 | 15 | CLU      | Principal cells, PC |
| 9.7873E-51 | 0.31445846 | 0.903 | 0.79  | 1.98E-46 | 15 | MT-ND4L  | Principal cells, PC |
| 6.362E-72  | 0.30938547 | 0.966 | 0.885 | 1.29E-67 | 15 | MT-ND5   | Principal cells, PC |
| 6.9141E-72 | 0.28338781 | 0.989 | 0.951 | 1.4E-67  | 15 | MT-ND1   | Principal cells, PC |
| 5.427E-89  | 0.2693308  | 1     | 1     | 1.1E-84  | 15 | MT-CO1   | Principal cells, PC |
| 6.0429E-32 | 0.26767099 | 1     | 0.997 | 1.22E-27 | 15 | MALAT1   | Principal cells, PC |
| 3.0356E-58 | 0.21322514 | 0.999 | 0.996 | 6.13E-54 | 15 | MT-ND2   | Principal cells, PC |
| 1.25E-47   | 0.20506909 | 1     | 0.998 | 2.53E-43 | 15 | MT-ND3   | Principal cells, PC |
| 1.9552E-22 | -0.2033645 | 0.019 | 0.111 | 3.95E-18 | 15 | CCL3     | Principal cells, PC |
| 2.6518E-21 | -0.208493  | 0.018 | 0.106 | 5.36E-17 | 15 | CTGF     | Principal cells, PC |
| 7.2956E-32 | -0.2006564 | 0.038 | 0.172 | 1.47E-27 | 15 | HLA-DPB1 | Principal cells, PC |
| 2.9174E-40 | -0.2628711 | 0.036 | 0.196 | 5.9E-36  | 15 | AIF1     | Principal cells, PC |
| 2.7201E-35 | -0.2404808 | 0.042 | 0.188 | 5.5E-31  | 15 | TYROBP   | Principal cells, PC |
| 1.7944E-21 | -0.2273922 | 0.032 | 0.126 | 3.63E-17 | 15 | C1QA     | Principal cells, PC |
| 1.3717E-49 | -0.2535755 | 0.061 | 0.259 | 2.77E-45 | 15 | VIM      | Principal cells, PC |
| 1.611E-37  | -0.2235676 | 0.06  | 0.22  | 3.26E-33 | 15 | CXCR4    | Principal cells, PC |
| 1.916E-35  | -0.2086865 | 0.068 | 0.225 | 3.87E-31 | 15 | NFKBIA   | Principal cells, PC |
| 3.3373E-22 | -0.2022321 | 0.054 | 0.159 | 6.74E-18 | 15 | CCL5     | Principal cells, PC |
| 9.4684E-63 | -0.3255914 | 0.064 | 0.297 | 1.91E-58 | 15 | SRGN     | Principal cells, PC |
| 1.7175E-25 | -0.2841864 | 0.041 | 0.155 | 3.47E-21 | 15 | LYZ      | Principal cells, PC |
| 7.7882E-20 | -0.2464572 | 0.045 | 0.142 | 1.57E-15 | 15 | TIMP1    | Principal cells, PC |
| 6.788E-39  | -0.2264013 | 0.113 | 0.294 | 1.37E-34 | 15 | CYBA     | Principal cells, PC |
| 2.6468E-12 | -0.2081139 | 0.079 | 0.154 | 5.35E-08 | 15 | APOE     | Principal cells, PC |
| 1.9305E-43 | -0.2411933 | 0.161 | 0.363 | 3.9E-39  | 15 | HLA-B    | Principal cells, PC |
| 2.7384E-28 | -0.2191827 | 0.218 | 0.376 | 5.53E-24 | 15 | PABPC1   | Principal cells, PC |
| 7.2879E-27 | -0.2053208 | 0.276 | 0.428 | 1.47E-22 | 15 | RPS3     | Principal cells, PC |
| 2.847E-26  | -0.2009104 | 0.322 | 0.472 | 5.75E-22 | 15 | RPS13    | Principal cells, PC |
| 3.4151E-31 | -0.2139014 | 0.335 | 0.505 | 6.9E-27  | 15 | RPL27A   | Principal cells, PC |
| 1.5415E-30 | -0.3157769 | 0.131 | 0.282 | 3.12E-26 | 15 | LGALS1   | Principal cells, PC |
| 6.142E-28  | -0.2145072 | 0.343 | 0.497 | 1.24E-23 | 15 | RPS26    | Principal cells, PC |
| 7.3684E-49 | -0.3383205 | 0.179 | 0.392 | 1.49E-44 | 15 | DUSP1    | Principal cells, PC |
| 5.3367E-10 | -0.2478427 | 0.12  | 0.19  | 1.08E-05 | 15 | MT1X     | Principal cells, PC |
| 8.1588E-27 | -0.2133094 | 0.449 | 0.595 | 1.65E-22 | 15 | RPLP2    | Principal cells, PC |
| 2.3773E-25 | -0.2204704 | 0.395 | 0.533 | 4.8E-21  | 15 | RPS3A    | Principal cells, PC |
| 3.3675E-34 | -0.2434913 | 0.379 | 0.552 | 6.81E-30 | 15 | RPL23A   | Principal cells, PC |

|            |            |       |       |          |    |          |                     |
|------------|------------|-------|-------|----------|----|----------|---------------------|
| 2.327E-48  | -0.3097615 | 0.269 | 0.483 | 4.7E-44  | 15 | RPS2     | Principal cells, PC |
| 2.0205E-46 | -0.387744  | 0.162 | 0.363 | 4.08E-42 | 15 | CD74     | Principal cells, PC |
| 1.5551E-25 | -0.2096159 | 0.559 | 0.671 | 3.14E-21 | 15 | RPS28    | Principal cells, PC |
| 5.4553E-27 | -0.2021726 | 0.793 | 0.851 | 1.1E-22  | 15 | RPS29    | Principal cells, PC |
| 1.1993E-34 | -0.2596565 | 0.431 | 0.589 | 2.42E-30 | 15 | RPL26    | Principal cells, PC |
| 2.0389E-31 | -0.2181667 | 0.698 | 0.786 | 4.12E-27 | 15 | RPS15    | Principal cells, PC |
| 1.2393E-45 | -0.2914483 | 0.381 | 0.57  | 2.5E-41  | 15 | TPT1     | Principal cells, PC |
| 1.1685E-22 | -0.2123634 | 0.703 | 0.766 | 2.36E-18 | 15 | RPL32    | Principal cells, PC |
| 7.2039E-26 | -0.2041707 | 0.809 | 0.847 | 1.46E-21 | 15 | PTMA     | Principal cells, PC |
| 2.5169E-45 | -0.2987125 | 0.369 | 0.56  | 5.09E-41 | 15 | RPL18A   | Principal cells, PC |
| 5.0146E-33 | -0.2570944 | 0.471 | 0.613 | 1.01E-28 | 15 | RPS12    | Principal cells, PC |
| 2.2329E-20 | -0.223076  | 0.633 | 0.694 | 4.51E-16 | 15 | RPS8     | Principal cells, PC |
| 4.1505E-19 | -0.2025056 | 0.951 | 0.946 | 8.39E-15 | 15 | RPS27    | Principal cells, PC |
| 4.2532E-58 | -0.6034527 | 0.114 | 0.334 | 8.59E-54 | 15 | HLA-DRA  | Principal cells, PC |
| 3.8989E-50 | -0.3081021 | 0.402 | 0.598 | 7.88E-46 | 15 | RPL28    | Principal cells, PC |
| 3.0168E-22 | -0.2108128 | 0.947 | 0.947 | 6.1E-18  | 15 | RPL34    | Principal cells, PC |
| 4.7512E-47 | -0.3161012 | 0.412 | 0.605 | 9.6E-43  | 15 | RPS15A   | Principal cells, PC |
| 4.512E-35  | -0.251646  | 0.712 | 0.796 | 9.12E-31 | 15 | RPL13A   | Principal cells, PC |
| 1.2667E-18 | -0.3598746 | 0.24  | 0.36  | 2.56E-14 | 15 | MT2A     | Principal cells, PC |
| 4.2782E-40 | -0.2672404 | 0.757 | 0.822 | 8.65E-36 | 15 | RPL13    | Principal cells, PC |
| 1.3224E-33 | -0.2748852 | 0.748 | 0.815 | 2.67E-29 | 15 | RPS18    | Principal cells, PC |
| 5.6223E-49 | -0.3984154 | 0.381 | 0.588 | 1.14E-44 | 15 | FOS      | Principal cells, PC |
| 4.7769E-60 | -0.3129956 | 0.679 | 0.806 | 9.65E-56 | 15 | RPLP1    | Principal cells, PC |
| 7.5586E-43 | -0.3015536 | 0.708 | 0.787 | 1.53E-38 | 15 | RPL10    | Principal cells, PC |
| 8.1964E-37 | -0.3872087 | 0.413 | 0.571 | 1.66E-32 | 15 | FTH1     | Principal cells, PC |
| 1.5362E-35 | -0.3464638 | 0.55  | 0.659 | 3.1E-31  | 15 | ACTB     | Principal cells, PC |
| 4.4463E-56 | -0.3396115 | 0.702 | 0.806 | 8.99E-52 | 15 | RPS19    | Principal cells, PC |
| 5.0068E-62 | -0.3682148 | 0.809 | 0.873 | 1.01E-57 | 15 | RPL39    | Principal cells, PC |
| 1.2972E-32 | -0.3498006 | 0.91  | 0.886 | 2.62E-28 | 15 | TMSB4X   | Principal cells, PC |
| 1.7016E-08 | -0.5252187 | 0.154 | 0.218 | 0.000344 | 15 | MT1G     | Principal cells, PC |
| 5.4609E-80 | -0.4511928 | 0.657 | 0.796 | 1.1E-75  | 15 | TMSB10   | Principal cells, PC |
| 6.5835E-65 | -0.8501857 | 0.533 | 0.706 | 1.33E-60 | 15 | FTL      | Principal cells, PC |
| 6.524E-216 | -0.8701571 | 0.87  | 0.957 | 1.3E-211 | 15 | B2M      | Principal cells, PC |
| 6.5136E-13 | -1.4991869 | 0.091 | 0.169 | 1.32E-08 | 15 | IGKC     | Principal cells, PC |
| 0          | 1.95606124 | 0.983 | 0.089 | 0        | 16 | IGFBP5   | Endothelial cells   |
| 0          | 0.41137414 | 0.302 | 0.006 | 0        | 16 | CRHBP    | Endothelial cells   |
| 0          | 0.95438534 | 0.583 | 0.042 | 0        | 16 | EMCN     | Endothelial cells   |
| 0          | 0.44163434 | 0.355 | 0.018 | 0        | 16 | PLAT     | Endothelial cells   |
| 0          | 0.39237466 | 0.338 | 0.022 | 0        | 16 | PLPP3    | Endothelial cells   |
| 0          | 0.21377153 | 0.189 | 0.007 | 0        | 16 | SOST     | Endothelial cells   |
| 0          | 0.3699512  | 0.335 | 0.031 | 0        | 16 | PLPP1    | Endothelial cells   |
| 0          | 0.26008197 | 0.254 | 0.018 | 0        | 16 | PTPRB    | Endothelial cells   |
| 0          | 0.57651985 | 0.482 | 0.085 | 0        | 16 | TIMP3    | Endothelial cells   |
| 0          | 0.54284224 | 0.477 | 0.081 | 0        | 16 | TGFBR2   | Endothelial cells   |
| 0          | 0.4374956  | 0.412 | 0.06  | 0        | 16 | EPAS1    | Endothelial cells   |
| 0          | 0.23999967 | 0.242 | 0.02  | 0        | 16 | FLT1     | Endothelial cells   |
| 0          | 0.28477705 | 0.272 | 0.027 | 0        | 16 | SLC9A3R2 | Endothelial cells   |
| 0          | 0.30909485 | 0.289 | 0.033 | 0        | 16 | PBX1     | Endothelial cells   |

|            |            |       |       |          |    |        |                   |
|------------|------------|-------|-------|----------|----|--------|-------------------|
| 0          | 0.21356531 | 0.212 | 0.018 | 0        | 16 | LDB2   | Endothelial cells |
| 0          | 0.26567247 | 0.264 | 0.028 | 0        | 16 | SDPR   | Endothelial cells |
| 8.632E-285 | 0.4989242  | 0.463 | 0.11  | 1.7E-280 | 16 | IFI27  | Endothelial cells |
| 1.403E-307 | 0.2850666  | 0.296 | 0.044 | 2.8E-303 | 16 | ADGRF5 | Endothelial cells |
| 2.765E-203 | 0.28584596 | 0.312 | 0.068 | 5.6E-199 | 16 | SPTBN1 | Endothelial cells |
| 9.879E-162 | 0.32265679 | 0.344 | 0.092 | 2E-157   | 16 | MGP    | Endothelial cells |
| 2.932E-191 | 0.28960636 | 0.344 | 0.083 | 5.9E-187 | 16 | GNG11  | Endothelial cells |
| 8.475E-161 | 0.34188507 | 0.411 | 0.131 | 1.7E-156 | 16 | APP    | Endothelial cells |
| 5.988E-152 | 0.28300604 | 0.362 | 0.105 | 1.2E-147 | 16 | SPARC  | Endothelial cells |
| 1.312E-117 | 0.22019966 | 0.268 | 0.076 | 2.7E-113 | 16 | IL6ST  | Endothelial cells |
| 3.024E-119 | 0.21621588 | 0.278 | 0.079 | 6.1E-115 | 16 | CNN3   | Endothelial cells |
| 1.901E-103 | 0.23968175 | 0.318 | 0.105 | 3.8E-99  | 16 | RNASE1 | Endothelial cells |
| 1.1367E-82 | 0.29514307 | 0.482 | 0.232 | 2.3E-78  | 16 | IFITM3 | Endothelial cells |
| 3.7907E-34 | 0.21250938 | 0.444 | 0.288 | 7.66E-30 | 16 | TXNIP  | Endothelial cells |
| 1.8617E-34 | 0.26721294 | 0.979 | 0.955 | 3.76E-30 | 16 | B2M    | Endothelial cells |
| 1.0489E-18 | -0.2204931 | 0.036 | 0.126 | 2.12E-14 | 16 | C1QA   | Endothelial cells |
| 1.9912E-29 | -0.2308511 | 0.053 | 0.187 | 4.02E-25 | 16 | TYROBP | Endothelial cells |
| 7.8115E-26 | -0.3028632 | 0.038 | 0.154 | 1.58E-21 | 16 | LYZ    | Endothelial cells |
| 1.0351E-27 | -0.2343804 | 0.063 | 0.195 | 2.09E-23 | 16 | AIF1   | Endothelial cells |
| 1.27E-31   | -0.2380289 | 0.119 | 0.28  | 2.57E-27 | 16 | CST3   | Endothelial cells |
| 5.544E-18  | -0.2061599 | 0.183 | 0.294 | 1.12E-13 | 16 | SRGN   | Endothelial cells |
| 2.1651E-25 | -0.2142128 | 0.429 | 0.569 | 4.38E-21 | 16 | RPL12  | Endothelial cells |
| 0.00034929 | -0.2071604 | 0.151 | 0.19  | 1        | 16 | MT1X   | Endothelial cells |
| 8.2455E-30 | -0.2498592 | 0.321 | 0.482 | 1.67E-25 | 16 | RPS2   | Endothelial cells |
| 2.9772E-39 | -0.3295848 | 0.223 | 0.42  | 6.02E-35 | 16 | SAT1   | Endothelial cells |
| 4.1321E-33 | -0.254204  | 0.444 | 0.597 | 8.35E-29 | 16 | RPL28  | Endothelial cells |
| 8.3354E-32 | -0.2180684 | 0.812 | 0.874 | 1.68E-27 | 16 | RPL41  | Endothelial cells |
| 3.539E-20  | -0.217515  | 0.757 | 0.804 | 7.15E-16 | 16 | RPS19  | Endothelial cells |
| 1.4067E-34 | -0.2485375 | 0.71  | 0.805 | 2.84E-30 | 16 | RPLP1  | Endothelial cells |
| 2.752E-09  | -0.3311811 | 0.193 | 0.268 | 5.56E-05 | 16 | SPP1   | Endothelial cells |
| 4.7618E-33 | -0.2639505 | 0.818 | 0.872 | 9.62E-29 | 16 | RPL39  | Endothelial cells |
| 1.4303E-39 | -0.3543202 | 0.516 | 0.66  | 2.89E-35 | 16 | ACTB   | Endothelial cells |
| 7.1905E-23 | -0.3457716 | 0.47  | 0.569 | 1.45E-18 | 16 | FTH1   | Endothelial cells |
| 8.892E-58  | -0.4895995 | 0.378 | 0.588 | 1.8E-53  | 16 | FOS    | Endothelial cells |
| 0.00154741 | -0.428743  | 0.183 | 0.217 | 1        | 16 | MT1G   | Endothelial cells |
| 1.6155E-28 | -0.7077852 | 0.629 | 0.704 | 3.26E-24 | 16 | FTL    | Endothelial cells |
| 0          | 0.78014701 | 0.569 | 0.03  | 0        | 17 | ALDOB  | Proximal Tubule   |
| 0          | 1.59412757 | 0.891 | 0.121 | 0        | 17 | GPX3   | Proximal Tubule   |
| 0          | 0.42469546 | 0.348 | 0.014 | 0        | 17 | GSTA1  | Proximal Tubule   |
| 0          | 0.375678   | 0.28  | 0.01  | 0        | 17 | ALB    | Proximal Tubule   |
| 0          | 0.43773534 | 0.334 | 0.014 | 0        | 17 | PRAP1  | Proximal Tubule   |
| 0          | 0.34306544 | 0.28  | 0.011 | 0        | 17 | FABP1  | Proximal Tubule   |
| 0          | 0.25501888 | 0.207 | 0.007 | 0        | 17 | GSTA2  | Proximal Tubule   |
| 0          | 0.80008757 | 0.572 | 0.065 | 0        | 17 | GATM   | Proximal Tubule   |
| 0          | 0.20560435 | 0.182 | 0.007 | 0        | 17 | HPD    | Proximal Tubule   |
| 0          | 0.38748428 | 0.31  | 0.024 | 0        | 17 | MIOX   | Proximal Tubule   |
| 0          | 0.47506146 | 0.395 | 0.04  | 0        | 17 | UGT2B7 | Proximal Tubule   |
| 0          | 0.34768357 | 0.335 | 0.025 | 0        | 17 | ASS1   | Proximal Tubule   |

|            |            |       |       |          |    |          |                 |
|------------|------------|-------|-------|----------|----|----------|-----------------|
| 0          | 0.24282978 | 0.212 | 0.012 | 0        | 17 | CUBN     | Proximal Tubule |
| 0          | 0.49880262 | 0.437 | 0.069 | 0        | 17 | SMIM24   | Proximal Tubule |
| 0          | 0.44871891 | 0.407 | 0.058 | 0        | 17 | PDZK1IP1 | Proximal Tubule |
| 0          | 0.40107514 | 0.34  | 0.046 | 0        | 17 | SUCLG1   | Proximal Tubule |
| 0          | 0.24453498 | 0.246 | 0.022 | 0        | 17 | AK4      | Proximal Tubule |
| 7.811E-271 | 0.8319737  | 0.644 | 0.208 | 1.6E-266 | 17 | MT1G     | Proximal Tubule |
| 0          | 0.57342712 | 0.576 | 0.144 | 0        | 17 | APOE     | Proximal Tubule |
| 0          | 0.20781572 | 0.209 | 0.019 | 0        | 17 | NAT8     | Proximal Tubule |
| 6.396E-220 | 0.26184421 | 0.268 | 0.047 | 1.3E-215 | 17 | C11orf54 | Proximal Tubule |
| 5.198E-187 | 0.20680431 | 0.213 | 0.035 | 1.1E-182 | 17 | LGALS2   | Proximal Tubule |
| 2.7E-141   | 0.20824655 | 0.223 | 0.047 | 5.5E-137 | 17 | MGST1    | Proximal Tubule |
| 8.873E-127 | 0.38236764 | 0.472 | 0.183 | 1.8E-122 | 17 | MT1X     | Proximal Tubule |
| 5.588E-114 | 0.22728918 | 0.272 | 0.078 | 1.1E-109 | 17 | CYB5A    | Proximal Tubule |
| 1.317E-134 | 0.22612789 | 0.342 | 0.098 | 2.7E-130 | 17 | CXCL14   | Proximal Tubule |
| 1.1718E-84 | 0.22284813 | 0.256 | 0.082 | 2.37E-80 | 17 | MT1H     | Proximal Tubule |
| 5.4987E-84 | 0.28264445 | 0.461 | 0.206 | 1.11E-79 | 17 | FXD2     | Proximal Tubule |
| 6.9496E-74 | 0.31074396 | 0.466 | 0.24  | 1.4E-69  | 17 | UQCRCQ   | Proximal Tubule |
| 7.6964E-53 | 0.3045916  | 0.463 | 0.277 | 1.56E-48 | 17 | RPS27L   | Proximal Tubule |
| 6.5291E-55 | 0.31777013 | 0.562 | 0.372 | 1.32E-50 | 17 | COX7C    | Proximal Tubule |
| 1.444E-44  | 0.22512467 | 0.336 | 0.176 | 2.92E-40 | 17 | TXN      | Proximal Tubule |
| 6.3274E-34 | 0.20993836 | 0.366 | 0.219 | 1.28E-29 | 17 | USMG5    | Proximal Tubule |
| 5.2741E-37 | 0.23281689 | 0.546 | 0.375 | 1.07E-32 | 17 | ATP5I    | Proximal Tubule |
| 1.3472E-95 | 0.24429707 | 0.914 | 0.698 | 2.72E-91 | 17 | FTL      | Proximal Tubule |
| 5.141E-52  | 0.24781886 | 1     | 0.998 | 1.04E-47 | 17 | MT-ND3   | Proximal Tubule |
| 9.6473E-49 | 0.22994319 | 1     | 1     | 1.95E-44 | 17 | MT-CO3   | Proximal Tubule |
| 7.6755E-32 | 0.20561756 | 1     | 1     | 1.55E-27 | 17 | MT-CO1   | Proximal Tubule |
| 7.9949E-22 | -0.2201605 | 0.03  | 0.131 | 1.62E-17 | 17 | CXCL2    | Proximal Tubule |
| 1.1393E-19 | -0.2207627 | 0.032 | 0.126 | 2.3E-15  | 17 | C1QA     | Proximal Tubule |
| 4.1779E-28 | -0.2275267 | 0.053 | 0.187 | 8.44E-24 | 17 | TYROBP   | Proximal Tubule |
| 2.868E-39  | -0.2421785 | 0.078 | 0.259 | 5.8E-35  | 17 | VIM      | Proximal Tubule |
| 6.7336E-28 | -0.238967  | 0.06  | 0.195 | 1.36E-23 | 17 | AIF1     | Proximal Tubule |
| 4.9939E-22 | -0.286669  | 0.046 | 0.154 | 1.01E-17 | 17 | LYZ      | Proximal Tubule |
| 3.1814E-17 | -0.2469658 | 0.05  | 0.142 | 6.43E-13 | 17 | TIMP1    | Proximal Tubule |
| 6.9198E-17 | -0.2161608 | 0.073 | 0.172 | 1.4E-12  | 17 | DEFB1    | Proximal Tubule |
| 3.2968E-26 | -0.2119886 | 0.123 | 0.266 | 6.66E-22 | 17 | ZFP36    | Proximal Tubule |
| 7.7942E-34 | -0.2586882 | 0.112 | 0.282 | 1.58E-29 | 17 | EGR1     | Proximal Tubule |
| 3.883E-09  | -0.2199607 | 0.051 | 0.108 | 7.85E-05 | 17 | IGFBP5   | Proximal Tubule |
| 4.1065E-31 | -0.2060068 | 0.185 | 0.362 | 8.3E-27  | 17 | HLA-B    | Proximal Tubule |
| 2.2302E-25 | -0.2207581 | 0.15  | 0.295 | 4.51E-21 | 17 | SRGN     | Proximal Tubule |
| 1.1972E-32 | -0.3038337 | 0.114 | 0.282 | 2.42E-28 | 17 | LGALS1   | Proximal Tubule |
| 8.801E-30  | -0.2780134 | 0.224 | 0.391 | 1.78E-25 | 17 | DUSP1    | Proximal Tubule |
| 1.3882E-08 | -0.2034439 | 0.358 | 0.417 | 0.000281 | 17 | SAT1     | Proximal Tubule |
| 3.733E-33  | -0.3507917 | 0.19  | 0.362 | 7.54E-29 | 17 | CD74     | Proximal Tubule |
| 6.0365E-55 | -0.4088008 | 0.21  | 0.46  | 1.22E-50 | 17 | S100A6   | Proximal Tubule |
| 8.3756E-57 | -0.3424728 | 0.46  | 0.698 | 1.69E-52 | 17 | NEAT1    | Proximal Tubule |
| 9.6446E-63 | -0.3104592 | 0.664 | 0.85  | 1.95E-58 | 17 | PTMA     | Proximal Tubule |
| 2.3123E-37 | -0.5215739 | 0.155 | 0.332 | 4.67E-33 | 17 | HLA-DRA  | Proximal Tubule |
| 1.2976E-44 | -0.3615748 | 0.486 | 0.66  | 2.62E-40 | 17 | ACTB     | Proximal Tubule |

|            |            |       |       |          |    |           |                     |
|------------|------------|-------|-------|----------|----|-----------|---------------------|
| 4.6815E-65 | -0.4066838 | 0.631 | 0.797 | 9.46E-61 | 17 | TMSB10    | Proximal Tubule     |
| 1.5762E-73 | -0.5749983 | 0.332 | 0.588 | 3.19E-69 | 17 | FOS       | Proximal Tubule     |
| 5.4531E-60 | -0.3627211 | 0.95  | 0.998 | 1.1E-55  | 17 | MALAT1    | Proximal Tubule     |
| 5.8121E-77 | -0.4825643 | 0.863 | 0.957 | 1.17E-72 | 17 | B2M       | Proximal Tubule     |
| 4.453E-99  | -0.5606537 | 0.706 | 0.89  | 9E-95    | 17 | TMSB4X    | Proximal Tubule     |
| 0          | 1.18171358 | 1     | 0.017 | 0        | 18 | SPINK1    | Immune/Granulocytes |
| 2.716E-132 | 0.38559532 | 0.458 | 0.164 | 5.5E-128 | 18 | WFDC2     | Immune/Granulocytes |
| 3.726E-115 | 0.42181612 | 0.414 | 0.163 | 7.5E-111 | 18 | MTRNR2L12 | Immune/Granulocytes |
| 1.413E-260 | 0.71158254 | 0.979 | 0.789 | 2.9E-256 | 18 | MT-ND4L   | Immune/Granulocytes |
| 4.7354E-83 | 0.3205557  | 0.394 | 0.166 | 9.57E-79 | 18 | DEFB1     | Immune/Granulocytes |
| 2.259E-216 | 0.59541295 | 0.985 | 0.884 | 4.6E-212 | 18 | MT-ND5    | Immune/Granulocytes |
| 4.9465E-67 | 0.21136135 | 0.242 | 0.085 | 1E-62    | 18 | S100A2    | Immune/Granulocytes |
| 4.557E-217 | 0.56820485 | 0.997 | 0.951 | 9.2E-213 | 18 | MT-ND1    | Immune/Granulocytes |
| 6.137E-73  | 0.27066535 | 0.402 | 0.184 | 1.24E-68 | 18 | CLU       | Immune/Granulocytes |
| 5.738E-47  | 0.30333211 | 0.348 | 0.192 | 1.16E-42 | 18 | MT-ATP8   | Immune/Granulocytes |
| 2.2026E-53 | 0.26696131 | 0.423 | 0.226 | 4.45E-49 | 18 | ATP1B1    | Immune/Granulocytes |
| 6.3767E-35 | 0.25853417 | 0.34  | 0.206 | 1.29E-30 | 18 | HSPB1     | Immune/Granulocytes |
| 3.0516E-35 | 0.24354552 | 0.357 | 0.208 | 6.17E-31 | 18 | FXD2      | Immune/Granulocytes |
| 5.2646E-71 | 0.20891104 | 0.504 | 0.262 | 1.06E-66 | 18 | SPP1      | Immune/Granulocytes |
| 1.172E-109 | 0.3220842  | 1     | 0.989 | 2.4E-105 | 18 | MT-CYB    | Immune/Granulocytes |
| 2.4214E-19 | 0.24263286 | 0.442 | 0.378 | 4.89E-15 | 18 | ATP5I     | Immune/Granulocytes |
| 9.6834E-81 | 0.20570128 | 1     | 1     | 1.96E-76 | 18 | MT-CO2    | Immune/Granulocytes |
| 2.0316E-35 | -0.2135058 | 0.008 | 0.151 | 4.11E-31 | 18 | FCER1G    | Immune/Granulocytes |
| 1.4446E-25 | -0.2200544 | 0.006 | 0.111 | 2.92E-21 | 18 | CCL3      | Immune/Granulocytes |
| 6.6675E-55 | -0.2840776 | 0.011 | 0.22  | 1.35E-50 | 18 | CXCR4     | Immune/Granulocytes |
| 4.7985E-30 | -0.2490787 | 0.008 | 0.131 | 9.7E-26  | 18 | CXCL2     | Immune/Granulocytes |
| 3.6818E-35 | -0.2237634 | 0.011 | 0.155 | 7.44E-31 | 18 | RGS1      | Immune/Granulocytes |
| 4.9642E-37 | -0.2559027 | 0.01  | 0.16  | 1E-32    | 18 | CCL5      | Immune/Granulocytes |
| 1.2846E-28 | -0.2525721 | 0.008 | 0.126 | 2.6E-24  | 18 | C1QA      | Immune/Granulocytes |
| 3.0007E-79 | -0.3927649 | 0.017 | 0.298 | 6.06E-75 | 18 | SRGN      | Immune/Granulocytes |
| 1.7814E-21 | -0.2150775 | 0.012 | 0.106 | 3.6E-17  | 18 | CTGF      | Immune/Granulocytes |
| 5.2183E-42 | -0.2717806 | 0.017 | 0.188 | 1.05E-37 | 18 | TYROBP    | Immune/Granulocytes |
| 5.4062E-35 | -0.2101334 | 0.021 | 0.172 | 1.09E-30 | 18 | HLA-DPB1  | Immune/Granulocytes |
| 5.0593E-31 | -0.3227597 | 0.02  | 0.155 | 1.02E-26 | 18 | LYZ       | Immune/Granulocytes |
| 1.2531E-40 | -0.2255609 | 0.043 | 0.226 | 2.53E-36 | 18 | NFKBIA    | Immune/Granulocytes |
| 4.9785E-40 | -0.2050547 | 0.054 | 0.243 | 1.01E-35 | 18 | SH3BGRL3  | Immune/Granulocytes |
| 1.4299E-35 | -0.2540597 | 0.036 | 0.196 | 2.89E-31 | 18 | AIF1      | Immune/Granulocytes |
| 1.7766E-51 | -0.273682  | 0.047 | 0.267 | 3.59E-47 | 18 | ZFP36     | Immune/Granulocytes |
| 5.7688E-44 | -0.2374733 | 0.057 | 0.259 | 1.17E-39 | 18 | VIM       | Immune/Granulocytes |
| 6.1933E-38 | -0.2017618 | 0.069 | 0.256 | 1.25E-33 | 18 | ZFP36L1   | Immune/Granulocytes |
| 1.2535E-46 | -0.2458678 | 0.064 | 0.278 | 2.53E-42 | 18 | BTG1      | Immune/Granulocytes |
| 5.4047E-35 | -0.2212118 | 0.061 | 0.233 | 1.09E-30 | 18 | S100A4    | Immune/Granulocytes |
| 9.7673E-41 | -0.2317564 | 0.07  | 0.267 | 1.97E-36 | 18 | FOSB      | Immune/Granulocytes |
| 1.0305E-45 | -0.248307  | 0.077 | 0.294 | 2.08E-41 | 18 | CYBA      | Immune/Granulocytes |
| 5.0506E-19 | -0.2440277 | 0.041 | 0.142 | 1.02E-14 | 18 | TIMP1     | Immune/Granulocytes |
| 1.1187E-46 | -0.2613596 | 0.085 | 0.307 | 2.26E-42 | 18 | KLF6      | Immune/Granulocytes |
| 4.5744E-42 | -0.221172  | 0.134 | 0.363 | 9.24E-38 | 18 | HLA-B     | Immune/Granulocytes |
| 4.1836E-37 | -0.2578731 | 0.093 | 0.282 | 8.45E-33 | 18 | EGR1      | Immune/Granulocytes |

|            |            |       |       |          |    |         |                     |
|------------|------------|-------|-------|----------|----|---------|---------------------|
| 1.4695E-84 | -0.4563943 | 0.076 | 0.394 | 2.97E-80 | 18 | DUSP1   | Immune/Granulocytes |
| 1.01E-73   | -0.3347139 | 0.123 | 0.438 | 2.04E-69 | 18 | H3F3B   | Immune/Granulocytes |
| 2.2293E-33 | -0.2027357 | 0.207 | 0.429 | 4.5E-29  | 18 | RPS3    | Immune/Granulocytes |
| 1.4826E-34 | -0.2051218 | 0.262 | 0.506 | 3E-30    | 18 | RPL27A  | Immune/Granulocytes |
| 3.7248E-34 | -0.2145483 | 0.261 | 0.499 | 7.53E-30 | 18 | RPL7    | Immune/Granulocytes |
| 2.6567E-51 | -0.2713364 | 0.2   | 0.474 | 5.37E-47 | 18 | RPS13   | Immune/Granulocytes |
| 2.7757E-27 | -0.2783259 | 0.118 | 0.282 | 5.61E-23 | 18 | LGALS1  | Immune/Granulocytes |
| 5.7744E-30 | -0.202111  | 0.32  | 0.552 | 1.17E-25 | 18 | RPL23A  | Immune/Granulocytes |
| 1.3723E-33 | -0.2118051 | 0.312 | 0.553 | 2.77E-29 | 18 | RPL11   | Immune/Granulocytes |
| 5.8616E-42 | -0.2446121 | 0.244 | 0.499 | 1.18E-37 | 18 | RPS26   | Immune/Granulocytes |
| 9.249E-71  | -0.6607059 | 0.063 | 0.334 | 1.87E-66 | 18 | HLA-DRA | Immune/Granulocytes |
| 1.2296E-41 | -0.2491362 | 0.265 | 0.525 | 2.48E-37 | 18 | RPL35A  | Immune/Granulocytes |
| 1.7432E-48 | -0.2884619 | 0.217 | 0.484 | 3.52E-44 | 18 | RPS2    | Immune/Granulocytes |
| 9.8266E-12 | -0.2402546 | 0.103 | 0.19  | 1.99E-07 | 18 | MT1X    | Immune/Granulocytes |
| 2.1013E-27 | -0.2094383 | 0.396 | 0.614 | 4.25E-23 | 18 | RPS12   | Immune/Granulocytes |
| 2.4651E-34 | -0.2339596 | 0.347 | 0.59  | 4.98E-30 | 18 | RPL26   | Immune/Granulocytes |
| 3.7545E-40 | -0.254158  | 0.338 | 0.599 | 7.59E-36 | 18 | RPL28   | Immune/Granulocytes |
| 1.438E-58  | -0.3225564 | 0.24  | 0.536 | 2.91E-54 | 18 | RPS3A   | Immune/Granulocytes |
| 1.6343E-46 | -0.288733  | 0.291 | 0.561 | 3.3E-42  | 18 | RPL18A  | Immune/Granulocytes |
| 8.3294E-38 | -0.3476389 | 0.158 | 0.362 | 1.68E-33 | 18 | CD74    | Immune/Granulocytes |
| 3.239E-88  | -0.4094483 | 0.218 | 0.572 | 6.55E-84 | 18 | TPT1    | Immune/Granulocytes |
| 0.00052669 | -0.2186536 | 0.293 | 0.359 | 1        | 18 | MT2A    | Immune/Granulocytes |
| 1.6428E-57 | -0.3563441 | 0.319 | 0.606 | 3.32E-53 | 18 | RPS15A  | Immune/Granulocytes |
| 1.2988E-24 | -0.211048  | 0.696 | 0.773 | 2.62E-20 | 18 | RPS27A  | Immune/Granulocytes |
| 5.1543E-22 | -0.2054646 | 0.798 | 0.821 | 1.04E-17 | 18 | RPL13   | Immune/Granulocytes |
| 1.0453E-14 | -0.2307305 | 0.63  | 0.694 | 2.11E-10 | 18 | NEAT1   | Immune/Granulocytes |
| 3.7066E-18 | -0.2250092 | 0.801 | 0.803 | 7.49E-14 | 18 | RPS19   | Immune/Granulocytes |
| 2.5112E-24 | -0.2412447 | 0.742 | 0.786 | 5.07E-20 | 18 | RPL10   | Immune/Granulocytes |
| 1.1314E-27 | -0.3507095 | 0.384 | 0.571 | 2.29E-23 | 18 | FTH1    | Immune/Granulocytes |
| 3.7947E-41 | -0.2658635 | 0.798 | 0.847 | 7.67E-37 | 18 | PTMA    | Immune/Granulocytes |
| 6.5429E-56 | -0.4191405 | 0.448 | 0.661 | 1.32E-51 | 18 | ACTB    | Immune/Granulocytes |
| 2.9748E-40 | -0.2891343 | 0.96  | 0.947 | 6.01E-36 | 18 | RPL34   | Immune/Granulocytes |
| 7.7698E-46 | -0.3024439 | 0.888 | 0.908 | 1.57E-41 | 18 | RPL21   | Immune/Granulocytes |
| 2.3927E-36 | -0.337128  | 0.755 | 0.794 | 4.84E-32 | 18 | TMSB10  | Immune/Granulocytes |
| 6.1904E-53 | -0.3229268 | 1     | 0.997 | 1.25E-48 | 18 | MALAT1  | Immune/Granulocytes |
| 8.7774E-79 | -0.6404777 | 0.337 | 0.588 | 1.77E-74 | 18 | FOS     | Immune/Granulocytes |
| 1.059E-105 | -0.5040378 | 0.792 | 0.873 | 2.1E-101 | 18 | RPL39   | Immune/Granulocytes |
| 1.6662E-20 | -1.5462394 | 0.057 | 0.17  | 3.37E-16 | 18 | IGKC    | Immune/Granulocytes |
| 4.858E-99  | -0.6089473 | 0.886 | 0.886 | 9.82E-95 | 18 | TMSB4X  | Immune/Granulocytes |
| 1.1493E-16 | -0.7360029 | 0.736 | 0.702 | 2.32E-12 | 18 | FTL     | Immune/Granulocytes |
| 1.599E-211 | -0.9169902 | 0.926 | 0.956 | 3.2E-207 | 18 | B2M     | Immune/Granulocytes |
| 0          | 0.66381076 | 0.315 | 0.001 | 0        | 19 | LUM     | Mesangial cells     |
| 0          | 0.74666053 | 0.398 | 0.003 | 0        | 19 | COL1A1  | Mesangial cells     |
| 0          | 0.96472157 | 0.552 | 0.008 | 0        | 19 | COL1A2  | Mesangial cells     |
| 0          | 0.92614474 | 0.486 | 0.008 | 0        | 19 | COL3A1  | Mesangial cells     |
| 0          | 0.43699516 | 0.351 | 0.005 | 0        | 19 | COL6A3  | Mesangial cells     |
| 0          | 0.6257521  | 0.267 | 0.009 | 0        | 19 | TFPI2   | Mesangial cells     |
| 0          | 1.41094721 | 0.581 | 0.058 | 0        | 19 | FN1     | Mesangial cells     |

|            |            |       |       |          |    |          |                 |
|------------|------------|-------|-------|----------|----|----------|-----------------|
| 0          | 0.44758011 | 0.305 | 0.012 | 0        | 19 | CCDC80   | Mesangial cells |
| 0          | 1.9015884  | 0.747 | 0.13  | 0        | 19 | TIMP1    | Mesangial cells |
| 0          | 0.77900437 | 0.513 | 0.044 | 0        | 19 | TAGLN    | Mesangial cells |
| 0          | 0.46189757 | 0.273 | 0.016 | 0        | 19 | SERPINE2 | Mesangial cells |
| 0          | 0.52033289 | 0.413 | 0.031 | 0        | 19 | TPM2     | Mesangial cells |
| 0          | 0.24159093 | 0.216 | 0.008 | 0        | 19 | SULF1    | Mesangial cells |
| 3.564E-279 | 1.33941256 | 0.438 | 0.091 | 7.2E-275 | 19 | MGP      | Mesangial cells |
| 0          | 0.20531471 | 0.211 | 0.007 | 0        | 19 | LTBP1    | Mesangial cells |
| 0          | 0.47324629 | 0.297 | 0.025 | 0        | 19 | DCN      | Mesangial cells |
| 0          | 0.27990721 | 0.261 | 0.013 | 0        | 19 | COL6A2   | Mesangial cells |
| 0          | 0.30754448 | 0.208 | 0.012 | 0        | 19 | POSTN    | Mesangial cells |
| 0          | 0.21570955 | 0.186 | 0.009 | 0        | 19 | SERPINE1 | Mesangial cells |
| 0          | 1.46483304 | 0.771 | 0.271 | 0        | 19 | LGALS1   | Mesangial cells |
| 0          | 0.41508085 | 0.313 | 0.032 | 0        | 19 | IGFBP6   | Mesangial cells |
| 0          | 0.25835076 | 0.271 | 0.019 | 0        | 19 | BGN      | Mesangial cells |
| 0          | 0.27751591 | 0.299 | 0.023 | 0        | 19 | FSTL1    | Mesangial cells |
| 0          | 0.60009173 | 0.595 | 0.099 | 0        | 19 | CALD1    | Mesangial cells |
| 7.016E-253 | 0.24249954 | 0.181 | 0.017 | 1.4E-248 | 19 | ACTA2    | Mesangial cells |
| 1.701E-231 | 1.15604933 | 0.781 | 0.35  | 3.4E-227 | 19 | MT2A     | Mesangial cells |
| 4.538E-226 | 0.50134838 | 0.447 | 0.105 | 9.2E-222 | 19 | SPARC    | Mesangial cells |
| 1.247E-270 | 0.34159957 | 0.38  | 0.065 | 2.5E-266 | 19 | MYL9     | Mesangial cells |
| 4.583E-215 | 0.26245571 | 0.283 | 0.046 | 9.3E-211 | 19 | NNMT     | Mesangial cells |
| 4.74E-189  | 0.59579126 | 0.643 | 0.249 | 9.6E-185 | 19 | VIM      | Mesangial cells |
| 8.955E-214 | 0.2358814  | 0.269 | 0.042 | 1.8E-209 | 19 | VCAN     | Mesangial cells |
| 5.072E-148 | 0.38452608 | 0.38  | 0.099 | 1E-143   | 19 | CTGF     | Mesangial cells |
| 3.907E-162 | 0.28999974 | 0.296 | 0.062 | 7.9E-158 | 19 | CYR61    | Mesangial cells |
| 2.592E-101 | 0.81593664 | 0.707 | 0.451 | 5.24E-97 | 19 | S100A6   | Mesangial cells |
| 4.926E-175 | 0.28968424 | 0.375 | 0.088 | 1E-170   | 19 | TPM1     | Mesangial cells |
| 1.117E-181 | 0.25724092 | 0.337 | 0.072 | 2.3E-177 | 19 | TPM4     | Mesangial cells |
| 1.25E-125  | 0.3666064  | 0.376 | 0.116 | 2.5E-121 | 19 | ANXA2    | Mesangial cells |
| 4.506E-87  | 0.33472909 | 0.25  | 0.071 | 9.11E-83 | 19 | CCL2     | Mesangial cells |
| 5.85E-110  | 0.47750678 | 0.529 | 0.241 | 1.2E-105 | 19 | GAPDH    | Mesangial cells |
| 9.196E-139 | 0.22661514 | 0.311 | 0.075 | 1.9E-134 | 19 | SELM     | Mesangial cells |
| 2.0613E-94 | 0.26986728 | 0.321 | 0.103 | 4.17E-90 | 19 | EMP3     | Mesangial cells |
| 2.4265E-85 | 0.37351867 | 0.528 | 0.24  | 4.9E-81  | 19 | IGFBP7   | Mesangial cells |
| 2.182E-81  | 0.25943537 | 0.285 | 0.09  | 4.41E-77 | 19 | TIMP3    | Mesangial cells |
| 2.4014E-77 | 0.26707621 | 0.287 | 0.095 | 4.85E-73 | 19 | THBS1    | Mesangial cells |
| 3.7179E-46 | 0.32211348 | 0.259 | 0.105 | 7.51E-42 | 19 | IGFBP5   | Mesangial cells |
| 4.0149E-41 | 0.4162444  | 0.41  | 0.219 | 8.11E-37 | 19 | ADIRF    | Mesangial cells |
| 3.381E-106 | 0.26452891 | 0.396 | 0.135 | 6.8E-102 | 19 | ITGB1    | Mesangial cells |
| 3.9484E-88 | 0.37994736 | 0.572 | 0.29  | 7.98E-84 | 19 | ACTG1    | Mesangial cells |
| 2.579E-85  | 0.31433395 | 0.522 | 0.233 | 5.21E-81 | 19 | IFITM3   | Mesangial cells |
| 4.8485E-71 | 0.24371116 | 0.275 | 0.096 | 9.8E-67  | 19 | TUBA1B   | Mesangial cells |
| 4.0512E-84 | 0.32715195 | 0.509 | 0.239 | 8.19E-80 | 19 | SEC61G   | Mesangial cells |
| 6.668E-85  | 0.29565136 | 0.477 | 0.206 | 1.35E-80 | 19 | CD63     | Mesangial cells |
| 5.1538E-65 | 0.28373683 | 0.405 | 0.184 | 1.04E-60 | 19 | S100A10  | Mesangial cells |
| 9.0571E-64 | 0.27833674 | 0.477 | 0.234 | 1.83E-59 | 19 | S100A11  | Mesangial cells |
| 1.9323E-53 | 0.24989382 | 0.46  | 0.231 | 3.9E-49  | 19 | DSTN     | Mesangial cells |

|            |            |       |       |          |    |           |                 |
|------------|------------|-------|-------|----------|----|-----------|-----------------|
| 8.5937E-52 | 0.3759056  | 0.81  | 0.654 | 1.74E-47 | 19 | ACTB      | Mesangial cells |
| 7.9884E-53 | 0.21522377 | 0.376 | 0.176 | 1.61E-48 | 19 | TXN       | Mesangial cells |
| 2.114E-50  | 0.21470989 | 0.423 | 0.205 | 4.27E-46 | 19 | HSPB1     | Mesangial cells |
| 1.95E-42   | 0.24111488 | 0.457 | 0.257 | 3.94E-38 | 19 | POLR2L    | Mesangial cells |
| 6.4419E-46 | 0.23878858 | 0.491 | 0.277 | 1.3E-41  | 19 | RPS27L    | Mesangial cells |
| 7.2865E-42 | 0.23079948 | 0.431 | 0.236 | 1.47E-37 | 19 | SH3BGRL3  | Mesangial cells |
| 1.4385E-41 | 0.23993247 | 0.509 | 0.307 | 2.91E-37 | 19 | MYL6      | Mesangial cells |
| 2.6333E-24 | 0.28907179 | 0.614 | 0.476 | 5.32E-20 | 19 | RPS2      | Mesangial cells |
| 3.736E-33  | 0.33725328 | 0.868 | 0.792 | 7.55E-29 | 19 | TMSB10    | Mesangial cells |
| 8.6799E-34 | 0.33808523 | 0.95  | 0.885 | 1.75E-29 | 19 | TMSB4X    | Mesangial cells |
| 1.6598E-33 | 0.25121657 | 0.716 | 0.553 | 3.35E-29 | 19 | RPL37A    | Mesangial cells |
| 4.6706E-31 | 0.2169249  | 0.595 | 0.418 | 9.44E-27 | 19 | SERF2     | Mesangial cells |
| 4.0764E-28 | 0.23286395 | 0.875 | 0.802 | 8.24E-24 | 19 | RPLP1     | Mesangial cells |
| 9.5088E-26 | -0.2166505 | 0.069 | 0.219 | 1.92E-21 | 19 | CXCR4     | Mesangial cells |
| 1.8081E-18 | -0.2115044 | 0.089 | 0.213 | 3.65E-14 | 19 | FXD2      | Mesangial cells |
| 9.1856E-10 | -0.210938  | 0.078 | 0.153 | 1.86E-05 | 19 | LYZ       | Mesangial cells |
| 4.9231E-17 | -0.2505642 | 0.11  | 0.232 | 9.95E-13 | 19 | ATP1B1    | Mesangial cells |
| 3.0728E-26 | -0.2403685 | 0.205 | 0.375 | 6.21E-22 | 19 | PABPC1    | Mesangial cells |
| 9.0683E-14 | -0.2590782 | 0.249 | 0.36  | 1.83E-09 | 19 | CD74      | Mesangial cells |
| 5.2709E-24 | -0.20061   | 0.794 | 0.888 | 1.07E-19 | 19 | MT-ND5    | Mesangial cells |
| 1.7757E-12 | -0.2388146 | 0.325 | 0.418 | 3.59E-08 | 19 | SAT1      | Mesangial cells |
| 3.1571E-30 | -0.2032158 | 0.988 | 0.998 | 6.38E-26 | 19 | MT-ND3    | Mesangial cells |
| 9.2983E-14 | -0.3485183 | 0.157 | 0.268 | 1.88E-09 | 19 | SPP1      | Mesangial cells |
| 7.5127E-16 | -0.415069  | 0.217 | 0.331 | 1.52E-11 | 19 | HLA-DRA   | Mesangial cells |
| 7.3765E-09 | -0.5337965 | 0.141 | 0.218 | 0.000149 | 19 | MT1G      | Mesangial cells |
| 0.00210382 | -0.3774054 | 0.697 | 0.703 | 1        | 19 | FTL       | Mesangial cells |
| 0.00079938 | -1.3332275 | 0.127 | 0.168 | 1        | 19 | IGKC      | Mesangial cells |
| 0          | 1.07354482 | 0.999 | 0.022 | 0        | 20 | SLC5A12   | Proximal Tubule |
| 8.588E-253 | 0.76419905 | 0.994 | 0.79  | 1.7E-248 | 20 | MT-ND4L   | Proximal Tubule |
| 8.3735E-74 | 0.37527856 | 0.382 | 0.165 | 1.69E-69 | 20 | MTRNR2L12 | Proximal Tubule |
| 3.4611E-83 | 0.34404317 | 0.418 | 0.166 | 6.99E-79 | 20 | WFDC2     | Proximal Tubule |
| 2.9869E-60 | 0.36265106 | 0.386 | 0.191 | 6.04E-56 | 20 | MT-ATP8   | Proximal Tubule |
| 1.31E-188  | 0.59446038 | 0.991 | 0.885 | 2.6E-184 | 20 | MT-ND5    | Proximal Tubule |
| 5.402E-215 | 0.6135165  | 0.998 | 0.951 | 1.1E-210 | 20 | MT-ND1    | Proximal Tubule |
| 2.0644E-49 | 0.24562511 | 0.38  | 0.185 | 4.17E-45 | 20 | CLU       | Proximal Tubule |
| 6.3861E-35 | 0.22600099 | 0.398 | 0.227 | 1.29E-30 | 20 | ATP1B1    | Proximal Tubule |
| 3.685E-114 | 0.37190346 | 1     | 0.989 | 7.4E-110 | 20 | MT-CYB    | Proximal Tubule |
| 1.7288E-19 | 0.21865182 | 0.312 | 0.207 | 3.49E-15 | 20 | HSPB1     | Proximal Tubule |
| 2.0489E-11 | 0.2068937  | 0.42  | 0.378 | 4.14E-07 | 20 | ATP5I     | Proximal Tubule |
| 1.7755E-76 | 0.22428984 | 1     | 1     | 3.59E-72 | 20 | MT-CO2    | Proximal Tubule |
| 1.3713E-65 | 0.21985581 | 1     | 1     | 2.77E-61 | 20 | MT-ND4    | Proximal Tubule |
| 1.1464E-52 | 0.20166362 | 1     | 0.996 | 2.32E-48 | 20 | MT-ND2    | Proximal Tubule |
| 8.7221E-23 | -0.2261322 | 0.002 | 0.111 | 1.76E-18 | 20 | CCL3      | Proximal Tubule |
| 3.504E-30  | -0.2139816 | 0.006 | 0.15  | 7.08E-26 | 20 | FCER1G    | Proximal Tubule |
| 1.8711E-28 | -0.2217019 | 0.014 | 0.155 | 3.78E-24 | 20 | RGS1      | Proximal Tubule |
| 1.2622E-42 | -0.2692959 | 0.017 | 0.219 | 2.55E-38 | 20 | CXCR4     | Proximal Tubule |
| 1.8165E-65 | -0.3878109 | 0.017 | 0.297 | 3.67E-61 | 20 | SRGN      | Proximal Tubule |
| 3.0788E-22 | -0.2418853 | 0.012 | 0.126 | 6.22E-18 | 20 | C1QA      | Proximal Tubule |

|            |            |       |       |          |    |          |                 |
|------------|------------|-------|-------|----------|----|----------|-----------------|
| 2.7441E-29 | -0.3365175 | 0.011 | 0.154 | 5.55E-25 | 20 | LYZ      | Proximal Tubule |
| 1.9241E-28 | -0.2421723 | 0.016 | 0.159 | 3.89E-24 | 20 | CCL5     | Proximal Tubule |
| 1.4065E-29 | -0.212179  | 0.02  | 0.171 | 2.84E-25 | 20 | HLA-DPB1 | Proximal Tubule |
| 4.1674E-23 | -0.242073  | 0.014 | 0.131 | 8.42E-19 | 20 | CXCL2    | Proximal Tubule |
| 6.5137E-33 | -0.2608681 | 0.022 | 0.187 | 1.32E-28 | 20 | TYROBP   | Proximal Tubule |
| 2.4854E-32 | -0.2644339 | 0.028 | 0.195 | 5.02E-28 | 20 | AIF1     | Proximal Tubule |
| 1.2191E-36 | -0.2374028 | 0.036 | 0.225 | 2.46E-32 | 20 | NFKBIA   | Proximal Tubule |
| 4.3743E-36 | -0.2130814 | 0.055 | 0.256 | 8.84E-32 | 20 | ZFP36L1  | Proximal Tubule |
| 4.2041E-43 | -0.2739703 | 0.047 | 0.266 | 8.5E-39  | 20 | ZFP36    | Proximal Tubule |
| 3.041E-40  | -0.2158562 | 0.073 | 0.298 | 6.15E-36 | 20 | DDX5     | Proximal Tubule |
| 1.7798E-34 | -0.2225048 | 0.062 | 0.258 | 3.6E-30  | 20 | VIM      | Proximal Tubule |
| 1.0676E-29 | -0.219181  | 0.058 | 0.233 | 2.16E-25 | 20 | S100A4   | Proximal Tubule |
| 1.839E-38  | -0.2193858 | 0.075 | 0.295 | 3.72E-34 | 20 | PFN1     | Proximal Tubule |
| 1.5624E-36 | -0.2414948 | 0.072 | 0.277 | 3.16E-32 | 20 | BTG1     | Proximal Tubule |
| 1.1109E-16 | -0.2460803 | 0.038 | 0.142 | 2.24E-12 | 20 | TIMP1    | Proximal Tubule |
| 6.2426E-35 | -0.2302246 | 0.084 | 0.293 | 1.26E-30 | 20 | CYBA     | Proximal Tubule |
| 1.9911E-39 | -0.2512297 | 0.081 | 0.306 | 4.02E-35 | 20 | KLF6     | Proximal Tubule |
| 2.7474E-40 | -0.2254491 | 0.129 | 0.384 | 5.55E-36 | 20 | H3F3A    | Proximal Tubule |
| 8.1433E-43 | -0.2489839 | 0.111 | 0.363 | 1.65E-38 | 20 | HLA-B    | Proximal Tubule |
| 3.2212E-27 | -0.2389552 | 0.102 | 0.282 | 6.51E-23 | 20 | EGR1     | Proximal Tubule |
| 3.9635E-45 | -0.2492722 | 0.16  | 0.444 | 8.01E-41 | 20 | RPL9     | Proximal Tubule |
| 6.0621E-65 | -0.4278557 | 0.085 | 0.393 | 1.23E-60 | 20 | DUSP1    | Proximal Tubule |
| 3.2283E-41 | -0.2518097 | 0.163 | 0.429 | 6.52E-37 | 20 | RPS3     | Proximal Tubule |
| 6.6554E-55 | -0.3172752 | 0.137 | 0.437 | 1.34E-50 | 20 | H3F3B    | Proximal Tubule |
| 8.8752E-32 | -0.2216088 | 0.208 | 0.453 | 1.79E-27 | 20 | RPS4X    | Proximal Tubule |
| 7.618E-35  | -0.2231909 | 0.234 | 0.506 | 1.54E-30 | 20 | RPL27A   | Proximal Tubule |
| 1.0175E-26 | -0.2193388 | 0.201 | 0.416 | 2.06E-22 | 20 | ITM2B    | Proximal Tubule |
| 2.175E-48  | -0.2856351 | 0.176 | 0.474 | 4.4E-44  | 20 | RPS13    | Proximal Tubule |
| 2.2534E-39 | -0.249209  | 0.221 | 0.499 | 4.55E-35 | 20 | RPL7     | Proximal Tubule |
| 2.9457E-31 | -0.2229611 | 0.29  | 0.552 | 5.95E-27 | 20 | RPL11    | Proximal Tubule |
| 1.0067E-32 | -0.2342211 | 0.264 | 0.524 | 2.03E-28 | 20 | RPL35A   | Proximal Tubule |
| 1.0166E-19 | -0.2580155 | 0.129 | 0.281 | 2.05E-15 | 20 | LGALS1   | Proximal Tubule |
| 1.3599E-28 | -0.2177271 | 0.305 | 0.552 | 2.75E-24 | 20 | RPL23A   | Proximal Tubule |
| 7.1533E-49 | -0.302335  | 0.2   | 0.498 | 1.45E-44 | 20 | RPS26    | Proximal Tubule |
| 2.4446E-43 | -0.2978532 | 0.202 | 0.483 | 4.94E-39 | 20 | RPS2     | Proximal Tubule |
| 2.2207E-10 | -0.237209  | 0.1   | 0.19  | 4.49E-06 | 20 | MT1X     | Proximal Tubule |
| 3.7937E-59 | -0.6660234 | 0.063 | 0.333 | 7.67E-55 | 20 | HLA-DRA  | Proximal Tubule |
| 4.5992E-29 | -0.2266405 | 0.34  | 0.596 | 9.29E-25 | 20 | RPLP2    | Proximal Tubule |
| 6.614E-72  | -0.3987276 | 0.175 | 0.536 | 1.34E-67 | 20 | RPS3A    | Proximal Tubule |
| 7.099E-32  | -0.2453283 | 0.346 | 0.614 | 1.43E-27 | 20 | RPS12    | Proximal Tubule |
| 4.9576E-39 | -0.282241  | 0.281 | 0.561 | 1E-34    | 20 | RPL18A   | Proximal Tubule |
| 1.5094E-36 | -0.2632261 | 0.322 | 0.598 | 3.05E-32 | 20 | RPL28    | Proximal Tubule |
| 2.5626E-67 | -0.3845198 | 0.217 | 0.571 | 5.18E-63 | 20 | TPT1     | Proximal Tubule |
| 1.9983E-33 | -0.2630133 | 0.328 | 0.589 | 4.04E-29 | 20 | RPL26    | Proximal Tubule |
| 3.1009E-33 | -0.3533494 | 0.152 | 0.362 | 6.27E-29 | 20 | CD74     | Proximal Tubule |
| 2.8359E-52 | -0.3569899 | 0.293 | 0.605 | 5.73E-48 | 20 | RPS15A   | Proximal Tubule |
| 7.1367E-20 | -0.2238793 | 0.567 | 0.695 | 1.44E-15 | 20 | RPS8     | Proximal Tubule |
| 9.6333E-10 | -0.2070474 | 0.64  | 0.694 | 1.95E-05 | 20 | NEAT1    | Proximal Tubule |

|            |            |       |       |          |    |        |                 |
|------------|------------|-------|-------|----------|----|--------|-----------------|
| 3.0063E-25 | -0.2308576 | 0.677 | 0.773 | 6.08E-21 | 20 | RPS27A | Proximal Tubule |
| 6.1301E-20 | -0.2188376 | 0.806 | 0.821 | 1.24E-15 | 20 | RPL13  | Proximal Tubule |
| 1.2619E-30 | -0.3848501 | 0.349 | 0.571 | 2.55E-26 | 20 | FTH1   | Proximal Tubule |
| 8.3451E-12 | -0.2296697 | 0.818 | 0.793 | 1.69E-07 | 20 | TMSB10 | Proximal Tubule |
| 2.0833E-22 | -0.2553386 | 0.752 | 0.785 | 4.21E-18 | 20 | RPL10  | Proximal Tubule |
| 5.1218E-35 | -0.2685809 | 0.811 | 0.847 | 1.04E-30 | 20 | PTMA   | Proximal Tubule |
| 7.992E-45  | -0.4183285 | 0.465 | 0.66  | 1.62E-40 | 20 | ACTB   | Proximal Tubule |
| 6.969E-49  | -0.3403683 | 0.908 | 0.907 | 1.41E-44 | 20 | RPL21  | Proximal Tubule |
| 2.6997E-50 | -0.3466662 | 1     | 0.997 | 5.46E-46 | 20 | MALAT1 | Proximal Tubule |
| 5.749E-53  | -0.3600029 | 0.943 | 0.947 | 1.16E-48 | 20 | RPL34  | Proximal Tubule |
| 9.8438E-63 | -0.6263963 | 0.345 | 0.587 | 1.99E-58 | 20 | FOS    | Proximal Tubule |
| 7.4123E-90 | -0.5071376 | 0.806 | 0.872 | 1.5E-85  | 20 | RPL39  | Proximal Tubule |
| 2.2855E-18 | -1.5508469 | 0.053 | 0.169 | 4.62E-14 | 20 | IGKC   | Proximal Tubule |
| 1.6053E-89 | -0.6325922 | 0.906 | 0.886 | 3.24E-85 | 20 | TMSB4X | Proximal Tubule |
| 1.3452E-13 | -0.7231524 | 0.731 | 0.702 | 2.72E-09 | 20 | FTL    | Proximal Tubule |
| 1.007E-193 | -0.9771478 | 0.928 | 0.955 | 2E-189   | 20 | B2M    | Proximal Tubule |
| 0          | 0.3575134  | 0.329 | 0.008 | 0        | 21 | MS4A1  | B cells         |
| 3.235E-157 | 0.24973272 | 0.267 | 0.048 | 6.5E-153 | 21 | LTB    | B cells         |
| 1.579E-110 | 0.40713484 | 0.401 | 0.128 | 3.2E-106 | 21 | CD69   | B cells         |
| 5.625E-117 | 0.39192912 | 0.462 | 0.154 | 1.1E-112 | 21 | CD52   | B cells         |
| 3.7955E-91 | 0.35045762 | 0.517 | 0.212 | 7.67E-87 | 21 | CXCR4  | B cells         |
| 6.07E-227  | 0.71472519 | 0.99  | 0.946 | 1.2E-222 | 21 | RPS27  | B cells         |
| 6.4081E-96 | 0.4893366  | 0.802 | 0.544 | 1.29E-91 | 21 | RPL23A | B cells         |
| 3.322E-115 | 0.57011015 | 0.873 | 0.69  | 6.7E-111 | 21 | RPS8   | B cells         |
| 8.6697E-69 | 0.34961061 | 0.543 | 0.27  | 1.75E-64 | 21 | BTG1   | B cells         |
| 3.884E-90  | 0.4856132  | 0.797 | 0.553 | 7.85E-86 | 21 | RPL18A | B cells         |
| 1.327E-96  | 0.48048363 | 0.838 | 0.597 | 2.68E-92 | 21 | RPS15A | B cells         |
| 4.0954E-91 | 0.47463716 | 0.819 | 0.588 | 8.28E-87 | 21 | RPLP2  | B cells         |
| 9.341E-169 | 0.60268433 | 0.981 | 0.906 | 1.9E-164 | 21 | RPL21  | B cells         |
| 4.024E-127 | 0.53449872 | 0.94  | 0.792 | 8.1E-123 | 21 | RPL13A | B cells         |
| 3.676E-132 | 0.56557912 | 0.95  | 0.87  | 7.4E-128 | 21 | RPL39  | B cells         |
| 1.87E-112  | 0.49483415 | 0.926 | 0.762 | 3.8E-108 | 21 | RPL32  | B cells         |
| 5.4279E-70 | 0.40522302 | 0.779 | 0.545 | 1.1E-65  | 21 | RPL11  | B cells         |
| 1.3496E-58 | 0.35184417 | 0.642 | 0.391 | 2.73E-54 | 21 | RPS5   | B cells         |
| 4.0846E-72 | 0.42655074 | 0.808 | 0.607 | 8.25E-68 | 21 | RPS12  | B cells         |
| 2.479E-124 | 0.49543433 | 0.964 | 0.848 | 5E-120   | 21 | RPS29  | B cells         |
| 1.0965E-67 | 0.3908298  | 0.759 | 0.527 | 2.22E-63 | 21 | RPS3A  | B cells         |
| 7.6949E-69 | 0.40073083 | 0.779 | 0.56  | 1.55E-64 | 21 | RPS25  | B cells         |
| 3.378E-109 | 0.47825911 | 0.947 | 0.819 | 6.8E-105 | 21 | RPL13  | B cells         |
| 3.309E-97  | 0.46467346 | 0.942 | 0.811 | 6.69E-93 | 21 | RPS18  | B cells         |
| 2.1204E-63 | 0.35602737 | 0.763 | 0.516 | 4.28E-59 | 21 | RPL35A | B cells         |
| 6.8877E-85 | 0.4290801  | 0.908 | 0.769 | 1.39E-80 | 21 | RPS27A | B cells         |
| 9.5282E-56 | 0.34843536 | 0.72  | 0.499 | 1.93E-51 | 21 | RPL27A | B cells         |
| 2.9979E-59 | 0.35252154 | 0.783 | 0.563 | 6.06E-55 | 21 | RPL12  | B cells         |
| 1.4397E-60 | 0.35446519 | 0.805 | 0.592 | 2.91E-56 | 21 | RPS6   | B cells         |
| 3.7185E-76 | 0.40789697 | 0.914 | 0.783 | 7.51E-72 | 21 | RPL10  | B cells         |
| 1.216E-107 | 0.45500211 | 0.987 | 0.947 | 2.5E-103 | 21 | RPL34  | B cells         |
| 3.358E-50  | 0.29752665 | 0.663 | 0.421 | 6.79E-46 | 21 | RPS3   | B cells         |

|            |            |       |       |          |    |         |         |
|------------|------------|-------|-------|----------|----|---------|---------|
| 2.8479E-46 | 0.31067323 | 0.699 | 0.475 | 5.76E-42 | 21 | RPS2    | B cells |
| 1.3592E-51 | 0.32981247 | 0.792 | 0.591 | 2.75E-47 | 21 | RPL28   | B cells |
| 3.5447E-40 | 0.28935947 | 0.649 | 0.447 | 7.16E-36 | 21 | RPS4X   | B cells |
| 3.7786E-66 | 0.36046572 | 0.929 | 0.802 | 7.64E-62 | 21 | RPS19   | B cells |
| 1.8315E-36 | 0.28267988 | 0.607 | 0.413 | 3.7E-32  | 21 | RPS20   | B cells |
| 1.6265E-44 | 0.3153506  | 0.765 | 0.583 | 3.29E-40 | 21 | RPL26   | B cells |
| 9.1865E-37 | 0.25117827 | 0.513 | 0.317 | 1.86E-32 | 21 | RPL30   | B cells |
| 4.2074E-58 | 0.35622527 | 0.911 | 0.801 | 8.5E-54  | 21 | RPLP1   | B cells |
| 1.6596E-63 | 0.35290212 | 0.897 | 0.783 | 3.35E-59 | 21 | RPS15   | B cells |
| 5.1546E-37 | 0.25111479 | 0.589 | 0.369 | 1.04E-32 | 21 | PABPC1  | B cells |
| 2.6669E-36 | 0.24444383 | 0.542 | 0.334 | 5.39E-32 | 21 | RPL10A  | B cells |
| 2.1861E-39 | 0.29990602 | 0.741 | 0.574 | 4.42E-35 | 21 | RPS23   | B cells |
| 5.9657E-34 | 0.27151153 | 0.653 | 0.466 | 1.21E-29 | 21 | RPS13   | B cells |
| 6.6527E-43 | 0.21393656 | 0.616 | 0.355 | 1.34E-38 | 21 | CD74    | B cells |
| 6.4782E-41 | 0.29573989 | 0.788 | 0.628 | 1.31E-36 | 21 | RPL35   | B cells |
| 2.5775E-40 | 0.30090631 | 0.776 | 0.636 | 5.21E-36 | 21 | RPL36   | B cells |
| 1.4926E-32 | 0.26637669 | 0.634 | 0.462 | 3.02E-28 | 21 | RPS17   | B cells |
| 8.5944E-33 | 0.26467241 | 0.63  | 0.457 | 1.74E-28 | 21 | RPL19   | B cells |
| 3.6051E-31 | 0.24463595 | 0.616 | 0.43  | 7.29E-27 | 21 | RPL31   | B cells |
| 1.2189E-30 | 0.24936437 | 0.613 | 0.437 | 2.46E-26 | 21 | RPL9    | B cells |
| 2.7186E-41 | 0.29558958 | 0.836 | 0.71  | 5.49E-37 | 21 | RPS14   | B cells |
| 1.7919E-39 | 0.28314889 | 0.815 | 0.667 | 3.62E-35 | 21 | RPS28   | B cells |
| 6.4969E-29 | 0.24178962 | 0.599 | 0.427 | 1.31E-24 | 21 | FAU     | B cells |
| 1.4235E-29 | 0.208006   | 0.485 | 0.302 | 2.88E-25 | 21 | RPL14   | B cells |
| 5.3794E-26 | 0.24216124 | 0.628 | 0.468 | 1.09E-21 | 21 | RPL3    | B cells |
| 7.6735E-25 | 0.21113924 | 0.515 | 0.349 | 1.55E-20 | 21 | RPL27   | B cells |
| 4.0006E-25 | 0.22804997 | 0.645 | 0.491 | 8.08E-21 | 21 | RPS26   | B cells |
| 8.0408E-43 | 0.26715448 | 0.947 | 0.872 | 1.62E-38 | 21 | RPL41   | B cells |
| 3.1086E-22 | 0.200423   | 0.511 | 0.355 | 6.28E-18 | 21 | RPL18   | B cells |
| 5.2264E-22 | 0.20676624 | 0.539 | 0.39  | 1.06E-17 | 21 | RPL37   | B cells |
| 7.0401E-19 | 0.2049253  | 0.517 | 0.386 | 1.42E-14 | 21 | RPS16   | B cells |
| 3.6449E-49 | 0.23337546 | 1     | 0.997 | 7.37E-45 | 21 | MALAT1  | B cells |
| 1.8026E-18 | -0.2351622 | 0.021 | 0.131 | 3.64E-14 | 21 | CXCL2   | B cells |
| 7.2818E-25 | -0.2491792 | 0.038 | 0.187 | 1.47E-20 | 21 | TYROBP  | B cells |
| 3.274E-12  | -0.2046488 | 0.026 | 0.105 | 6.62E-08 | 21 | CTGF    | B cells |
| 5.8916E-29 | -0.2208414 | 0.063 | 0.241 | 1.19E-24 | 21 | S100A11 | B cells |
| 3.7655E-25 | -0.2277943 | 0.054 | 0.213 | 7.61E-21 | 21 | PSAP    | B cells |
| 2.6031E-23 | -0.2101856 | 0.06  | 0.21  | 5.26E-19 | 21 | NPC2    | B cells |
| 8.1328E-28 | -0.2316462 | 0.063 | 0.238 | 1.64E-23 | 21 | DSTN    | B cells |
| 1.6324E-28 | -0.2337541 | 0.063 | 0.24  | 3.3E-24  | 21 | IFITM3  | B cells |
| 7.7109E-23 | -0.3029295 | 0.035 | 0.172 | 1.56E-18 | 21 | WFDC2   | B cells |
| 8.8657E-17 | -0.2682929 | 0.033 | 0.142 | 1.79E-12 | 21 | TIMP1   | B cells |
| 3.1803E-22 | -0.2058924 | 0.064 | 0.211 | 6.43E-18 | 21 | HSPB1   | B cells |
| 1.9778E-19 | -0.3116618 | 0.033 | 0.154 | 4E-15    | 21 | LYZ     | B cells |
| 1.2701E-12 | -0.2168873 | 0.039 | 0.125 | 2.57E-08 | 21 | C1QA    | B cells |
| 1.4384E-22 | -0.2360742 | 0.06  | 0.206 | 2.91E-18 | 21 | CTSD    | B cells |
| 6.5664E-12 | -0.2591886 | 0.029 | 0.108 | 1.33E-07 | 21 | IGFBP5  | B cells |
| 2.2408E-31 | -0.2930073 | 0.06  | 0.248 | 4.53E-27 | 21 | IGFBP7  | B cells |

|            |            |       |       |          |    |         |                        |
|------------|------------|-------|-------|----------|----|---------|------------------------|
| 4.4573E-21 | -0.2418511 | 0.057 | 0.194 | 9.01E-17 | 21 | AIF1    | B cells                |
| 3.9675E-20 | -0.2887763 | 0.045 | 0.172 | 8.02E-16 | 21 | DEFB1   | B cells                |
| 2.2458E-23 | -0.3169293 | 0.046 | 0.19  | 4.54E-19 | 21 | CLU     | B cells                |
| 4.4523E-30 | -0.3569302 | 0.054 | 0.233 | 9E-26    | 21 | ATP1B1  | B cells                |
| 5.9289E-32 | -0.283409  | 0.082 | 0.28  | 1.2E-27  | 21 | CST3    | B cells                |
| 2.2384E-29 | -0.3767174 | 0.05  | 0.224 | 4.52E-25 | 21 | ADIRF   | B cells                |
| 2.995E-20  | -0.2521084 | 0.075 | 0.213 | 6.05E-16 | 21 | FXD2    | B cells                |
| 7.1522E-24 | -0.2032253 | 0.139 | 0.313 | 1.45E-19 | 21 | MYL6    | B cells                |
| 4.7609E-06 | -0.2157496 | 0.097 | 0.154 | 0.096208 | 21 | APOE    | B cells                |
| 4.9636E-41 | -0.3501528 | 0.178 | 0.416 | 1E-36    | 21 | ITM2B   | B cells                |
| 2.8961E-08 | -0.2519882 | 0.113 | 0.19  | 0.000585 | 21 | MT1X    | B cells                |
| 1.441E-18  | -0.3106217 | 0.142 | 0.281 | 2.91E-14 | 21 | LGALS1  | B cells                |
| 3.7872E-31 | -0.5540563 | 0.084 | 0.269 | 7.65E-27 | 21 | SPP1    | B cells                |
| 6.4525E-17 | -0.2673237 | 0.28  | 0.418 | 1.3E-12  | 21 | SAT1    | B cells                |
| 3.8838E-59 | -0.5356152 | 0.166 | 0.459 | 7.85E-55 | 21 | S100A6  | B cells                |
| 1.9561E-06 | -0.2078303 | 0.779 | 0.793 | 0.03953  | 21 | MT-ND4L | B cells                |
| 9.7713E-27 | -0.2052496 | 1     | 1     | 1.97E-22 | 21 | MT-CO1  | B cells                |
| 3.2768E-29 | -0.4842557 | 0.169 | 0.36  | 6.62E-25 | 21 | MT2A    | B cells                |
| 1.2993E-13 | -0.2473618 | 0.745 | 0.794 | 2.63E-09 | 21 | TMSB10  | B cells                |
| 7.9916E-18 | -0.2561293 | 0.935 | 0.952 | 1.61E-13 | 21 | MT-ND1  | B cells                |
| 1.1327E-09 | -0.2907573 | 0.522 | 0.584 | 2.29E-05 | 21 | FOS     | B cells                |
| 1.8971E-49 | -0.4039052 | 0.461 | 0.696 | 3.83E-45 | 21 | NEAT1   | B cells                |
| 1.0813E-20 | -0.3883894 | 0.451 | 0.569 | 2.19E-16 | 21 | FTH1    | B cells                |
| 9.6695E-07 | -0.5133556 | 0.15  | 0.218 | 0.01954  | 21 | MT1G    | B cells                |
| 1.117E-08  | -0.5896785 | 0.666 | 0.703 | 0.000226 | 21 | FTL     | B cells                |
| 6.1598E-31 | -0.7928509 | 0.166 | 0.06  | 1.24E-26 | 21 | IGLC3   | B cells                |
| 6.1492E-32 | -0.9507336 | 0.203 | 0.08  | 1.24E-27 | 21 | IGLC2   | B cells                |
| 4.0181E-81 | -0.9887555 | 0.435 | 0.164 | 8.12E-77 | 21 | IGKC    | B cells                |
| 0          | 0.5051742  | 0.342 | 0.003 | 0        | 22 | SLC12A3 | Distal Convolut Tubule |
| 0          | 1.40391085 | 0.886 | 0.032 | 0        | 22 | TMEM52B | Distal Convolut Tubule |
| 0          | 1.04764491 | 0.727 | 0.163 | 0        | 22 | DEFB1   | Distal Convolut Tubule |
| 4.66E-297  | 0.53089898 | 0.438 | 0.069 | 9.4E-293 | 22 | WNK1    | Distal Convolut Tubule |
| 0          | 0.29628081 | 0.278 | 0.025 | 0        | 22 | KNG1    | Distal Convolut Tubule |
| 7.339E-224 | 0.87672047 | 0.71  | 0.224 | 1.5E-219 | 22 | ATP1B1  | Distal Convolut Tubule |
| 7.152E-247 | 0.22088824 | 0.198 | 0.017 | 1.4E-242 | 22 | SFRP1   | Distal Convolut Tubule |
| 1.521E-134 | 0.66005921 | 0.669 | 0.261 | 3.1E-130 | 22 | SPP1    | Distal Convolut Tubule |
| 1.979E-169 | 0.28877028 | 0.315 | 0.056 | 4E-165   | 22 | KCNJ16  | Distal Convolut Tubule |
| 6.794E-122 | 0.53251643 | 0.571 | 0.206 | 1.4E-117 | 22 | FXD2    | Distal Convolut Tubule |
| 2.469E-146 | 0.21246869 | 0.259 | 0.043 | 5E-142   | 22 | CA12    | Distal Convolut Tubule |
| 2.502E-105 | 0.30696324 | 0.334 | 0.088 | 5.1E-101 | 22 | EMX2    | Distal Convolut Tubule |
| 2.919E-95  | 0.20708821 | 0.259 | 0.059 | 5.9E-91  | 22 | CDH16   | Distal Convolut Tubule |
| 3.1986E-68 | 0.33809666 | 0.434 | 0.167 | 6.46E-64 | 22 | WFDC2   | Distal Convolut Tubule |
| 3.0823E-82 | 0.26209499 | 0.345 | 0.107 | 6.23E-78 | 22 | ATP1A1  | Distal Convolut Tubule |
| 2.298E-83  | 0.21897424 | 0.287 | 0.077 | 4.64E-79 | 22 | MUC1    | Distal Convolut Tubule |
| 8.5892E-64 | 0.25144209 | 0.406 | 0.155 | 1.74E-59 | 22 | CD24    | Distal Convolut Tubule |
| 6.485E-46  | 0.25045486 | 0.387 | 0.18  | 1.31E-41 | 22 | WSB1    | Distal Convolut Tubule |
| 9.6742E-32 | 0.25758196 | 0.573 | 0.376 | 1.95E-27 | 22 | ATP5I   | Distal Convolut Tubule |
| 2.365E-28  | 0.20753901 | 0.413 | 0.233 | 4.78E-24 | 22 | DSTN    | Distal Convolut Tubule |

|            |            |       |       |          |    |          |                         |
|------------|------------|-------|-------|----------|----|----------|-------------------------|
| 1.4926E-46 | 0.33897667 | 0.986 | 0.952 | 3.02E-42 | 22 | MT-ND1   | Distal Convolutd Tubule |
| 1.6594E-26 | 0.31131971 | 0.875 | 0.792 | 3.35E-22 | 22 | MT-ND4L  | Distal Convolutd Tubule |
| 1.4703E-31 | 0.28789638 | 0.942 | 0.886 | 2.97E-27 | 22 | MT-ND5   | Distal Convolutd Tubule |
| 6.4648E-54 | 0.27989203 | 1     | 1     | 1.31E-49 | 22 | MT-CO3   | Distal Convolutd Tubule |
| 1.8527E-44 | 0.24936194 | 1     | 1     | 3.74E-40 | 22 | MT-CO1   | Distal Convolutd Tubule |
| 7.4237E-23 | -0.2119404 | 0.011 | 0.15  | 1.5E-18  | 22 | FCER1G   | Distal Convolutd Tubule |
| 1.5039E-14 | -0.209187  | 0.016 | 0.111 | 3.04E-10 | 22 | CCL3     | Distal Convolutd Tubule |
| 4.8979E-26 | -0.2614834 | 0.023 | 0.187 | 9.9E-22  | 22 | TYROBP   | Distal Convolutd Tubule |
| 9.6498E-17 | -0.2445881 | 0.017 | 0.125 | 1.95E-12 | 22 | C1QA     | Distal Convolutd Tubule |
| 3.1717E-22 | -0.214129  | 0.027 | 0.171 | 6.41E-18 | 22 | HLA-DPB1 | Distal Convolutd Tubule |
| 2.45E-17   | -0.2036199 | 0.034 | 0.154 | 4.95E-13 | 22 | RGS1     | Distal Convolutd Tubule |
| 1.4337E-14 | -0.2151484 | 0.028 | 0.13  | 2.9E-10  | 22 | CXCL2    | Distal Convolutd Tubule |
| 5.6254E-17 | -0.2144846 | 0.037 | 0.158 | 1.14E-12 | 22 | CCL5     | Distal Convolutd Tubule |
| 1.753E-31  | -0.2615342 | 0.053 | 0.258 | 3.54E-27 | 22 | VIM      | Distal Convolutd Tubule |
| 2.4706E-43 | -0.3583062 | 0.045 | 0.295 | 4.99E-39 | 22 | SRGN     | Distal Convolutd Tubule |
| 5.1036E-23 | -0.2612495 | 0.041 | 0.194 | 1.03E-18 | 22 | AIF1     | Distal Convolutd Tubule |
| 1.0408E-23 | -0.2188881 | 0.058 | 0.224 | 2.1E-19  | 22 | NFKBIA   | Distal Convolutd Tubule |
| 6.5381E-19 | -0.3181569 | 0.028 | 0.154 | 1.32E-14 | 22 | LYZ      | Distal Convolutd Tubule |
| 3.5583E-23 | -0.2024544 | 0.072 | 0.241 | 7.19E-19 | 22 | SH3BGRL3 | Distal Convolutd Tubule |
| 2.1373E-32 | -0.2777708 | 0.058 | 0.265 | 4.32E-28 | 22 | ZFP36    | Distal Convolutd Tubule |
| 1.4697E-23 | -0.2371903 | 0.056 | 0.218 | 2.97E-19 | 22 | CXCR4    | Distal Convolutd Tubule |
| 4.4071E-20 | -0.2073028 | 0.103 | 0.265 | 8.91E-16 | 22 | FOSB     | Distal Convolutd Tubule |
| 4.8436E-28 | -0.2541187 | 0.094 | 0.292 | 9.79E-24 | 22 | CYBA     | Distal Convolutd Tubule |
| 2.2607E-10 | -0.2319463 | 0.053 | 0.141 | 4.57E-06 | 22 | TIMP1    | Distal Convolutd Tubule |
| 8.4447E-20 | -0.209529  | 0.19  | 0.361 | 1.71E-15 | 22 | HLA-B    | Distal Convolutd Tubule |
| 1.9922E-25 | -0.2528213 | 0.165 | 0.375 | 4.03E-21 | 22 | PABPC1   | Distal Convolutd Tubule |
| 3.9644E-25 | -0.2315985 | 0.192 | 0.397 | 8.01E-21 | 22 | RPS5     | Distal Convolutd Tubule |
| 4.1482E-22 | -0.3205395 | 0.109 | 0.281 | 8.38E-18 | 22 | LGALS1   | Distal Convolutd Tubule |
| 1.4524E-23 | -0.2250568 | 0.262 | 0.462 | 2.93E-19 | 22 | RPL19    | Distal Convolutd Tubule |
| 1.4292E-20 | -0.2073875 | 0.312 | 0.504 | 2.89E-16 | 22 | RPL27A   | Distal Convolutd Tubule |
| 5.1172E-20 | -0.2211461 | 0.248 | 0.427 | 1.03E-15 | 22 | RPS3     | Distal Convolutd Tubule |
| 1.2908E-20 | -0.2168384 | 0.285 | 0.471 | 2.61E-16 | 22 | RPS13    | Distal Convolutd Tubule |
| 4.2378E-17 | -0.200369  | 0.345 | 0.522 | 8.56E-13 | 22 | RPL35A   | Distal Convolutd Tubule |
| 1.7593E-17 | -0.2072079 | 0.328 | 0.496 | 3.56E-13 | 22 | RPS26    | Distal Convolutd Tubule |
| 2.781E-26  | -0.2613163 | 0.231 | 0.434 | 5.62E-22 | 22 | H3F3B    | Distal Convolutd Tubule |
| 1.1351E-18 | -0.2231863 | 0.373 | 0.55  | 2.29E-14 | 22 | RPL11    | Distal Convolutd Tubule |
| 3.0429E-43 | -0.6454839 | 0.078 | 0.332 | 6.15E-39 | 22 | HLA-DRA  | Distal Convolutd Tubule |
| 9.1173E-35 | -0.4272039 | 0.129 | 0.361 | 1.84E-30 | 22 | CD74     | Distal Convolutd Tubule |
| 1.5738E-14 | -0.2046259 | 0.432 | 0.568 | 3.18E-10 | 22 | RPL12    | Distal Convolutd Tubule |
| 3.9436E-33 | -0.3722227 | 0.165 | 0.391 | 7.97E-29 | 22 | DUSP1    | Distal Convolutd Tubule |
| 1.5266E-05 | -0.2382776 | 0.126 | 0.19  | 0.308493 | 22 | MT1X     | Distal Convolutd Tubule |
| 3.2086E-35 | -0.3391297 | 0.243 | 0.482 | 6.48E-31 | 22 | RPS2     | Distal Convolutd Tubule |
| 5.7648E-24 | -0.2650342 | 0.356 | 0.55  | 1.16E-19 | 22 | RPL23A   | Distal Convolutd Tubule |
| 7.8064E-27 | -0.2829719 | 0.328 | 0.533 | 1.58E-22 | 22 | RPS3A    | Distal Convolutd Tubule |
| 1.5611E-21 | -0.2543554 | 0.407 | 0.588 | 3.15E-17 | 22 | RPL26    | Distal Convolutd Tubule |
| 2.5086E-23 | -0.2556773 | 0.415 | 0.594 | 5.07E-19 | 22 | RPLP2    | Distal Convolutd Tubule |
| 8.2708E-38 | -0.3431358 | 0.303 | 0.559 | 1.67E-33 | 22 | RPL18A   | Distal Convolutd Tubule |
| 1.246E-30  | -0.2987171 | 0.354 | 0.568 | 2.52E-26 | 22 | TPT1     | Distal Convolutd Tubule |

|            |            |       |       |          |    |           |                         |
|------------|------------|-------|-------|----------|----|-----------|-------------------------|
| 1.5634E-21 | -0.2636434 | 0.443 | 0.612 | 3.16E-17 | 22 | RPS12     | Distal Convolutd Tubule |
| 2.1688E-16 | -0.2129771 | 0.711 | 0.772 | 4.38E-12 | 22 | RPS27A    | Distal Convolutd Tubule |
| 5.2541E-17 | -0.2417137 | 0.588 | 0.694 | 1.06E-12 | 22 | RPS8      | Distal Convolutd Tubule |
| 7.6305E-33 | -0.3250432 | 0.379 | 0.596 | 1.54E-28 | 22 | RPL28     | Distal Convolutd Tubule |
| 9.8826E-18 | -0.2209818 | 0.816 | 0.847 | 2E-13    | 22 | PTMA      | Distal Convolutd Tubule |
| 1.0879E-37 | -0.3575729 | 0.36  | 0.603 | 2.2E-33  | 22 | RPS15A    | Distal Convolutd Tubule |
| 4.3638E-11 | -0.2391101 | 0.626 | 0.694 | 8.82E-07 | 22 | NEAT1     | Distal Convolutd Tubule |
| 1.0892E-25 | -0.2758598 | 0.643 | 0.766 | 2.2E-21  | 22 | RPL32     | Distal Convolutd Tubule |
| 2.6734E-34 | -0.299992  | 0.64  | 0.786 | 5.4E-30  | 22 | RPS15     | Distal Convolutd Tubule |
| 6.934E-36  | -0.3100048 | 0.672 | 0.805 | 1.4E-31  | 22 | RPLP1     | Distal Convolutd Tubule |
| 3.6899E-24 | -0.2706332 | 0.934 | 0.947 | 7.46E-20 | 22 | RPL34     | Distal Convolutd Tubule |
| 1.6198E-32 | -0.3082342 | 0.693 | 0.796 | 3.27E-28 | 22 | RPL13A    | Distal Convolutd Tubule |
| 1.0782E-33 | -0.3158259 | 0.702 | 0.823 | 2.18E-29 | 22 | RPL13     | Distal Convolutd Tubule |
| 1.3232E-24 | -0.2997425 | 0.739 | 0.814 | 2.67E-20 | 22 | RPS18     | Distal Convolutd Tubule |
| 4.1604E-23 | -0.4142427 | 0.407 | 0.569 | 8.41E-19 | 22 | FTH1      | Distal Convolutd Tubule |
| 1.1997E-37 | -0.3513408 | 0.663 | 0.786 | 2.42E-33 | 22 | RPL10     | Distal Convolutd Tubule |
| 5.6016E-43 | -0.3757349 | 0.647 | 0.805 | 1.13E-38 | 22 | RPS19     | Distal Convolutd Tubule |
| 6.065E-38  | -0.3301431 | 0.885 | 0.908 | 1.23E-33 | 22 | RPL21     | Distal Convolutd Tubule |
| 4.7729E-37 | -0.437245  | 0.49  | 0.659 | 9.65E-33 | 22 | ACTB      | Distal Convolutd Tubule |
| 8.5074E-42 | -0.3540804 | 0.902 | 0.947 | 1.72E-37 | 22 | RPS27     | Distal Convolutd Tubule |
| 5.5668E-39 | -0.3844522 | 0.805 | 0.872 | 1.12E-34 | 22 | RPL39     | Distal Convolutd Tubule |
| 1.647E-36  | -0.5343916 | 0.392 | 0.586 | 3.33E-32 | 22 | FOS       | Distal Convolutd Tubule |
| 2.1007E-50 | -0.4670615 | 0.651 | 0.795 | 4.25E-46 | 22 | TMSB10    | Distal Convolutd Tubule |
| 4.326E-111 | -0.7786703 | 0.694 | 0.889 | 8.7E-107 | 22 | TMSB4X    | Distal Convolutd Tubule |
| 6.5417E-25 | -0.7964098 | 0.605 | 0.704 | 1.32E-20 | 22 | FTL       | Distal Convolutd Tubule |
| 1.2939E-09 | -1.474952  | 0.08  | 0.169 | 2.61E-05 | 22 | IGKC      | Distal Convolutd Tubule |
| 1.406E-121 | -0.8417932 | 0.852 | 0.956 | 2.8E-117 | 22 | B2M       | Distal Convolutd Tubule |
| 0          | 1.18218031 | 0.955 | 0.007 | 0        | 23 | CALB1     | Connecting Tubule       |
| 0          | 0.25717771 | 0.139 | 0.004 | 0        | 23 | KLK1      | Connecting Tubule       |
| 2.229E-139 | 0.86293203 | 0.52  | 0.166 | 4.5E-135 | 23 | DEFB1     | Connecting Tubule       |
| 3.402E-116 | 0.30764126 | 0.229 | 0.041 | 6.9E-112 | 23 | TMEM52B   | Connecting Tubule       |
| 8.7475E-91 | 0.69867753 | 0.533 | 0.226 | 1.77E-86 | 23 | ATP1B1    | Connecting Tubule       |
| 1.1471E-96 | 0.26409572 | 0.178 | 0.031 | 2.32E-92 | 23 | SLC8A1    | Connecting Tubule       |
| 1.9569E-86 | 0.22389886 | 0.185 | 0.035 | 3.95E-82 | 23 | SPINK1    | Connecting Tubule       |
| 6.0899E-68 | 0.31309737 | 0.436 | 0.167 | 1.23E-63 | 23 | WFDC2     | Connecting Tubule       |
| 5.7277E-46 | 0.32367545 | 0.365 | 0.166 | 1.16E-41 | 23 | MTRNR2L12 | Connecting Tubule       |
| 5.141E-101 | 0.58940033 | 0.947 | 0.791 | 1.04E-96 | 23 | MT-ND4L   | Connecting Tubule       |
| 2.1095E-41 | 0.2309352  | 0.209 | 0.072 | 4.26E-37 | 23 | WNK1      | Connecting Tubule       |
| 6.0504E-42 | 0.29665934 | 0.423 | 0.208 | 1.22E-37 | 23 | FXD2      | Connecting Tubule       |
| 6.552E-105 | 0.51897866 | 0.977 | 0.885 | 1.3E-100 | 23 | MT-ND5    | Connecting Tubule       |
| 2.324E-130 | 0.54070514 | 1     | 0.951 | 4.7E-126 | 23 | MT-ND1    | Connecting Tubule       |
| 5.0894E-29 | 0.30082528 | 0.345 | 0.193 | 1.03E-24 | 23 | MT-ATP8   | Connecting Tubule       |
| 1.6881E-34 | 0.25126785 | 0.326 | 0.153 | 3.41E-30 | 23 | HES1      | Connecting Tubule       |
| 2.9864E-42 | 0.24789036 | 0.499 | 0.263 | 6.03E-38 | 23 | SPP1      | Connecting Tubule       |
| 2.4055E-29 | 0.21046138 | 0.36  | 0.186 | 4.86E-25 | 23 | CLU       | Connecting Tubule       |
| 4.0069E-75 | 0.33885495 | 0.997 | 0.989 | 8.1E-71  | 23 | MT-CYB    | Connecting Tubule       |
| 1.3524E-13 | 0.21556057 | 0.308 | 0.208 | 2.73E-09 | 23 | HSPB1     | Connecting Tubule       |
| 3.7252E-86 | 0.3186857  | 1     | 1     | 7.53E-82 | 23 | MT-CO2    | Connecting Tubule       |

|            |            |       |       |          |    |         |                   |
|------------|------------|-------|-------|----------|----|---------|-------------------|
| 4.2069E-75 | 0.30227085 | 1     | 1     | 8.5E-71  | 23 | MT-CO3  | Connecting Tubule |
| 2.9429E-60 | 0.26467307 | 1     | 1     | 5.95E-56 | 23 | MT-ND4  | Connecting Tubule |
| 2.3102E-12 | 0.21214267 | 0.464 | 0.378 | 4.67E-08 | 23 | ATP5I   | Connecting Tubule |
| 2.5702E-46 | 0.24940596 | 1     | 1     | 5.19E-42 | 23 | MT-CO1  | Connecting Tubule |
| 1.4182E-37 | 0.22195403 | 1     | 0.996 | 2.87E-33 | 23 | MT-ATP6 | Connecting Tubule |
| 8.1381E-23 | -0.2129812 | 0.008 | 0.15  | 1.64E-18 | 23 | FCER1G  | Connecting Tubule |
| 3.8951E-23 | -0.2276449 | 0.01  | 0.154 | 7.87E-19 | 23 | RGS1    | Connecting Tubule |
| 4.5955E-51 | -0.3937286 | 0.015 | 0.296 | 9.29E-47 | 23 | SRGN    | Connecting Tubule |
| 4.1823E-18 | -0.25182   | 0.01  | 0.125 | 8.45E-14 | 23 | C1QA    | Connecting Tubule |
| 1.2462E-14 | -0.2125672 | 0.01  | 0.105 | 2.52E-10 | 23 | CTGF    | Connecting Tubule |
| 4.123E-15  | -0.2115908 | 0.011 | 0.111 | 8.33E-11 | 23 | CCL3    | Connecting Tubule |
| 9.3499E-33 | -0.264011  | 0.023 | 0.224 | 1.89E-28 | 23 | NFKBIA  | Connecting Tubule |
| 3.4121E-31 | -0.2720205 | 0.024 | 0.219 | 6.9E-27  | 23 | CXCR4   | Connecting Tubule |
| 2.3777E-25 | -0.2632348 | 0.023 | 0.186 | 4.8E-21  | 23 | TYROBP  | Connecting Tubule |
| 4.4739E-20 | -0.2263211 | 0.023 | 0.158 | 9.04E-16 | 23 | CCL5    | Connecting Tubule |
| 1.4423E-20 | -0.3197629 | 0.018 | 0.154 | 2.91E-16 | 23 | LYZ     | Connecting Tubule |
| 3.4287E-23 | -0.2607143 | 0.036 | 0.194 | 6.93E-19 | 23 | AIF1    | Connecting Tubule |
| 4.8081E-33 | -0.277905  | 0.049 | 0.265 | 9.72E-29 | 23 | ZFP36   | Connecting Tubule |
| 3.6429E-24 | -0.2054756 | 0.071 | 0.257 | 7.36E-20 | 23 | VIM     | Connecting Tubule |
| 2.1605E-12 | -0.2102335 | 0.036 | 0.13  | 4.37E-08 | 23 | CXCL2   | Connecting Tubule |
| 1.4907E-14 | -0.2565374 | 0.032 | 0.141 | 3.01E-10 | 23 | TIMP1   | Connecting Tubule |
| 8.7011E-32 | -0.2433371 | 0.073 | 0.294 | 1.76E-27 | 23 | PFN1    | Connecting Tubule |
| 2.0953E-22 | -0.2272354 | 0.063 | 0.232 | 4.23E-18 | 23 | S100A4  | Connecting Tubule |
| 1.5341E-30 | -0.2583302 | 0.075 | 0.293 | 3.1E-26  | 23 | CYBA    | Connecting Tubule |
| 1.0395E-23 | -0.2222117 | 0.081 | 0.265 | 2.1E-19  | 23 | FOSB    | Connecting Tubule |
| 7.5681E-23 | -0.2164443 | 0.092 | 0.276 | 1.53E-18 | 23 | BTG1    | Connecting Tubule |
| 6.8432E-19 | -0.2207926 | 0.113 | 0.279 | 1.38E-14 | 23 | CST3    | Connecting Tubule |
| 6.0208E-30 | -0.2533041 | 0.133 | 0.362 | 1.22E-25 | 23 | HLA-B   | Connecting Tubule |
| 2.216E-20  | -0.2154115 | 0.178 | 0.375 | 4.48E-16 | 23 | PABPC1  | Connecting Tubule |
| 7.8913E-29 | -0.2541628 | 0.185 | 0.428 | 1.59E-24 | 23 | RPS3    | Connecting Tubule |
| 4.8001E-48 | -0.4384123 | 0.099 | 0.391 | 9.7E-44  | 23 | DUSP1   | Connecting Tubule |
| 1.7088E-21 | -0.3063473 | 0.102 | 0.281 | 3.45E-17 | 23 | LGALS1  | Connecting Tubule |
| 4.6183E-36 | -0.2933548 | 0.165 | 0.435 | 9.33E-32 | 23 | H3F3B   | Connecting Tubule |
| 1.8757E-12 | -0.2784661 | 0.078 | 0.19  | 3.79E-08 | 23 | MT1X    | Connecting Tubule |
| 2.7882E-31 | -0.2732485 | 0.22  | 0.472 | 5.63E-27 | 23 | RPS13   | Connecting Tubule |
| 8.8101E-22 | -0.2253478 | 0.303 | 0.527 | 1.78E-17 | 23 | RPS24   | Connecting Tubule |
| 1.9919E-24 | -0.2382148 | 0.276 | 0.505 | 4.03E-20 | 23 | RPL27A  | Connecting Tubule |
| 1.8371E-44 | -0.6581793 | 0.066 | 0.332 | 3.71E-40 | 23 | HLA-DRA | Connecting Tubule |
| 5.5347E-36 | -0.4217522 | 0.113 | 0.361 | 1.12E-31 | 23 | CD74    | Connecting Tubule |
| 2.9575E-19 | -0.217992  | 0.348 | 0.569 | 5.98E-15 | 23 | RPL12   | Connecting Tubule |
| 2.3868E-30 | -0.273024  | 0.245 | 0.497 | 4.82E-26 | 23 | RPS26   | Connecting Tubule |
| 3.7247E-19 | -0.206441  | 0.426 | 0.64  | 7.53E-15 | 23 | RPL36   | Connecting Tubule |
| 4.3759E-31 | -0.2774864 | 0.264 | 0.523 | 8.84E-27 | 23 | RPL35A  | Connecting Tubule |
| 6.4164E-22 | -0.2376124 | 0.339 | 0.551 | 1.3E-17  | 23 | RPL11   | Connecting Tubule |
| 3.8616E-22 | -0.2290844 | 0.408 | 0.633 | 7.8E-18  | 23 | RPL35   | Connecting Tubule |
| 7.5085E-31 | -0.3062957 | 0.233 | 0.482 | 1.52E-26 | 23 | RPS2    | Connecting Tubule |
| 1.5479E-25 | -0.252568  | 0.352 | 0.595 | 3.13E-21 | 23 | RPLP2   | Connecting Tubule |
| 1.6009E-25 | -0.2639611 | 0.319 | 0.551 | 3.24E-21 | 23 | RPL23A  | Connecting Tubule |

|            |            |       |       |          |    |           |                     |
|------------|------------|-------|-------|----------|----|-----------|---------------------|
| 5.1784E-25 | -0.2625339 | 0.379 | 0.613 | 1.05E-20 | 23 | RPS12     | Connecting Tubule   |
| 2.5913E-40 | -0.3480206 | 0.263 | 0.56  | 5.24E-36 | 23 | RPL18A    | Connecting Tubule   |
| 1.4035E-48 | -0.3737851 | 0.254 | 0.569 | 2.84E-44 | 23 | TPT1      | Connecting Tubule   |
| 2.3672E-36 | -0.3399012 | 0.274 | 0.533 | 4.78E-32 | 23 | RPS3A     | Connecting Tubule   |
| 9.1216E-27 | -0.2910933 | 0.357 | 0.588 | 1.84E-22 | 23 | RPL26     | Connecting Tubule   |
| 1.9385E-39 | -0.341227  | 0.316 | 0.597 | 3.92E-35 | 23 | RPL28     | Connecting Tubule   |
| 5.7619E-17 | -0.2073336 | 0.707 | 0.785 | 1.16E-12 | 23 | RPS15     | Connecting Tubule   |
| 1.58E-42   | -0.3737361 | 0.31  | 0.604 | 3.19E-38 | 23 | RPS15A    | Connecting Tubule   |
| 9.8292E-08 | -0.282119  | 0.245 | 0.359 | 0.001986 | 23 | MT2A      | Connecting Tubule   |
| 4.0923E-18 | -0.2285071 | 0.721 | 0.804 | 8.27E-14 | 23 | RPLP1     | Connecting Tubule   |
| 6.2913E-21 | -0.262628  | 0.546 | 0.695 | 1.27E-16 | 23 | RPS8      | Connecting Tubule   |
| 3.6447E-21 | -0.2520321 | 0.705 | 0.795 | 7.37E-17 | 23 | RPL13A    | Connecting Tubule   |
| 6.0437E-25 | -0.2707289 | 0.668 | 0.772 | 1.22E-20 | 23 | RPS27A    | Connecting Tubule   |
| 4.5259E-17 | -0.3426705 | 0.405 | 0.569 | 9.15E-13 | 23 | FTH1      | Connecting Tubule   |
| 2.0684E-24 | -0.2724381 | 0.737 | 0.822 | 4.18E-20 | 23 | RPL13     | Connecting Tubule   |
| 1.2048E-20 | -0.2493068 | 1     | 0.997 | 2.43E-16 | 23 | MALAT1    | Connecting Tubule   |
| 2.7542E-26 | -0.269125  | 0.804 | 0.847 | 5.57E-22 | 23 | PTMA      | Connecting Tubule   |
| 2.0762E-23 | -0.2895301 | 0.728 | 0.804 | 4.2E-19  | 23 | RPS19     | Connecting Tubule   |
| 6.7988E-32 | -0.3251498 | 0.661 | 0.786 | 1.37E-27 | 23 | RPL10     | Connecting Tubule   |
| 1.0194E-27 | -0.3738094 | 0.483 | 0.659 | 2.06E-23 | 23 | ACTB      | Connecting Tubule   |
| 2.1483E-29 | -0.3097222 | 0.875 | 0.908 | 4.34E-25 | 23 | RPL21     | Connecting Tubule   |
| 1.0287E-30 | -0.3113444 | 0.925 | 0.947 | 2.08E-26 | 23 | RPL34     | Connecting Tubule   |
| 1.3986E-43 | -0.4255083 | 0.655 | 0.795 | 2.83E-39 | 23 | TMSB10    | Connecting Tubule   |
| 2.0059E-32 | -0.5266622 | 0.399 | 0.585 | 4.05E-28 | 23 | FOS       | Connecting Tubule   |
| 0.00995829 | -0.4519564 | 0.177 | 0.217 | 1        | 23 | MT1G      | Connecting Tubule   |
| 2.2118E-15 | -1.4659662 | 0.049 | 0.169 | 4.47E-11 | 23 | IGKC      | Connecting Tubule   |
| 4.3903E-61 | -0.4822533 | 0.796 | 0.872 | 8.87E-57 | 23 | RPL39     | Connecting Tubule   |
| 2.4565E-67 | -0.6256588 | 0.841 | 0.887 | 4.96E-63 | 23 | TMSB4X    | Connecting Tubule   |
| 6.8321E-20 | -0.7803344 | 0.639 | 0.703 | 1.38E-15 | 23 | FTL       | Connecting Tubule   |
| 6.951E-150 | -0.9918222 | 0.874 | 0.956 | 1.4E-145 | 23 | B2M       | Connecting Tubule   |
| 0          | 1.04774895 | 1     | 0.02  | 0        | 24 | MTRNR2L1  | Immune/Granulocytes |
| 9.1436E-69 | 0.429491   | 0.405 | 0.165 | 1.85E-64 | 24 | MTRNR2L12 | Immune/Granulocytes |
| 9.6437E-79 | 0.38765524 | 0.448 | 0.167 | 1.95E-74 | 24 | WFDC2     | Immune/Granulocytes |
| 8.665E-185 | 0.75847998 | 0.987 | 0.791 | 1.8E-180 | 24 | MT-ND4L   | Immune/Granulocytes |
| 1.6698E-52 | 0.30229129 | 0.417 | 0.185 | 3.37E-48 | 24 | CLU       | Immune/Granulocytes |
| 4.376E-147 | 0.59822773 | 0.997 | 0.885 | 8.8E-143 | 24 | MT-ND5    | Immune/Granulocytes |
| 4.5259E-42 | 0.3406398  | 0.377 | 0.192 | 9.15E-38 | 24 | MT-ATP8   | Immune/Granulocytes |
| 2.781E-148 | 0.59585524 | 0.995 | 0.951 | 5.6E-144 | 24 | MT-ND1    | Immune/Granulocytes |
| 4.6712E-29 | 0.22621464 | 0.334 | 0.168 | 9.44E-25 | 24 | DEFB1     | Immune/Granulocytes |
| 1.1953E-82 | 0.34915903 | 1     | 0.989 | 2.42E-78 | 24 | MT-CYB    | Immune/Granulocytes |
| 6.0824E-11 | 0.21183684 | 0.29  | 0.208 | 1.23E-06 | 24 | HSPB1     | Immune/Granulocytes |
| 9.2217E-66 | 0.23725008 | 1     | 1     | 1.86E-61 | 24 | MT-CO2    | Immune/Granulocytes |
| 3.4196E-43 | 0.21391913 | 1     | 0.996 | 6.91E-39 | 24 | MT-ATP6   | Immune/Granulocytes |
| 5.3155E-48 | 0.2062472  | 1     | 1     | 1.07E-43 | 24 | MT-ND4    | Immune/Granulocytes |
| 1.3799E-16 | -0.2178553 | 0.005 | 0.111 | 2.79E-12 | 24 | CCL3      | Immune/Granulocytes |
| 6.444E-23  | -0.2160508 | 0.007 | 0.15  | 1.3E-18  | 24 | FCER1G    | Immune/Granulocytes |
| 3.765E-18  | -0.2499458 | 0.008 | 0.125 | 7.61E-14 | 24 | C1QA      | Immune/Granulocytes |
| 1.4168E-27 | -0.2739982 | 0.013 | 0.187 | 2.86E-23 | 24 | TYROBP    | Immune/Granulocytes |

|            |            |       |       |          |    |          |                     |
|------------|------------|-------|-------|----------|----|----------|---------------------|
| 1.3731E-49 | -0.3884534 | 0.016 | 0.296 | 2.77E-45 | 24 | SRGN     | Immune/Granulocytes |
| 4.2312E-20 | -0.2046604 | 0.018 | 0.154 | 8.55E-16 | 24 | RGS1     | Immune/Granulocytes |
| 1.1056E-17 | -0.2399278 | 0.013 | 0.13  | 2.23E-13 | 24 | CXCL2    | Immune/Granulocytes |
| 2.567E-22  | -0.2169498 | 0.021 | 0.171 | 5.19E-18 | 24 | HLA-DPB1 | Immune/Granulocytes |
| 2.9674E-21 | -0.3320489 | 0.015 | 0.154 | 6E-17    | 24 | LYZ      | Immune/Granulocytes |
| 8.4356E-29 | -0.2364182 | 0.031 | 0.224 | 1.7E-24  | 24 | NFKBIA   | Immune/Granulocytes |
| 6.2606E-19 | -0.2255832 | 0.026 | 0.158 | 1.27E-14 | 24 | CCL5     | Immune/Granulocytes |
| 3.8275E-27 | -0.2124665 | 0.048 | 0.242 | 7.73E-23 | 24 | SH3BGRL3 | Immune/Granulocytes |
| 4.5758E-26 | -0.2412932 | 0.04  | 0.218 | 9.25E-22 | 24 | CXCR4    | Immune/Granulocytes |
| 8.5513E-22 | -0.2426207 | 0.038 | 0.194 | 1.73E-17 | 24 | AIF1     | Immune/Granulocytes |
| 3.0796E-31 | -0.2674624 | 0.051 | 0.265 | 6.22E-27 | 24 | ZFP36    | Immune/Granulocytes |
| 1.7074E-25 | -0.2225778 | 0.064 | 0.257 | 3.45E-21 | 24 | VIM      | Immune/Granulocytes |
| 2.1584E-27 | -0.2077553 | 0.081 | 0.294 | 4.36E-23 | 24 | PFN1     | Immune/Granulocytes |
| 7.97E-24   | -0.2056412 | 0.082 | 0.276 | 1.61E-19 | 24 | BTG1     | Immune/Granulocytes |
| 2.089E-20  | -0.2121844 | 0.069 | 0.232 | 4.22E-16 | 24 | S100A4   | Immune/Granulocytes |
| 8.4523E-23 | -0.2100202 | 0.081 | 0.265 | 1.71E-18 | 24 | FOSB     | Immune/Granulocytes |
| 1.5712E-29 | -0.2532536 | 0.082 | 0.305 | 3.18E-25 | 24 | KLF6     | Immune/Granulocytes |
| 6.4218E-22 | -0.2073615 | 0.104 | 0.292 | 1.3E-17  | 24 | CYBA     | Immune/Granulocytes |
| 1.2429E-30 | -0.2394912 | 0.115 | 0.362 | 2.51E-26 | 24 | HLA-B    | Immune/Granulocytes |
| 1.5816E-23 | -0.2002852 | 0.14  | 0.363 | 3.2E-19  | 24 | CALM2    | Immune/Granulocytes |
| 2.4414E-10 | -0.2245805 | 0.049 | 0.141 | 4.93E-06 | 24 | TIMP1    | Immune/Granulocytes |
| 1.1786E-23 | -0.2536489 | 0.089 | 0.281 | 2.38E-19 | 24 | EGR1     | Immune/Granulocytes |
| 3.1966E-28 | -0.2177048 | 0.18  | 0.443 | 6.46E-24 | 24 | RPL9     | Immune/Granulocytes |
| 1.5982E-47 | -0.337662  | 0.117 | 0.436 | 3.23E-43 | 24 | H3F3B    | Immune/Granulocytes |
| 2.7061E-26 | -0.217256  | 0.198 | 0.453 | 5.47E-22 | 24 | RPS4X    | Immune/Granulocytes |
| 8.3411E-45 | -0.402241  | 0.096 | 0.391 | 1.69E-40 | 24 | DUSP1    | Immune/Granulocytes |
| 2.4582E-22 | -0.2209184 | 0.189 | 0.415 | 4.97E-18 | 24 | ITM2B    | Immune/Granulocytes |
| 2.9507E-31 | -0.2495304 | 0.191 | 0.472 | 5.96E-27 | 24 | RPS13    | Immune/Granulocytes |
| 3.173E-26  | -0.2247789 | 0.231 | 0.498 | 6.41E-22 | 24 | RPL7     | Immune/Granulocytes |
| 4.3276E-25 | -0.2227798 | 0.244 | 0.505 | 8.75E-21 | 24 | RPL27A   | Immune/Granulocytes |
| 1.8933E-21 | -0.204064  | 0.295 | 0.551 | 3.83E-17 | 24 | RPL11    | Immune/Granulocytes |
| 1.1698E-33 | -0.2680054 | 0.204 | 0.497 | 2.36E-29 | 24 | RPS26    | Immune/Granulocytes |
| 4.2702E-23 | -0.2198189 | 0.27  | 0.523 | 8.63E-19 | 24 | RPL35A   | Immune/Granulocytes |
| 2.1496E-11 | -0.2181435 | 0.15  | 0.28  | 4.34E-07 | 24 | LGALS1   | Immune/Granulocytes |
| 7.578E-22  | -0.2115801 | 0.338 | 0.595 | 1.53E-17 | 24 | RPLP2    | Immune/Granulocytes |
| 2.5356E-08 | -0.2391739 | 0.099 | 0.19  | 0.000512 | 24 | MT1X     | Immune/Granulocytes |
| 3.5438E-19 | -0.2086498 | 0.359 | 0.596 | 7.16E-15 | 24 | RPL28    | Immune/Granulocytes |
| 1.7041E-46 | -0.355752  | 0.194 | 0.534 | 3.44E-42 | 24 | RPS3A    | Immune/Granulocytes |
| 4.8414E-22 | -0.2323346 | 0.315 | 0.559 | 9.78E-18 | 24 | RPL18A   | Immune/Granulocytes |
| 3.7171E-34 | -0.3109485 | 0.203 | 0.482 | 7.51E-30 | 24 | RPS2     | Immune/Granulocytes |
| 1.1857E-19 | -0.2141333 | 0.402 | 0.641 | 2.4E-15  | 24 | RPL36    | Immune/Granulocytes |
| 3.5508E-17 | -0.2208165 | 0.392 | 0.612 | 7.18E-13 | 24 | RPS12    | Immune/Granulocytes |
| 7.2921E-49 | -0.3742503 | 0.222 | 0.57  | 1.47E-44 | 24 | TPT1     | Immune/Granulocytes |
| 1.8225E-40 | -0.6372586 | 0.076 | 0.332 | 3.68E-36 | 24 | HLA-DRA  | Immune/Granulocytes |
| 6.7478E-32 | -0.296298  | 0.301 | 0.589 | 1.36E-27 | 24 | RPL26    | Immune/Granulocytes |
| 1.2878E-16 | -0.2916758 | 0.191 | 0.36  | 2.6E-12  | 24 | CD74     | Immune/Granulocytes |
| 5.3053E-42 | -0.3612246 | 0.275 | 0.604 | 1.07E-37 | 24 | RPS15A   | Immune/Granulocytes |
| 0.00035009 | -0.2437107 | 0.277 | 0.358 | 1        | 24 | MT2A     | Immune/Granulocytes |

|            |            |       |       |          |    |          |                               |
|------------|------------|-------|-------|----------|----|----------|-------------------------------|
| 8.1738E-13 | -0.2116626 | 0.753 | 0.785 | 1.65E-08 | 24 | RPL10    | Immune/Granulocytes           |
| 4.4106E-19 | -0.2179851 | 0.83  | 0.847 | 8.91E-15 | 24 | PTMA     | Immune/Granulocytes           |
| 5.2615E-20 | -0.2444262 | 0.682 | 0.772 | 1.06E-15 | 24 | RPS27A   | Immune/Granulocytes           |
| 6.7636E-11 | -0.2396618 | 0.629 | 0.694 | 1.37E-06 | 24 | NEAT1    | Immune/Granulocytes           |
| 1.2623E-22 | -0.3782317 | 0.348 | 0.57  | 2.55E-18 | 24 | FTH1     | Immune/Granulocytes           |
| 5.7349E-12 | -0.259297  | 0.811 | 0.793 | 1.16E-07 | 24 | TMSB10   | Immune/Granulocytes           |
| 1.1626E-32 | -0.3946859 | 0.45  | 0.659 | 2.35E-28 | 24 | ACTB     | Immune/Granulocytes           |
| 6.7502E-22 | -0.2675479 | 0.923 | 0.907 | 1.36E-17 | 24 | RPL21    | Immune/Granulocytes           |
| 3.508E-39  | -0.3449214 | 0.957 | 0.947 | 7.09E-35 | 24 | RPL34    | Immune/Granulocytes           |
| 5.7492E-52 | -0.6452479 | 0.325 | 0.586 | 1.16E-47 | 24 | FOS      | Immune/Granulocytes           |
| 0.00321546 | -0.4935664 | 0.171 | 0.217 | 1        | 24 | MT1G     | Immune/Granulocytes           |
| 1.0495E-53 | -0.4298175 | 1     | 0.997 | 2.12E-49 | 24 | MALAT1   | Immune/Granulocytes           |
| 2.633E-15  | -1.5591837 | 0.048 | 0.169 | 5.32E-11 | 24 | IGKC     | Immune/Granulocytes           |
| 4.028E-66  | -0.4994872 | 0.807 | 0.872 | 8.14E-62 | 24 | RPL39    | Immune/Granulocytes           |
| 2.1455E-62 | -0.6021264 | 0.916 | 0.886 | 4.34E-58 | 24 | TMSB4X   | Immune/Granulocytes           |
| 3.3526E-12 | -0.7471935 | 0.725 | 0.702 | 6.77E-08 | 24 | FTL      | Immune/Granulocytes           |
| 7.212E-138 | -0.933055  | 0.937 | 0.955 | 1.5E-133 | 24 | B2M      | Immune/Granulocytes           |
| 0          | 2.01896234 | 0.986 | 0.026 | 0        | 25 | CXCL10   | Immune/Monocytes, Neutrophils |
| 0          | 0.72210683 | 0.474 | 0.024 | 0        | 25 | CXCL9    | Immune/Monocytes, Neutrophils |
| 0          | 0.70037717 | 0.306 | 0.016 | 0        | 25 | CCL8     | Immune/Monocytes, Neutrophils |
| 0          | 0.37976032 | 0.268 | 0.008 | 0        | 25 | CXCL11   | Immune/Monocytes, Neutrophils |
| 0          | 0.6226009  | 0.608 | 0.045 | 0        | 25 | GBP1     | Immune/Monocytes, Neutrophils |
| 0          | 0.41790565 | 0.426 | 0.037 | 0        | 25 | FAM26F   | Immune/Monocytes, Neutrophils |
| 5.435E-251 | 0.52610154 | 0.36  | 0.043 | 1.1E-246 | 25 | C15orf48 | Immune/Monocytes, Neutrophils |
| 0          | 0.47967998 | 0.472 | 0.052 | 0        | 25 | PLEK     | Immune/Monocytes, Neutrophils |
| 3.444E-147 | 0.68238349 | 0.37  | 0.071 | 7E-143   | 25 | CCL2     | Immune/Monocytes, Neutrophils |
| 2.098E-299 | 0.29332014 | 0.29  | 0.024 | 4.2E-295 | 25 | GBP5     | Immune/Monocytes, Neutrophils |
| 9.657E-193 | 0.6545819  | 0.504 | 0.101 | 2E-188   | 25 | C1QB     | Immune/Monocytes, Neutrophils |
| 4.205E-235 | 0.67553801 | 0.644 | 0.143 | 8.5E-231 | 25 | FCER1G   | Immune/Monocytes, Neutrophils |
| 1.747E-189 | 0.55746348 | 0.438 | 0.081 | 3.5E-185 | 25 | ISG15    | Immune/Monocytes, Neutrophils |
| 1.231E-216 | 0.66886294 | 0.654 | 0.147 | 2.5E-212 | 25 | LYZ      | Immune/Monocytes, Neutrophils |
| 2.652E-267 | 0.30302682 | 0.34  | 0.036 | 5.4E-263 | 25 | TNFSF13B | Immune/Monocytes, Neutrophils |
| 3.025E-237 | 0.69445209 | 0.73  | 0.179 | 6.1E-233 | 25 | TYROBP   | Immune/Monocytes, Neutrophils |
| 5.332E-214 | 0.97870119 | 0.886 | 0.323 | 1.1E-209 | 25 | HLA-DRA  | Immune/Monocytes, Neutrophils |
| 5.615E-157 | 0.63297344 | 0.508 | 0.12  | 1.1E-152 | 25 | C1QA     | Immune/Monocytes, Neutrophils |
| 2.829E-202 | 0.6491635  | 0.706 | 0.187 | 5.7E-198 | 25 | AIF1     | Immune/Monocytes, Neutrophils |
| 1.304E-130 | 0.57168186 | 0.442 | 0.106 | 2.6E-126 | 25 | CCL3     | Immune/Monocytes, Neutrophils |
| 1.72E-212  | 0.4578282  | 0.534 | 0.106 | 3.5E-208 | 25 | STAT1    | Immune/Monocytes, Neutrophils |
| 1.269E-209 | 0.29971095 | 0.336 | 0.044 | 2.6E-205 | 25 | SNX10    | Immune/Monocytes, Neutrophils |
| 1.169E-196 | 0.52244076 | 0.578 | 0.132 | 2.4E-192 | 25 | SOD2     | Immune/Monocytes, Neutrophils |
| 1.169E-196 | 0.52244076 | 0.578 | 0.132 | 2.4E-192 | 25 | SOD2     | Immune/Monocytes, Neutrophils |
| 3.719E-211 | 0.28255731 | 0.324 | 0.041 | 7.5E-207 | 25 | WARS     | Immune/Monocytes, Neutrophils |
| 5.191E-112 | 0.37257497 | 0.276 | 0.051 | 1E-107   | 25 | CCL3L3   | Immune/Monocytes, Neutrophils |
| 2.3129E-90 | 0.45300759 | 0.324 | 0.078 | 4.67E-86 | 25 | APOC1    | Immune/Monocytes, Neutrophils |
| 2.099E-177 | 0.29789082 | 0.374 | 0.061 | 4.2E-173 | 25 | LAP3     | Immune/Monocytes, Neutrophils |
| 5.576E-173 | 0.22999355 | 0.276 | 0.035 | 1.1E-168 | 25 | GBP4     | Immune/Monocytes, Neutrophils |
| 3.271E-162 | 0.41088211 | 0.506 | 0.116 | 6.6E-158 | 25 | VAMP5    | Immune/Monocytes, Neutrophils |
| 5.195E-158 | 0.73383544 | 0.856 | 0.353 | 1E-153   | 25 | CD74     | Immune/Monocytes, Neutrophils |

|            |            |       |       |          |    |           |                               |
|------------|------------|-------|-------|----------|----|-----------|-------------------------------|
| 7.23E-158  | 0.40016549 | 0.532 | 0.127 | 1.5E-153 | 25 | CTSS      | Immune/Monocytes, Neutrophils |
| 4.217E-144 | 0.44526399 | 0.594 | 0.165 | 8.5E-140 | 25 | HLA-DPB1  | Immune/Monocytes, Neutrophils |
| 7.064E-147 | 0.35480315 | 0.446 | 0.099 | 1.4E-142 | 25 | TYMP      | Immune/Monocytes, Neutrophils |
| 3.688E-131 | 0.23593914 | 0.252 | 0.038 | 7.5E-127 | 25 | BCL2A1    | Immune/Monocytes, Neutrophils |
| 2.44E-114  | 0.35579868 | 0.39  | 0.09  | 4.9E-110 | 25 | 11-1143G9 | Immune/Monocytes, Neutrophils |
| 2.655E-130 | 0.27815627 | 0.322 | 0.06  | 5.4E-126 | 25 | CYBB      | Immune/Monocytes, Neutrophils |
| 2.975E-139 | 0.70116049 | 0.866 | 0.412 | 6E-135   | 25 | SAT1      | Immune/Monocytes, Neutrophils |
| 1.573E-113 | 0.42208121 | 0.496 | 0.144 | 3.2E-109 | 25 | GLUL      | Immune/Monocytes, Neutrophils |
| 5.233E-136 | 0.27816115 | 0.354 | 0.068 | 1.1E-131 | 25 | FGL2      | Immune/Monocytes, Neutrophils |
| 7.747E-111 | 0.38560585 | 0.45  | 0.12  | 1.6E-106 | 25 | CTSB      | Immune/Monocytes, Neutrophils |
| 4.17E-128  | 0.39343298 | 0.52  | 0.142 | 8.4E-124 | 25 | HLA-DPA1  | Immune/Monocytes, Neutrophils |
| 1.957E-123 | 0.46829164 | 0.62  | 0.203 | 4E-119   | 25 | NPC2      | Immune/Monocytes, Neutrophils |
| 6.132E-115 | 0.26133649 | 0.288 | 0.053 | 1.2E-110 | 25 | MSR1      | Immune/Monocytes, Neutrophils |
| 2.518E-112 | 0.32490713 | 0.374 | 0.086 | 5.1E-108 | 25 | CTSZ      | Immune/Monocytes, Neutrophils |
| 1.336E-107 | 0.26548802 | 0.286 | 0.055 | 2.7E-103 | 25 | C1QC      | Immune/Monocytes, Neutrophils |
| 4.304E-120 | 0.2850295  | 0.386 | 0.086 | 8.7E-116 | 25 | LST1      | Immune/Monocytes, Neutrophils |
| 2.171E-112 | 0.33701951 | 0.45  | 0.12  | 4.4E-108 | 25 | MARCKS    | Immune/Monocytes, Neutrophils |
| 1.623E-104 | 0.35678429 | 0.456 | 0.129 | 3.3E-100 | 25 | NAMPT     | Immune/Monocytes, Neutrophils |
| 2.737E-101 | 0.48911475 | 0.684 | 0.273 | 5.53E-97 | 25 | CST3      | Immune/Monocytes, Neutrophils |
| 7.934E-115 | 0.7619672  | 0.898 | 0.564 | 1.6E-110 | 25 | FTH1      | Immune/Monocytes, Neutrophils |
| 2.331E-125 | 0.88346242 | 0.942 | 0.7   | 4.7E-121 | 25 | FTL       | Immune/Monocytes, Neutrophils |
| 1.7782E-58 | 0.31936918 | 0.262 | 0.072 | 3.59E-54 | 25 | CXCL8     | Immune/Monocytes, Neutrophils |
| 1.7246E-89 | 0.41512568 | 0.568 | 0.207 | 3.49E-85 | 25 | PSAP      | Immune/Monocytes, Neutrophils |
| 5.922E-102 | 0.21666564 | 0.274 | 0.053 | 1.2E-97  | 25 | FCGR3A    | Immune/Monocytes, Neutrophils |
| 1.3295E-94 | 0.24590123 | 0.302 | 0.067 | 2.69E-90 | 25 | CD83      | Immune/Monocytes, Neutrophils |
| 5.7787E-80 | 0.43170588 | 0.556 | 0.219 | 1.17E-75 | 25 | NFKBIA    | Immune/Monocytes, Neutrophils |
| 8.2235E-90 | 0.46235219 | 0.68  | 0.288 | 1.66E-85 | 25 | SRGN      | Immune/Monocytes, Neutrophils |
| 3.0002E-88 | 0.26631031 | 0.346 | 0.088 | 6.06E-84 | 25 | MS4A6A    | Immune/Monocytes, Neutrophils |
| 1.9654E-89 | 0.27588435 | 0.36  | 0.095 | 3.97E-85 | 25 | PSME2     | Immune/Monocytes, Neutrophils |
| 1.0375E-66 | 0.33480835 | 0.388 | 0.126 | 2.1E-62  | 25 | CXCL2     | Immune/Monocytes, Neutrophils |
| 1.6E-116   | 0.71958012 | 0.926 | 0.654 | 3.2E-112 | 25 | ACTB      | Immune/Monocytes, Neutrophils |
| 2.5936E-54 | 0.27182627 | 0.23  | 0.062 | 5.24E-50 | 25 | CCL4L2    | Immune/Monocytes, Neutrophils |
| 2.8156E-86 | 0.43445501 | 0.66  | 0.286 | 5.69E-82 | 25 | CYBA      | Immune/Monocytes, Neutrophils |
| 9.1208E-90 | 0.25518728 | 0.356 | 0.092 | 1.84E-85 | 25 | LAPTM5    | Immune/Monocytes, Neutrophils |
| 1.2092E-67 | 0.31597883 | 0.368 | 0.118 | 2.44E-63 | 25 | IER3      | Immune/Monocytes, Neutrophils |
| 1.4236E-79 | 0.27844854 | 0.394 | 0.118 | 2.88E-75 | 25 | HLA-DRB5  | Immune/Monocytes, Neutrophils |
| 4.018E-135 | 0.74436716 | 0.978 | 0.792 | 8.1E-131 | 25 | TMSB10    | Immune/Monocytes, Neutrophils |
| 1.0811E-69 | 0.2684897  | 0.334 | 0.099 | 2.18E-65 | 25 | LY96      | Immune/Monocytes, Neutrophils |
| 8.8298E-72 | 0.37040965 | 0.566 | 0.235 | 1.78E-67 | 25 | S100A11   | Immune/Monocytes, Neutrophils |
| 2.6337E-66 | 0.31743994 | 0.438 | 0.157 | 5.32E-62 | 25 | HLA-DRB1  | Immune/Monocytes, Neutrophils |
| 1.6855E-31 | 0.39953087 | 0.332 | 0.151 | 3.41E-27 | 25 | APOE      | Immune/Monocytes, Neutrophils |
| 3.027E-71  | 0.24172324 | 0.314 | 0.087 | 6.12E-67 | 25 | MAFB      | Immune/Monocytes, Neutrophils |
| 1.0128E-77 | 0.35946353 | 0.584 | 0.241 | 2.05E-73 | 25 | POMP      | Immune/Monocytes, Neutrophils |
| 2.3551E-72 | 0.21760148 | 0.276 | 0.069 | 4.76E-68 | 25 | CD163     | Immune/Monocytes, Neutrophils |
| 9.7129E-67 | 0.45084446 | 0.722 | 0.384 | 1.96E-62 | 25 | DUSP1     | Immune/Monocytes, Neutrophils |
| 1.6883E-68 | 0.3857     | 0.644 | 0.299 | 3.41E-64 | 25 | KLF6      | Immune/Monocytes, Neutrophils |
| 3.4697E-71 | 0.22885403 | 0.334 | 0.096 | 7.01E-67 | 25 | CMTM6     | Immune/Monocytes, Neutrophils |
| 1.8621E-68 | 0.52102892 | 0.882 | 0.58  | 3.76E-64 | 25 | FOS       | Immune/Monocytes, Neutrophils |

|            |            |       |       |          |    |          |                               |
|------------|------------|-------|-------|----------|----|----------|-------------------------------|
| 1.8546E-63 | 0.22192373 | 0.3   | 0.085 | 3.75E-59 | 25 | S100A9   | Immune/Monocytes, Neutrophils |
| 1.7913E-54 | 0.29954432 | 0.4   | 0.154 | 3.62E-50 | 25 | PRDX1    | Immune/Monocytes, Neutrophils |
| 6.9658E-66 | 0.24150794 | 0.35  | 0.109 | 1.41E-61 | 25 | FYB      | Immune/Monocytes, Neutrophils |
| 8.6082E-68 | 0.20055606 | 0.278 | 0.072 | 1.74E-63 | 25 | HLA-DQA1 | Immune/Monocytes, Neutrophils |
| 2.1616E-41 | 0.22635412 | 0.214 | 0.063 | 4.37E-37 | 25 | S100A8   | Immune/Monocytes, Neutrophils |
| 4.2404E-60 | 0.30968877 | 0.494 | 0.2   | 8.57E-56 | 25 | GPX1     | Immune/Monocytes, Neutrophils |
| 5.5417E-68 | 0.30190632 | 0.554 | 0.227 | 1.12E-63 | 25 | OAZ1     | Immune/Monocytes, Neutrophils |
| 5.054E-57  | 0.21413473 | 0.282 | 0.083 | 1.02E-52 | 25 | CTSC     | Immune/Monocytes, Neutrophils |
| 4.1289E-55 | 0.20220197 | 0.248 | 0.069 | 8.34E-51 | 25 | CTSL     | Immune/Monocytes, Neutrophils |
| 7.8348E-50 | 0.3390815  | 0.574 | 0.276 | 1.58E-45 | 25 | LGALS1   | Immune/Monocytes, Neutrophils |
| 3.6403E-44 | 0.26189893 | 0.334 | 0.127 | 7.36E-40 | 25 | SGK1     | Immune/Monocytes, Neutrophils |
| 6.314E-105 | 0.65315216 | 0.994 | 0.955 | 1.3E-100 | 25 | B2M      | Immune/Monocytes, Neutrophils |
| 8.6966E-41 | 0.33946383 | 0.492 | 0.246 | 1.76E-36 | 25 | HSPA1A   | Immune/Monocytes, Neutrophils |
| 1.3021E-49 | 0.31806934 | 0.546 | 0.26  | 2.63E-45 | 25 | ZFP36    | Immune/Monocytes, Neutrophils |
| 3.9526E-36 | 0.2013971  | 0.196 | 0.06  | 7.99E-32 | 25 | CXCL3    | Immune/Monocytes, Neutrophils |
| 7.4789E-52 | 0.20235233 | 0.286 | 0.09  | 1.51E-47 | 25 | IRF1     | Immune/Monocytes, Neutrophils |
| 2.4322E-54 | 0.22864589 | 0.378 | 0.137 | 4.91E-50 | 25 | SDCBP    | Immune/Monocytes, Neutrophils |
| 3.092E-49  | 0.28944763 | 0.514 | 0.237 | 6.25E-45 | 25 | SH3BGRL3 | Immune/Monocytes, Neutrophils |
| 4.2061E-50 | 0.23060463 | 0.358 | 0.132 | 8.5E-46  | 25 | VAMP8    | Immune/Monocytes, Neutrophils |
| 9.925E-48  | 0.20045641 | 0.282 | 0.093 | 2.01E-43 | 25 | LITAF    | Immune/Monocytes, Neutrophils |
| 1.4892E-39 | 0.21836058 | 0.294 | 0.108 | 3.01E-35 | 25 | RNASE1   | Immune/Monocytes, Neutrophils |
| 7.7599E-30 | 0.20253868 | 0.192 | 0.066 | 1.57E-25 | 25 | FN1      | Immune/Monocytes, Neutrophils |
| 1.9926E-25 | 0.25166666 | 0.254 | 0.109 | 4.03E-21 | 25 | CCL4     | Immune/Monocytes, Neutrophils |
| 7.4535E-47 | 0.26878449 | 0.524 | 0.248 | 1.51E-42 | 25 | HLA-A    | Immune/Monocytes, Neutrophils |
| 4.5967E-41 | 0.30023379 | 0.626 | 0.356 | 9.29E-37 | 25 | HLA-B    | Immune/Monocytes, Neutrophils |
| 5.0366E-38 | 0.24600112 | 0.51  | 0.253 | 1.02E-33 | 25 | VIM      | Immune/Monocytes, Neutrophils |
| 2.6707E-58 | 0.44239591 | 0.976 | 0.886 | 5.4E-54  | 25 | TMSB4X   | Immune/Monocytes, Neutrophils |
| 3.9021E-33 | 0.22349212 | 0.418 | 0.207 | 7.89E-29 | 25 | YBX1     | Immune/Monocytes, Neutrophils |
| 1.7776E-30 | 0.21839698 | 0.416 | 0.209 | 3.59E-26 | 25 | CD63     | Immune/Monocytes, Neutrophils |
| 2.3138E-34 | 0.23125509 | 0.54  | 0.289 | 4.68E-30 | 25 | PFN1     | Immune/Monocytes, Neutrophils |
| 1.8875E-31 | 0.34121381 | 0.866 | 0.691 | 3.81E-27 | 25 | NEAT1    | Immune/Monocytes, Neutrophils |
| 5.4206E-33 | 0.20635207 | 0.444 | 0.22  | 1.1E-28  | 25 | HLA-C    | Immune/Monocytes, Neutrophils |
| 9.603E-27  | 0.21904332 | 0.444 | 0.235 | 1.94E-22 | 25 | IFITM3   | Immune/Monocytes, Neutrophils |
| 1.3472E-31 | 0.20532149 | 0.428 | 0.214 | 2.72E-27 | 25 | CFL1     | Immune/Monocytes, Neutrophils |
| 3.2527E-17 | 0.20884338 | 0.45  | 0.279 | 6.57E-13 | 25 | HSPA1B   | Immune/Monocytes, Neutrophils |
| 2.1198E-23 | 0.23351458 | 0.768 | 0.573 | 4.28E-19 | 25 | ATP5E    | Immune/Monocytes, Neutrophils |
| 1.808E-21  | 0.20495525 | 0.682 | 0.462 | 3.65E-17 | 25 | HSP90AA1 | Immune/Monocytes, Neutrophils |
| 1.4084E-15 | -0.2855769 | 0.038 | 0.171 | 2.85E-11 | 25 | WFDC2    | Immune/Monocytes, Neutrophils |
| 2.7257E-16 | -0.2677288 | 0.046 | 0.19  | 5.51E-12 | 25 | CLU      | Immune/Monocytes, Neutrophils |
| 6.6437E-14 | -0.2869951 | 0.048 | 0.171 | 1.34E-09 | 25 | DEFB1    | Immune/Monocytes, Neutrophils |
| 2.5503E-16 | -0.2674278 | 0.066 | 0.212 | 5.15E-12 | 25 | FXD2     | Immune/Monocytes, Neutrophils |
| 1.1858E-07 | -0.2548827 | 0.036 | 0.108 | 0.002396 | 25 | IGFBP5   | Immune/Monocytes, Neutrophils |
| 2.5027E-13 | -0.2154153 | 0.108 | 0.246 | 5.06E-09 | 25 | IGFBP7   | Immune/Monocytes, Neutrophils |
| 1.0402E-15 | -0.322088  | 0.076 | 0.223 | 2.1E-11  | 25 | ADIRF    | Immune/Monocytes, Neutrophils |
| 2.4138E-16 | -0.3399188 | 0.084 | 0.232 | 4.88E-12 | 25 | ATP1B1   | Immune/Monocytes, Neutrophils |
| 4.1127E-11 | -0.2163468 | 0.36  | 0.472 | 8.31E-07 | 25 | RPL3     | Immune/Monocytes, Neutrophils |
| 0.00364302 | -0.2242212 | 0.146 | 0.189 | 1        | 25 | MT1X     | Immune/Monocytes, Neutrophils |
| 1.8184E-12 | -0.2136612 | 0.71  | 0.795 | 3.67E-08 | 25 | RPL13A   | Immune/Monocytes, Neutrophils |

|            |            |       |       |          |    |          |                               |
|------------|------------|-------|-------|----------|----|----------|-------------------------------|
| 2.1281E-13 | -0.2488124 | 0.498 | 0.596 | 4.3E-09  | 25 | RPS6     | Immune/Monocytes, Neutrophils |
| 7.2256E-15 | -0.2521068 | 0.73  | 0.814 | 1.46E-10 | 25 | RPS18    | Immune/Monocytes, Neutrophils |
| 4.8538E-19 | -0.2658632 | 0.614 | 0.713 | 9.81E-15 | 25 | RPS14    | Immune/Monocytes, Neutrophils |
| 4.2481E-14 | -0.2322549 | 0.942 | 0.946 | 8.58E-10 | 25 | RPS27    | Immune/Monocytes, Neutrophils |
| 8.0785E-16 | -0.238959  | 0.934 | 0.947 | 1.63E-11 | 25 | RPL34    | Immune/Monocytes, Neutrophils |
| 1.6368E-14 | -0.2745209 | 0.942 | 0.952 | 3.31E-10 | 25 | MT-ND1   | Immune/Monocytes, Neutrophils |
| 1.571E-07  | -0.5258702 | 0.126 | 0.217 | 0.003175 | 25 | MT1G     | Immune/Monocytes, Neutrophils |
| 5.8265E-24 | -0.3446852 | 0.83  | 0.887 | 1.18E-19 | 25 | MT-ND5   | Immune/Monocytes, Neutrophils |
| 1.6036E-25 | -0.3313028 | 1     | 0.997 | 3.24E-21 | 25 | MALAT1   | Immune/Monocytes, Neutrophils |
| 8.5169E-26 | -0.4218736 | 0.676 | 0.794 | 1.72E-21 | 25 | MT-ND4L  | Immune/Monocytes, Neutrophils |
| 0.00021356 | -1.4067733 | 0.112 | 0.168 | 1        | 25 | IGKC     | Immune/Monocytes, Neutrophils |
| 0          | 2.32690924 | 1     | 0.26  | 0        | 26 | SPP1     | Immune                        |
| 3.055E-177 | 0.76259737 | 0.437 | 0.078 | 6.2E-173 | 26 | APOC1    | Immune                        |
| 4.751E-170 | 0.22497632 | 0.175 | 0.014 | 9.6E-166 | 26 | VMO1     | Immune                        |
| 1.1819E-97 | 0.78009214 | 0.481 | 0.15  | 2.39E-93 | 26 | APOE     | Immune                        |
| 1.488E-140 | 0.58998956 | 0.494 | 0.12  | 3E-136   | 26 | CTSB     | Immune                        |
| 8.619E-115 | 0.51541864 | 0.364 | 0.079 | 1.7E-110 | 26 | FABP5    | Immune                        |
| 1.1922E-92 | 0.58694726 | 0.39  | 0.103 | 2.41E-88 | 26 | C1QB     | Immune                        |
| 6.9468E-93 | 0.59675852 | 0.428 | 0.121 | 1.4E-88  | 26 | C1QA     | Immune                        |
| 9.898E-115 | 0.3285699  | 0.271 | 0.045 | 2E-110   | 26 | C15orf48 | Immune                        |
| 7.6833E-86 | 0.56720144 | 0.519 | 0.181 | 1.55E-81 | 26 | TYROBP   | Immune                        |
| 1.3349E-92 | 0.31938542 | 0.273 | 0.054 | 2.7E-88  | 26 | MSR1     | Immune                        |
| 2.8616E-90 | 0.56610615 | 0.557 | 0.201 | 5.78E-86 | 26 | CTSD     | Immune                        |
| 8.2845E-98 | 0.32578243 | 0.319 | 0.068 | 1.67E-93 | 26 | CTSL     | Immune                        |
| 8.1871E-47 | 0.45344687 | 0.246 | 0.073 | 1.65E-42 | 26 | CCL2     | Immune                        |
| 5.4161E-57 | 0.3938122  | 0.268 | 0.072 | 1.09E-52 | 26 | CXCL8    | Immune                        |
| 7.3929E-78 | 1.08195521 | 0.938 | 0.701 | 1.49E-73 | 26 | FTL      | Immune                        |
| 3.8743E-67 | 0.34927415 | 0.266 | 0.065 | 7.83E-63 | 26 | FN1      | Immune                        |
| 1.4456E-80 | 0.43069993 | 0.457 | 0.145 | 2.92E-76 | 26 | FCER1G   | Immune                        |
| 6.9637E-63 | 0.38283359 | 0.348 | 0.108 | 1.41E-58 | 26 | RNASE1   | Immune                        |
| 9.68E-59   | 0.57253094 | 0.57  | 0.276 | 1.96E-54 | 26 | LGALS1   | Immune                        |
| 1.0519E-52 | 0.62510018 | 0.612 | 0.326 | 2.13E-48 | 26 | HLA-DRA  | Immune                        |
| 9.4164E-66 | 0.23977292 | 0.213 | 0.045 | 1.9E-61  | 26 | PLIN2    | Immune                        |
| 6.1182E-75 | 0.23217536 | 0.257 | 0.056 | 1.24E-70 | 26 | C1QC     | Immune                        |
| 1.7752E-63 | 0.41968806 | 0.503 | 0.205 | 3.59E-59 | 26 | NPC2     | Immune                        |
| 2.1522E-68 | 0.27420034 | 0.322 | 0.087 | 4.35E-64 | 26 | CTSZ     | Immune                        |
| 5.5782E-73 | 0.27378703 | 0.339 | 0.093 | 1.13E-68 | 26 | LAPTM5   | Immune                        |
| 8.1586E-69 | 0.23443109 | 0.268 | 0.064 | 1.65E-64 | 26 | LIPA     | Immune                        |
| 5.5177E-57 | 0.35420041 | 0.404 | 0.146 | 1.12E-52 | 26 | GLUL     | Immune                        |
| 3.3582E-64 | 0.2274853  | 0.246 | 0.058 | 6.79E-60 | 26 | CD14     | Immune                        |
| 3.9186E-52 | 0.25153603 | 0.257 | 0.072 | 7.92E-48 | 26 | LGMN     | Immune                        |
| 4.6224E-46 | 0.23693033 | 0.226 | 0.062 | 9.34E-42 | 26 | HMOX1    | Immune                        |
| 2.3017E-51 | 0.35976952 | 0.483 | 0.208 | 4.65E-47 | 26 | PSAP     | Immune                        |
| 5.6858E-56 | 0.22855941 | 0.29  | 0.084 | 1.15E-51 | 26 | GRN      | Immune                        |
| 1.3834E-34 | 0.47057942 | 0.579 | 0.356 | 2.8E-30  | 26 | CD74     | Immune                        |
| 8.9767E-46 | 0.33137931 | 0.457 | 0.201 | 1.81E-41 | 26 | GPX1     | Immune                        |
| 1.378E-41  | 0.20183746 | 0.22  | 0.064 | 2.78E-37 | 26 | ALOX5AP  | Immune                        |
| 7.8641E-29 | 0.52866983 | 0.705 | 0.566 | 1.59E-24 | 26 | FTH1     | Immune                        |

|            |            |       |       |          |    |          |         |
|------------|------------|-------|-------|----------|----|----------|---------|
| 2.1969E-28 | 0.28886064 | 0.31  | 0.138 | 4.44E-24 | 26 | TIMP1    | Immune  |
| 1.0824E-27 | 0.20025807 | 0.184 | 0.061 | 2.19E-23 | 26 | CXCL3    | Immune  |
| 3.7604E-36 | 0.26207444 | 0.426 | 0.19  | 7.6E-32  | 26 | AIF1     | Immune  |
| 3.3449E-29 | 0.49032285 | 0.756 | 0.656 | 6.76E-25 | 26 | ACTB     | Immune  |
| 2.6374E-25 | 0.31101649 | 0.494 | 0.29  | 5.33E-21 | 26 | SRGN     | Immune  |
| 2.9776E-29 | 0.27796416 | 0.446 | 0.236 | 6.02E-25 | 26 | S100A11  | Immune  |
| 3.4607E-27 | 0.27072235 | 0.45  | 0.249 | 6.99E-23 | 26 | HLA-A    | Immune  |
| 8.4128E-29 | 0.24013533 | 0.412 | 0.209 | 1.7E-24  | 26 | CD63     | Immune  |
| 5.3226E-36 | 0.38384536 | 0.949 | 0.792 | 1.08E-31 | 26 | TMSB10   | Immune  |
| 1.8663E-22 | 0.24965773 | 0.441 | 0.253 | 3.77E-18 | 26 | VIM      | Immune  |
| 2.1144E-22 | 0.23694025 | 0.421 | 0.238 | 4.27E-18 | 26 | SH3BGRL3 | Immune  |
| 2.2423E-19 | 0.22877155 | 0.408 | 0.244 | 4.53E-15 | 26 | GAPDH    | Immune  |
| 5.2642E-17 | 0.24581373 | 0.443 | 0.289 | 1.06E-12 | 26 | CYBA     | Immune  |
| 3.7745E-17 | 0.20324301 | 0.443 | 0.275 | 7.63E-13 | 26 | CST3     | Immune  |
| 1.6771E-18 | 0.2125284  | 0.608 | 0.415 | 3.39E-14 | 26 | SAT1     | Immune  |
| 5.8476E-05 | 0.29089516 | 0.993 | 0.955 | 1        | 26 | B2M      | Immune  |
| 1.3909E-10 | 0.22781679 | 0.958 | 0.952 | 2.81E-06 | 26 | MT-ND1   | Immune  |
| 0.00015801 | 0.20997732 | 0.847 | 0.792 | 1        | 26 | MT-ND4L  | Immune  |
| 1.1364E-08 | 0.20246374 | 0.973 | 0.886 | 0.00023  | 26 | TMSB4X   | Immune  |
| 0.00054377 | -0.2020358 | 0.058 | 0.108 | 1        | 26 | IGFBP5   | Immune  |
| 4.2462E-07 | -0.2250691 | 0.122 | 0.223 | 0.008581 | 26 | ADIRF    | Immune  |
| 1.4843E-12 | -0.2095683 | 0.266 | 0.426 | 3E-08    | 26 | RPS3     | Immune  |
| 2.722E-14  | -0.2299384 | 0.284 | 0.451 | 5.5E-10  | 26 | RPS4X    | Immune  |
| 2.0615E-15 | -0.244434  | 0.288 | 0.472 | 4.17E-11 | 26 | RPL3     | Immune  |
| 3.9137E-12 | -0.2161876 | 0.353 | 0.496 | 7.91E-08 | 26 | RPL7     | Immune  |
| 5.5659E-13 | -0.2323578 | 0.399 | 0.549 | 1.12E-08 | 26 | RPL11    | Immune  |
| 3.9503E-12 | -0.2263392 | 0.41  | 0.549 | 7.98E-08 | 26 | RPL23A   | Immune  |
| 2.0528E-15 | -0.2450263 | 0.415 | 0.587 | 4.15E-11 | 26 | RPL26    | Immune  |
| 1.4384E-13 | -0.2449522 | 0.384 | 0.531 | 2.91E-09 | 26 | RPS3A    | Immune  |
| 1.2346E-14 | -0.2308725 | 0.519 | 0.67  | 2.49E-10 | 26 | RPS28    | Immune  |
| 1.0481E-17 | -0.2766868 | 0.373 | 0.558 | 2.12E-13 | 26 | RPL18A   | Immune  |
| 2.1831E-11 | -0.2287371 | 0.599 | 0.694 | 4.41E-07 | 26 | RPS8     | Immune  |
| 3.7253E-21 | -0.3018373 | 0.392 | 0.597 | 7.53E-17 | 26 | RPS6     | Immune  |
| 2.4746E-14 | -0.2076977 | 0.84  | 0.873 | 5E-10    | 26 | RPL41    | Immune  |
| 1.55E-11   | -0.2322788 | 0.687 | 0.765 | 3.13E-07 | 26 | RPL32    | Immune  |
| 5.5885E-15 | -0.2773422 | 0.455 | 0.602 | 1.13E-10 | 26 | RPS15A   | Immune  |
| 2.4231E-09 | -0.2209849 | 0.874 | 0.871 | 4.9E-05  | 26 | RPL39    | Immune  |
| 1.1041E-13 | -0.2512491 | 0.745 | 0.814 | 2.23E-09 | 26 | RPS18    | Immune  |
| 1.1232E-19 | -0.2723011 | 0.692 | 0.795 | 2.27E-15 | 26 | RPL13A   | Immune  |
| 5.9426E-23 | -0.3002642 | 0.641 | 0.772 | 1.2E-18  | 26 | RPS27A   | Immune  |
| 7.9765E-22 | -0.3198876 | 0.685 | 0.786 | 1.61E-17 | 26 | RPL10    | Immune  |
| 4.4778E-28 | -0.3479303 | 0.84  | 0.908 | 9.05E-24 | 26 | RPL21    | Immune  |
| 2.4312E-33 | -0.3725912 | 0.9   | 0.947 | 4.91E-29 | 26 | RPS27    | Immune  |
| 3.5017E-43 | -0.428669  | 0.896 | 0.948 | 7.08E-39 | 26 | RPL34    | Immune  |
| 8.9557E-64 | -0.5740659 | 1     | 0.997 | 1.81E-59 | 26 | MALAT1   | Immune  |
| 0.00163185 | -1.4031341 | 0.115 | 0.168 | 1        | 26 | IGKC     | Immune  |
| 0          | 1.24083568 | 0.995 | 0.007 | 0        | 27 | CXCL13   | T cells |
| 8.396E-142 | 0.30599579 | 0.27  | 0.036 | 1.7E-137 | 27 | IFNG     | T cells |

|            |            |       |       |          |    |          |         |
|------------|------------|-------|-------|----------|----|----------|---------|
| 2.0916E-91 | 0.51300625 | 0.5   | 0.154 | 4.23E-87 | 27 | CCL5     | T cells |
| 4.545E-100 | 0.20451444 | 0.221 | 0.033 | 9.18E-96 | 27 | DUSP4    | T cells |
| 8.408E-84  | 0.2208771  | 0.203 | 0.033 | 1.7E-79  | 27 | GZMB     | T cells |
| 1.13E-103  | 0.27033414 | 0.332 | 0.067 | 2.3E-99  | 27 | CD2      | T cells |
| 1.0083E-93 | 0.28219771 | 0.346 | 0.078 | 2.04E-89 | 27 | CD3D     | T cells |
| 5.3821E-81 | 0.37114366 | 0.479 | 0.15  | 1.09E-76 | 27 | RGS1     | T cells |
| 4.1372E-79 | 0.34875935 | 0.486 | 0.156 | 8.36E-75 | 27 | CD52     | T cells |
| 3.2578E-61 | 0.25371113 | 0.295 | 0.08  | 6.58E-57 | 27 | PRDM1    | T cells |
| 7.6264E-56 | 0.35457356 | 0.465 | 0.178 | 1.54E-51 | 27 | IL32     | T cells |
| 3.5575E-58 | 0.23399381 | 0.256 | 0.065 | 7.19E-54 | 27 | ITM2A    | T cells |
| 3.0151E-49 | 0.20160073 | 0.242 | 0.065 | 6.09E-45 | 27 | NKG7     | T cells |
| 1.1211E-54 | 0.24939654 | 0.387 | 0.132 | 2.27E-50 | 27 | PTPRC    | T cells |
| 3.5859E-43 | 0.24091077 | 0.355 | 0.13  | 7.25E-39 | 27 | CD69     | T cells |
| 2.7392E-40 | 0.28191175 | 0.482 | 0.214 | 5.54E-36 | 27 | CXCR4    | T cells |
| 2.9943E-28 | 0.25825544 | 0.532 | 0.29  | 6.05E-24 | 27 | SRGN     | T cells |
| 1.5854E-25 | 0.27573859 | 0.495 | 0.29  | 3.2E-21  | 27 | PFN1     | T cells |
| 1.2646E-59 | 0.42523786 | 0.998 | 0.955 | 2.56E-55 | 27 | B2M      | T cells |
| 2.4943E-28 | 0.30130616 | 0.71  | 0.492 | 5.04E-24 | 27 | RPS26    | T cells |
| 9.2454E-25 | 0.22418515 | 0.447 | 0.237 | 1.87E-20 | 27 | SH3BGRL3 | T cells |
| 7.9915E-20 | 0.28124479 | 0.862 | 0.802 | 1.61E-15 | 27 | RPLP1    | T cells |
| 5.3081E-15 | 0.21287818 | 0.753 | 0.599 | 1.07E-10 | 27 | RPS15A   | T cells |
| 1.6335E-16 | 0.22443098 | 0.906 | 0.871 | 3.3E-12  | 27 | RPL39    | T cells |
| 4.7663E-15 | 0.20795123 | 0.853 | 0.794 | 9.63E-11 | 27 | RPL13A   | T cells |
| 1.3881E-19 | 0.20340322 | 0.963 | 0.886 | 2.81E-15 | 27 | TMSB4X   | T cells |
| 1.2403E-11 | -0.2246858 | 0.021 | 0.13  | 2.51E-07 | 27 | CXCL2    | T cells |
| 1.1402E-16 | -0.2226951 | 0.048 | 0.209 | 2.3E-12  | 27 | NPC2     | T cells |
| 7.9613E-12 | -0.2080316 | 0.039 | 0.156 | 1.61E-07 | 27 | HES1     | T cells |
| 1.3088E-15 | -0.2472071 | 0.041 | 0.194 | 2.64E-11 | 27 | AIF1     | T cells |
| 1.118E-16  | -0.3281102 | 0.035 | 0.19  | 2.26E-12 | 27 | CLU      | T cells |
| 2.3153E-14 | -0.2969767 | 0.035 | 0.171 | 4.68E-10 | 27 | WFDC2    | T cells |
| 2.0665E-19 | -0.2625255 | 0.058 | 0.239 | 4.18E-15 | 27 | IFITM3   | T cells |
| 4.8958E-15 | -0.2306215 | 0.06  | 0.212 | 9.89E-11 | 27 | PSAP     | T cells |
| 5.483E-08  | -0.2608727 | 0.028 | 0.108 | 0.001108 | 27 | IGFBP5   | T cells |
| 8.5689E-20 | -0.2883115 | 0.058 | 0.246 | 1.73E-15 | 27 | IGFBP7   | T cells |
| 1.0458E-12 | -0.2315566 | 0.055 | 0.186 | 2.11E-08 | 27 | TYROBP   | T cells |
| 1.2209E-12 | -0.2756053 | 0.044 | 0.171 | 2.47E-08 | 27 | DEFB1    | T cells |
| 5.9419E-22 | -0.3012473 | 0.074 | 0.279 | 1.2E-17  | 27 | CST3     | T cells |
| 1.5393E-09 | -0.202264  | 0.092 | 0.205 | 3.11E-05 | 27 | CTSD     | T cells |
| 9.2608E-08 | -0.2495865 | 0.053 | 0.141 | 0.001871 | 27 | TIMP1    | T cells |
| 1.6543E-09 | -0.2824191 | 0.051 | 0.153 | 3.34E-05 | 27 | LYZ      | T cells |
| 3.9053E-17 | -0.3673409 | 0.058 | 0.223 | 7.89E-13 | 27 | ADIRF    | T cells |
| 4.7896E-18 | -0.2850106 | 0.097 | 0.28  | 9.68E-14 | 27 | EGR1     | T cells |
| 1.5242E-11 | -0.2468981 | 0.085 | 0.212 | 3.08E-07 | 27 | FXSD2    | T cells |
| 8.387E-17  | -0.3443199 | 0.067 | 0.232 | 1.69E-12 | 27 | ATP1B1   | T cells |
| 1.9781E-06 | -0.2229309 | 0.074 | 0.153 | 0.039974 | 27 | APOE     | T cells |
| 1.9805E-06 | -0.2253822 | 0.184 | 0.28  | 0.040022 | 27 | LGALS1   | T cells |
| 8.9945E-16 | -0.2747477 | 0.24  | 0.414 | 1.82E-11 | 27 | ITM2B    | T cells |
| 9.3047E-07 | -0.2105198 | 0.599 | 0.694 | 0.018803 | 27 | NEAT1    | T cells |

|            |            |       |       |          |    |          |         |
|------------|------------|-------|-------|----------|----|----------|---------|
| 6.5654E-18 | -0.5372221 | 0.092 | 0.268 | 1.33E-13 | 27 | SPP1     | T cells |
| 0.00699982 | -0.2391496 | 0.147 | 0.189 | 1        | 27 | MT1X     | T cells |
| 1.8647E-17 | -0.3560165 | 0.237 | 0.418 | 3.77E-13 | 27 | SAT1     | T cells |
| 1.6646E-06 | -0.2207762 | 0.947 | 0.952 | 0.033638 | 27 | MT-ND1   | T cells |
| 1.6654E-09 | -0.3176425 | 0.249 | 0.359 | 3.37E-05 | 27 | CD74     | T cells |
| 0.00173589 | -0.2221259 | 0.797 | 0.793 | 1        | 27 | MT-ND4L  | T cells |
| 9.5156E-15 | -0.3811603 | 0.311 | 0.456 | 1.92E-10 | 27 | S100A6   | T cells |
| 3.7189E-12 | -0.5133211 | 0.2   | 0.33  | 7.52E-08 | 27 | HLA-DRA  | T cells |
| 2.0188E-22 | -0.4745358 | 0.382 | 0.569 | 4.08E-18 | 27 | FTH1     | T cells |
| 1.0096E-23 | -0.5250288 | 0.401 | 0.585 | 2.04E-19 | 27 | FOS      | T cells |
| 0.0021628  | -0.5163632 | 0.166 | 0.217 | 1        | 27 | MT1G     | T cells |
| 1.9621E-12 | -0.6592319 | 0.599 | 0.704 | 3.96E-08 | 27 | FTL      | T cells |
| 0          | 1.57752065 | 0.242 | 0.002 | 0        | 28 | IGHA2    | B cells |
| 0          | 3.74010364 | 0.871 | 0.03  | 0        | 28 | IGHA1    | B cells |
| 0          | 2.53346635 | 0.548 | 0.033 | 0        | 28 | JCHAIN   | B cells |
| 1.705E-156 | 2.02281529 | 0.158 | 0.012 | 3.4E-152 | 28 | IGHM     | B cells |
| 6.2518E-57 | 1.8299275  | 0.24  | 0.06  | 1.26E-52 | 28 | IGLC3    | B cells |
| 3.2683E-47 | 1.93075625 | 0.264 | 0.081 | 6.6E-43  | 28 | IGLC2    | B cells |
| 1.0692E-87 | 1.96627334 | 0.482 | 0.165 | 2.16E-83 | 28 | IGKC     | B cells |
| 0          | 0.45820039 | 0.348 | 0.028 | 0        | 28 | MZB1     | B cells |
| 1.093E-300 | 0.20130911 | 0.195 | 0.009 | 2.2E-296 | 28 | TNFRSF17 | B cells |
| 4.625E-100 | 0.56680668 | 0.504 | 0.155 | 9.35E-96 | 28 | SSR4     | B cells |
| 9.721E-128 | 0.2217193  | 0.238 | 0.031 | 2E-123   | 28 | FKBP11   | B cells |
| 4.3128E-71 | 0.32161522 | 0.304 | 0.076 | 8.72E-67 | 28 | XBP1     | B cells |
| 1.5032E-12 | -0.2184608 | 0.125 | 0.278 | 3.04E-08 | 28 | CST3     | B cells |
| 2.2139E-06 | -0.2148434 | 0.071 | 0.153 | 0.044739 | 28 | LYZ      | B cells |
| 1.2511E-12 | -0.2000455 | 0.198 | 0.362 | 2.53E-08 | 28 | CALM2    | B cells |
| 1.8778E-06 | -0.2257736 | 0.127 | 0.223 | 0.037947 | 28 | ADIRF    | B cells |
| 8.6018E-05 | -0.2160529 | 0.118 | 0.189 | 1        | 28 | MT1X     | B cells |
| 2.3389E-17 | -0.2677641 | 0.212 | 0.414 | 4.73E-13 | 28 | ITM2B    | B cells |
| 5.9127E-09 | -0.2093075 | 0.278 | 0.417 | 0.000119 | 28 | SAT1     | B cells |
| 2.7942E-16 | -0.308095  | 0.247 | 0.457 | 5.65E-12 | 28 | S100A6   | B cells |
| 7.1329E-14 | -0.2099174 | 0.595 | 0.738 | 1.44E-09 | 28 | EEF1A1   | B cells |
| 6.3826E-10 | -0.2725839 | 0.224 | 0.36  | 1.29E-05 | 28 | CD74     | B cells |
| 0.00826011 | -0.2583383 | 0.214 | 0.267 | 1        | 28 | SPP1     | B cells |
| 3.0783E-09 | -0.3320602 | 0.224 | 0.358 | 6.22E-05 | 28 | MT2A     | B cells |
| 8.6832E-13 | -0.4125402 | 0.172 | 0.33  | 1.75E-08 | 28 | HLA-DRA  | B cells |
| 2.7778E-26 | -0.3830539 | 0.416 | 0.659 | 5.61E-22 | 28 | ACTB     | B cells |
| 0.00663345 | -0.3310778 | 0.167 | 0.217 | 1        | 28 | MT1G     | B cells |
| 4.7444E-23 | -0.4309928 | 0.344 | 0.569 | 9.59E-19 | 28 | FTH1     | B cells |
| 9.4288E-26 | -0.384042  | 0.633 | 0.795 | 1.91E-21 | 28 | TMSB10   | B cells |
| 5.0159E-21 | -0.3812146 | 0.795 | 0.887 | 1.01E-16 | 28 | TMSB4X   | B cells |
| 2.1459E-05 | -0.503561  | 0.682 | 0.703 | 0.433637 | 28 | FTL      | B cells |
| 0          | 1.25039304 | 0.998 | 0.073 | 0        | 29 | AREG     | T cells |
| 2.6577E-73 | 0.43892123 | 0.565 | 0.213 | 5.37E-69 | 29 | CXCR4    | T cells |
| 1.1036E-49 | 0.32782979 | 0.374 | 0.13  | 2.23E-45 | 29 | CD69     | T cells |
| 1.3372E-58 | 0.49125868 | 0.697 | 0.37  | 2.7E-54  | 29 | PABPC1   | T cells |
| 1.0837E-42 | 0.3156825  | 0.401 | 0.155 | 2.19E-38 | 29 | CCL5     | T cells |

|            |            |       |       |          |    |         |         |
|------------|------------|-------|-------|----------|----|---------|---------|
| 1.894E-28  | 0.28919469 | 0.501 | 0.272 | 3.83E-24 | 29 | BTG1    | T cells |
| 3.3681E-26 | 0.26307485 | 0.401 | 0.204 | 6.81E-22 | 29 | ZFP36L2 | T cells |
| 1.7088E-20 | 0.21943456 | 0.35  | 0.179 | 3.45E-16 | 29 | IL32    | T cells |
| 2.9462E-40 | 0.37466733 | 0.98  | 0.946 | 5.95E-36 | 29 | RPS27   | T cells |
| 5.246E-17  | 0.22937473 | 0.472 | 0.291 | 1.06E-12 | 29 | SRGN    | T cells |
| 2.1425E-30 | 0.32342001 | 0.956 | 0.907 | 4.33E-26 | 29 | RPL21   | T cells |
| 9.0171E-17 | 0.26318569 | 0.636 | 0.492 | 1.82E-12 | 29 | RPS26   | T cells |
| 4.5585E-19 | 0.25905113 | 0.748 | 0.592 | 9.21E-15 | 29 | RPL28   | T cells |
| 9.2596E-16 | 0.25247076 | 0.731 | 0.599 | 1.87E-11 | 29 | RPS15A  | T cells |
| 7.8604E-20 | 0.28213758 | 0.863 | 0.794 | 1.59E-15 | 29 | RPL13A  | T cells |
| 1.7943E-17 | 0.24938427 | 0.711 | 0.591 | 3.63E-13 | 29 | RPLP2   | T cells |
| 9.4788E-15 | 0.2331182  | 0.702 | 0.555 | 1.92E-10 | 29 | RPL18A  | T cells |
| 9.2468E-24 | 0.25363069 | 0.917 | 0.82  | 1.87E-19 | 29 | RPL13   | T cells |
| 3.0974E-21 | 0.26238676 | 0.905 | 0.849 | 6.26E-17 | 29 | RPS29   | T cells |
| 9.5426E-13 | 0.23160486 | 0.714 | 0.609 | 1.93E-08 | 29 | RPS12   | T cells |
| 1.8753E-10 | 0.20811809 | 0.545 | 0.431 | 3.79E-06 | 29 | H3F3B   | T cells |
| 1.2727E-31 | 0.25539614 | 1     | 0.997 | 2.57E-27 | 29 | MALAT1  | T cells |
| 1.887E-16  | 0.22849784 | 0.868 | 0.784 | 3.81E-12 | 29 | RPL10   | T cells |
| 1.5485E-23 | 0.24021899 | 0.993 | 0.955 | 3.13E-19 | 29 | B2M     | T cells |
| 9.4099E-14 | 0.22655377 | 0.839 | 0.764 | 1.9E-09  | 29 | RPL32   | T cells |
| 1.3709E-16 | 0.23864561 | 0.902 | 0.871 | 2.77E-12 | 29 | RPL39   | T cells |
| 2.7896E-10 | 0.20990784 | 0.653 | 0.562 | 5.64E-06 | 29 | RPS25   | T cells |
| 1.7525E-12 | -0.20549   | 0.029 | 0.156 | 3.54E-08 | 29 | HES1    | T cells |
| 1.4444E-08 | -0.2092474 | 0.02  | 0.105 | 0.000292 | 29 | CTGF    | T cells |
| 3.2041E-09 | -0.2725511 | 0.017 | 0.108 | 6.47E-05 | 29 | IGFBP5  | T cells |
| 1.4006E-14 | -0.2896903 | 0.027 | 0.171 | 2.83E-10 | 29 | DEFB1   | T cells |
| 4.3993E-14 | -0.3075098 | 0.032 | 0.171 | 8.89E-10 | 29 | WFDC2   | T cells |
| 6.4122E-15 | -0.3203507 | 0.039 | 0.189 | 1.3E-10  | 29 | CLU     | T cells |
| 1.4146E-12 | -0.2104501 | 0.068 | 0.212 | 2.86E-08 | 29 | PSAP    | T cells |
| 2.2694E-12 | -0.201579  | 0.071 | 0.21  | 4.59E-08 | 29 | HSPB1   | T cells |
| 8.0024E-15 | -0.22656   | 0.076 | 0.236 | 1.62E-10 | 29 | DSTN    | T cells |
| 2.0074E-18 | -0.2966938 | 0.061 | 0.246 | 4.06E-14 | 29 | IGFBP7  | T cells |
| 3.8782E-15 | -0.233806  | 0.076 | 0.239 | 7.84E-11 | 29 | IFITM3  | T cells |
| 8.0374E-18 | -0.3758402 | 0.046 | 0.223 | 1.62E-13 | 29 | ADIRF   | T cells |
| 4.3362E-13 | -0.2587623 | 0.068 | 0.212 | 8.76E-09 | 29 | FXD2    | T cells |
| 9.0753E-13 | -0.2287826 | 0.12  | 0.278 | 1.83E-08 | 29 | CST3    | T cells |
| 7.2317E-15 | -0.3276734 | 0.071 | 0.231 | 1.46E-10 | 29 | ATP1B1  | T cells |
| 3.8957E-05 | -0.2186153 | 0.071 | 0.141 | 0.787246 | 29 | TIMP1   | T cells |
| 2.4145E-05 | -0.2145219 | 0.081 | 0.153 | 0.487929 | 29 | APOE    | T cells |
| 2.9677E-08 | -0.2978632 | 0.086 | 0.19  | 0.0006   | 29 | MT1X    | T cells |
| 3.3516E-11 | -0.2290692 | 0.257 | 0.414 | 6.77E-07 | 29 | ITM2B   | T cells |
| 1.4397E-07 | -0.2658229 | 0.174 | 0.28  | 0.002909 | 29 | LGALS1  | T cells |
| 2.9549E-11 | -0.3019891 | 0.21  | 0.36  | 5.97E-07 | 29 | CD74    | T cells |
| 1.1837E-16 | -0.5275454 | 0.093 | 0.268 | 2.39E-12 | 29 | SPP1    | T cells |
| 1.0548E-21 | -0.4339406 | 0.237 | 0.457 | 2.13E-17 | 29 | S100A6  | T cells |
| 5.6313E-15 | -0.4489231 | 0.181 | 0.359 | 1.14E-10 | 29 | MT2A    | T cells |
| 1.8012E-10 | -0.2411312 | 0.936 | 0.952 | 3.64E-06 | 29 | MT-ND1  | T cells |
| 1.5174E-08 | -0.4008421 | 0.213 | 0.33  | 0.000307 | 29 | HLA-DRA | T cells |

|            |            |       |       |          |    |           |                    |
|------------|------------|-------|-------|----------|----|-----------|--------------------|
| 6.8427E-09 | -0.6081653 | 0.105 | 0.218 | 0.000138 | 29 | MT1G      | T cells            |
| 0          | 0.20575181 | 0.152 | 0.001 | 0        | 30 | SFRP2     | Proximal Tubule    |
| 0          | 1.43963173 | 0.912 | 0.067 | 0        | 30 | MMP7      | Proximal Tubule    |
| 1.351E-258 | 0.25042837 | 0.22  | 0.013 | 2.7E-254 | 30 | CDH6      | Proximal Tubule    |
| 1.284E-239 | 0.44440917 | 0.395 | 0.045 | 2.6E-235 | 30 | VCAM1     | Proximal Tubule    |
| 8.773E-190 | 0.5476543  | 0.505 | 0.09  | 1.8E-185 | 30 | TPM1      | Proximal Tubule    |
| 2.652E-122 | 0.31822196 | 0.355 | 0.063 | 5.4E-118 | 30 | PDZK1P1   | Proximal Tubule    |
| 5.5406E-68 | 0.66671866 | 0.578 | 0.242 | 1.12E-63 | 30 | IGFBP7    | Proximal Tubule    |
| 1.0329E-44 | 0.52385873 | 0.308 | 0.102 | 2.09E-40 | 30 | CTGF      | Proximal Tubule    |
| 6.702E-55  | 0.20743948 | 0.195 | 0.04  | 1.35E-50 | 30 | KRT19     | Proximal Tubule    |
| 6.1441E-60 | 0.25070458 | 0.315 | 0.085 | 1.24E-55 | 30 | SOX4      | Proximal Tubule    |
| 4.1322E-61 | 0.25531054 | 0.34  | 0.095 | 8.35E-57 | 30 | S100A13   | Proximal Tubule    |
| 3.4267E-59 | 0.24770351 | 0.335 | 0.092 | 6.92E-55 | 30 | CRYAB     | Proximal Tubule    |
| 1.4975E-52 | 0.2017515  | 0.242 | 0.06  | 3.03E-48 | 30 | NUPR1     | Proximal Tubule    |
| 3.8993E-32 | 0.37055079 | 0.71  | 0.453 | 7.88E-28 | 30 | S100A6    | Proximal Tubule    |
| 1.3725E-33 | 0.22167106 | 0.385 | 0.156 | 2.77E-29 | 30 | CD24      | Proximal Tubule    |
| 1.2685E-16 | 0.27840399 | 0.58  | 0.411 | 2.56E-12 | 30 | ITM2B     | Proximal Tubule    |
| 2.5421E-22 | 0.2061195  | 0.442 | 0.233 | 5.14E-18 | 30 | DSTN      | Proximal Tubule    |
| 2.5848E-15 | 0.23464169 | 0.848 | 0.736 | 5.22E-11 | 30 | EEF1A1    | Proximal Tubule    |
| 1.5511E-14 | -0.2109977 | 0.012 | 0.149 | 3.13E-10 | 30 | FCER1G    | Proximal Tubule    |
| 5.7755E-18 | -0.2719366 | 0.018 | 0.186 | 1.17E-13 | 30 | TYROBP    | Proximal Tubule    |
| 1.3063E-09 | -0.2020894 | 0.015 | 0.11  | 2.64E-05 | 30 | CCL3      | Proximal Tubule    |
| 4.8009E-14 | -0.3265242 | 0.018 | 0.153 | 9.7E-10  | 30 | LYZ       | Proximal Tubule    |
| 7.6912E-16 | -0.2678515 | 0.035 | 0.194 | 1.55E-11 | 30 | AIF1      | Proximal Tubule    |
| 6.618E-18  | -0.2602159 | 0.05  | 0.231 | 1.34E-13 | 30 | S100A4    | Proximal Tubule    |
| 8.5186E-08 | -0.2131036 | 0.038 | 0.124 | 0.001721 | 30 | C1QA      | Proximal Tubule    |
| 4.3811E-26 | -0.3546869 | 0.055 | 0.294 | 8.85E-22 | 30 | SRGN      | Proximal Tubule    |
| 4.2433E-13 | -0.2194116 | 0.07  | 0.217 | 8.57E-09 | 30 | CXCR4     | Proximal Tubule    |
| 6.4379E-14 | -0.2215486 | 0.11  | 0.275 | 1.3E-09  | 30 | BTG1      | Proximal Tubule    |
| 8.1719E-14 | -0.2322029 | 0.102 | 0.264 | 1.65E-09 | 30 | ZFP36     | Proximal Tubule    |
| 2.9864E-12 | -0.2000572 | 0.192 | 0.36  | 6.03E-08 | 30 | HLA-B     | Proximal Tubule    |
| 2.3918E-09 | -0.2227772 | 0.248 | 0.373 | 4.83E-05 | 30 | PABPC1    | Proximal Tubule    |
| 1.4874E-13 | -0.2884491 | 0.22  | 0.389 | 3.01E-09 | 30 | DUSP1     | Proximal Tubule    |
| 8.2081E-16 | -0.3623263 | 0.172 | 0.36  | 1.66E-11 | 30 | CD74      | Proximal Tubule    |
| 1.697E-23  | -0.6120914 | 0.102 | 0.331 | 3.43E-19 | 30 | HLA-DRA   | Proximal Tubule    |
| 1.55E-06   | -0.2145743 | 0.625 | 0.694 | 0.031323 | 30 | NEAT1     | Proximal Tubule    |
| 2.2486E-20 | -0.4854824 | 0.385 | 0.585 | 4.54E-16 | 30 | FOS       | Proximal Tubule    |
| 9.8372E-17 | -0.3818884 | 0.88  | 0.886 | 1.99E-12 | 30 | TMSB4X    | Proximal Tubule    |
| 4.7116E-49 | -0.6506022 | 0.92  | 0.955 | 9.52E-45 | 30 | B2M       | Proximal Tubule    |
| 2.2834E-21 | -0.8272331 | 0.565 | 0.704 | 4.61E-17 | 30 | FTL       | Proximal Tubule    |
| 2.9187E-05 | -1.4951883 | 0.092 | 0.168 | 0.589802 | 30 | IGKC      | Proximal Tubule    |
| 0          | 1.15149582 | 1     | 0.026 | 0        | 31 | STC1      | Immune/Neutrophils |
| 9.1144E-41 | 0.41733075 | 0.41  | 0.166 | 1.84E-36 | 31 | MTRNR2L12 | Immune/Neutrophils |
| 5.094E-79  | 0.64987445 | 0.98  | 0.792 | 1.03E-74 | 31 | MT-ND4L   | Immune/Neutrophils |
| 8.7582E-31 | 0.28841717 | 0.399 | 0.168 | 1.77E-26 | 31 | WFDC2     | Immune/Neutrophils |
| 7.7708E-27 | 0.28855435 | 0.376 | 0.169 | 1.57E-22 | 31 | DEFB1     | Immune/Neutrophils |
| 1.5631E-76 | 0.57232315 | 0.986 | 0.886 | 3.16E-72 | 31 | MT-ND5    | Immune/Neutrophils |
| 8.5527E-17 | 0.30037746 | 0.343 | 0.194 | 1.73E-12 | 31 | MT-ATP8   | Immune/Neutrophils |

|            |            |       |       |          |    |         |                    |
|------------|------------|-------|-------|----------|----|---------|--------------------|
| 6.6506E-66 | 0.49315668 | 1     | 0.952 | 1.34E-61 | 31 | MT-ND1  | Immune/Neutrophils |
| 2.243E-14  | 0.26536682 | 0.287 | 0.154 | 4.53E-10 | 31 | HES1    | Immune/Neutrophils |
| 4.4888E-33 | 0.28591591 | 1     | 0.989 | 9.07E-29 | 31 | MT-CYB  | Immune/Neutrophils |
| 1.8898E-07 | 0.20054604 | 0.298 | 0.208 | 0.003819 | 31 | HSPB1   | Immune/Neutrophils |
| 3.4725E-06 | 0.21063302 | 0.43  | 0.379 | 0.070172 | 31 | ATP5I   | Immune/Neutrophils |
| 3.7003E-12 | -0.2591785 | 0.003 | 0.125 | 7.48E-08 | 31 | C1QA    | Immune/Neutrophils |
| 1.0317E-11 | -0.2445154 | 0.008 | 0.13  | 2.08E-07 | 31 | CXCL2   | Immune/Neutrophils |
| 2.4595E-09 | -0.2127358 | 0.011 | 0.11  | 4.97E-05 | 31 | CCL3    | Immune/Neutrophils |
| 6.0943E-20 | -0.2816907 | 0.017 | 0.218 | 1.23E-15 | 31 | CXCR4   | Immune/Neutrophils |
| 2.5576E-12 | -0.2144267 | 0.02  | 0.154 | 5.17E-08 | 31 | RGS1    | Immune/Neutrophils |
| 4.1252E-13 | -0.3284518 | 0.014 | 0.153 | 8.34E-09 | 31 | LYZ     | Immune/Neutrophils |
| 3.156E-12  | -0.2295432 | 0.022 | 0.158 | 6.38E-08 | 31 | CCL5    | Immune/Neutrophils |
| 2.2882E-14 | -0.2553156 | 0.028 | 0.186 | 4.62E-10 | 31 | TYROBP  | Immune/Neutrophils |
| 9.3706E-15 | -0.2676984 | 0.031 | 0.194 | 1.89E-10 | 31 | AIF1    | Immune/Neutrophils |
| 2.4098E-22 | -0.3264769 | 0.053 | 0.294 | 4.87E-18 | 31 | SRGN    | Immune/Neutrophils |
| 2.3727E-12 | -0.2113604 | 0.07  | 0.231 | 4.79E-08 | 31 | S100A4  | Immune/Neutrophils |
| 4.5808E-16 | -0.2231496 | 0.084 | 0.291 | 9.26E-12 | 31 | CYBA    | Immune/Neutrophils |
| 5.2114E-13 | -0.2046127 | 0.084 | 0.256 | 1.05E-08 | 31 | VIM     | Immune/Neutrophils |
| 3.5473E-15 | -0.2459259 | 0.079 | 0.264 | 7.17E-11 | 31 | ZFP36   | Immune/Neutrophils |
| 5.3633E-14 | -0.2287266 | 0.096 | 0.275 | 1.08E-09 | 31 | BTG1    | Immune/Neutrophils |
| 1.1107E-13 | -0.2006571 | 0.154 | 0.36  | 2.24E-09 | 31 | HLA-B   | Immune/Neutrophils |
| 9.1581E-14 | -0.2311371 | 0.115 | 0.304 | 1.85E-09 | 31 | KLF6    | Immune/Neutrophils |
| 7.2135E-15 | -0.2118293 | 0.197 | 0.427 | 1.46E-10 | 31 | RPL15   | Immune/Neutrophils |
| 1.1784E-16 | -0.2298511 | 0.197 | 0.442 | 2.38E-12 | 31 | RPL9    | Immune/Neutrophils |
| 1.5524E-18 | -0.251847  | 0.177 | 0.434 | 3.14E-14 | 31 | H3F3B   | Immune/Neutrophils |
| 1.5784E-16 | -0.2298819 | 0.216 | 0.471 | 3.19E-12 | 31 | RPS13   | Immune/Neutrophils |
| 6.547E-09  | -0.2284382 | 0.135 | 0.28  | 0.000132 | 31 | LGALS1  | Immune/Neutrophils |
| 2.7571E-16 | -0.2571142 | 0.228 | 0.48  | 5.57E-12 | 31 | RPS2    | Immune/Neutrophils |
| 9.6868E-25 | -0.4071855 | 0.118 | 0.39  | 1.96E-20 | 31 | DUSP1   | Immune/Neutrophils |
| 2.1428E-12 | -0.2124839 | 0.326 | 0.549 | 4.33E-08 | 31 | RPL23A  | Immune/Neutrophils |
| 3.3876E-23 | -0.3148572 | 0.208 | 0.496 | 6.85E-19 | 31 | RPS26   | Immune/Neutrophils |
| 1.2191E-05 | -0.2552041 | 0.098 | 0.189 | 0.246347 | 31 | MT1X    | Immune/Neutrophils |
| 2.5608E-12 | -0.2195061 | 0.351 | 0.578 | 5.17E-08 | 31 | RPS23   | Immune/Neutrophils |
| 3.9878E-14 | -0.2528102 | 0.326 | 0.558 | 8.06E-10 | 31 | RPL18A  | Immune/Neutrophils |
| 3.3349E-14 | -0.2538596 | 0.348 | 0.595 | 6.74E-10 | 31 | RPL28   | Immune/Neutrophils |
| 5.766E-24  | -0.3348785 | 0.236 | 0.532 | 1.17E-19 | 31 | RPS3A   | Immune/Neutrophils |
| 3.0087E-12 | -0.242959  | 0.357 | 0.568 | 6.08E-08 | 31 | RPL12   | Immune/Neutrophils |
| 3.3255E-11 | -0.2992717 | 0.185 | 0.36  | 6.72E-07 | 31 | CD74    | Immune/Neutrophils |
| 7.7751E-15 | -0.2622069 | 0.348 | 0.587 | 1.57E-10 | 31 | RPL26   | Immune/Neutrophils |
| 3.9382E-12 | -0.2522496 | 0.393 | 0.602 | 7.96E-08 | 31 | RPS15A  | Immune/Neutrophils |
| 1.903E-27  | -0.3732331 | 0.253 | 0.568 | 3.85E-23 | 31 | TPT1    | Immune/Neutrophils |
| 7.2793E-22 | -0.601429  | 0.093 | 0.331 | 1.47E-17 | 31 | HLA-DRA | Immune/Neutrophils |
| 5.0518E-07 | -0.2060985 | 0.618 | 0.694 | 0.010209 | 31 | NEAT1   | Immune/Neutrophils |
| 1.1917E-05 | -0.2166814 | 0.823 | 0.793 | 0.240817 | 31 | TMSB10  | Immune/Neutrophils |
| 1.466E-11  | -0.2259592 | 1     | 0.997 | 2.96E-07 | 31 | MALAT1  | Immune/Neutrophils |
| 1.7763E-08 | -0.2266681 | 0.803 | 0.803 | 0.000359 | 31 | RPS19   | Immune/Neutrophils |
| 4.0539E-10 | -0.2440681 | 0.756 | 0.785 | 8.19E-06 | 31 | RPL10   | Immune/Neutrophils |
| 3.9143E-13 | -0.3667055 | 0.368 | 0.569 | 7.91E-09 | 31 | FTH1    | Immune/Neutrophils |

|            |            |       |       |          |    |           |                    |
|------------|------------|-------|-------|----------|----|-----------|--------------------|
| 4.7209E-13 | -0.2600926 | 0.789 | 0.821 | 9.54E-09 | 31 | RPL13     | Immune/Neutrophils |
| 1.6699E-12 | -0.3267848 | 0.525 | 0.658 | 3.37E-08 | 31 | ACTB      | Immune/Neutrophils |
| 4.8879E-14 | -0.2761492 | 0.969 | 0.947 | 9.88E-10 | 31 | RPL34     | Immune/Neutrophils |
| 7.1731E-18 | -0.3070734 | 0.893 | 0.907 | 1.45E-13 | 31 | RPL21     | Immune/Neutrophils |
| 5.6619E-18 | -0.511501  | 0.419 | 0.584 | 1.14E-13 | 31 | FOS       | Immune/Neutrophils |
| 4.4952E-31 | -0.4451104 | 0.826 | 0.872 | 9.08E-27 | 31 | RPL39     | Immune/Neutrophils |
| 3.1402E-09 | -1.5456974 | 0.051 | 0.168 | 6.35E-05 | 31 | IGKC      | Immune/Neutrophils |
| 6.9284E-29 | -0.5192281 | 0.907 | 0.886 | 1.4E-24  | 31 | TMSB4X    | Immune/Neutrophils |
| 1.3344E-06 | -0.7036872 | 0.736 | 0.702 | 0.026965 | 31 | FTL       | Immune/Neutrophils |
| 4.2772E-66 | -0.7755944 | 0.938 | 0.955 | 8.64E-62 | 31 | B2M       | Immune/Neutrophils |
| 0          | 0.99104881 | 1     | 0.031 | 0        | 32 | SPINK1    | Proximal Tubule-S1 |
| 0          | 0.74335403 | 0.644 | 0.035 | 0        | 32 | SLC5A12   | Proximal Tubule-S1 |
| 0          | 0.58346404 | 0.465 | 0.029 | 0        | 32 | MTRNR2L1  | Proximal Tubule-S1 |
| 8.3669E-44 | 0.42391194 | 0.476 | 0.168 | 1.69E-39 | 32 | WFDC2     | Proximal Tubule-S1 |
| 2.1322E-41 | 0.45071172 | 0.444 | 0.167 | 4.31E-37 | 32 | MTRNR2L12 | Proximal Tubule-S1 |
| 1.9193E-78 | 0.71309186 | 0.993 | 0.792 | 3.88E-74 | 32 | MT-ND4L   | Proximal Tubule-S1 |
| 2.6108E-76 | 0.63310715 | 0.996 | 0.886 | 5.28E-72 | 32 | MT-ND5    | Proximal Tubule-S1 |
| 4.2462E-20 | 0.34273255 | 0.382 | 0.194 | 8.58E-16 | 32 | MT-ATP8   | Proximal Tubule-S1 |
| 1.454E-77  | 0.61729583 | 1     | 0.952 | 2.94E-73 | 32 | MT-ND1    | Proximal Tubule-S1 |
| 5.8528E-23 | 0.27272572 | 0.389 | 0.169 | 1.18E-18 | 32 | DEFB1     | Proximal Tubule-S1 |
| 9.1274E-22 | 0.21320839 | 0.251 | 0.087 | 1.84E-17 | 32 | S100A2    | Proximal Tubule-S1 |
| 2.4974E-21 | 0.24991566 | 0.407 | 0.187 | 5.05E-17 | 32 | CLU       | Proximal Tubule-S1 |
| 3.3021E-10 | 0.25105485 | 0.335 | 0.208 | 6.67E-06 | 32 | HSPB1     | Proximal Tubule-S1 |
| 4.7518E-10 | 0.3020064  | 0.473 | 0.378 | 9.6E-06  | 32 | ATP5I     | Proximal Tubule-S1 |
| 5.5878E-45 | 0.37073766 | 1     | 0.99  | 1.13E-40 | 32 | MT-CYB    | Proximal Tubule-S1 |
| 2.946E-33  | 0.25065158 | 1     | 1     | 5.95E-29 | 32 | MT-CO2    | Proximal Tubule-S1 |
| 9.2435E-27 | 0.22852674 | 1     | 1     | 1.87E-22 | 32 | MT-ND4    | Proximal Tubule-S1 |
| 7.9908E-20 | 0.21684643 | 1     | 0.996 | 1.61E-15 | 32 | MT-ATP6   | Proximal Tubule-S1 |
| 4.3853E-30 | 0.21664698 | 1     | 1     | 8.86E-26 | 32 | MT-CO3    | Proximal Tubule-S1 |
| 1.2113E-08 | -0.2074531 | 0     | 0.106 | 0.000245 | 32 | C1QB      | Proximal Tubule-S1 |
| 7.2685E-12 | -0.2319122 | 0.004 | 0.153 | 1.47E-07 | 32 | RGS1      | Proximal Tubule-S1 |
| 1.9456E-08 | -0.2191558 | 0.004 | 0.11  | 0.000393 | 32 | CCL3      | Proximal Tubule-S1 |
| 7.8121E-12 | -0.3457879 | 0.004 | 0.153 | 1.58E-07 | 32 | LYZ       | Proximal Tubule-S1 |
| 5.6316E-12 | -0.2115356 | 0.007 | 0.16  | 1.14E-07 | 32 | CD52      | Proximal Tubule-S1 |
| 1.1323E-24 | -0.4015377 | 0.007 | 0.294 | 2.29E-20 | 32 | SRGN      | Proximal Tubule-S1 |
| 5.0121E-11 | -0.2121015 | 0.007 | 0.149 | 1.01E-06 | 32 | FCER1G    | Proximal Tubule-S1 |
| 1.821E-09  | -0.2436684 | 0.007 | 0.13  | 3.68E-05 | 32 | CXCL2     | Proximal Tubule-S1 |
| 2.1416E-16 | -0.2827525 | 0.011 | 0.217 | 4.33E-12 | 32 | CXCR4     | Proximal Tubule-S1 |
| 3.1033E-11 | -0.2498536 | 0.011 | 0.158 | 6.27E-07 | 32 | CCL5      | Proximal Tubule-S1 |
| 7.3062E-16 | -0.2640834 | 0.018 | 0.223 | 1.48E-11 | 32 | NFKBIA    | Proximal Tubule-S1 |
| 4.824E-13  | -0.2684437 | 0.015 | 0.185 | 9.75E-09 | 32 | TYROBP    | Proximal Tubule-S1 |
| 3.766E-07  | -0.2160994 | 0.011 | 0.104 | 0.00761  | 32 | CTGF      | Proximal Tubule-S1 |
| 3.9094E-16 | -0.2239446 | 0.029 | 0.244 | 7.9E-12  | 32 | SEC61G    | Proximal Tubule-S1 |
| 1.7487E-18 | -0.3035798 | 0.025 | 0.264 | 3.53E-14 | 32 | ZFP36     | Proximal Tubule-S1 |
| 3.3647E-08 | -0.2399496 | 0.015 | 0.124 | 0.00068  | 32 | C1QA      | Proximal Tubule-S1 |
| 3.6359E-15 | -0.2195633 | 0.036 | 0.245 | 7.35E-11 | 32 | POMP      | Proximal Tubule-S1 |
| 4.2102E-17 | -0.2697709 | 0.04  | 0.275 | 8.51E-13 | 32 | BTG1      | Proximal Tubule-S1 |
| 8.8938E-12 | -0.2616014 | 0.029 | 0.193 | 1.8E-07  | 32 | AIF1      | Proximal Tubule-S1 |

|            |            |       |       |          |    |          |                    |
|------------|------------|-------|-------|----------|----|----------|--------------------|
| 9.2865E-13 | -0.2398608 | 0.044 | 0.231 | 1.88E-08 | 32 | S100A4   | Proximal Tubule-S1 |
| 1.1547E-12 | -0.2004795 | 0.058 | 0.254 | 2.33E-08 | 32 | ZFP36L1  | Proximal Tubule-S1 |
| 8.6348E-16 | -0.2189347 | 0.062 | 0.296 | 1.74E-11 | 32 | DDX5     | Proximal Tubule-S1 |
| 1.7344E-12 | -0.2145984 | 0.055 | 0.24  | 3.5E-08  | 32 | SH3BGRL3 | Proximal Tubule-S1 |
| 1.9009E-18 | -0.3051605 | 0.051 | 0.304 | 3.84E-14 | 32 | KLF6     | Proximal Tubule-S1 |
| 2.3244E-13 | -0.2407438 | 0.062 | 0.264 | 4.7E-09  | 32 | FOSB     | Proximal Tubule-S1 |
| 3.8467E-07 | -0.2505207 | 0.033 | 0.141 | 0.007773 | 32 | TIMP1    | Proximal Tubule-S1 |
| 1.0427E-14 | -0.2516658 | 0.069 | 0.291 | 2.11E-10 | 32 | CYBA     | Proximal Tubule-S1 |
| 2.9588E-11 | -0.210274  | 0.073 | 0.256 | 5.98E-07 | 32 | VIM      | Proximal Tubule-S1 |
| 2.957E-16  | -0.2344897 | 0.102 | 0.36  | 5.98E-12 | 32 | HLA-B    | Proximal Tubule-S1 |
| 5.2801E-12 | -0.2142694 | 0.091 | 0.293 | 1.07E-07 | 32 | TXNIP    | Proximal Tubule-S1 |
| 1.2229E-27 | -0.4823895 | 0.055 | 0.39  | 2.47E-23 | 32 | DUSP1    | Proximal Tubule-S1 |
| 3.9346E-29 | -0.4079194 | 0.076 | 0.434 | 7.95E-25 | 32 | H3F3B    | Proximal Tubule-S1 |
| 6.6607E-16 | -0.2327866 | 0.12  | 0.39  | 1.35E-11 | 32 | EIF1     | Proximal Tubule-S1 |
| 6.7652E-16 | -0.2434488 | 0.116 | 0.381 | 1.37E-11 | 32 | H3F3A    | Proximal Tubule-S1 |
| 7.2731E-11 | -0.2403824 | 0.095 | 0.28  | 1.47E-06 | 32 | EGR1     | Proximal Tubule-S1 |
| 2.4695E-14 | -0.2199395 | 0.171 | 0.441 | 4.99E-10 | 32 | RPL9     | Proximal Tubule-S1 |
| 3.812E-13  | -0.2272552 | 0.171 | 0.426 | 7.7E-09  | 32 | RPS3     | Proximal Tubule-S1 |
| 1.7828E-10 | -0.2212368 | 0.164 | 0.374 | 3.6E-06  | 32 | PABPC1   | Proximal Tubule-S1 |
| 1.878E-13  | -0.2243244 | 0.222 | 0.503 | 3.8E-09  | 32 | RPL27A   | Proximal Tubule-S1 |
| 4.2751E-14 | -0.2395447 | 0.2   | 0.47  | 8.64E-10 | 32 | RPS13    | Proximal Tubule-S1 |
| 1.1246E-11 | -0.2046559 | 0.262 | 0.525 | 2.27E-07 | 32 | RPS24    | Proximal Tubule-S1 |
| 3.0709E-12 | -0.2231183 | 0.233 | 0.495 | 6.21E-08 | 32 | RPS26    | Proximal Tubule-S1 |
| 7.0176E-13 | -0.232198  | 0.229 | 0.496 | 1.42E-08 | 32 | RPL7     | Proximal Tubule-S1 |
| 8.0717E-22 | -0.6668676 | 0.055 | 0.33  | 1.63E-17 | 32 | HLA-DRA  | Proximal Tubule-S1 |
| 4.5532E-06 | -0.2281632 | 0.145 | 0.28  | 0.09201  | 32 | LGALS1   | Proximal Tubule-S1 |
| 2.235E-05  | -0.263681  | 0.087 | 0.189 | 0.451658 | 32 | MT1X     | Proximal Tubule-S1 |
| 4.1183E-15 | -0.2889514 | 0.207 | 0.48  | 8.32E-11 | 32 | RPS2     | Proximal Tubule-S1 |
| 4.4686E-09 | -0.2133014 | 0.356 | 0.593 | 9.03E-05 | 32 | RPLP2    | Proximal Tubule-S1 |
| 2.2103E-19 | -0.3300645 | 0.207 | 0.532 | 4.47E-15 | 32 | RPS3A    | Proximal Tubule-S1 |
| 4.8626E-10 | -0.2248397 | 0.349 | 0.595 | 9.83E-06 | 32 | RPL28    | Proximal Tubule-S1 |
| 2.0962E-28 | -0.4252686 | 0.182 | 0.568 | 4.24E-24 | 32 | TPT1     | Proximal Tubule-S1 |
| 9.529E-17  | -0.313845  | 0.255 | 0.558 | 1.93E-12 | 32 | RPL18A   | Proximal Tubule-S1 |
| 3.095E-11  | -0.2514229 | 0.349 | 0.611 | 6.25E-07 | 32 | RPS12    | Proximal Tubule-S1 |
| 8.4055E-12 | -0.3465579 | 0.153 | 0.36  | 1.7E-07  | 32 | CD74     | Proximal Tubule-S1 |
| 8.5462E-22 | -0.3806234 | 0.247 | 0.587 | 1.73E-17 | 32 | RPL26    | Proximal Tubule-S1 |
| 2.2784E-08 | -0.221449  | 0.545 | 0.694 | 0.00046  | 32 | RPS8     | Proximal Tubule-S1 |
| 7.2502E-17 | -0.345102  | 0.305 | 0.602 | 1.47E-12 | 32 | RPS15A   | Proximal Tubule-S1 |
| 4.4861E-07 | -0.2008901 | 0.716 | 0.795 | 0.009065 | 32 | RPL13A   | Proximal Tubule-S1 |
| 0.00151222 | -0.2767572 | 0.255 | 0.358 | 1        | 32 | MT2A     | Proximal Tubule-S1 |
| 2.1668E-07 | -0.2247041 | 0.749 | 0.804 | 0.004379 | 32 | RPS19    | Proximal Tubule-S1 |
| 2.1012E-11 | -0.261311  | 0.633 | 0.772 | 4.25E-07 | 32 | RPS27A   | Proximal Tubule-S1 |
| 9.6521E-06 | -0.2211669 | 0.807 | 0.813 | 0.19505  | 32 | RPS18    | Proximal Tubule-S1 |
| 6.9255E-10 | -0.2535063 | 0.753 | 0.821 | 1.4E-05  | 32 | RPL13    | Proximal Tubule-S1 |
| 3.5956E-06 | -0.267728  | 0.615 | 0.694 | 0.07266  | 32 | NEAT1    | Proximal Tubule-S1 |
| 7.2747E-14 | -0.4230537 | 0.324 | 0.569 | 1.47E-09 | 32 | FTH1     | Proximal Tubule-S1 |
| 2.0424E-12 | -0.2847828 | 0.687 | 0.785 | 4.13E-08 | 32 | RPL10    | Proximal Tubule-S1 |
| 9.162E-06  | -0.2528443 | 0.815 | 0.793 | 0.185146 | 32 | TMSB10   | Proximal Tubule-S1 |

|            |            |       |       |          |    |          |                    |
|------------|------------|-------|-------|----------|----|----------|--------------------|
| 2.3027E-14 | -0.2768578 | 0.807 | 0.847 | 4.65E-10 | 32 | PTMA     | Proximal Tubule-S1 |
| 1.2864E-16 | -0.4194693 | 0.444 | 0.658 | 2.6E-12  | 32 | ACTB     | Proximal Tubule-S1 |
| 1.2704E-20 | -0.3723104 | 0.862 | 0.907 | 2.57E-16 | 32 | RPL21    | Proximal Tubule-S1 |
| 2.2717E-24 | -0.652955  | 0.324 | 0.585 | 4.59E-20 | 32 | FOS      | Proximal Tubule-S1 |
| 8.1883E-20 | -0.3718613 | 0.942 | 0.947 | 1.65E-15 | 32 | RPL34    | Proximal Tubule-S1 |
| 5.033E-24  | -0.4332684 | 1     | 0.997 | 1.02E-19 | 32 | MALAT1   | Proximal Tubule-S1 |
| 3.0184E-07 | -1.536099  | 0.051 | 0.168 | 0.006099 | 32 | IGKC     | Proximal Tubule-S1 |
| 1.7728E-38 | -0.5650201 | 0.782 | 0.872 | 3.58E-34 | 32 | RPL39    | Proximal Tubule-S1 |
| 4.8004E-32 | -0.6416068 | 0.876 | 0.886 | 9.7E-28  | 32 | TMSB4X   | Proximal Tubule-S1 |
| 1.9665E-06 | -0.7304367 | 0.695 | 0.703 | 0.03974  | 32 | FTL      | Proximal Tubule-S1 |
| 3.1676E-74 | -1.0582739 | 0.913 | 0.955 | 6.4E-70  | 32 | B2M      | Proximal Tubule-S1 |
| 0          | 1.30787119 | 0.337 | 0.003 | 0        | 33 | IGLL5    | B cells            |
| 0          | 3.86002672 | 0.948 | 0.072 | 0        | 33 | IGHG3    | B cells            |
| 0          | 0.70612829 | 0.54  | 0.029 | 0        | 33 | MZB1     | B cells            |
| 1.9799E-88 | 1.90603369 | 0.357 | 0.06  | 4E-84    | 33 | IGLC3    | B cells            |
| 1.5263E-73 | 2.14042058 | 0.385 | 0.081 | 3.08E-69 | 33 | IGLC2    | B cells            |
| 1.8061E-90 | 0.46055183 | 0.103 | 0.005 | 3.65E-86 | 33 | IGLV3-25 | B cells            |
| 1.6846E-71 | 1.9648096  | 0.381 | 0.082 | 3.4E-67  | 33 | IGHG1    | B cells            |
| 1.02E-253  | 0.68718372 | 0.44  | 0.035 | 2.1E-249 | 33 | JCHAIN   | B cells            |
| 5.1696E-94 | 2.31741249 | 0.599 | 0.165 | 1.04E-89 | 33 | IGKC     | B cells            |
| 4.152E-122 | 0.33188113 | 0.123 | 0.006 | 8.4E-118 | 33 | IGLV6-57 | B cells            |
| 1.136E-196 | 0.71607996 | 0.567 | 0.075 | 2.3E-192 | 33 | XBP1     | B cells            |
| 1.458E-172 | 1.12186364 | 0.734 | 0.155 | 2.9E-168 | 33 | SSR4     | B cells            |
| 9.4246E-97 | 0.33090702 | 0.159 | 0.012 | 1.9E-92  | 33 | IGLV3-1  | B cells            |
| 5.429E-180 | 0.2064919  | 0.19  | 0.009 | 1.1E-175 | 33 | DERL3    | B cells            |
| 6.0263E-59 | 0.58907049 | 0.202 | 0.029 | 1.22E-54 | 33 | IGHGP    | B cells            |
| 2.8832E-61 | 0.4356843  | 0.159 | 0.018 | 5.83E-57 | 33 | IGHG2    | B cells            |
| 1.169E-162 | 0.34432592 | 0.333 | 0.031 | 2.4E-158 | 33 | FKBP11   | B cells            |
| 6.387E-54  | 0.28368874 | 0.123 | 0.012 | 1.29E-49 | 33 | IGHM     | B cells            |
| 9.869E-101 | 0.23891553 | 0.242 | 0.026 | 1.99E-96 | 33 | PIM2     | B cells            |
| 1.2157E-53 | 0.2120294  | 0.242 | 0.043 | 2.46E-49 | 33 | ANKRD28  | B cells            |
| 8.9209E-47 | 0.20429173 | 0.298 | 0.068 | 1.8E-42  | 33 | SPCS3    | B cells            |
| 6.6728E-40 | 0.23164155 | 0.361 | 0.104 | 1.35E-35 | 33 | FKBP2    | B cells            |
| 4.9428E-32 | 0.38116613 | 0.607 | 0.288 | 9.99E-28 | 33 | CYBA     | B cells            |
| 2.8559E-32 | 0.27167597 | 0.381 | 0.134 | 5.77E-28 | 33 | SPCS2    | B cells            |
| 6.8542E-29 | 0.28637105 | 0.488 | 0.21  | 1.39E-24 | 33 | SUB1     | B cells            |
| 6.5981E-23 | 0.21471179 | 0.25  | 0.081 | 1.33E-18 | 33 | PRDM1    | B cells            |
| 8.0067E-23 | 0.22176591 | 0.325 | 0.123 | 1.62E-18 | 33 | BTG2     | B cells            |
| 4.2823E-21 | 0.20959884 | 0.298 | 0.112 | 8.65E-17 | 33 | HERPUD1  | B cells            |
| 4.0198E-20 | 0.21261768 | 0.365 | 0.151 | 8.12E-16 | 33 | RGS1     | B cells            |
| 1.254E-18  | 0.23595422 | 0.48  | 0.242 | 2.53E-14 | 33 | SEC61G   | B cells            |
| 1.0676E-13 | 0.28875788 | 0.516 | 0.322 | 2.16E-09 | 33 | JUN      | B cells            |
| 2.7365E-13 | 0.20917287 | 0.333 | 0.164 | 5.53E-09 | 33 | HSP90B1  | B cells            |
| 5.92E-17   | 0.30179696 | 0.984 | 0.997 | 1.2E-12  | 33 | MALAT1   | B cells            |
| 2.9769E-05 | 0.22909228 | 0.548 | 0.464 | 0.601579 | 33 | HSP90AA1 | B cells            |
| 1.8351E-06 | 0.20434214 | 0.766 | 0.693 | 0.037083 | 33 | NEAT1    | B cells            |
| 1.2097E-08 | 0.21075073 | 0.857 | 0.803 | 0.000244 | 33 | RPLP1    | B cells            |
| 1.6601E-07 | -0.2657927 | 0.048 | 0.171 | 0.003355 | 33 | DEFB1    | B cells            |

|            |            |       |       |          |    |          |         |
|------------|------------|-------|-------|----------|----|----------|---------|
| 8.2654E-09 | -0.2963847 | 0.048 | 0.189 | 0.000167 | 33 | CLU      | B cells |
| 2.9467E-07 | -0.2755971 | 0.052 | 0.171 | 0.005955 | 33 | WFDC2    | B cells |
| 1.1935E-07 | -0.2414646 | 0.079 | 0.211 | 0.002412 | 33 | FXD2     | B cells |
| 1.5222E-08 | -0.250248  | 0.099 | 0.246 | 0.000308 | 33 | IGFBP7   | B cells |
| 1.7599E-07 | -0.262176  | 0.087 | 0.222 | 0.003556 | 33 | ADIRF    | B cells |
| 7.673E-09  | -0.2464711 | 0.119 | 0.278 | 0.000155 | 33 | CST3     | B cells |
| 5.3156E-07 | -0.2812544 | 0.103 | 0.231 | 0.010742 | 33 | ATP1B1   | B cells |
| 5.5649E-08 | -0.2208717 | 0.21  | 0.361 | 0.001125 | 33 | CALM2    | B cells |
| 8.9378E-12 | -0.459027  | 0.083 | 0.267 | 1.81E-07 | 33 | SPP1     | B cells |
| 2.5624E-08 | -0.2334172 | 0.381 | 0.525 | 0.000518 | 33 | RPS24    | B cells |
| 1.7116E-06 | -0.2744015 | 0.222 | 0.358 | 0.034587 | 33 | MT2A     | B cells |
| 7.0562E-12 | -0.3224226 | 0.226 | 0.413 | 1.43E-07 | 33 | ITM2B    | B cells |
| 6.6758E-08 | -0.2236963 | 0.456 | 0.576 | 0.001349 | 33 | ATP5E    | B cells |
| 0.0004022  | -0.2365687 | 0.274 | 0.359 | 1        | 33 | CD74     | B cells |
| 2.7528E-09 | -0.2715348 | 0.397 | 0.568 | 5.56E-05 | 33 | FTH1     | B cells |
| 2.3901E-18 | -0.4843805 | 0.194 | 0.456 | 4.83E-14 | 33 | S100A6   | B cells |
| 9.8552E-13 | -0.2542465 | 0.694 | 0.847 | 1.99E-08 | 33 | PTMA     | B cells |
| 9.2644E-12 | -0.2194611 | 0.992 | 0.996 | 1.87E-07 | 33 | MT-ND2   | B cells |
| 6.8629E-15 | -0.3502719 | 0.425 | 0.658 | 1.39E-10 | 33 | ACTB     | B cells |
| 1.483E-16  | -0.2460083 | 0.996 | 1     | 3E-12    | 33 | MT-ND4   | B cells |
| 1.0023E-11 | -0.2594037 | 0.972 | 0.99  | 2.03E-07 | 33 | MT-CYB   | B cells |
| 7.8481E-19 | -0.2560444 | 1     | 1     | 1.59E-14 | 33 | MT-CO1   | B cells |
| 3.351E-08  | -0.4664629 | 0.183 | 0.33  | 0.000677 | 33 | HLA-DRA  | B cells |
| 5.0685E-14 | -0.2691512 | 0.972 | 0.996 | 1.02E-09 | 33 | MT-ATP6  | B cells |
| 3.2295E-26 | -0.4146685 | 0.472 | 0.739 | 6.53E-22 | 33 | EEF1A1   | B cells |
| 2.1406E-20 | -0.2706362 | 1     | 1     | 4.33E-16 | 33 | MT-CO2   | B cells |
| 0.00947409 | -0.3843367 | 0.155 | 0.217 | 1        | 33 | MT1G     | B cells |
| 1.2472E-18 | -0.2782112 | 1     | 1     | 2.52E-14 | 33 | MT-CO3   | B cells |
| 2.782E-23  | -0.4496942 | 0.532 | 0.795 | 5.62E-19 | 33 | TMSB10   | B cells |
| 4.7034E-17 | -0.4381796 | 0.742 | 0.887 | 9.5E-13  | 33 | TMSB4X   | B cells |
| 2.1354E-15 | -0.4016842 | 0.81  | 0.887 | 4.32E-11 | 33 | MT-ND5   | B cells |
| 1.5955E-17 | -0.4110309 | 0.877 | 0.952 | 3.22E-13 | 33 | MT-ND1   | B cells |
| 7.4479E-14 | -0.4530971 | 0.702 | 0.793 | 1.51E-09 | 33 | MT-ND4L  | B cells |
| 0          | 0.71095139 | 0.662 | 0.005 | 0        | 34 | TOP2A    | T cells |
| 0          | 0.41556375 | 0.366 | 0.003 | 0        | 34 | CENPF    | T cells |
| 0          | 0.35578885 | 0.319 | 0.003 | 0        | 34 | UBE2C    | T cells |
| 0          | 0.24281345 | 0.244 | 0.002 | 0        | 34 | ASPM     | T cells |
| 0          | 0.42752626 | 0.418 | 0.009 | 0        | 34 | KIAA0101 | T cells |
| 0          | 0.2607912  | 0.258 | 0.005 | 0        | 34 | NUSAP1   | T cells |
| 0          | 0.86372672 | 0.685 | 0.06  | 0        | 34 | HMGB2    | T cells |
| 2.439E-241 | 0.68294714 | 0.606 | 0.062 | 4.9E-237 | 34 | STMN1    | T cells |
| 8.268E-183 | 0.20699761 | 0.221 | 0.011 | 1.7E-178 | 34 | PTTG1    | T cells |
| 3.648E-150 | 0.23277809 | 0.235 | 0.014 | 7.4E-146 | 34 | CKS1B    | T cells |
| 2.125E-132 | 0.81152261 | 0.704 | 0.152 | 4.3E-128 | 34 | HMGN2    | T cells |
| 2.5502E-98 | 0.77966924 | 0.559 | 0.118 | 5.15E-94 | 34 | HIST1H4C | T cells |
| 5.177E-140 | 0.23946745 | 0.258 | 0.019 | 1E-135   | 34 | SMC4     | T cells |
| 6.704E-105 | 0.29102812 | 0.315 | 0.035 | 1.4E-100 | 34 | CKS2     | T cells |
| 2.696E-101 | 0.55004033 | 0.592 | 0.125 | 5.45E-97 | 34 | H2AFZ    | T cells |

|            |            |       |       |          |    |           |         |
|------------|------------|-------|-------|----------|----|-----------|---------|
| 1.0207E-90 | 0.41118889 | 0.446 | 0.078 | 2.06E-86 | 34 | TUBB      | T cells |
| 4.6788E-92 | 0.22061763 | 0.249 | 0.025 | 9.46E-88 | 34 | TMPO      | T cells |
| 3.9957E-74 | 0.4327041  | 0.46  | 0.097 | 8.07E-70 | 34 | TUBA1B    | T cells |
| 5.7575E-77 | 0.252658   | 0.268 | 0.034 | 1.16E-72 | 34 | DUSP4     | T cells |
| 5.0025E-74 | 0.77965848 | 0.765 | 0.314 | 1.01E-69 | 34 | HMGB1     | T cells |
| 5.1245E-66 | 0.23963697 | 0.277 | 0.041 | 1.04E-61 | 34 | ANP32E    | T cells |
| 1.6863E-60 | 0.57823192 | 0.732 | 0.29  | 3.41E-56 | 34 | PFN1      | T cells |
| 4.927E-58  | 0.24008299 | 0.319 | 0.059 | 9.96E-54 | 34 | ANP32B    | T cells |
| 1.5414E-45 | 0.26507911 | 0.305 | 0.065 | 3.11E-41 | 34 | ITM2A     | T cells |
| 9.6991E-39 | 0.34270214 | 0.441 | 0.137 | 1.96E-34 | 34 | CRIP1     | T cells |
| 1.7618E-42 | 0.26053795 | 0.333 | 0.079 | 3.56E-38 | 34 | CD3D      | T cells |
| 4.4859E-31 | 0.34698264 | 0.371 | 0.121 | 9.07E-27 | 34 | ARL6IP1   | T cells |
| 6.4194E-42 | 0.20411884 | 0.258 | 0.051 | 1.3E-37  | 34 | RAD21     | T cells |
| 3.1978E-29 | 0.36537717 | 0.432 | 0.156 | 6.46E-25 | 34 | CCL5      | T cells |
| 3.5282E-25 | 0.36613287 | 0.404 | 0.151 | 7.13E-21 | 34 | RGS1      | T cells |
| 3.4282E-35 | 0.23144102 | 0.277 | 0.066 | 6.93E-31 | 34 | NKG7      | T cells |
| 4.7015E-46 | 0.69260833 | 0.897 | 0.656 | 9.5E-42  | 34 | ACTB      | T cells |
| 1.4572E-34 | 0.21105439 | 0.263 | 0.061 | 2.94E-30 | 34 | CORO1A    | T cells |
| 9.0119E-27 | 0.31971794 | 0.423 | 0.158 | 1.82E-22 | 34 | CD52      | T cells |
| 1.8809E-33 | 0.24837152 | 0.352 | 0.103 | 3.8E-29  | 34 | LSM5      | T cells |
| 1.9678E-31 | 0.20964041 | 0.272 | 0.069 | 3.98E-27 | 34 | CD2       | T cells |
| 6.9967E-51 | 0.64574614 | 0.977 | 0.846 | 1.41E-46 | 34 | PTMA      | T cells |
| 2.0551E-23 | 0.33139417 | 0.465 | 0.21  | 4.15E-19 | 34 | SUB1      | T cells |
| 3.7456E-23 | 0.29578514 | 0.437 | 0.179 | 7.57E-19 | 34 | IL32      | T cells |
| 1.469E-25  | 0.30507645 | 0.498 | 0.214 | 2.97E-21 | 34 | CFL1      | T cells |
| 7.3882E-25 | 0.22402835 | 0.329 | 0.109 | 1.49E-20 | 34 | IFI16     | T cells |
| 1.4275E-22 | 0.25050909 | 0.394 | 0.155 | 2.88E-18 | 34 | NUCKS1    | T cells |
| 1.0666E-32 | 0.56606414 | 0.972 | 0.886 | 2.16E-28 | 34 | TMSB4X    | T cells |
| 4.0649E-22 | 0.29538359 | 0.549 | 0.272 | 8.21E-18 | 34 | PPIA      | T cells |
| 1.4856E-15 | 0.22878028 | 0.282 | 0.11  | 3E-11    | 34 | CCL4      | T cells |
| 5.4005E-20 | 0.2287887  | 0.343 | 0.134 | 1.09E-15 | 34 | PTPRC     | T cells |
| 6.098E-20  | 0.25672625 | 0.474 | 0.215 | 1.23E-15 | 34 | CXCR4     | T cells |
| 3.605E-20  | 0.22717018 | 0.371 | 0.149 | 7.29E-16 | 34 | SRSF3     | T cells |
| 6.3341E-20 | 0.2115555  | 0.343 | 0.132 | 1.28E-15 | 34 | SNRPG     | T cells |
| 5.8608E-14 | 0.23540675 | 0.305 | 0.131 | 1.18E-09 | 34 | CD69      | T cells |
| 1.3962E-16 | 0.25688078 | 0.474 | 0.238 | 2.82E-12 | 34 | SH3BGRL3  | T cells |
| 2.2369E-18 | 0.23689378 | 0.446 | 0.207 | 4.52E-14 | 34 | HNRNPA2B1 | T cells |
| 8.5814E-16 | 0.24694193 | 0.479 | 0.245 | 1.73E-11 | 34 | GAPDH     | T cells |
| 1.7226E-15 | 0.21256719 | 0.362 | 0.164 | 3.48E-11 | 34 | NPM1      | T cells |
| 1.4826E-16 | 0.2132589  | 0.399 | 0.183 | 3E-12    | 34 | HNRNPA1   | T cells |
| 2.49E-15   | 0.29239103 | 0.737 | 0.493 | 5.03E-11 | 34 | RPS26     | T cells |
| 2.5264E-11 | 0.26626592 | 0.559 | 0.359 | 5.11E-07 | 34 | CALM2     | T cells |
| 2.9874E-17 | 0.36134321 | 0.906 | 0.802 | 6.04E-13 | 34 | RPLP1     | T cells |
| 1.9887E-15 | 0.29776038 | 0.793 | 0.593 | 4.02E-11 | 34 | RPL28     | T cells |
| 1.748E-09  | 0.2397152  | 0.46  | 0.282 | 3.53E-05 | 34 | HNRNPH1   | T cells |
| 4.692E-09  | 0.28215366 | 0.653 | 0.478 | 9.48E-05 | 34 | RPS2      | T cells |
| 1.2109E-08 | 0.21787191 | 0.399 | 0.241 | 0.000245 | 34 | MYL12A    | T cells |
| 1.9051E-17 | 0.33585505 | 0.991 | 0.955 | 3.85E-13 | 34 | B2M       | T cells |

|            |            |       |       |          |    |         |              |
|------------|------------|-------|-------|----------|----|---------|--------------|
| 2.6065E-09 | 0.21350806 | 0.469 | 0.294 | 5.27E-05 | 34 | ACTG1   | T cells      |
| 0.0030583  | 0.22214067 | 0.357 | 0.279 | 1        | 34 | LGALS1  | T cells      |
| 4.9789E-08 | 0.20046978 | 0.864 | 0.784 | 0.001006 | 34 | RPS15   | T cells      |
| 4.5067E-06 | -0.2118551 | 0.023 | 0.129 | 0.091071 | 34 | CXCL2   | T cells      |
| 0.00017489 | -0.2545993 | 0.028 | 0.107 | 1        | 34 | IGFBP5  | T cells      |
| 5.3518E-07 | -0.2749939 | 0.042 | 0.171 | 0.010815 | 34 | WFDC2   | T cells      |
| 8.741E-07  | -0.2250919 | 0.056 | 0.185 | 0.017664 | 34 | TYROBP  | T cells      |
| 1.5838E-07 | -0.2196935 | 0.066 | 0.211 | 0.003201 | 34 | PSAP    | T cells      |
| 5.9087E-09 | -0.2384861 | 0.07  | 0.238 | 0.000119 | 34 | IFITM3  | T cells      |
| 1.102E-06  | -0.2776389 | 0.047 | 0.171 | 0.022269 | 34 | DEFB1   | T cells      |
| 2.1566E-07 | -0.2168634 | 0.089 | 0.246 | 0.004358 | 34 | IGFBP7  | T cells      |
| 2.1225E-06 | -0.2693739 | 0.061 | 0.189 | 0.042892 | 34 | CLU     | T cells      |
| 5.445E-07  | -0.2526667 | 0.075 | 0.211 | 0.011003 | 34 | FXD2    | T cells      |
| 6.3544E-09 | -0.2626031 | 0.103 | 0.277 | 0.000128 | 34 | CST3    | T cells      |
| 4.4051E-09 | -0.2838097 | 0.103 | 0.279 | 8.9E-05  | 34 | EGR1    | T cells      |
| 4.7436E-09 | -0.3819103 | 0.061 | 0.222 | 9.59E-05 | 34 | ADIRF   | T cells      |
| 0.00260066 | -0.221256  | 0.07  | 0.14  | 1        | 34 | TIMP1   | T cells      |
| 5.6127E-16 | -0.3523825 | 0.131 | 0.413 | 1.13E-11 | 34 | ITM2B   | T cells      |
| 4.7454E-07 | -0.3076525 | 0.089 | 0.231 | 0.00959  | 34 | ATP1B1  | T cells      |
| 1.524E-10  | -0.5228529 | 0.075 | 0.267 | 3.08E-06 | 34 | SPP1    | T cells      |
| 2.2815E-06 | -0.2941951 | 0.277 | 0.417 | 0.046104 | 34 | SAT1    | T cells      |
| 0.0013211  | -0.2158576 | 0.77  | 0.793 | 1        | 34 | MT-ND4L | T cells      |
| 6.1703E-08 | -0.2726657 | 0.554 | 0.694 | 0.001247 | 34 | NEAT1   | T cells      |
| 1.0148E-06 | -0.3340978 | 0.315 | 0.456 | 0.020507 | 34 | S100A6  | T cells      |
| 1.4976E-06 | -0.253109  | 1     | 0.997 | 0.030264 | 34 | MALAT1  | T cells      |
| 1.5754E-11 | -0.4662838 | 0.394 | 0.584 | 3.18E-07 | 34 | FOS     | T cells      |
| 8.2578E-14 | -0.5063833 | 0.362 | 0.568 | 1.67E-09 | 34 | FTH1    | T cells      |
| 7.7093E-15 | -0.7464859 | 0.493 | 0.704 | 1.56E-10 | 34 | FTL     | T cells      |
| 0          | 1.22770642 | 0.434 | 0.001 | 0        | 35 | CCL21   | Mixed marker |
| 0          | 0.6237389  | 0.372 | 0.003 | 0        | 35 | TFF3    | Mixed marker |
| 0          | 0.65103017 | 0.25  | 0.006 | 0        | 35 | IL1RL1  | Mixed marker |
| 0          | 0.63822306 | 0.372 | 0.009 | 0        | 35 | FABP4   | Mixed marker |
| 1.7171E-62 | 0.27901245 | 0.255 | 0.035 | 3.47E-58 | 35 | TFPI    | Mixed marker |
| 9.9075E-39 | 0.47719317 | 0.383 | 0.106 | 2E-34    | 35 | CALD1   | Mixed marker |
| 1.9393E-20 | 0.30822095 | 0.291 | 0.096 | 3.92E-16 | 35 | MGP     | Mixed marker |
| 4.5021E-19 | 0.24649429 | 0.306 | 0.106 | 9.1E-15  | 35 | IGFBP5  | Mixed marker |
| 2.772E-18  | 0.33009688 | 0.505 | 0.244 | 5.6E-14  | 35 | IGFBP7  | Mixed marker |
| 8.4461E-20 | 0.28828435 | 0.5   | 0.221 | 1.71E-15 | 35 | ADIRF   | Mixed marker |
| 4.2895E-20 | 0.20542961 | 0.286 | 0.093 | 8.67E-16 | 35 | TIMP3   | Mixed marker |
| 2.2518E-12 | 0.32657943 | 0.49  | 0.278 | 4.55E-08 | 35 | LGALS1  | Mixed marker |
| 9.3886E-16 | 0.25939888 | 0.48  | 0.237 | 1.9E-11  | 35 | IFITM3  | Mixed marker |
| 2.3355E-07 | 0.22472501 | 0.408 | 0.26  | 0.004719 | 35 | POLR2L  | Mixed marker |
| 3.7552E-06 | -0.3124754 | 0.036 | 0.152 | 0.075886 | 35 | LYZ     | Mixed marker |
| 2.77E-05   | -0.2043375 | 0.077 | 0.193 | 0.559761 | 35 | AIF1    | Mixed marker |
| 5.1295E-05 | -0.2004761 | 0.077 | 0.185 | 1        | 35 | TYROBP  | Mixed marker |
| 0.00015552 | -0.2391138 | 0.071 | 0.171 | 1        | 35 | DEFB1   | Mixed marker |
| 0.00036196 | -0.2117762 | 0.122 | 0.231 | 1        | 35 | ATP1B1  | Mixed marker |
| 0.00078256 | -0.2035996 | 0.281 | 0.388 | 1        | 35 | DUSP1   | Mixed marker |

|            |            |       |       |          |    |            |              |
|------------|------------|-------|-------|----------|----|------------|--------------|
| 0.00972307 | -0.21426   | 0.286 | 0.359 | 1        | 35 | CD74       | Mixed marker |
| 7.3682E-09 | -0.3436698 | 0.224 | 0.417 | 0.000149 | 35 | SAT1       | Mixed marker |
| 2.7286E-05 | -0.3992276 | 0.138 | 0.267 | 0.551386 | 35 | SPP1       | Mixed marker |
| 8.7558E-07 | -0.2285904 | 0.878 | 0.947 | 0.017694 | 35 | RPS27      | Mixed marker |
| 8.408E-06  | -0.4572136 | 0.199 | 0.329 | 0.169909 | 35 | HLA-DRA    | Mixed marker |
| 0.00010336 | -0.5830862 | 0.638 | 0.703 | 1        | 35 | FTL        | Mixed marker |
| 0          | 4.182747   | 1     | 0.024 | 0        | 36 | IGHG4      | B cells      |
| 1.316E-212 | 3.9088565  | 0.662 | 0.059 | 2.7E-208 | 36 | IGLC3      | B cells      |
| 0          | 1.09335332 | 0.41  | 0.013 | 0        | 36 | IGLV3-21   | B cells      |
| 3.845E-300 | 0.26115503 | 0.165 | 0.002 | 7.8E-296 | 36 | IGHV1-69-2 | B cells      |
| 1.2187E-55 | 2.49478511 | 0.612 | 0.166 | 2.46E-51 | 36 | IGKC       | B cells      |
| 1.681E-181 | 0.4937847  | 0.453 | 0.03  | 3.4E-177 | 36 | MZB1       | B cells      |
| 1.034E-103 | 0.99596127 | 0.763 | 0.156 | 2.1E-99  | 36 | SSR4       | B cells      |
| 1.3903E-49 | 0.51644614 | 0.273 | 0.036 | 2.81E-45 | 36 | JCHAIN     | B cells      |
| 1.1988E-48 | 0.46247502 | 0.403 | 0.077 | 2.42E-44 | 36 | XBP1       | B cells      |
| 5.4781E-54 | 0.23817619 | 0.237 | 0.026 | 1.11E-49 | 36 | PIM2       | B cells      |
| 1.5143E-48 | 0.21291282 | 0.23  | 0.027 | 3.06E-44 | 36 | PRDX4      | B cells      |
| 9.4622E-40 | 0.20592168 | 0.23  | 0.032 | 1.91E-35 | 36 | FKBP11     | B cells      |
| 3.8637E-20 | 0.203852   | 0.201 | 0.043 | 7.81E-16 | 36 | ANKRD28    | B cells      |
| 6.661E-17  | 0.20044206 | 0.324 | 0.105 | 1.35E-12 | 36 | FKBP2      | B cells      |
| 8.6444E-05 | 0.20614975 | 0.417 | 0.28  | 1        | 36 | HSPA1B     | B cells      |
| 2.1181E-05 | 0.20496231 | 0.482 | 0.323 | 0.428019 | 36 | JUN        | B cells      |
| 3.8119E-05 | -0.2053    | 0.029 | 0.156 | 0.770314 | 36 | HES1       | B cells      |
| 0.00114444 | -0.2239196 | 0.022 | 0.107 | 1        | 36 | IGFBP5     | B cells      |
| 6.648E-06  | -0.238354  | 0.079 | 0.245 | 0.134343 | 36 | IGFBP7     | B cells      |
| 4.1276E-06 | -0.2962046 | 0.058 | 0.222 | 0.083411 | 36 | ADIRF      | B cells      |
| 2.7853E-08 | -0.2607857 | 0.108 | 0.329 | 0.000563 | 36 | SRP14      | B cells      |
| 9.5296E-05 | -0.2038402 | 0.101 | 0.238 | 1        | 36 | IFITM3     | B cells      |
| 6.2177E-05 | -0.2062653 | 0.122 | 0.277 | 1        | 36 | CST3       | B cells      |
| 6.5912E-06 | -0.209679  | 0.137 | 0.311 | 0.133195 | 36 | MYL6       | B cells      |
| 0.00169868 | -0.223194  | 0.072 | 0.17  | 1        | 36 | WFDC2      | B cells      |
| 0.0002899  | -0.2733236 | 0.072 | 0.189 | 1        | 36 | CLU        | B cells      |
| 0.00010998 | -0.2817321 | 0.094 | 0.23  | 1        | 36 | ATP1B1     | B cells      |
| 2.24E-06   | -0.2509655 | 0.18  | 0.361 | 0.045265 | 36 | CALM2      | B cells      |
| 5.5798E-05 | -0.2289185 | 0.23  | 0.379 | 1        | 36 | ATP5I      | B cells      |
| 1.2313E-05 | -0.2598731 | 0.245 | 0.413 | 0.248828 | 36 | ITM2B      | B cells      |
| 5.4172E-05 | -0.2116866 | 0.612 | 0.772 | 1        | 36 | RPS27A     | B cells      |
| 2.8967E-05 | -0.3979774 | 0.115 | 0.267 | 0.585374 | 36 | SPP1       | B cells      |
| 0.00040655 | -0.270847  | 0.23  | 0.359 | 1        | 36 | CD74       | B cells      |
| 0.00088518 | -0.210739  | 0.468 | 0.563 | 1        | 36 | RPS25      | B cells      |
| 3.2193E-06 | -0.2517014 | 0.439 | 0.61  | 0.065055 | 36 | RPS12      | B cells      |
| 8.795E-05  | -0.2278434 | 0.46  | 0.576 | 1        | 36 | RPS23      | B cells      |
| 1.2235E-05 | -0.2467864 | 0.41  | 0.556 | 0.247249 | 36 | RPL37A     | B cells      |
| 3.7282E-06 | -0.3279647 | 0.237 | 0.417 | 0.075339 | 36 | SAT1       | B cells      |
| 8.9069E-06 | -0.3571069 | 0.187 | 0.358 | 0.17999  | 36 | MT2A       | B cells      |
| 2.2433E-06 | -0.2596401 | 0.417 | 0.576 | 0.045332 | 36 | ATP5E      | B cells      |
| 3.2541E-05 | -0.3982288 | 0.173 | 0.329 | 0.657596 | 36 | HLA-DRA    | B cells      |
| 6.0177E-06 | -0.2496881 | 0.719 | 0.847 | 0.121606 | 36 | PTMA       | B cells      |

|            |            |       |       |          |    |          |                         |
|------------|------------|-------|-------|----------|----|----------|-------------------------|
| 1.2894E-12 | -0.3469863 | 0.475 | 0.738 | 2.61E-08 | 36 | EEF1A1   | B cells                 |
| 7.6932E-12 | -0.4212644 | 0.353 | 0.658 | 1.55E-07 | 36 | ACTB     | B cells                 |
| 5.549E-07  | -0.3819698 | 0.273 | 0.456 | 0.011213 | 36 | S100A6   | B cells                 |
| 5.0707E-08 | -0.2404373 | 1     | 0.998 | 0.001025 | 36 | MT-ND3   | B cells                 |
| 3.6892E-11 | -0.4918662 | 0.295 | 0.568 | 7.46E-07 | 36 | FTH1     | B cells                 |
| 7.7521E-10 | -0.2920251 | 0.993 | 0.996 | 1.57E-05 | 36 | MT-ND2   | B cells                 |
| 1.2132E-15 | -0.4704146 | 0.511 | 0.794 | 2.45E-11 | 36 | TMSB10   | B cells                 |
| 8.7555E-11 | -0.3115568 | 0.971 | 0.996 | 1.77E-06 | 36 | MT-ATP6  | B cells                 |
| 5.7666E-14 | -0.3340343 | 1     | 1     | 1.17E-09 | 36 | MT-ND4   | B cells                 |
| 7.841E-16  | -0.3492802 | 1     | 1     | 1.58E-11 | 36 | MT-CO1   | B cells                 |
| 8.2458E-18 | -0.3687442 | 1     | 1     | 1.67E-13 | 36 | MT-CO2   | B cells                 |
| 1.3557E-12 | -0.4905438 | 0.669 | 0.887 | 2.74E-08 | 36 | TMSB4X   | B cells                 |
| 3.9182E-10 | -0.4887224 | 0.64  | 0.793 | 7.92E-06 | 36 | MT-ND4L  | B cells                 |
| 1.0688E-13 | -0.4626595 | 0.813 | 0.952 | 2.16E-09 | 36 | MT-ND1   | B cells                 |
| 4.1277E-19 | -0.4039443 | 1     | 1     | 8.34E-15 | 36 | MT-CO3   | B cells                 |
| 2.4094E-15 | -0.4226139 | 0.95  | 0.99  | 4.87E-11 | 36 | MT-CYB   | B cells                 |
| 5.3949E-13 | -0.4685209 | 0.77  | 0.887 | 1.09E-08 | 36 | MT-ND5   | B cells                 |
| 1.3349E-06 | -0.2550811 | 0.201 | 0.083 | 0.026976 | 36 | IGHG1    | B cells                 |
| 2.5398E-06 | -0.2743504 | 0.187 | 0.076 | 0.051324 | 36 | IGHG3    | B cells                 |
| 0          | 0.22860986 | 0.213 | 0     | 0        | 37 | LILRA4   | Immune/Plasmacytoid DCs |
| 0          | 0.25747017 | 0.25  | 0     | 0        | 37 | SCT      | Immune/Plasmacytoid DCs |
| 0          | 0.41405872 | 0.397 | 0.006 | 0        | 37 | BCL11A   | Immune/Plasmacytoid DCs |
| 0          | 0.97458408 | 0.801 | 0.032 | 0        | 37 | GZMB     | Immune/Plasmacytoid DCs |
| 0          | 0.86311984 | 0.779 | 0.035 | 0        | 37 | JCHAIN   | Immune/Plasmacytoid DCs |
| 0          | 0.65189901 | 0.574 | 0.024 | 0        | 37 | PLAC8    | Immune/Plasmacytoid DCs |
| 0          | 0.45155021 | 0.434 | 0.014 | 0        | 37 | CLIC3    | Immune/Plasmacytoid DCs |
| 2.164E-303 | 0.20243125 | 0.184 | 0.003 | 4.4E-299 | 37 | PLD4     | Immune/Plasmacytoid DCs |
| 2.37E-296  | 0.22367776 | 0.243 | 0.005 | 4.8E-292 | 37 | SERPINF1 | Immune/Plasmacytoid DCs |
| 5.352E-243 | 0.38425132 | 0.426 | 0.02  | 1.1E-238 | 37 | IRF8     | Immune/Plasmacytoid DCs |
| 5.363E-242 | 0.32412264 | 0.368 | 0.015 | 1.1E-237 | 37 | IRF7     | Immune/Plasmacytoid DCs |
| 1.106E-203 | 0.24303795 | 0.257 | 0.008 | 2.2E-199 | 37 | IRF4     | Immune/Plasmacytoid DCs |
| 1.409E-171 | 0.29058228 | 0.272 | 0.011 | 2.8E-167 | 37 | TSPAN13  | Immune/Plasmacytoid DCs |
| 3.21E-166  | 0.55540144 | 0.588 | 0.054 | 6.5E-162 | 37 | UGCG     | Immune/Plasmacytoid DCs |
| 9.815E-133 | 0.23480039 | 0.235 | 0.011 | 2E-128   | 37 | RUNX2    | Immune/Plasmacytoid DCs |
| 4.34E-101  | 0.30484087 | 0.25  | 0.016 | 8.77E-97 | 37 | PTPRS    | Immune/Plasmacytoid DCs |
| 1.783E-120 | 0.54314501 | 0.551 | 0.064 | 3.6E-116 | 37 | ALOX5AP  | Immune/Plasmacytoid DCs |
| 1.308E-121 | 0.39212159 | 0.426 | 0.038 | 2.6E-117 | 37 | GPR183   | Immune/Plasmacytoid DCs |
| 8.511E-103 | 0.60788399 | 0.603 | 0.089 | 1.72E-98 | 37 | TCF4     | Immune/Plasmacytoid DCs |
| 1.6092E-50 | 0.52458816 | 0.426 | 0.08  | 3.25E-46 | 37 | AREG     | Immune/Plasmacytoid DCs |
| 1.6774E-71 | 0.30522786 | 0.331 | 0.038 | 3.39E-67 | 37 | CCDC50   | Immune/Plasmacytoid DCs |
| 5.398E-68  | 0.21423129 | 0.228 | 0.019 | 1.09E-63 | 37 | SELL     | Immune/Plasmacytoid DCs |
| 4.0381E-64 | 0.68774848 | 0.765 | 0.215 | 8.16E-60 | 37 | CXCR4    | Immune/Plasmacytoid DCs |
| 1.7795E-67 | 0.22659192 | 0.257 | 0.024 | 3.6E-63  | 37 | DCK      | Immune/Plasmacytoid DCs |
| 1.1259E-66 | 0.38947083 | 0.485 | 0.081 | 2.28E-62 | 37 | C12orf75 | Immune/Plasmacytoid DCs |
| 3.1196E-50 | 0.43874639 | 0.5   | 0.11  | 6.3E-46  | 37 | SEC61B   | Immune/Plasmacytoid DCs |
| 4.7253E-49 | 0.28748992 | 0.316 | 0.047 | 9.55E-45 | 37 | RNASE6   | Immune/Plasmacytoid DCs |
| 4.7854E-55 | 0.26187741 | 0.316 | 0.043 | 9.67E-51 | 37 | PTPRE    | Immune/Plasmacytoid DCs |
| 7.4368E-40 | 0.52104827 | 0.544 | 0.151 | 1.5E-35  | 37 | RGS1     | Immune/Plasmacytoid DCs |

|            |            |       |       |          |    |          |                         |
|------------|------------|-------|-------|----------|----|----------|-------------------------|
| 1.0137E-46 | 0.2347733  | 0.265 | 0.035 | 2.05E-42 | 37 | PRMT9    | Immune/Plasmacytoid DCs |
| 4.3186E-23 | 0.33635231 | 0.213 | 0.042 | 8.73E-19 | 37 | PTGDS    | Immune/Plasmacytoid DCs |
| 6.0544E-19 | 0.55032489 | 0.456 | 0.178 | 1.22E-14 | 37 | TXN      | Immune/Plasmacytoid DCs |
| 1.4544E-32 | 0.3662541  | 0.434 | 0.117 | 2.94E-28 | 37 | SPCS1    | Immune/Plasmacytoid DCs |
| 4.5987E-33 | 0.32901484 | 0.39  | 0.095 | 9.29E-29 | 37 | CD164    | Immune/Plasmacytoid DCs |
| 2.6196E-34 | 0.50627601 | 0.838 | 0.357 | 5.29E-30 | 37 | CD74     | Immune/Plasmacytoid DCs |
| 7.8819E-28 | 0.37110534 | 0.574 | 0.202 | 1.59E-23 | 37 | GPX1     | Immune/Plasmacytoid DCs |
| 6.6194E-26 | 0.20189741 | 0.235 | 0.046 | 1.34E-21 | 37 | C9orf142 | Immune/Plasmacytoid DCs |
| 7.9856E-26 | 0.2461494  | 0.316 | 0.077 | 1.61E-21 | 37 | YPEL5    | Immune/Plasmacytoid DCs |
| 5.3384E-22 | 0.20216299 | 0.213 | 0.044 | 1.08E-17 | 37 | DDIT4    | Immune/Plasmacytoid DCs |
| 7.1079E-24 | 0.38409558 | 0.588 | 0.242 | 1.44E-19 | 37 | SEC61G   | Immune/Plasmacytoid DCs |
| 9.1889E-27 | 0.54595945 | 0.868 | 0.529 | 1.86E-22 | 37 | RPS3A    | Immune/Plasmacytoid DCs |
| 6.0204E-20 | 0.25529772 | 0.434 | 0.147 | 1.22E-15 | 37 | FCER1G   | Immune/Plasmacytoid DCs |
| 2.3878E-27 | 0.54103098 | 0.934 | 0.692 | 4.83E-23 | 37 | RPS8     | Immune/Plasmacytoid DCs |
| 6.1818E-16 | 0.3494385  | 0.588 | 0.289 | 1.25E-11 | 37 | CYBA     | Immune/Plasmacytoid DCs |
| 3.0163E-16 | 0.24042335 | 0.331 | 0.113 | 6.1E-12  | 37 | HERPUD1  | Immune/Plasmacytoid DCs |
| 1.5399E-19 | 0.40305736 | 0.794 | 0.468 | 3.11E-15 | 37 | RPS13    | Immune/Plasmacytoid DCs |
| 5.9317E-15 | 0.21436017 | 0.279 | 0.089 | 1.2E-10  | 37 | RGS2     | Immune/Plasmacytoid DCs |
| 5.2612E-15 | 0.26658452 | 0.478 | 0.21  | 1.06E-10 | 37 | SUB1     | Immune/Plasmacytoid DCs |
| 4.2827E-22 | 0.25120953 | 0.787 | 0.328 | 8.65E-18 | 37 | HLA-DRA  | Immune/Plasmacytoid DCs |
| 6.6877E-13 | 0.2786095  | 0.441 | 0.205 | 1.35E-08 | 37 | ZFP36L2  | Immune/Plasmacytoid DCs |
| 3.7209E-15 | 0.30626079 | 0.603 | 0.309 | 7.52E-11 | 37 | RPL23    | Immune/Plasmacytoid DCs |
| 2.742E-14  | 0.20034056 | 0.301 | 0.103 | 5.54E-10 | 37 | MEF2C    | Immune/Plasmacytoid DCs |
| 2.5519E-15 | 0.32369876 | 0.787 | 0.458 | 5.16E-11 | 37 | RPL19    | Immune/Plasmacytoid DCs |
| 2.7545E-13 | 0.28695227 | 0.676 | 0.372 | 5.57E-09 | 37 | PABPC1   | Immune/Plasmacytoid DCs |
| 1.2871E-11 | 0.36174145 | 0.831 | 0.583 | 2.6E-07  | 37 | FOS      | Immune/Plasmacytoid DCs |
| 4.887E-13  | 0.32820975 | 0.831 | 0.575 | 9.88E-09 | 37 | RPS23    | Immune/Plasmacytoid DCs |
| 4.0538E-10 | 0.30458419 | 0.713 | 0.463 | 8.19E-06 | 37 | HSP90AA1 | Immune/Plasmacytoid DCs |
| 6.1474E-13 | 0.27685775 | 0.728 | 0.449 | 1.24E-08 | 37 | RPS4X    | Immune/Plasmacytoid DCs |
| 3.728E-11  | 0.20679912 | 0.449 | 0.207 | 7.53E-07 | 37 | NPC2     | Immune/Plasmacytoid DCs |
| 4.71E-18   | 0.36563045 | 0.941 | 0.771 | 9.52E-14 | 37 | RPS27A   | Immune/Plasmacytoid DCs |
| 2.7378E-14 | 0.30557254 | 0.875 | 0.6   | 5.53E-10 | 37 | RPS15A   | Immune/Plasmacytoid DCs |
| 8.6361E-11 | 0.2211169  | 0.478 | 0.241 | 1.75E-06 | 37 | MYL12A   | Immune/Plasmacytoid DCs |
| 9.789E-11  | 0.27765575 | 0.691 | 0.439 | 1.98E-06 | 37 | RPL9     | Immune/Plasmacytoid DCs |
| 7.5817E-10 | 0.21470246 | 0.397 | 0.196 | 1.53E-05 | 37 | COMMD6   | Immune/Plasmacytoid DCs |
| 2.4554E-21 | 0.39453446 | 0.993 | 0.907 | 4.96E-17 | 37 | RPL21    | Immune/Plasmacytoid DCs |
| 1.2291E-22 | 0.40090308 | 1     | 0.946 | 2.48E-18 | 37 | RPS27    | Immune/Plasmacytoid DCs |
| 6.8241E-11 | 0.28824304 | 0.801 | 0.547 | 1.38E-06 | 37 | RPL11    | Immune/Plasmacytoid DCs |
| 5.8032E-09 | 0.27619952 | 0.654 | 0.431 | 0.000117 | 37 | H3F3B    | Immune/Plasmacytoid DCs |
| 8.2341E-12 | 0.28473447 | 0.801 | 0.547 | 1.66E-07 | 37 | RPL23A   | Immune/Plasmacytoid DCs |
| 2.7753E-11 | 0.21991247 | 0.596 | 0.319 | 5.61E-07 | 37 | RPL30    | Immune/Plasmacytoid DCs |
| 2.5732E-11 | 0.2722694  | 0.853 | 0.584 | 5.2E-07  | 37 | RPL26    | Immune/Plasmacytoid DCs |
| 7.4916E-09 | 0.24992297 | 0.699 | 0.446 | 0.000151 | 37 | RPL6     | Immune/Plasmacytoid DCs |
| 6.7629E-17 | 0.35223134 | 0.963 | 0.871 | 1.37E-12 | 37 | RPL39    | Immune/Plasmacytoid DCs |
| 7.9223E-10 | 0.26841155 | 0.757 | 0.523 | 1.6E-05  | 37 | RPS24    | Immune/Plasmacytoid DCs |
| 1.6573E-08 | 0.21783061 | 0.478 | 0.269 | 0.000335 | 37 | JUND     | Immune/Plasmacytoid DCs |
| 1.6384E-12 | 0.2900468  | 0.89  | 0.668 | 3.31E-08 | 37 | RPS28    | Immune/Plasmacytoid DCs |
| 5.7418E-10 | 0.26569063 | 0.801 | 0.555 | 1.16E-05 | 37 | RPL18A   | Immune/Plasmacytoid DCs |

|            |            |       |       |          |    |         |                         |
|------------|------------|-------|-------|----------|----|---------|-------------------------|
| 1.2482E-09 | 0.25976294 | 0.728 | 0.501 | 2.52E-05 | 37 | RPL27A  | Immune/Plasmacytoid DCs |
| 1.8993E-19 | 0.35860359 | 0.993 | 0.947 | 3.84E-15 | 37 | RPL34   | Immune/Plasmacytoid DCs |
| 1.1244E-08 | 0.21984485 | 0.588 | 0.351 | 0.000227 | 37 | RPL27   | Immune/Plasmacytoid DCs |
| 4.9875E-14 | 0.31119272 | 0.956 | 0.813 | 1.01E-09 | 37 | RPS18   | Immune/Plasmacytoid DCs |
| 1.0019E-08 | 0.21264499 | 0.574 | 0.336 | 0.000202 | 37 | RPL10A  | Immune/Plasmacytoid DCs |
| 3.9003E-06 | 0.22799507 | 0.478 | 0.302 | 0.078817 | 37 | KLF6    | Immune/Plasmacytoid DCs |
| 1.8754E-08 | 0.22216975 | 0.61  | 0.379 | 0.000379 | 37 | H3F3A   | Immune/Plasmacytoid DCs |
| 8.4076E-09 | 0.23025823 | 0.706 | 0.463 | 0.00017  | 37 | RPS17   | Immune/Plasmacytoid DCs |
| 1.7588E-08 | 0.22121264 | 0.662 | 0.425 | 0.000355 | 37 | RPL15   | Immune/Plasmacytoid DCs |
| 9.7206E-11 | 0.29392381 | 0.919 | 0.784 | 1.96E-06 | 37 | RPL10   | Immune/Plasmacytoid DCs |
| 1.0545E-08 | 0.23259837 | 0.728 | 0.494 | 0.000213 | 37 | RPL7    | Immune/Plasmacytoid DCs |
| 1.6461E-08 | 0.22670828 | 0.721 | 0.478 | 0.000333 | 37 | RPS2    | Immune/Plasmacytoid DCs |
| 1.8057E-06 | 0.20015199 | 0.441 | 0.262 | 0.03649  | 37 | FOSB    | Immune/Plasmacytoid DCs |
| 6.7495E-09 | 0.25335084 | 0.809 | 0.609 | 0.000136 | 37 | RPS12   | Immune/Plasmacytoid DCs |
| 4.7711E-08 | 0.20828359 | 0.625 | 0.391 | 0.000964 | 37 | RPL37   | Immune/Plasmacytoid DCs |
| 1.9895E-08 | 0.20981131 | 0.647 | 0.415 | 0.000402 | 37 | RPS20   | Immune/Plasmacytoid DCs |
| 1.4275E-07 | 0.20953497 | 0.566 | 0.364 | 0.002885 | 37 | RPS11   | Immune/Plasmacytoid DCs |
| 2.8495E-07 | 0.22871278 | 0.728 | 0.519 | 0.005758 | 37 | RPL35A  | Immune/Plasmacytoid DCs |
| 6.3393E-08 | 0.21597773 | 0.809 | 0.565 | 0.001281 | 37 | TPT1    | Immune/Plasmacytoid DCs |
| 2.2514E-07 | 0.22034436 | 0.794 | 0.591 | 0.00455  | 37 | RPLP2   | Immune/Plasmacytoid DCs |
| 1.6148E-06 | 0.20836715 | 0.662 | 0.47  | 0.032631 | 37 | RPL3    | Immune/Plasmacytoid DCs |
| 1.5241E-10 | 0.23815696 | 0.941 | 0.794 | 3.08E-06 | 37 | RPL13A  | Immune/Plasmacytoid DCs |
| 1.5511E-06 | 0.22585133 | 0.787 | 0.63  | 0.031345 | 37 | RPL35   | Immune/Plasmacytoid DCs |
| 1.052E-08  | 0.23316452 | 0.941 | 0.803 | 0.000213 | 37 | RPS19   | Immune/Plasmacytoid DCs |
| 2.2983E-09 | 0.2168301  | 0.934 | 0.764 | 4.64E-05 | 37 | RPL32   | Immune/Plasmacytoid DCs |
| 4.7528E-09 | 0.21520946 | 0.934 | 0.821 | 9.6E-05  | 37 | RPL13   | Immune/Plasmacytoid DCs |
| 2.3174E-08 | -0.375989  | 0     | 0.189 | 0.000468 | 37 | CLU     | Immune/Plasmacytoid DCs |
| 3.4923E-10 | -0.3121117 | 0.007 | 0.238 | 7.06E-06 | 37 | IFITM3  | Immune/Plasmacytoid DCs |
| 0.00021098 | -0.2226907 | 0.007 | 0.104 | 1        | 37 | CTGF    | Immune/Plasmacytoid DCs |
| 6.1667E-06 | -0.2257743 | 0.015 | 0.156 | 0.124618 | 37 | HES1    | Immune/Plasmacytoid DCs |
| 5.0259E-09 | -0.3368667 | 0.029 | 0.245 | 0.000102 | 37 | IGFBP7  | Immune/Plasmacytoid DCs |
| 9.5719E-06 | -0.3092797 | 0.029 | 0.171 | 0.193428 | 37 | DEFB1   | Immune/Plasmacytoid DCs |
| 4.9075E-08 | -0.3989608 | 0.037 | 0.231 | 0.000992 | 37 | ATP1B1  | Immune/Plasmacytoid DCs |
| 4.0167E-06 | -0.275449  | 0.051 | 0.211 | 0.081169 | 37 | FXD2    | Immune/Plasmacytoid DCs |
| 0.00284216 | -0.2640491 | 0.029 | 0.107 | 1        | 37 | IGFBP5  | Immune/Plasmacytoid DCs |
| 0.00101461 | -0.2474021 | 0.051 | 0.152 | 1        | 37 | LYZ     | Immune/Plasmacytoid DCs |
| 0.00013769 | -0.2873589 | 0.051 | 0.17  | 1        | 37 | WFDC2   | Immune/Plasmacytoid DCs |
| 0.00271018 | -0.2423635 | 0.051 | 0.14  | 1        | 37 | TIMP1   | Immune/Plasmacytoid DCs |
| 0.00050709 | -0.225987  | 0.081 | 0.193 | 1        | 37 | AIF1    | Immune/Plasmacytoid DCs |
| 2.431E-13  | -0.657345  | 0.059 | 0.358 | 4.91E-09 | 37 | MT2A    | Immune/Plasmacytoid DCs |
| 5.0726E-06 | -0.378519  | 0.066 | 0.222 | 0.102507 | 37 | ADIRF   | Immune/Plasmacytoid DCs |
| 3.8607E-08 | -0.3399838 | 0.199 | 0.413 | 0.00078  | 37 | ITM2B   | Immune/Plasmacytoid DCs |
| 0.00136323 | -0.2841223 | 0.169 | 0.279 | 1        | 37 | LGALS1  | Immune/Plasmacytoid DCs |
| 8.8801E-06 | -0.5122372 | 0.11  | 0.267 | 0.179448 | 37 | SPP1    | Immune/Plasmacytoid DCs |
| 0.00231797 | -0.2855309 | 0.346 | 0.417 | 1        | 37 | SAT1    | Immune/Plasmacytoid DCs |
| 8.3158E-11 | -0.3944438 | 0.456 | 0.694 | 1.68E-06 | 37 | NEAT1   | Immune/Plasmacytoid DCs |
| 3.5683E-06 | -0.4011984 | 0.301 | 0.456 | 0.072107 | 37 | S100A6  | Immune/Plasmacytoid DCs |
| 0.00091908 | -0.3255904 | 0.801 | 0.793 | 1        | 37 | MT-ND4L | Immune/Plasmacytoid DCs |

|            |            |       |       |          |    |         |                         |
|------------|------------|-------|-------|----------|----|---------|-------------------------|
| 2.3667E-20 | -1.0964794 | 0.485 | 0.167 | 4.78E-16 | 37 | IGKC    | Immune/Plasmacytoid DCs |
| 0          | 0.22100196 | 0.158 | 0     | 0        | 38 | ADCYAP1 | Immune/Basophils        |
| 0          | 0.76459748 | 0.436 | 0     | 0        | 38 | CPA3    | Immune/Basophils        |
| 0          | 0.32640233 | 0.297 | 0     | 0        | 38 | MS4A2   | Immune/Basophils        |
| 0          | 0.22098203 | 0.208 | 0     | 0        | 38 | SLC18A2 | Immune/Basophils        |
| 0          | 1.34302519 | 0.683 | 0     | 0        | 38 | TPSAB1  | Immune/Basophils        |
| 0          | 1.43179336 | 0.762 | 0     | 0        | 38 | TPSB2   | Immune/Basophils        |
| 0          | 0.22010562 | 0.158 | 0.001 | 0        | 38 | HPGDS   | Immune/Basophils        |
| 6.593E-237 | 0.42036395 | 0.297 | 0.007 | 1.3E-232 | 38 | KIT     | Immune/Basophils        |
| 7.2494E-17 | 0.25601327 | 0.149 | 0.023 | 1.46E-12 | 38 | PTGS2   | Immune/Basophils        |
| 1.9257E-09 | 0.54908298 | 0.238 | 0.08  | 3.89E-05 | 38 | AREG    | Immune/Basophils        |
| 6.1542E-18 | 0.50433267 | 0.406 | 0.131 | 1.24E-13 | 38 | CD69    | Immune/Basophils        |
| 2.0844E-20 | 0.30043706 | 0.287 | 0.065 | 4.21E-16 | 38 | ALOX5AP | Immune/Basophils        |
| 1.7949E-13 | 0.42090406 | 0.406 | 0.152 | 3.63E-09 | 38 | RGS1    | Immune/Basophils        |
| 3.2273E-17 | 0.22905845 | 0.248 | 0.056 | 6.52E-13 | 38 | SAMSN1  | Immune/Basophils        |
| 1.3758E-07 | 0.32558699 | 0.366 | 0.186 | 0.00278  | 38 | LAPTM4A | Immune/Basophils        |
| 1.2669E-09 | 0.21296774 | 0.307 | 0.117 | 2.56E-05 | 38 | ANXA1   | Immune/Basophils        |
| 2.018E-07  | 0.21761763 | 0.327 | 0.146 | 0.004078 | 38 | CD9     | Immune/Basophils        |
| 2.7102E-05 | 0.2931063  | 0.455 | 0.292 | 0.547668 | 38 | SRGN    | Immune/Basophils        |
| 0.00048985 | 0.21902978 | 0.564 | 0.432 | 1        | 38 | H3F3B   | Immune/Basophils        |
| 6.6622E-05 | 0.26254676 | 0.911 | 0.846 | 1        | 38 | PTMA    | Immune/Basophils        |
| 4.6654E-06 | 0.25591531 | 0.921 | 0.871 | 0.094278 | 38 | RPL39   | Immune/Basophils        |
| 2.5424E-05 | 0.25148918 | 1     | 0.997 | 0.513763 | 38 | MALAT1  | Immune/Basophils        |
| 0.00021504 | -0.2515668 | 0.089 | 0.245 | 1        | 38 | IGFBP7  | Immune/Basophils        |
| 0.00582921 | -0.230097  | 0.069 | 0.17  | 1        | 38 | WFDC2   | Immune/Basophils        |

Cell-type established markers used for the study

| Cell type                              | Marker gene     | Reference                                         |
|----------------------------------------|-----------------|---------------------------------------------------|
| Podocyte                               | PODXL           | Kershaw et al, 1997, J of Biol Chem               |
|                                        | NPHS2           | Roselli et al, 2002, Am J of Pathol               |
| Glomerular mesangial cells             | <i>TAGLN</i>    | Daniel et al, 2012, Lab Invest.                   |
| Proximal tubule                        | <i>ALDOB</i>    | Chabardes-Garonne et al. 2003. Proc Natl Acad Sci |
|                                        | <i>PDZK1IP1</i> | Human protein atlas                               |
| Proximal tubule-S1                     | <i>SLC5A12</i>  | Lee et al. 2015 J Am Soc of Neph                  |
| Distal convoluted tubule               | <i>SLC12A3</i>  | Biner et al. 2002. J Am Soc of Neph               |
| Principal cells                        | <i>AQP2</i>     | Lee et al. 2015 J Am Soc of Neph                  |
|                                        | <i>AQP3</i>     | Ishibashi et al. 1994. Proc Natl Acad Sci         |
|                                        | <i>FXYP4</i>    | Lee et al. 2015 J Am Soc of Neph                  |
| Type A intercalated cells              | <i>SLC4A1</i>   | Roy et al. 2015. Clin J of Am Soc of Neph         |
|                                        | <i>AQP6</i>     | Lee et al. 2015 J Am Soc of Neph                  |
| Connecting tubule                      | <i>CALB1</i>    | Lee et al. 2015 J Am Soc of Neph                  |
| Thick ascending limb                   | <i>UMOD</i>     | Hession et al. 1987. Science                      |
|                                        | <i>SLC12A1</i>  | Lee et al. 2015 J Am Soc of Neph                  |
| Endothelial cells                      | <i>VWF</i>      | Pusztaszeri et al. 2006. J His Chem               |
|                                        | <i>PECAM-1</i>  | Brunskill et al. 2014. Development                |
|                                        | <i>CD34</i>     | Lin et al. 1995. Eur J Immunol.                   |
|                                        | <i>EMCN</i>     | Brunskill et al. 2014. Development                |
| Vascular smooth muscle cells/pericytes | <i>ACTA2</i>    | Carey et al. 1992. Hypertension                   |
| B cells                                | <i>MZB1</i>     | Stewart et al. 2019. Science                      |
| Macrophages                            | <i>CD163</i>    | Stewart et al. 2019. Science                      |
|                                        | <i>LYZ</i>      | Stewart et al. 2019. Science                      |
|                                        | <i>C1qA/B</i>   | Human protein atlas                               |
| T cells                                | <i>CD3D</i>     | Stewart et al. 2019. Science                      |
|                                        | <i>CD69</i>     | Stewart et al. 2019. Science                      |
| NK cells                               | <i>GNLY</i>     | Stewart et al. 2019. Science                      |
|                                        | <i>NKG7</i>     | Stewart et al. 2019. Science                      |
|                                        | <i>KLRB1</i>    | Stewart et al. 2019. Science                      |
|                                        | <i>IL32</i>     | Stewart et al. 2019. Science                      |
| Neutrophils                            | <i>S100A8</i>   | Stewart et al. 2019. Science                      |
|                                        | <i>S100A9</i>   | Stewart et al. 2019. Science                      |
| Dendritic cells/APCs                   | <i>FCER1A</i>   | Stewart et al. 2019. Science                      |
|                                        | <i>HLA-DPB1</i> | Stewart et al. 2019. Science                      |
|                                        | <i>HLA-DRB1</i> | Stewart et al. 2019. Science                      |
| Myeloid dendritic cells                | <i>CD1E</i>     | Human protein atlas                               |
| Plasmacytoid dendritic cells           | <i>LILRA4</i>   | Stewart et al. 2019. Science                      |
|                                        | <i>CLIC3</i>    | Stewart et al. 2019. Science                      |
| Basophils                              | <i>MS4A2</i>    | Stewart et al. 2019. Science                      |
|                                        | <i>CPA3</i>     | Stewart et al. 2019. Science                      |
|                                        | <i>SLC18A2</i>  | Stewart et al. 2019. Science                      |
