# Supplementary material
Source: PubMed Central journal article supplement (PMC8897263)
Supplement: NIHMS1750417-supplement-St3.pdf [file NIHMS1750417-supplement-St3.pdf]

Table S3: Differential gene expression between cells from transplant and normal explants

| p_val    | avg_logFC | pct.1 | pct.2 | p_val_adj | Gene    | description                                                                               |
|----------|-----------|-------|-------|-----------|---------|-------------------------------------------------------------------------------------------|
| 3.3E-169 | 0.8894803 | 0.214 | 0.123 | 6.7E-165  | IGKC    | immunoglobulin kappa constant [Source:HGNC Symbol;Acc:HGNC:5716]                          |
| 2.17E-89 | 0.7631042 | 0.083 | 0.04  | 4.38E-85  | IGLC3   | immunoglobulin lambda constant 3 (Kern-Oz+ marker) [Source:HGNC Symbol;Acc:HGNC:5857]     |
| 3.08E-75 | 0.7574415 | 0.105 | 0.06  | 6.22E-71  | IGLC2   | immunoglobulin lambda constant 2 [Source:HGNC Symbol;Acc:HGNC:5856]                       |
| 0        | 0.555695  | 0.726 | 0.68  | 0         | FTL     | ferritin light chain [Source:HGNC Symbol;Acc:HGNC:3999]                                   |
| 5E-133   | 0.5265941 | 0.114 | 0.054 | 1E-128    | IGHG1   | immunoglobulin heavy constant gamma 1 (G1m marker) [Source:HGNC Symbol;Acc:HGNC:5525]     |
| 0        | 0.44696   | 0.973 | 0.937 | 0         | B2M     | beta-2-microglobulin [Source:HGNC Symbol;Acc:HGNC:914]                                    |
| 5.5E-109 | 0.4353888 | 0.103 | 0.051 | 1.1E-104  | IGHG3   | immunoglobulin heavy constant gamma 3 (G3m marker) [Source:HGNC Symbol;Acc:HGNC:5527]     |
| 0        | 0.3291331 | 0.658 | 0.51  | 0         | FOS     | Fos proto-oncogene, AP-1 transcription factor subunit [Source:HGNC Symbol;Acc:HGNC:3796]  |
| 0        | 0.3054745 | 0.912 | 0.862 | 0         | TMSB4X  | thymosin beta 4 X-linked [Source:HGNC Symbol;Acc:HGNC:11881]                              |
| 0        | 0.2889847 | 0.417 | 0.243 | 0         | HLA-DRA | major histocompatibility complex, class II, DR alpha [Source:HGNC Symbol;Acc:HGNC:4947]   |
| 0        | 0.2815273 | 0.407 | 0.18  | 0         | SRGN    | serglycin [Source:HGNC Symbol;Acc:HGNC:9361]                                              |
| 0        | 0.2805305 | 0.486 | 0.292 | 0         | DUSP1   | dual specificity phosphatase 1 [Source:HGNC Symbol;Acc:HGNC:3064]                         |
| 0        | 0.2683295 | 0.712 | 0.603 | 0         | ACTB    | actin beta [Source:HGNC Symbol;Acc:HGNC:132]                                              |
| 0        | 0.2636595 | 0.893 | 0.851 | 0         | RPL39   | ribosomal protein L39 [Source:HGNC Symbol;Acc:HGNC:10350]                                 |
| 0        | 0.228638  | 0.223 | 0.092 | 0         | CCL5    | C-C motif chemokine ligand 5 [Source:HGNC Symbol;Acc:HGNC:10632]                          |
| 2.3E-101 | 0.2159986 | 0.605 | 0.53  | 4.7E-97   | FTH1    | ferritin heavy chain 1 [Source:HGNC Symbol;Acc:HGNC:3976]                                 |
| 2.1E-260 | 0.2150714 | 0.208 | 0.097 | 4.2E-256  | LYZ     | lysozyme [Source:HGNC Symbol;Acc:HGNC:6740]                                               |
| 0        | 0.211745  | 0.587 | 0.403 | 0         | RPS26   | ribosomal protein S26 [Source:HGNC Symbol;Acc:HGNC:10414]                                 |
| 9.6E-267 | 0.2106103 | 0.175 | 0.074 | 1.9E-262  | C1QA    | complement C1q A chain [Source:HGNC Symbol;Acc:HGNC:1241]                                 |
| 0        | 0.2038137 | 0.681 | 0.522 | 0         | RPS15A  | ribosomal protein S15a [Source:HGNC Symbol;Acc:HGNC:10389]                                |
| 3.3E-202 | 0.2034218 | 0.807 | 0.78  | 6.6E-198  | TMSB10  | thymosin beta 10 [Source:HGNC Symbol;Acc:HGNC:11879]                                      |
| 0        | 0.2016584 | 0.678 | 0.512 | 0         | RPL28   | ribosomal protein L28 [Source:HGNC Symbol;Acc:HGNC:10330]                                 |
| 0        | 0.1957278 | 0.649 | 0.484 | 0         | TPT1    | tumor protein, translationally-controlled 1 [Source:HGNC Symbol;Acc:HGNC:12022]           |
| 7E-233   | 0.1951859 | 0.178 | 0.081 | 1.4E-228  | CXCL2   | C-X-C motif chemokine ligand 2 [Source:HGNC Symbol;Acc:HGNC:4603]                         |
| 3.7E-300 | 0.1936622 | 0.249 | 0.122 | 7.6E-296  | TYROBP  | TYRO protein tyrosine kinase binding protein [Source:HGNC Symbol;Acc:HGNC:12449]          |
| 8.5E-262 | 0.18995   | 0.556 | 0.403 | 1.7E-257  | RPS2    | ribosomal protein S2 [Source:HGNC Symbol;Acc:HGNC:10404]                                  |
| 0        | 0.1893083 | 0.369 | 0.213 | 0         | CYBA    | cytochrome b-245 alpha chain [Source:HGNC Symbol;Acc:HGNC:2577]                           |
| 1.2E-270 | 0.1850882 | 0.636 | 0.478 | 2.5E-266  | RPL18A  | ribosomal protein L18a [Source:HGNC Symbol;Acc:HGNC:10311]                                |
| 3.4E-192 | 0.1841041 | 0.423 | 0.295 | 7E-188    | CD74    | CD74 molecule [Source:HGNC Symbol;Acc:HGNC:1697]                                          |
| 7.1E-191 | 0.1787702 | 0.817 | 0.79  | 1.4E-186  | RPS19   | ribosomal protein S19 [Source:HGNC Symbol;Acc:HGNC:10402]                                 |
| 1E-285   | 0.1785209 | 0.334 | 0.194 | 2.1E-281  | ZFP36   | ZFP36 ring finger protein [Source:HGNC Symbol;Acc:HGNC:12862]                             |
| 0        | 0.178126  | 0.225 | 0.094 | 0         | CD52    | CD52 molecule [Source:HGNC Symbol;Acc:HGNC:1804]                                          |
| 3.4E-240 | 0.1767104 | 0.251 | 0.135 | 6.8E-236  | AIF1    | allograft inflammatory factor 1 [Source:HGNC Symbol;Acc:HGNC:352]                         |
| 7.6E-158 | 0.1764949 | 0.333 | 0.226 | 1.5E-153  | LGALS1  | galectin 1 [Source:HGNC Symbol;Acc:HGNC:6561]                                             |
| 0        | 0.1708449 | 0.316 | 0.164 | 0         | SH3BGR1 | SH3 domain binding glutamate rich protein like 3 [Source:HGNC Symbol;Acc:HGNC:15568]      |
| 8.1E-298 | 0.168382  | 0.285 | 0.149 | 1.6E-293  | CXCR4   | C-X-C motif chemokine receptor 4 [Source:HGNC Symbol;Acc:HGNC:2561]                       |
| 1.2E-266 | 0.1644562 | 0.204 | 0.094 | 2.5E-262  | FCER1G  | Fc fragment of IgE receptor Ig [Source:HGNC Symbol;Acc:HGNC:3611]                         |
| 3E-221   | 0.1638193 | 0.149 | 0.063 | 6.1E-217  | C1QB    | complement C1q B chain [Source:HGNC Symbol;Acc:HGNC:1242]                                 |
| 3.3E-259 | 0.1625871 | 0.286 | 0.16  | 6.7E-255  | NFKBIA  | NF-kappa-B inhibitor alpha [Source:HGNC Symbol;Acc:HGNC:7797]                             |
| 2.4E-238 | 0.1571844 | 0.506 | 0.359 | 4.8E-234  | H3F3B   |                                                                                           |
| 1.7E-186 | 0.156396  | 0.905 | 0.91  | 3.5E-182  | RPL21   | ribosomal protein L21 [Source:HGNC Symbol;Acc:HGNC:10313]                                 |
| 3.5E-283 | 0.1560494 | 0.366 | 0.22  | 7.1E-279  | PFN1    | profilin 1 [Source:HGNC Symbol;Acc:HGNC:8881]                                             |
| 1.1E-196 | 0.1546742 | 0.597 | 0.465 | 2.2E-192  | RPS3A   | ribosomal protein S3A [Source:HGNC Symbol;Acc:HGNC:10421]                                 |
| 9.8E-238 | 0.1532522 | 0.329 | 0.199 | 2E-233    | FOSB    | FosB proto-oncogene, AP-1 transcription factor subunit [Source:HGNC Symbol;Acc:HGNC:3797] |
| 1.9E-229 | 0.1523177 | 0.292 | 0.17  | 3.9E-225  | S100A4  | S100 calcium binding protein A4 [Source:HGNC Symbol;Acc:HGNC:10494]                       |
| 2.7E-229 | 0.1516298 | 0.338 | 0.21  | 5.6E-225  | BTG1    | BTG anti-proliferation factor 1 [Source:HGNC Symbol;Acc:HGNC:1130]                        |
| 1.3E-131 | 0.1514903 | 0.793 | 0.777 | 2.7E-127  | RPL10   | ribosomal protein L10 [Source:HGNC Symbol;Acc:HGNC:10298]                                 |
| 8.52E-62 | 0.1499131 | 0.698 | 0.688 | 1.72E-57  | NEAT1   | nuclear paraspeckle assembly transcript 1 [Source:HGNC Symbol;Acc:HGNC:30815]             |
| 4.4E-203 | 0.1487742 | 0.442 | 0.304 | 8.9E-199  | PABPC1  | poly(A) binding protein cytoplasmic 1 [Source:HGNC Symbol;Acc:HGNC:8554]                  |
| 1.5E-158 | 0.1472677 | 0.831 | 0.811 | 2.9E-154  | RPL13   | ribosomal protein L13 [Source:HGNC Symbol;Acc:HGNC:10303]                                 |
| 8.2E-199 | 0.1472207 | 0.313 | 0.198 | 1.6E-194  | VIM     | vimentin [Source:HGNC Symbol;Acc:HGNC:12692]                                              |
| 5.1E-147 | 0.1469428 | 0.815 | 0.791 | 1E-142    | RPLP1   | ribosomal protein lateral stalk subunit P1 [Source:HGNC Symbol;Acc:HGNC:10372]            |
| 2.9E-201 | 0.1453416 | 0.262 | 0.154 | 5.9E-197  | NPC2    | NPC intracellular cholesterol transporter 2 [Source:HGNC Symbol;Acc:HGNC:14537]           |
| 1.1E-146 | 0.144171  | 0.094 | 0.037 | 2.3E-142  | S100A8  | S100 calcium binding protein A8 [Source:HGNC Symbol;Acc:HGNC:10498]                       |
| 3.1E-191 | 0.1437282 | 0.152 | 0.07  | 6.2E-187  | CCL4    | C-C motif chemokine ligand 4 [Source:HGNC Symbol;Acc:HGNC:10630]                          |
| 2.7E-223 | 0.1411895 | 0.127 | 0.047 | 5.5E-219  | S100A9  | S100 calcium binding protein A9 [Source:HGNC Symbol;Acc:HGNC:10499]                       |
| 2.8E-156 | 0.1398318 | 0.652 | 0.533 | 5.7E-152  | RPLP2   | ribosomal protein lateral stalk subunit P2 [Source:HGNC Symbol;Acc:HGNC:10377]            |
| 2.5E-158 | 0.1390258 | 0.484 | 0.367 | 5.1E-154  | RPS3    | ribosomal protein S3 [Source:HGNC Symbol;Acc:HGNC:10420]                                  |
| 7.6E-161 | 0.1357175 | 0.115 | 0.05  | 1.5E-156  | VWF     | von Willebrand factor [Source:HGNC Symbol;Acc:HGNC:12726]                                 |
| 2.9E-175 | 0.1356778 | 0.569 | 0.436 | 5.9E-171  | RPL27A  | ribosomal protein L27a [Source:HGNC Symbol;Acc:HGNC:10329]                                |
| 1.2E-285 | 0.1347131 | 0.196 | 0.085 | 2.4E-281  | NR4A2   | nuclear receptor subfamily 4 group A member 2 [Source:HGNC Symbol;Acc:HGNC:7981]          |
| 4.5E-136 | 0.1345725 | 0.641 | 0.53  | 9E-132    | RPL26   | ribosomal protein L26 [Source:HGNC Symbol;Acc:HGNC:10327]                                 |
| 1.5E-169 | 0.1344983 | 0.149 | 0.071 | 3E-165    | CCL3    | C-C motif chemokine ligand 3 [Source:HGNC Symbol;Acc:HGNC:10627]                          |
| 1.2E-268 | 0.1342575 | 0.184 | 0.079 | 2.5E-264  | CTSS    | cathepsin S [Source:HGNC Symbol;Acc:HGNC:2545]                                            |
| 2.9E-123 | 0.1339159 | 0.662 | 0.559 | 5.8E-119  | RPS12   | ribosomal protein S12 [Source:HGNC Symbol;Acc:HGNC:10385]                                 |
| 2.5E-171 | 0.1312782 | 0.534 | 0.406 | 5.1E-167  | RPS13   | ribosomal protein S13 [Source:HGNC Symbol;Acc:HGNC:10386]                                 |
| 1.9E-227 | 0.1309442 | 0.181 | 0.084 | 3.9E-223  | CD69    | CD69 molecule [Source:HGNC Symbol;Acc:HGNC:1694]                                          |
| 7.6E-111 | 0.1303614 | 0.801 | 0.788 | 1.5E-106  | RPL13A  | ribosomal protein L13a [Source:HGNC Symbol;Acc:HGNC:10304]                                |
| 7.8E-251 | 0.1302372 | 0.204 | 0.096 | 1.6E-246  | TNFAIP3 | TNF alpha induced protein 3 [Source:HGNC Symbol;Acc:HGNC:11896]                           |
| 4E-190   | 0.1286707 | 0.425 | 0.294 | 8.1E-186  | HLA-B   | major histocompatibility complex, class I, B [Source:HGNC Symbol;Acc:HGNC:4932]           |
| 1.3E-108 | 0.1271994 | 0.108 | 0.054 | 2.6E-104  | APOC1   | apolipoprotein C1 [Source:HGNC Symbol;Acc:HGNC:607]                                       |

|          |           |       |       |          |             |                                                                                               |
|----------|-----------|-------|-------|----------|-------------|-----------------------------------------------------------------------------------------------|
| 1.3E-153 | 0.1260815 | 0.105 | 0.044 | 2.7E-149 | CXCL8       | C-X-C motif chemokine ligand 8 [Source:HGNC Symbol;Acc:HGNC:6025]                             |
| 2.6E-216 | 0.1235268 | 0.29  | 0.172 | 5.3E-212 | OAZ1        | ornithine decarboxylase antizyme 1 [Source:HGNC Symbol;Acc:HGNC:8095]                         |
| 2.3E-119 | 0.1231067 | 0.602 | 0.495 | 4.6E-115 | RPL23A      | ribosomal protein L23a [Source:HGNC Symbol;Acc:HGNC:10317]                                    |
| 1.8E-192 | 0.12059   | 0.201 | 0.105 | 3.7E-188 | RGS1        | regulator of G protein signaling 1 [Source:HGNC Symbol;Acc:HGNC:9991]                         |
| 2.3E-164 | 0.118075  | 0.164 | 0.084 | 4.7E-160 | CTSB        | cathepsin B [Source:HGNC Symbol;Acc:HGNC:2527]                                                |
| 1.3E-206 | 0.1161589 | 0.179 | 0.087 | 2.6E-202 | NAMPT       | nicotinamide phosphoribosyltransferase [Source:HGNC Symbol;Acc:HGNC:30092]                    |
| 1.9E-186 | 0.1158723 | 0.258 | 0.154 | 3.8E-182 | ZFP36L2     | ZFP36 ring finger protein like 2 [Source:HGNC Symbol;Acc:HGNC:1108]                           |
| 2.4E-140 | 0.1157117 | 0.091 | 0.037 | 4.9E-136 | HMOX1       | heme oxygenase 1 [Source:HGNC Symbol;Acc:HGNC:5013]                                           |
| 9.5E-258 | 0.1154675 | 0.187 | 0.083 | 1.9E-253 | PTPRC       | protein tyrosine phosphatase receptor type C [Source:HGNC Symbol;Acc:HGNC:9666]               |
| 1.3E-171 | 0.1148387 | 0.353 | 0.239 | 2.5E-167 | DDX5        | DEAD-box helicase 5 [Source:HGNC Symbol;Acc:HGNC:2746]                                        |
| 1.1E-116 | 0.1141266 | 0.351 | 0.256 | 2.1E-112 | KLF6        | Kruppel like factor 6 [Source:HGNC Symbol;Acc:HGNC:2235]                                      |
| 2.5E-115 | 0.1137963 | 0.575 | 0.466 | 5.1E-111 | RPL35A      | ribosomal protein L35a [Source:HGNC Symbol;Acc:HGNC:10345]                                    |
| 1.01E-41 | 0.1135495 | 0.802 | 0.824 | 2.03E-37 | RPS18       | ribosomal protein S18 [Source:HGNC Symbol;Acc:HGNC:10401]                                     |
| 3.1E-79  | 0.1131777 | 0.938 | 0.956 | 6.26E-75 | RPL34       | ribosomal protein L34 [Source:HGNC Symbol;Acc:HGNC:10340]                                     |
| 1.2E-254 | 0.1116455 | 0.173 | 0.073 | 2.5E-250 | HCST        | hematopoietic cell signal transducer [Source:HGNC Symbol;Acc:HGNC:16977]                      |
| 5.63E-28 | 0.1103709 | 0.17  | 0.136 | 1.14E-23 | APOE        | apolipoprotein E [Source:HGNC Symbol;Acc:HGNC:613]                                            |
| 6E-133   | 0.1100751 | 0.187 | 0.11  | 1.2E-128 | GLUL        | glutamate-ammonia ligase [Source:HGNC Symbol;Acc:HGNC:4341]                                   |
| 5.52E-97 | 0.1099437 | 0.684 | 0.593 | 1.12E-92 | RPL36       | ribosomal protein L36 [Source:HGNC Symbol;Acc:HGNC:13631]                                     |
| 9.41E-78 | 0.1096215 | 0.128 | 0.079 | 1.9E-73  | SPARCL1     | SPARC like 1 [Source:HGNC Symbol;Acc:HGNC:11220]                                              |
| 8E-108   | 0.1086884 | 0.083 | 0.036 | 1.6E-103 | GNLY        | granulysin [Source:HGNC Symbol;Acc:HGNC:4414]                                                 |
| 6.6E-146 | 0.1080207 | 0.41  | 0.294 | 1.3E-141 | RPL27       | ribosomal protein L27 [Source:HGNC Symbol;Acc:HGNC:10328]                                     |
| 1.61E-28 | 0.10776   | 0.438 | 0.395 | 3.26E-24 | SAT1        | spermidine/spermine N1-acetyltransferase 1 [Source:HGNC Symbol;Acc:HGNC:10540]                |
| 5E-109   | 0.1063914 | 0.218 | 0.143 | 1E-104   | IL32        | interleukin 32 [Source:HGNC Symbol;Acc:HGNC:16830]                                            |
| 1.74E-83 | 0.1054351 | 0.793 | 0.776 | 3.52E-79 | RPS15       | ribosomal protein S15 [Source:HGNC Symbol;Acc:HGNC:10388]                                     |
| 1.1E-101 | 0.1037673 | 0.683 | 0.579 | 2.13E-97 | RPL35       | ribosomal protein L35 [Source:HGNC Symbol;Acc:HGNC:10344]                                     |
| 2.9E-134 | 0.1026336 | 0.32  | 0.22  | 5.8E-130 | JUND        | JunD proto-oncogene, AP-1 transcription factor subunit [Source:HGNC Symbol;Acc:HGNC:6206]     |
| 2.27E-59 | 0.1020385 | 0.184 | 0.133 | 4.59E-55 | SSR4        | signal sequence receptor subunit 4 [Source:HGNC Symbol;Acc:HGNC:11326]                        |
| 4.65E-55 | 0.1010736 | 0.712 | 0.674 | 9.4E-51  | RPS8        | ribosomal protein S8 [Source:HGNC Symbol;Acc:HGNC:10441]                                      |
| 3.92E-61 | 0.1007046 | 0.776 | 0.767 | 7.92E-57 | RPS27A      | ribosomal protein S27a [Source:HGNC Symbol;Acc:HGNC:10417]                                    |
| 6.4E-201 | 0.1006405 | 0.119 | 0.045 | 1.3E-196 | FABP5       | fatty acid binding protein 5 [Source:HGNC Symbol;Acc:HGNC:3560]                               |
| 1.5E-137 | 0.1006088 | 0.292 | 0.197 | 3E-133   | POMP        | proteasome maturation protein [Source:HGNC Symbol;Acc:HGNC:20330]                             |
| 3.37E-43 | 0.099499  | 0.936 | 0.956 | 6.82E-39 | RPS27       | ribosomal protein S27 [Source:HGNC Symbol;Acc:HGNC:10416]                                     |
| 5.6E-111 | 0.0992357 | 0.465 | 0.361 | 1.1E-106 | RPS9        | ribosomal protein S9 [Source:HGNC Symbol;Acc:HGNC:10442]                                      |
| 1.07E-82 | 0.0984044 | 0.844 | 0.849 | 2.17E-78 | PTMA        | prothymosin alpha [Source:HGNC Symbol;Acc:HGNC:9623]                                          |
| 8.2E-110 | 0.0983184 | 0.141 | 0.079 | 1.7E-105 | RNASE1      | ribonuclease A family member 1, pancreatic [Source:HGNC Symbol;Acc:HGNC:10044]                |
| 9.09E-47 | 0.0974722 | 0.768 | 0.761 | 1.84E-42 | RPL32       | ribosomal protein L32 [Source:HGNC Symbol;Acc:HGNC:10336]                                     |
| 1.2E-125 | 0.0971778 | 0.125 | 0.063 | 2.4E-121 | 11-1143G9.4 |                                                                                               |
| 3.4E-148 | 0.0965076 | 0.271 | 0.173 | 6.8E-144 | JUNB        | JunB proto-oncogene, AP-1 transcription factor subunit [Source:HGNC Symbol;Acc:HGNC:6205]     |
| 1.16E-76 | 0.0963026 | 0.169 | 0.111 | 2.34E-72 | TIMP1       | TIMP metalloproteinase inhibitor 1 [Source:HGNC Symbol;Acc:HGNC:11820]                        |
| 4.26E-60 | 0.0956524 | 0.24  | 0.182 | 8.6E-56  | PSAP        | prosaposin [Source:HGNC Symbol;Acc:HGNC:9498]                                                 |
| 2.1E-126 | 0.0936901 | 0.29  | 0.198 | 4.3E-122 | SEC61G      | SEC61 translocon gamma subunit [Source:HGNC Symbol;Acc:HGNC:18277]                            |
| 5.8E-124 | 0.0932917 | 0.288 | 0.197 | 1.2E-119 | MYL12A      | myosin light chain 12A [Source:HGNC Symbol;Acc:HGNC:16701]                                    |
| 1.7E-205 | 0.0917283 | 0.155 | 0.069 | 3.5E-201 | FYB         |                                                                                               |
| 7.47E-69 | 0.0913213 | 0.591 | 0.506 | 1.51E-64 | RPL11       | ribosomal protein L11 [Source:HGNC Symbol;Acc:HGNC:10301]                                     |
| 2.3E-45  | 0.0912764 | 0.123 | 0.085 | 4.65E-41 | CTGF        |                                                                                               |
| 9.9E-131 | 0.0909071 | 0.256 | 0.167 | 2E-126   | SUB1        | SUB1 regulator of transcription [Source:HGNC Symbol;Acc:HGNC:19985]                           |
| 6.78E-74 | 0.0905365 | 0.612 | 0.521 | 1.37E-69 | RPL12       | ribosomal protein L12 [Source:HGNC Symbol;Acc:HGNC:10302]                                     |
| 6E-122   | 0.0903148 | 0.087 | 0.037 | 1.2E-117 | CXCL3       | C-X-C motif chemokine ligand 3 [Source:HGNC Symbol;Acc:HGNC:4604]                             |
| 1.2E-100 | 0.0889756 | 0.458 | 0.358 | 2.41E-96 | UBA52       | ubiquitin A-52 residue ribosomal protein fusion product 1 [Source:HGNC Symbol;Acc:HGNC:12458] |
| 1.3E-189 | 0.0889099 | 0.141 | 0.062 | 2.6E-185 | LY96        | lymphocyte antigen 96 [Source:HGNC Symbol;Acc:HGNC:17156]                                     |
| 6.64E-69 | 0.0888845 | 0.051 | 0.022 | 1.34E-64 | CXCL10      | C-X-C motif chemokine ligand 10 [Source:HGNC Symbol;Acc:HGNC:10637]                           |
| 9.49E-84 | 0.0879261 | 0.574 | 0.475 | 1.92E-79 | RPS24       | ribosomal protein S24 [Source:HGNC Symbol;Acc:HGNC:10411]                                     |
| 7.18E-53 | 0.087566  | 0.092 | 0.057 | 1.45E-48 | CCL2        | C-C motif chemokine ligand 2 [Source:HGNC Symbol;Acc:HGNC:10618]                              |
| 1.9E-107 | 0.087067  | 0.35  | 0.256 | 3.9E-103 | EEF1D       | eukaryotic translation elongation factor 1 delta [Source:HGNC Symbol;Acc:HGNC:3211]           |
| 3.19E-94 | 0.0869114 | 0.436 | 0.342 | 6.44E-90 | EIF1        | eukaryotic translation initiation factor 1 [Source:HGNC Symbol;Acc:HGNC:3249]                 |
| 6.1E-183 | 0.0868026 | 0.149 | 0.069 | 1.2E-178 | COTL1       | coactosin like F-actin binding protein 1 [Source:HGNC Symbol;Acc:HGNC:18304]                  |
| 2E-165   | 0.0853908 | 0.154 | 0.076 | 4E-161   | SOCS3       | suppressor of cytokine signaling 3 [Source:HGNC Symbol;Acc:HGNC:19391]                        |
| 2.35E-55 | 0.0848511 | 0.311 | 0.247 | 4.75E-51 | EGR1        | early growth response 1 [Source:HGNC Symbol;Acc:HGNC:3238]                                    |
| 1.6E-104 | 0.0847341 | 0.362 | 0.267 | 3.2E-100 | PFDN5       | prefoldin subunit 5 [Source:HGNC Symbol;Acc:HGNC:8869]                                        |
| 1.37E-85 | 0.0847105 | 0.441 | 0.349 | 2.77E-81 | RPS5        | ribosomal protein S5 [Source:HGNC Symbol;Acc:HGNC:10426]                                      |
| 4.94E-79 | 0.0846198 | 0.484 | 0.396 | 9.99E-75 | RPL9        | ribosomal protein L9 [Source:HGNC Symbol;Acc:HGNC:10369]                                      |
| 2.16E-73 | 0.0843741 | 0.503 | 0.416 | 4.37E-69 | RPL19       | ribosomal protein L19 [Source:HGNC Symbol;Acc:HGNC:10312]                                     |
| 6.6E-114 | 0.0834352 | 0.1   | 0.047 | 1.3E-109 | LGMM        | legumain [Source:HGNC Symbol;Acc:HGNC:9472]                                                   |
| 3.6E-119 | 0.0832526 | 0.188 | 0.114 | 7.3E-115 | ID2         | inhibitor of DNA binding 2 [Source:HGNC Symbol;Acc:HGNC:5361]                                 |
| 8.3E-55  | 0.0829932 | 0.308 | 0.246 | 1.68E-50 | CST3        | cystatin C [Source:HGNC Symbol;Acc:HGNC:2475]                                                 |
| 8.7E-104 | 0.0825394 | 0.214 | 0.141 | 1.8E-99  | TSC22D3     | TSC22 domain family member 3 [Source:HGNC Symbol;Acc:HGNC:3051]                               |
| 6.8E-124 | 0.0820891 | 0.21  | 0.129 | 1.4E-119 | HLA-DPB     | major histocompatibility complex, class II, DP beta 1 [Source:HGNC Symbol;Acc:HGNC:4940]      |
| 2.85E-47 | 0.0820452 | 0.505 | 0.437 | 5.76E-43 | RPL3        | ribosomal protein L3 [Source:HGNC Symbol;Acc:HGNC:10332]                                      |
| 1.7E-126 | 0.0816477 | 0.209 | 0.129 | 3.5E-122 | MCL1        | MCL1 apoptosis regulator, BCL2 family member [Source:HGNC Symbol;Acc:HGNC:6943]               |
| 2.9E-172 | 0.0814574 | 0.132 | 0.059 | 5.9E-168 | LAPTM5      | lysosomal protein transmembrane 5 [Source:HGNC Symbol;Acc:HGNC:29612]                         |
| 1.45E-91 | 0.0814205 | 0.438 | 0.34  | 2.92E-87 | RPS16       | ribosomal protein S16 [Source:HGNC Symbol;Acc:HGNC:10396]                                     |
| 1E-103   | 0.0813393 | 0.087 | 0.04  | 2.1E-99  | CCL4L2      | C-C motif chemokine ligand 4 like 2 [Source:HGNC Symbol;Acc:HGNC:24066]                       |
| 1.6E-112 | 0.0811163 | 0.189 | 0.116 | 3.3E-108 | FKBP1A      | FKBP prolyl isomerase 1A [Source:HGNC Symbol;Acc:HGNC:3711]                                   |
| 1.06E-91 | 0.0809461 | 0.404 | 0.311 | 2.15E-87 | RPL18       | ribosomal protein L18 [Source:HGNC Symbol;Acc:HGNC:10310]                                     |

|          |           |       |       |          |          |                                                                                                                 |
|----------|-----------|-------|-------|----------|----------|-----------------------------------------------------------------------------------------------------------------|
| 4.33E-47 | 0.0806002 | 0.5   | 0.429 | 8.75E-43 | HSP90AA  | heat shock protein 90 alpha family class A member 1 [Source:HGNC Symbol;Acc:HGNC:5253]                          |
| 7.7E-131 | 0.0805605 | 0.159 | 0.088 | 1.6E-126 | MARCKS   | myristoylated alanine rich protein kinase C substrate [Source:HGNC Symbol;Acc:HGNC:6759]                        |
| 2.07E-44 | 0.0801528 | 0.694 | 0.644 | 4.19E-40 | RPS28    | ribosomal protein S28 [Source:HGNC Symbol;Acc:HGNC:10418]                                                       |
| 4.8E-114 | 0.0786855 | 0.175 | 0.105 | 9.6E-110 | SDCBP    | syndecan binding protein [Source:HGNC Symbol;Acc:HGNC:10662]                                                    |
| 4.6E-112 | 0.0786554 | 0.258 | 0.174 | 9.3E-108 | CFL1     | cofilin 1 [Source:HGNC Symbol;Acc:HGNC:1874]                                                                    |
| 4.1E-171 | 0.0776915 | 0.103 | 0.039 | 8.3E-167 | CD163    | CD163 molecule [Source:HGNC Symbol;Acc:HGNC:1631]                                                               |
| 4.9E-134 | 0.077046  | 0.112 | 0.052 | 9.8E-130 | PRDM1    | PR/SET domain 1 [Source:HGNC Symbol;Acc:HGNC:9346]                                                              |
| 5.53E-56 | 0.0770137 | 0.606 | 0.522 | 1.12E-51 | RPS25    | ribosomal protein S25 [Source:HGNC Symbol;Acc:HGNC:10413]                                                       |
| 1.6E-144 | 0.0769274 | 0.137 | 0.068 | 3.3E-140 | TYMP     | thymidine phosphorylase [Source:HGNC Symbol;Acc:HGNC:3148]                                                      |
| 4.7E-65  | 0.076884  | 0.621 | 0.53  | 9.62E-61 | ATP5E    |                                                                                                                 |
| 1.4E-115 | 0.0763277 | 0.119 | 0.061 | 2.8E-111 | CTSZ     | cathepsin Z [Source:HGNC Symbol;Acc:HGNC:2547]                                                                  |
| 4.41E-60 | 0.0761639 | 0.285 | 0.222 | 8.91E-56 | ZFP36L1  | ZFP36 ring finger protein like 1 [Source:HGNC Symbol;Acc:HGNC:1107]                                             |
| 1.5E-132 | 0.0759246 | 0.123 | 0.06  | 3E-128   | MS4A6A   | membrane spanning 4-domains A6A [Source:HGNC Symbol;Acc:HGNC:13375]                                             |
| 7.6E-141 | 0.075449  | 0.111 | 0.05  | 1.5E-136 | CD3D     | CD3d molecule [Source:HGNC Symbol;Acc:HGNC:1673]                                                                |
| 1.27E-84 | 0.0752985 | 0.363 | 0.277 | 2.56E-80 | RPL30    | ribosomal protein L30 [Source:HGNC Symbol;Acc:HGNC:10333]                                                       |
| 1.4E-128 | 0.0751263 | 0.144 | 0.077 | 2.8E-124 | STAT1    | signal transducer and activator of transcription 1 [Source:HGNC Symbol;Acc:HGNC:11362]                          |
| 2.97E-89 | 0.0750775 | 0.241 | 0.167 | 6E-85    | GPX1     | glutathione peroxidase 1 [Source:HGNC Symbol;Acc:HGNC:4553]                                                     |
| 2.6E-112 | 0.074571  | 0.22  | 0.141 | 5.3E-108 | RPS10    | ribosomal protein S10 [Source:HGNC Symbol;Acc:HGNC:10383]                                                       |
| 1.47E-86 | 0.0742331 | 0.291 | 0.212 | 2.98E-82 | HLA-A    | major histocompatibility complex, class I, A [Source:HGNC Symbol;Acc:HGNC:4931]                                 |
| 7E-135   | 0.0736708 | 0.121 | 0.058 | 1.4E-130 | LST1     | leukocyte specific transcript 1 [Source:HGNC Symbol;Acc:HGNC:14189]                                             |
| 7.4E-141 | 0.0736681 | 0.095 | 0.039 | 1.5E-136 | NKG7     | natural killer cell granule protein 7 [Source:HGNC Symbol;Acc:HGNC:7830]                                        |
| 1.5E-109 | 0.0736135 | 0.071 | 0.028 | 3.1E-105 | IL1B     | interleukin 1 beta [Source:HGNC Symbol;Acc:HGNC:5992]                                                           |
| 1.3E-124 | 0.0726046 | 0.129 | 0.066 | 2.6E-120 | PPP2R5C  | protein phosphatase 2 regulatory subunit B gamma [Source:HGNC Symbol;Acc:HGNC:9311]                             |
| 3.5E-130 | 0.0721985 | 0.14  | 0.073 | 7.1E-126 | CD44     | CD44 molecule (Indian blood group) [Source:HGNC Symbol;Acc:HGNC:1681]                                           |
| 2.8E-103 | 0.0720587 | 0.264 | 0.181 | 5.7E-99  | HLA-C    | major histocompatibility complex, class I, C [Source:HGNC Symbol;Acc:HGNC:4933]                                 |
| 7.9E-108 | 0.0704206 | 0.224 | 0.146 | 1.6E-103 | HLA-E    | major histocompatibility complex, class I, E [Source:HGNC Symbol;Acc:HGNC:4962]                                 |
| 1.36E-69 | 0.0702247 | 0.996 | 0.998 | 2.75E-65 | MALAT1   | metastasis associated lung adenocarcinoma transcript 1 [Source:HGNC Symbol;Acc:HGNC:29665]                      |
| 1.4E-162 | 0.070198  | 0.114 | 0.048 | 2.7E-158 | LCP1     | lymphocyte cytosolic protein 1 [Source:HGNC Symbol;Acc:HGNC:6528]                                               |
| 9.6E-149 | 0.0700564 | 0.133 | 0.064 | 1.9E-144 | GMFG     | glia maturation factor gamma [Source:HGNC Symbol;Acc:HGNC:4374]                                                 |
| 1.86E-23 | 0.0694025 | 0.618 | 0.572 | 3.77E-19 | RPS6     | ribosomal protein S6 [Source:HGNC Symbol;Acc:HGNC:10429]                                                        |
| 8.57E-90 | 0.0693454 | 0.254 | 0.178 | 1.73E-85 | CALM1    | calmodulin 1 [Source:HGNC Symbol;Acc:HGNC:1442]                                                                 |
| 4.15E-52 | 0.0693345 | 0.461 | 0.39  | 8.38E-48 | RPL15    | ribosomal protein L15 [Source:HGNC Symbol;Acc:HGNC:10306]                                                       |
| 1.88E-76 | 0.0692869 | 0.088 | 0.047 | 3.8E-72  | FN1      | fibronectin 1 [Source:HGNC Symbol;Acc:HGNC:3778]                                                                |
| 4.83E-82 | 0.0687546 | 0.166 | 0.107 | 9.77E-78 | SOD2     | superoxide dismutase 2 [Source:HGNC Symbol;Acc:HGNC:11180]                                                      |
| 4.83E-82 | 0.0687546 | 0.166 | 0.107 | 9.77E-78 | SOD2     | superoxide dismutase 2 [Source:NCBI gene;Acc:6648]                                                              |
| 3.47E-81 | 0.0685963 | 0.104 | 0.058 | 7.01E-77 | AREG     | amphiregulin [Source:HGNC Symbol;Acc:HGNC:651]                                                                  |
| 1.3E-122 | 0.0685407 | 0.171 | 0.098 | 2.7E-118 | TPM3     | tropomyosin 3 [Source:HGNC Symbol;Acc:HGNC:12012]                                                               |
| 3.21E-84 | 0.0683367 | 0.177 | 0.115 | 6.49E-80 | HLA-DPA1 | major histocompatibility complex, class II, DP alpha 1 [Source:HGNC Symbol;Acc:HGNC:4938]                       |
| 1.8E-140 | 0.0677112 | 0.086 | 0.033 | 3.6E-136 | CD14     | CD14 molecule [Source:HGNC Symbol;Acc:HGNC:1628]                                                                |
| 5.74E-26 | 0.0676785 | 0.269 | 0.227 | 1.16E-21 | HSPA1A   | heat shock protein family A (Hsp70) member 1A [Source:HGNC Symbol;Acc:HGNC:5232]                                |
| 7.79E-87 | 0.06745   | 0.195 | 0.13  | 1.57E-82 | PCBP1    | poly(rC) binding protein 1 [Source:HGNC Symbol;Acc:HGNC:8647]                                                   |
| 7.1E-149 | 0.0673218 | 0.091 | 0.035 | 1.4E-144 | STAB1    | stabilin 1 [Source:HGNC Symbol;Acc:HGNC:18628]                                                                  |
| 1.61E-89 | 0.0663044 | 0.165 | 0.104 | 3.25E-85 | NFKBIZ   | NFKB inhibitor zeta [Source:HGNC Symbol;Acc:HGNC:29805]                                                         |
| 1.2E-109 | 0.0661227 | 0.118 | 0.061 | 2.3E-105 | RG2      | regulator of G protein signaling 2 [Source:HGNC Symbol;Acc:HGNC:9998]                                           |
| 1.1E-117 | 0.0655293 | 0.139 | 0.076 | 2.1E-113 | MBNL1    | muscleblind like splicing regulator 1 [Source:HGNC Symbol;Acc:HGNC:6923]                                        |
| 4E-119   | 0.0648272 | 0.082 | 0.034 | 8E-115   | C1QC     | complement C1q C chain [Source:HGNC Symbol;Acc:HGNC:1245]                                                       |
| 6.8E-99  | 0.0647917 | 0.186 | 0.118 | 1.37E-94 | ARPC2    | actin related protein 2/3 complex subunit 2 [Source:HGNC Symbol;Acc:HGNC:705]                                   |
| 5.45E-25 | 0.0645774 | 0.302 | 0.259 | 1.1E-20  | HSPA1B   | heat shock protein family A (Hsp70) member 1B [Source:HGNC Symbol;Acc:HGNC:5233]                                |
| 1E-86    | 0.0643082 | 0.081 | 0.04  | 2.02E-82 | CAV1     | caveolin 1 [Source:HGNC Symbol;Acc:HGNC:1527]                                                                   |
| 2.67E-39 | 0.0642229 | 0.353 | 0.295 | 5.4E-35  | JUN      | Jun proto-oncogene, AP-1 transcription factor subunit [Source:HGNC Symbol;Acc:HGNC:6204]                        |
| 2.8E-106 | 0.0641578 | 0.144 | 0.082 | 5.6E-102 | ACTR2    | actin related protein 2 [Source:HGNC Symbol;Acc:HGNC:169]                                                       |
| 9.8E-95  | 0.0635508 | 0.147 | 0.088 | 1.98E-90 | KLF2     | Kruppel like factor 2 [Source:HGNC Symbol;Acc:HGNC:6347]                                                        |
| 4.91E-46 | 0.0631856 | 0.142 | 0.1   | 9.93E-42 | IER3     | immediate early response 3 [Source:HGNC Symbol;Acc:HGNC:5392]                                                   |
| 6.1E-109 | 0.0630072 | 0.138 | 0.077 | 1.2E-104 | EMP3     | epithelial membrane protein 3 [Source:HGNC Symbol;Acc:HGNC:3335]                                                |
| 4.96E-77 | 0.0625117 | 0.209 | 0.145 | 1E-72    | YWHAZ    | tyrosine 3-monooxygenase/tryptophan 5-monooxygenase activation protein zeta [Source:HGNC Symbol;Acc:HGNC:12855] |
| 9.23E-48 | 0.0624523 | 0.503 | 0.426 | 1.86E-43 | RPS17    | ribosomal protein S17 [Source:HGNC Symbol;Acc:HGNC:10397]                                                       |
| 7.6E-89  | 0.0624424 | 0.172 | 0.109 | 1.54E-84 | FUS      | FUS RNA binding protein [Source:HGNC Symbol;Acc:HGNC:4010]                                                      |
| 1.4E-99  | 0.062431  | 0.157 | 0.094 | 2.76E-95 | C6orf62  | chromosome 6 open reading frame 62 [Source:HGNC Symbol;Acc:HGNC:20998]                                          |
| 8.3E-122 | 0.0621735 | 0.097 | 0.043 | 1.7E-117 | CD2      | CD2 molecule [Source:HGNC Symbol;Acc:HGNC:1639]                                                                 |
| 2.73E-92 | 0.0617606 | 0.115 | 0.063 | 5.52E-88 | MAFB     | MAF bZIP transcription factor B [Source:HGNC Symbol;Acc:HGNC:6408]                                              |
| 1.51E-36 | 0.0616816 | 0.481 | 0.418 | 3.06E-32 | RPS4X    | ribosomal protein S4 X-linked [Source:HGNC Symbol;Acc:HGNC:10424]                                               |
| 2.83E-75 | 0.0614906 | 0.1   | 0.056 | 5.71E-71 | XBP1     | X-box binding protein 1 [Source:HGNC Symbol;Acc:HGNC:12801]                                                     |
| 1.4E-103 | 0.0611236 | 0.141 | 0.08  | 2.9E-99  | IFI16    | interferon gamma inducible protein 16 [Source:HGNC Symbol;Acc:HGNC:5395]                                        |
| 6E-123   | 0.0609855 | 0.123 | 0.062 | 1.2E-118 | IRF1     | interferon regulatory factor 1 [Source:HGNC Symbol;Acc:HGNC:6116]                                               |
| 9.38E-97 | 0.0605704 | 0.151 | 0.09  | 1.89E-92 | VAMP5    | vesicle associated membrane protein 5 [Source:HGNC Symbol;Acc:HGNC:12646]                                       |
| 7.22E-58 | 0.0595252 | 0.346 | 0.274 | 1.46E-53 | RPL23    | ribosomal protein L23 [Source:HGNC Symbol;Acc:HGNC:10316]                                                       |
| 6.85E-76 | 0.059361  | 0.209 | 0.145 | 1.38E-71 | NAP1L1   | nucleosome assembly protein 1 like 1 [Source:HGNC Symbol;Acc:HGNC:7637]                                         |
| 1.8E-117 | 0.059276  | 0.096 | 0.044 | 3.6E-113 | CD83     | CD83 molecule [Source:HGNC Symbol;Acc:HGNC:1703]                                                                |
| 1.87E-29 | 0.0592195 | 0.606 | 0.547 | 3.78E-25 | RPS23    | ribosomal protein S23 [Source:HGNC Symbol;Acc:HGNC:10410]                                                       |
| 5.95E-51 | 0.058778  | 0.454 | 0.377 | 1.2E-46  | RPS20    | ribosomal protein S20 [Source:HGNC Symbol;Acc:HGNC:10405]                                                       |
| 2.04E-83 | 0.058224  | 0.109 | 0.061 | 4.13E-79 | ISG15    | ISG15 ubiquitin like modifier [Source:HGNC Symbol;Acc:HGNC:4053]                                                |
| 3.82E-93 | 0.0580922 | 0.126 | 0.072 | 7.73E-89 | CMTM6    | CKLF like MARVEL transmembrane domain containing 6 [Source:HGNC Symbol;Acc:HGNC:19177]                          |
| 1.85E-90 | 0.0580044 | 0.116 | 0.064 | 3.73E-86 | KLF4     | Kruppel like factor 4 [Source:HGNC Symbol;Acc:HGNC:6348]                                                        |
| 9.09E-73 | 0.0575692 | 0.091 | 0.05  | 1.84E-68 | CTSL     | cathepsin L [Source:HGNC Symbol;Acc:HGNC:2537]                                                                  |

|          |           |       |       |          |          |                                                                                                          |
|----------|-----------|-------|-------|----------|----------|----------------------------------------------------------------------------------------------------------|
| 8.39E-59 | 0.0573543 | 0.154 | 0.106 | 1.7E-54  | SGK1     | serum/glucocorticoid regulated kinase 1 [Source:HGNC Symbol;Acc:HGNC:10810]                              |
| 6.67E-58 | 0.0571695 | 0.404 | 0.326 | 1.35E-53 | RPS11    | ribosomal protein S11 [Source:HGNC Symbol;Acc:HGNC:10384]                                                |
| 2.3E-111 | 0.05712   | 0.091 | 0.041 | 4.7E-107 | LIPA     | lipase A, lysosomal acid type [Source:HGNC Symbol;Acc:HGNC:6617]                                         |
| 1.2E-80  | 0.056405  | 0.073 | 0.034 | 2.43E-76 | CCL3L3   | C-C motif chemokine ligand 3 like 3 [Source:HGNC Symbol;Acc:HGNC:30554]                                  |
| 3.5E-99  | 0.0563928 | 0.121 | 0.066 | 7.17E-95 | CAPZA1   | capping actin protein of muscle Z-line subunit alpha 1 [Source:HGNC Symbol;Acc:HGNC:1488]                |
| 1.3E-115 | 0.0563797 | 0.087 | 0.038 | 2.6E-111 | CYBB     | cytochrome b-245 beta chain [Source:HGNC Symbol;Acc:HGNC:2578]                                           |
| 4.1E-122 | 0.056161  | 0.081 | 0.033 | 8.3E-118 | PLEK     | pleckstrin [Source:HGNC Symbol;Acc:HGNC:9070]                                                            |
| 7.58E-89 | 0.0559958 | 0.122 | 0.07  | 1.53E-84 | CELF2    | CUGBP Elav-like family member 2 [Source:HGNC Symbol;Acc:HGNC:2550]                                       |
| 2.7E-103 | 0.055768  | 0.107 | 0.054 | 5.5E-99  | ZEB2     | zinc finger E-box binding homeobox 2 [Source:HGNC Symbol;Acc:HGNC:14881]                                 |
| 8.9E-126 | 0.0554328 | 0.08  | 0.031 | 1.8E-121 | FCGR3A   | Fc fragment of IgG receptor IIIa [Source:HGNC Symbol;Acc:HGNC:3619]                                      |
| 1.11E-65 | 0.0553615 | 0.153 | 0.102 | 2.24E-61 | H2AFZ    |                                                                                                          |
| 1.24E-68 | 0.0552402 | 0.16  | 0.107 | 2.5E-64  | PNRC1    | proline rich nuclear receptor coactivator 1 [Source:HGNC Symbol;Acc:HGNC:17278]                          |
| 9.72E-97 | 0.0551318 | 0.077 | 0.035 | 1.96E-92 | MSR1     | macrophage scavenger receptor 1 [Source:HGNC Symbol;Acc:HGNC:7376]                                       |
| 7.44E-29 | 0.0551156 | 0.525 | 0.465 | 1.5E-24  | RPL7     | ribosomal protein L7 [Source:HGNC Symbol;Acc:HGNC:10363]                                                 |
| 4.37E-84 | 0.0549917 | 0.089 | 0.046 | 8.84E-80 | RGCC     | regulator of cell cycle [Source:HGNC Symbol;Acc:HGNC:20369]                                              |
| 1.46E-83 | 0.0545593 | 0.14  | 0.085 | 2.95E-79 | ARPC5    | actin related protein 2/3 complex subunit 5 [Source:HGNC Symbol;Acc:HGNC:708]                            |
| 2.11E-69 | 0.0542733 | 0.113 | 0.068 | 4.27E-65 | TCF4     | transcription factor 4 [Source:HGNC Symbol;Acc:HGNC:11634]                                               |
| 2.49E-17 | 0.0542149 | 0.839 | 0.86  | 5.04E-13 | RPS29    | ribosomal protein S29 [Source:HGNC Symbol;Acc:HGNC:10419]                                                |
| 1.99E-67 | 0.0541474 | 0.15  | 0.099 | 4.03E-63 | BTG2     | BTG anti-proliferation factor 2 [Source:HGNC Symbol;Acc:HGNC:1131]                                       |
| 4.75E-60 | 0.0535463 | 0.24  | 0.179 | 9.61E-56 | YBX1     | Y-box binding protein 1 [Source:HGNC Symbol;Acc:HGNC:8014]                                               |
| 6.49E-54 | 0.0530038 | 0.236 | 0.178 | 1.31E-49 | CDC42    | cell division cycle 42 [Source:HGNC Symbol;Acc:HGNC:1736]                                                |
| 6.6E-103 | 0.0527934 | 0.115 | 0.06  | 1.33E-98 | ARHGDI2  | Rho GDP dissociation inhibitor beta [Source:HGNC Symbol;Acc:HGNC:679]                                    |
| 9.04E-48 | 0.0525878 | 0.313 | 0.251 | 1.83E-43 | C14orf2  |                                                                                                          |
| 2.6E-122 | 0.0524908 | 0.081 | 0.033 | 5.3E-118 | SAMSN1   | SAM domain, SH3 domain and nuclear localization signals 1 [Source:HGNC Symbol;Acc:HGNC:10528]            |
| 6.53E-81 | 0.0521013 | 0.061 | 0.026 | 1.32E-76 | ACKR1    | atypical chemokine receptor 1 (Duffy blood group) [Source:HGNC Symbol;Acc:HGNC:4035]                     |
| 4.53E-47 | 0.0520662 | 0.35  | 0.284 | 9.15E-43 | RPS7     | ribosomal protein S7 [Source:HGNC Symbol;Acc:HGNC:10440]                                                 |
| 1.68E-67 | 0.0519841 | 0.163 | 0.11  | 3.4E-63  | DDX3X    | DEAD-box helicase 3 X-linked [Source:HGNC Symbol;Acc:HGNC:2745]                                          |
| 7.37E-87 | 0.0517178 | 0.086 | 0.043 | 1.49E-82 | MNDA     | myeloid cell nuclear differentiation antigen [Source:HGNC Symbol;Acc:HGNC:7183]                          |
| 7.66E-75 | 0.0515781 | 0.143 | 0.091 | 1.55E-70 | SRSF2    | serine and arginine rich splicing factor 2 [Source:HGNC Symbol;Acc:HGNC:10783]                           |
| 3.3E-105 | 0.0514713 | 0.089 | 0.041 | 6.8E-101 | WIPF1    | WAS/WASL interacting protein family member 1 [Source:HGNC Symbol;Acc:HGNC:12736]                         |
| 1.32E-90 | 0.0512632 | 0.056 | 0.021 | 2.66E-86 | IFNG     | interferon gamma [Source:HGNC Symbol;Acc:HGNC:5438]                                                      |
| 1.65E-92 | 0.0508616 | 0.071 | 0.031 | 3.33E-88 | GZMA     | granzyme A [Source:HGNC Symbol;Acc:HGNC:4708]                                                            |
| 2.4E-107 | 0.0503788 | 0.086 | 0.039 | 4.8E-103 | CORO1A   | coronin 1A [Source:HGNC Symbol;Acc:HGNC:2252]                                                            |
| 7.4E-107 | 0.0500483 | 0.072 | 0.029 | 1.5E-102 | GBP1     | guanylate binding protein 1 [Source:HGNC Symbol;Acc:HGNC:4182]                                           |
| 4.3E-108 | -0.050088 | 0.018 | 0.055 | 8.6E-104 | BEX2     | brain expressed X-linked 2 [Source:HGNC Symbol;Acc:HGNC:30933]                                           |
| 2.1E-117 | -0.050106 | 0.015 | 0.052 | 4.2E-113 | KRT7     | keratin 7 [Source:HGNC Symbol;Acc:HGNC:6445]                                                             |
| 4.37E-13 | -0.050117 | 0.152 | 0.17  | 8.83E-09 | NDUFA3   | NADH:ubiquinone oxidoreductase subunit A3 [Source:HGNC Symbol;Acc:HGNC:7686]                             |
| 2.73E-53 | -0.050602 | 0.063 | 0.1   | 5.53E-49 | C12orf75 | chromosome 12 open reading frame 75 [Source:HGNC Symbol;Acc:HGNC:35164]                                  |
| 1.51E-20 | -0.0513   | 0.142 | 0.168 | 3.05E-16 | COX6A1   | cytochrome c oxidase subunit 6A1 [Source:HGNC Symbol;Acc:HGNC:2277]                                      |
| 2.03E-48 | -0.05254  | 0.04  | 0.069 | 4.09E-44 | MIR4458H | MIR4458 host gene [Source:HGNC Symbol;Acc:HGNC:49008]                                                    |
| 7.6E-19  | -0.052871 | 0.191 | 0.218 | 1.54E-14 | NDUFB2   | NADH:ubiquinone oxidoreductase subunit B2 [Source:HGNC Symbol;Acc:HGNC:7697]                             |
| 2.57E-26 | -0.053049 | 0.126 | 0.155 | 5.19E-22 | MIF      | macrophage migration inhibitory factor [Source:HGNC Symbol;Acc:HGNC:7097]                                |
| 3.74E-64 | -0.054026 | 0.067 | 0.109 | 7.56E-60 | TSC2D1   | TSC22 domain family member 1 [Source:HGNC Symbol;Acc:HGNC:16826]                                         |
| 4.5E-132 | -0.054967 | 0.016 | 0.056 | 9E-128   | TSPAN1   | tetraspanin 1 [Source:HGNC Symbol;Acc:HGNC:20657]                                                        |
| 4.43E-18 | -0.055288 | 0.203 | 0.229 | 8.96E-14 | COX7B    | cytochrome c oxidase subunit 7B [Source:HGNC Symbol;Acc:HGNC:2291]                                       |
| 3.96E-11 | -0.055894 | 0.196 | 0.212 | 8E-07    | MT-RNR2L | MT-RNR2 like 8 [Source:HGNC Symbol;Acc:HGNC:37165]                                                       |
| 2.7E-142 | -0.056333 | 0.019 | 0.064 | 5.5E-138 | CKB      | creatine kinase B [Source:HGNC Symbol;Acc:HGNC:1991]                                                     |
| 9.4E-130 | -0.057228 | 0.02  | 0.064 | 1.9E-125 | ELF3     | E74 like ETS transcription factor 3 [Source:HGNC Symbol;Acc:HGNC:3318]                                   |
| 5.97E-47 | -0.058588 | 0.115 | 0.157 | 1.21E-42 | GPX3     | glutathione peroxidase 3 [Source:HGNC Symbol;Acc:HGNC:4555]                                              |
| 1.3E-102 | -0.06023  | 0.025 | 0.064 | 2.53E-98 | BEX5     | brain expressed X-linked 5 [Source:HGNC Symbol;Acc:HGNC:27990]                                           |
| 3.5E-143 | -0.060984 | 0.025 | 0.074 | 7.1E-139 | CAMK2N1  | calcium/calmodulin dependent protein kinase II inhibitor 1 [Source:HGNC Symbol;Acc:HGNC:24190]           |
| 9.8E-114 | -0.061328 | 0.04  | 0.09  | 2E-109   | CYSTM1   | cysteine rich transmembrane module containing 1 [Source:HGNC Symbol;Acc:HGNC:30239]                      |
| 7.21E-60 | -0.06133  | 0.087 | 0.131 | 1.46E-55 | NDUFB9   | NADH:ubiquinone oxidoreductase subunit B9 [Source:HGNC Symbol;Acc:HGNC:7704]                             |
| 2.4E-115 | -0.061889 | 0.028 | 0.073 | 4.9E-111 | TACSTD2  | tumor associated calcium signal transducer 2 [Source:HGNC Symbol;Acc:HGNC:11530]                         |
| 1.55E-29 | -0.062072 | 0.189 | 0.224 | 3.13E-25 | PPDF     | pancreatic progenitor cell differentiation and proliferation factor [Source:HGNC Symbol;Acc:HGNC:16142]  |
| 2.42E-39 | -0.062106 | 0.076 | 0.108 | 4.88E-35 | SRSF6    | serine and arginine rich splicing factor 6 [Source:HGNC Symbol;Acc:HGNC:10788]                           |
| 1.3E-172 | -0.063763 | 0.024 | 0.079 | 2.5E-168 | EPCAM    | epithelial cell adhesion molecule [Source:HGNC Symbol;Acc:HGNC:11529]                                    |
| 2.16E-55 | -0.06417  | 0.998 | 0.999 | 4.36E-51 | MT-ND3   | mitochondrially encoded NADH:ubiquinone oxidoreductase core subunit 3 [Source:HGNC Symbol;Acc:HGNC:7458] |
| 4.3E-112 | -0.064619 | 0.031 | 0.076 | 8.6E-108 | SDC4     | syndecan 4 [Source:HGNC Symbol;Acc:HGNC:10661]                                                           |
| 8.86E-52 | -0.065333 | 0.127 | 0.172 | 1.79E-47 | ATPIF1   |                                                                                                          |
| 1.27E-41 | -0.065655 | 0.076 | 0.11  | 2.57E-37 | TIMP3    | TIMP metalloproteinase inhibitor 3 [Source:HGNC Symbol;Acc:HGNC:11822]                                   |
| 5.1E-154 | -0.06837  | 0.017 | 0.064 | 1E-149   | KRT19    | keratin 19 [Source:HGNC Symbol;Acc:HGNC:6436]                                                            |
| 3.3E-155 | -0.069288 | 0.027 | 0.08  | 6.6E-151 | KRT18    | keratin 18 [Source:HGNC Symbol;Acc:HGNC:6430]                                                            |
| 2.12E-80 | -0.069777 | 0.097 | 0.151 | 4.29E-76 | LDHB     | lactate dehydrogenase B [Source:HGNC Symbol;Acc:HGNC:6541]                                               |
| 9.9E-159 | -0.069932 | 0.01  | 0.052 | 2E-154   | BCYRN1   | brain cytoplasmic RNA 1 [Source:HGNC Symbol;Acc:HGNC:1022]                                               |
| 1.16E-27 | -0.07015  | 0.361 | 0.39  | 2.34E-23 | COX7C    | cytochrome c oxidase subunit 7C [Source:HGNC Symbol;Acc:HGNC:2292]                                       |
| 1.39E-52 | -0.070299 | 0.116 | 0.16  | 2.81E-48 | MRPL33   | mitochondrial ribosomal protein L33 [Source:HGNC Symbol;Acc:HGNC:14487]                                  |
| 5E-34    | -0.070719 | 0.19  | 0.227 | 1.01E-29 | NDUFA1   | NADH:ubiquinone oxidoreductase subunit A1 [Source:HGNC Symbol;Acc:HGNC:7683]                             |
| 2.7E-178 | -0.072482 | 0.029 | 0.089 | 5.5E-174 | KCNJ16   | potassium inwardly rectifying channel subfamily J member 16 [Source:HGNC Symbol;Acc:HGNC:6262]           |
| 9.4E-193 | -0.072587 | 0.02  | 0.076 | 1.9E-188 | MAL      | mal, T cell differentiation protein [Source:HGNC Symbol;Acc:HGNC:6817]                                   |
| 1.78E-25 | -0.07299  | 0.171 | 0.199 | 3.59E-21 | NDUFB1   | NADH:ubiquinone oxidoreductase subunit B1 [Source:HGNC Symbol;Acc:HGNC:7695]                             |
| 3.8E-211 | -0.074377 | 0.017 | 0.074 | 7.7E-207 | CA12     | carbonic anhydrase 12 [Source:HGNC Symbol;Acc:HGNC:1371]                                                 |
| 2.37E-88 | -0.074458 | 0.106 | 0.166 | 4.79E-84 | APP      | amyloid beta precursor protein [Source:HGNC Symbol;Acc:HGNC:620]                                         |
| 1.18E-82 | -0.074618 | 0.093 | 0.147 | 2.38E-78 | HIST1H4C |                                                                                                          |

|          |           |       |       |          |         |                                                                                                           |
|----------|-----------|-------|-------|----------|---------|-----------------------------------------------------------------------------------------------------------|
| 5.1E-143 | -0.07686  | 0.032 | 0.085 | 1E-138   | PCSK1N  | proprotein convertase subtilisin/kexin type 1 inhibitor [Source:HGNC Symbol;Acc:HGNC:17301]               |
| 3.87E-82 | -0.077906 | 0.089 | 0.142 | 7.82E-78 | NDUFC1  | NADH:ubiquinone oxidoreductase subunit C1 [Source:HGNC Symbol;Acc:HGNC:7705]                              |
| 2.6E-177 | -0.078629 | 0.009 | 0.053 | 5.3E-173 | ITRNR2L | MT-RNR2 like 1 [Source:HGNC Symbol;Acc:HGNC:37155]                                                        |
| 1.43E-33 | -0.078677 | 0.31  | 0.346 | 2.88E-29 | SRP14   | signal recognition particle 14 [Source:HGNC Symbol;Acc:HGNC:11299]                                        |
| 4.7E-104 | -0.079046 | 0.069 | 0.125 | 9.4E-100 | S100A13 | S100 calcium binding protein A13 [Source:HGNC Symbol;Acc:HGNC:10490]                                      |
| 1.8E-108 | -0.079319 | 0.087 | 0.149 | 3.7E-104 | PBP1    | phosphatidylethanolamine binding protein 1 [Source:HGNC Symbol;Acc:HGNC:8630]                             |
| 6.89E-38 | -0.079506 | 0.225 | 0.264 | 1.39E-33 | UQCRCQ  | ubiquinol-cytochrome c reductase complex III subunit VII [Source:HGNC Symbol;Acc:HGNC:29594]              |
| 4.11E-96 | -0.079603 | 0.066 | 0.119 | 8.3E-92  | TPM1    | tropomyosin 1 [Source:HGNC Symbol;Acc:HGNC:12010]                                                         |
| 1.8E-152 | -0.086028 | 0.045 | 0.107 | 3.6E-148 | SMIM24  | small integral membrane protein 24 [Source:HGNC Symbol;Acc:HGNC:37244]                                    |
| 1.82E-95 | -0.086456 | 0.114 | 0.178 | 3.67E-91 | CD9     | CD9 molecule [Source:HGNC Symbol;Acc:HGNC:1709]                                                           |
| 5.3E-60  | -0.086514 | 0.056 | 0.094 | 1.07E-55 | MT1F    | metallothionein 1F [Source:HGNC Symbol;Acc:HGNC:7398]                                                     |
| 9.91E-20 | -0.086666 | 0.074 | 0.096 | 2E-15    | MT1H    | metallothionein 1H [Source:HGNC Symbol;Acc:HGNC:7400]                                                     |
| 2.18E-54 | -0.088618 | 0.266 | 0.317 | 4.41E-50 | NDUFA4  | NDUFA4 mitochondrial complex associated [Source:HGNC Symbol;Acc:HGNC:37244]                               |
| 4.2E-207 | -0.089587 | 0.029 | 0.094 | 8.5E-203 | CDH16   | cadherin 16 [Source:HGNC Symbol;Acc:HGNC:1755]                                                            |
| 1.3E-138 | -0.093387 | 0.055 | 0.117 | 2.5E-134 | SOX4    | SRY-box transcription factor 4 [Source:HGNC Symbol;Acc:HGNC:11200]                                        |
| 3.25E-75 | -0.093558 | 0.164 | 0.222 | 6.56E-71 | GSTP1   | glutathione S-transferase pi 1 [Source:HGNC Symbol;Acc:HGNC:4638]                                         |
| 5.8E-135 | -0.094238 | 0.1   | 0.173 | 1.2E-130 | NGFRAP1 |                                                                                                           |
| 1.39E-86 | -0.100207 | 0.142 | 0.202 | 2.81E-82 | COX5B   | cytochrome c oxidase subunit 5B [Source:HGNC Symbol;Acc:HGNC:2269]                                        |
| 7.1E-258 | -0.102787 | 0.008 | 0.067 | 1.4E-253 | SLC5A12 | solute carrier family 5 member 12 [Source:HGNC Symbol;Acc:HGNC:28750]                                     |
| 6.9E-232 | -0.104945 | 0.049 | 0.132 | 1.4E-227 | EMX2    | empty spiracles homeobox 2 [Source:HGNC Symbol;Acc:HGNC:3341]                                             |
| 2.7E-159 | -0.106004 | 0.073 | 0.146 | 5.4E-155 | ATP1A1  | ATPase Na <sup>+</sup> /K <sup>+</sup> transporting subunit alpha 1 [Source:HGNC Symbol;Acc:HGNC:799]     |
| 3.61E-43 | -0.107668 | 0.394 | 0.43  | 7.3E-39  | ITM2B   | integral membrane protein 2B [Source:HGNC Symbol;Acc:HGNC:6174]                                           |
| 1.1E-183 | -0.109873 | 0.017 | 0.069 | 2.2E-179 | TMEM52B | transmembrane protein 52B [Source:HGNC Symbol;Acc:HGNC:26438]                                             |
| 2.5E-144 | -0.111161 | 0.089 | 0.161 | 5.1E-140 | WBP5    |                                                                                                           |
| 8.5E-220 | -0.114523 | 1     | 1     | 1.7E-215 | MT-CO1  | mitochondrially encoded cytochrome c oxidase I [Source:HGNC Symbol;Acc:HGNC:7419]                         |
| 1.7E-272 | -0.116162 | 0.037 | 0.122 | 3.4E-268 | MUC1    | mucin 1, cell surface associated [Source:HGNC Symbol;Acc:HGNC:7508]                                       |
| 5.4E-218 | -0.116598 | 0.027 | 0.093 | 1.1E-213 | PIGR    | polymeric immunoglobulin receptor [Source:HGNC Symbol;Acc:HGNC:8968]                                      |
| 2E-201   | -0.118354 | 0.017 | 0.074 | 4.1E-197 | FXYP4   | FXYP domain containing ion transport regulator 4 [Source:HGNC Symbol;Acc:HGNC:4028]                       |
| 0        | -0.122981 | 0.002 | 0.07  | 0        | SPINK1  | serine peptidase inhibitor, Kazal type 1 [Source:HGNC Symbol;Acc:HGNC:11244]                              |
| 2.9E-126 | -0.126977 | 0.032 | 0.082 | 5.9E-122 | SLC12A1 | solute carrier family 12 member 1 [Source:HGNC Symbol;Acc:HGNC:10910]                                     |
| 2.6E-214 | -0.132925 | 0.995 | 0.997 | 5.2E-210 | MT-ND2  | mitochondrially encoded NADH:ubiquinone oxidoreductase core subunit 2 [Source:HGNC Symbol;Acc:HGNC:7456]  |
| 3.4E-267 | -0.142459 | 0.995 | 0.997 | 6.9E-263 | MT-ATP6 | mitochondrially encoded ATP synthase membrane subunit 6 [Source:HGNC Symbol;Acc:HGNC:7414]                |
| 6.8E-150 | -0.145223 | 0.081 | 0.153 | 1.4E-145 | MT1E    | metallothionein 1E [Source:HGNC Symbol;Acc:HGNC:7397]                                                     |
| 4.17E-54 | -0.147126 | 0.331 | 0.383 | 8.43E-50 | MT2A    | metallothionein 2A [Source:HGNC Symbol;Acc:HGNC:7406]                                                     |
| 0        | -0.149393 | 1     | 1     | 0        | MT-CO3  | mitochondrially encoded cytochrome c oxidase III [Source:HGNC Symbol;Acc:HGNC:7422]                       |
| 3.5E-215 | -0.15193  | 0.185 | 0.303 | 7.1E-211 | IGFBP7  | insulin like growth factor binding protein 7 [Source:HGNC Symbol;Acc:HGNC:5476]                           |
| 8.2E-235 | -0.156502 | 0.035 | 0.111 | 1.7E-230 | MMP7    | matrix metalloproteinase 7 [Source:HGNC Symbol;Acc:HGNC:7174]                                             |
| 0        | -0.163257 | 1     | 1     | 0        | MT-ND4  | mitochondrially encoded NADH:ubiquinone oxidoreductase core subunit 4 [Source:HGNC Symbol;Acc:HGNC:7459]  |
| 6.2E-204 | -0.169713 | 0.064 | 0.149 | 1.3E-199 | IGFBP5  | insulin like growth factor binding protein 5 [Source:HGNC Symbol;Acc:HGNC:5474]                           |
| 5.59E-28 | -0.170534 | 0.172 | 0.205 | 1.13E-23 | MT1X    | metallothionein 1X [Source:HGNC Symbol;Acc:HGNC:7405]                                                     |
| 0        | -0.177199 | 0.044 | 0.143 | 0        | CRYAB   | crystallin alpha B [Source:HGNC Symbol;Acc:HGNC:2389]                                                     |
| 0        | -0.178414 | 1     | 1     | 0        | MT-CO2  | mitochondrially encoded cytochrome c oxidase II [Source:HGNC Symbol;Acc:HGNC:7421]                        |
| 1.9E-265 | -0.179665 | 0.1   | 0.209 | 3.9E-261 | HES1    | hes family bHLH transcription factor 1 [Source:HGNC Symbol;Acc:HGNC:5192]                                 |
| 1.4E-186 | -0.184109 | 0.329 | 0.427 | 2.8E-182 | ATP5I   |                                                                                                           |
| 2.4E-169 | -0.189938 | 0.037 | 0.1   | 4.8E-165 | UMOD    | uromodulin [Source:HGNC Symbol;Acc:HGNC:12559]                                                            |
| 2.6E-173 | -0.190719 | 0.152 | 0.236 | 5.2E-169 | MT-ATP8 | mitochondrially encoded ATP synthase membrane subunit 8 [Source:HGNC Symbol;Acc:HGNC:7415]                |
| 3.9E-287 | -0.192742 | 0.171 | 0.297 | 7.8E-283 | DSTN    | destrin, actin depolymerizing factor [Source:HGNC Symbol;Acc:HGNC:15750]                                  |
| 1.9E-248 | -0.197461 | 0.058 | 0.148 | 3.9E-244 | CXCL14  | C-X-C motif chemokine ligand 14 [Source:HGNC Symbol;Acc:HGNC:10640]                                       |
| 0        | -0.200632 | 0.087 | 0.227 | 0        | CD24    | CD24 molecule [Source:HGNC Symbol;Acc:HGNC:1645]                                                          |
| 0        | -0.223201 | 0.142 | 0.274 | 0        | HSPB1   | heat shock protein family B (small) member 1 [Source:HGNC Symbol;Acc:HGNC:5246]                           |
| 0        | -0.232051 | 0.986 | 0.993 | 0        | MT-CYB  | mitochondrially encoded cytochrome b [Source:HGNC Symbol;Acc:HGNC:7427]                                   |
| 6E-307   | -0.242056 | 0.154 | 0.287 | 1.2E-302 | ADIRF   | adipogenesis regulatory factor [Source:HGNC Symbol;Acc:HGNC:24043]                                        |
| 0        | -0.254495 | 0.106 | 0.229 | 0        | TRNR2L  | MT-RNR2 like 12 [Source:HGNC Symbol;Acc:HGNC:37169]                                                       |
| 1.7E-301 | -0.264382 | 0.391 | 0.518 | 3.4E-297 | S100A6  | S100 calcium binding protein A6 [Source:HGNC Symbol;Acc:HGNC:10496]                                       |
| 2.93E-44 | -0.270181 | 0.193 | 0.24  | 5.93E-40 | MT1G    | metallothionein 1G [Source:HGNC Symbol;Acc:HGNC:7399]                                                     |
| 0        | -0.281612 | 0.148 | 0.382 | 0        | SPP1    | secreted phosphoprotein 1 [Source:HGNC Symbol;Acc:HGNC:11255]                                             |
| 0        | -0.286619 | 0.018 | 0.156 | 0        | S100A2  | S100 calcium binding protein A2 [Source:HGNC Symbol;Acc:HGNC:10492]                                       |
| 0        | -0.339943 | 0.107 | 0.312 | 0        | FXYP2   | FXYP domain containing ion transport regulator 2 [Source:HGNC Symbol;Acc:HGNC:4026]                       |
| 0        | -0.3402   | 0.104 | 0.27  | 0        | CLU     | clusterin [Source:HGNC Symbol;Acc:HGNC:2095]                                                              |
| 0        | -0.376388 | 0.864 | 0.909 | 0        | MT-ND5  | mitochondrially encoded NADH:ubiquinone oxidoreductase core subunit 5 [Source:HGNC Symbol;Acc:HGNC:7461]  |
| 0        | -0.387977 | 0.065 | 0.272 | 0        | DEFB1   | defensin beta 1 [Source:HGNC Symbol;Acc:HGNC:2766]                                                        |
| 0        | -0.402613 | 0.116 | 0.341 | 0        | ATP1B1  | ATPase Na <sup>+</sup> /K <sup>+</sup> transporting subunit beta 1 [Source:HGNC Symbol;Acc:HGNC:804]      |
| 0        | -0.432941 | 0.937 | 0.967 | 0        | MT-ND1  | mitochondrially encoded NADH:ubiquinone oxidoreductase core subunit 1 [Source:HGNC Symbol;Acc:HGNC:7455]  |
| 0        | -0.464177 | 0.046 | 0.291 | 0        | WFDC2   | WAP four-disulfide core domain 2 [Source:HGNC Symbol;Acc:HGNC:15939]                                      |
| 0        | -0.504495 | 0.759 | 0.826 | 0        | MT-ND4L | mitochondrially encoded NADH:ubiquinone oxidoreductase core subunit 4L [Source:HGNC Symbol;Acc:HGNC:7460] |
