# Supplementary material
Source: PubMed Central journal article supplement (PMC8897263)
Supplement: NIHMS1750417-supplement-St4.pdf [file NIHMS1750417-supplement-St4.pdf]

Table S4: Cell counts in pseudotime states for proximal tubule and endothelial cells.

**Proximal Tubule, Singleplex**

| State | phenotype  | Group                    | Cell_Count |
|-------|------------|--------------------------|------------|
| 1     | Transplant | Singplex_Proximal_Tubule | 17         |
| 1     | Normal     | Singplex_Proximal_Tubule | 2780       |
| 2     | Transplant | Singplex_Proximal_Tubule | 289        |
| 2     | Normal     | Singplex_Proximal_Tubule | 1219       |
| 3     | Normal     | Singplex_Proximal_Tubule | 338        |
| 4     | Normal     | Singplex_Proximal_Tubule | 1482       |
| 5     | Normal     | Singplex_Proximal_Tubule | 414        |
| 6     | Normal     | Singplex_Proximal_Tubule | 12         |
| 7     | Transplant | Singplex_Proximal_Tubule | 77         |
| 7     | Normal     | Singplex_Proximal_Tubule | 2988       |
| 8     | Transplant | Singplex_Proximal_Tubule | 14         |
| 8     | Normal     | Singplex_Proximal_Tubule | 349        |
| 9     | Normal     | Singplex_Proximal_Tubule | 2343       |

**Proximal Tubule, Mux-Seq**

| State | phenotype  | Group                     | Cell_Count |
|-------|------------|---------------------------|------------|
| 1     | Transplant | Multiplex_Proximal_Tubule | 770        |
| 1     | Normal     | Multiplex_Proximal_Tubule | 479        |
| 2     | Transplant | Multiplex_Proximal_Tubule | 313        |
| 2     | Normal     | Multiplex_Proximal_Tubule | 985        |
| 3     | Transplant | Multiplex_Proximal_Tubule | 33         |
| 3     | Normal     | Multiplex_Proximal_Tubule | 25         |
| 4     | Transplant | Multiplex_Proximal_Tubule | 137        |
| 4     | Normal     | Multiplex_Proximal_Tubule | 234        |
| 5     | Transplant | Multiplex_Proximal_Tubule | 265        |
| 5     | Normal     | Multiplex_Proximal_Tubule | 2065       |

**Endothelial cells, Singleplex**

| State | phenotype  | Group                | Cell_Count |
|-------|------------|----------------------|------------|
| 1     | Transplant | Singplex_Endothelial | 3724       |
| 1     | Normal     | Singplex_Endothelial | 14         |
| 2     | Transplant | Singplex_Endothelial | 86         |
| 2     | Normal     | Singplex_Endothelial | 34         |
| 3     | Transplant | Singplex_Endothelial | 192        |
| 3     | Normal     | Singplex_Endothelial | 180        |
| 4     | Transplant | Singplex_Endothelial | 204        |
| 4     | Normal     | Singplex_Endothelial | 4800       |
| 5     | Transplant | Singplex_Endothelial | 81         |
| 5     | Normal     | Singplex_Endothelial | 2013       |
| 6     | Transplant | Singplex_Endothelial | 527        |
| 6     | Normal     | Singplex_Endothelial | 487        |
| 7     | Transplant | Singplex_Endothelial | 901        |
| 7     | Normal     | Singplex_Endothelial | 6          |

**Endothelial cells, Mux-Seq**

| State | phenotype  | Group                 | Cell_Count |
|-------|------------|-----------------------|------------|
| 1     | Transplant | Multiplex_Endothelial | 493        |
| 1     | Normal     | Multiplex_Endothelial | 862        |
| 2     | Transplant | Multiplex_Endothelial | 2116       |
| 2     | Normal     | Multiplex_Endothelial | 608        |
| 3     | Transplant | Multiplex_Endothelial | 3          |
| 3     | Normal     | Multiplex_Endothelial | 2          |
| 4     | Transplant | Multiplex_Endothelial | 276        |
| 4     | Normal     | Multiplex_Endothelial | 238        |
| 5     | Transplant | Multiplex_Endothelial | 459        |
| 5     | Normal     | Multiplex_Endothelial | 529        |
